# Supplementary material for: Synthesis of Functionalized 3H-pyrrolo-[1,2,3-de] Quinoxalines via Gold-Catalyzed Intramolecular Hydroamination of Alkynes
Source: MDPI journal article supplement (doi:10.3390/molecules28155831), 2023-08-02

## Supplementary Materials

# Synthesis of Functionalized 3*H*-pyrrolo-[1,2,3-*de*] Quinoxalines via Gold-Catalyzed Intramolecular Hydroamination of Alkynes

Antonia Iazzetti <sup>1,2,†</sup>, Giancarlo Fabrizi <sup>3,\*</sup>, Antonella Goggiamani <sup>3</sup>, Federico Marrone <sup>3</sup>, Alessio Sferrazza <sup>3,4,\*</sup> and Karim Ullah <sup>3</sup>

<sup>1</sup> Dipartimento di Scienze Biotechnologiche di base, Cliniche Intensivologiche e Perioperatorie, Università Cattolica del Sacro Cuore, L.go Francesco Vito 1, 00168 Rome, Italy; antonia.iazzetti@unicatt.it

<sup>2</sup> Policlinico Universitario 'A. Gemelli' Foundation-IRCCS, 00168 Rome, Italy

<sup>3</sup> Dipartimento di Chimica e Tecnologie del Farmaco, Sapienza, Università di Roma, P. le A. Moro 5, 00185 Rome, Italy; antonella.goggiamani@uniroma1.it (A.G.); federico.marrone@uniroma1.it (F.M.); karim.ullah@uniroma1.it (K.U.)

<sup>4</sup> Medicinal Chemistry Department, IRBM S.p.A., 00071 Pomezia, Italy

\* Correspondence: giancarlo.fabrizi@uniroma1.it (G.F.); a.sferrazza@irbm.com (A.S.)

† Alessio Sferrazza is currently a research scientist in Medicinal Chemistry Department, IRBM S.p.A., 00071 Pomezia, Italy

## Contents

|                                                                                                                                                               |          |
|---------------------------------------------------------------------------------------------------------------------------------------------------------------|----------|
| <b>1. SYNTHETIC PROCEDURES FOR STARTING MATERIALS .....</b>                                                                                                   | <b>3</b> |
| 1.1 General procedure for the preparation of substituted 1-(3-arylprop-2-yn-1-yl)-2-aryl-1 <i>H</i> -indol-7-amine <b>1</b> .....                             | 3        |
| 1.1.a. Typical procedure for the preparation of 5- substituted-7-nitro-2-phenyl-1 <i>H</i> -indole <b>5</b> .....                                             | 3        |
| 1.1.b. Typical procedure for the preparation of substituted 7-nitro-2-phenyl-1-(prop-2-yn-1-yl)-1 <i>H</i> -indoles <b>6</b> .....                            | 4        |
| 1.1.c. Typical procedure for the preparation of substituted 1-(3-arylprop-2-yn-1-yl)-7-nitro-2-phenyl-1 <i>H</i> -indoles <b>7</b> .....                      | 4        |
| 1.1.d. Typical procedure for the synthesis of substituted 1-(3-arylprop-2-yn-1-yl)-2-aryl-1 <i>H</i> -indol-7-amine <b>1</b> .....                            | 5        |
| 1.2. General procedure for the preparation of 1-(4-(3-(7-amino-5-methyl-2,3-diphenyl-1 <i>H</i> -indol-1-yl)prop-1-yn-1-yl)phenyl)ethan-1-one <b>11</b> ..... | 5        |
| <b>2. PROCEDURE FOR THE SYNTHESIS OF COMPOUND 9d .....</b>                                                                                                    | <b>7</b> |
| <b>3. CHARACTERIZATION DATA OF STARTING MATERIALS .....</b>                                                                                                   | <b>9</b> |
| 3.1 Characterization data of 5-substituted 7-nitro-2-aryl-1 <i>H</i> -indole <b>5</b> .....                                                                   | 9        |
| 3.2 Characterization data of 7-nitro-2-aryl-1-(prop-2-yn-1-yl)-1 <i>H</i> -indole <b>6</b> .....                                                              | 9        |

|                                                                                                          |            |
|----------------------------------------------------------------------------------------------------------|------------|
| 3.3 Characterization data of 7-nitro-2-aryl-1-(3-phenylprop-2-yn-1-yl)-1 <i>H</i> -indole <b>7</b> ..... | 11         |
| 3.4 Characterization data of 2-aryl-1-(3-phenylprop-2-yn-1-yl)-1 <i>H</i> -indol-7-amines <b>1</b> ..... | 15         |
| <b>4. REFERENCES</b> .....                                                                               | <b>18</b>  |
| <b>5. HF CALCULATION ON ISOMERS 2a and 2'a</b> .....                                                     | <b>19</b>  |
| <b>6. COPIES OF NMR SPECTRA</b>                                                                          | <b>198</b> |

## 1. SYNTHETIC PROCEDURES FOR STARTING MATERIALS

### 1.1 General procedure for the preparation of substituted 1-(3-arylprop-2-yn-1-yl)-2-aryl-1H-indol-7-amine **1**

Starting materials **1** were prepared according to literature procedures through the four-step sequence of reactions depicted in scheme S1.

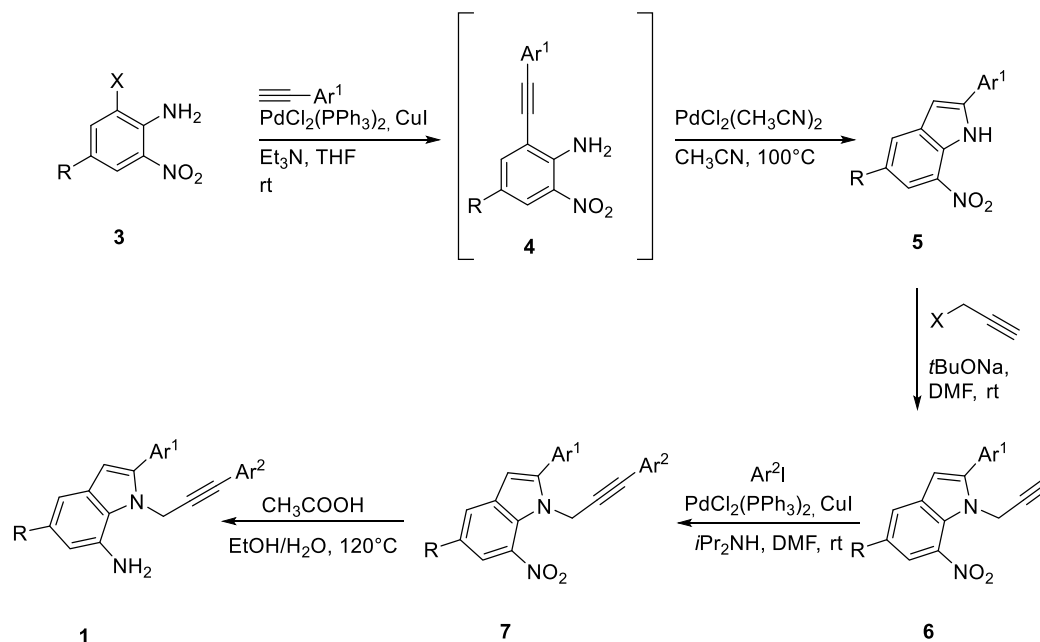

**Scheme S1.** Preparation of starting materials **1**

#### 1.1.a. Typical procedure for the preparation of 5- substituted-7-nitro-2-phenyl-1H-indole **5**

##### STEP 1: synthesis of 5-chloro-7-nitro-2-phenyl-1H-indole **5a**

In a 100 ml two-necked round bottom flask, equipped with a magnetic stirring bar,  $\text{PdCl}_2(\text{PPh}_3)_2$  (0.329 g, 0.469 mmol, 0.04 equiv.) and  $\text{CuI}$  (0.045 g, 0.234 mmol, 0.02 equiv.) were dissolved in 36.0 mL of THF and 1.56 mL of  $\text{Et}_3\text{N}$  at room temperature and under a nitrogen atmosphere. Then, 2-iodo-4-chloro-6-nitroaniline (3.5 g, 11.74 mmol, 1.0 equiv.) was added and, dropwise, phenylacetylene (1.93 mL, 17.61 mmol, 1.5 equiv.). The solution was stirred for 2h. After this time, the reaction mixture was diluted with  $\text{Et}_2\text{O}$ , and washed with a saturated solution of  $\text{NH}_4\text{Cl}$ ,  $\text{NaHCO}_3$ , and brine. The organic layer was separated, dried over  $\text{Na}_2\text{SO}_4$ , filtered, and concentrated under reduced pressure. The residue, containing 4-chloro-2-nitro-6-(phenylethynyl)aniline **4a**, was transferred with 60 mL of MeCN in a two-necked 100-mL round bottom flask equipped with a condenser, and a magnetic stirring bar, then  $\text{PdCl}_2(\text{CH}_3\text{CN})_2$  was added. The solution was stirred for 2.5 h at 100 °C. After this time, the mixture was cooled to room temperature, concentrated under reduced pressure, purified by chromatography on  $\text{SiO}_2$  (25-40  $\mu\text{m}$ ), eluting with an 92/8 (v/v) *n*-hexane-AcOEt mixture ( $R_f$  = 0.26) to obtain 5-chloro-7-nitro-2-phenyl-1H-indole **5a** (2.57 g, 80 % yield).

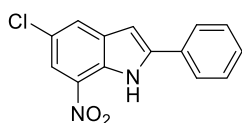

**5-chloro-7-nitro-2-phenyl-1H-indole **5a****: yield: 80%; orange solid; mp: 164 - 166 °C;  $^1\text{H}$  NMR (400.13 MHz) ( $\text{CDCl}_3$ ):  $\delta$  10.07 (bs, 1 H), 8.11 (d,  $J$  = 1.5 Hz, 1 H), 7.93 - 7.88 (m, 1 H), 7.74 (d,  $J$  = 7.8 Hz, 1 H), 7.53 (t,  $J$

= 7.3 Hz, 2 H), 7.45 (t,  $J$  = 7.3 Hz, 2 H), 6.90 (d,  $J$  = 2.4 Hz, 1 H), 5.05 (d,  $J$  = 2.4 Hz, 2 H), 2.20 (t,  $J$  = 2.4 Hz, 1 H);  $^{13}\text{C}$  NMR (100.6 MHz) ( $\text{CDCl}_3$ ):  $\delta$  142.0 (C), 133.7 (C), 133.5 (C), 130.4 (C), 129.34 (CH), 129.27 (CH), 128.8 (C), 127.6 (CH), 125.7 (CH), 125.1 (C), 118.7 (CH), 100.1 (CH).

1.1.b. Typical procedure for the preparation of substituted 7-nitro-2-phenyl-1-(prop-2-yn-1-yl)-1H-indoles 6  
STEP 2: synthesis of 5-chloro-7-nitro-2-phenyl-1-(prop-2-yn-1-yl)-1H-indole 6a

A 250 mL round bottom flask, equipped with a magnetic stirring bar, was charged with  $\text{tBuONa}$  (1.35 g, 14.02 mmol, 1.5 equiv) and 90 mL of anhydrous DMF. The reaction mixture was cooled at  $0^\circ\text{C}$  and 5-chloro-7-nitro-2-phenyl-1H-indole (2.4 g, 9.35 mmol, 1.0 equiv) was added dropwise. Then, propargyl bromide (1.21 mL, 14.02 mmol, 1.5 equiv) was added and the solution was warmed to room temperature and stirred for 6 h. After this time, the reaction mixture was diluted with  $\text{Et}_2\text{O}$  and washed with saturated solution of  $\text{NaHCO}_3$  and brine. The organic layer was dried over  $\text{Na}_2\text{SO}_4$ , filtered, and concentrated under reduced pressure. The residue was purified by chromatography on  $\text{SiO}_2$  (25-40  $\mu\text{m}$ ), eluting with an 96/4 (v/v)  $n$ -hexane-AcOEt mixture ( $R_f$  = 0.25) to obtain 5-chloro-7-nitro-2-phenyl-1-(prop-2-yn-1-yl)-1H-indole **6a** (2.324 g, 80 % yield).

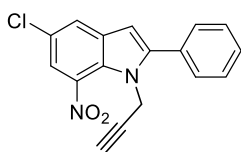

**5-chloro-7-nitro-2-phenyl-1-(prop-2-yn-1-yl)-1H-indole 6a:** 80 % yield; brown solid; mp  $103 - 104^\circ\text{C}$ ;  $^1\text{H}$  NMR (400.13 MHz) ( $\text{CDCl}_3$ ):  $\delta$  7.92 (d,  $J$  = 1.9 Hz, 1 H), 7.87 (d,  $J$  = 1.9 Hz, 1 H), 7.58-7.50 (m, 5 H), 6.70 (s, 1 H), 5.05 (d,  $J$  = 2.4 Hz, 2 H), 2.20 (t,  $J$  = 2.4 Hz, 1 H);  $^{13}\text{C}$  NMR (100.6 MHz) ( $\text{CDCl}_3$ ):  $\delta$  146.8 (C), 137.3 (C), 134.3 (C), 130.6 (C), 129.6 (CH), 129.4 (CH), 129.1 (CH), 127.1 (C), 126.0 (CH), 125.2 (C), 119.8 (CH), 104.1 (CH), 77.1 (C), 74.4 (CH), 37.1 ( $\text{CH}_2$ ).

1.1.c. Typical procedure for the preparation of substituted 1-(3-arylprop-2-yn-1-yl)-7-nitro-2-phenyl-1H-indoles 7

STEP 3: synthesis of 5-chloro-1-(3-(4-methoxyphenyl)prop-2-yn-1-yl)-7-nitro-2-phenyl-1H-indole 7c

In a two-necked 50-mL round bottom flask, equipped with a magnetic stirring bar,  $\text{PdCl}_2(\text{PPh}_3)_2$  (0.084 g, 0.119 mmol, 0.04 equiv.) and  $\text{CuI}$  (0.011 g, 0.0597 mmol, 0.02 equiv.) were dissolved in 12.3 mL of  $i\text{Pr}_2\text{NH}$  and 6.1 mL of DMF at room temperature and under nitrogen; then, 4-iodoanisole (0.839 g, 3.584 mmol, 1.2 equiv.) and 5-chloro-7-nitro-2-phenyl-1-(prop-2-yn-1-yl)-1H-indole (0.928 g, 2.98 mmol, 1.0 equiv.) were added and the resulting mixture was stirred for 24 h. After this time, the mixture was diluted with  $\text{Et}_2\text{O}$  and washed with a saturated solution of  $\text{NH}_4\text{Cl}$ , a saturated solution of  $\text{NaHCO}_3$ , and with brine. The organic layer was dried over  $\text{Na}_2\text{SO}_4$ , filtered, and concentrated under reduced pressure. The residue was purified by chromatography on  $\text{SiO}_2$  (25-40  $\mu\text{m}$ ), eluting with a 93/7 (v/v)  $n$ -hexane/AcOEt mixture ( $R_f$  = 0.27) to obtain 5-chloro-1-(3-(4-methoxyphenyl)prop-2-yn-1-yl)-7-nitro-2-phenyl-1H-indole **7c** (0.860 g, 70% yield).

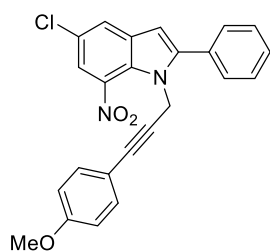

**5-chloro-1-(3-(4-methoxyphenyl)prop-2-yn-1-yl)-7-nitro-2-phenyl-1H-indole 7c:** 70 % yield; yellow solid; mp 133 - 134 °C;  $^1\text{H}$  NMR (400.13 MHz) ( $\text{CDCl}_3$ ):  $\delta$  7.91 (d,  $J$  = 1.9 Hz, 1 H), 7.87 (d,  $J$  = 1.9 Hz, 1 H), 7.60 - 7.50 (m, 5 H), 7.21 (d,  $J$  = 8.8 Hz, 2 H), 6.78 (d,  $J$  = 8.8 Hz, 2 H), 6.70 (s, 1 H), 5.23 (s, 2 H), 3.78 (s, 3 H);  $^{13}\text{C}$  NMR (100.6 MHz) ( $\text{CDCl}_3$ ):  $\delta$  159.9 (C), 146.7 (C), 138.2 (C), 137.5 (C), 134.2 (C), 133.2 (CH), 130.8 (C), 129.6 (CH), 129.3 (CH), 129.0 (CH), 127.1 (C), 125.8 (CH), 124.9 (C), 119.6 (CH), 113.8 (CH), 103.8 (CH), 86.1 (C), 80.9 (C), 55.2 ( $\text{CH}_3$ ), 38.2 ( $\text{CH}_2$ ).

**1.1.d. Typical procedure for the synthesis of substituted 1-(3-arylprop-2-yn-1-yl)-2-aryl-1H-indol-7-amine 1**  
**STEP 4: synthesis of 5-chloro-1-(3-(4-methoxyphenyl)prop-2-yn-1-yl)-2-phenyl-1H-indol-7-amine 1c**

In a 50 mL Carousel Tube Reactor (Radely Discovery Technology), equipped with a magnetic stirring bar, 5-chloro-1-(3-(4-methoxyphenyl)prop-2-yn-1-yl)-7-nitro-2-phenyl-1H-indole (0.180 g, 0.431 mmol, 1.0 equiv.) was added to a solution of EtOH/ $\text{H}_2\text{O}$  (3:1) and stirred at 120°C for 10 minutes. Then, 51  $\mu\text{l}$  of acetic acid and 72 mg of Fe (0) (0.431 mmol, 1.0 equiv.) were added in three portions every 15 minutes. The reaction mixture was then stirred for 2 hours before being cooled at room temperature, and concentrated under reduced pressure. Subsequently, the mixture was diluted with Et $_2\text{O}$  and washed with a saturated solution of  $\text{NaHCO}_3$ , and with brine. The organic layer was dried over  $\text{Na}_2\text{SO}_4$ , filtered, and concentrated under reduced pressure. The residue was purified by filtration on a pad of celite eluting with DCM to obtain 5-chloro-1-(3-(4-methoxyphenyl)prop-2-yn-1-yl)-2-phenyl-1H-indol-7-amine **1a** (0.140 g, 85% yield)

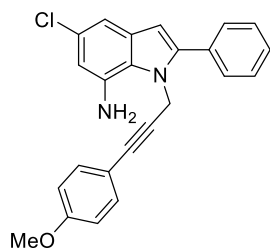

**5-chloro-1-(3-(4-methoxyphenyl)prop-2-yn-1-yl)-2-phenyl-1H-indol-7-amine 1c:** 85% yield; orange solid; mp 91 - 92 °C;  $^1\text{H}$  NMR (400.13 MHz) ( $\text{CDCl}_3$ ):  $\delta$  7.71 - 7.68 (m, 2 H), 7.55 - 7.49 (m, 2 H), 7.48 - 7.44 (m, 1 H), 7.42 (d,  $J$  = 8.8 Hz, 2 H), 7.09 (d,  $J$  = 1.8 Hz, 1 H), 6.89 (d,  $J$  = 8.8 Hz, 2H), 6.54 (d,  $J$  = 1.8 Hz, 1 H), 6.47 (s, 1 H), 5.17 (s, 2 H), 4.35 (bs, 2 H), 3.84 (s, 3 H);  $^{13}\text{C}$  NMR (100.6 MHz) ( $\text{CDCl}_3$ ):  $\delta$  160.1 (C), 143.2 (C), 134.0 (C), 133.2 (CH), 131.9 (C), 130.8 (C), 129.3 (CH), 128.7 (CH), 128.3 (CH), 127.1 (C), 126.3 (C), 114.1 (CH), 113.8 (C), 111.3 (CH), 110.1 (CH), 102.4 (CH), 86.6 (C), 84.9 (C), 55.3 ( $\text{CH}_3$ ), 36.5 ( $\text{CH}_2$ ).

**1.2. General procedure for the preparation of 1-(4-(3-(7-amino-5-methyl-2,3-diphenyl-1H-indol-1-yl)prop-1-yn-1-yl)phenyl)ethan-1-one 1l**

Starting material 1l was prepared according to literature procedures from 5-methyl-7-nitro-2-phenyl-1H-indole through the sequence of reactions depicted in scheme S2.

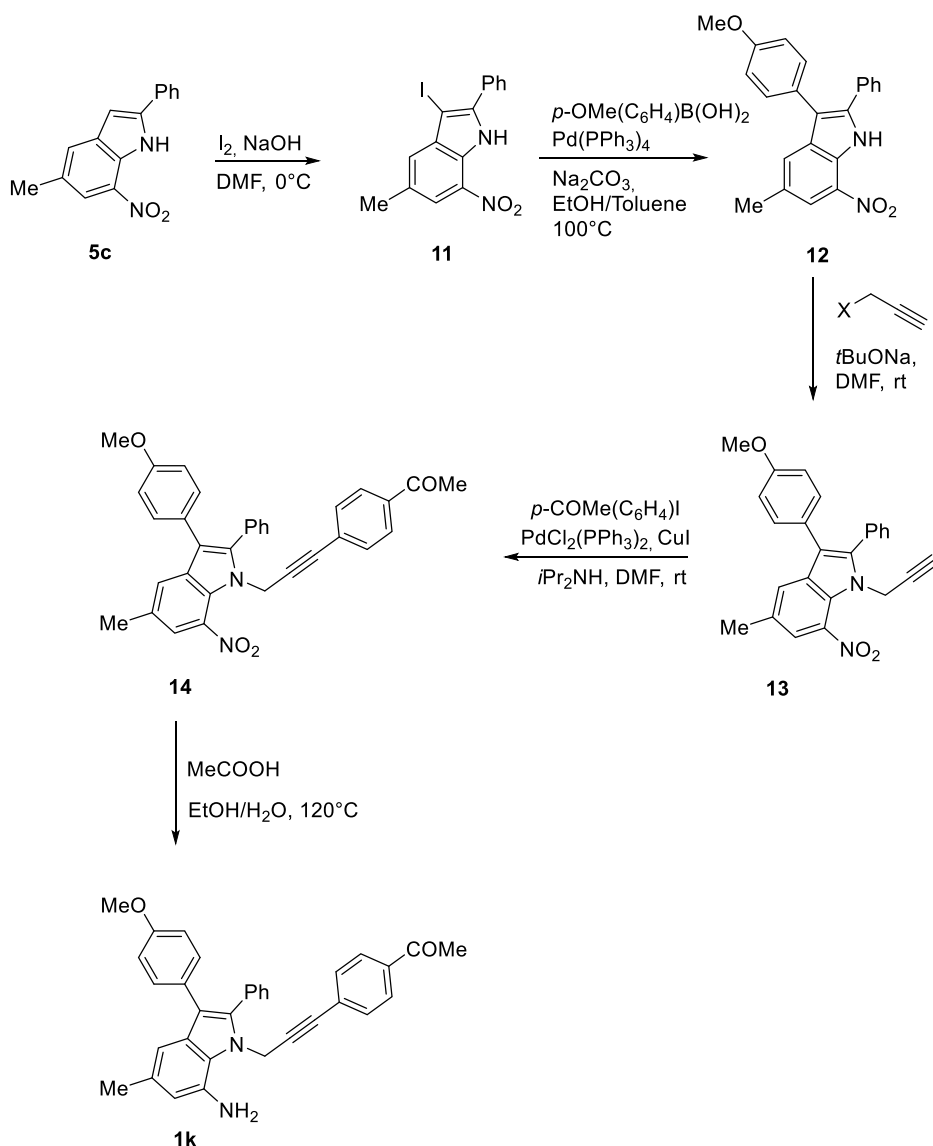

## Scheme S2. Preparation of starting materials **1k**

### STEP 1: synthesis of 3-iodo-5-methyl-7-nitro-2-phenyl-1H-indole

To a solution of 5-methyl-7-nitro-2-phenyl-1H-indole **5c** (1.0 g, 3.982 mmol, 1.0 equiv.) in DMF (8.0 mL) KOH (0.671 g, 11.94 mmol, 3.0 equiv.) was added at 0°C and the resulting mixture was stirred for 10 minutes before a solution of iodine (1.061 g, 4.181 mmol, 1.05 equiv.) in DMF (10.0 mL) was added dropwise over 5 minutes. After 1 h, the mixture was poured into a saturated solution of NH<sub>4</sub>Cl and Na<sub>2</sub>S<sub>2</sub>O<sub>3</sub> to precipitate the product. The solid material was filtered off, solubilized in Et<sub>2</sub>O, washed with water and dried over Na<sub>2</sub>SO<sub>4</sub>. After filtration, the mixture was concentrated under reduced pressure to give of 3-iodo-5-methyl-7-nitro-2-phenyl-1H-indole as an orange powder (0.97 g, 65% yield).

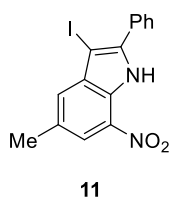

**3-iodo-5-methyl-7-nitro-2-phenyl-1H-indole 11:** 65% yield; orange solid; mp: 143-145 °C; <sup>1</sup>H NMR (400.13 MHz) (CDCl<sub>3</sub>): δ 10.06 (bs, 1 H), 8.07 (s, 1 H), 7.88-7.82 (m, 2 H), 7.67 (s, 1 H), 7.61-7.47 (m, 3 H), 2.59 (s, 3 H); <sup>13</sup>C NMR (100.6 MHz) (CDCl<sub>3</sub>): δ 140.6 (C), 135.3 (C), 132.4 (C), 131.0 (C), 130.3 (C), 129.9 (CH), 129.4 (CH), 128.9 (CH), 128.6 (C), 128.5 (CH), 121.0 (CH), 58.4 (C), 21.2 (CH<sub>3</sub>).

STEP 2: synthesis of 5-methyl-7-nitro-2,3-diphenyl-1H-indole

In a three-necked round bottom flask, equipped with a condenser and magnetic stirring bar, [Pd(PPh<sub>3</sub>)<sub>4</sub>] (115.4 mg, 0.10 mmol, 0.05 equiv.) was dissolved at room temperature in 25 mL of EtOH/Toluene (2:1) under argon; then, 3-iodo-5-methyl-7-nitro-2-phenyl-1H-indole (0.756 g, 2.0 mmol, 1.0 equiv.), 4-methoxyphenylboronic acid (0.912 g, 6.0 mmol, 3.0 equiv.), and Na<sub>2</sub>CO<sub>3</sub> (2.39 g, 22.6 mmol, 3.0 equiv.) were added and the mixture was refluxed for 16 hours. After this time, the mixture was cooled to room temperature, diluted with CH<sub>2</sub>Cl<sub>2</sub> and washed with brine. The organic layer was dried over Na<sub>2</sub>SO<sub>4</sub>, filtered, and concentrated under reduced pressure. The residue was purified by chromatography on SiO<sub>2</sub> (25-40 μm), eluting with an 80/20 (v/v) *n*-hexane-AcOEt mixture (R<sub>f</sub> = 0.22) to obtain the desired product (0.609 g, 85% yield)

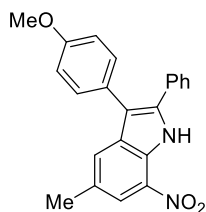

12

**3-(4-methoxyphenyl)-5-methyl-7-nitro-2-phenyl-1H-indole 12:** 85% yield; yellow solid; mp: 133-135 °C; <sup>1</sup>H NMR (400.13 MHz) (CDCl<sub>3</sub>): δ 9.89 (bs, 1 H), 8.03 (s, 1 H), 7.75 (s, 1 H), 7.53-7.46 (m, 2 H), 7.43-7.31 (m, 5 H), 6.99 (d, *J* = 8.7 Hz, 1 H), 3.89 (s, 3 H), 2.52 (s, 3 H); <sup>13</sup>C NMR (100.6 MHz) (CDCl<sub>3</sub>): δ 158.7 (C), 136.1 (C), 133.1 (C), 132.3 (C), 131.5 (C), 131.3 (CH), 129.6 (C), 128.9 (CH), 128.7 (C), 128.4 (CH), 128.1 (CH), 127.9 (CH), 125.9 (C), 120.3 (CH), 115.0 (C), 114.3 (CH), 55.3 (CH<sub>3</sub>), 21.1 (CH<sub>3</sub>).

STEPS 3 – 5 were carried out with procedures described in paragraphs 2.1b -d

## 2. PROCEDURE FOR THE SYNTHESIS OF COMPOUND 9d

A flame dried 50 mL Carousel Tube Reactor (Radely Discovery Technology), equipped with a magnetic stirring bar, was charged with 8-chloro-2-(4-methoxybenzyl)-5-phenyl-3H-pyrrolo[1,2,3-*de*]quinoxaline **2c** (50.0 mg, 0.13 mmol, 1.0 equiv) dissolved in anhydrous 2 mL of THF under argon. Then, a solution of LiAlH<sub>4</sub> 2 M in THF (108 μL, 0.26 mmol, 2.0 equiv.) was added at 0°C and the mixture was stirred for 15 minutes at 80°C. After this time, the mixture was diluted with Et<sub>2</sub>O and washed with a saturated NaHCO<sub>3</sub> solution and brine. The organic layer was dried over Na<sub>2</sub>SO<sub>4</sub>, filtered, concentrated under reduced pressure. The resulting residue was purified by chromatography on SiO<sub>2</sub> (25-40 μm), eluting with a 93/7 (v/v) *n*-hexane/AcOEt mixture (R<sub>f</sub> = 0.27) to obtain 8-chloro-2-(4-methoxybenzyl)-5-phenyl-2,3-dihydro-1H-pyrrolo[1,2,3-*de*]quinoxaline (49.5 mg, 98 % yield).

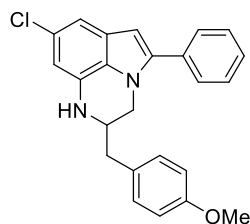

**8-chloro-2-(4-methoxybenzyl)-5-phenyl-2,3-dihydro-1H-pyrrolo[1,2,3-*de*]quinoxaline 9d:** 98 % yield; brown oil;  $^1\text{H}$  NMR (400.13 MHz) ( $\text{CDCl}_3$ ): 7.53-7.42 (m, 4 H), 7.44-7.35 (m, 3 H), 7.08 (d,  $J = 1.8$  Hz, 1 H), 6.93 (d,  $J = 8.8$  Hz, 2 H), 6.48 (s, 1 H), 6.47 (d,  $J = 1.8$  Hz, 1 H), 4.76 (bs, 1 H), 4.45 - 4.33 (m, 2 H), 3.84 (s, 3 H), 3.74-3.64 (m, 1 H), 2.45-2.28 (m, 2 H);  $^{13}\text{C}$  NMR (100.6 MHz) ( $\text{CDCl}_3$ ):  $\delta$  159.2 (C), 143.7 (C), 136.6 (C), 135.9 (C), 132.7 (C), 131.7 (C), 129.3 (CH), 128.6 (CH), 128.1 (CH), 127.7 (CH), 127.4 (C), 126.2 (C), 114.2 (CH), 110.4 (CH), 108.5 (CH), 103.4 (CH), 62.4 (CH), 55.4 ( $\text{CH}_3$ ), 46.6 ( $\text{CH}_2$ ), 38.6 ( $\text{CH}_2$ ).



### 3. CHARACTERIZATION DATA OF STARTING MATERIALS

#### 3.1 Characterization data of 5-substituted 7-nitro-2-aryl-1H-indole 5

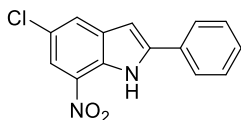

**5-chloro-7-nitro-2-phenyl-1H-indole 5a** 80 % yield; orange solid; mp: 164 - 166 °C; <sup>1</sup>H NMR (400.13 MHz) (CDCl<sub>3</sub>): δ 10.07 (bs, 1 H), 8.11 (d, *J* = 1.5 Hz, 1 H), 7.93 - 7.88 (m, 1 H), 7.74 (d, *J* = 7.8 Hz, 1 H), 7.53 (t, *J* = 7.3 Hz, 2 H), 7.45 (t, *J* = 7.3 Hz, 2 H), 6.90 (d, *J* = 2.4 Hz, 1 H), 5.05 (d, *J* = 2.4 Hz, 2 H), 2.20 (t, *J* = 2.4 Hz, 1 H); <sup>13</sup>C NMR (100.6 MHz) (CDCl<sub>3</sub>): δ 142.0 (C), 133.7 (C), 133.5 (C), 130.4 (C), 129.34 (CH), 129.27 (CH), 128.8 (C), 127.6 (CH), 125.7 (CH), 125.1 (C), 118.7 (CH), 100.1 (CH).

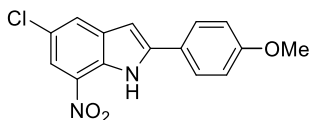

**5-chloro-2-(4-methoxyphenyl)-7-nitro-1H-indole 5b**: 72 % yield; yellow - orange solid; mp: 196 - 198 °C; <sup>1</sup>H NMR (400.13 MHz) (DMSO- *d*<sub>6</sub>): δ 11.78 (bs, 1 H), 8.13 (d, *J* = 1.3 Hz, 1 H), 8.05 (d, *J* = 1.3 Hz, 1 H), 8.01 (d, *J* = 8.7 Hz, 2 H), 7.12 (d, *J* = 8.7 Hz, 2 H), 7.1 (s, 1 H), 3.89 (s, 3 H); <sup>13</sup>C NMR (100.6 MHz) (DMSO- *d*<sub>6</sub>): δ 160.3 (C), 143.8 (C), 134.6 (C), 133.0 (C), 128.8 (CH), 128.7 (C), 127.0 (CH), 123.6 (C), 123.3 (C), 117.5 (CH), 114.7 (CH), 99.9 (CH), 55.8 (CH<sub>3</sub>).

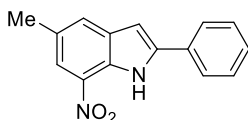

**5-methyl-7-nitro-2-phenyl-1H-indole 5c**: 97 % yield; yellow solid; mp 172 - 174 °C <sup>[1]</sup>; <sup>1</sup>H NMR (400.13 MHz) (CDCl<sub>3</sub>): δ 9.87 (s, 1H), 7.88 (s, 1H), 7.73–7.57 (m, 3H), 7.56–7.24 (m, 3H), 6.78 (s, 1H), 2.47 (s, 3H); <sup>13</sup>C NMR (100.6 MHz, CDCl<sub>3</sub>) δ 140.5 (C), 133.04 (C), 132.3 (C), 131.0 (C), 129.5 (C), 129.2 (CH), 128.8 (C), 128.8 (CH), 128.7 (CH), 125.5 (CH), 119.9 (CH), 100.0 (CH), 21.1 (CH<sub>3</sub>).

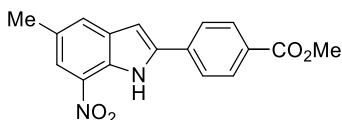

**methyl 4-(5-methyl-7-nitro-1H-indol-2-yl)benzoate 5d** 98 % yield; yellow solid; mp: 244 - 246 °C; <sup>1</sup>H NMR (400.13 MHz) (CDCl<sub>3</sub>): δ 9.96 (s, 1H), 8.08 (d, *J* = 8.2 Hz, 2H), 7.93 (s, 1H), 7.72 (d, *J* = 8.7 Hz, 3H), 6.90 (d, *J* = 1.7 Hz, 1H), 3.89 (s, 3H), 2.46 (s, 3H); <sup>13</sup>C NMR (100.6 MHz, CDCl<sub>3</sub>) δ 166.5 (C), 139.1 (C), 135.1 (C), 132.8 (C), 132.5 (C), 130.5 (CH), 129.9 (C), 129.9 (C), 129.1 (CH), 125.2 (CH), 120.7 (CH), 101.7 (CH), 52.3 (CH<sub>3</sub>), 21.1 (CH<sub>3</sub>).

#### 3.2 Characterization data of 7-nitro-2-aryl-1-(prop-2-yn-1-yl)-1H-indole 6

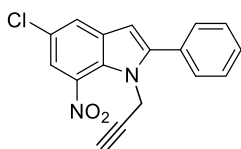

**5-chloro-7-nitro-2-phenyl-1-(prop-2-yn-1-yl)-1H-indole 6a:** 80 % yield; brown solid; mp: 114 - 116 °C; <sup>1</sup>H NMR (400.13 MHz) (CDCl<sub>3</sub>): δ 7.92 (d, *J* = 1.9 Hz, 1 H), 7.87 (d, *J* = 1.9 Hz, 1 H), 7.58-7.50 (m, 5 H), 6.70 (s, 1 H), 5.05 (d, *J* = 2.4 Hz, 2 H), 2.20 (t, *J* = 2.4 Hz, 1 H); <sup>13</sup>C NMR (100.6 MHz) (CDCl<sub>3</sub>): δ 160.6 (C), 147.1 (C), 137.3 (C), 134.5 (C), 131.4 (CH), 126.7 (C), 126.3 (CH), 124.4 (C), 122.6 (C), 119.3 (CH), 115.1 (CH), 104.0 (CH), 78.0 (C), 77.5 (CH), 55.8 (CH<sub>3</sub>), 37.2 (CH<sub>2</sub>).

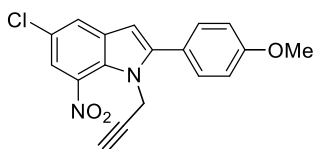

**5-chloro-2-(4-methoxyphenyl)-7-nitro-1-(prop-2-yn-1-yl)-1H-indole 6b:** 50 % yield; yellow solid; mp: 146 - 148 °C; <sup>1</sup>H NMR (400.13 MHz) (DMSO *d*<sub>6</sub>): δ 8.12 (d, *J* = 1.7 Hz, 1 H), 7.96 (d, *J* = 1.7 Hz, 1 H), 7.56 (d, *J* = 8.6 Hz, 2 H), 7.14 (d, *J* = 8.6 Hz, 2 H), 6.80 (s, 1 H), 4.97 (d, *J* = 2.4 Hz, 2 H), 3.85 (s, 1 H), 3.33 - 3.30 (m, 1 H); <sup>13</sup>C NMR (100.6 MHz) (DMSO *d*<sub>6</sub>): δ 160.5 (C), 146.8 (C), 137.2 (C), 134.4 (C), 130.9 (CH), 125.7 (CH), 125.1 (C), 122.8 (C), 119.5 (CH), 114.7 (C), 114.5 (CH), 103.5 (CH), 77.2 (C), 74.4 (CH), 55.45 (CH<sub>3</sub>), 37.1 (CH<sub>2</sub>).

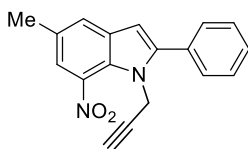

**5-methyl-7-nitro-2-phenyl-1-(prop-2-yn-1-yl)-1H-indole 6c:** 88 % yield; brown solid; mp: 94 - 96 °C; <sup>1</sup>H NMR (400.13 MHz, CDCl<sub>3</sub>) δ 7.63 (s, 1H), 7.53 (s, 1H), 7.49-7.10 (m, 5H), 6.50 (s, 1H), 4.90 (d, *J* = 2.3 Hz, 2H), 2.35 (s, 3H), 1.98 (t, *J* = 2.3 Hz, 1H). <sup>13</sup>C NMR (100.6 MHz) (CDCl<sub>3</sub>): δ 145.6 (C), 137.1 (C), 133.7 (C), 131.3 (C), 129.9 (C), 129.6 (CH), 129.0 (CH), 129.0 (CH), 127.4 (C), 127.1 (CH), 121.2 (CH), 104.3 (CH), 77.68 (C), 73.93 (C), 36.94 (CH<sub>2</sub>), 20.83 (CH<sub>3</sub>).

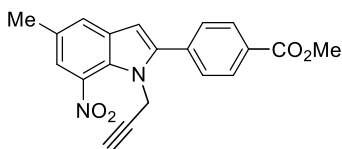

**methyl 4-(5-methyl-7-nitro-1-(prop-2-yn-1-yl)-1H-indol-2-yl)benzoate 6d:** 63 % yield; orange solid; mp 166 - 164 °C; <sup>1</sup>H NMR (400.13 MHz) (CDCl<sub>3</sub>): δ 8.20 (d, *J* = 8.5 Hz, 2 H), 7.82 (s, 1 H), 7.74 (s, 1 H), 8.20 (d, *J* = 8.5 Hz, 2 H), 7.61 (d, *J* = 8.5 Hz, 2 H), 6.75 (s, 1 H), 5.05 (d, *J* = 2.4 Hz, 2 H), 3.99 (s, 3 H), 2.54 (s, 3 H), 2.17 (t, *J* = 2.4 Hz, 2 H); <sup>13</sup>C NMR (100.6 MHz) (400.13 MHz): δ 166.5 (C), 144.5 (C), 137.2 (C), 135.6 (C), 133.5 (C), 130.4 (C), 130.2 (C), 130.1 (CH), 129.3 (CH), 127.8 (C), 127.3 (CH), 121.8 (CH), 105.4 (CH), 77.3 (C), 74.0 (CH), 52.4 (CH<sub>3</sub>), 37.1 (CH<sub>2</sub>), 20.8 (CH<sub>3</sub>).

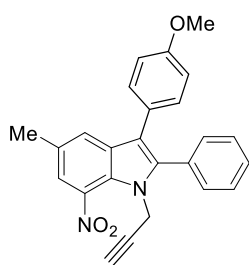

**5-methyl-7-nitro-2-phenyl-1-(prop-2-yn-1-yl)-1H-indole 13:** 70 % yield; orange liquid;  $^1\text{H}$  NMR (400.13 MHz) ( $\text{CDCl}_3$ ):  $\delta$  7.72 (d,  $J$  = 0.9 Hz, 1H), 7.66 (d,  $J$  = 0.9 Hz, 1H), 7.30 (m, 5H), 7.12–7.02 (m, 2H), 6.85–6.72 (m, 2H), 4.89 (d,  $J$  = 2.5 Hz, 2H), 3.73 (s, 3H), 2.43 (s, 3H), 2.10 (t,  $J$  = 2.4 Hz, 1H);  $^{13}\text{C}$  NMR (100.6 MHz) ( $\text{CDCl}_3$ ):  $\delta$  158.3 (C), 141.1 (C), 137.0 (C), 133.4 (C), 131.2 (CH), 131.1 (CH), 130.4 (C), 129.9 (C), 128.8 (CH), 128.7 (CH), 126.2 (C), 126.0 (CH), 125.7 (C), 121.5 (CH), 117.1 (C), 113.9 (CH), 77.8 (C), 73.8 (C), 55.2 ( $\text{CH}_3$ ), 36.6 ( $\text{CH}_2$ ), 20.9 ( $\text{CH}_3$ ).

### 3.3 Characterization data of 7-nitro-2-aryl-1-(3-phenylprop-2-yn-1-yl)-1H-indole 7

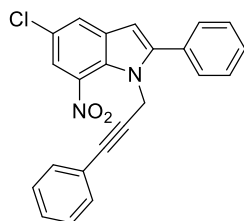

**5-chloro-7-nitro-2-phenyl-1-(3-phenylprop-2-yn-1-yl)-1H-indole 7a:** 73 % yield; yellow - orange solid; mp 152 - 153  $^{\circ}\text{C}$ ;  $^1\text{H}$  NMR (400.13 MHz) ( $\text{CDCl}_3$ ):  $\delta$  7.92 (d,  $J$  = 1.9 Hz, 1 H), 7.88 (d,  $J$  = 1.9 Hz, 1 H), 7.61 - 7.52 (m, 5 H), 7.32 - 7.22 (m, 5 H), 6.72 (s, 1 H), 5.26 (s, 2 H);  $^{13}\text{C}$  NMR (100.6 MHz) ( $\text{CDCl}_3$ ):  $\delta$  146.8 (C), 137.5 (C), 134.2 (C), 131.7 (CH), 130.8 (C), 129.6 (CH), 129.3 (CH), 129.0 (CH), 128.7 (CH), 128.2 (CH), 127.1 (C), 125.9 (CH), 125.0 (C), 121.7 (C), 119.7 (CH), 103.9 (CH), 86.1 (C), 82.2 (C), 38.1 ( $\text{CH}_2$ ).

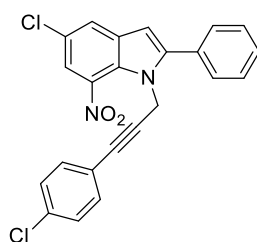

**5-chloro-1-(3-(4-chlorophenyl)prop-2-yn-1-yl)-7-nitro-2-phenyl-1H-indole 7b:** 73 % yield; orange solid; mp 109 - 110  $^{\circ}\text{C}$ ;  $^1\text{H}$  NMR (400.13 MHz) ( $\text{CDCl}_3$ ):  $\delta$  7.91 (d,  $J$  = 1.7 Hz, 1 H), 7.88 (d,  $J$  = 1.7 Hz, 1 H), 7.62 - 7.50 (m, 5 H), 7.26 - 7.17 (m, 4 H), 6.72 (s, 1 H), 5.24 (s, 2 H);  $^{13}\text{C}$  NMR (100.6 MHz) ( $\text{CDCl}_3$ ):  $\delta$  146.8 (C), 137.4 (C), 134.9 (C), 134.2 (C), 133.0 (CH), 130.7 (C), 129.6 (CH), 129.4 (CH), 129.0 (CH), 128.6 (CH), 127.1 (C), 126.0 (CH), 125.1 (C), 120.2 (C), 119.7 (CH), 103.9 (CH), 85.1 (C), 83.3 (C), 38.0 ( $\text{CH}_2$ ).

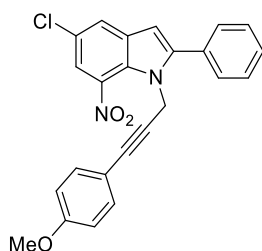

**5-chloro-1-(3-(4-methoxyphenyl)prop-2-yn-1-yl)-7-nitro-2-phenyl-1H-indole 7c:** 70 % yield; yellow solid; mp 133 - 134 °C;  $^1\text{H}$  NMR (400.13 MHz) ( $\text{CDCl}_3$ ):  $\delta$  7.91 (d,  $J$  = 1.9 Hz, 1 H), 7.87 (d,  $J$  = 1.9 Hz, 1 H), 7.60 - 7.50 (m, 5 H), 7.21 (d,  $J$  = 8.8 Hz, 2 H), 6.78 (d,  $J$  = 8.8 Hz, 2 H), 6.70 (s, 1 H), 5.23 (s, 2 H), 3.78 (s, 3 H);  $^{13}\text{C}$  NMR (100.6 MHz) ( $\text{CDCl}_3$ ):  $\delta$  159.9 (C), 146.7 (C), 138.2 (C), 137.5 (C), 134.2 (C), 133.2 (CH), 130.8 (C), 129.6 (CH), 129.3 (CH), 129.0 (CH), 127.1 (C), 125.8 (CH), 124.9 (C), 119.6 (CH), 113.8 (CH), 103.8 (CH), 86.1 (C), 80.9 (C), 55.2 ( $\text{CH}_3$ ), 38.2 ( $\text{CH}_2$ ).

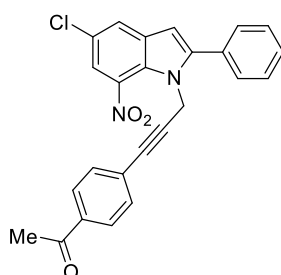

**1-(4-(3-(5-chloro-7-nitro-2-phenyl-1H-indol-1-yl)prop-1-yn-1-yl)phenyl)ethan-1-one 7d:** 52 % yield; brown solid; mp 133 - 134 °C;  $^1\text{H}$  NMR (400.13 MHz) ( $\text{CDCl}_3$ ):  $\delta$  7.92 (d,  $J$  = 1.9 Hz, 1 H), 7.90 (d,  $J$  = 1.9 Hz, 1 H), 7.84 (d,  $J$  = 8.5 Hz, 2 H), 7.60 - 7.53 (m, 5 H), 7.36 (d,  $J$  = 8.5 Hz, 2 H), 6.73 (s, 1 H), 5.27 (s, 2 H), 2.58 (s, 3 H);  $^{13}\text{C}$  NMR (100.6 MHz) ( $\text{CDCl}_3$ ):  $\delta$  197.2 (C), 146.8 (C), 137.4 (C), 136.6 (C), 134.2 (C), 131.9 (CH), 130.6 (C), 129.6 (CH), 129.4 (CH), 129.1 (CH), 128.1 (CH), 127.1 (C), 126.5 (C), 126.0 (CH), 125.2 (C), 119.7 (CH), 104.0 (CH), 85.4 (C), 85.3 (C), 38.0 ( $\text{CH}_2$ ), 26.6 ( $\text{CH}_3$ ).

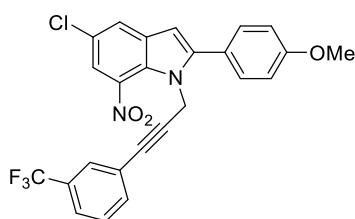

**5-chloro-2-(4-methoxyphenyl)-7-nitro-1-(3-(3-(trifluoromethyl)phenyl)prop-2-yn-1-yl)-1H-indole 7e:** 47 % yield; yellow - orange solid; mp 86 - 87 °C;  $^1\text{H}$  NMR (400.13 MHz) ( $\text{CDCl}_3$ ):  $\delta$  7.90 (d,  $J$  = 1.8 Hz, 1 H), 7.87 (d,  $J$  = 1.8 Hz, 1 H), 7.57 - 7.44 (m, 5 H), 7.40 (t,  $J$  = 7.6 Hz, 1 H), 7.10 (d,  $J$  = 8.6 Hz, 2 H), 6.67 (s, 1 H), 5.24 (s, 2 H), 3.92 (s, 3 H);  $^{13}\text{C}$  NMR (100.6 MHz) ( $\text{CDCl}_3$ ):  $\delta$  160.5 (C), 146.7 (C), 137.3 (C), 135.0 (CH), 134.3 (C), 131.0 (CH), 130.8 (q,  $J_{\text{CF}}$  = 33 Hz, C), 128.8 (CH), 128.5 (q,  $J_{\text{CF}}$  = 4.0 Hz, CH), 126.9 (C), 125.7 (CH), 125.3 (q,  $J_{\text{CF}}$  = 4.0 Hz, CH), 125.1 (C), 123.5 (q,  $J_{\text{CF}}$  = 273 Hz, C), 122.9 (C), 122.7 (C), 119.4 (CH), 114.5 (CH), 103.4 (CH), 84.4 (C), 84.0 (C), 55.4 ( $\text{CH}_3$ ), 37.8 ( $\text{CH}_2$ );  $^{19}\text{F}$  NMR (376.5 MHz) ( $\text{CDCl}_3$ ):  $\delta$  -63.0.

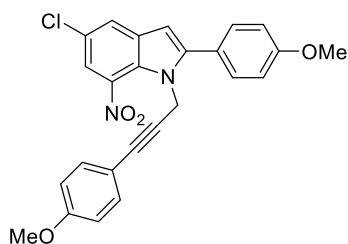

**5-chloro-2-(4-methoxyphenyl)-1-(3-(4-methoxyphenyl)prop-2-yn-1-yl)-7-nitro-1H-indole 7f:** 60 % yield; yellow - orange solid; mp 112 - 113 °C;  $^1\text{H}$  NMR (400.13 MHz) ( $\text{CDCl}_3$ ):  $\delta$  7.86 (d,  $J$  = 1.8 Hz, 1 H), 7.85 (d,  $J$  = 1.8 Hz, 1 H), 7.50 (d,  $J$  = 8.6 Hz, 2 H), 7.22 (d,  $J$  = 8.6 Hz, 2 H), 7.08 (d,  $J$  = 8.7 Hz, 2 H), 6.78 (d,  $J$  = 8.7 Hz, 2 H), 6.64 (s, 1 H), 5.20 (s, 2H), 3.92 (s, 3H), 3.78 (s, 3H);  $^{13}\text{C}$  NMR (100.6 MHz) ( $\text{CDCl}_3$ ):  $\delta$  160.4 (C), 159.9 (C), 146.7 (C), 137.4 (C), 134.3 (C), 133.2 (CH), 131.0 (CH), 127.0 (C), 125.6 (CH), 124.9 (C), 123.1 (C), 119.3 (CH), 114.5 (CH), 113.9 (C), 113.8 (CH), 103.2 (CH), 86.0 (C), 81.1 (C), 55.5 ( $\text{CH}_3$ ), 55.2 ( $\text{CH}_3$ ), 38.1 ( $\text{CH}_2$ ).

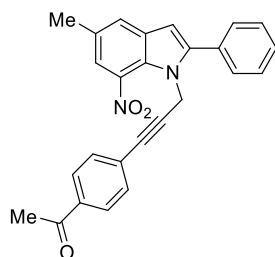

**1-(4-(3-(5-methyl-7-nitro-2-phenyl-1H-indol-1-yl)prop-1-yn-1-yl)phenyl)ethan-1-one 7g:** 73 % yield; yellow solid; mp 109 - 110 °C;  $^1\text{H}$  NMR (400.13 MHz) ( $\text{CDCl}_3$ ):  $\delta$  7.72 (d,  $J$  = 8.5 Hz, 2 H), 7.69 (s, 1 H), 7.63 (s, 1 H), 7.52 - 7.38 (m, 5 H), 7.22 (d,  $J$  = 8.5 Hz, 2 H), 6.60 (s, 1 H), 5.18 (s, 2 H), 2.47 (s, 3 H), 2.44 (s, 3 H);  $^{13}\text{C}$  NMR (100.6 MHz) ( $\text{CDCl}_3$ ):  $\delta$  197.3 (C), 145.5 (C), 137.2 (C), 136.5 (C), 133.6 (C), 131.9 (CH), 131.3 (C), 129.8 (C), 129.6 (CH), 129.0 (CH), 128.9 (CH), 128.0 (CH), 127.3 (C), 127.0 (CH), 126.9 (C), 121.1 (CH), 104.1 (CH), 86.1 (C), 84.8 (C), 38.4 ( $\text{CH}_2$ ), 26.7 ( $\text{CH}_3$ ), 20.9 ( $\text{CH}_3$ ).

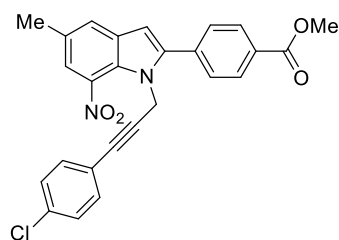

**methyl 4-(1-(3-(4-chlorophenyl)prop-2-yn-1-yl)-5-methyl-7-nitro-1H-indol-2-yl)benzoate 7h:** 58 % yield; yellow solid; mp 150 - 151 °C;  $^1\text{H}$  NMR (400.13 MHz) ( $\text{CDCl}_3$ ):  $\delta$  8.21 (d,  $J$  = 8.5 Hz, 2 H), 7.80 (s, 1 H), 7.73 (s, 1 H), 7.66 (d,  $J$  = 8.5 Hz, 2 H), 7.23 - 7.17 (m, 4 H), 6.76 (s, 1 H), 5.23 (s, 2 H), 4.00 (s, 3 H), 2.53 (s, 3 H);  $^{13}\text{C}$  NMR (100.6 MHz) ( $\text{CDCl}_3$ ):  $\delta$  166.5 (C), 144.3 (C), 137.3 (C), 135.6 (C), 134.7 (C), 133.4 (C), 133.0 (CH), 130.2 (C), 130.16 (CH), 130.13 (C), 129.4 (CH), 128.5 (CH), 127.8 (C), 127.2 (CH), 121.6 (CH), 120.3 (C), 105.1 (CH), 84.8 (C), 83.4 (C), 52.4 (CH), 38.0 ( $\text{CH}_2$ ), 20.8 ( $\text{CH}_3$ ).

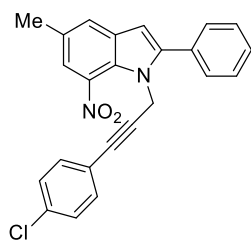

**1-(3-(4-chlorophenyl)prop-2-yn-1-yl)-5-methyl-7-nitro-2-phenyl-1H-indole 7i:** 63 % yield; yellow-orange solid; mp 122 - 123 °C;  $^1\text{H}$  NMR (400.13 MHz) ( $\text{CDCl}_3$ ):  $\delta$  7.78 (s, 1 H), 7.72 (s, 1 H), 7.62 - 7.42 (m, 5 H), 7.24 - 7.17 (m, 4 H), 6.69 (s, 1 H), 5.24 (s, 2 H), 2.53 (s, 3 H);  $^{13}\text{C}$  NMR (100.6 MHz) ( $\text{CDCl}_3$ ):  $\delta$  145.5 (C), 137.2 (C), 134.6 (C), 133.5 (C), 133.0 (CH), 131.3 (C), 129.8 (C), 129.6 (CH), 128.96 (CH), 128.94 (CH), 128.5 (CH), 127.2 (C), 127.0 (CH), 121.1 (CH), 120.5 (C), 104.1 (CH), 84.6 (C), 83.8 (C), 37.8 ( $\text{CH}_2$ ), 20.8 ( $\text{CH}_3$ ).

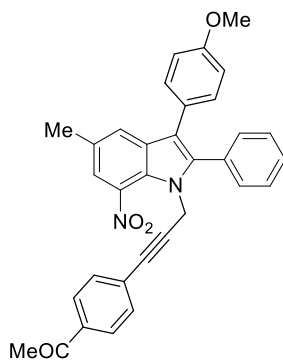

**1-(4-(3-(3-(4-methoxyphenyl)-5-methyl-7-nitro-2-phenyl-1H-indol-1-yl)prop-1-yn-1-yl)phenyl)ethan-1-one 14:** 92 % yield; yellow solid; mp: 200 - 202 °C;  $^1\text{H}$  NMR (400.13 MHz) ( $\text{CDCl}_3$ ):  $\delta$  7.85 (d,  $J$  = 8.3 Hz, 2 H), 7.81 (s, 1 H), 7.76 (s, 1 H), 7.49 - 7.35 (m, 7 H), 7.19 (d,  $J$  = 8.7 Hz, 2 H), 6.89 (d,  $J$  = 8.7 Hz, 2 H), 5.20 (s, 2 H), 3.83 (s, 3 H), 2.58 (s, 3 H), 2.52 (s, 3 H);  $^{13}\text{C}$  NMR (100.6 MHz) ( $\text{CDCl}_3$ ):  $\delta$  197.3 (C), 158.3 (C), 140.9 (C), 137.1 (C), 136.5 (C), 133.3 (C), 131.9 (CH), 131.2 (CH), 131.1 (CH), 129.8 (CH), 128.9 (CH), 128.8 (CH), 128.1 (C), 127.0 (C), 126.2 (C), 126.0 (CH), 125.7 (C), 121.4 (CH), 116.9 (C), 114.0 (CH), 104.1 (C), 86.3 (C), 84.8 (CH), 55.2 ( $\text{CH}_3$ ), 37.6 ( $\text{CH}_2$ ), 26.6 ( $\text{CH}_3$ ), 55.2 ( $\text{CH}_3$ ), 20.9 ( $\text{CH}_3$ ).

### 3.4 Characterization data of 2-aryl-1-(3-phenylprop-2-yn-1-yl)-1H-indol-7-amines 1

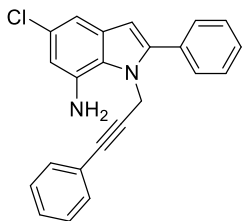

**5-chloro-2-phenyl-1-(3-phenylprop-2-yn-1-yl)-1H-indol-7-amine 1a:** 60% yield; brown oil;  $^1\text{H}$  NMR (400.13 MHz) ( $\text{CDCl}_3$ ):  $\delta$  7.68 (d,  $J$  = 8.8 Hz, 2 H), 7.56 - 7.43 (m, 5 H), 7.41 - 7.34 (m, 3 H), 7.01 (d,  $J$  = 1.6 Hz, 1 H), 6.47 (s, 1 H), 6.50 (d,  $J$  = 1.6 Hz, 1 H), 5.19 (s, 2 H), 4.33 (bs, 2 H);  $^{13}\text{C}$  NMR (100.6 MHz) ( $\text{CDCl}_3$ ):  $\delta$  143.2 (C), 134.0 (C), 131.8 (C), 131.7 (CH), 130.9 (C), 129.3 (CH), 129.0 (CH), 128.8 (CH), 128.49 (CH), 128.43 (CH), 127.2 (C), 126.4 (C), 121.8 (C), 111.4 (CH), 110.3 (CH), 102.5 (CH), 86.5 (C), 86.2 (C), 36.5 ( $\text{CH}_2$ ).

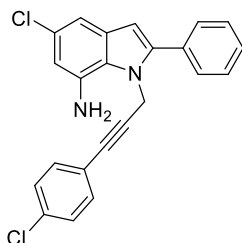

**5-chloro-1-(3-(4-chlorophenyl)prop-2-yn-1-yl)-2-phenyl-1H-indol-7-amine 1b:** 55% yield; yellow - orange solid; mp 109 - 110  $^\circ\text{C}$ ;  $^1\text{H}$  NMR (400.13 MHz) ( $\text{CDCl}_3$ ):  $\delta$  7.60 - 7.64 (m, 2 H), 7.56 - 7.45 (m, 3 H), 7.41 (d,  $J$  = 8.6 Hz, 2 H), 7.34 (d,  $J$  = 8.6 Hz, 2 H), 7.11 (d,  $J$  = 1.9 Hz, 1 H), 6.56 (d,  $J$  = 1.9 Hz, 1 H), 6.48 (s, 1 H), 5.19 (s, 2 H), 4.27 (bs, 2 H);  $^{13}\text{C}$  NMR (100.6 MHz) ( $\text{CDCl}_3$ ):  $\delta$  143.3 (C), 135.1 (C), 133.9 (C), 132.9 (CH), 131.8 (C), 130.9 (C), 129.3 (CH), 128.87 (CH), 128.83 (CH), 128.5 (CH), 127.2 (C), 126.5 (C), 120.3 (C), 111.6 (CH), 110.5 (CH), 102.7 (CH), 87.2 (C), 85.4 (C), 36.4 ( $\text{CH}_2$ ).

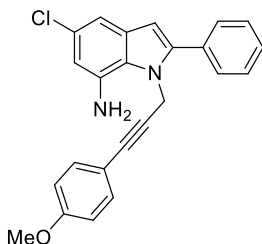

**5-chloro-1-(3-(4-methoxyphenyl)prop-2-yn-1-yl)-2-phenyl-1H-indol-7-amine 1c:** 85 % yield; yellow-orange solid; mp 91 - 92  $^\circ\text{C}$ ;  $^1\text{H}$  NMR (400.13 MHz) ( $\text{CDCl}_3$ ):  $\delta$  7.69 (d,  $J$  = 7.2 Hz, 2 H), 7.52 (t,  $J$  = 7.5 Hz, 2 H), 7.48 - 7.40 (m, 3 H), 6.99 (d,  $J$  = 1.8 Hz, 1 H), 7.00 (d,  $J$  = 1.9 Hz, 1 H), 6.89 (d,  $J$  = 8.8 Hz, 2 H), 6.55 (d,  $J$  = 1.9 Hz, 1 H), 6.46 (s, 1 H), 5.17 (s, 2 H), 4.35 (bs, 2 H), 3.8 (s, 3 H);  $^{13}\text{C}$  NMR (100.6 MHz) ( $\text{CDCl}_3$ ):  $\delta$  160.1 (C), 143.2 (C), 134.0 (C), 133.2 (CH), 131.9 (C), 130.8 (C), 129.3 (CH), 128.7 (CH), 128.3 (CH), 127.1 (C), 126.3 (C), 114.1 (CH), 113.8 (C), 111.3 (CH), 110.1 (CH), 102.4 (CH), 86.6 (C), 84.9 (C), 55.3 ( $\text{CH}_3$ ), 36.6 ( $\text{CH}_2$ ).

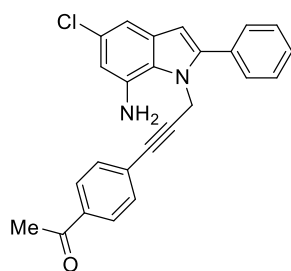

**1-(4-(3-(7-amino-5-chloro-2-phenyl-1H-indol-1-yl)prop-1-yn-1-yl)phenyl)ethan-1-one 1d:** 81 % yield; brown solid; mp 80 - 81 °C;  $^1\text{H}$  NMR (400.13 MHz) (DMSO  $d_6$ ):  $\delta$  7.90 (d,  $J_1 = 8.4$  Hz, 2 H), 7.60 (d,  $J = 7.6$  Hz, 2 H), 7.55 (t,  $J = 7.5$  Hz, 2 H), 7.48- 7.44 (m, 3 H), 6.71 (s, 1 H), 6.46 (s, 1 H), 6.40 (d,  $J = 1.1$  Hz, 1 H), 5.31 (s, 2 H), 4.89 (bs, 2 H), 2.55 (s, 3 H);  $^{13}\text{C}$  NMR (100.6 MHz) (DMSO  $d_6$ ):  $\delta$  197.7 (C), 142.7 (C), 136.8 (C), 134.9 (C), 132.6 (C), 132.1 (CH), 131.0 (C), 130.5 (C), 129.4 (CH), 129.2 (CH), 128.9 (CH), 128.8 (CH), 127.6 (C), 126.7 (C), 112.2 (CH), 110.8 (CH), 104.4 (CH), 90.2 (C), 84.0 (C), 36.3 (CH<sub>2</sub>), 27.2 (CH<sub>3</sub>).

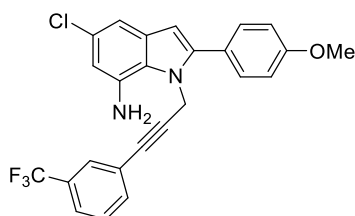

**5-chloro-2-(4-methoxyphenyl)-1-(3-(3-(trifluoromethyl)phenyl)prop-2-yn-1-yl)-1H-indol-7-amine 1e:** 93 % yield; brown solid; mp 101 - 102 °C;  $^1\text{H}$  NMR (400.13 MHz) (CDCl<sub>3</sub>):  $\delta$  7.73 (s, 1 H), 7.67 - 7.61 (m, 2 H), 7.58 (d,  $J = 8.6$  Hz, 2 H), 7.5 (t,  $J = 7.8$  Hz, 1 H), 7.09 (d,  $J = 1.5$  Hz, 1 H), 7.06 (d,  $J = 8.6$  Hz, 2 H), 6.55 (d,  $J = 1.5$  Hz, 1 H), 6.42 (s, 1 H), 5.20 (s, 2 H), 4.21 (bs, 2 H), 3.90 (s, 3 H);  $^{13}\text{C}$  NMR (100.6 MHz) (CDCl<sub>3</sub>):  $\delta$  159.9 (C), 143.2 (C), 134.9 (CH), 133.7 (C), 131.2 (q,  $J_{CF} = 32$  Hz, C), 131.0 (C), 130.7 (CH), 129.1 (CH), 128.5 (q,  $J_{CF} = 4$  Hz, CH), 127.0 (C), 126.4 (C), 125.8 (q,  $J_{CF} = 4$  Hz, CH), 124.1 (C), 123.5 (q,  $J_{CF} = 273$  Hz, C), 122.8 (CH), 114.3 (CH), 111.5 (CH), 110.4 (CH), 102.1 (CH), 87.9 (C), 84.7 (C), 55.4 (CH<sub>3</sub>), 36.3 (CH<sub>2</sub>);  $^{19}\text{F}$  NMR (376.5 MHz) (CDCl<sub>3</sub>):  $\delta$  -62.6.

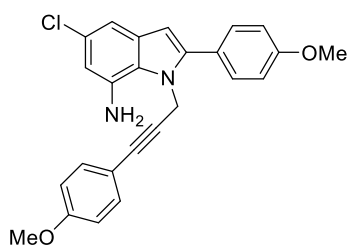

**5-chloro-2-(4-methoxyphenyl)-1-(3-(4-methoxyphenyl)prop-2-yn-1-yl)-1H-indol-7-amine 1f:** 95 % yield; brown solid; mp 105 - 106 °C;  $^1\text{H}$  NMR (400.13 MHz) (CDCl<sub>3</sub>):  $\delta$  7.61 (d,  $J = 8.6$  Hz, 2 H), 7.42 (d,  $J = 8.4$  Hz, 2 H), 7.09 - 7.02 (m, 3 H), 6.88 (d,  $J = 8.4$  Hz, 2 H), 6.52 (d,  $J = 1.4$  Hz, 2 H), 6.39 (s, 1 H), 5.15 (s, 2 H), 4.33 (bs, 2 H), 3.89 (s, 3 H), 3.85 (s, 3 H);  $^{13}\text{C}$  NMR (100.6 MHz) (CDCl<sub>3</sub>):  $\delta$  160.1 (C), 159.8 (C), 143.1 (C), 134.0 (C), 133.2 (CH), 130.9 (C), 130.6 (CH), 126.9 (C), 126.2 (C), 124.3 (C), 120.4 (C), 114.2 (CH), 114.1 (CH), 111.2 (CH), 109.9 (CH), 101.7 (CH), 86.4 (C), 85.0 (C), 55.4 (CH<sub>3</sub>), 55.3 (CH<sub>2</sub>), 36.5 (CH<sub>2</sub>).



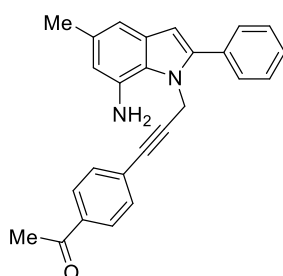

**1-(4-(3-(7-amino-5-methyl-2-phenyl-1H-indol-1-yl)prop-1-yn-1-yl)phenyl)ethan-1-one 1g:** 70 % yield; yellow - orange solid; mp 83 - 84 °C; <sup>1</sup>H NMR (400.13 MHz, CDCl<sub>3</sub>) δ 7.84 (d, *J* = 8.2 Hz, 2H), 7.58 (d, *J* = 7.3 Hz, 2H), 7.50–7.30 (m, 5H), 6.85 (s, 1H), 6.38–6.35 (m, 2H), 5.15 (s, 2H), 4.04 (s, 2H), 2.53 (s, 3H), 2.29 (s, 3H); <sup>13</sup>C NMR (100.6 MHz) (CDCl<sub>3</sub>): δ 197.2 (C), 142.4 (C), 136.7 (C), 132.5 (C), 132.4 (C), 131.9 (CH), 131.0 (C), 130.7 (C), 129.3 (CH), 128.7 (CH), 128.3 (CH), 128.1 (CH), 127.4 (C), 126.9 (C), 112.4 (CH), 112.3 (CH), 102.9 (CH), 90.0 (C), 85.2 (C), 36.5 (CH<sub>2</sub>), 26.7 (CH<sub>3</sub>), 21.3 (CH<sub>3</sub>).

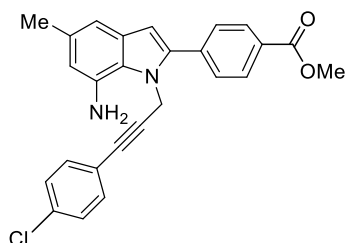

**methyl 4-(7-amino-1-(3-(4-chlorophenyl)prop-2-yn-1-yl)-5-methyl-1H-indol-2-yl)benzoate 1h:** 63 % yield; red wax; <sup>1</sup>H NMR (400.13 MHz) (CDCl<sub>3</sub>): δ 8.08 (d, *J* = 8.5 Hz, 2H), 7.67 (d, *J* = 8.5 Hz, 2H), 7.28 (m, 4H), 6.85 (s, 1H), 6.46 (s, 1H), 6.36 (d, *J* = 1.0 Hz, 1H), 5.10 (s, 2H), 4.06 (s, 2H), 3.88 (s, 3H), 2.29 (s, 3H); <sup>13</sup>C NMR (100.6 MHz, CDCl<sub>3</sub>) δ 166.8 (C), 141.3 (C), 136.8 (C), 135.1 (C), 133.0 (CH), 132.7 (C), 131.2 (C), 130.5 (C), 130.0 (CH), 129.4 (C), 128.9 (CH), 128.9 (CH), 128.1 (C), 120.4 (C), 112.8 (CH), 112.4 (CH), 104.0 (CH), 87.4 (C), 85.3 (C), 52.3 (CH<sub>3</sub>), 36.6 (CH<sub>2</sub>), 21.3 (CH<sub>3</sub>).

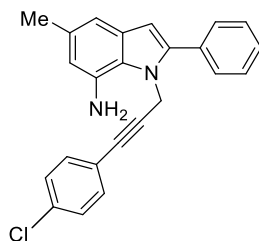

**1-(3-(4-chlorophenyl)prop-2-yn-1-yl)-5-methyl-2-phenyl-1H-indol-7-amine 1i:** 57 % yield; brown wax; <sup>1</sup>H NMR (400.13 MHz) (CDCl<sub>3</sub>): δ 7.57 (d, *J* = 8.0 Hz, 2H), 7.40 (t, *J* = 8.0, 7.0 Hz, 2H), 7.37–7.27 (m, 3H), 7.23 (d, *J* = 8.5 Hz, 2H), 6.84 (s, 1H), 6.37–6.33 (m, 1H), 5.10 (s, 2H), 4.05 (s, 2H), 2.28 (s, 3H); <sup>13</sup>C NMR (100.6 MHz) (CDCl<sub>3</sub>): δ 142.3 (C), 135.0 (C), 133.0 (CH), 132.6 (C), 132.5 (C), 130.9 (C), 130.6 (C), 129.3 (CH), 128.8 (CH), 128.7 (CH), 128.1 (CH), 127.4 (C), 120.6 (C), 112.3 (CH), 112.2 (CH), 102.7 (CH), 87.8 (C), 85.0 (C), 36.4 (CH<sub>2</sub>), 21.3 (CH<sub>3</sub>).

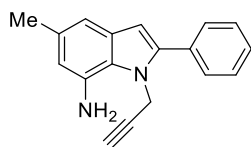

**5-methyl-2-phenyl-1-(prop-2-yn-1-yl)-1H-indol-7-amine 1j:** 43 % yield; brown wax;  $^1\text{H}$  NMR (400.13 MHz) ( $\text{CDCl}_3$ ):  $\delta$  7.55 (d,  $J$  = 7.1 Hz, 2H), 7.42–7.31 (m, 3H), 6.83 (s, 1H), 6.35 - 6.33 (m, 2H), 4.89 (d,  $J$  = 2.4 Hz, 2H), 4.00 (s, 2H), 2.52 (t,  $J$  = 2.4 Hz, 1H), 2.28 (s, 3H).  $^{13}\text{C}$  NMR (100.6 MHz) ( $\text{CDCl}_3$ ): 142.4 (C), 132.5 (C), 132.4 (C), 130.9 (C), 130.6 (C), 129.3 (CH), 128.7 (CH), 128.1 (CH), 112.4 (CH), 112.3 (CH), 102.8 (CH), 81.9 (C), 74.4 (C), 35.7 ( $\text{CH}_2$ ), 21.3 ( $\text{CH}_3$ ).

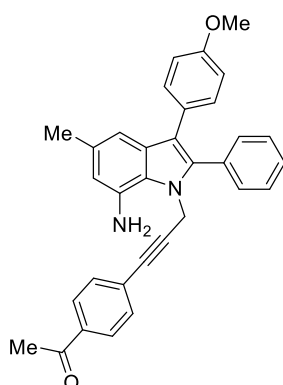

**1-(4-(3-(7-amino-3-(4-methoxyphenyl)-5-methyl-2-phenyl-1H-indol-1-yl)prop-1-yn-1-yl)phenyl)ethan-1-one 1k:** 57 % yield; brown wax;  $^1\text{H}$  NMR (400.13 MHz) ( $\text{CDCl}_3$ ):  $\delta$  7.84 (d,  $J$  = 8.4 Hz, 2H), 7.45 (d,  $J$  = 8.4 Hz, 2H), 7.38–7.29 (m, 5H), 7.12 (d,  $J$  = 8.7 Hz, 2H), 6.93 (s, 1H), 6.76 (d,  $J$  = 8.8 Hz, 2H), 6.40 (s, 1H), 5.10 (s, 2H), 4.05 (m, 2H), 3.72 (s, 3H), 2.53 (s, 3H), 2.28 (s, 3H);  $^{13}\text{C}$  NMR (100.6 MHz) ( $\text{CDCl}_3$ ):  $\delta$  197.2 (C), 157.7 (C), 138.1 (C), 136.7 (C), 132.5 (C), 131.9 (CH), 131.5 (C), 131.3 (CH), 131.1 (CH), 130.1 (C), 128.5 (CH), 128.3 (CH), 128.1 (CH), 127.5 (C), 127.0 (C), 126.3 (C), 115.8 (C), 113.7 (CH), 112.9 (CH), 111.3 (CH), 89.9 (C), 85.0 (C), 55.2 ( $\text{CH}_3$ ), 36.3 ( $\text{CH}_2$ ), 26.7 ( $\text{CH}_3$ ), 21.4 ( $\text{CH}_3$ ).

#### 4. REFERENCES

[1] Sanz R., Guilarte V., Pérez A., Straightforward selective preparation of nitro- or amino-indoles from 2-halonitroanilines and alkynes. First synthesis of 7-amino-5-nitroindoles, *Tetrahedron Lett.*, **2009**, 50, 4423-4426, doi.org/10.1016/j.tetlet.2009.05.027.

## 5. HF CALCULATION ON ISOMERS 2a and 2'a

### Compound 2a

```
+-----+
---+
| Jaguar version 3.5, release 42
|
|
| Copyright 1991-1998 Schrodinger, Inc.
|
| All Rights Reserved.
|
|
| Use of this program should be acknowledged in publications
as: |
| Jaguar 3.5, Schrodinger, Inc., Portland, Oregon, 1998.
|
+-----+
-----+
```

```
start of program pre
Job name: WF3654
Executables used: D:\TITAN
Temporary files : C:\Users\gfabr\AppData\Local\Temp\WF3654
```

```
Input file comments:
Molecule001
This file created by Spartan
```

```
basis set:          6-31G**
net molecular charge: 0
multiplicity:       1
```

```
number of basis functions....          465
```

Input geometry:

|      | angstroms     |               |               |
|------|---------------|---------------|---------------|
| atom | x             | y             | z             |
| N1   | -0.1550260000 | 0.4374990000  | 1.1210390000  |
| N2   | -1.0086730000 | -2.3256400000 | 1.1332130000  |
| C4   | -1.1860510000 | -0.0350800000 | 1.9315790000  |
| C5   | -0.0104550000 | -1.9237530000 | 0.4028750000  |
| C6   | -1.6456290000 | -1.3760560000 | 1.9632780000  |
| C7   | -1.7070180000 | 1.0262900000  | 2.7388420000  |
| C13  | 0.7199200000  | -2.8803430000 | -0.5063790000 |
| H4   | -3.1185930000 | -2.6496450000 | 2.9223950000  |
| C8   | -2.7656460000 | 0.7093510000  | 3.5969080000  |
| C11  | -0.9132890000 | 2.1852800000  | 2.3994340000  |

|     |               |               |               |
|-----|---------------|---------------|---------------|
| H7  | -3.2133600000 | 1.4833470000  | 4.2359600000  |
| C9  | -3.2381490000 | -0.5972350000 | 3.6279590000  |
| H8  | -4.0721010000 | -0.8455450000 | 4.3029390000  |
| C10 | -2.7017240000 | -1.6349910000 | 2.8394980000  |
| C12 | 0.0268720000  | 1.8011420000  | 1.4273890000  |
| C2  | 1.0263770000  | 2.6560040000  | 0.8075810000  |
| H13 | 1.8204060000  | -2.6663390000 | -0.4286580000 |
| C14 | 0.2610050000  | -2.7449900000 | -1.9177470000 |
| H15 | 0.5612370000  | -3.9425620000 | -0.1705390000 |
| C15 | -0.5895550000 | -2.5433530000 | -4.5760680000 |
| C16 | 1.1246910000  | -2.2456410000 | -2.8988340000 |
| C17 | -1.0320590000 | -3.1444790000 | -2.2771670000 |
| C18 | -1.4542200000 | -3.0419090000 | -3.6012120000 |
| C19 | 0.6998040000  | -2.1465450000 | -4.2231290000 |
| H16 | 2.1442750000  | -1.9343460000 | -2.6271240000 |
| H17 | -1.7134540000 | -3.5365780000 | -1.5059970000 |
| H18 | -2.4719630000 | -3.3556810000 | -3.8767030000 |
| H19 | 1.3846780000  | -1.7555640000 | -4.9897570000 |
| H20 | -0.9239070000 | -2.4642400000 | -5.6207450000 |
| C1  | 0.5776390000  | -0.5062530000 | 0.3222060000  |
| H5  | 1.6528730000  | -0.5444960000 | 0.6633050000  |
| H6  | 0.5619750000  | -0.1829560000 | -0.7593680000 |
| C3  | 2.9246780000  | 4.3652120000  | -0.3378590000 |
| C26 | 1.7455110000  | 3.5549090000  | 1.6101580000  |
| C27 | 1.2625130000  | 2.6251890000  | -0.5732690000 |
| C28 | 2.2088580000  | 3.4770190000  | -1.1402160000 |
| C29 | 2.6895760000  | 4.4036320000  | 1.0366540000  |
| H1  | 1.5580180000  | 3.5843390000  | 2.6943120000  |
| H2  | 0.6891520000  | 1.9402470000  | -1.2156630000 |
| H3  | 2.3868000000  | 3.4502800000  | -2.2254160000 |
| H9  | 3.2505630000  | 5.1053430000  | 1.6714530000  |
| H10 | 3.6710440000  | 5.0358360000  | -0.7881560000 |
| H25 | -1.0275920000 | 3.1833010000  | 2.8110280000  |

Molecular weight: 322.15 amu

Stoichiometry: C23N2H18

Molecular Point Group: C1

Point Group used: C1

nuclear repulsion energy..... 1952.777623249 hartrees

Non-default options chosen:

Geometry will be optimized in redundant internal coordinates

Initial Hessian: from previous calculation

end of program pre

start of program onee

smallest eigenvalue of S: 3.218E-04

number of canonical orbitals..... 462

end of program onee

start of program hfig  
 initial wavefunction generated automatically from atomic  
 wavefunctions

| Irreducible<br>representation<br>No Symm | Total no<br>orbitals<br>462 | No of occupied orbitals<br>Shell_1 Shell_2 ... |  |  |
|------------------------------------------|-----------------------------|------------------------------------------------|--|--|
| -----                                    |                             | 85                                             |  |  |
| Orbital occupation/shell                 |                             | 1.000                                          |  |  |

end of program hfig

start of program probe  
 end of program probe

start of program grid

| number of gridpoints: |     |     |     |     |     |     |     |
|-----------------------|-----|-----|-----|-----|-----|-----|-----|
| atom                  | N1  | N2  | C4  | C5  | C6  | C7  | C13 |
| H4                    |     |     |     |     |     |     |     |
| grid # 1              | 97  | 102 | 88  | 88  | 88  | 90  | 84  |
| 73                    |     |     |     |     |     |     |     |
| grid # 2              | 104 | 112 | 97  | 95  | 98  | 98  | 92  |
| 118                   |     |     |     |     |     |     |     |
| grid # 3              | 214 | 229 | 199 | 184 | 197 | 196 | 170 |
| 223                   |     |     |     |     |     |     |     |
| grid # 4              | 391 | 414 | 331 | 322 | 327 | 347 | 304 |
| 232                   |     |     |     |     |     |     |     |

| number of gridpoints: |     |     |     |     |     |     |     |
|-----------------------|-----|-----|-----|-----|-----|-----|-----|
| atom                  | C8  | C11 | H7  | C9  | H8  | C10 | C12 |
| C2                    |     |     |     |     |     |     |     |
| grid # 1              | 89  | 87  | 73  | 87  | 73  | 89  | 86  |
| 90                    |     |     |     |     |     |     |     |
| grid # 2              | 97  | 95  | 118 | 97  | 118 | 97  | 97  |
| 98                    |     |     |     |     |     |     |     |
| grid # 3              | 186 | 182 | 224 | 184 | 222 | 186 | 191 |
| 195                   |     |     |     |     |     |     |     |
| grid # 4              | 332 | 341 | 234 | 329 | 231 | 332 | 331 |
| 341                   |     |     |     |     |     |     |     |

| number of gridpoints: |     |     |     |     |     |     |     |
|-----------------------|-----|-----|-----|-----|-----|-----|-----|
| atom                  | H13 | C14 | H15 | C15 | C16 | C17 | C18 |
| C19                   |     |     |     |     |     |     |     |
| grid # 1              | 69  | 93  | 69  | 89  | 88  | 89  | 89  |
| 89                    |     |     |     |     |     |     |     |
| grid # 2              | 110 | 100 | 112 | 97  | 96  | 96  | 97  |
| 97                    |     |     |     |     |     |     |     |

|          |     |     |     |     |     |     |     |
|----------|-----|-----|-----|-----|-----|-----|-----|
| grid # 3 | 210 | 195 | 216 | 187 | 186 | 185 | 186 |
|----------|-----|-----|-----|-----|-----|-----|-----|

185

|          |     |     |     |     |     |     |     |
|----------|-----|-----|-----|-----|-----|-----|-----|
| grid # 4 | 215 | 342 | 223 | 331 | 330 | 331 | 331 |
|----------|-----|-----|-----|-----|-----|-----|-----|

330

number of gridpoints:

|      |     |     |     |     |     |    |    |
|------|-----|-----|-----|-----|-----|----|----|
| atom | H16 | H17 | H18 | H19 | H20 | C1 | H5 |
|------|-----|-----|-----|-----|-----|----|----|

H6

|          |    |    |    |    |    |    |    |
|----------|----|----|----|----|----|----|----|
| grid # 1 | 72 | 72 | 73 | 73 | 73 | 82 | 70 |
|----------|----|----|----|----|----|----|----|

69

|          |     |     |     |     |     |    |     |
|----------|-----|-----|-----|-----|-----|----|-----|
| grid # 2 | 112 | 114 | 118 | 118 | 118 | 90 | 112 |
|----------|-----|-----|-----|-----|-----|----|-----|

102

|          |     |     |     |     |     |     |     |
|----------|-----|-----|-----|-----|-----|-----|-----|
| grid # 3 | 214 | 217 | 224 | 223 | 224 | 167 | 216 |
|----------|-----|-----|-----|-----|-----|-----|-----|

205

|          |     |     |     |     |     |     |     |
|----------|-----|-----|-----|-----|-----|-----|-----|
| grid # 4 | 221 | 223 | 232 | 231 | 232 | 299 | 217 |
|----------|-----|-----|-----|-----|-----|-----|-----|

206

number of gridpoints:

|      |    |     |     |     |     |    |    |
|------|----|-----|-----|-----|-----|----|----|
| atom | C3 | C26 | C27 | C28 | C29 | H1 | H2 |
|------|----|-----|-----|-----|-----|----|----|

H3

|          |    |    |    |    |    |    |    |
|----------|----|----|----|----|----|----|----|
| grid # 1 | 89 | 89 | 88 | 89 | 89 | 72 | 71 |
|----------|----|----|----|----|----|----|----|

73

|          |    |    |    |    |    |     |     |
|----------|----|----|----|----|----|-----|-----|
| grid # 2 | 97 | 96 | 96 | 97 | 97 | 115 | 111 |
|----------|----|----|----|----|----|-----|-----|

118

|          |     |     |     |     |     |     |     |
|----------|-----|-----|-----|-----|-----|-----|-----|
| grid # 3 | 187 | 184 | 186 | 186 | 186 | 218 | 212 |
|----------|-----|-----|-----|-----|-----|-----|-----|

224

|          |     |     |     |     |     |     |     |
|----------|-----|-----|-----|-----|-----|-----|-----|
| grid # 4 | 332 | 330 | 330 | 329 | 330 | 224 | 217 |
|----------|-----|-----|-----|-----|-----|-----|-----|

232

number of gridpoints:

|          |     |     |     |       |
|----------|-----|-----|-----|-------|
| atom     | H9  | H10 | H25 | total |
| grid # 1 | 73  | 73  | 72  | 3521  |
| grid # 2 | 118 | 118 | 115 | 4498  |
| grid # 3 | 224 | 224 | 219 | 8672  |
| grid # 4 | 232 | 232 | 222 | 12443 |

end of program grid

start of program rwr  
end of program rwr

start of program scf

|                               |     |
|-------------------------------|-----|
| number of electrons.....      | 170 |
| number of alpha electrons.... | 85  |
| number of beta electrons..... | 85  |
| number of orbitals, total.... | 462 |
| number of core orbitals.....  | 85  |
| number of open shell orbs.... | 0   |
| number of occupied orbitals.. | 85  |
| number of virtual orbitals... | 377 |

```

number of hamiltonians..... 1
number of shells..... 1
SCF type: HF

```

|      | i  | u | d | i | g |                  |          | RMS     | maximum |
|------|----|---|---|---|---|------------------|----------|---------|---------|
|      | t  | p | i | c | r |                  |          | density | DIIS    |
|      | e  | d | i | u | i |                  | energy   | change  | error   |
|      | r  | t | s | t | d | total energy     | change   |         |         |
| etot | 1  | N | N | 5 | M | -987.21080013367 |          | 3.9E-03 | 9.8E-02 |
| etot | 2  | Y | Y | 6 | M | -989.98476104696 | 2.8E+00  | 1.7E-03 | 5.5E-02 |
| etot | 3  | Y | Y | 6 | M | -990.27640419982 | 2.9E-01  | 7.8E-04 | 2.7E-02 |
| etot | 4  | N | Y | 2 | U | -990.34536478481 | 6.9E-02  | 3.8E-04 | 1.5E-02 |
| etot | 5  | Y | Y | 6 | M | -990.35620931742 | 1.1E-02  | 1.0E-03 | 1.0E-02 |
| etot | 6  | N | Y | 2 | U | -990.36578188544 | 9.6E-03  | 1.2E-04 | 2.2E-03 |
| etot | 7  | Y | Y | 6 | M | -990.36633784606 | 5.6E-04  | 4.0E-05 | 5.6E-04 |
| etot | 8  | Y | Y | 6 | M | -990.36641184175 | 7.4E-05  | 1.2E-05 | 2.3E-04 |
| etot | 9  | N | Y | 2 | U | -990.36623705176 | -1.7E-04 | 5.8E-06 | 1.1E-04 |
| etot | 10 | Y | Y | 6 | M | -990.36624305181 | 6.0E-06  | 4.9E-06 | 5.8E-05 |
| etot | 11 | Y | N | 6 | M | -990.36624587679 | 2.8E-06  | 0.0E+00 | 0.0E+00 |

Energy components, in hartrees:

```

(A) Nuclear repulsion..... 1952.77762324898
(E) Total one-electron terms..... -5223.87627037117
(I) Total two-electron terms..... 2280.73240124540
(L) Electronic energy..... -2943.14386912577 (E+I)
(N) Total energy..... -990.36624587679 (A+L)

```

```

SCFE: SCF energy: HF      -990.36624587679 hartrees  iterations:
11

```

```

HOMO energy:      -0.26238
LUMO energy:       0.08458

```

Orbital energies:

```

-15.61225  -15.57394  -11.30699  -11.29988  -11.28257  -11.26176
-11.25976  -11.25489  -11.25065  -11.24883  -11.24706  -11.24570
-11.24527  -11.24438  -11.24359  -11.24267  -11.24138  -11.24124
-11.23937  -11.23733  -11.22956  -11.22835  -11.22767  -11.22333
-11.22233  -1.30891   -1.23521  -1.15989  -1.15811  -1.13132
-1.07044   -1.06879   -1.03483  -1.01840  -1.01489  -1.01367
-0.96165   -0.95090   -0.92391  -0.85859  -0.83575  -0.83045
-0.82627   -0.79990   -0.78600  -0.76574  -0.72486  -0.71505
-0.69233   -0.69090   -0.66232  -0.65281  -0.64039  -0.63511
-0.63125   -0.61793   -0.61598  -0.61045  -0.59401  -0.58832
-0.58652   -0.58354   -0.57683  -0.55347  -0.54722  -0.54082
-0.53565   -0.51410   -0.50599  -0.49981  -0.49872  -0.49409
-0.49103   -0.48832   -0.48378  -0.47850  -0.42632  -0.40843
-0.36790   -0.34360   -0.34155  -0.33783  -0.32751  -0.27573
-0.26238    0.08458    0.11895    0.13358    0.13414    0.14570

```

0.17403 0.20148 0.21421 0.22686 0.23450

end of program scf

start of program der1a  
end of program der1a

start of program rwr  
recomputing RwR matrix 2 grid: 4  
end of program rwr

start of program der1b

forces (hartrees/bohr) : total

| atom | label | x             | y             | z             |
|------|-------|---------------|---------------|---------------|
| 1    | N1    | -3.240872E-02 | 9.749688E-03  | 3.179943E-02  |
| 2    | N2    | 3.994841E-02  | 1.589784E-02  | -2.744144E-02 |
| 3    | C4    | -4.648588E-03 | 1.109702E-02  | 6.253104E-03  |
| 4    | C5    | -3.592959E-02 | -8.241299E-03 | 3.439027E-02  |
| 5    | C6    | 2.414258E-03  | 2.916011E-02  | 4.891493E-03  |
| 6    | C7    | 2.172547E-02  | -2.498377E-02 | -2.655680E-02 |
| 7    | C13   | 1.776470E-02  | -2.489095E-02 | 2.423915E-02  |
| 8    | H4    | 8.099431E-03  | 1.571016E-02  | -2.748483E-03 |
| 9    | C8    | -8.989727E-03 | 2.813047E-03  | 8.737148E-03  |
| 10   | C11   | 2.073446E-02  | -1.403474E-02 | -2.135011E-02 |
| 11   | H7    | 5.617432E-03  | -1.253712E-02 | -8.781297E-03 |
| 12   | C9    | -1.066947E-02 | 1.935235E-03  | 1.014118E-02  |
| 13   | H8    | 1.338669E-02  | 4.465009E-03  | -1.056642E-02 |
| 14   | C10   | 7.534698E-03  | -9.961889E-03 | -9.389467E-03 |
| 15   | C12   | -4.116184E-02 | -1.291056E-02 | 3.163420E-02  |
| 16   | C2    | 1.304881E-02  | 8.436034E-03  | -7.725578E-03 |
| 17   | H13   | -2.288695E-02 | -5.875229E-03 | -2.856836E-03 |
| 18   | C14   | -3.001289E-05 | 9.115626E-04  | -2.375293E-02 |
| 19   | H15   | 2.454104E-03  | 2.667852E-02  | -3.093814E-03 |
| 20   | C15   | -8.755934E-04 | 1.284549E-03  | -8.246274E-03 |
| 21   | C16   | 1.904926E-03  | 8.743392E-04  | -2.548369E-04 |
| 22   | C17   | -5.241454E-03 | -1.814770E-03 | 2.230640E-03  |
| 23   | C18   | -7.258278E-03 | -2.346623E-03 | -2.041341E-04 |
| 24   | C19   | 3.649640E-03  | 3.130199E-03  | -7.320720E-03 |
| 25   | H16   | -1.529594E-02 | -5.126618E-03 | -3.849080E-03 |
| 26   | H17   | 1.141142E-02  | 6.616599E-03  | -1.234182E-02 |
| 27   | H18   | 1.586235E-02  | 4.779575E-03  | 4.278800E-03  |
| 28   | H19   | -1.052798E-02 | -5.951830E-03 | 1.156894E-02  |
| 29   | H20   | 5.229882E-03  | -1.242672E-03 | 1.606278E-02  |
| 30   | C1    | 2.113894E-02  | 9.772674E-03  | -1.632786E-02 |
| 31   | H5    | -2.245682E-02 | -6.894493E-04 | -1.106135E-02 |
| 32   | H6    | 4.269849E-03  | -1.216673E-02 | 2.603804E-02  |



|       |       |               |               |               |
|-------|-------|---------------|---------------|---------------|
| 33    | C3    | 5.645640E-03  | 4.899727E-03  | -3.657363E-03 |
| 34    | C26   | 4.904907E-04  | 2.576969E-03  | 4.717966E-03  |
| 35    | C27   | -4.000485E-04 | -2.665549E-03 | -5.344084E-03 |
| 36    | C28   | 1.194079E-03  | -8.729806E-04 | -7.925486E-03 |
| 37    | C29   | 2.773262E-03  | 5.466727E-03  | 5.063842E-03  |
| 38    | H1    | 3.964567E-03  | -1.650721E-03 | -1.828743E-02 |
| 39    | H2    | 8.982905E-03  | 1.280343E-02  | 1.060548E-02  |
| 40    | H3    | -2.910655E-03 | 4.951888E-04  | 1.678907E-02  |
| 41    | H9    | -8.627735E-03 | -1.102210E-02 | -9.843115E-03 |
| 42    | H10   | -1.152274E-02 | -1.049380E-02 | 6.921504E-03  |
| 43    | H25   | 2.708121E-03  | -9.050340E-03 | -6.693826E-03 |
| ----- |       |               |               |               |
|       | total | 1.123978E-04  | 1.024489E-03  | 7.424633E-04  |

end of program der1b

start of program geopt 1

geometry optimization step 1

reading input hessian of dimension 129  
in five columns format

Level shifts adjusted to satisfy step-size constraints

Step size: 0.3000165

Cos(theta): 0.8700386

Final level shift: -9.0459602E-02

gradient maximum: 5.6400E-02 . ( 4.5000E-04 )

gradient rms: 1.1269E-02 . ( 3.0000E-04 )

step size: 0.30001 trust radius: 0.30000

displacement maximum: 7.9070E-02 . ( 1.8000E-03 )

displacement rms: 2.3571E-02 . ( 1.2000E-03 )

predicted energy change: -2.2790E-02 geom step: 3.0001E-

01 full step: 3.0001E-01

molecular structure not yet converged...

center of mass moved by:

x: 1.7900E-03 y: 7.9249E-03 z: 5.2280E-03

new geometry:

|      | angstroms     |               |               |
|------|---------------|---------------|---------------|
| atom | x             | y             | z             |
| N1   | -0.1851238607 | 0.4641584805  | 1.1496398783  |
| N2   | -0.9624306185 | -2.2803275995 | 1.1391335864  |
| C4   | -1.1923369589 | -0.0180925749 | 1.9481977188  |
| C5   | 0.0003838455  | -1.8866472314 | 0.4304247849  |
| C6   | -1.6131242204 | -1.3444054000 | 1.9677332987  |
| C7   | -1.7143322129 | 1.0107834641  | 2.7508560527  |
| C13  | 0.6888484121  | -2.8743700008 | -0.4705903976 |

|     |               |               |               |
|-----|---------------|---------------|---------------|
| H4  | -3.0326107871 | -2.6499595048 | 2.8909113274  |
| C8  | -2.7758076385 | 0.6768625265  | 3.6172856202  |
| C11 | -0.9256685288 | 2.1808482739  | 2.4168546928  |
| H7  | -3.2270829119 | 1.4262828740  | 4.2504106118  |
| C9  | -3.2256779072 | -0.6251283660 | 3.6377251029  |
| H8  | -4.0393570567 | -0.8900121801 | 4.2984882981  |
| C10 | -2.6561623240 | -1.6393208618 | 2.8310281808  |
| C12 | -0.0161416855 | 1.8156812458  | 1.4563175807  |
| C2  | 1.0081011308  | 2.6662618384  | 0.8151804166  |
| H13 | 1.7673251388  | -2.7356321765 | -0.3960304160 |
| C14 | 0.2466641767  | -2.7462605278 | -1.9265734159 |
| H15 | 0.4459377797  | -3.8754027525 | -0.1219375680 |
| C15 | -0.5453795077 | -2.5531842005 | -4.6103164906 |
| C16 | 1.1228101928  | -2.2821169158 | -2.9004344929 |
| C17 | -1.0389296276 | -3.1210357258 | -2.3122887225 |
| C18 | -1.4308521122 | -3.0220378034 | -3.6483671644 |
| C19 | 0.7311661555  | -2.1855070811 | -4.2360240634 |
| H16 | 2.1179862862  | -2.0041675136 | -2.6156208078 |
| H17 | -1.7271848709 | -3.4681454408 | -1.5658608400 |
| H18 | -2.4200252396 | -3.2868875229 | -3.9394618092 |
| H19 | 1.4207969829  | -1.8273231853 | -4.9765738859 |
| H20 | -0.8415814914 | -2.4643443665 | -5.6434658446 |
| C1  | 0.5813167973  | -0.4636626778 | 0.3433044617  |
| H5  | 1.6400268303  | -0.4816687726 | 0.6523424559  |
| H6  | 0.5606286448  | -0.1702832088 | -0.7202931642 |
| C3  | 2.9112386307  | 4.3243859975  | -0.3688081175 |
| C26 | 1.7641520157  | 3.5436729388  | 1.5963361301  |
| C27 | 1.2174113891  | 2.6356426600  | -0.5675864813 |
| C28 | 2.1639530001  | 3.4567854144  | -1.1533354185 |
| C29 | 2.7066639823  | 4.3656913408  | 1.0056564678  |
| H1  | 1.6123726912  | 3.5626682239  | 2.6583667114  |
| H2  | 0.6171678014  | 1.9866834111  | -1.1807727574 |
| H3  | 2.3092217370  | 3.4311451005  | -2.2201183904 |
| H9  | 3.2922168597  | 5.0359612586  | 1.6129911517  |
| H10 | 3.6489292197  | 4.9615184331  | -0.8293143894 |
| H25 | -1.0462406649 | 3.1705625677  | 2.8156287502  |

nuclear repulsion energy..... 1960.025589350 hartrees

-----  
 / end of geometry optimization iteration 1 /  
 -----

end of program geopt

start of program onee  
 smallest eigenvalue of S: 2.977E-04  
 number of canonical orbitals..... 461  
 end of program onee

start of program probe

end of program probe

start of program grid

number of gridpoints:

| atom     | N1  | N2  | C4  | C5  | C6  | C7  | C13 |
|----------|-----|-----|-----|-----|-----|-----|-----|
| H4       |     |     |     |     |     |     |     |
| grid # 1 | 97  | 102 | 87  | 88  | 88  | 92  | 84  |
| 73       |     |     |     |     |     |     |     |
| grid # 2 | 103 | 112 | 95  | 95  | 96  | 101 | 92  |
| 118      |     |     |     |     |     |     |     |
| grid # 3 | 214 | 227 | 197 | 186 | 193 | 197 | 164 |
| 223      |     |     |     |     |     |     |     |
| grid # 4 | 393 | 413 | 326 | 321 | 328 | 351 | 300 |
| 224      |     |     |     |     |     |     |     |

number of gridpoints:

| atom     | C8  | C11 | H7  | C9  | H8  | C10 | C12 |
|----------|-----|-----|-----|-----|-----|-----|-----|
| C2       |     |     |     |     |     |     |     |
| grid # 1 | 89  | 87  | 73  | 87  | 73  | 89  | 86  |
| 93       |     |     |     |     |     |     |     |
| grid # 2 | 97  | 94  | 118 | 97  | 118 | 97  | 96  |
| 100      |     |     |     |     |     |     |     |
| grid # 3 | 184 | 184 | 223 | 184 | 222 | 185 | 195 |
| 197      |     |     |     |     |     |     |     |
| grid # 4 | 328 | 336 | 226 | 331 | 224 | 332 | 319 |
| 344      |     |     |     |     |     |     |     |

number of gridpoints:

| atom     | H13 | C14 | H15 | C15 | C16 | C17 | C18 |
|----------|-----|-----|-----|-----|-----|-----|-----|
| C19      |     |     |     |     |     |     |     |
| grid # 1 | 69  | 93  | 69  | 89  | 88  | 89  | 89  |
| 89       |     |     |     |     |     |     |     |
| grid # 2 | 109 | 100 | 109 | 97  | 96  | 96  | 97  |
| 97       |     |     |     |     |     |     |     |
| grid # 3 | 211 | 195 | 214 | 184 | 184 | 184 | 186 |
| 182      |     |     |     |     |     |     |     |
| grid # 4 | 216 | 340 | 216 | 328 | 328 | 330 | 331 |
| 328      |     |     |     |     |     |     |     |

number of gridpoints:

| atom     | H16 | H17 | H18 | H19 | H20 | C1  | H5  |
|----------|-----|-----|-----|-----|-----|-----|-----|
| H6       |     |     |     |     |     |     |     |
| grid # 1 | 72  | 72  | 73  | 73  | 73  | 82  | 72  |
| 69       |     |     |     |     |     |     |     |
| grid # 2 | 112 | 115 | 118 | 118 | 118 | 90  | 112 |
| 102      |     |     |     |     |     |     |     |
| grid # 3 | 213 | 216 | 223 | 222 | 223 | 166 | 217 |
| 205      |     |     |     |     |     |     |     |
| grid # 4 | 214 | 215 | 224 | 222 | 223 | 294 | 219 |
| 207      |     |     |     |     |     |     |     |

| number of gridpoints: |          | C3  | C26 | C27 | C28 | C29 | H1  | H2  |
|-----------------------|----------|-----|-----|-----|-----|-----|-----|-----|
| H3                    | atom     |     |     |     |     |     |     |     |
| 73                    | grid # 1 | 89  | 87  | 87  | 89  | 89  | 72  | 70  |
| 118                   | grid # 2 | 97  | 97  | 96  | 97  | 97  | 115 | 111 |
| 222                   | grid # 3 | 185 | 181 | 183 | 184 | 184 | 218 | 213 |
| 224                   | grid # 4 | 329 | 328 | 330 | 328 | 328 | 217 | 210 |

| number of gridpoints: |     |     |     |       |
|-----------------------|-----|-----|-----|-------|
| atom                  | H9  | H10 | H25 | total |
| grid # 1              | 73  | 73  | 72  | 3523  |
| grid # 2              | 118 | 118 | 115 | 4494  |
| grid # 3              | 223 | 223 | 219 | 8635  |
| grid # 4              | 224 | 224 | 222 | 12295 |

end of program grid

start of program rwr  
end of program rwr

start of program scf

|      | i | u | d | i | g |                  | RMS     | maximum |
|------|---|---|---|---|---|------------------|---------|---------|
|      | t | p | i | c | r |                  | density | DIIS    |
|      | e | d | i | u | i | energy           | change  | error   |
|      | r | t | s | t | d | total energy     | change  |         |
| etot | 1 | N | N | 2 | U | -990.37561875819 | 2.2E-04 | 5.2E-03 |
| etot | 2 | Y | Y | 6 | M | -990.38629314976 | 1.1E-02 | 2.1E-03 |
| etot | 3 | N | Y | 2 | U | -990.38722199985 | 9.3E-04 | 7.2E-04 |
| etot | 4 | Y | Y | 6 | M | -990.38736835388 | 1.5E-04 | 3.4E-04 |
| etot | 5 | Y | Y | 6 | M | -990.38740323781 | 3.5E-05 | 1.3E-04 |
| etot | 6 | Y | Y | 6 | M | -990.38740916528 | 5.9E-06 | 4.7E-05 |
| etot | 7 | Y | N | 6 | M | -990.38741265890 | 3.5E-06 | 0.0E+00 |

Energy components, in hartrees:

|     |                               |                   |       |
|-----|-------------------------------|-------------------|-------|
| (A) | Nuclear repulsion.....        | 1960.02558935013  |       |
| (E) | Total one-electron terms..... | -5238.29315543660 |       |
| (I) | Total two-electron terms..... | 2287.88015342757  |       |
| (L) | Electronic energy.....        | -2950.41300200903 | (E+I) |
| (N) | Total energy.....             | -990.38741265890  | (A+L) |

SCFE: SCF energy: HF -990.38741265890 hartrees iterations:

HOMO energy: -0.26625  
LUMO energy: 0.09232

Orbital energies:

|           |           |           |           |           |           |
|-----------|-----------|-----------|-----------|-----------|-----------|
| -15.60805 | -15.56700 | -11.29787 | -11.29337 | -11.27638 | -11.25511 |
| -11.25341 | -11.25179 | -11.24692 | -11.24146 | -11.24113 | -11.24000 |
| -11.23941 | -11.23867 | -11.23797 | -11.23592 | -11.23504 | -11.23469 |
| -11.23278 | -11.23229 | -11.22657 | -11.22384 | -11.22377 | -11.21820 |
| -11.21692 | -1.31817  | -1.24994  | -1.16238  | -1.15889  | -1.13461  |
| -1.07262  | -1.06754  | -1.03658  | -1.02296  | -1.01802  | -1.01474  |
| -0.96749  | -0.95529  | -0.93114  | -0.85928  | -0.83758  | -0.83378  |
| -0.83067  | -0.80421  | -0.79354  | -0.76882  | -0.73077  | -0.71744  |
| -0.69958  | -0.69803  | -0.66500  | -0.65657  | -0.64316  | -0.63792  |
| -0.63536  | -0.62308  | -0.61992  | -0.61392  | -0.59697  | -0.59327  |
| -0.58930  | -0.58645  | -0.57884  | -0.55677  | -0.55072  | -0.54533  |
| -0.54289  | -0.51775  | -0.50819  | -0.50301  | -0.50024  | -0.49594  |
| -0.49263  | -0.49143  | -0.48732  | -0.48017  | -0.42932  | -0.40604  |
| -0.36912  | -0.34308  | -0.34234  | -0.33503  | -0.33025  | -0.28019  |
| -0.26625  | 0.09232   | 0.12603   | 0.13625   | 0.13684   | 0.14868   |
| 0.17722   | 0.20851   | 0.22157   | 0.23301   | 0.24218   |           |

end of program scf

start of program derla  
end of program derla

start of program rwr  
end of program rwr

start of program derlb

forces (hartrees/bohr) : total

| atom | label | x             | y             | z             |
|------|-------|---------------|---------------|---------------|
| 1    | N1    | -9.539155E-03 | 2.745592E-03  | 1.044822E-02  |
| 2    | N2    | -2.673465E-03 | 1.727028E-03  | 2.906341E-03  |
| 3    | C4    | -1.885556E-04 | 1.245403E-02  | 3.193744E-03  |
| 4    | C5    | 2.271285E-03  | 6.211561E-03  | 1.516907E-03  |
| 5    | C6    | -6.464198E-03 | 7.479387E-03  | 7.554108E-03  |
| 6    | C7    | 8.793345E-03  | -1.029557E-02 | -9.843759E-03 |
| 7    | C13   | -5.471678E-04 | -7.069051E-03 | -5.718790E-03 |
| 8    | H4    | 1.852086E-03  | 3.212933E-03  | -7.082379E-04 |
| 9    | C8    | 4.338852E-03  | 4.033060E-03  | -3.262937E-03 |
| 10   | C11   | 1.606909E-03  | -1.006096E-02 | -6.249112E-03 |
| 11   | H7    | 9.730113E-04  | -2.564706E-03 | -1.338833E-03 |
| 12   | C9    | -5.458253E-04 | -4.327700E-03 | -5.240229E-04 |

|       |       |               |               |               |
|-------|-------|---------------|---------------|---------------|
| 13    | H8    | 2.968983E-03  | 5.464179E-04  | -2.555816E-03 |
| 14    | C10   | 4.804096E-03  | 2.217867E-04  | -3.885245E-03 |
| 15    | C12   | -7.171547E-03 | -3.974109E-03 | 7.707933E-03  |
| 16    | C2    | 9.332330E-04  | 2.740879E-04  | -3.181994E-03 |
| 17    | H13   | -2.015010E-03 | -1.526317E-03 | -1.690651E-03 |
| 18    | C14   | 3.524810E-03  | -3.916218E-04 | -2.663166E-03 |
| 19    | H15   | 1.889224E-03  | 3.787146E-03  | 1.319866E-03  |
| 20    | C15   | -1.027612E-03 | 6.505881E-05  | 3.781739E-04  |
| 21    | C16   | -4.116869E-03 | -8.483180E-04 | -5.317073E-03 |
| 22    | C17   | -1.277121E-04 | 3.725580E-03  | -1.022516E-02 |
| 23    | C18   | 8.848389E-03  | 3.067855E-03  | 9.831513E-03  |
| 24    | C19   | 3.253650E-03  | -3.767333E-04 | 8.365422E-03  |
| 25    | H16   | 4.090188E-03  | 1.430527E-03  | -2.015014E-04 |
| 26    | H17   | -2.307131E-03 | -1.447538E-03 | 4.755238E-04  |
| 27    | H18   | -8.359663E-03 | -3.799457E-03 | -4.288966E-04 |
| 28    | H19   | 2.299917E-03  | 9.846778E-04  | -2.783170E-04 |
| 29    | H20   | -1.387235E-03 | -1.403497E-03 | 2.321291E-03  |
| 30    | C1    | 3.683293E-03  | 3.676776E-03  | -8.195002E-03 |
| 31    | H5    | -9.851720E-03 | -8.517076E-04 | -2.436073E-03 |
| 32    | H6    | 1.473065E-03  | -4.295533E-03 | 1.252041E-02  |
| 33    | C3    | 3.914041E-04  | -3.266543E-04 | 4.963776E-04  |
| 34    | C26   | -2.384326E-03 | -3.429782E-03 | -4.918934E-03 |
| 35    | C27   | -1.975575E-03 | -5.180976E-04 | 5.429357E-03  |
| 36    | C28   | 1.047866E-03  | 1.965373E-03  | 9.943780E-04  |
| 37    | C29   | 2.585439E-03  | 2.168460E-03  | -3.629454E-03 |
| 38    | H1    | 4.052696E-04  | 7.061260E-05  | 1.388971E-03  |
| 39    | H2    | 5.731526E-04  | 1.449645E-03  | 2.603645E-05  |
| 40    | H3    | 3.735787E-05  | -1.572279E-04 | 8.376755E-04  |
| 41    | H9    | -9.939832E-04 | -7.438282E-04 | -2.855378E-04 |
| 42    | H10   | -1.057111E-03 | -6.022944E-04 | 1.457865E-03  |
| 43    | H25   | 1.116333E-03  | -1.534056E-03 | -1.866734E-03 |
| ----- |       |               |               |               |
|       | total | 1.027296E-03  | 7.528330E-04  | -2.351347E-04 |

end of program derlb

start of program geopt 2

geometry optimization step 2

reading input hessian of dimension 129  
in five columns format

Level shifts adjusted to satisfy step-size constraints

Step size: 0.3001262

Cos(theta): 0.4522028

Final level shift: -7.1431608E-03

energy change: -2.1167E-02 . ( 5.0000E-05 )

gradient maximum: 2.0310E-02 . ( 4.5000E-04 )

gradient rms: 3.9611E-03 . ( 3.0000E-04 )  
 step size: 0.29998 trust radius: 0.30000  
 displacement maximum: 1.2227E-01 . ( 1.8000E-03 )  
 displacement rms: 2.3569E-02 . ( 1.2000E-03 )  
 predicted energy change: -3.7426E-03 geom step: 2.9998E-  
 01 full step: 2.9998E-01  
 molecular structure not yet converged...

center of mass moved by:

x: -9.2535E-03 y: 3.1123E-03 z: 1.4212E-03

new geometry:

|      | angstroms     |               |               |
|------|---------------|---------------|---------------|
| atom | x             | y             | z             |
| N1   | -0.2322091003 | 0.4425447477  | 1.1722376588  |
| N2   | -1.0170271355 | -2.2784648229 | 1.1730995628  |
| C4   | -1.2206159278 | -0.0226657246 | 1.9837450839  |
| C5   | -0.0448348209 | -1.9052512670 | 0.4751983779  |
| C6   | -1.6507777180 | -1.3371163143 | 2.0094539253  |
| C7   | -1.7024716670 | 0.9919018866  | 2.7899381630  |
| C13  | 0.6283020713  | -2.9170533017 | -0.4248611566 |
| H4   | -3.0346295842 | -2.6472027368 | 2.9359624232  |
| C8   | -2.7497248744 | 0.6679486212  | 3.6759761067  |
| C11  | -0.9219400908 | 2.1551243638  | 2.4291375123  |
| H7   | -3.1822925194 | 1.4081076944  | 4.3208527754  |
| C9   | -3.2122659889 | -0.6338983252 | 3.7021230748  |
| H8   | -4.0092368660 | -0.8922566392 | 4.3712351952  |
| C10  | -2.6664125428 | -1.6434906978 | 2.8798451206  |
| C12  | -0.0462186113 | 1.7852092098  | 1.4609796706  |
| C2   | 0.9639603762  | 2.6172556086  | 0.7603660644  |
| H13  | 1.7049014864  | -2.8504962231 | -0.3042157835 |
| C14  | 0.2872845063  | -2.7186247711 | -1.9011082558 |
| H15  | 0.3111604572  | -3.8957135626 | -0.0910075502 |
| C15  | -0.3637160763 | -2.3879002288 | -4.5957973831 |
| C16  | 1.2521389896  | -2.2939910017 | -2.8167452985 |
| C17  | -1.0099224983 | -2.9730715129 | -2.3497803317 |
| C18  | -1.3345315137 | -2.8115555909 | -3.6881685682 |
| C19  | 0.9281516443  | -2.1274223633 | -4.1580106912 |
| H16  | 2.2689730521  | -2.0919467686 | -2.4900654971 |
| H17  | -1.7651731246 | -3.3056021719 | -1.6519350479 |
| H18  | -2.3449269541 | -3.0307603123 | -4.0214737620 |
| H19  | 1.6928080246  | -1.7993395561 | -4.8496324883 |
| H20  | -0.6146895035 | -2.2677049661 | -5.6318950361 |
| C1   | 0.5593460744  | -0.4968540721 | 0.4025037161  |
| H5   | 1.5835558214  | -0.5417582018 | 0.7564692615  |
| H6   | 0.6038790034  | -0.2150061772 | -0.6400473898 |
| C3   | 2.8215489000  | 4.2490688071  | -0.5283409458 |
| C26  | 1.8492457635  | 3.4064361869  | 1.4997536269  |
| C27  | 1.0238745658  | 2.6583201916  | -0.6349113427 |
| C28  | 1.9515451393  | 3.4616543589  | -1.2728168602 |
| C29  | 2.7672368925  | 4.2206654051  | 0.8601900607  |
| H1   | 1.8310545892  | 3.3653506796  | 2.5769048131  |

|     |               |              |               |
|-----|---------------|--------------|---------------|
| H2  | 0.3330469792  | 2.0787631427 | -1.2253750449 |
| H3  | 1.9815361995  | 3.4802193197 | -2.3500591580 |
| H9  | 3.4413282681  | 4.8236548923 | 1.4492434236  |
| H10 | 3.5316247441  | 4.8745490259 | -1.0248311658 |
| H25 | -1.0230567326 | 3.1472274108 | 2.8145615026  |

nuclear repulsion energy..... 1967.210994655 hartrees

-----  
/ end of geometry optimization iteration 2 /  
-----

end of program geopt

start of program onee  
smallest eigenvalue of S: 2.843E-04  
number of canonical orbitals..... 461  
end of program onee

start of program probe  
end of program probe

start of program grid

number of gridpoints:

| atom     | N1  | N2  | C4  | C5  | C6  | C7  | C13 |
|----------|-----|-----|-----|-----|-----|-----|-----|
| H4       |     |     |     |     |     |     |     |
| grid # 1 | 97  | 102 | 84  | 88  | 87  | 89  | 84  |
| 73       |     |     |     |     |     |     |     |
| grid # 2 | 104 | 112 | 96  | 95  | 97  | 97  | 92  |
| 118      |     |     |     |     |     |     |     |
| grid # 3 | 214 | 227 | 196 | 186 | 189 | 198 | 163 |
| 223      |     |     |     |     |     |     |     |
| grid # 4 | 391 | 413 | 320 | 320 | 324 | 348 | 300 |
| 224      |     |     |     |     |     |     |     |

number of gridpoints:

| atom     | C8  | C11 | H7  | C9  | H8  | C10 | C12 |
|----------|-----|-----|-----|-----|-----|-----|-----|
| C2       |     |     |     |     |     |     |     |
| grid # 1 | 89  | 87  | 73  | 87  | 73  | 89  | 86  |
| 92       |     |     |     |     |     |     |     |
| grid # 2 | 97  | 94  | 118 | 97  | 118 | 97  | 94  |
| 100      |     |     |     |     |     |     |     |
| grid # 3 | 184 | 185 | 223 | 186 | 222 | 184 | 194 |
| 196      |     |     |     |     |     |     |     |
| grid # 4 | 330 | 331 | 226 | 331 | 223 | 327 | 316 |
| 343      |     |     |     |     |     |     |     |

number of gridpoints:



|          |     |     |     |     |     |     |     |
|----------|-----|-----|-----|-----|-----|-----|-----|
| atom     | H13 | C14 | H15 | C15 | C16 | C17 | C18 |
| C19      |     |     |     |     |     |     |     |
| grid # 1 | 69  | 93  | 69  | 89  | 88  | 88  | 89  |
| grid # 2 | 109 | 101 | 109 | 97  | 96  | 96  | 97  |
| grid # 3 | 211 | 195 | 214 | 184 | 185 | 184 | 185 |
| grid # 4 | 214 | 342 | 212 | 329 | 329 | 328 | 328 |

number of gridpoints:

|          |     |     |     |     |     |     |     |
|----------|-----|-----|-----|-----|-----|-----|-----|
| atom     | H16 | H17 | H18 | H19 | H20 | C1  | H5  |
| grid # 1 | 72  | 73  | 73  | 73  | 73  | 82  | 70  |
| grid # 2 | 113 | 115 | 118 | 118 | 118 | 88  | 109 |
| grid # 3 | 214 | 215 | 223 | 222 | 224 | 165 | 217 |
| grid # 4 | 221 | 215 | 224 | 222 | 224 | 290 | 217 |

number of gridpoints:

|          |     |     |     |     |     |     |     |
|----------|-----|-----|-----|-----|-----|-----|-----|
| atom     | C3  | C26 | C27 | C28 | C29 | H1  | H2  |
| grid # 1 | 89  | 89  | 88  | 89  | 89  | 72  | 71  |
| grid # 2 | 97  | 95  | 96  | 97  | 97  | 115 | 114 |
| grid # 3 | 185 | 182 | 185 | 184 | 184 | 218 | 214 |
| grid # 4 | 328 | 328 | 330 | 328 | 329 | 218 | 210 |

number of gridpoints:

|          |     |     |     |       |
|----------|-----|-----|-----|-------|
| atom     | H9  | H10 | H25 | total |
| grid # 1 | 73  | 73  | 72  | 3517  |
| grid # 2 | 118 | 118 | 115 | 4490  |
| grid # 3 | 223 | 223 | 220 | 8640  |
| grid # 4 | 223 | 224 | 224 | 12258 |

end of program grid

start of program rwr  
recomputing RWR matrix 1 grid: 4  
end of program rwr

start of program scf

|      | i | u | d | i | g |                  |         | RMS     | maximum |
|------|---|---|---|---|---|------------------|---------|---------|---------|
|      | t | p | i | c | r |                  |         | density | DIIS    |
|      | e | d | i | u | i | total energy     | energy  | change  | error   |
|      | r | t | s | t | d |                  | change  |         |         |
| etot | 1 | N | N | 2 | U | -990.33510685770 |         | 3.7E-04 | 3.1E-02 |
| etot | 2 | Y | Y | 6 | M | -990.38314472816 | 4.8E-02 | 1.8E-04 | 1.2E-02 |
| etot | 3 | N | Y | 2 | U | -990.38935537066 | 6.2E-03 | 5.3E-05 | 3.1E-03 |
| etot | 4 | Y | Y | 6 | M | -990.38969679674 | 3.4E-04 | 2.3E-05 | 1.1E-03 |
| etot | 5 | Y | Y | 6 | M | -990.38977611385 | 7.9E-05 | 7.6E-06 | 2.8E-04 |
| etot | 6 | N | Y | 2 | U | -990.38979109239 | 1.5E-05 | 3.0E-06 | 6.9E-05 |
| etot | 7 | Y | N | 6 | M | -990.38979365506 | 2.6E-06 | 0.0E+00 | 0.0E+00 |

Energy components, in hartrees:

|     |                               |                   |       |
|-----|-------------------------------|-------------------|-------|
| (A) | Nuclear repulsion.....        | 1967.21099465467  |       |
| (E) | Total one-electron terms..... | -5252.71557057016 |       |
| (I) | Total two-electron terms..... | 2295.11478226043  |       |
| (L) | Electronic energy.....        | -2957.60078830974 | (E+I) |
| (N) | Total energy.....             | -990.38979365506  | (A+L) |

SCFE: SCF energy: HF -990.38979365506 hartrees iterations:

7

HOMO energy: -0.26875  
LUMO energy: 0.09679

Orbital energies:

|           |           |           |           |           |           |
|-----------|-----------|-----------|-----------|-----------|-----------|
| -15.60440 | -15.56408 | -11.29484 | -11.28605 | -11.27171 | -11.25310 |
| -11.25060 | -11.24821 | -11.24599 | -11.24090 | -11.23981 | -11.23932 |
| -11.23928 | -11.23863 | -11.23847 | -11.23780 | -11.23743 | -11.23721 |
| -11.23472 | -11.23260 | -11.22506 | -11.21958 | -11.21917 | -11.21594 |
| -11.21230 | -1.32371  | -1.25138  | -1.16194  | -1.15811  | -1.13746  |
| -1.07380  | -1.06529  | -1.03784  | -1.02261  | -1.01706  | -1.01675  |
| -0.97106  | -0.95358  | -0.93345  | -0.86016  | -0.83584  | -0.83204  |
| -0.82722  | -0.80690  | -0.79592  | -0.76979  | -0.73260  | -0.71689  |
| -0.70107  | -0.69646  | -0.66553  | -0.65782  | -0.64254  | -0.63657  |
| -0.63323  | -0.62328  | -0.62039  | -0.61546  | -0.59597  | -0.59273  |
| -0.59071  | -0.58733  | -0.57653  | -0.55793  | -0.55254  | -0.54806  |
| -0.54230  | -0.51743  | -0.50677  | -0.50276  | -0.50055  | -0.49573  |
| -0.49322  | -0.49115  | -0.48789  | -0.48019  | -0.42914  | -0.40421  |
| -0.36715  | -0.34259  | -0.34204  | -0.33775  | -0.32820  | -0.28241  |
| -0.26875  | 0.09679   | 0.12767   | 0.13691   | 0.13716   | 0.14724   |
| 0.17920   | 0.20956   | 0.22641   | 0.23420   | 0.24136   |           |

end of program scf

start of program derla  
end of program derla

```

start of program rwr
recomputing RwR matrix 1      grid: 4
end of program rwr

```

```

start of program der1b

```

```

forces (hartrees/bohr) : total

```

| atom | label | x             | y             | z             |
|------|-------|---------------|---------------|---------------|
| ---- | ----- | -----         | -----         | -----         |
| 1    | N1    | 1.305964E-03  | -1.677270E-03 | -2.594790E-03 |
| 2    | N2    | -7.405171E-03 | -1.586511E-03 | 6.320733E-03  |
| 3    | C4    | 3.028731E-03  | 1.790473E-03  | -3.798228E-04 |
| 4    | C5    | 7.226851E-03  | 4.524737E-03  | -7.098855E-03 |
| 5    | C6    | 2.476199E-04  | -3.135427E-03 | 2.297075E-04  |
| 6    | C7    | -2.330886E-03 | 2.478329E-03  | 3.273788E-04  |
| 7    | C13   | 2.227097E-04  | 1.311746E-03  | -4.798910E-03 |
| 8    | H4    | -1.002454E-03 | -3.214195E-03 | -8.533394E-05 |
| 9    | C8    | 2.159221E-03  | -4.853058E-03 | -3.527892E-03 |
| 10   | C11   | -3.302127E-03 | -1.233147E-03 | 3.282272E-03  |
| 11   | H7    | -7.362198E-04 | 1.749372E-03  | 1.319340E-03  |
| 12   | C9    | 3.320533E-03  | 4.276770E-03  | -1.934309E-03 |
| 13   | H8    | -1.912353E-03 | -7.144657E-04 | 1.822387E-03  |
| 14   | C10   | 8.315593E-04  | 4.548646E-03  | 7.271826E-04  |
| 15   | C12   | 4.548962E-03  | -1.450949E-03 | -2.371630E-03 |
| 16   | C2    | -9.938152E-04 | 7.535157E-04  | 1.267906E-03  |
| 17   | H13   | 1.386542E-03  | -4.258552E-04 | 9.927676E-04  |
| 18   | C14   | 2.299989E-03  | -7.682804E-05 | 1.238775E-03  |
| 19   | H15   | 1.984307E-04  | -8.884950E-04 | -8.118002E-04 |
| 20   | C15   | -6.451323E-04 | -1.027048E-03 | 4.774511E-03  |
| 21   | C16   | -2.632256E-04 | -3.149773E-04 | 3.356515E-03  |
| 22   | C17   | 1.008954E-03  | 6.183636E-05  | -1.888416E-03 |
| 23   | C18   | 1.484312E-04  | -5.973317E-04 | -2.098115E-03 |
| 24   | C19   | -1.156244E-03 | -3.591191E-04 | 4.042049E-04  |
| 25   | H16   | -7.120642E-03 | -2.020923E-03 | -6.701640E-04 |
| 26   | H17   | 3.236541E-03  | 1.487269E-03  | -1.213183E-03 |
| 27   | H18   | 7.301887E-03  | 2.526935E-03  | 1.127166E-03  |
| 28   | H19   | -4.266701E-03 | -1.422013E-03 | 1.600621E-03  |
| 29   | H20   | -5.797366E-04 | 3.861398E-04  | -2.246165E-03 |
| 30   | C1    | -5.155529E-03 | -8.921110E-04 | 1.159786E-03  |
| 31   | H5    | 2.282436E-03  | 2.852896E-04  | 2.405521E-03  |
| 32   | H6    | -2.782347E-04 | 1.257850E-03  | -1.502622E-03 |
| 33   | C3    | -3.641709E-03 | -3.629131E-03 | 3.069671E-03  |
| 34   | C26   | -2.578335E-03 | -3.574081E-03 | -3.583493E-04 |
| 35   | C27   | -8.629869E-04 | -1.384270E-03 | 3.235411E-03  |
| 36   | C28   | 1.635804E-03  | 2.327281E-03  | 9.648920E-04  |
| 37   | C29   | 8.904502E-04  | 7.644047E-04  | -3.194343E-03 |
| 38   | H1    | -1.706450E-03 | -2.318215E-04 | -2.241600E-03 |
| 39   | H2    | 4.690082E-04  | 6.810360E-04  | 2.172640E-03  |
| 40   | H3    | 8.078606E-04  | 8.518771E-04  | 1.530140E-03  |

|       |       |               |               |               |
|-------|-------|---------------|---------------|---------------|
| 41    | H9    | -1.100102E-03 | -1.113211E-03 | -2.495881E-03 |
| 42    | H10   | 3.825774E-03  | 3.254866E-03  | -2.412596E-03 |
| 43    | H25   | -2.808875E-04 | 1.593320E-03  | 4.916000E-04  |
| ----- |       |               |               |               |
|       | total | 1.065317E-03  | 1.089457E-03  | -1.036505E-04 |

end of program derlb

start of program geopt 3

geometry optimization step 3

reading input hessian of dimension 129

in five columns format

reading input hessian of dimension 129

in five columns format

Level shifts adjusted to satisfy step-size constraints

Step size: 0.3000236

Cos(theta): 0.4953472

Final level shift: -1.6630388E-02

energy change: -2.3810E-03 . ( 5.0000E-05 )

gradient maximum: 9.9076E-03 . ( 4.5000E-04 )

gradient rms: 2.3236E-03 . ( 3.0000E-04 )

step size: 0.29975 trust radius: 0.30000

displacement maximum: 1.0837E-01 . ( 1.8000E-03 )

displacement rms: 2.3551E-02 . ( 1.2000E-03 )

predicted energy change: -2.9446E-03 geom step: 2.9975E-

01 full step: 2.9975E-01

molecular structure not yet converged...

center of mass moved by:

x: 4.5379E-03 y: 1.6225E-03 z: -1.0573E-02

new geometry:

|      | angstroms     |               |               |
|------|---------------|---------------|---------------|
| atom | x             | y             | z             |
| N1   | -0.2064093151 | 0.4564334872  | 1.1449569640  |
| N2   | -0.9777143120 | -2.2675882391 | 1.1401282031  |
| C4   | -1.2067896365 | -0.0074822023 | 1.9347114372  |
| C5   | 0.0100178696  | -1.8812418506 | 0.4407932188  |
| C6   | -1.6301115836 | -1.3290633316 | 1.9647297688  |
| C7   | -1.7180530931 | 1.0023503931  | 2.7134818099  |
| C13  | 0.7013842690  | -2.8816737324 | -0.4740592873 |
| H4   | -3.0216327063 | -2.6539904306 | 2.8557401227  |
| C8   | -2.7796853502 | 0.6766421222  | 3.5699349035  |
| C11  | -0.9469746435 | 2.1651389329  | 2.3678165600  |
| H7   | -3.2396438255 | 1.4178307697  | 4.2013122414  |
| C9   | -3.2317902692 | -0.6316840549 | 3.6015379272  |

|     |               |               |               |
|-----|---------------|---------------|---------------|
| H8  | -4.0475645815 | -0.8929676898 | 4.2526147254  |
| C10 | -2.6592479127 | -1.6425581119 | 2.8070396413  |
| C12 | -0.0282154727 | 1.7951337785  | 1.4350689770  |
| C2  | 0.9934644979  | 2.6280168532  | 0.7795619441  |
| H13 | 1.7730430366  | -2.7575478083 | -0.4156955215 |
| C14 | 0.2865859920  | -2.7249268767 | -1.9051731340 |
| H15 | 0.4713121897  | -3.8629015133 | -0.0943843922 |
| C15 | -0.5615655542 | -2.4619627032 | -4.5190042806 |
| C16 | 1.1125815133  | -2.1862381413 | -2.8583626252 |
| C17 | -0.9661916103 | -3.1291782413 | -2.2777042664 |
| C18 | -1.3890096252 | -3.0026868085 | -3.5700862667 |
| C19 | 0.6893320833  | -2.0524259860 | -4.1584209800 |
| H16 | 2.0979129012  | -1.8591107039 | -2.5945051992 |
| H17 | -1.6160289056 | -3.5619217481 | -1.5421987308 |
| H18 | -2.3733434532 | -3.3581172536 | -3.8357831773 |
| H19 | 1.3434543159  | -1.6264018218 | -4.8889259482 |
| H20 | -0.9021702747 | -2.3804723563 | -5.5318037396 |
| C1  | 0.5974414175  | -0.4754948750 | 0.3889408228  |
| H5  | 1.6054220101  | -0.5235796038 | 0.7857568676  |
| H6  | 0.6751609178  | -0.1866596432 | -0.6452941877 |
| C3  | 2.9244707837  | 4.2594570176  | -0.3923566804 |
| C26 | 1.7907979932  | 3.4485799055  | 1.5329596121  |
| C27 | 1.1713262529  | 2.6405355796  | -0.5729922605 |
| C28 | 2.1366910125  | 3.4439199169  | -1.1538018568 |
| C29 | 2.7452329284  | 4.2656384654  | 0.9532276351  |
| H1  | 1.6745334301  | 3.4364257238  | 2.5857229416  |
| H2  | 0.5529801450  | 2.0327292614  | -1.1904461656 |
| H3  | 2.2687279040  | 3.4308993892  | -2.2062196320 |
| H9  | 3.3448720185  | 4.8980738147  | 1.5650329855  |
| H10 | 3.6696029435  | 4.8876836769  | -0.8403675527 |
| H25 | -1.0676334116 | 3.1643232144  | 2.7358050805  |

nuclear repulsion energy..... 1978.365603056 hartrees

-----  
 / end of geometry optimization iteration 3 /  
 -----

end of program geopt

start of program onee  
 smallest eigenvalue of S: 2.790E-04  
 number of canonical orbitals..... 461  
 end of program onee

start of program probe  
 end of program probe

start of program grid

| number of gridpoints: |          |     |     |     |     |     |     |     |
|-----------------------|----------|-----|-----|-----|-----|-----|-----|-----|
|                       | atom     | N1  | N2  | C4  | C5  | C6  | C7  | C13 |
| H4                    |          |     |     |     |     |     |     |     |
| 73                    | grid # 1 | 96  | 102 | 86  | 88  | 90  | 88  | 84  |
| 118                   | grid # 2 | 104 | 112 | 95  | 95  | 99  | 96  | 92  |
| 224                   | grid # 3 | 214 | 227 | 194 | 188 | 192 | 198 | 164 |
| 223                   | grid # 4 | 389 | 414 | 321 | 321 | 322 | 344 | 298 |

| number of gridpoints: |          |     |     |     |     |     |     |     |
|-----------------------|----------|-----|-----|-----|-----|-----|-----|-----|
|                       | atom     | C8  | C11 | H7  | C9  | H8  | C10 | C12 |
| C2                    |          |     |     |     |     |     |     |     |
| 88                    | grid # 1 | 89  | 87  | 73  | 87  | 73  | 89  | 86  |
| 99                    | grid # 2 | 97  | 94  | 118 | 97  | 118 | 97  | 94  |
| 191                   | grid # 3 | 185 | 184 | 223 | 185 | 222 | 184 | 195 |
| 339                   | grid # 4 | 331 | 331 | 226 | 330 | 223 | 326 | 320 |

| number of gridpoints: |          |     |     |     |     |     |     |     |
|-----------------------|----------|-----|-----|-----|-----|-----|-----|-----|
|                       | atom     | H13 | C14 | H15 | C15 | C16 | C17 | C18 |
| C19                   |          |     |     |     |     |     |     |     |
| 87                    | grid # 1 | 69  | 93  | 69  | 87  | 86  | 87  | 87  |
| 97                    | grid # 2 | 109 | 101 | 109 | 97  | 96  | 96  | 97  |
| 182                   | grid # 3 | 211 | 191 | 213 | 182 | 182 | 181 | 182 |
| 327                   | grid # 4 | 209 | 339 | 212 | 325 | 327 | 327 | 328 |

| number of gridpoints: |          |     |     |     |     |     |     |     |
|-----------------------|----------|-----|-----|-----|-----|-----|-----|-----|
|                       | atom     | H16 | H17 | H18 | H19 | H20 | C1  | H5  |
| H6                    |          |     |     |     |     |     |     |     |
| 69                    | grid # 1 | 72  | 72  | 73  | 73  | 73  | 82  | 70  |
| 103                   | grid # 2 | 113 | 114 | 118 | 118 | 118 | 87  | 108 |
| 204                   | grid # 3 | 213 | 215 | 222 | 221 | 223 | 163 | 217 |
| 202                   | grid # 4 | 213 | 214 | 223 | 222 | 224 | 290 | 217 |

| number of gridpoints: |      |    |     |     |     |     |    |    |
|-----------------------|------|----|-----|-----|-----|-----|----|----|
|                       | atom | C3 | C26 | C27 | C28 | C29 | H1 | H2 |
| H3                    |      |    |     |     |     |     |    |    |

|          |     |     |     |     |     |     |     |
|----------|-----|-----|-----|-----|-----|-----|-----|
| grid # 1 | 89  | 87  | 86  | 87  | 87  | 72  | 70  |
| 73       |     |     |     |     |     |     |     |
| grid # 2 | 97  | 96  | 96  | 97  | 97  | 115 | 113 |
| 118      |     |     |     |     |     |     |     |
| grid # 3 | 182 | 181 | 182 | 182 | 183 | 217 | 213 |
| 222      |     |     |     |     |     |     |     |
| grid # 4 | 328 | 326 | 327 | 327 | 324 | 216 | 210 |
| 222      |     |     |     |     |     |     |     |

number of gridpoints:

|          |     |     |     |       |
|----------|-----|-----|-----|-------|
| atom     | H9  | H10 | H25 | total |
| grid # 1 | 73  | 73  | 72  | 3497  |
| grid # 2 | 118 | 118 | 115 | 4486  |
| grid # 3 | 222 | 222 | 219 | 8597  |
| grid # 4 | 223 | 223 | 222 | 12205 |

end of program grid

start of program rwr

end of program rwr

start of program scf

|      | i | u | d | i | g |                  |          | RMS     | maximum |
|------|---|---|---|---|---|------------------|----------|---------|---------|
|      | t | p | i | c | r |                  |          | density | DIIS    |
|      | e | d | i | u | i |                  | energy   | change  | error   |
|      | r | t | s | t | d | total energy     | change   |         |         |
| etot | 1 | N | N | 2 | U | -990.32090183004 |          | 4.0E-04 | 2.7E-02 |
| etot | 2 | Y | Y | 6 | M | -990.37602444074 | 5.5E-02  | 1.9E-04 | 1.1E-02 |
| etot | 3 | N | Y | 2 | U | -990.38279174353 | 6.8E-03  | 5.6E-05 | 2.9E-03 |
| etot | 4 | Y | Y | 6 | M | -990.38330673990 | 5.1E-04  | 2.8E-05 | 1.2E-03 |
| etot | 5 | Y | Y | 6 | M | -990.38339751676 | 9.1E-05  | 7.9E-06 | 2.7E-04 |
| etot | 6 | N | Y | 2 | U | -990.38336351948 | -3.4E-05 | 3.5E-06 | 8.1E-05 |
| etot | 7 | Y | N | 6 | M | -990.38336784090 | 4.3E-06  | 0.0E+00 | 0.0E+00 |

Energy components, in hartrees:

|     |                               |                   |       |
|-----|-------------------------------|-------------------|-------|
| (A) | Nuclear repulsion.....        | 1978.36560305571  |       |
| (E) | Total one-electron terms..... | -5274.81755689824 |       |
| (I) | Total two-electron terms..... | 2306.06858600163  |       |
| (L) | Electronic energy.....        | -2968.74897089661 | (E+I) |
| (N) | Total energy.....             | -990.38336784090  | (A+L) |

SCFE: SCF energy: HF -990.38336784090 hartrees iterations:

7

HOMO energy: -0.26814  
LUMO energy: 0.09639

Orbital energies:

|           |           |           |           |           |           |
|-----------|-----------|-----------|-----------|-----------|-----------|
| -15.60547 | -15.56550 | -11.29770 | -11.28619 | -11.27078 | -11.25022 |
| -11.24528 | -11.24450 | -11.23825 | -11.23745 | -11.23449 | -11.23301 |
| -11.23221 | -11.23109 | -11.23069 | -11.23034 | -11.22948 | -11.22838 |
| -11.22673 | -11.22459 | -11.22253 | -11.21876 | -11.21686 | -11.21593 |
| -11.21192 | -1.32742  | -1.24676  | -1.17463  | -1.17229  | -1.14078  |
| -1.07809  | -1.07260  | -1.04756  | -1.02329  | -1.02291  | -1.02144  |
| -0.97578  | -0.95637  | -0.93529  | -0.86214  | -0.84435  | -0.83597  |
| -0.83375  | -0.80916  | -0.79677  | -0.77365  | -0.73422  | -0.72183  |
| -0.70571  | -0.70299  | -0.66886  | -0.65951  | -0.64726  | -0.64126  |
| -0.63446  | -0.62424  | -0.62327  | -0.61823  | -0.59835  | -0.59393  |
| -0.59044  | -0.58890  | -0.58373  | -0.56063  | -0.55582  | -0.54996  |
| -0.54261  | -0.52147  | -0.51054  | -0.50427  | -0.50252  | -0.49989  |
| -0.49515  | -0.49181  | -0.48895  | -0.48236  | -0.42870  | -0.40579  |
| -0.37068  | -0.34887  | -0.34027  | -0.33992  | -0.33265  | -0.28268  |
| -0.26814  | 0.09639   | 0.13129   | 0.13834   | 0.14272   | 0.15301   |
| 0.18158   | 0.21027   | 0.22587   | 0.23576   | 0.24199   |           |

end of program scf

start of program derla

end of program derla

start of program rwr

end of program rwr

start of program der1b

forces (hartrees/bohr) : total

| atom | label | x             | y             | z             |
|------|-------|---------------|---------------|---------------|
| 1    | N1    | 2.088108E-03  | -1.816608E-03 | -3.641703E-03 |
| 2    | N2    | 1.359145E-02  | 2.603072E-03  | -9.392358E-03 |
| 3    | C4    | 4.660404E-04  | -1.020443E-02 | -2.510234E-03 |
| 4    | C5    | -1.216198E-02 | -6.585574E-03 | 6.161446E-03  |
| 5    | C6    | 7.087680E-03  | -4.398158E-04 | -6.447246E-03 |
| 6    | C7    | -3.899426E-03 | 5.933573E-03  | 2.324081E-03  |
| 7    | C13   | 3.821605E-03  | 5.890252E-03  | 1.357044E-02  |
| 8    | H4    | 2.973135E-04  | 4.132462E-04  | 7.230307E-05  |
| 9    | C8    | -6.397915E-03 | -7.377681E-03 | 4.298384E-03  |
| 10   | C11   | 3.207322E-03  | 5.420828E-03  | 1.334689E-03  |
| 11   | H7    | 6.085201E-04  | 2.998135E-05  | -7.440425E-04 |
| 12   | C9    | -3.822426E-04 | 8.286041E-03  | 2.243006E-03  |
| 13   | H8    | 2.340008E-04  | 7.691603E-04  | 4.906764E-04  |
| 14   | C10   | -1.938760E-03 | -6.468270E-04 | 1.244062E-03  |
| 15   | C12   | -6.102382E-03 | -1.064691E-03 | 1.815286E-03  |
| 16   | C2    | -8.753000E-03 | -6.468478E-03 | 1.178688E-02  |



|       |       |               |               |               |
|-------|-------|---------------|---------------|---------------|
| 17    | H13   | 5.162556E-03  | 1.641355E-03  | 3.634586E-03  |
| 18    | C14   | 3.407200E-03  | -1.591991E-03 | 8.898751E-03  |
| 19    | H15   | -2.336800E-03 | -4.255029E-03 | -1.094404E-03 |
| 20    | C15   | -8.884359E-03 | -7.898080E-04 | -1.509099E-02 |
| 21    | C16   | 1.333100E-02  | 6.137570E-03  | 1.627549E-03  |
| 22    | C17   | -1.655284E-02 | -9.413400E-03 | 8.281097E-03  |
| 23    | C18   | -2.099264E-02 | -9.634396E-03 | -4.550000E-03 |
| 24    | C19   | 1.119810E-02  | 6.856261E-03  | -8.067226E-03 |
| 25    | H16   | 4.778835E-03  | 6.395915E-04  | 1.815445E-03  |
| 26    | H17   | -2.269290E-03 | -3.734078E-04 | 2.039251E-03  |
| 27    | H18   | 1.898389E-03  | 2.441004E-03  | -7.736249E-04 |
| 28    | H19   | 4.019581E-03  | 1.995855E-03  | -3.556696E-03 |
| 29    | H20   | 5.225823E-04  | 1.660109E-03  | -3.684042E-03 |
| 30    | C1    | -1.526528E-04 | -1.293907E-03 | 5.029993E-03  |
| 31    | H5    | 3.804775E-03  | 3.806220E-04  | 3.734436E-04  |
| 32    | H6    | 1.802152E-04  | 1.858511E-03  | -4.200778E-03 |
| 33    | C3    | 1.062426E-02  | 8.644818E-03  | -1.207225E-02 |
| 34    | C26   | 1.147070E-02  | 1.162699E-02  | 1.033083E-02  |
| 35    | C27   | 4.957450E-03  | -1.858617E-04 | -2.536308E-02 |
| 36    | C28   | -9.660113E-03 | -1.041083E-02 | -8.949314E-03 |
| 37    | C29   | -5.181304E-03 | -1.111879E-03 | 2.398876E-02  |
| 38    | H1    | -3.259171E-04 | 1.476531E-03  | 1.312592E-02  |
| 39    | H2    | -4.697105E-03 | -3.791650E-03 | -6.595315E-03 |
| 40    | H3    | -5.870500E-04 | -1.164633E-03 | -1.251753E-02 |
| 41    | H9    | 4.371697E-03  | 4.237461E-03  | 6.763454E-03  |
| 42    | H10   | 1.379739E-03  | 7.800523E-04  | -2.571094E-03 |
| 43    | H25   | -3.342425E-04 | -4.287707E-04 | 6.210274E-04  |
| ----- |       |               |               |               |
|       | total | 8.991054E-04  | 6.732157E-04  | 4.943495E-05  |

end of program derlb

start of program geopt 4

geometry optimization step 4

reading input hessian of dimension 129

in five columns format

reading input hessian of dimension 129

in five columns format

\*\* restarting optimization from step 3 \*\*

Level shifts adjusted to satisfy step-size constraints

Step size: 0.3000460

Cos(theta): 0.3075896

Final level shift: -4.9937562E-03

energy change: 6.4258E-03 . ( 5.0000E-05 )

gradient maximum: 9.9076E-03 . ( 4.5000E-04 )

gradient rms: 2.3236E-03 . ( 3.0000E-04 )

step size: 0.29978 trust radius: 0.30000  
 displacement maximum: 1.5805E-01 . ( 1.8000E-03 )  
 displacement rms: 2.3553E-02 . ( 1.2000E-03 )  
 predicted energy change: -1.5876E-03 geom step: 2.9978E-01  
 full step: 2.9978E-01  
 molecular structure not yet converged...

center of mass moved by:

x: -2.4980E-16 y: -3.4694E-17 z: -6.1062E-16

new geometry:

|      | angstroms     |               |               |
|------|---------------|---------------|---------------|
| atom | x             | y             | z             |
| N1   | -0.2605037549 | 0.4125439612  | 1.1900034197  |
| N2   | -1.0201882848 | -2.3117451892 | 1.2286465763  |
| C4   | -1.2291547382 | -0.0501813353 | 2.0213210471  |
| C5   | -0.0584840655 | -1.9323738777 | 0.5045877913  |
| C6   | -1.6433405541 | -1.3707651498 | 2.0724302477  |
| C7   | -1.7196322432 | 0.9707097685  | 2.8115399710  |
| C13  | 0.6123641543  | -2.9395135162 | -0.4045486213 |
| H4   | -3.0004875650 | -2.6843033639 | 3.0337672096  |
| C8   | -2.7502677659 | 0.6466074665  | 3.7128944205  |
| C11  | -0.9641692572 | 2.1368330189  | 2.4248916539  |
| H7   | -3.1870956384 | 1.3938929758  | 4.3523390576  |
| C9   | -3.1923609494 | -0.6577264470 | 3.7717764284  |
| H8   | -3.9791920871 | -0.9171763497 | 4.4577173169  |
| C10  | -2.6430824576 | -1.6735110866 | 2.9607130298  |
| C12  | -0.0894151548 | 1.7589272383  | 1.4540514090  |
| C2   | 0.8975931598  | 2.5804167511  | 0.7178403216  |
| H13  | 1.6900885460  | -2.9175445528 | -0.2351375024 |
| C14  | 0.3269913213  | -2.6769735270 | -1.8741990189 |
| H15  | 0.2546697460  | -3.9228910664 | -0.1143387386 |
| C15  | -0.2180137009 | -2.2191864228 | -4.5767173828 |
| C16  | 1.3496559462  | -2.4227648804 | -2.7664884238 |
| C17  | -0.9764471114 | -2.6992027704 | -2.3557447632 |
| C18  | -1.2462393835 | -2.4742543646 | -3.6931624843 |
| C19  | 1.0776231861  | -2.1937356607 | -4.1071135875 |
| H16  | 2.3658535888  | -2.4078532060 | -2.4199820995 |
| H17  | -1.7766859001 | -2.8933381124 | -1.6738564557 |
| H18  | -2.2487902734 | -2.4928964715 | -4.0444386495 |
| H19  | 1.8875121812  | -1.9993966839 | -4.7814773829 |
| H20  | -0.4271057620 | -2.0495195336 | -5.6159740449 |
| C1   | 0.5363502956  | -0.5262371704 | 0.4297996206  |
| H5   | 1.5569005697  | -0.5698600523 | 0.8077454585  |
| H6   | 0.5969268301  | -0.2400532601 | -0.6132951547 |
| C3   | 2.7366658910  | 4.1635728363  | -0.6570139302 |
| C26  | 1.8494198086  | 3.3298911691  | 1.4147477126  |
| C27  | 0.8738252674  | 2.6383115327  | -0.6774631325 |
| C28  | 1.7919425574  | 3.4195085202  | -1.3586689873 |
| C29  | 2.7597734096  | 4.1195096692  | 0.7311384976  |
| H1   | 1.8863612505  | 3.2798815381  | 2.4949515492  |
| H2   | 0.1256541849  | 2.0873284863  | -1.2299565889 |

|     |               |              |               |
|-----|---------------|--------------|---------------|
| H3  | 1.7610423948  | 3.4526209625 | -2.4364084657 |
| H9  | 3.4896654651  | 4.6919589348 | 1.2854978074  |
| H10 | 3.4478987066  | 4.7719686917 | -1.1860693938 |
| H25 | -1.0742926529 | 3.1373751310 | 2.7923517727  |

nuclear repulsion energy..... 1974.668059347 hartrees

-----  
 / end of geometry optimization iteration 4 /  
 -----

end of program geopt

start of program onee  
 smallest eigenvalue of S: 2.817E-04  
 number of canonical orbitals..... 461  
 end of program onee

start of program probe  
 end of program probe

start of program grid

number of gridpoints:

| atom     | N1  | N2  | C4  | C5  | C6  | C7  | C13 |
|----------|-----|-----|-----|-----|-----|-----|-----|
| H4       |     |     |     |     |     |     |     |
| grid # 1 | 97  | 102 | 87  | 88  | 90  | 88  | 84  |
| 73       |     |     |     |     |     |     |     |
| grid # 2 | 104 | 112 | 95  | 95  | 99  | 98  | 92  |
| 118      |     |     |     |     |     |     |     |
| grid # 3 | 214 | 227 | 195 | 186 | 191 | 200 | 164 |
| 224      |     |     |     |     |     |     |     |
| grid # 4 | 389 | 414 | 320 | 320 | 324 | 347 | 299 |
| 224      |     |     |     |     |     |     |     |

number of gridpoints:

| atom     | C8  | C11 | H7  | C9  | H8  | C10 | C12 |
|----------|-----|-----|-----|-----|-----|-----|-----|
| C2       |     |     |     |     |     |     |     |
| grid # 1 | 89  | 86  | 73  | 87  | 73  | 89  | 84  |
| 92       |     |     |     |     |     |     |     |
| grid # 2 | 97  | 94  | 118 | 97  | 118 | 97  | 95  |
| 100      |     |     |     |     |     |     |     |
| grid # 3 | 184 | 185 | 223 | 184 | 222 | 184 | 195 |
| 196      |     |     |     |     |     |     |     |
| grid # 4 | 330 | 330 | 226 | 331 | 223 | 327 | 321 |
| 343      |     |     |     |     |     |     |     |

number of gridpoints:

| atom | H13 | C14 | H15 | C15 | C16 | C17 | C18 |
|------|-----|-----|-----|-----|-----|-----|-----|
| C19  |     |     |     |     |     |     |     |

|          |    |    |    |    |    |    |    |
|----------|----|----|----|----|----|----|----|
| grid # 1 | 69 | 91 | 69 | 89 | 88 | 86 | 89 |
|----------|----|----|----|----|----|----|----|

87

|          |     |     |     |    |    |    |    |
|----------|-----|-----|-----|----|----|----|----|
| grid # 2 | 110 | 100 | 110 | 97 | 96 | 96 | 97 |
|----------|-----|-----|-----|----|----|----|----|

96

|          |     |     |     |     |     |     |     |
|----------|-----|-----|-----|-----|-----|-----|-----|
| grid # 3 | 210 | 196 | 218 | 182 | 183 | 183 | 183 |
|----------|-----|-----|-----|-----|-----|-----|-----|

182

|          |     |     |     |     |     |     |     |
|----------|-----|-----|-----|-----|-----|-----|-----|
| grid # 4 | 215 | 342 | 217 | 327 | 327 | 327 | 327 |
|----------|-----|-----|-----|-----|-----|-----|-----|

327

number of gridpoints:

|      |     |     |     |     |     |    |    |
|------|-----|-----|-----|-----|-----|----|----|
| atom | H16 | H17 | H18 | H19 | H20 | C1 | H5 |
|------|-----|-----|-----|-----|-----|----|----|

H6

|          |    |    |    |    |    |    |    |
|----------|----|----|----|----|----|----|----|
| grid # 1 | 73 | 73 | 73 | 73 | 73 | 82 | 70 |
|----------|----|----|----|----|----|----|----|

69

|          |     |     |     |     |     |    |     |
|----------|-----|-----|-----|-----|-----|----|-----|
| grid # 2 | 113 | 115 | 118 | 118 | 118 | 88 | 109 |
|----------|-----|-----|-----|-----|-----|----|-----|

105

|          |     |     |     |     |     |     |     |
|----------|-----|-----|-----|-----|-----|-----|-----|
| grid # 3 | 214 | 216 | 222 | 221 | 223 | 165 | 217 |
|----------|-----|-----|-----|-----|-----|-----|-----|

208

|          |     |     |     |     |     |     |     |
|----------|-----|-----|-----|-----|-----|-----|-----|
| grid # 4 | 213 | 214 | 223 | 222 | 224 | 290 | 217 |
|----------|-----|-----|-----|-----|-----|-----|-----|

206

number of gridpoints:

|      |    |     |     |     |     |    |    |
|------|----|-----|-----|-----|-----|----|----|
| atom | C3 | C26 | C27 | C28 | C29 | H1 | H2 |
|------|----|-----|-----|-----|-----|----|----|

H3

|          |    |    |    |    |    |    |    |
|----------|----|----|----|----|----|----|----|
| grid # 1 | 89 | 89 | 88 | 89 | 89 | 73 | 71 |
|----------|----|----|----|----|----|----|----|

73

|          |    |    |    |    |    |     |     |
|----------|----|----|----|----|----|-----|-----|
| grid # 2 | 97 | 95 | 96 | 97 | 97 | 115 | 114 |
|----------|----|----|----|----|----|-----|-----|

118

|          |     |     |     |     |     |     |     |
|----------|-----|-----|-----|-----|-----|-----|-----|
| grid # 3 | 185 | 182 | 185 | 184 | 184 | 218 | 216 |
|----------|-----|-----|-----|-----|-----|-----|-----|

223

|          |     |     |     |     |     |     |     |
|----------|-----|-----|-----|-----|-----|-----|-----|
| grid # 4 | 330 | 328 | 329 | 328 | 329 | 219 | 214 |
|----------|-----|-----|-----|-----|-----|-----|-----|

223

number of gridpoints:

|          |     |     |     |       |
|----------|-----|-----|-----|-------|
| atom     | H9  | H10 | H25 | total |
| grid # 1 | 73  | 73  | 73  | 3516  |
| grid # 2 | 118 | 118 | 115 | 4495  |
| grid # 3 | 223 | 224 | 221 | 8642  |
| grid # 4 | 224 | 224 | 224 | 12258 |

end of program grid

start of program rwr  
end of program rwr

start of program scf

|   |   |   |   |   |        |                             |
|---|---|---|---|---|--------|-----------------------------|
| i | u | d | i | g |        |                             |
| t | p | i | c | r |        |                             |
| e | d | i | u | i | energy | RMS maximum<br>density DIIS |

|      | r | t | s | t | d | total energy     | change  | change  | error   |
|------|---|---|---|---|---|------------------|---------|---------|---------|
| etot | 1 | N | N | 2 | U | -990.14145563547 |         | 7.8E-04 | 3.9E-02 |
| etot | 2 | Y | Y | 6 | M | -990.35861329482 | 2.2E-01 | 3.9E-04 | 1.6E-02 |
| etot | 3 | N | Y | 2 | U | -990.38809039062 | 2.9E-02 | 1.2E-04 | 3.9E-03 |
| etot | 4 | Y | Y | 6 | M | -990.38982038619 | 1.7E-03 | 4.1E-05 | 1.2E-03 |
| etot | 5 | Y | Y | 6 | M | -990.39009100052 | 2.7E-04 | 1.6E-05 | 3.2E-04 |
| etot | 6 | N | Y | 2 | U | -990.39013660923 | 4.6E-05 | 5.8E-06 | 1.0E-04 |
| etot | 7 | Y | Y | 6 | M | -990.39013977366 | 3.2E-06 | 2.4E-06 | 3.6E-05 |
| etot | 8 | Y | N | 6 | M | -990.39014043744 | 6.6E-07 | 0.0E+00 | 0.0E+00 |

Energy components, in hartrees:

|     |                               |                   |       |
|-----|-------------------------------|-------------------|-------|
| (A) | Nuclear repulsion.....        | 1974.66805934711  |       |
| (E) | Total one-electron terms..... | -5267.59739614095 |       |
| (I) | Total two-electron terms..... | 2302.53919635640  |       |
| (L) | Electronic energy.....        | -2965.05819978455 | (E+I) |
| (N) | Total energy.....             | -990.39014043744  | (A+L) |

SCFE: SCF energy: HF -990.39014043744 hartrees iterations:

8

HOMO energy: -0.26872  
LUMO energy: 0.09755

Orbital energies:

|           |           |           |           |           |           |
|-----------|-----------|-----------|-----------|-----------|-----------|
| -15.60449 | -15.56529 | -11.29607 | -11.28604 | -11.27093 | -11.25222 |
| -11.25039 | -11.24527 | -11.24459 | -11.24123 | -11.24070 | -11.24044 |
| -11.24005 | -11.23923 | -11.23844 | -11.23434 | -11.23294 | -11.23235 |
| -11.23098 | -11.22932 | -11.22452 | -11.21957 | -11.21815 | -11.21574 |
| -11.21231 | -1.32548  | -1.24923  | -1.16438  | -1.16096  | -1.13857  |
| -1.07363  | -1.06865  | -1.03835  | -1.02173  | -1.02055  | -1.01749  |
| -0.97069  | -0.95517  | -0.93360  | -0.86029  | -0.83635  | -0.83387  |
| -0.83017  | -0.80766  | -0.79576  | -0.76982  | -0.73217  | -0.71750  |
| -0.70155  | -0.70000  | -0.66622  | -0.65729  | -0.64350  | -0.63778  |
| -0.63371  | -0.62436  | -0.62014  | -0.61563  | -0.59577  | -0.59197  |
| -0.59045  | -0.58757  | -0.58039  | -0.55733  | -0.55239  | -0.54828  |
| -0.54513  | -0.51672  | -0.50646  | -0.50304  | -0.50031  | -0.49689  |
| -0.49432  | -0.49097  | -0.48728  | -0.48190  | -0.42913  | -0.40459  |
| -0.36595  | -0.34214  | -0.34166  | -0.33817  | -0.33118  | -0.28287  |
| -0.26872  | 0.09755   | 0.12906   | 0.13686   | 0.13760   | 0.14839   |
| 0.17922   | 0.20764   | 0.22771   | 0.23529   | 0.24258   |           |

end of program scf

start of program derla  
end of program derla

start of program rwr

end of program rwr

start of program der1b

forces (hartrees/bohr) : total

| atom | label | x             | y             | z             |
|------|-------|---------------|---------------|---------------|
| 1    | N1    | 1.722647E-04  | -1.371273E-03 | -2.097232E-03 |
| 2    | N2    | 2.307619E-03  | 2.645434E-04  | -1.429536E-03 |
| 3    | C4    | 9.233719E-04  | -1.909727E-03 | -3.397651E-04 |
| 4    | C5    | -2.472205E-03 | -1.364835E-03 | 1.074612E-03  |
| 5    | C6    | 9.104396E-04  | -8.696098E-04 | -8.667630E-04 |
| 6    | C7    | -2.264358E-03 | 1.987665E-03  | 9.229630E-04  |
| 7    | C13   | 1.704094E-05  | -1.512183E-03 | 1.932501E-03  |
| 8    | H4    | -1.303564E-04 | -3.601330E-04 | 6.584231E-05  |
| 9    | C8    | -2.402673E-04 | -8.558610E-04 | 6.577247E-04  |
| 10   | C11   | 1.082298E-03  | 1.304216E-03  | 5.319032E-04  |
| 11   | H7    | 2.368012E-04  | 2.173179E-04  | -3.217904E-04 |
| 12   | C9    | 5.433283E-04  | 1.494368E-03  | -2.250984E-04 |
| 13   | H8    | -7.318402E-06 | 9.919423E-05  | 2.294528E-04  |
| 14   | C10   | -3.416522E-04 | -3.416849E-04 | 3.024806E-05  |
| 15   | C12   | 5.998397E-04  | 6.585509E-04  | 7.717878E-04  |
| 16   | C2    | 1.338325E-03  | 2.564232E-03  | 7.609119E-04  |
| 17   | H13   | -2.445629E-03 | 3.019296E-04  | -7.005633E-04 |
| 18   | C14   | -1.006014E-03 | -2.287806E-03 | 2.671755E-03  |
| 19   | H15   | 3.635537E-04  | 1.884244E-03  | -9.943853E-04 |
| 20   | C15   | 2.027062E-03  | 2.500076E-04  | -2.559217E-03 |
| 21   | C16   | 2.727088E-03  | 1.063025E-03  | -3.560983E-03 |
| 22   | C17   | -9.564304E-04 | -6.952268E-05 | -1.579709E-04 |
| 23   | C18   | 2.482024E-03  | -4.635361E-04 | 6.616306E-03  |
| 24   | C19   | 5.817905E-03  | 2.160421E-04  | -5.459483E-04 |
| 25   | H16   | 2.531985E-03  | 4.057878E-04  | 1.288178E-04  |
| 26   | H17   | -4.824063E-03 | -1.082739E-03 | 2.997523E-03  |
| 27   | H18   | -1.047403E-02 | -7.737787E-04 | -2.242630E-03 |
| 28   | H19   | 2.831240E-03  | 6.714518E-04  | -2.296848E-03 |
| 29   | H20   | 2.548070E-04  | 7.177312E-04  | -1.647014E-03 |
| 30   | C1    | 4.326349E-04  | 1.117342E-03  | 1.134530E-03  |
| 31   | H5    | 3.099164E-04  | 3.869422E-04  | -1.953429E-05 |
| 32   | H6    | -4.484517E-05 | 5.228931E-04  | 6.438714E-04  |
| 33   | C3    | -2.488043E-03 | -2.181722E-03 | 6.024058E-04  |
| 34   | C26   | -2.683586E-03 | -2.958448E-03 | 1.442213E-03  |
| 35   | C27   | 2.666601E-04  | -4.104175E-04 | 1.506358E-03  |
| 36   | C28   | 2.305602E-03  | 2.215407E-03  | 4.983410E-04  |
| 37   | C29   | 8.628620E-04  | 7.523044E-04  | -1.843323E-03 |
| 38   | H1    | -1.674844E-03 | -2.410790E-04 | -4.984929E-03 |
| 39   | H2    | 2.525584E-03  | 1.790540E-03  | 2.833707E-03  |
| 40   | H3    | 8.433839E-04  | 7.493248E-04  | 2.107534E-03  |
| 41   | H9    | -2.068308E-03 | -1.653712E-03 | -2.587104E-03 |
| 42   | H10   | 8.221141E-05  | 1.717202E-04  | -7.402267E-04 |
| 43   | H25   | -1.315526E-04 | -2.308952E-04 | -4.026906E-05 |

```

-----
total      5.423385E-04    8.678193E-04   -3.982191E-05

```

end of program derlb

start of program geopt 5

geometry optimization step 5

reading input hessian of dimension 129

in five columns format

reading input hessian of dimension 129

in five columns format

Level shifts adjusted to satisfy step-size constraints

Step size: 0.3001034

Cos(theta): 0.4746771

Final level shift: -1.8111015E-02

energy change: -3.4678E-04 . ( 5.0000E-05 )

gradient maximum: 1.0656E-02 . ( 4.5000E-04 )

gradient rms: 2.1734E-03 . ( 3.0000E-04 )

step size: 0.29956 trust radius: 0.30000

displacement maximum: 1.2495E-01 . ( 1.8000E-03 )

displacement rms: 2.3536E-02 . ( 1.2000E-03 )

predicted energy change: -2.7815E-03 geom step: 2.9956E-

01 full step: 2.9956E-01

molecular structure not yet converged...

center of mass moved by:

x: 8.1464E-03 y: 6.0566E-03 z: -8.7285E-03

new geometry:

|      | angstroms     |               |               |
|------|---------------|---------------|---------------|
| atom | x             | y             | z             |
| N1   | -0.2292024469 | 0.4427015271  | 1.1628880103  |
| N2   | -0.9782568628 | -2.2878207032 | 1.1779266582  |
| C4   | -1.2094337002 | -0.0303642055 | 1.9757531149  |
| C5   | -0.0161249279 | -1.9029247248 | 0.4674816553  |
| C6   | -1.6194223744 | -1.3523145475 | 2.0109279641  |
| C7   | -1.7211646352 | 0.9868621882  | 2.7632723068  |
| C13  | 0.6544591552  | -2.9143021590 | -0.4408657883 |
| H4   | -2.9999077625 | -2.6718770241 | 2.9344446436  |
| C8   | -2.7718199836 | 0.6572998838  | 3.6401084653  |
| C11  | -0.9491404552 | 2.1543222696  | 2.4120276559  |
| H7   | -3.2211900614 | 1.4029180697  | 4.2716980948  |
| C9   | -3.2132989134 | -0.6466971041 | 3.6786741679  |
| H8   | -4.0163262814 | -0.9105012423 | 4.3442732707  |
| C10  | -2.6416683415 | -1.6597368984 | 2.8743855662  |
| C12  | -0.0562922792 | 1.7860587709  | 1.4560571753  |

|     |               |               |               |
|-----|---------------|---------------|---------------|
| C2  | 0.9488951143  | 2.6311226377  | 0.7701830808  |
| H13 | 1.7281674582  | -2.8468821058 | -0.3270846920 |
| C14 | 0.2937960086  | -2.7261589105 | -1.9088007454 |
| H15 | 0.3445375745  | -3.8922911028 | -0.1088900635 |
| C15 | -0.4402906415 | -2.3952792758 | -4.5794029238 |
| C16 | 1.2395116030  | -2.3428910048 | -2.8630371971 |
| C17 | -1.0270889510 | -2.9533277298 | -2.3085099819 |
| C18 | -1.3921717180 | -2.7920309200 | -3.6337066705 |
| C19 | 0.8788052648  | -2.1725843519 | -4.1956505663 |
| H16 | 2.2638244085  | -2.1880678707 | -2.5683467508 |
| H17 | -1.7675239977 | -3.2630084538 | -1.5767242550 |
| H18 | -2.4257099259 | -2.9929594166 | -3.9302355350 |
| H19 | 1.6217050002  | -1.8773108746 | -4.9256653884 |
| H20 | -0.7280733175 | -2.2675932286 | -5.6111620858 |
| C1  | 0.5821138301  | -0.4915229124 | 0.4118188533  |
| H5  | 1.5989978845  | -0.5325329495 | 0.8024327801  |
| H6  | 0.6562234427  | -0.2012124645 | -0.6287278123 |
| C3  | 2.8551861345  | 4.2505727705  | -0.4749461088 |
| C26 | 1.7771405951  | 3.4522098043  | 1.5201834275  |
| C27 | 1.0866007330  | 2.6404146539  | -0.6152847579 |
| C28 | 2.0341472297  | 3.4391158849  | -1.2329113044 |
| C29 | 2.7192766740  | 4.2587160999  | 0.9026633710  |
| H1  | 1.6846480152  | 3.4442277353  | 2.5858043452  |
| H2  | 0.4363216332  | 2.0366757013  | -1.2116377193 |
| H3  | 2.1295952060  | 3.4333746931  | -2.3030217836 |
| H9  | 3.3514260736  | 4.8860237979  | 1.4956835722  |
| H10 | 3.5921450310  | 4.8707133033  | -0.9544874007 |
| H25 | -1.0689547267 | 3.1499012113  | 2.7877233660  |

nuclear repulsion energy..... 1967.972340116 hartrees

/ end of geometry optimization iteration 5 /

end of program geopt

start of program onee  
smallest eigenvalue of S: 2.829E-04  
number of canonical orbitals..... 461  
end of program onee

start of program probe  
end of program probe

start of program grid

number of gridpoints:

| atom | N1 | N2 | C4 | C5 | C6 | C7 | C13 |
|------|----|----|----|----|----|----|-----|
| H4   |    |    |    |    |    |    |     |



|          |    |     |    |    |    |    |    |
|----------|----|-----|----|----|----|----|----|
| grid # 1 | 95 | 102 | 87 | 88 | 90 | 90 | 84 |
|----------|----|-----|----|----|----|----|----|

73

|          |     |     |    |    |    |    |    |
|----------|-----|-----|----|----|----|----|----|
| grid # 2 | 103 | 112 | 95 | 95 | 99 | 98 | 92 |
|----------|-----|-----|----|----|----|----|----|

118

|          |     |     |     |     |     |     |     |
|----------|-----|-----|-----|-----|-----|-----|-----|
| grid # 3 | 212 | 227 | 195 | 188 | 190 | 199 | 163 |
|----------|-----|-----|-----|-----|-----|-----|-----|

224

|          |     |     |     |     |     |     |     |
|----------|-----|-----|-----|-----|-----|-----|-----|
| grid # 4 | 386 | 413 | 321 | 320 | 321 | 348 | 300 |
|----------|-----|-----|-----|-----|-----|-----|-----|

224

|                       |    |     |    |    |    |     |     |
|-----------------------|----|-----|----|----|----|-----|-----|
| number of gridpoints: |    |     |    |    |    |     |     |
| atom                  | C8 | C11 | H7 | C9 | H8 | C10 | C12 |

C2

|          |    |    |    |    |    |    |    |
|----------|----|----|----|----|----|----|----|
| grid # 1 | 89 | 87 | 73 | 87 | 73 | 89 | 86 |
|----------|----|----|----|----|----|----|----|

92

|          |    |    |     |    |     |    |    |
|----------|----|----|-----|----|-----|----|----|
| grid # 2 | 97 | 94 | 118 | 97 | 118 | 97 | 95 |
|----------|----|----|-----|----|-----|----|----|

100

|          |     |     |     |     |     |     |     |
|----------|-----|-----|-----|-----|-----|-----|-----|
| grid # 3 | 184 | 185 | 223 | 184 | 222 | 184 | 195 |
|----------|-----|-----|-----|-----|-----|-----|-----|

195

|          |     |     |     |     |     |     |     |
|----------|-----|-----|-----|-----|-----|-----|-----|
| grid # 4 | 328 | 330 | 226 | 331 | 223 | 327 | 320 |
|----------|-----|-----|-----|-----|-----|-----|-----|

340

|                       |     |     |     |     |     |     |     |
|-----------------------|-----|-----|-----|-----|-----|-----|-----|
| number of gridpoints: |     |     |     |     |     |     |     |
| atom                  | H13 | C14 | H15 | C15 | C16 | C17 | C18 |

C19

|          |    |    |    |    |    |    |    |
|----------|----|----|----|----|----|----|----|
| grid # 1 | 69 | 93 | 69 | 89 | 88 | 88 | 89 |
|----------|----|----|----|----|----|----|----|

89

|          |     |     |     |    |    |    |    |
|----------|-----|-----|-----|----|----|----|----|
| grid # 2 | 109 | 100 | 110 | 97 | 96 | 96 | 97 |
|----------|-----|-----|-----|----|----|----|----|

96

|          |     |     |     |     |     |     |     |
|----------|-----|-----|-----|-----|-----|-----|-----|
| grid # 3 | 211 | 198 | 213 | 185 | 185 | 184 | 185 |
|----------|-----|-----|-----|-----|-----|-----|-----|

184

|          |     |     |     |     |     |     |     |
|----------|-----|-----|-----|-----|-----|-----|-----|
| grid # 4 | 210 | 342 | 212 | 330 | 329 | 328 | 329 |
|----------|-----|-----|-----|-----|-----|-----|-----|

329

|                       |     |     |     |     |     |    |    |
|-----------------------|-----|-----|-----|-----|-----|----|----|
| number of gridpoints: |     |     |     |     |     |    |    |
| atom                  | H16 | H17 | H18 | H19 | H20 | C1 | H5 |

H6

|          |    |    |    |    |    |    |    |
|----------|----|----|----|----|----|----|----|
| grid # 1 | 72 | 72 | 73 | 73 | 73 | 82 | 70 |
|----------|----|----|----|----|----|----|----|

69

|          |     |     |     |     |     |    |     |
|----------|-----|-----|-----|-----|-----|----|-----|
| grid # 2 | 115 | 114 | 118 | 118 | 118 | 88 | 110 |
|----------|-----|-----|-----|-----|-----|----|-----|

104

|          |     |     |     |     |     |     |     |
|----------|-----|-----|-----|-----|-----|-----|-----|
| grid # 3 | 214 | 215 | 223 | 222 | 224 | 163 | 217 |
|----------|-----|-----|-----|-----|-----|-----|-----|

206

|          |     |     |     |     |     |     |     |
|----------|-----|-----|-----|-----|-----|-----|-----|
| grid # 4 | 214 | 215 | 232 | 223 | 224 | 292 | 217 |
|----------|-----|-----|-----|-----|-----|-----|-----|

204

|                       |    |     |     |     |     |    |    |
|-----------------------|----|-----|-----|-----|-----|----|----|
| number of gridpoints: |    |     |     |     |     |    |    |
| atom                  | C3 | C26 | C27 | C28 | C29 | H1 | H2 |

H3

|          |    |    |    |    |    |    |    |
|----------|----|----|----|----|----|----|----|
| grid # 1 | 89 | 87 | 88 | 89 | 89 | 72 | 70 |
|----------|----|----|----|----|----|----|----|

73

|          |    |    |    |    |    |     |     |
|----------|----|----|----|----|----|-----|-----|
| grid # 2 | 97 | 95 | 96 | 97 | 97 | 115 | 113 |
|----------|----|----|----|----|----|-----|-----|

118

|          |     |     |     |     |     |     |     |
|----------|-----|-----|-----|-----|-----|-----|-----|
| grid # 3 | 184 | 182 | 184 | 184 | 185 | 217 | 213 |
|----------|-----|-----|-----|-----|-----|-----|-----|

222

|          |     |     |     |     |     |     |     |
|----------|-----|-----|-----|-----|-----|-----|-----|
| grid # 4 | 328 | 327 | 329 | 327 | 328 | 215 | 211 |
|----------|-----|-----|-----|-----|-----|-----|-----|

224

number of gridpoints:

|          |     |     |     |       |
|----------|-----|-----|-----|-------|
| atom     | H9  | H10 | H25 | total |
| grid # 1 | 73  | 73  | 72  | 3518  |
| grid # 2 | 118 | 118 | 115 | 4493  |
| grid # 3 | 222 | 223 | 219 | 8634  |
| grid # 4 | 224 | 224 | 223 | 12248 |

end of program grid

start of program rwr  
end of program rwr

start of program scf

|  | i | u | d | i | g |              |        | RMS     | maximum |
|--|---|---|---|---|---|--------------|--------|---------|---------|
|  | t | p | i | c | r |              |        | density | DIIS    |
|  | e | d | i | u | i | energy       | change | change  | error   |
|  | r | t | s | t | d | total energy |        |         |         |

|      |   |   |   |   |   |                  |          |         |         |
|------|---|---|---|---|---|------------------|----------|---------|---------|
| etot | 1 | N | N | 2 | U | -990.30892225319 |          | 4.4E-04 | 2.7E-02 |
| etot | 2 | Y | Y | 6 | M | -990.37951017403 | 7.1E-02  | 2.2E-04 | 1.1E-02 |
| etot | 3 | N | Y | 2 | U | -990.38894674829 | 9.4E-03  | 6.5E-05 | 2.8E-03 |
| etot | 4 | Y | Y | 6 | M | -990.38948696771 | 5.4E-04  | 2.2E-05 | 8.5E-04 |
| etot | 5 | Y | Y | 6 | M | -990.38957252266 | 8.6E-05  | 9.0E-06 | 2.1E-04 |
| etot | 6 | N | Y | 2 | U | -990.38957720340 | 4.7E-06  | 3.0E-06 | 4.3E-05 |
| etot | 7 | Y | N | 6 | M | -990.38957709405 | -1.1E-07 | 0.0E+00 | 0.0E+00 |

Energy components, in hartrees:

|     |                               |                   |       |
|-----|-------------------------------|-------------------|-------|
| (A) | Nuclear repulsion.....        | 1967.97234011558  |       |
| (E) | Total one-electron terms..... | -5254.19895519368 |       |
| (I) | Total two-electron terms..... | 2295.83703798405  |       |
| (L) | Electronic energy.....        | -2958.36191720963 | (E+I) |
| (N) | Total energy.....             | -990.38957709405  | (A+L) |

SCFE: SCF energy: HF -990.38957709405 hartrees iterations:  
7

HOMO energy: -0.26884  
LUMO energy: 0.09597

Orbital energies:

|           |           |           |           |           |           |
|-----------|-----------|-----------|-----------|-----------|-----------|
| -15.60543 | -15.56487 | -11.29622 | -11.28765 | -11.27212 | -11.25108 |
| -11.25053 | -11.24792 | -11.24652 | -11.23892 | -11.23891 | -11.23883 |

|           |           |           |           |           |           |
|-----------|-----------|-----------|-----------|-----------|-----------|
| -11.23801 | -11.23777 | -11.23716 | -11.23711 | -11.23637 | -11.23587 |
| -11.23553 | -11.23260 | -11.22496 | -11.22078 | -11.21925 | -11.21651 |
| -11.21329 | -1.32543  | -1.25168  | -1.16443  | -1.15738  | -1.13804  |
| -1.07535  | -1.06529  | -1.04001  | -1.02194  | -1.01727  | -1.01663  |
| -0.97152  | -0.95322  | -0.93415  | -0.85977  | -0.83914  | -0.83253  |
| -0.82686  | -0.80677  | -0.79549  | -0.77050  | -0.73321  | -0.71759  |
| -0.70203  | -0.69559  | -0.66640  | -0.65820  | -0.64265  | -0.63725  |
| -0.63362  | -0.62320  | -0.62133  | -0.61564  | -0.59719  | -0.59253  |
| -0.59025  | -0.58763  | -0.57566  | -0.55800  | -0.55276  | -0.54852  |
| -0.54404  | -0.51815  | -0.50817  | -0.50261  | -0.50009  | -0.49525  |
| -0.49276  | -0.49132  | -0.48786  | -0.48039  | -0.42993  | -0.40500  |
| -0.36914  | -0.34440  | -0.34069  | -0.33787  | -0.32708  | -0.28199  |
| -0.26884  | 0.09597   | 0.12827   | 0.13658   | 0.13747   | 0.14798   |
| 0.17910   | 0.21010   | 0.22715   | 0.23493   | 0.24011   |           |

end of program scf

start of program derla  
end of program derla

start of program rwr  
end of program rwr

start of program derlb

forces (hartrees/bohr) : total

| atom | label | x             | y             | z             |
|------|-------|---------------|---------------|---------------|
| 1    | N1    | 1.630734E-03  | 4.147837E-04  | -2.328007E-04 |
| 2    | N2    | -4.394325E-03 | -1.352038E-03 | 2.472753E-03  |
| 3    | C4    | -1.011245E-03 | 1.568492E-03  | 3.045752E-05  |
| 4    | C5    | 4.998187E-03  | 1.221166E-03  | -4.075432E-03 |
| 5    | C6    | -2.039398E-03 | -4.311267E-04 | 1.780415E-03  |
| 6    | C7    | 6.101085E-05  | -2.060345E-04 | 7.720866E-04  |
| 7    | C13   | 4.203179E-04  | 3.755701E-03  | -3.272974E-03 |
| 8    | H4    | 5.925810E-05  | 2.078679E-04  | 8.546451E-05  |
| 9    | C8    | 1.534280E-03  | -1.965932E-04 | -1.082552E-03 |
| 10   | C11   | -1.931759E-03 | -9.908874E-04 | 6.215361E-04  |
| 11   | H7    | -1.775814E-04 | 1.464387E-04  | 1.739668E-04  |
| 12   | C9    | 7.213503E-04  | -1.263375E-03 | -1.016812E-03 |
| 13   | H8    | 1.282530E-04  | -1.587411E-04 | 7.876069E-06  |
| 14   | C10   | -2.470540E-04 | 1.260490E-03  | 7.692993E-04  |
| 15   | C12   | 1.453405E-03  | 1.325890E-03  | -3.933628E-03 |
| 16   | C2    | -1.019141E-03 | -2.748754E-03 | -8.869362E-04 |
| 17   | H13   | 4.139215E-03  | 1.790964E-04  | 9.518011E-04  |
| 18   | C14   | -1.890313E-03 | 5.889275E-04  | -2.220388E-03 |
| 19   | H15   | -5.789694E-04 | -2.664568E-03 | 1.096563E-03  |
| 20   | C15   | -1.086856E-03 | -8.299807E-04 | 2.186525E-03  |

|       |       |               |               |               |
|-------|-------|---------------|---------------|---------------|
| 21    | C16   | -5.200446E-03 | -1.943274E-03 | 4.012439E-03  |
| 22    | C17   | 1.011256E-03  | -1.508706E-04 | 6.361840E-04  |
| 23    | C18   | -3.123879E-03 | -7.158290E-04 | -6.583892E-03 |
| 24    | C19   | -7.063939E-03 | -2.062728E-03 | 8.090705E-04  |
| 25    | H16   | -2.103718E-04 | 4.707942E-04  | 8.553744E-04  |
| 26    | H17   | 5.839874E-03  | 2.613085E-03  | -4.175018E-03 |
| 27    | H18   | 1.242488E-02  | 3.786442E-03  | 1.561713E-03  |
| 28    | H19   | -3.859295E-03 | -1.242690E-03 | 3.275097E-03  |
| 29    | H20   | 2.965080E-04  | -4.598800E-04 | 1.965477E-03  |
| 30    | C1    | 1.066212E-04  | -1.197430E-03 | 2.415771E-04  |
| 31    | H5    | -6.245271E-04 | -2.326934E-04 | 4.699059E-05  |
| 32    | H6    | -9.647908E-05 | 1.200227E-04  | 3.096240E-06  |
| 33    | C3    | 2.194370E-03  | 2.154896E-03  | 1.522594E-03  |
| 34    | C26   | 2.819150E-03  | 2.857859E-03  | -7.306075E-04 |
| 35    | C27   | -1.348596E-04 | -3.131549E-04 | -4.776516E-04 |
| 36    | C28   | -2.416145E-03 | -2.441204E-03 | -9.400507E-04 |
| 37    | C29   | -1.201260E-03 | -6.874415E-04 | 9.218558E-06  |
| 38    | H1    | 7.430163E-04  | 7.420055E-04  | 4.313428E-03  |
| 39    | H2    | -2.921308E-03 | -2.500431E-03 | -3.182915E-03 |
| 40    | H3    | -1.090762E-03 | -7.223903E-04 | -1.231965E-03 |
| 41    | H9    | 2.552610E-03  | 2.455616E-03  | 3.038091E-03  |
| 42    | H10   | 7.688328E-05  | 2.110463E-04  | 6.463850E-04  |
| 43    | H25   | 1.247264E-05  | 2.472986E-04  | 8.043307E-05  |
| ----- |       |               |               |               |
|       | total | 9.037392E-04  | 8.158031E-04  | -7.771103E-05 |

end of program derlb

start of program geopt 6

geometry optimization step 6

reading input hessian of dimension 129

in five columns format

reading input hessian of dimension 129

in five columns format

Level shifts adjusted to satisfy step-size constraints

Step size: 0.3005785

Cos(theta): 0.4030506

Final level shift: -1.2859045E-02

energy change: 5.6334E-04 . ( 5.0000E-05 )

gradient maximum: 1.2826E-02 . ( 4.5000E-04 )

gradient rms: 2.6475E-03 . ( 3.0000E-04 )

step size: 0.30039 trust radius: 0.30000

displacement maximum: 1.4866E-01 . ( 1.8000E-03 )

displacement rms: 2.3601E-02 . ( 1.2000E-03 )

predicted energy change: -2.6208E-03 geom step: 3.0039E-

01 full step: 3.0039E-01

molecular structure not yet converged...

center of mass moved by:

x: -7.0070E-03 y: 3.1695E-03 z: -3.9849E-03

new geometry:

|      | angstroms     |               |               |
|------|---------------|---------------|---------------|
| atom | x             | y             | z             |
| N1   | -0.2431388835 | 0.4556736239  | 1.1723735471  |
| N2   | -1.0052221025 | -2.2638064326 | 1.1711775865  |
| C4   | -1.2354149005 | -0.0068382249 | 1.9686217617  |
| C5   | -0.0219368988 | -1.8840112724 | 0.4769055945  |
| C6   | -1.6547168498 | -1.3251930492 | 1.9985456785  |
| C7   | -1.7404984224 | 1.0066322943  | 2.7505185979  |
| C13  | 0.6709126692  | -2.8977538263 | -0.4172186213 |
| H4   | -3.0356419670 | -2.6439761971 | 2.9042709974  |
| C8   | -2.7930706857 | 0.6804961350  | 3.6197611198  |
| C11  | -0.9650101197 | 2.1686595222  | 2.4024960703  |
| H7   | -3.2425652691 | 1.4227454725  | 4.2536593268  |
| C9   | -3.2422765659 | -0.6233719281 | 3.6535786031  |
| H8   | -4.0458719809 | -0.8841748627 | 4.3157805202  |
| C10  | -2.6766502685 | -1.6346558742 | 2.8502873309  |
| C12  | -0.0710715297 | 1.7970748741  | 1.4546947917  |
| C2   | 0.9503376395  | 2.6145402001  | 0.7646068978  |
| H13  | 1.7459317870  | -2.8218826796 | -0.2973025660 |
| C14  | 0.3175412762  | -2.7210862854 | -1.8808548888 |
| H15  | 0.3721363370  | -3.8731171893 | -0.0645970713 |
| C15  | -0.4054882560 | -2.4055350093 | -4.5510673450 |
| C16  | 1.2049840844  | -2.1961843098 | -2.8003720449 |
| C17  | -0.9385119890 | -3.0863025612 | -2.3151953733 |
| C18  | -1.2985482642 | -2.9334100012 | -3.6363835117 |
| C19  | 0.8468309784  | -2.0394783637 | -4.1317416864 |
| H16  | 2.1814549757  | -1.8985296468 | -2.4799685659 |
| H17  | -1.6351318329 | -3.4951433926 | -1.6093012692 |
| H18  | -2.2805077802 | -3.2390864388 | -3.9568211189 |
| H19  | 1.5442219641  | -1.6284067831 | -4.8322649240 |
| H20  | -0.6918667664 | -2.2895583892 | -5.5817584789 |
| C1   | 0.5775477845  | -0.4792363854 | 0.4348181138  |
| H5   | 1.5772891761  | -0.5317014840 | 0.8498355316  |
| H6   | 0.6798600143  | -0.1840634649 | -0.5932120927 |
| C3   | 2.8710077594  | 4.1851297153  | -0.5136427992 |
| C26  | 1.9198910499  | 3.2990087678  | 1.5101069134  |
| C27  | 0.9496482049  | 2.7305127321  | -0.6306199707 |
| C28  | 1.9063251470  | 3.5077111519  | -1.2645504751 |
| C29  | 2.8739200353  | 4.0827381339  | 0.8755772877  |
| H1   | 1.9381200101  | 3.2016452634  | 2.5905377595  |
| H2   | 0.1888699186  | 2.2286821548  | -1.2204008413 |
| H3   | 1.8906486427  | 3.5909148714  | -2.3446780704 |
| H9   | 3.6213149051  | 4.5998757976  | 1.4699197044  |
| H10  | 3.6131544908  | 4.7887646367  | -1.0058448436 |
| H25  | -1.0749029726 | 3.1646160247  | 2.7777097600  |

nuclear repulsion energy..... 1972.328492632 hartrees

-----  
/ end of geometry optimization iteration 6 /  
-----

end of program geopt

start of program onee

smallest eigenvalue of S: 2.771E-04

number of canonical orbitals..... 461

end of program onee

start of program probe

end of program probe

start of program grid

number of gridpoints:

| atom     | N1  | N2  | C4  | C5  | C6  | C7  | C13 |
|----------|-----|-----|-----|-----|-----|-----|-----|
| H4       |     |     |     |     |     |     |     |
| grid # 1 | 95  | 102 | 85  | 88  | 89  | 88  | 84  |
| 73       |     |     |     |     |     |     |     |
| grid # 2 | 103 | 112 | 95  | 95  | 97  | 96  | 92  |
| 118      |     |     |     |     |     |     |     |
| grid # 3 | 212 | 227 | 194 | 188 | 190 | 198 | 164 |
| 224      |     |     |     |     |     |     |     |
| grid # 4 | 387 | 415 | 320 | 320 | 327 | 345 | 300 |
| 223      |     |     |     |     |     |     |     |

number of gridpoints:

| atom     | C8  | C11 | H7  | C9  | H8  | C10 | C12 |
|----------|-----|-----|-----|-----|-----|-----|-----|
| C2       |     |     |     |     |     |     |     |
| grid # 1 | 89  | 86  | 73  | 87  | 73  | 89  | 86  |
| 92       |     |     |     |     |     |     |     |
| grid # 2 | 97  | 94  | 118 | 97  | 118 | 97  | 94  |
| 100      |     |     |     |     |     |     |     |
| grid # 3 | 184 | 185 | 223 | 184 | 222 | 184 | 193 |
| 196      |     |     |     |     |     |     |     |
| grid # 4 | 330 | 330 | 226 | 329 | 223 | 326 | 316 |
| 343      |     |     |     |     |     |     |     |

number of gridpoints:

| atom     | H13 | C14 | H15 | C15 | C16 | C17 | C18 |
|----------|-----|-----|-----|-----|-----|-----|-----|
| C19      |     |     |     |     |     |     |     |
| grid # 1 | 69  | 93  | 69  | 89  | 88  | 87  | 89  |
| 89       |     |     |     |     |     |     |     |
| grid # 2 | 110 | 101 | 109 | 97  | 96  | 96  | 97  |
| 96       |     |     |     |     |     |     |     |

|          |     |     |     |     |     |     |     |
|----------|-----|-----|-----|-----|-----|-----|-----|
| grid # 3 | 211 | 191 | 213 | 182 | 183 | 182 | 184 |
| 182      |     |     |     |     |     |     |     |
| grid # 4 | 213 | 338 | 212 | 327 | 327 | 327 | 327 |
| 327      |     |     |     |     |     |     |     |

number of gridpoints:

|          |     |     |     |     |     |     |     |
|----------|-----|-----|-----|-----|-----|-----|-----|
| atom     | H16 | H17 | H18 | H19 | H20 | C1  | H5  |
| H6       |     |     |     |     |     |     |     |
| grid # 1 | 72  | 72  | 73  | 73  | 73  | 82  | 70  |
| 69       |     |     |     |     |     |     |     |
| grid # 2 | 113 | 115 | 118 | 118 | 118 | 87  | 108 |
| 103      |     |     |     |     |     |     |     |
| grid # 3 | 214 | 215 | 222 | 221 | 222 | 162 | 217 |
| 208      |     |     |     |     |     |     |     |
| grid # 4 | 214 | 215 | 224 | 223 | 224 | 290 | 215 |
| 205      |     |     |     |     |     |     |     |

number of gridpoints:

|          |     |     |     |     |     |     |     |
|----------|-----|-----|-----|-----|-----|-----|-----|
| atom     | C3  | C26 | C27 | C28 | C29 | H1  | H2  |
| H3       |     |     |     |     |     |     |     |
| grid # 1 | 89  | 89  | 88  | 89  | 89  | 73  | 71  |
| 73       |     |     |     |     |     |     |     |
| grid # 2 | 97  | 95  | 96  | 97  | 97  | 115 | 115 |
| 118      |     |     |     |     |     |     |     |
| grid # 3 | 186 | 184 | 185 | 185 | 185 | 218 | 218 |
| 222      |     |     |     |     |     |     |     |
| grid # 4 | 331 | 328 | 330 | 328 | 329 | 219 | 215 |
| 222      |     |     |     |     |     |     |     |

number of gridpoints:

|          |     |     |     |       |
|----------|-----|-----|-----|-------|
| atom     | H9  | H10 | H25 | total |
| grid # 1 | 73  | 73  | 73  | 3516  |
| grid # 2 | 118 | 118 | 115 | 4486  |
| grid # 3 | 223 | 224 | 221 | 8628  |
| grid # 4 | 224 | 224 | 224 | 12242 |

end of program grid

start of program rwr  
end of program rwr

start of program scf

|      |   |   |   |   |   |                  |               |                                       |
|------|---|---|---|---|---|------------------|---------------|---------------------------------------|
|      | i | u | d | i | g |                  |               |                                       |
|      | t | p | i | c | r |                  |               |                                       |
|      | e | d | i | u | i |                  |               |                                       |
|      | r | t | s | t | d | total energy     | energy change | RMS density change maximum DIIS error |
| etot | 1 | N | N | 2 | U | -990.31135910434 |               | 4.3E-04 4.0E-02                       |
| etot | 2 | Y | Y | 6 | M | -990.37781182905 | 6.6E-02       | 2.3E-04 1.6E-02                       |

|      |   |   |   |   |   |                  |         |         |         |
|------|---|---|---|---|---|------------------|---------|---------|---------|
| etot | 3 | N | Y | 2 | U | -990.38806340056 | 1.0E-02 | 6.8E-05 | 3.7E-03 |
| etot | 4 | Y | Y | 6 | M | -990.38873042054 | 6.7E-04 | 2.3E-05 | 1.0E-03 |
| etot | 5 | Y | Y | 6 | M | -990.38880803844 | 7.8E-05 | 9.7E-06 | 2.1E-04 |
| etot | 6 | N | Y | 2 | U | -990.38880825493 | 2.2E-07 | 3.3E-06 | 4.7E-05 |
| etot | 7 | Y | N | 6 | M | -990.38881016479 | 1.9E-06 | 0.0E+00 | 0.0E+00 |

Energy components, in hartrees:

|     |                               |                   |       |
|-----|-------------------------------|-------------------|-------|
| (A) | Nuclear repulsion.....        | 1972.32849263240  |       |
| (E) | Total one-electron terms..... | -5262.93232379671 |       |
| (I) | Total two-electron terms..... | 2300.21502099953  |       |
| (L) | Electronic energy.....        | -2962.71730279719 | (E+I) |
| (N) | Total energy.....             | -990.38881016479  | (A+L) |

SCFE: SCF energy: HF      -990.38881016479 hartrees      iterations:  
7

HOMO energy:      -0.26932  
LUMO energy:      0.09840

Orbital energies:

|           |           |           |           |           |           |
|-----------|-----------|-----------|-----------|-----------|-----------|
| -15.60367 | -15.56424 | -11.29601 | -11.28477 | -11.26958 | -11.25339 |
| -11.24904 | -11.24380 | -11.24330 | -11.24251 | -11.24217 | -11.24206 |
| -11.24138 | -11.24062 | -11.23899 | -11.23339 | -11.23226 | -11.23184 |
| -11.22993 | -11.22656 | -11.22352 | -11.21808 | -11.21636 | -11.21470 |
| -11.21091 | -1.32713  | -1.24880  | -1.16550  | -1.15964  | -1.13970  |
| -1.07482  | -1.06839  | -1.03820  | -1.02143  | -1.02048  | -1.01816  |
| -0.97093  | -0.95526  | -0.93500  | -0.86046  | -0.83462  | -0.83327  |
| -0.83082  | -0.80788  | -0.79619  | -0.76992  | -0.73305  | -0.71766  |
| -0.70058  | -0.69957  | -0.66673  | -0.65810  | -0.64423  | -0.63655  |
| -0.63289  | -0.62318  | -0.62001  | -0.61738  | -0.59598  | -0.59206  |
| -0.59102  | -0.58737  | -0.58058  | -0.55931  | -0.55282  | -0.54918  |
| -0.54135  | -0.51709  | -0.50650  | -0.50245  | -0.50066  | -0.49748  |
| -0.49337  | -0.49087  | -0.48836  | -0.48092  | -0.42887  | -0.40467  |
| -0.36567  | -0.34214  | -0.34177  | -0.33713  | -0.33161  | -0.28300  |
| -0.26932  | 0.09840   | 0.12812   | 0.13581   | 0.14035   | 0.14932   |
| 0.17951   | 0.20872   | 0.22741   | 0.23483   | 0.24185   |           |

end of program scf

start of program der1a  
end of program der1a

start of program rwr  
end of program rwr

start of program der1b



forces (hartrees/bohr) : total

| atom  | label | x             | y             | z             |
|-------|-------|---------------|---------------|---------------|
| 1     | N1    | 2.996888E-03  | -1.092300E-03 | -5.075419E-03 |
| 2     | N2    | 2.902098E-03  | 9.995089E-05  | -2.104699E-03 |
| 3     | C4    | 5.384872E-04  | -5.237104E-03 | -1.331028E-03 |
| 4     | C5    | -2.465605E-03 | -1.986060E-03 | 6.611523E-04  |
| 5     | C6    | 4.699496E-03  | -2.649344E-03 | -4.655830E-03 |
| 6     | C7    | -3.021900E-03 | 4.173873E-03  | 3.348288E-03  |
| 7     | C13   | 1.016495E-03  | 3.817286E-03  | 3.204766E-03  |
| 8     | H4    | -8.333256E-04 | -1.623874E-03 | 3.098643E-04  |
| 9     | C8    | -2.602591E-03 | -3.503070E-03 | 1.654229E-03  |
| 10    | C11   | -1.632059E-03 | 4.019113E-03  | 2.604804E-03  |
| 11    | H7    | -3.480026E-04 | 8.474685E-04  | 4.877169E-04  |
| 12    | C9    | 2.348395E-04  | 3.465178E-03  | 6.491069E-04  |
| 13    | H8    | -1.358836E-03 | -2.713855E-04 | 1.230370E-03  |
| 14    | C10   | -2.396643E-03 | 4.501606E-04  | 2.552408E-03  |
| 15    | C12   | 4.320330E-03  | -4.826731E-04 | -1.817665E-03 |
| 16    | C2    | 4.569580E-03  | 4.725283E-03  | -7.136536E-05 |
| 17    | H13   | 2.265698E-03  | 1.215287E-03  | 1.281866E-03  |
| 18    | C14   | 4.469088E-03  | 5.048013E-04  | 5.703955E-03  |
| 19    | H15   | -8.762473E-04 | -2.464998E-03 | -1.072243E-03 |
| 20    | C15   | -8.066367E-03 | -2.185489E-03 | -6.728433E-03 |
| 21    | C16   | 3.580633E-03  | 2.454246E-03  | -1.704632E-03 |
| 22    | C17   | -1.006307E-02 | -3.935131E-03 | -1.505949E-03 |
| 23    | C18   | -8.697968E-03 | -3.668085E-03 | -2.236322E-03 |
| 24    | C19   | 7.507799E-03  | 2.895454E-03  | 4.149845E-03  |
| 25    | H16   | 5.818461E-03  | 8.205617E-04  | 1.129787E-03  |
| 26    | H17   | -2.640653E-03 | -8.339735E-04 | 1.123124E-03  |
| 27    | H18   | 3.887211E-04  | 9.312185E-04  | 7.660585E-05  |
| 28    | H19   | 3.923565E-03  | 1.582982E-03  | -1.724279E-03 |
| 29    | H20   | 2.529764E-05  | 3.214141E-05  | 1.544815E-05  |
| 30    | C1    | -2.579334E-03 | -1.237971E-03 | 4.679537E-03  |
| 31    | H5    | 3.899026E-03  | 3.218813E-04  | 1.595166E-03  |
| 32    | H6    | 1.944755E-04  | 2.244129E-03  | -6.101903E-03 |
| 33    | C3    | -4.312188E-03 | -3.167459E-03 | 1.263702E-03  |
| 34    | C26   | -3.044044E-03 | -3.147202E-03 | -9.892063E-05 |
| 35    | C27   | -2.661653E-04 | -6.060645E-04 | 2.329980E-03  |
| 36    | C28   | 4.226828E-03  | 3.422783E-03  | 1.485505E-03  |
| 37    | C29   | 3.350305E-04  | -9.021500E-06 | -3.264345E-03 |
| 38    | H1    | -2.026984E-03 | -3.716618E-06 | -7.193914E-03 |
| 39    | H2    | 4.612104E-03  | 2.770042E-03  | 5.079830E-03  |
| 40    | H3    | 1.355729E-03  | 4.917203E-04  | 5.686416E-03  |
| 41    | H9    | -4.759377E-03 | -2.903258E-03 | -5.357919E-03 |
| 42    | H10   | -3.207912E-04 | -1.602736E-04 | -6.972213E-04 |
| 43    | H25   | -5.459823E-04 | 8.909836E-04  | 6.012465E-04  |
| total |       | 1.022540E-03  | 1.008090E-03  | 1.626298E-04  |

end of program der1b

start of program geopt 7

geometry optimization step 7

reading input hessian of dimension 129  
in five columns format

reading input hessian of dimension 129  
in five columns format

reading input hessian of dimension 129  
in five columns format

Level shifts adjusted to satisfy step-size constraints

Step size: 0.3001756

Cos(theta): 0.3481846

Final level shift: -5.8225096E-03

energy change: 7.6693E-04 . ( 5.0000E-05 )

gradient maximum: 1.7603E-02 . ( 4.5000E-04 )

gradient rms: 3.4045E-03 . ( 3.0000E-04 )

step size: 0.29981 trust radius: 0.30000

displacement maximum: 1.6540E-01 . ( 1.8000E-03 )

displacement rms: 2.3556E-02 . ( 1.2000E-03 )

predicted energy change: -2.5296E-03 geom step: 2.9981E-

01 full step: 2.9981E-01

molecular structure not yet converged...

center of mass moved by:

x: -3.4490E-03

y: -8.1566E-03

z: 4.8314E-03

new geometry:

|      | angstroms     |               |               |
|------|---------------|---------------|---------------|
| atom | x             | y             | z             |
| N1   | -0.2623089590 | 0.4311251804  | 1.1716991713  |
| N2   | -1.0180143788 | -2.2950059180 | 1.2042298173  |
| C4   | -1.2360309063 | -0.0332939736 | 1.9960257998  |
| C5   | -0.0491760452 | -1.9161106272 | 0.4898652496  |
| C6   | -1.6476617970 | -1.3546394568 | 2.0462415395  |
| C7   | -1.7230911186 | 0.9831467707  | 2.7922374034  |
| C13  | 0.6280306553  | -2.9273737531 | -0.4121209218 |
| H4   | -2.9937724088 | -2.6736769475 | 3.0115780294  |
| C8   | -2.7457092522 | 0.6539618582  | 3.6975262155  |
| C11  | -0.9667588878 | 2.1493399444  | 2.4114356404  |
| H7   | -3.1781071145 | 1.3980009698  | 4.3414501000  |
| C9   | -3.1860027373 | -0.6506742671 | 3.7535912964  |
| H8   | -3.9650269465 | -0.9130115590 | 4.4450494557  |
| C10  | -2.6416558807 | -1.6625876251 | 2.9369875099  |
| C12  | -0.0857743078 | 1.7755955971  | 1.4454283139  |
| C2   | 0.9164503009  | 2.6009974180  | 0.7343857052  |
| H13  | 1.7123800183  | -2.8842131896 | -0.2571412082 |

|     |               |               |               |
|-----|---------------|---------------|---------------|
| C14 | 0.3088978040  | -2.7056385440 | -1.8863538501 |
| H15 | 0.2866736531  | -3.9117867885 | -0.0961463804 |
| C15 | -0.2973622557 | -2.3040914497 | -4.5907098684 |
| C16 | 1.3065628895  | -2.3700351452 | -2.7900211464 |
| C17 | -0.9983945440 | -2.8282694144 | -2.3525013671 |
| C18 | -1.2991393561 | -2.6286610044 | -3.6904363154 |
| C19 | 1.0036021505  | -2.1732391689 | -4.1341691423 |
| H16 | 2.3304900741  | -2.2499797277 | -2.4490130079 |
| H17 | -1.7797248649 | -3.0692236040 | -1.6584418267 |
| H18 | -2.3091793966 | -2.7128159017 | -4.0314102359 |
| H19 | 1.7931017057  | -1.9116780263 | -4.8188293061 |
| H20 | -0.5306398208 | -2.1492911389 | -5.6298028759 |
| C1  | 0.5501654299  | -0.5106191206 | 0.4295419250  |
| H5  | 1.5613035628  | -0.5554938071 | 0.8239873713  |
| H6  | 0.6303048976  | -0.2234538860 | -0.6093977434 |
| C3  | 2.8015088368  | 4.1881714110  | -0.5810245152 |
| C26 | 1.8234927411  | 3.3659516372  | 1.4559907329  |
| C27 | 0.9590649824  | 2.6466221398  | -0.6560625455 |
| C28 | 1.8988761714  | 3.4310895081  | -1.3074873104 |
| C29 | 2.7564483373  | 4.1586935309  | 0.8023034085  |
| H1  | 1.8043237458  | 3.3261495512  | 2.5316351329  |
| H2  | 0.2432097047  | 2.0877393438  | -1.2297362427 |
| H3  | 1.9178440967  | 3.4562601140  | -2.3820556926 |
| H9  | 3.4514125005  | 4.7412314670  | 1.3756845720  |
| H10 | 3.5280434798  | 4.7976541261  | -1.0885472588 |
| H25 | -1.0762728724 | 3.1476511252  | 2.7825837903  |

nuclear repulsion energy..... 1971.760476131 hartrees

/ end of geometry optimization iteration 7 /

end of program geopt

start of program onee

smallest eigenvalue of S: 2.799E-04

number of canonical orbitals..... 461

end of program onee

start of program probe

end of program probe

start of program grid

number of gridpoints:

|    | atom     | N1 | N2  | C4 | C5 | C6 | C7 | C13 |
|----|----------|----|-----|----|----|----|----|-----|
| H4 |          |    |     |    |    |    |    |     |
|    | grid # 1 | 96 | 102 | 87 | 88 | 89 | 88 | 84  |

73

|          |     |     |     |     |     |     |     |
|----------|-----|-----|-----|-----|-----|-----|-----|
| grid # 2 | 104 | 112 | 95  | 95  | 97  | 98  | 92  |
| 118      |     |     |     |     |     |     |     |
| grid # 3 | 214 | 227 | 195 | 187 | 190 | 199 | 164 |
| 224      |     |     |     |     |     |     |     |
| grid # 4 | 388 | 414 | 320 | 320 | 327 | 348 | 301 |
| 224      |     |     |     |     |     |     |     |

|                       |     |     |     |     |     |     |     |
|-----------------------|-----|-----|-----|-----|-----|-----|-----|
| number of gridpoints: |     |     |     |     |     |     |     |
| atom                  | C8  | C11 | H7  | C9  | H8  | C10 | C12 |
| C2                    |     |     |     |     |     |     |     |
| grid # 1              | 89  | 86  | 73  | 87  | 73  | 89  | 84  |
| 92                    |     |     |     |     |     |     |     |
| grid # 2              | 97  | 94  | 118 | 97  | 118 | 97  | 95  |
| 100                   |     |     |     |     |     |     |     |
| grid # 3              | 184 | 185 | 223 | 184 | 222 | 184 | 195 |
| 195                   |     |     |     |     |     |     |     |
| grid # 4              | 330 | 331 | 226 | 329 | 223 | 326 | 321 |
| 343                   |     |     |     |     |     |     |     |

|                       |     |     |     |     |     |     |     |
|-----------------------|-----|-----|-----|-----|-----|-----|-----|
| number of gridpoints: |     |     |     |     |     |     |     |
| atom                  | H13 | C14 | H15 | C15 | C16 | C17 | C18 |
| C19                   |     |     |     |     |     |     |     |
| grid # 1              | 69  | 91  | 69  | 89  | 88  | 87  | 89  |
| 88                    |     |     |     |     |     |     |     |
| grid # 2              | 110 | 100 | 110 | 97  | 96  | 96  | 97  |
| 96                    |     |     |     |     |     |     |     |
| grid # 3              | 211 | 194 | 215 | 183 | 183 | 183 | 184 |
| 183                   |     |     |     |     |     |     |     |
| grid # 4              | 216 | 340 | 217 | 327 | 329 | 329 | 328 |
| 327                   |     |     |     |     |     |     |     |

|                       |     |     |     |     |     |     |     |
|-----------------------|-----|-----|-----|-----|-----|-----|-----|
| number of gridpoints: |     |     |     |     |     |     |     |
| atom                  | H16 | H17 | H18 | H19 | H20 | C1  | H5  |
| H6                    |     |     |     |     |     |     |     |
| grid # 1              | 72  | 73  | 73  | 73  | 73  | 82  | 70  |
| 69                    |     |     |     |     |     |     |     |
| grid # 2              | 114 | 114 | 118 | 118 | 118 | 88  | 108 |
| 105                   |     |     |     |     |     |     |     |
| grid # 3              | 214 | 216 | 222 | 222 | 223 | 164 | 217 |
| 207                   |     |     |     |     |     |     |     |
| grid # 4              | 214 | 215 | 224 | 222 | 224 | 290 | 217 |
| 204                   |     |     |     |     |     |     |     |

|                       |     |     |     |     |     |     |     |
|-----------------------|-----|-----|-----|-----|-----|-----|-----|
| number of gridpoints: |     |     |     |     |     |     |     |
| atom                  | C3  | C26 | C27 | C28 | C29 | H1  | H2  |
| H3                    |     |     |     |     |     |     |     |
| grid # 1              | 89  | 88  | 88  | 89  | 89  | 72  | 71  |
| 73                    |     |     |     |     |     |     |     |
| grid # 2              | 97  | 95  | 96  | 97  | 97  | 115 | 114 |
| 118                   |     |     |     |     |     |     |     |
| grid # 3              | 184 | 182 | 184 | 184 | 184 | 217 | 214 |
| 222                   |     |     |     |     |     |     |     |

```

grid # 4      328      327      329      327      328      217      212
224

```

number of gridpoints:

| atom     | H9  | H10 | H25 | total |
|----------|-----|-----|-----|-------|
| grid # 1 | 73  | 73  | 72  | 3512  |
| grid # 2 | 118 | 118 | 115 | 4492  |
| grid # 3 | 222 | 223 | 220 | 8629  |
| grid # 4 | 224 | 224 | 224 | 12258 |

end of program grid

start of program rwr

end of program rwr

start of program scf

|      | i | u | d | i | g |                  |         | RMS     | maximum |
|------|---|---|---|---|---|------------------|---------|---------|---------|
|      | t | p | i | c | r |                  |         | density | DIIS    |
|      | e | d | i | u | i |                  | energy  | change  | error   |
|      | r | t | s | t | d | total energy     | change  |         |         |
| etot | 1 | N | N | 2 | U | -990.30270768203 |         | 4.6E-04 | 3.1E-02 |
| etot | 2 | Y | Y | 6 | M | -990.37847298562 | 7.6E-02 | 2.4E-04 | 1.2E-02 |
| etot | 3 | N | Y | 2 | U | -990.38974615112 | 1.1E-02 | 7.3E-05 | 3.0E-03 |
| etot | 4 | Y | Y | 6 | M | -990.39043838018 | 6.9E-04 | 2.1E-05 | 7.2E-04 |
| etot | 5 | Y | Y | 6 | M | -990.39051259464 | 7.4E-05 | 9.9E-06 | 1.8E-04 |
| etot | 6 | N | Y | 2 | U | -990.39052152447 | 8.9E-06 | 3.4E-06 | 8.4E-05 |
| etot | 7 | Y | N | 6 | M | -990.39052390496 | 2.4E-06 | 0.0E+00 | 0.0E+00 |

Energy components, in hartrees:

|     |                               |                   |       |
|-----|-------------------------------|-------------------|-------|
| (A) | Nuclear repulsion.....        | 1971.76047613143  |       |
| (E) | Total one-electron terms..... | -5261.77830707936 |       |
| (I) | Total two-electron terms..... | 2299.62730704297  |       |
| (L) | Electronic energy.....        | -2962.15100003639 | (E+I) |
| (N) | Total energy.....             | -990.39052390496  | (A+L) |

```

SCFE: SCF energy: HF      -990.39052390496 hartrees   iterations:
7

```

HOMO energy: -0.26911  
LUMO energy: 0.09715

Orbital energies:

|           |           |           |           |           |           |
|-----------|-----------|-----------|-----------|-----------|-----------|
| -15.60451 | -15.56524 | -11.29616 | -11.28590 | -11.27118 | -11.25063 |
| -11.25053 | -11.24661 | -11.24537 | -11.24207 | -11.23978 | -11.23885 |
| -11.23840 | -11.23770 | -11.23689 | -11.23687 | -11.23575 | -11.23433 |
| -11.23300 | -11.23088 | -11.22421 | -11.21944 | -11.21799 | -11.21554 |

|           |          |          |          |          |          |
|-----------|----------|----------|----------|----------|----------|
| -11.21243 | -1.32546 | -1.24901 | -1.16385 | -1.16049 | -1.13916 |
| -1.07447  | -1.06674 | -1.04044 | -1.02137 | -1.01939 | -1.01613 |
| -0.97215  | -0.95419 | -0.93387 | -0.86020 | -0.83767 | -0.83371 |
| -0.82913  | -0.80726 | -0.79554 | -0.77026 | -0.73264 | -0.71762 |
| -0.70168  | -0.69844 | -0.66645 | -0.65787 | -0.64274 | -0.63728 |
| -0.63416  | -0.62358 | -0.62128 | -0.61619 | -0.59608 | -0.59210 |
| -0.59055  | -0.58653 | -0.57915 | -0.55835 | -0.55307 | -0.54811 |
| -0.54314  | -0.51759 | -0.50730 | -0.50317 | -0.50057 | -0.49639 |
| -0.49350  | -0.49125 | -0.48704 | -0.48151 | -0.42958 | -0.40467 |
| -0.36720  | -0.34424 | -0.34058 | -0.33732 | -0.32999 | -0.28301 |
| -0.26911  | 0.09715  | 0.12930  | 0.13663  | 0.13689  | 0.14839  |
| 0.17926   | 0.20825  | 0.22812  | 0.23474  | 0.24177  |          |

end of program scf

start of program der1a  
end of program der1a

start of program rwr  
end of program rwr

start of program der1b

forces (hartrees/bohr) : total

| atom | label | x             | y             | z             |
|------|-------|---------------|---------------|---------------|
| ---- | ----- | -----         | -----         | -----         |
| 1    | N1    | 1.716334E-03  | -1.943601E-03 | -3.246573E-03 |
| 2    | N2    | 1.508741E-03  | 7.372569E-04  | -8.449564E-04 |
| 3    | C4    | 1.732777E-03  | -2.550928E-03 | -1.144846E-04 |
| 4    | C5    | -2.258395E-03 | -1.157807E-03 | 1.364650E-03  |
| 5    | C6    | 3.010108E-03  | -1.559524E-03 | -2.676497E-03 |
| 6    | C7    | -2.119800E-03 | 2.378055E-03  | 8.088183E-05  |
| 7    | C13   | 7.949520E-04  | -3.166784E-03 | 1.193967E-03  |
| 8    | H4    | -5.137608E-04 | -1.262150E-03 | 5.166284E-05  |
| 9    | C8    | -1.260196E-03 | -1.009633E-03 | 7.377051E-04  |
| 10   | C11   | 1.581835E-03  | 1.944482E-03  | 1.100216E-03  |
| 11   | H7    | -2.844006E-04 | 7.476233E-04  | 4.649418E-04  |
| 12   | C9    | 3.021764E-04  | 2.034644E-03  | 3.016599E-04  |
| 13   | H8    | -9.191824E-04 | -1.596108E-04 | 8.422822E-04  |
| 14   | C10   | -2.885543E-04 | -3.647628E-05 | 3.084839E-04  |
| 15   | C12   | -1.002256E-04 | 1.528865E-04  | 8.546479E-05  |
| 16   | C2    | -1.824596E-03 | -8.798194E-04 | 7.008701E-05  |
| 17   | H13   | -5.907107E-03 | 4.474195E-05  | -1.786917E-03 |
| 18   | C14   | 2.117880E-03  | 2.467810E-04  | 1.794266E-03  |
| 19   | H15   | 1.613655E-03  | 3.598184E-03  | -1.510856E-03 |
| 20   | C15   | 3.515496E-03  | 5.380807E-04  | 1.351633E-03  |
| 21   | C16   | 3.599045E-03  | 1.791191E-03  | -2.863792E-03 |
| 22   | C17   | 6.384644E-04  | 6.449569E-04  | -1.226921E-03 |

|       |       |               |               |               |
|-------|-------|---------------|---------------|---------------|
| 23    | C18   | 3.274344E-03  | 3.831445E-04  | 3.904487E-03  |
| 24    | C19   | 3.397778E-03  | 6.246062E-04  | 2.548436E-04  |
| 25    | H16   | -6.033188E-03 | -1.648501E-03 | -2.241051E-03 |
| 26    | H17   | -2.244134E-03 | -1.119039E-03 | 1.633890E-03  |
| 27    | H18   | -5.095790E-03 | -1.462176E-03 | -5.193377E-04 |
| 28    | H19   | -7.132674E-04 | -3.366359E-04 | 6.699522E-05  |
| 29    | H20   | 5.473843E-04  | 5.484700E-05  | 2.894166E-04  |
| 30    | C1    | -2.121480E-03 | 9.323276E-04  | 7.055723E-04  |
| 31    | H5    | 1.935195E-03  | 3.195981E-04  | 1.225099E-03  |
| 32    | H6    | 1.335999E-04  | 6.505389E-04  | -1.350591E-03 |
| 33    | C3    | 2.237467E-04  | 7.332118E-04  | 8.228264E-04  |
| 34    | C26   | 2.934216E-03  | 2.259092E-03  | 1.769155E-03  |
| 35    | C27   | 1.749225E-03  | 1.423862E-03  | -2.428323E-03 |
| 36    | C28   | -3.039822E-03 | -2.449444E-03 | -8.296198E-04 |
| 37    | C29   | -1.534705E-03 | -1.836397E-03 | 1.746854E-03  |
| 38    | H1    | 1.639685E-04  | 5.612689E-04  | -9.703912E-04 |
| 39    | H2    | -6.178164E-04 | -7.198783E-04 | -5.945158E-04 |
| 40    | H3    | -2.726356E-04 | -1.448398E-04 | -7.139410E-04 |
| 41    | H9    | 1.428431E-03  | 1.266800E-03  | 1.288079E-03  |
| 42    | H10   | 1.793635E-04  | 8.168534E-05  | 1.338084E-04  |
| 43    | H25   | -2.945761E-04 | 3.841792E-04  | 3.416161E-04  |
| ----- |       |               |               |               |
|       | total | 6.550833E-04  | 1.090803E-03  | 1.177413E-05  |

end of program derlb

start of program geopt 8

geometry optimization step 8

reading input hessian of dimension 129

in five columns format

reading input hessian of dimension 129

in five columns format

reading input hessian of dimension 129

in five columns format

Level shifts adjusted to satisfy step-size constraints

Step size: 0.3001625

Cos(theta): 0.3290489

Final level shift: -3.2712361E-03

energy change: -1.7137E-03 . ( 5.0000E-05 )

gradient maximum: 6.5993E-03 . ( 4.5000E-04 )

gradient rms: 1.5880E-03 . ( 3.0000E-04 )

step size: 0.30014 trust radius: 0.30000

displacement maximum: 1.3289E-01 . ( 1.8000E-03 )

displacement rms: 2.3581E-02 . ( 1.2000E-03 )

predicted energy change: -1.1454E-03 geom step: 3.0014E-

01 full step: 3.0014E-01

molecular structure not yet converged...

center of mass moved by:

x: 1.4339E-03 y: 3.9888E-03 z: 1.3736E-03

new geometry:

|      | angstroms     |               |               |
|------|---------------|---------------|---------------|
| atom | x             | y             | z             |
| N1   | -0.2427301136 | 0.4133581705  | 1.1722777583  |
| N2   | -1.0454939928 | -2.3112638158 | 1.1699656111  |
| C4   | -1.2161957562 | -0.0597207232 | 2.0064760689  |
| C5   | -0.0696132821 | -1.9370852449 | 0.4798595573  |
| C6   | -1.6544570973 | -1.3757803348 | 2.0263648965  |
| C7   | -1.6847856453 | 0.9623542639  | 2.8316875226  |
| C13  | 0.5944122868  | -2.9384071474 | -0.4387964649 |
| H4   | -3.0378534973 | -2.6801972707 | 2.9787940568  |
| C8   | -2.7195283903 | 0.6400467042  | 3.7315827985  |
| C11  | -0.8978500352 | 2.1256728813  | 2.4741738095  |
| H7   | -3.1321827458 | 1.3838331907  | 4.3903874062  |
| C9   | -3.1856697575 | -0.6615094865 | 3.7551713096  |
| H8   | -3.9748299789 | -0.9205218030 | 4.4383849881  |
| C10  | -2.6599327111 | -1.6753768988 | 2.9171144248  |
| C12  | -0.0449844390 | 1.7563976980  | 1.4791878795  |
| C2   | 0.9261767262  | 2.6151140566  | 0.7518235711  |
| H13  | 1.6652174605  | -2.8719758706 | -0.3024610873 |
| C14  | 0.2876181649  | -2.7034242241 | -1.9136085293 |
| H15  | 0.2724733448  | -3.9275784756 | -0.1477724137 |
| C15  | -0.2818249606 | -2.3156026969 | -4.6110105067 |
| C16  | 1.3116920078  | -2.5254385140 | -2.8427232568 |
| C17  | -1.0214564856 | -2.6804795857 | -2.3448902825 |
| C18  | -1.3074367587 | -2.4976491583 | -3.6888738098 |
| C19  | 1.0337227845  | -2.3208152467 | -4.1837294462 |
| H16  | 2.3428974456  | -2.5809231360 | -2.5252940373 |
| H17  | -1.8180053491 | -2.8390751217 | -1.6358051292 |
| H18  | -2.3411635228 | -2.5448754781 | -4.0117834742 |
| H19  | 1.8504547007  | -2.2045671815 | -4.8863974827 |
| H20  | -0.5093223464 | -2.1903514419 | -5.6550411487 |
| C1   | 0.5725384418  | -0.5359270224 | 0.4467237410  |
| H5   | 1.5825600909  | -0.6025572202 | 0.8639586010  |
| H6   | 0.6849443477  | -0.2439441492 | -0.5977493705 |
| C3   | 2.7427643680  | 4.2718109037  | -0.5786007634 |
| C26  | 1.7583262170  | 3.4655134300  | 1.4748050376  |
| C27  | 1.0258000879  | 2.6093370968  | -0.6475070512 |
| C28  | 1.9286490508  | 3.4252015088  | -1.3062477428 |
| C29  | 2.6507103176  | 4.2926508665  | 0.8143808905  |
| H1   | 1.7064457766  | 3.4685024593  | 2.5540630146  |
| H2   | 0.3832676468  | 1.9769465517  | -1.2258047756 |
| H3   | 1.9981625157  | 3.3991783059  | -2.3867378260 |
| H9   | 3.2735304395  | 4.9523138350  | 1.3873712355  |
| H10  | 3.4343293803  | 4.9068564617  | -1.0932588436 |
| H25  | -0.9916197529 | 3.1137132967  | 2.8763314713  |



nuclear repulsion energy..... 1966.909747028 hartrees

-----  
/ end of geometry optimization iteration 8 /  
-----

end of program geopt

start of program onee

smallest eigenvalue of S: 2.927E-04

number of canonical orbitals..... 461

end of program onee

start of program probe

end of program probe

start of program grid

number of gridpoints:

| atom     | N1  | N2  | C4  | C5  | C6  | C7  | C13 |
|----------|-----|-----|-----|-----|-----|-----|-----|
| H4       |     |     |     |     |     |     |     |
| grid # 1 | 96  | 102 | 86  | 88  | 88  | 90  | 84  |
| 73       |     |     |     |     |     |     |     |
| grid # 2 | 104 | 112 | 94  | 95  | 101 | 98  | 92  |
| 118      |     |     |     |     |     |     |     |
| grid # 3 | 215 | 228 | 195 | 186 | 189 | 198 | 163 |
| 223      |     |     |     |     |     |     |     |
| grid # 4 | 388 | 413 | 323 | 321 | 327 | 351 | 300 |
| 224      |     |     |     |     |     |     |     |

number of gridpoints:

| atom     | C8  | C11 | H7  | C9  | H8  | C10 | C12 |
|----------|-----|-----|-----|-----|-----|-----|-----|
| C2       |     |     |     |     |     |     |     |
| grid # 1 | 89  | 87  | 73  | 87  | 73  | 89  | 86  |
| 91       |     |     |     |     |     |     |     |
| grid # 2 | 97  | 94  | 118 | 97  | 118 | 97  | 95  |
| 100      |     |     |     |     |     |     |     |
| grid # 3 | 184 | 185 | 223 | 185 | 222 | 184 | 194 |
| 195      |     |     |     |     |     |     |     |
| grid # 4 | 329 | 331 | 226 | 331 | 224 | 328 | 318 |
| 343      |     |     |     |     |     |     |     |

number of gridpoints:

| atom     | H13 | C14 | H15 | C15 | C16 | C17 | C18 |
|----------|-----|-----|-----|-----|-----|-----|-----|
| C19      |     |     |     |     |     |     |     |
| grid # 1 | 69  | 90  | 69  | 89  | 87  | 88  | 88  |
| 88       |     |     |     |     |     |     |     |
| grid # 2 | 107 | 98  | 111 | 97  | 96  | 96  | 97  |
| 97       |     |     |     |     |     |     |     |

|          |     |     |     |     |     |     |     |
|----------|-----|-----|-----|-----|-----|-----|-----|
| grid # 3 | 209 | 195 | 218 | 183 | 184 | 184 | 184 |
|----------|-----|-----|-----|-----|-----|-----|-----|

182

|          |     |     |     |     |     |     |     |
|----------|-----|-----|-----|-----|-----|-----|-----|
| grid # 4 | 207 | 339 | 213 | 329 | 329 | 330 | 331 |
|----------|-----|-----|-----|-----|-----|-----|-----|

330

number of gridpoints:

|      |     |     |     |     |     |    |    |
|------|-----|-----|-----|-----|-----|----|----|
| atom | H16 | H17 | H18 | H19 | H20 | C1 | H5 |
|------|-----|-----|-----|-----|-----|----|----|

H6

|          |    |    |    |    |    |    |    |
|----------|----|----|----|----|----|----|----|
| grid # 1 | 73 | 73 | 73 | 73 | 73 | 82 | 70 |
|----------|----|----|----|----|----|----|----|

69

|          |     |     |     |     |     |    |     |
|----------|-----|-----|-----|-----|-----|----|-----|
| grid # 2 | 114 | 115 | 118 | 118 | 118 | 90 | 110 |
|----------|-----|-----|-----|-----|-----|----|-----|

105

|          |     |     |     |     |     |     |     |
|----------|-----|-----|-----|-----|-----|-----|-----|
| grid # 3 | 214 | 215 | 223 | 222 | 224 | 166 | 217 |
|----------|-----|-----|-----|-----|-----|-----|-----|

205

|          |     |     |     |     |     |     |     |
|----------|-----|-----|-----|-----|-----|-----|-----|
| grid # 4 | 213 | 215 | 223 | 222 | 224 | 293 | 220 |
|----------|-----|-----|-----|-----|-----|-----|-----|

207

number of gridpoints:

|      |    |     |     |     |     |    |    |
|------|----|-----|-----|-----|-----|----|----|
| atom | C3 | C26 | C27 | C28 | C29 | H1 | H2 |
|------|----|-----|-----|-----|-----|----|----|

H3

|          |    |    |    |    |    |    |    |
|----------|----|----|----|----|----|----|----|
| grid # 1 | 89 | 89 | 88 | 89 | 89 | 72 | 70 |
|----------|----|----|----|----|----|----|----|

73

|          |    |    |    |    |    |     |     |
|----------|----|----|----|----|----|-----|-----|
| grid # 2 | 97 | 96 | 96 | 97 | 97 | 115 | 113 |
|----------|----|----|----|----|----|-----|-----|

118

|          |     |     |     |     |     |     |     |
|----------|-----|-----|-----|-----|-----|-----|-----|
| grid # 3 | 186 | 182 | 185 | 184 | 186 | 217 | 213 |
|----------|-----|-----|-----|-----|-----|-----|-----|

222

|          |     |     |     |     |     |     |     |
|----------|-----|-----|-----|-----|-----|-----|-----|
| grid # 4 | 330 | 327 | 328 | 327 | 330 | 217 | 210 |
|----------|-----|-----|-----|-----|-----|-----|-----|

224

number of gridpoints:

|          |     |     |     |       |
|----------|-----|-----|-----|-------|
| atom     | H9  | H10 | H25 | total |
| grid # 1 | 73  | 73  | 72  | 3513  |
| grid # 2 | 118 | 118 | 115 | 4497  |
| grid # 3 | 223 | 223 | 219 | 8634  |
| grid # 4 | 223 | 223 | 222 | 12263 |

end of program grid

start of program rwr  
end of program rwr

start of program scf

|   |   |   |   |   |              |               |                    |                    |
|---|---|---|---|---|--------------|---------------|--------------------|--------------------|
| i | u | d | i | g |              |               |                    |                    |
| t | p | i | c | r |              |               |                    |                    |
| e | d | i | u | i |              |               |                    |                    |
| r | t | s | t | d | total energy | energy change | RMS density change | maximum DIIS error |

|      |   |   |   |   |   |                  |         |         |         |
|------|---|---|---|---|---|------------------|---------|---------|---------|
| etot | 1 | N | N | 2 | U | -990.33991144147 |         | 3.6E-04 | 2.8E-02 |
| etot | 2 | Y | Y | 6 | M | -990.38172607361 | 4.2E-02 | 1.8E-04 | 1.1E-02 |

|      |   |   |   |   |   |                  |         |         |         |
|------|---|---|---|---|---|------------------|---------|---------|---------|
| etot | 3 | N | Y | 2 | U | -990.38813338998 | 6.4E-03 | 5.5E-05 | 2.7E-03 |
| etot | 4 | Y | Y | 6 | M | -990.38854871108 | 4.2E-04 | 2.2E-05 | 8.5E-04 |
| etot | 5 | Y | Y | 6 | M | -990.38862044730 | 7.2E-05 | 8.4E-06 | 1.6E-04 |
| etot | 6 | N | Y | 2 | U | -990.38863299439 | 1.3E-05 | 3.2E-06 | 5.7E-05 |
| etot | 7 | Y | N | 6 | M | -990.38863307052 | 7.6E-08 | 0.0E+00 | 0.0E+00 |

Energy components, in hartrees:

|     |                               |                   |       |
|-----|-------------------------------|-------------------|-------|
| (A) | Nuclear repulsion.....        | 1966.90974702809  |       |
| (E) | Total one-electron terms..... | -5252.08828716800 |       |
| (I) | Total two-electron terms..... | 2294.78990706939  |       |
| (L) | Electronic energy.....        | -2957.29838009861 | (E+I) |
| (N) | Total energy.....             | -990.38863307052  | (A+L) |

SCFE: SCF energy: HF      -990.38863307052 hartrees      iterations:  
7

HOMO energy:      -0.26918  
LUMO energy:      0.09483

Orbital energies:

|           |           |           |           |           |           |
|-----------|-----------|-----------|-----------|-----------|-----------|
| -15.60546 | -15.56553 | -11.29617 | -11.28888 | -11.27440 | -11.25323 |
| -11.25291 | -11.24932 | -11.24466 | -11.23989 | -11.23899 | -11.23849 |
| -11.23820 | -11.23781 | -11.23695 | -11.23662 | -11.23581 | -11.23470 |
| -11.23345 | -11.22918 | -11.22676 | -11.22253 | -11.22247 | -11.21821 |
| -11.21580 | -1.32205  | -1.25283  | -1.16216  | -1.16049  | -1.13639  |
| -1.07414  | -1.06661  | -1.03656  | -1.02137  | -1.01847  | -1.01697  |
| -0.96944  | -0.95479  | -0.93227  | -0.85933  | -0.83776  | -0.83195  |
| -0.82823  | -0.80624  | -0.79536  | -0.76922  | -0.73264  | -0.71663  |
| -0.70030  | -0.69768  | -0.66473  | -0.65767  | -0.64239  | -0.63624  |
| -0.63253  | -0.62481  | -0.62019  | -0.61335  | -0.59730  | -0.59249  |
| -0.58848  | -0.58801  | -0.57615  | -0.55734  | -0.55154  | -0.54848  |
| -0.54556  | -0.51729  | -0.50702  | -0.50198  | -0.49950  | -0.49588  |
| -0.49449  | -0.49099  | -0.48779  | -0.47966  | -0.42997  | -0.40493  |
| -0.36948  | -0.34394  | -0.33991  | -0.33752  | -0.32983  | -0.28137  |
| -0.26918  | 0.09483   | 0.12818   | 0.13771   | 0.13869   | 0.14741   |
| 0.17628   | 0.20896   | 0.22759   | 0.23471   | 0.23973   |           |

end of program scf

start of program der1a  
end of program der1a

start of program rwr  
end of program rwr

start of program der1b

forces (hartrees/bohr) : total

| atom  | label | x             | y             | z             |
|-------|-------|---------------|---------------|---------------|
| 1     | N1    | -3.608445E-03 | 2.818146E-03  | 4.387853E-03  |
| 2     | N2    | -8.257060E-03 | -1.291490E-03 | 6.873558E-03  |
| 3     | C4    | 2.927401E-04  | 9.089283E-03  | 2.291217E-03  |
| 4     | C5    | 1.159396E-02  | 4.274925E-03  | -1.002984E-02 |
| 5     | C6    | -2.111425E-03 | 3.526585E-03  | 5.173623E-03  |
| 6     | C7    | 3.146159E-03  | -4.915515E-03 | -4.361290E-03 |
| 7     | C13   | 1.197140E-03  | 3.152175E-03  | -4.853313E-03 |
| 8     | H4    | 6.158857E-05  | 2.208153E-04  | -3.754693E-04 |
| 9     | C8    | 3.232912E-03  | -4.388872E-03 | -3.687738E-03 |
| 10    | C11   | -2.930359E-03 | -7.516295E-03 | -1.095850E-03 |
| 11    | H7    | -5.246514E-04 | -5.339326E-04 | 3.142423E-05  |
| 12    | C9    | 2.211024E-03  | 7.245822E-04  | -2.076187E-03 |
| 13    | H8    | -9.756688E-05 | -4.122068E-04 | 2.025975E-04  |
| 14    | C10   | 2.685113E-04  | 4.837745E-03  | 1.404553E-03  |
| 15    | C12   | 1.505465E-03  | 8.606128E-04  | -3.784882E-03 |
| 16    | C2    | 4.596320E-04  | -4.228012E-03 | -4.301454E-03 |
| 17    | H13   | 4.376286E-03  | -2.059499E-03 | 1.720359E-03  |
| 18    | C14   | 1.184396E-02  | 2.108409E-03  | 5.874802E-03  |
| 19    | H15   | -6.450204E-04 | -1.250607E-03 | 1.770200E-03  |
| 20    | C15   | -5.854112E-03 | 1.356985E-04  | -5.815791E-04 |
| 21    | C16   | 3.009072E-03  | -1.664308E-03 | 4.118831E-03  |
| 22    | C17   | -8.790402E-03 | -1.738000E-03 | -6.298458E-03 |
| 23    | C18   | -4.719041E-03 | -2.976537E-03 | -2.898018E-03 |
| 24    | C19   | 3.419037E-03  | -2.514676E-03 | -7.224967E-04 |
| 25    | H16   | -2.647010E-03 | 1.940020E-03  | 9.827487E-04  |
| 26    | H17   | 7.504203E-04  | 1.171925E-03  | -1.479661E-03 |
| 27    | H18   | 6.000360E-03  | 3.165718E-03  | -3.106612E-04 |
| 28    | H19   | -5.276927E-03 | 3.874991E-04  | 2.823860E-03  |
| 29    | H20   | -6.458594E-04 | 6.314977E-04  | 1.160412E-04  |
| 30    | C1    | 4.753900E-04  | -1.944511E-03 | -4.062617E-03 |
| 31    | H5    | -3.832564E-03 | -2.580860E-04 | -2.786851E-04 |
| 32    | H6    | -7.710760E-04 | -1.574150E-03 | 5.124757E-03  |
| 33    | C3    | -8.483867E-04 | 5.126358E-04  | 1.028467E-02  |
| 34    | C26   | -3.375860E-04 | 6.706250E-04  | 2.040083E-04  |
| 35    | C27   | -2.580503E-03 | -2.382582E-03 | 7.317669E-03  |
| 36    | C28   | -4.311198E-04 | -1.818641E-03 | -1.976063E-03 |
| 37    | C29   | 3.356317E-04  | 9.286614E-04  | -7.586848E-03 |
| 38    | H1    | 4.426202E-04  | 2.672569E-04  | -4.159578E-03 |
| 39    | H2    | -3.082192E-03 | -2.219428E-03 | -4.993021E-04 |
| 40    | H3    | -1.537561E-03 | 6.603144E-05  | 5.377819E-03  |
| 41    | H9    | 2.343965E-03  | 1.305606E-03  | 1.437853E-04  |
| 42    | H10   | 3.434594E-03  | 3.036993E-03  | 3.538105E-04  |
| 43    | H25   | 3.444813E-05  | 5.165315E-04  | -1.111761E-03 |
| total |       | 9.060454E-04  | 6.626275E-04  | 4.644130E-05  |

end of program der1b

start of program geopt 9

geometry optimization step 9

reading input hessian of dimension 129

in five columns format

reading input hessian of dimension 129

in five columns format

reading input hessian of dimension 129

in five columns format

\*\* restarting optimization from step 8 \*\*

Level shifts adjusted to satisfy step-size constraints

Step size: 0.3007076

Cos(theta): 0.3121536

Final level shift: -6.2152375E-03

energy change: 1.8908E-03 . ( 5.0000E-05 )

gradient maximum: 6.5993E-03 . ( 4.5000E-04 )

gradient rms: 1.5880E-03 . ( 3.0000E-04 )

step size: 0.29990 trust radius: 0.30000

displacement maximum: 1.3848E-01 . ( 1.8000E-03 )

displacement rms: 2.3562E-02 . ( 1.2000E-03 )

predicted energy change: -1.2255E-03 geom step: 2.9990E-

01 full step: 2.9990E-01

molecular structure not yet converged...

center of mass moved by:

x: -7.4940E-16

y: 2.6368E-16

z: -8.3267E-16

new geometry:

|      | angstroms     |               |               |
|------|---------------|---------------|---------------|
| atom | x             | y             | z             |
| N1   | -0.2112213224 | 0.4759821970  | 1.1509370987  |
| N2   | -0.9304654889 | -2.2596315619 | 1.1557263606  |
| C4   | -1.2007566870 | -0.0050996186 | 1.9468199390  |
| C5   | 0.0308354325  | -1.8599684763 | 0.4447847412  |
| C6   | -1.5893298383 | -1.3330206181 | 1.9833821552  |
| C7   | -1.7559182331 | 1.0130893177  | 2.7060893243  |
| C13  | 0.7195427103  | -2.8544750054 | -0.4654951884 |
| H4   | -2.9732939203 | -2.6636627946 | 2.8871238361  |
| C8   | -2.8165407677 | 0.6740276669  | 3.5624798977  |
| C11  | -0.9876468060 | 2.1851605542  | 2.3748675911  |
| H7   | -3.2934365683 | 1.4196419607  | 4.1781118649  |
| C9   | -3.2309842879 | -0.6335021660 | 3.6104914752  |
| H8   | -4.0426550097 | -0.9068067006 | 4.2655024799  |
| C10  | -2.6247327918 | -1.6447328748 | 2.8300957907  |
| C12  | -0.0663221250 | 1.8221726220  | 1.4414763503  |
| C2   | 0.9615610706  | 2.6573510475  | 0.7929901780  |
| H13  | 1.7804240263  | -2.7291419038 | -0.3977998181 |

|     |               |               |               |
|-----|---------------|---------------|---------------|
| C14 | 0.2904550036  | -2.7194671495 | -1.9078212042 |
| H15 | 0.4874628272  | -3.8353817165 | -0.1033936907 |
| C15 | -0.5195728220 | -2.5100998311 | -4.5600986738 |
| C16 | 1.1731723675  | -2.2603581915 | -2.8876463572 |
| C17 | -1.0114333568 | -3.0801698853 | -2.2799362236 |
| C18 | -1.4107209530 | -2.9767515754 | -3.5926183840 |
| C19 | 0.7731816258  | -2.1547371391 | -4.2060163333 |
| H16 | 2.1848694620  | -1.9871622113 | -2.6169976829 |
| H17 | -1.6947814125 | -3.4329355076 | -1.5285602629 |
| H18 | -2.3991425622 | -3.2559857461 | -3.8614828367 |
| H19 | 1.4638084288  | -1.7938641349 | -4.9522904025 |
| H20 | -0.8298119621 | -2.4271286947 | -5.5831759553 |
| C1  | 0.6128319456  | -0.4474688200 | 0.4042533197  |
| H5  | 1.6225608382  | -0.4852424998 | 0.8284411699  |
| H6  | 0.7094088190  | -0.1466392262 | -0.6361783628 |
| C3  | 2.9218539781  | 4.2333037928  | -0.3978184205 |
| C26 | 1.8547642164  | 3.3951618772  | 1.5732849714  |
| C27 | 1.0554555784  | 2.7250390584  | -0.5942672449 |
| C28 | 2.0276025330  | 3.5107060596  | -1.1848132236 |
| C29 | 2.8296541634  | 4.1778589369  | 0.9812369472  |
| H1  | 1.7838933136  | 3.3413965331  | 2.6388352230  |
| H2  | 0.3516514934  | 2.1776688845  | -1.2016643395 |
| H3  | 2.0892544843  | 3.5634944072  | -2.2542289962 |
| H9  | 3.5239664473  | 4.7363520807  | 1.5935527668  |
| H10 | 3.6885398335  | 4.8392355334  | -0.8576710935 |
| H25 | -1.1255993547 | 3.1803096411  | 2.7475409393  |

nuclear repulsion energy..... 1969.045876041 hartrees

/ end of geometry optimization iteration 9 /

end of program geopt

start of program onee

smallest eigenvalue of S: 2.808E-04

number of canonical orbitals..... 461

end of program onee

start of program probe

end of program probe

start of program grid

number of gridpoints:

|    | atom     | N1 | N2  | C4 | C5 | C6 | C7 | C13 |
|----|----------|----|-----|----|----|----|----|-----|
| H4 |          |    |     |    |    |    |    |     |
|    | grid # 1 | 95 | 102 | 84 | 87 | 89 | 90 | 84  |

73

|          |     |     |     |     |     |     |     |
|----------|-----|-----|-----|-----|-----|-----|-----|
| grid # 2 | 104 | 112 | 95  | 95  | 101 | 98  | 92  |
| 118      |     |     |     |     |     |     |     |
| grid # 3 | 212 | 227 | 193 | 187 | 192 | 198 | 163 |
| 224      |     |     |     |     |     |     |     |
| grid # 4 | 386 | 414 | 324 | 320 | 324 | 350 | 294 |
| 224      |     |     |     |     |     |     |     |

|                       |     |     |     |     |     |     |     |
|-----------------------|-----|-----|-----|-----|-----|-----|-----|
| number of gridpoints: |     |     |     |     |     |     |     |
| atom                  | C8  | C11 | H7  | C9  | H8  | C10 | C12 |
| C2                    |     |     |     |     |     |     |     |
| grid # 1              | 89  | 86  | 73  | 87  | 73  | 89  | 86  |
| 90                    |     |     |     |     |     |     |     |
| grid # 2              | 97  | 94  | 118 | 97  | 118 | 97  | 94  |
| 100                   |     |     |     |     |     |     |     |
| grid # 3              | 184 | 184 | 223 | 184 | 222 | 184 | 195 |
| 194                   |     |     |     |     |     |     |     |
| grid # 4              | 328 | 332 | 226 | 328 | 223 | 330 | 317 |
| 341                   |     |     |     |     |     |     |     |

|                       |     |     |     |     |     |     |     |
|-----------------------|-----|-----|-----|-----|-----|-----|-----|
| number of gridpoints: |     |     |     |     |     |     |     |
| atom                  | H13 | C14 | H15 | C15 | C16 | C17 | C18 |
| C19                   |     |     |     |     |     |     |     |
| grid # 1              | 69  | 91  | 69  | 89  | 88  | 87  | 89  |
| 89                    |     |     |     |     |     |     |     |
| grid # 2              | 108 | 100 | 109 | 97  | 96  | 96  | 97  |
| 97                    |     |     |     |     |     |     |     |
| grid # 3              | 211 | 196 | 214 | 186 | 184 | 182 | 183 |
| 184                   |     |     |     |     |     |     |     |
| grid # 4              | 210 | 341 | 212 | 329 | 328 | 326 | 329 |
| 327                   |     |     |     |     |     |     |     |

|                       |     |     |     |     |     |     |     |
|-----------------------|-----|-----|-----|-----|-----|-----|-----|
| number of gridpoints: |     |     |     |     |     |     |     |
| atom                  | H16 | H17 | H18 | H19 | H20 | C1  | H5  |
| H6                    |     |     |     |     |     |     |     |
| grid # 1              | 72  | 72  | 73  | 73  | 73  | 82  | 70  |
| 69                    |     |     |     |     |     |     |     |
| grid # 2              | 114 | 115 | 118 | 118 | 118 | 90  | 108 |
| 104                   |     |     |     |     |     |     |     |
| grid # 3              | 213 | 215 | 223 | 222 | 223 | 164 | 217 |
| 206                   |     |     |     |     |     |     |     |
| grid # 4              | 214 | 215 | 223 | 223 | 224 | 293 | 219 |
| 208                   |     |     |     |     |     |     |     |

|                       |     |     |     |     |     |     |     |
|-----------------------|-----|-----|-----|-----|-----|-----|-----|
| number of gridpoints: |     |     |     |     |     |     |     |
| atom                  | C3  | C26 | C27 | C28 | C29 | H1  | H2  |
| H3                    |     |     |     |     |     |     |     |
| grid # 1              | 89  | 87  | 87  | 89  | 89  | 72  | 71  |
| 73                    |     |     |     |     |     |     |     |
| grid # 2              | 97  | 95  | 96  | 97  | 97  | 115 | 114 |
| 118                   |     |     |     |     |     |     |     |
| grid # 3              | 185 | 181 | 182 | 184 | 185 | 217 | 213 |
| 223                   |     |     |     |     |     |     |     |

grid # 4        330        328        330        327        328        216        212  
224

number of gridpoints:

| atom     | H9  | H10 | H25 | total |
|----------|-----|-----|-----|-------|
| grid # 1 | 73  | 73  | 72  | 3507  |
| grid # 2 | 118 | 118 | 115 | 4495  |
| grid # 3 | 223 | 223 | 220 | 8625  |
| grid # 4 | 224 | 224 | 224 | 12249 |

end of program grid

start of program rwr

end of program rwr

start of program scf

|      | i | u | d | i | g |                  |          | RMS     | maximum |
|------|---|---|---|---|---|------------------|----------|---------|---------|
|      | t | p | i | c | r |                  |          | density | DIIS    |
|      | e | d | i | u | i |                  | energy   | change  | error   |
|      | r | t | s | t | d | total energy     | change   |         |         |
| etot | 1 | N | N | 2 | U | -990.19143961399 |          | 6.9E-04 | 5.1E-02 |
| etot | 2 | Y | Y | 6 | M | -990.36304368943 | 1.7E-01  | 3.6E-04 | 2.1E-02 |
| etot | 3 | N | Y | 2 | U | -990.38756589331 | 2.5E-02  | 1.1E-04 | 4.9E-03 |
| etot | 4 | Y | Y | 6 | M | -990.38902919237 | 1.5E-03  | 3.0E-05 | 1.2E-03 |
| etot | 5 | Y | Y | 6 | M | -990.38919073874 | 1.6E-04  | 1.6E-05 | 3.2E-04 |
| etot | 6 | N | Y | 2 | U | -990.38919602691 | 5.3E-06  | 5.3E-06 | 8.1E-05 |
| etot | 7 | Y | Y | 6 | M | -990.38919546120 | -5.7E-07 | 2.6E-06 | 3.1E-05 |
| etot | 8 | Y | N | 6 | M | -990.38919647219 | 1.0E-06  | 0.0E+00 | 0.0E+00 |

Energy components, in hartrees:

|     |                               |                   |       |
|-----|-------------------------------|-------------------|-------|
| (A) | Nuclear repulsion.....        | 1969.04587604074  |       |
| (E) | Total one-electron terms..... | -5256.35681247047 |       |
| (I) | Total two-electron terms..... | 2296.92173995754  |       |
| (L) | Electronic energy.....        | -2959.43507251293 | (E+I) |
| (N) | Total energy.....             | -990.38919647219  | (A+L) |

SCFE: SCF energy: HF        -990.38919647219 hartrees        iterations:  
8

HOMO energy:        -0.26840

LUMO energy:        0.09701

Orbital energies:

|           |           |           |           |           |           |
|-----------|-----------|-----------|-----------|-----------|-----------|
| -15.60534 | -15.56470 | -11.29636 | -11.28875 | -11.27084 | -11.25072 |
| -11.25052 | -11.24617 | -11.24576 | -11.24057 | -11.23986 | -11.23892 |
| -11.23842 | -11.23745 | -11.23597 | -11.23589 | -11.23480 | -11.23326 |



|           |           |           |           |           |           |
|-----------|-----------|-----------|-----------|-----------|-----------|
| -11.23202 | -11.22987 | -11.22361 | -11.22021 | -11.21809 | -11.21556 |
| -11.21238 | -1.32578  | -1.25026  | -1.16340  | -1.15935  | -1.13851  |
| -1.07486  | -1.06779  | -1.03915  | -1.02304  | -1.01954  | -1.01789  |
| -0.96974  | -0.95431  | -0.93406  | -0.86044  | -0.83631  | -0.83390  |
| -0.82845  | -0.80772  | -0.79588  | -0.77036  | -0.73270  | -0.71782  |
| -0.70108  | -0.69798  | -0.66655  | -0.65810  | -0.64342  | -0.63833  |
| -0.63434  | -0.62250  | -0.62043  | -0.61751  | -0.59675  | -0.59349  |
| -0.59179  | -0.58934  | -0.57738  | -0.55766  | -0.55188  | -0.54826  |
| -0.54421  | -0.51763  | -0.50773  | -0.50313  | -0.50021  | -0.49540  |
| -0.49235  | -0.49068  | -0.48759  | -0.48192  | -0.42965  | -0.40506  |
| -0.36691  | -0.34326  | -0.34192  | -0.33901  | -0.32575  | -0.28176  |
| -0.26840  | 0.09701   | 0.12789   | 0.13689   | 0.13892   | 0.14831   |
| 0.17873   | 0.20902   | 0.22650   | 0.23488   | 0.24146   |           |

end of program scf

start of program derla  
end of program derla

start of program rwr  
end of program rwr

start of program der1b

forces (hartrees/bohr) : total

| atom | label | x             | y             | z             |
|------|-------|---------------|---------------|---------------|
| 1    | N1    | -1.847904E-03 | 1.350870E-03  | 1.372186E-03  |
| 2    | N2    | 8.004859E-04  | -1.184322E-03 | -1.290199E-03 |
| 3    | C4    | -2.990647E-03 | 1.894084E-03  | -1.153339E-03 |
| 4    | C5    | -1.267694E-03 | -1.405869E-03 | 2.168808E-03  |
| 5    | C6    | -3.781687E-03 | 1.063700E-03  | 1.466086E-03  |
| 6    | C7    | 3.701565E-03  | -2.358705E-03 | 9.208506E-04  |
| 7    | C13   | -6.358814E-03 | 5.686112E-03  | 1.117194E-03  |
| 8    | H4    | 7.566979E-04  | 2.267632E-03  | 4.118942E-04  |
| 9    | C8    | 3.487603E-04  | 4.660037E-03  | 1.792745E-03  |
| 10   | C11   | -4.761810E-04 | -4.721753E-05 | -2.385896E-03 |
| 11   | H7    | 6.406881E-04  | -9.788330E-04 | -1.030604E-03 |
| 12   | C9    | -1.838024E-03 | -6.112861E-03 | 1.573878E-04  |
| 13   | H8    | 1.321968E-03  | 2.841587E-04  | -1.158728E-03 |
| 14   | C10   | -9.988378E-04 | -2.699473E-03 | -2.337905E-04 |
| 15   | C12   | -3.644818E-04 | 5.292972E-04  | 1.985804E-03  |
| 16   | C2    | 4.214487E-03  | 2.571180E-03  | 2.054306E-03  |
| 17   | H13   | 1.220174E-02  | 2.129938E-03  | 9.413491E-04  |
| 18   | C14   | -1.971814E-03 | -2.257252E-04 | -1.000693E-02 |
| 19   | H15   | -2.739856E-03 | -7.545521E-03 | 3.261445E-03  |
| 20   | C15   | -3.750255E-04 | -1.032296E-03 | 2.979952E-03  |
| 21   | C16   | 3.971553E-04  | -1.694801E-03 | 1.180222E-02  |

|       |       |               |               |               |
|-------|-------|---------------|---------------|---------------|
| 22    | C17   | 1.081296E-02  | 3.319375E-03  | 5.677630E-03  |
| 23    | C18   | 1.275942E-02  | 5.331517E-03  | -6.004976E-03 |
| 24    | C19   | -6.135291E-03 | -1.513302E-04 | -5.275360E-03 |
| 25    | H16   | -3.575445E-03 | -1.293270E-03 | 1.989000E-04  |
| 26    | H17   | -2.282103E-04 | -2.076355E-04 | 5.184705E-04  |
| 27    | H18   | -1.003847E-02 | -2.388316E-03 | -4.271375E-03 |
| 28    | H19   | -1.686569E-03 | -1.077089E-03 | 1.228071E-03  |
| 29    | H20   | -1.715323E-03 | -1.767050E-04 | -2.514137E-03 |
| 30    | C1    | 6.153916E-03  | 1.649965E-03  | 1.097077E-03  |
| 31    | H5    | -3.027084E-03 | -3.480673E-04 | -3.342055E-03 |
| 32    | H6    | -1.486703E-04 | -3.556652E-04 | 2.982007E-03  |
| 33    | C3    | 1.936388E-06  | 2.107970E-04  | -5.988076E-03 |
| 34    | C26   | -4.239919E-03 | -2.750183E-03 | -4.310837E-03 |
| 35    | C27   | -6.213987E-04 | -7.833312E-05 | 4.417728E-04  |
| 36    | C28   | 4.704144E-03  | 3.029595E-03  | 2.767092E-03  |
| 37    | C29   | 2.147902E-03  | 1.746275E-03  | 9.650488E-04  |
| 38    | H1    | -4.030953E-04 | -8.930180E-04 | 4.530742E-03  |
| 39    | H2    | 1.885956E-03  | 1.855455E-03  | 5.925202E-04  |
| 40    | H3    | 5.723930E-04  | 3.930392E-04  | -2.575663E-03 |
| 41    | H9    | -2.986811E-03 | -2.049155E-03 | -1.829814E-03 |
| 42    | H10   | -2.808888E-03 | -1.906220E-03 | -3.199569E-05 |
| 43    | H25   | 3.854478E-04  | -1.625851E-04 | -2.576043E-04 |
| ----- |       |               |               |               |
|       | total | 1.181474E-03  | 8.498306E-04  | -2.298122E-04 |

end of program der1b

start of program geopt 10

geometry optimization step 10

[ turning on trust-radius adjustment ]

reading input hessian of dimension 129

in five columns format

reading input hessian of dimension 129

in five columns format

reading input hessian of dimension 129

in five columns format

\*\* restarting optimization from step 8 \*\*

energy change: 1.3274E-03 . ( 5.0000E-05 )

gradient maximum: 6.5993E-03 . ( 4.5000E-04 )

gradient rms: 1.5880E-03 . ( 3.0000E-04 )

step size: 0.12023 trust radius: 0.15000

displacement maximum: 4.6109E-02 . ( 1.8000E-03 )

displacement rms: 9.4462E-03 . ( 1.2000E-03 )

predicted energy change: -6.6309E-04 geom step: 1.2023E-

01 full step: 1.2023E-01

molecular structure not yet converged...

center of mass moved by:

x: 5.8287E-16 y: 2.6368E-16 z: 5.5511E-17

new geometry:

|      | angstroms     |               |               |
|------|---------------|---------------|---------------|
| atom | x             | y             | z             |
| N1   | -0.2503467923 | 0.4313387940  | 1.1728975667  |
| N2   | -0.9922353568 | -2.3008642645 | 1.2068479080  |
| C4   | -1.2177846926 | -0.0412413961 | 2.0027340636  |
| C5   | -0.0328950456 | -1.9152046665 | 0.4874677885  |
| C6   | -1.6207580303 | -1.3658403732 | 2.0516318574  |
| C7   | -1.7256576704 | 0.9802469690  | 2.7898913510  |
| C13  | 0.6345154182  | -2.9213500262 | -0.4256979858 |
| H4   | -2.9784638181 | -2.6865579845 | 3.0093481473  |
| C8   | -2.7573880472 | 0.6486468955  | 3.6876420923  |
| C11  | -0.9686088796 | 2.1508712541  | 2.4150585939  |
| H7   | -3.2011472190 | 1.3958055134  | 4.3235415609  |
| C9   | -3.1880965526 | -0.6579308626 | 3.7452763889  |
| H8   | -3.9761108933 | -0.9234283427 | 4.4292771187  |
| C10  | -2.6259600579 | -1.6723713900 | 2.9368264804  |
| C12  | -0.0840044705 | 1.7791562074  | 1.4502481760  |
| C2   | 0.9094340782  | 2.6151448582  | 0.7396605597  |
| H13  | 1.7117184108  | -2.8786891597 | -0.2812033952 |
| C14  | 0.3106147337  | -2.6930411706 | -1.8952436050 |
| H15  | 0.2973278585  | -3.9045733242 | -0.1220199652 |
| C15  | -0.3176308144 | -2.3047012879 | -4.5894802502 |
| C16  | 1.3058774411  | -2.4094783712 | -2.8200443949 |
| C17  | -1.0094991762 | -2.7875081323 | -2.3386183614 |
| C18  | -1.3208168237 | -2.5954695037 | -3.6744560256 |
| C19  | 0.9966496806  | -2.2130779832 | -4.1595138305 |
| H16  | 2.3268560103  | -2.3606962160 | -2.4970780760 |
| H17  | -1.7899818400 | -3.0122134213 | -1.6310120439 |
| H18  | -2.3448732588 | -2.6750402869 | -4.0018765889 |
| H19  | 1.7816422461  | -2.0017592358 | -4.8628995476 |
| H20  | -0.5601115265 | -2.1562329340 | -5.6282763720 |
| C1   | 0.5677714222  | -0.5074561645 | 0.4336493303  |
| H5   | 1.5802783124  | -0.5505269015 | 0.8402390685  |
| H6   | 0.6558736629  | -0.2175416456 | -0.6088435807 |
| C3   | 2.8070428603  | 4.1983759363  | -0.5604794150 |
| C26  | 1.7923657031  | 3.4110711813  | 1.4677798769  |
| C27  | 0.9824585662  | 2.6308465889  | -0.6519969273 |
| C28  | 1.9254954757  | 3.4145041743  | -1.2967484498 |
| C29  | 2.7309857208  | 4.2007778211  | 0.8223821304  |
| H1   | 1.7459445767  | 3.3977291757  | 2.5379712574  |
| H2   | 0.2862125744  | 2.0466037166  | -1.2287363733 |
| H3   | 1.9713578203  | 3.4151297035  | -2.3708451625 |
| H9   | 3.4096713505  | 4.8073562604  | 1.3990774035  |
| H10  | 3.5437855062  | 4.8042079101  | -1.0617698905 |
| H25  | -1.0891245347 | 3.1494999185  | 2.7854402047  |

nuclear repulsion energy..... 1970.392406452 hartrees

-----  
/ end of geometry optimization iteration 10 /

-----  
end of program geopt

start of program onee  
smallest eigenvalue of S: 2.841E-04  
number of canonical orbitals..... 461  
end of program onee

start of program probe  
end of program probe

start of program grid

number of gridpoints:

| atom     | N1  | N2  | C4  | C5  | C6  | C7  | C13 |
|----------|-----|-----|-----|-----|-----|-----|-----|
| H4       |     |     |     |     |     |     |     |
| grid # 1 | 96  | 102 | 87  | 88  | 90  | 89  | 84  |
| 73       |     |     |     |     |     |     |     |
| grid # 2 | 103 | 112 | 95  | 95  | 99  | 97  | 92  |
| 118      |     |     |     |     |     |     |     |
| grid # 3 | 213 | 227 | 195 | 187 | 191 | 200 | 163 |
| 224      |     |     |     |     |     |     |     |
| grid # 4 | 389 | 414 | 323 | 320 | 321 | 351 | 300 |
| 224      |     |     |     |     |     |     |     |

number of gridpoints:

| atom     | C8  | C11 | H7  | C9  | H8  | C10 | C12 |
|----------|-----|-----|-----|-----|-----|-----|-----|
| C2       |     |     |     |     |     |     |     |
| grid # 1 | 89  | 86  | 73  | 87  | 73  | 89  | 86  |
| 92       |     |     |     |     |     |     |     |
| grid # 2 | 97  | 94  | 118 | 97  | 118 | 97  | 94  |
| 100      |     |     |     |     |     |     |     |
| grid # 3 | 184 | 185 | 223 | 184 | 222 | 184 | 195 |
| 195      |     |     |     |     |     |     |     |
| grid # 4 | 328 | 331 | 226 | 331 | 223 | 329 | 318 |
| 342      |     |     |     |     |     |     |     |

number of gridpoints:

| atom     | H13 | C14 | H15 | C15 | C16 | C17 | C18 |
|----------|-----|-----|-----|-----|-----|-----|-----|
| C19      |     |     |     |     |     |     |     |
| grid # 1 | 69  | 91  | 69  | 89  | 88  | 88  | 89  |
| 89       |     |     |     |     |     |     |     |
| grid # 2 | 109 | 100 | 110 | 97  | 96  | 96  | 97  |
| 96       |     |     |     |     |     |     |     |
| grid # 3 | 210 | 197 | 216 | 183 | 184 | 183 | 184 |
| 183      |     |     |     |     |     |     |     |
| grid # 4 | 213 | 342 | 213 | 327 | 329 | 327 | 327 |
| 329      |     |     |     |     |     |     |     |

```

number of gridpoints:
  atom      H16      H17      H18      H19      H20      C1      H5
H6
  grid # 1      73      73      73      73      73      82      70
69
  grid # 2     113     115     118     118     118      89     110
104
  grid # 3     214     216     223     222     224     165     217
207
  grid # 4     214     214     224     223     224     293     219
206

```

```

number of gridpoints:
  atom      C3      C26      C27      C28      C29      H1      H2
H3
  grid # 1      89      88      88      89      89      72      71
73
  grid # 2      97      95      96      97      97     115     114
118
  grid # 3     184     182     184     184     185     217     212
223
  grid # 4     329     328     329     327     329     216     212
224

```

```

number of gridpoints:
  atom      H9      H10      H25      total
grid # 1      73      73      72     3519
grid # 2     118     118     115     4492
grid # 3     222     223     220     8636
grid # 4     224     224     224    12260

```

end of program grid

```

start of program rwr
end of program rwr

```

start of program scf

|      | i | u | d | i | g |                  |         | RMS     | maximum |
|------|---|---|---|---|---|------------------|---------|---------|---------|
|      | t | p | i | c | r |                  |         | density | DIIS    |
|      | e | d | i | u | i |                  | energy  | change  | error   |
|      | r | t | s | t | d | total energy     | change  |         |         |
| etot | 1 | N | N | 2 | U | -990.29802142608 |         | 4.7E-04 | 3.6E-02 |
| etot | 2 | Y | Y | 6 | M | -990.37914076540 | 8.1E-02 | 2.4E-04 | 1.5E-02 |
| etot | 3 | N | Y | 2 | U | -990.39011714517 | 1.1E-02 | 7.3E-05 | 3.6E-03 |
| etot | 4 | Y | Y | 6 | M | -990.39075170470 | 6.3E-04 | 1.8E-05 | 8.3E-04 |
| etot | 5 | Y | Y | 6 | M | -990.39080716088 | 5.5E-05 | 9.2E-06 | 2.4E-04 |
| etot | 6 | N | Y | 2 | U | -990.39081625073 | 9.1E-06 | 3.2E-06 | 6.3E-05 |

etot 7 Y N 6 M -990.39082059817 4.3E-06 0.0E+00 0.0E+00

Energy components, in hartrees:

|     |                               |                   |       |
|-----|-------------------------------|-------------------|-------|
| (A) | Nuclear repulsion.....        | 1970.39240645220  |       |
| (E) | Total one-electron terms..... | -5259.04946585476 |       |
| (I) | Total two-electron terms..... | 2298.26623880439  |       |
| (L) | Electronic energy.....        | -2960.78322705037 | (E+I) |
| (N) | Total energy.....             | -990.39082059817  | (A+L) |

SCFE: SCF energy: HF -990.39082059817 hartrees iterations:  
7

HOMO energy: -0.26884  
LUMO energy: 0.09625

Orbital energies:

|           |           |           |           |           |           |
|-----------|-----------|-----------|-----------|-----------|-----------|
| -15.60520 | -15.56542 | -11.29634 | -11.28757 | -11.27197 | -11.25137 |
| -11.25137 | -11.24663 | -11.24624 | -11.24028 | -11.24014 | -11.23939 |
| -11.23864 | -11.23804 | -11.23717 | -11.23626 | -11.23525 | -11.23435 |
| -11.23339 | -11.23131 | -11.22496 | -11.22092 | -11.21941 | -11.21652 |
| -11.21351 | -1.32467  | -1.25038  | -1.16266  | -1.16009  | -1.13785  |
| -1.07415  | -1.06682  | -1.03876  | -1.02160  | -1.01902  | -1.01676  |
| -0.97049  | -0.95423  | -0.93360  | -0.85986  | -0.83666  | -0.83382  |
| -0.82912  | -0.80693  | -0.79529  | -0.76986  | -0.73238  | -0.71725  |
| -0.70084  | -0.69840  | -0.66614  | -0.65779  | -0.64278  | -0.63724  |
| -0.63391  | -0.62371  | -0.62052  | -0.61551  | -0.59631  | -0.59205  |
| -0.59042  | -0.58760  | -0.57799  | -0.55757  | -0.55200  | -0.54823  |
| -0.54488  | -0.51728  | -0.50751  | -0.50254  | -0.49998  | -0.49565  |
| -0.49359  | -0.49112  | -0.48733  | -0.48118  | -0.42972  | -0.40500  |
| -0.36774  | -0.34301  | -0.34117  | -0.33775  | -0.32916  | -0.28213  |
| -0.26884  | 0.09625   | 0.12876   | 0.13660   | 0.13709   | 0.14832   |
| 0.17835   | 0.20865   | 0.22790   | 0.23513   | 0.24117   |           |

end of program scf

start of program der1a  
end of program der1a

start of program rwr  
end of program rwr

start of program der1b

forces (hartrees/bohr) : total

| atom | label | x     | y     | z     |
|------|-------|-------|-------|-------|
| ---- | ----- | ----- | ----- | ----- |

|       |     |               |               |               |
|-------|-----|---------------|---------------|---------------|
| 1     | N1  | 3.176707E-04  | -7.109467E-05 | 1.405262E-05  |
| 2     | N2  | -1.075429E-03 | -2.083377E-04 | 7.417913E-04  |
| 3     | C4  | -9.732657E-04 | 1.912845E-03  | 4.219490E-04  |
| 4     | C5  | 9.390608E-04  | -3.118005E-04 | -6.400202E-04 |
| 5     | C6  | -1.872859E-03 | 6.288692E-04  | 1.567042E-03  |
| 6     | C7  | 8.574249E-04  | -1.220477E-03 | -4.534514E-04 |
| 7     | C13 | 4.990676E-05  | 2.619141E-04  | -1.067732E-03 |
| 8     | H4  | 2.212391E-04  | 7.436348E-04  | 4.175358E-05  |
| 9     | C8  | 9.716663E-04  | 1.126067E-03  | -2.443932E-04 |
| 10    | C11 | -3.058807E-04 | -1.016420E-03 | -2.792513E-05 |
| 11    | H7  | 2.030616E-04  | -3.912862E-04 | -4.531555E-04 |
| 12    | C9  | 3.885238E-04  | -1.817448E-03 | -8.541092E-04 |
| 13    | H8  | 5.647280E-04  | 1.033803E-04  | -4.236539E-04 |
| 14    | C10 | 1.787747E-04  | 1.629413E-04  | -1.130833E-04 |
| 15    | C12 | -2.993285E-04 | 9.293299E-04  | -8.305882E-04 |
| 16    | C2  | 2.106919E-03  | 3.714443E-04  | 1.529857E-03  |
| 17    | H13 | -8.453989E-06 | -1.369249E-05 | -3.866099E-04 |
| 18    | C14 | -2.620975E-03 | -8.478820E-04 | -2.750261E-04 |
| 19    | H15 | 1.703486E-04  | 2.476269E-04  | 5.668823E-04  |
| 20    | C15 | 1.348587E-03  | 3.170487E-04  | -3.143626E-04 |
| 21    | C16 | -3.287963E-03 | -8.576557E-04 | -7.679380E-04 |
| 22    | C17 | 9.274778E-04  | 5.528706E-04  | 2.811386E-05  |
| 23    | C18 | -2.653106E-04 | -1.756854E-04 | 1.189448E-03  |
| 24    | C19 | -2.378424E-03 | -1.170097E-03 | 5.057107E-05  |
| 25    | H16 | 3.742774E-03  | 1.309982E-03  | 7.701638E-04  |
| 26    | H17 | 6.077310E-04  | 2.216130E-04  | -3.997413E-04 |
| 27    | H18 | 1.487305E-03  | 2.292942E-04  | 4.715166E-04  |
| 28    | H19 | 5.016746E-04  | 5.351337E-04  | -4.906618E-04 |
| 29    | H20 | 3.420834E-04  | -6.617536E-05 | 7.707523E-04  |
| 30    | C1  | 1.310155E-03  | 1.015916E-03  | -6.323303E-04 |
| 31    | H5  | -1.427620E-03 | -7.688246E-05 | -7.480952E-04 |
| 32    | H6  | -2.814998E-05 | -3.196540E-04 | 2.202996E-03  |
| 33    | C3  | -1.512850E-03 | -7.323179E-04 | -2.557105E-03 |
| 34    | C26 | -1.040007E-03 | -4.215451E-04 | -2.994571E-03 |
| 35    | C27 | 2.310941E-04  | 6.193161E-04  | -3.498692E-04 |
| 36    | C28 | 1.620128E-03  | 8.085342E-04  | 2.072791E-03  |
| 37    | C29 | 2.143792E-04  | -9.341659E-05 | 4.237368E-04  |
| 38    | H1  | -3.535759E-05 | -1.816722E-04 | 3.011021E-03  |
| 39    | H2  | 6.170067E-04  | 4.683717E-04  | 1.307347E-04  |
| 40    | H3  | -3.642736E-05 | 2.655682E-04  | -5.930004E-04 |
| 41    | H9  | -9.794912E-04 | -8.053914E-04 | -4.013531E-04 |
| 42    | H10 | -1.162548E-03 | -8.092648E-04 | 1.701950E-04  |
| 43    | H25 | 1.251612E-04  | -4.338929E-04 | -3.335687E-04 |
| ----- |     | -----         | -----         | -----         |
| total |     | 7.345388E-04  | 7.896115E-04  | -1.769761E-04 |

end of program derlb

start of program geopt 11

geometry optimization step 11

```

reading input hessian of dimension    129
  in five columns format
reading input hessian of dimension    129
  in five columns format
reading input hessian of dimension    129
  in five columns format

```

Level shifts adjusted to satisfy step-size constraints

Step size: 0.0750415

Cos(theta): 0.6886741

Final level shift: -2.7962975E-02

```

energy change:          -2.9669E-04 . ( 5.0000E-05 )
gradient maximum:       3.8324E-03 . ( 4.5000E-04 )
gradient rms:           8.9140E-04 . ( 3.0000E-04 )
step size: 0.07504 trust radius: 0.07500
displacement maximum:   2.2233E-02 . ( 1.8000E-03 )
displacement rms:       5.8958E-03 . ( 1.2000E-03 )
predicted energy change: -3.7189E-04 geom step: 7.5041E-
02 full step: 7.5041E-02
molecular structure not yet converged...

```

center of mass moved by:

x: -1.1335E-03 y: -2.5596E-03 z: -2.5985E-03

new geometry:

|      | angstroms     |               |               |
|------|---------------|---------------|---------------|
| atom | x             | y             | z             |
| N1   | -0.2525386544 | 0.4310493893  | 1.1683995301  |
| N2   | -1.0138740281 | -2.2939256517 | 1.1975942074  |
| C4   | -1.2252479678 | -0.0341646614 | 1.9952733135  |
| C5   | -0.0436572270 | -1.9157862179 | 0.4851284149  |
| C6   | -1.6413071326 | -1.3541973725 | 2.0405928362  |
| C7   | -1.7145415536 | 0.9821590281  | 2.7923186325  |
| C13  | 0.6288624322  | -2.9244715472 | -0.4211405469 |
| H4   | -2.9999644294 | -2.6702187494 | 2.9946387869  |
| C8   | -2.7426672956 | 0.6546811637  | 3.6920735521  |
| C11  | -0.9497183169 | 2.1459198615  | 2.4208127750  |
| H7   | -3.1762743134 | 1.3992173904  | 4.3355281353  |
| C9   | -3.1879856910 | -0.6483570844 | 3.7409436743  |
| H8   | -3.9728895093 | -0.9095416004 | 4.4272694645  |
| C10  | -2.6429704192 | -1.6600851796 | 2.9242590216  |
| C12  | -0.0716241692 | 1.7744356070  | 1.4512907646  |
| C2   | 0.9269144697  | 2.6056206604  | 0.7453112864  |
| H13  | 1.7074422886  | -2.8817125614 | -0.2753663900 |
| C14  | 0.3076938336  | -2.7045928872 | -1.8905668910 |
| H15  | 0.2923378719  | -3.9050788522 | -0.1052980764 |
| C15  | -0.3053244872 | -2.3158522487 | -4.5878771164 |
| C16  | 1.3069751907  | -2.4063165422 | -2.8077883962 |
| C17  | -1.0079025385 | -2.8063076055 | -2.3422753578 |



|     |               |               |               |
|-----|---------------|---------------|---------------|
| C18 | -1.3113854749 | -2.6134522525 | -3.6776129076 |
| C19 | 1.0025465289  | -2.2143970874 | -4.1491423166 |
| H16 | 2.3309432563  | -2.3188574629 | -2.4786269976 |
| H17 | -1.7917111891 | -3.0332743005 | -1.6406619581 |
| H18 | -2.3295554842 | -2.6925171880 | -4.0106917005 |
| H19 | 1.7907633063  | -1.9834667927 | -4.8460183616 |
| H20 | -0.5422240742 | -2.1661899720 | -5.6255384105 |
| C1  | 0.5644095491  | -0.5120677085 | 0.4353968420  |
| H5  | 1.5708233822  | -0.5629812851 | 0.8428439319  |
| H6  | 0.6581057935  | -0.2218487346 | -0.5998173568 |
| C3  | 2.7889171356  | 4.2151427700  | -0.5660685035 |
| C26 | 1.8162112152  | 3.3890211368  | 1.4702869848  |
| C27 | 0.9775928654  | 2.6431062201  | -0.6456130349 |
| C28 | 1.9045321762  | 3.4402657775  | -1.2949648747 |
| C29 | 2.7395960663  | 4.1914658022  | 0.8181678154  |
| H1  | 1.7871549220  | 3.3588554939  | 2.5468422945  |
| H2  | 0.2728790876  | 2.0718618690  | -1.2204641568 |
| H3  | 1.9264167737  | 3.4627840599  | -2.3698183664 |
| H9  | 3.4212751180  | 4.7898184578  | 1.3932077598  |
| H10 | 3.5069237148  | 4.8342820442  | -1.0716438394 |
| H25 | -1.0577771051 | 3.1427356635  | 2.7959918279  |

nuclear repulsion energy..... 1971.488097852 hartrees

/ end of geometry optimization iteration 11 /

end of program geopt

start of program onee

smallest eigenvalue of S: 2.800E-04

number of canonical orbitals..... 461

end of program onee

start of program probe

end of program probe

start of program grid

number of gridpoints:

| atom     | N1  | N2  | C4  | C5  | C6  | C7  | C13 |
|----------|-----|-----|-----|-----|-----|-----|-----|
| H4       |     |     |     |     |     |     |     |
| grid # 1 | 96  | 102 | 86  | 88  | 89  | 88  | 84  |
| 73       |     |     |     |     |     |     |     |
| grid # 2 | 103 | 112 | 95  | 95  | 98  | 98  | 92  |
| 118      |     |     |     |     |     |     |     |
| grid # 3 | 214 | 227 | 195 | 186 | 190 | 199 | 164 |
| 224      |     |     |     |     |     |     |     |

|          |     |     |     |     |     |     |     |
|----------|-----|-----|-----|-----|-----|-----|-----|
| grid # 4 | 389 | 414 | 322 | 321 | 325 | 347 | 300 |
|----------|-----|-----|-----|-----|-----|-----|-----|

224

|                       |    |     |    |    |    |     |     |
|-----------------------|----|-----|----|----|----|-----|-----|
| number of gridpoints: |    |     |    |    |    |     |     |
| atom                  | C8 | C11 | H7 | C9 | H8 | C10 | C12 |

C2

|          |    |    |    |    |    |    |    |
|----------|----|----|----|----|----|----|----|
| grid # 1 | 89 | 86 | 73 | 87 | 73 | 89 | 86 |
|----------|----|----|----|----|----|----|----|

92

|          |    |    |     |    |     |    |    |
|----------|----|----|-----|----|-----|----|----|
| grid # 2 | 97 | 94 | 118 | 97 | 118 | 97 | 94 |
|----------|----|----|-----|----|-----|----|----|

100

|          |     |     |     |     |     |     |     |
|----------|-----|-----|-----|-----|-----|-----|-----|
| grid # 3 | 184 | 184 | 223 | 184 | 222 | 184 | 194 |
|----------|-----|-----|-----|-----|-----|-----|-----|

195

|          |     |     |     |     |     |     |     |
|----------|-----|-----|-----|-----|-----|-----|-----|
| grid # 4 | 330 | 331 | 226 | 329 | 223 | 326 | 317 |
|----------|-----|-----|-----|-----|-----|-----|-----|

343

|                       |     |     |     |     |     |     |     |
|-----------------------|-----|-----|-----|-----|-----|-----|-----|
| number of gridpoints: |     |     |     |     |     |     |     |
| atom                  | H13 | C14 | H15 | C15 | C16 | C17 | C18 |

C19

|          |    |    |    |    |    |    |    |
|----------|----|----|----|----|----|----|----|
| grid # 1 | 69 | 91 | 69 | 89 | 88 | 88 | 89 |
|----------|----|----|----|----|----|----|----|

89

|          |     |     |     |    |    |    |    |
|----------|-----|-----|-----|----|----|----|----|
| grid # 2 | 110 | 100 | 110 | 97 | 96 | 96 | 97 |
|----------|-----|-----|-----|----|----|----|----|

96

|          |     |     |     |     |     |     |     |
|----------|-----|-----|-----|-----|-----|-----|-----|
| grid # 3 | 211 | 196 | 214 | 183 | 184 | 183 | 184 |
|----------|-----|-----|-----|-----|-----|-----|-----|

183

|          |     |     |     |     |     |     |     |
|----------|-----|-----|-----|-----|-----|-----|-----|
| grid # 4 | 214 | 340 | 215 | 327 | 327 | 327 | 327 |
|----------|-----|-----|-----|-----|-----|-----|-----|

327

|                       |     |     |     |     |     |    |    |
|-----------------------|-----|-----|-----|-----|-----|----|----|
| number of gridpoints: |     |     |     |     |     |    |    |
| atom                  | H16 | H17 | H18 | H19 | H20 | C1 | H5 |

H6

|          |    |    |    |    |    |    |    |
|----------|----|----|----|----|----|----|----|
| grid # 1 | 72 | 73 | 73 | 73 | 73 | 82 | 70 |
|----------|----|----|----|----|----|----|----|

69

|          |     |     |     |     |     |    |     |
|----------|-----|-----|-----|-----|-----|----|-----|
| grid # 2 | 114 | 115 | 118 | 118 | 118 | 88 | 110 |
|----------|-----|-----|-----|-----|-----|----|-----|

104

|          |     |     |     |     |     |     |     |
|----------|-----|-----|-----|-----|-----|-----|-----|
| grid # 3 | 214 | 216 | 222 | 222 | 224 | 163 | 217 |
|----------|-----|-----|-----|-----|-----|-----|-----|

207

|          |     |     |     |     |     |     |     |
|----------|-----|-----|-----|-----|-----|-----|-----|
| grid # 4 | 214 | 214 | 224 | 223 | 224 | 292 | 217 |
|----------|-----|-----|-----|-----|-----|-----|-----|

202

|                       |    |     |     |     |     |    |    |
|-----------------------|----|-----|-----|-----|-----|----|----|
| number of gridpoints: |    |     |     |     |     |    |    |
| atom                  | C3 | C26 | C27 | C28 | C29 | H1 | H2 |

H3

|          |    |    |    |    |    |    |    |
|----------|----|----|----|----|----|----|----|
| grid # 1 | 89 | 89 | 88 | 89 | 89 | 72 | 71 |
|----------|----|----|----|----|----|----|----|

73

|          |    |    |    |    |    |     |     |
|----------|----|----|----|----|----|-----|-----|
| grid # 2 | 97 | 95 | 96 | 97 | 97 | 115 | 114 |
|----------|----|----|----|----|----|-----|-----|

118

|          |     |     |     |     |     |     |     |
|----------|-----|-----|-----|-----|-----|-----|-----|
| grid # 3 | 185 | 182 | 184 | 185 | 184 | 217 | 214 |
|----------|-----|-----|-----|-----|-----|-----|-----|

222

|          |     |     |     |     |     |     |     |
|----------|-----|-----|-----|-----|-----|-----|-----|
| grid # 4 | 328 | 327 | 331 | 327 | 328 | 217 | 212 |
|----------|-----|-----|-----|-----|-----|-----|-----|

224

number of gridpoints:

|          |     |     |     |       |
|----------|-----|-----|-----|-------|
| atom     | H9  | H10 | H25 | total |
| grid # 1 | 73  | 73  | 72  | 3516  |
| grid # 2 | 118 | 118 | 115 | 4493  |
| grid # 3 | 223 | 223 | 220 | 8631  |
| grid # 4 | 224 | 224 | 224 | 12247 |

end of program grid

start of program rwr

end of program rwr

start of program scf

|      | i | u | d | i | g |                  |         | RMS     | maximum |
|------|---|---|---|---|---|------------------|---------|---------|---------|
|      | t | p | i | c | r |                  |         | density | DIIS    |
|      | e | d | i | u | i |                  | energy  | change  | error   |
|      | r | t | s | t | d | total energy     | change  |         |         |
| etot | 1 | N | N | 1 | U | -990.38859773819 |         | 8.1E-05 | 3.6E-03 |
| etot | 2 | Y | Y | 4 | M | -990.39048554750 | 1.9E-03 | 3.8E-05 | 1.4E-03 |
| etot | 3 | Y | Y | 4 | M | -990.39075521604 | 2.7E-04 | 1.1E-05 | 3.8E-04 |
| etot | 4 | N | Y | 1 | U | -990.39078219283 | 2.7E-05 | 6.5E-06 | 1.5E-04 |
| etot | 5 | Y | Y | 4 | M | -990.39078684366 | 4.7E-06 | 1.8E-06 | 3.2E-05 |
| etot | 6 | Y | N | 4 | M | -990.39078874833 | 1.9E-06 | 0.0E+00 | 0.0E+00 |

Energy components, in hartrees:

|     |                               |                   |       |
|-----|-------------------------------|-------------------|-------|
| (A) | Nuclear repulsion.....        | 1971.48809785247  |       |
| (E) | Total one-electron terms..... | -5261.23708829039 |       |
| (I) | Total two-electron terms..... | 2299.35820168958  |       |
| (L) | Electronic energy.....        | -2961.87888660080 | (E+I) |
| (N) | Total energy.....             | -990.39078874833  | (A+L) |

SCFE: SCF energy: HF      -990.39078874833 hartrees      iterations:  
6

HOMO energy:      -0.26900  
LUMO energy:      0.09681

Orbital energies:

|           |           |           |           |           |           |
|-----------|-----------|-----------|-----------|-----------|-----------|
| -15.60450 | -15.56520 | -11.29613 | -11.28583 | -11.27124 | -11.25060 |
| -11.25060 | -11.24629 | -11.24564 | -11.24013 | -11.23934 | -11.23862 |
| -11.23812 | -11.23741 | -11.23665 | -11.23611 | -11.23489 | -11.23442 |
| -11.23272 | -11.23078 | -11.22433 | -11.21958 | -11.21829 | -11.21571 |
| -11.21257 | -1.32518  | -1.24924  | -1.16401  | -1.16055  | -1.13914  |
| -1.07477  | -1.06714  | -1.04013  | -1.02193  | -1.01901  | -1.01706  |
| -0.97170  | -0.95432  | -0.93398  | -0.86039  | -0.83766  | -0.83356  |
| -0.82897  | -0.80722  | -0.79561  | -0.77030  | -0.73280  | -0.71772  |
| -0.70154  | -0.69847  | -0.66672  | -0.65798  | -0.64297  | -0.63737  |

|          |          |          |          |          |          |
|----------|----------|----------|----------|----------|----------|
| -0.63423 | -0.62375 | -0.62103 | -0.61586 | -0.59622 | -0.59244 |
| -0.59059 | -0.58747 | -0.57852 | -0.55830 | -0.55278 | -0.54840 |
| -0.54412 | -0.51758 | -0.50739 | -0.50284 | -0.50056 | -0.49599 |
| -0.49355 | -0.49122 | -0.48722 | -0.48146 | -0.42973 | -0.40470 |
| -0.36763 | -0.34405 | -0.34100 | -0.33769 | -0.32924 | -0.28262 |
| -0.26900 | 0.09681  | 0.12911  | 0.13706  | 0.13737  | 0.14842  |
| 0.17898  | 0.20870  | 0.22842  | 0.23520  | 0.24150  |          |

end of program scf

start of program derla  
end of program derla

start of program rwr  
end of program rwr

start of program derlb

forces (hartrees/bohr) : total

| atom | label | x             | y             | z             |
|------|-------|---------------|---------------|---------------|
| 1    | N1    | 7.004627E-04  | -5.345029E-04 | -8.693736E-04 |
| 2    | N2    | 1.325105E-03  | 4.490218E-04  | -1.207276E-03 |
| 3    | C4    | 6.466353E-04  | -1.748891E-03 | -5.276414E-04 |
| 4    | C5    | -1.583901E-03 | -5.770104E-05 | 1.464054E-03  |
| 5    | C6    | 2.273493E-03  | -1.141576E-03 | -2.212237E-03 |
| 6    | C7    | -6.504121E-04 | 1.484241E-03  | 1.389573E-04  |
| 7    | C13   | -1.049263E-04 | -1.124955E-03 | 1.171673E-03  |
| 8    | H4    | -4.026407E-04 | -9.691760E-04 | -5.464798E-05 |
| 9    | C8    | -9.303924E-04 | -6.391797E-04 | 4.551451E-04  |
| 10   | C11   | 6.920090E-04  | 1.520404E-03  | 3.671516E-04  |
| 11   | H7    | -7.863954E-05 | 4.226999E-04  | 2.440591E-04  |
| 12   | C9    | -2.025401E-04 | 1.476436E-03  | 5.741089E-04  |
| 13   | H8    | -5.400360E-04 | -1.340263E-04 | 4.904071E-04  |
| 14   | C10   | -7.800840E-05 | -1.362858E-04 | 6.780081E-04  |
| 15   | C12   | -2.323231E-04 | -3.858693E-04 | 8.130474E-04  |
| 16   | C2    | -1.650918E-03 | -1.050059E-03 | -4.870314E-04 |
| 17   | H13   | -1.249323E-03 | 3.298007E-04  | -3.456024E-04 |
| 18   | C14   | 3.372735E-04  | 3.524076E-05  | -8.065477E-04 |
| 19   | H15   | 3.415639E-04  | 3.736382E-04  | -5.501722E-04 |
| 20   | C15   | -7.211408E-05 | -4.291507E-04 | 1.165413E-03  |
| 21   | C16   | 1.485377E-04  | 5.669822E-04  | 3.571922E-04  |
| 22   | C17   | 9.294633E-04  | 4.954721E-05  | 8.698192E-04  |
| 23   | C18   | 1.506381E-03  | 3.791037E-04  | -2.957498E-04 |
| 24   | C19   | 1.342766E-03  | 5.454351E-04  | -6.709570E-04 |
| 25   | H16   | -1.552766E-03 | -6.560598E-04 | -2.441234E-04 |
| 26   | H17   | 1.700841E-04  | -9.802381E-05 | 1.903320E-04  |
| 27   | H18   | -1.365794E-03 | -2.753192E-04 | -2.401760E-04 |

|       |       |               |               |               |
|-------|-------|---------------|---------------|---------------|
| 28    | H19   | -6.056477E-04 | -1.969351E-04 | 3.560983E-04  |
| 29    | H20   | -1.099160E-04 | 1.214393E-04  | -7.279111E-04 |
| 30    | C1    | -1.851382E-03 | -1.238949E-04 | 1.290145E-03  |
| 31    | H5    | 1.574782E-03  | 1.314021E-04  | 1.035441E-03  |
| 32    | H6    | 3.969414E-04  | 6.577154E-04  | -2.503026E-03 |
| 33    | C3    | 1.115385E-03  | 1.071782E-03  | 1.756491E-03  |
| 34    | C26   | 1.717762E-03  | 1.497857E-03  | 2.251613E-03  |
| 35    | C27   | 3.012996E-04  | 7.204426E-04  | -9.322043E-04 |
| 36    | C28   | -1.972431E-03 | -1.672589E-03 | -1.659435E-03 |
| 37    | C29   | -8.471681E-04 | -7.644455E-04 | 8.396384E-04  |
| 38    | H1    | 2.871811E-04  | 2.205505E-04  | -1.629586E-03 |
| 39    | H2    | -7.152317E-04 | -9.510178E-04 | -5.023593E-04 |
| 40    | H3    | 1.101136E-05  | -8.687548E-05 | -4.894680E-04 |
| 41    | H9    | 1.039112E-03  | 8.927797E-04  | 5.902413E-04  |
| 42    | H10   | 7.541013E-04  | 6.428744E-04  | -3.083269E-04 |
| 43    | H25   | -2.161468E-04 | 5.428347E-04  | 2.594211E-04  |
| ----- |       |               |               |               |
|       | total | 5.986926E-04  | 9.556962E-04  | 9.460540E-05  |

end of program derlb

start of program geopt 12

geometry optimization step 12

reading input hessian of dimension 129

in five columns format

reading input hessian of dimension 129

in five columns format

Level shifts adjusted to satisfy step-size constraints

Step size: 0.0381814

Cos(theta): 0.6358626

Final level shift: -2.2947896E-02

energy change: 3.1850E-05 \* ( 5.0000E-05 )

gradient maximum: 3.7159E-03 . ( 4.5000E-04 )

gradient rms: 7.8551E-04 . ( 3.0000E-04 )

step size: 0.03818 trust radius: 0.03750

displacement maximum: 1.1555E-02 . ( 1.8000E-03 )

displacement rms: 2.9998E-03 . ( 1.2000E-03 )

predicted energy change: -1.3809E-04 geom step: 3.8181E-

02 full step: 3.8181E-02

molecular structure not yet converged...

center of mass moved by:

x: 4.5426E-04 y: 8.1147E-04 z: -6.7642E-04

new geometry:

angstroms

| atom | x             | y             | z             |
|------|---------------|---------------|---------------|
| N1   | -0.2481100487 | 0.4334566292  | 1.1690590843  |
| N2   | -1.0032005669 | -2.2934581620 | 1.1949409475  |
| C4   | -1.2219414340 | -0.0343838020 | 1.9923563545  |
| C5   | -0.0339796710 | -1.9120602342 | 0.4839591872  |
| C6   | -1.6327378826 | -1.3563177585 | 2.0371288910  |
| C7   | -1.7214706152 | 0.9842720805  | 2.7832559656  |
| C13  | 0.6387689584  | -2.9205192316 | -0.4241415240 |
| H4   | -2.9960643356 | -2.6736608684 | 2.9862523038  |
| C8   | -2.7543266162 | 0.6556694707  | 3.6773710238  |
| C11  | -0.9567330317 | 2.1503186557  | 2.4169640341  |
| H7   | -3.1942470497 | 1.4021628828  | 4.3154141299  |
| C9   | -3.1938710405 | -0.6480229029 | 3.7284797792  |
| H8   | -3.9830026483 | -0.9107663027 | 4.4110346409  |
| C10  | -2.6387220303 | -1.6617110159 | 2.9180186584  |
| C12  | -0.0739060768 | 1.7781436478  | 1.4520699323  |
| C2   | 0.9254724195  | 2.6102272532  | 0.7486369541  |
| H13  | 1.7151095547  | -2.8707079086 | -0.2840967415 |
| C14  | 0.3101739106  | -2.7047976511 | -1.8919547337 |
| H15  | 0.3108881878  | -3.9021230759 | -0.1082165064 |
| C15  | -0.3249288630 | -2.3285963028 | -4.5840286299 |
| C16  | 1.2990880581  | -2.4022115814 | -2.8172990363 |
| C17  | -1.0064246650 | -2.8179513158 | -2.3322450242 |
| C18  | -1.3210023891 | -2.6315174078 | -3.6652839004 |
| C19  | 0.9856382061  | -2.2157562838 | -4.1570604658 |
| H16  | 2.3222336572  | -2.3129300127 | -2.4940718207 |
| H17  | -1.7807423369 | -3.0503320668 | -1.6229685692 |
| H18  | -2.3412419940 | -2.7221754401 | -3.9894950791 |
| H19  | 1.7641119017  | -1.9818956103 | -4.8615237321 |
| H20  | -0.5712857690 | -2.1834408899 | -5.6215168996 |
| C1   | 0.5743863458  | -0.5077215009 | 0.4405346425  |
| H5   | 1.5783628755  | -0.5595077770 | 0.8633906677  |
| H6   | 0.6828551014  | -0.2141085169 | -0.5964581000 |
| C3   | 2.7976584351  | 4.2167944296  | -0.5536768887 |
| C26  | 1.8195941604  | 3.3876491689  | 1.4793453416  |
| C27  | 0.9766033142  | 2.6525116204  | -0.6445526402 |
| C28  | 1.9079513036  | 3.4480386227  | -1.2902513713 |
| C29  | 2.7477220187  | 4.1880060271  | 0.8321252429  |
| H1   | 1.7898857173  | 3.3527087763  | 2.5543504826  |
| H2   | 0.2700912980  | 2.0817515541  | -1.2208892319 |
| H3   | 1.9329210192  | 3.4750874837  | -2.3661874570 |
| H9   | 3.4352847020  | 4.7809146017  | 1.4097776804  |
| H10  | 3.5220132279  | 4.8352318702  | -1.0559521854 |
| H25  | -1.0710358057 | 3.1480250996  | 2.7899724688  |

nuclear repulsion energy..... 1971.062170283 hartrees

/ end of geometry optimization iteration 12 /

end of program geopt

```

start of program onee
smallest eigenvalue of S:      2.810E-04
number of canonical orbitals.....      461
end of program onee

```

```

start of program probe
end of program probe

```

```

start of program grid

```

```

number of gridpoints:
  atom      N1      N2      C4      C5      C6      C7      C13
H4
  grid # 1      95      102      87      87      90      89      84
73
  grid # 2      103      112      95      95      99      98      92
118
  grid # 3      214      227      195      187      191      199      163
224
  grid # 4      385      414      321      320      323      348      299
224

```

```

number of gridpoints:
  atom      C8      C11      H7      C9      H8      C10      C12
C2
  grid # 1      89      86      73      87      73      89      86
92
  grid # 2      97      94      118      97      118      97      94
100
  grid # 3      184      185      223      184      222      184      194
195
  grid # 4      328      331      226      331      223      329      317
343

```

```

number of gridpoints:
  atom      H13      C14      H15      C15      C16      C17      C18
C19
  grid # 1      69      91      69      89      88      87      89
89
  grid # 2      109      100      110      97      96      96      97
96
  grid # 3      211      196      214      183      184      182      184
183
  grid # 4      214      340      213      327      327      327      327
327

```

```

number of gridpoints:
  atom      H16      H17      H18      H19      H20      C1      H5
H6

```

|          |     |     |     |     |     |     |     |
|----------|-----|-----|-----|-----|-----|-----|-----|
| grid # 1 | 72  | 73  | 73  | 73  | 73  | 82  | 70  |
| grid # 2 | 114 | 114 | 118 | 118 | 118 | 88  | 109 |
| grid # 3 | 214 | 216 | 222 | 221 | 224 | 164 | 217 |
| grid # 4 | 214 | 214 | 224 | 223 | 224 | 292 | 219 |

number of gridpoints:

|          |     |     |     |     |     |     |     |
|----------|-----|-----|-----|-----|-----|-----|-----|
| atom     | C3  | C26 | C27 | C28 | C29 | H1  | H2  |
| grid # 1 | 89  | 88  | 88  | 89  | 89  | 72  | 71  |
| grid # 2 | 97  | 95  | 96  | 97  | 97  | 115 | 114 |
| grid # 3 | 185 | 182 | 184 | 185 | 185 | 217 | 213 |
| grid # 4 | 328 | 327 | 330 | 328 | 328 | 217 | 212 |

number of gridpoints:

|          |     |     |     |       |
|----------|-----|-----|-----|-------|
| atom     | H9  | H10 | H25 | total |
| grid # 1 | 73  | 73  | 72  | 3515  |
| grid # 2 | 118 | 118 | 115 | 4491  |
| grid # 3 | 223 | 224 | 220 | 8634  |
| grid # 4 | 224 | 224 | 224 | 12246 |

end of program grid

start of program rwr  
end of program rwr

start of program scf

|      | i | u | d | i | g |                  |         | RMS     | maximum |
|------|---|---|---|---|---|------------------|---------|---------|---------|
|      | t | p | i | c | r |                  |         | density | DIIS    |
|      | e | d | i | u | i |                  | energy  | change  | error   |
|      | r | t | s | t | d | total energy     | change  |         |         |
| etot | 1 | N | N | 1 | U | -990.39028009303 |         | 4.3E-05 | 2.4E-03 |
| etot | 2 | Y | Y | 4 | M | -990.39078089231 | 5.0E-04 | 1.8E-05 | 5.5E-04 |
| etot | 3 | Y | Y | 4 | M | -990.39083518771 | 5.4E-05 | 4.9E-06 | 1.2E-04 |
| etot | 4 | Y | N | 4 | M | -990.39084155577 | 6.4E-06 | 0.0E+00 | 0.0E+00 |

Energy components, in hartrees:

|     |                               |                   |
|-----|-------------------------------|-------------------|
| (A) | Nuclear repulsion.....        | 1971.06217028341  |
| (E) | Total one-electron terms..... | -5260.39454868744 |
| (I) | Total two-electron terms..... | 2298.94153684826  |



(L) Electronic energy..... -2961.45301183918 (E+I)  
 (N) Total energy..... -990.39084155577 (A+L)

SCFE: SCF energy: HF -990.39084155577 hartrees iterations:  
 4

HOMO energy: -0.26906  
 LUMO energy: 0.09673

Orbital energies:

|           |           |           |           |           |           |
|-----------|-----------|-----------|-----------|-----------|-----------|
| -15.60462 | -15.56496 | -11.29644 | -11.28704 | -11.27124 | -11.25104 |
| -11.25071 | -11.24585 | -11.24537 | -11.24021 | -11.23959 | -11.23927 |
| -11.23874 | -11.23808 | -11.23742 | -11.23573 | -11.23438 | -11.23415 |
| -11.23269 | -11.23001 | -11.22431 | -11.22021 | -11.21853 | -11.21599 |
| -11.21287 | -1.32532  | -1.24973  | -1.16308  | -1.16069  | -1.13877  |
| -1.07464  | -1.06716  | -1.03922  | -1.02184  | -1.01901  | -1.01724  |
| -0.97091  | -0.95440  | -0.93382  | -0.86015  | -0.83698  | -0.83354  |
| -0.82928  | -0.80716  | -0.79551  | -0.77003  | -0.73266  | -0.71746  |
| -0.70102  | -0.69855  | -0.66633  | -0.65789  | -0.64293  | -0.63722  |
| -0.63387  | -0.62365  | -0.62070  | -0.61586  | -0.59633  | -0.59238  |
| -0.59043  | -0.58757  | -0.57842  | -0.55802  | -0.55233  | -0.54821  |
| -0.54447  | -0.51739  | -0.50720  | -0.50256  | -0.50022  | -0.49593  |
| -0.49341  | -0.49120  | -0.48742  | -0.48125  | -0.42975  | -0.40484  |
| -0.36746  | -0.34335  | -0.34121  | -0.33758  | -0.32931  | -0.28234  |
| -0.26906  | 0.09673   | 0.12890   | 0.13698   | 0.13758   | 0.14860   |
| 0.17856   | 0.20869   | 0.22823   | 0.23521   | 0.24124   |           |

end of program scf

start of program der1a  
 end of program der1a

start of program rwr  
 end of program rwr

start of program der1b

forces (hartrees/bohr) : total

| atom | label | x             | y             | z             |
|------|-------|---------------|---------------|---------------|
| ---- | ----- | -----         | -----         | -----         |
| 1    | N1    | 2.227998E-04  | 3.002457E-04  | -7.633866E-04 |
| 2    | N2    | 8.313377E-04  | 6.278822E-05  | -8.329915E-04 |
| 3    | C4    | -2.749466E-04 | -4.216903E-04 | -5.263447E-07 |
| 4    | C5    | -6.186970E-04 | -7.144881E-04 | 3.670361E-04  |
| 5    | C6    | 2.786252E-04  | 3.974446E-05  | -3.989161E-04 |
| 6    | C7    | 9.204291E-05  | 2.064961E-04  | 1.809267E-04  |
| 7    | C13   | -2.647782E-04 | 7.202521E-04  | 7.337563E-04  |

|       |     |               |               |               |
|-------|-----|---------------|---------------|---------------|
| 8     | H4  | 4.755602E-05  | 2.153163E-04  | 1.133755E-04  |
| 9     | C8  | -3.968861E-04 | 6.246385E-04  | 6.455230E-04  |
| 10    | C11 | 1.871446E-05  | 4.167742E-04  | -1.449800E-04 |
| 11    | H7  | 4.661710E-05  | -2.622866E-05 | 2.075457E-05  |
| 12    | C9  | -4.135986E-04 | -8.043030E-04 | 2.383556E-04  |
| 13    | H8  | 9.219046E-05  | 1.817128E-05  | -3.487273E-05 |
| 14    | C10 | -5.487297E-04 | -5.031939E-04 | 3.007736E-04  |
| 15    | C12 | 4.545402E-04  | 3.326283E-05  | 3.764629E-06  |
| 16    | C2  | 3.716824E-04  | 4.474287E-04  | -1.073648E-03 |
| 17    | H13 | 6.660705E-04  | 2.713936E-04  | -4.580298E-05 |
| 18    | C14 | -9.524221E-06 | -1.503978E-05 | -1.155393E-04 |
| 19    | H15 | -2.589289E-04 | -4.741291E-04 | 1.596626E-04  |
| 20    | C15 | -3.296994E-04 | -8.513451E-05 | -3.637118E-04 |
| 21    | C16 | 5.059299E-04  | 2.273868E-04  | 1.343442E-04  |
| 22    | C17 | 1.784530E-04  | 6.295302E-06  | 3.790300E-04  |
| 23    | C18 | 4.746219E-04  | 1.823099E-04  | -5.954331E-04 |
| 24    | C19 | -1.022632E-04 | 1.979797E-04  | 6.156296E-05  |
| 25    | H16 | 3.316220E-04  | -1.320570E-04 | 5.700000E-06  |
| 26    | H17 | -4.687600E-04 | -9.797374E-05 | 2.750276E-04  |
| 27    | H18 | -1.205098E-03 | -6.438215E-05 | -3.681211E-04 |
| 28    | H19 | 4.370449E-04  | -4.587109E-06 | -2.768543E-05 |
| 29    | H20 | 1.076385E-05  | -4.651129E-05 | 2.680799E-04  |
| 30    | C1  | 1.139672E-03  | 1.536346E-04  | 3.587566E-04  |
| 31    | H5  | -4.346405E-04 | -9.406025E-07 | -3.907024E-04 |
| 32    | H6  | -1.517462E-04 | -9.902310E-05 | 3.357495E-04  |
| 33    | C3  | 1.185490E-04  | 2.269726E-04  | 5.102438E-04  |
| 34    | C26 | -2.577180E-06 | 8.957851E-05  | -5.609457E-05 |
| 35    | C27 | 1.261047E-04  | 2.099169E-04  | 7.317389E-04  |
| 36    | C28 | 2.097073E-04  | 1.577945E-04  | 1.716548E-04  |
| 37    | C29 | 3.597928E-05  | -6.029637E-05 | -9.796868E-04 |
| 38    | H1  | 9.699556E-05  | 7.995279E-05  | -5.711064E-04 |
| 39    | H2  | 8.836115E-05  | -5.681230E-05 | 5.451637E-05  |
| 40    | H3  | -2.236567E-05 | -8.217920E-05 | 5.481682E-04  |
| 41    | H9  | -1.316816E-04 | 3.301862E-05  | -1.580912E-04 |
| 42    | H10 | -5.437240E-04 | -3.859753E-04 | 3.434680E-04  |
| 43    | H25 | -4.214022E-06 | -3.049285E-05 | 3.941865E-06  |
| ----- |     |               |               |               |
| total |     | 6.931218E-04  | 8.159137E-04  | 2.461458E-05  |

end of program derlb

start of program geopt 13

geometry optimization step 13

reading input hessian of dimension 129

in five columns format

reading input hessian of dimension 129

in five columns format

Level shifts adjusted to satisfy step-size constraints

Step size: 0.0192086  
Cos(theta): 0.7007821

Final level shift: -6.0023224E-02

energy change: -5.2807E-05 . ( 5.0000E-05 )  
gradient maximum: 1.3227E-03 . ( 4.5000E-04 )  
gradient rms: 3.7901E-04 . ( 3.0000E-04 )  
step size: 0.01921 trust radius: 0.01875  
displacement maximum: 6.9080E-03 . ( 1.8000E-03 )  
displacement rms: 1.5092E-03 . ( 1.2000E-03 )  
predicted energy change: -4.3542E-05 geom step: 1.9209E-  
02 full step: 1.9209E-02  
molecular structure not yet converged...

center of mass moved by:

x: -2.9109E-04 y: 4.6312E-04 z: 3.9301E-04

new geometry:

|      | angstroms     |               |               |
|------|---------------|---------------|---------------|
| atom | x             | y             | z             |
| N1   | -0.2488255692 | 0.4322339843  | 1.1698872896  |
| N2   | -1.0058226391 | -2.2950440448 | 1.1945544518  |
| C4   | -1.2229240041 | -0.0361424909 | 1.9939013709  |
| C5   | -0.0365007616 | -1.9141015496 | 0.4855354067  |
| C6   | -1.6347093114 | -1.3580296563 | 2.0375911084  |
| C7   | -1.7199951420 | 0.9823189968  | 2.7870807318  |
| C13  | 0.6348421100  | -2.9216660268 | -0.4233610698 |
| H4   | -2.9973932708 | -2.6761090969 | 2.9877417657  |
| C8   | -2.7524946331 | 0.6532233934  | 3.6829849331  |
| C11  | -0.9547024201 | 2.1488365611  | 2.4190560905  |
| H7   | -3.1905897249 | 1.3985912480  | 4.3231430452  |
| C9   | -3.1932086574 | -0.6517690880 | 3.7325641745  |
| H8   | -3.9812949477 | -0.9149495298 | 4.4155551603  |
| C10  | -2.6401022769 | -1.6646647698 | 2.9195236102  |
| C12  | -0.0728836370 | 1.7767980278  | 1.4534342970  |
| C2   | 0.9248616477  | 2.6094547063  | 0.7465477863  |
| H13  | 1.7116541383  | -2.8719037968 | -0.2842566294 |
| C14  | 0.3090127646  | -2.7017285669 | -1.8919217197 |
| H15  | 0.3057087418  | -3.9036615388 | -0.1088356875 |
| C15  | -0.3181517155 | -2.3211174476 | -4.5844573536 |
| C16  | 1.3022806045  | -2.4054300452 | -2.8151364504 |
| C17  | -1.0074098438 | -2.8056006886 | -2.3339389563 |
| C18  | -1.3187367817 | -2.6172398029 | -3.6681293975 |
| C19  | 0.9926701615  | -2.2159193741 | -4.1546871043 |
| H16  | 2.3260666979  | -2.3274211924 | -2.4914155295 |
| H17  | -1.7860704955 | -3.0349791182 | -1.6266254226 |
| H18  | -2.3425831130 | -2.7043182588 | -3.9940814180 |
| H19  | 1.7761371458  | -1.9889515630 | -4.8563274949 |
| H20  | -0.5618666539 | -2.1757307323 | -5.6219403179 |
| C1   | 0.5740559454  | -0.5100177170 | 0.4417086690  |
| H5   | 1.5784350739  | -0.5618273663 | 0.8611698811  |

|     |               |               |               |
|-----|---------------|---------------|---------------|
| H6  | 0.6798161828  | -0.2186286872 | -0.5959096950 |
| C3  | 2.7946536701  | 4.2153968164  | -0.5592303079 |
| C26 | 1.8165501131  | 3.3931684312  | 1.4740306347  |
| C27 | 0.9780419294  | 2.6451051479  | -0.6454457865 |
| C28 | 1.9082602778  | 3.4400244963  | -1.2927166344 |
| C29 | 2.7429412688  | 4.1934511473  | 0.8251154766  |
| H1  | 1.7882002850  | 3.3627714017  | 2.5482192846  |
| H2  | 0.2755486666  | 2.0683734653  | -1.2209902818 |
| H3  | 1.9348576060  | 3.4600611274  | -2.3678965230 |
| H9  | 3.4273881104  | 4.7918441078  | 1.4013512856  |
| H10 | 3.5166904418  | 4.8328913912  | -1.0628356014 |
| H25 | -1.0679447669 | 3.1461658281  | 2.7930681050  |

nuclear repulsion energy..... 1971.091366916 hartrees

/ end of geometry optimization iteration 13 /

end of program geopt

start of program onee

smallest eigenvalue of S: 2.824E-04

number of canonical orbitals..... 461

end of program onee

start of program probe

end of program probe

start of program grid

number of gridpoints:

| atom     | N1  | N2  | C4  | C5  | C6  | C7  | C13 |
|----------|-----|-----|-----|-----|-----|-----|-----|
| H4       |     |     |     |     |     |     |     |
| grid # 1 | 96  | 102 | 87  | 87  | 90  | 90  | 84  |
| 73       |     |     |     |     |     |     |     |
| grid # 2 | 103 | 112 | 95  | 95  | 99  | 98  | 92  |
| 118      |     |     |     |     |     |     |     |
| grid # 3 | 214 | 227 | 195 | 187 | 191 | 199 | 163 |
| 224      |     |     |     |     |     |     |     |
| grid # 4 | 389 | 414 | 321 | 320 | 323 | 347 | 299 |
| 224      |     |     |     |     |     |     |     |

number of gridpoints:

| atom     | C8 | C11 | H7  | C9 | H8  | C10 | C12 |
|----------|----|-----|-----|----|-----|-----|-----|
| C2       |    |     |     |    |     |     |     |
| grid # 1 | 89 | 86  | 73  | 87 | 73  | 89  | 86  |
| 92       |    |     |     |    |     |     |     |
| grid # 2 | 97 | 94  | 118 | 97 | 118 | 97  | 94  |
| 100      |    |     |     |    |     |     |     |

|          |     |     |     |     |     |     |     |
|----------|-----|-----|-----|-----|-----|-----|-----|
| grid # 3 | 184 | 185 | 223 | 184 | 222 | 184 | 194 |
|----------|-----|-----|-----|-----|-----|-----|-----|

196

|          |     |     |     |     |     |     |     |
|----------|-----|-----|-----|-----|-----|-----|-----|
| grid # 4 | 329 | 331 | 226 | 331 | 223 | 329 | 317 |
|----------|-----|-----|-----|-----|-----|-----|-----|

341

number of gridpoints:

|      |     |     |     |     |     |     |     |
|------|-----|-----|-----|-----|-----|-----|-----|
| atom | H13 | C14 | H15 | C15 | C16 | C17 | C18 |
|------|-----|-----|-----|-----|-----|-----|-----|

C19

|          |    |    |    |    |    |    |    |
|----------|----|----|----|----|----|----|----|
| grid # 1 | 69 | 93 | 69 | 89 | 88 | 88 | 89 |
|----------|----|----|----|----|----|----|----|

89

|          |     |     |     |    |    |    |    |
|----------|-----|-----|-----|----|----|----|----|
| grid # 2 | 109 | 100 | 110 | 97 | 96 | 96 | 97 |
|----------|-----|-----|-----|----|----|----|----|

96

|          |     |     |     |     |     |     |     |
|----------|-----|-----|-----|-----|-----|-----|-----|
| grid # 3 | 210 | 195 | 214 | 183 | 184 | 183 | 184 |
|----------|-----|-----|-----|-----|-----|-----|-----|

183

|          |     |     |     |     |     |     |     |
|----------|-----|-----|-----|-----|-----|-----|-----|
| grid # 4 | 214 | 340 | 213 | 327 | 327 | 327 | 327 |
|----------|-----|-----|-----|-----|-----|-----|-----|

327

number of gridpoints:

|      |     |     |     |     |     |    |    |
|------|-----|-----|-----|-----|-----|----|----|
| atom | H16 | H17 | H18 | H19 | H20 | C1 | H5 |
|------|-----|-----|-----|-----|-----|----|----|

H6

|          |    |    |    |    |    |    |    |
|----------|----|----|----|----|----|----|----|
| grid # 1 | 72 | 73 | 73 | 73 | 73 | 82 | 70 |
|----------|----|----|----|----|----|----|----|

69

|          |     |     |     |     |     |    |     |
|----------|-----|-----|-----|-----|-----|----|-----|
| grid # 2 | 114 | 115 | 118 | 118 | 118 | 88 | 110 |
|----------|-----|-----|-----|-----|-----|----|-----|

104

|          |     |     |     |     |     |     |     |
|----------|-----|-----|-----|-----|-----|-----|-----|
| grid # 3 | 214 | 216 | 223 | 222 | 224 | 164 | 217 |
|----------|-----|-----|-----|-----|-----|-----|-----|

207

|          |     |     |     |     |     |     |     |
|----------|-----|-----|-----|-----|-----|-----|-----|
| grid # 4 | 214 | 214 | 224 | 223 | 224 | 293 | 217 |
|----------|-----|-----|-----|-----|-----|-----|-----|

205

number of gridpoints:

|      |    |     |     |     |     |    |    |
|------|----|-----|-----|-----|-----|----|----|
| atom | C3 | C26 | C27 | C28 | C29 | H1 | H2 |
|------|----|-----|-----|-----|-----|----|----|

H3

|          |    |    |    |    |    |    |    |
|----------|----|----|----|----|----|----|----|
| grid # 1 | 89 | 88 | 88 | 89 | 89 | 72 | 71 |
|----------|----|----|----|----|----|----|----|

73

|          |    |    |    |    |    |     |     |
|----------|----|----|----|----|----|-----|-----|
| grid # 2 | 97 | 95 | 96 | 97 | 97 | 115 | 114 |
|----------|----|----|----|----|----|-----|-----|

118

|          |     |     |     |     |     |     |     |
|----------|-----|-----|-----|-----|-----|-----|-----|
| grid # 3 | 185 | 182 | 184 | 184 | 185 | 217 | 213 |
|----------|-----|-----|-----|-----|-----|-----|-----|

223

|          |     |     |     |     |     |     |     |
|----------|-----|-----|-----|-----|-----|-----|-----|
| grid # 4 | 328 | 328 | 329 | 328 | 328 | 217 | 212 |
|----------|-----|-----|-----|-----|-----|-----|-----|

224

number of gridpoints:

|          |     |     |     |       |
|----------|-----|-----|-----|-------|
| atom     | H9  | H10 | H25 | total |
| grid # 1 | 73  | 73  | 72  | 3520  |
| grid # 2 | 118 | 118 | 115 | 4493  |
| grid # 3 | 223 | 223 | 220 | 8634  |
| grid # 4 | 224 | 224 | 224 | 12246 |

end of program grid

start of program rwr

end of program rwr

start of program scf

|      | i | u | d | i | g |                  |         | RMS     | maximum |
|------|---|---|---|---|---|------------------|---------|---------|---------|
|      | t | p | i | c | r |                  |         | density | DIIS    |
|      | e | d | i | u | i | energy           | energy  | change  | error   |
|      | r | t | s | t | d | total energy     | change  |         |         |
| etot | 1 | N | N | 1 | U | -990.39066938504 |         | 2.3E-05 | 1.1E-03 |
| etot | 2 | Y | Y | 4 | M | -990.39082701468 | 1.6E-04 | 1.1E-05 | 4.2E-04 |
| etot | 3 | Y | Y | 4 | M | -990.39084593688 | 1.9E-05 | 3.2E-06 | 1.1E-04 |
| etot | 4 | Y | N | 4 | M | -990.39084898231 | 3.0E-06 | 0.0E+00 | 0.0E+00 |

Energy components, in hartrees:

|     |                               |                   |       |
|-----|-------------------------------|-------------------|-------|
| (A) | Nuclear repulsion.....        | 1971.09136691580  |       |
| (E) | Total one-electron terms..... | -5260.45116671076 |       |
| (I) | Total two-electron terms..... | 2298.96895081265  |       |
| (L) | Electronic energy.....        | -2961.48221589810 | (E+I) |
| (N) | Total energy.....             | -990.39084898231  | (A+L) |

SCFE: SCF energy: HF      -990.39084898231 hartrees      iterations:  
4

HOMO energy:      -0.26909  
LUMO energy:      0.09670

Orbital energies:

|           |           |           |           |           |           |
|-----------|-----------|-----------|-----------|-----------|-----------|
| -15.60482 | -15.56511 | -11.29607 | -11.28679 | -11.27163 | -11.25115 |
| -11.25090 | -11.24617 | -11.24561 | -11.23984 | -11.23956 | -11.23889 |
| -11.23843 | -11.23775 | -11.23701 | -11.23573 | -11.23460 | -11.23444 |
| -11.23276 | -11.23041 | -11.22479 | -11.22011 | -11.21902 | -11.21611 |
| -11.21311 | -1.32505  | -1.25012  | -1.16329  | -1.16072  | -1.13844  |
| -1.07455  | -1.06701  | -1.03926  | -1.02193  | -1.01882  | -1.01722  |
| -0.97108  | -0.95429  | -0.93372  | -0.86021  | -0.83691  | -0.83360  |
| -0.82903  | -0.80715  | -0.79555  | -0.77004  | -0.73267  | -0.71741  |
| -0.70115  | -0.69841  | -0.66628  | -0.65791  | -0.64291  | -0.63702  |
| -0.63380  | -0.62376  | -0.62069  | -0.61579  | -0.59625  | -0.59229  |
| -0.59055  | -0.58752  | -0.57825  | -0.55807  | -0.55233  | -0.54821  |
| -0.54447  | -0.51744  | -0.50724  | -0.50258  | -0.50023  | -0.49595  |
| -0.49354  | -0.49120  | -0.48746  | -0.48116  | -0.42969  | -0.40485  |
| -0.36758  | -0.34333  | -0.34129  | -0.33767  | -0.32932  | -0.28244  |
| -0.26909  | 0.09670   | 0.12895   | 0.13716   | 0.13754   | 0.14851   |
| 0.17843   | 0.20872   | 0.22830   | 0.23522   | 0.24111   |           |

end of program scf

start of program der1a

end of program derla

start of program rwr

end of program rwr

start of program derlb

forces (hartrees/bohr) : total

| atom | label | x             | y             | z             |
|------|-------|---------------|---------------|---------------|
| ---  | ---   | -----         | -----         | -----         |
| 1    | N1    | 4.528739E-04  | -2.150721E-04 | -7.189734E-04 |
| 2    | N2    | -5.179471E-04 | -3.795031E-05 | 3.540438E-04  |
| 3    | C4    | 1.453513E-04  | -6.415916E-05 | 2.186439E-05  |
| 4    | C5    | 7.956954E-04  | -7.125645E-05 | -6.055630E-04 |
| 5    | C6    | 1.674864E-04  | -8.425208E-05 | -1.081652E-04 |
| 6    | C7    | -2.512909E-04 | 2.681225E-04  | 1.706745E-04  |
| 7    | C13   | 2.264142E-04  | 5.762714E-04  | 8.823663E-05  |
| 8    | H4    | -6.045948E-05 | -1.622022E-04 | 5.346281E-05  |
| 9    | C8    | -9.811810E-06 | -6.163186E-04 | -1.033681E-04 |
| 10   | C11   | -3.140914E-04 | -5.043245E-07 | 3.741302E-04  |
| 11   | H7    | -7.779658E-05 | 9.048357E-05  | 3.931211E-05  |
| 12   | C9    | 2.767482E-04  | 5.658957E-04  | -1.033924E-04 |
| 13   | H8    | -1.429809E-04 | -1.901601E-05 | 1.548469E-04  |
| 14   | C10   | -7.750078E-05 | 3.688975E-04  | 2.521305E-04  |
| 15   | C12   | 4.616740E-04  | 5.257927E-06  | -2.829912E-04 |
| 16   | C2    | 2.944823E-04  | 2.233180E-04  | 5.568139E-04  |
| 17   | H13   | 4.427948E-04  | 6.578201E-05  | 1.726383E-04  |
| 18   | C14   | 1.282378E-04  | -1.306465E-04 | 5.130233E-04  |
| 19   | H15   | -1.131664E-04 | -2.810631E-04 | -3.533440E-05 |
| 20   | C15   | -5.253545E-04 | 1.215568E-05  | -8.190267E-05 |
| 21   | C16   | 1.228580E-04  | -7.128547E-05 | 5.101624E-04  |
| 22   | C17   | -7.451867E-04 | -2.526086E-04 | 2.209580E-04  |
| 23   | C18   | -1.326991E-03 | -2.850276E-04 | -7.335060E-04 |
| 24   | C19   | -1.692902E-04 | 6.245857E-06  | -3.167455E-04 |
| 25   | H16   | 3.328469E-04  | 1.496603E-04  | 2.129530E-04  |
| 26   | H17   | 3.554518E-04  | 1.287242E-04  | -1.716810E-04 |
| 27   | H18   | 1.486137E-03  | 2.577115E-04  | 2.009026E-04  |
| 28   | H19   | 1.714175E-05  | 8.756748E-05  | -1.598401E-04 |
| 29   | H20   | 3.361176E-05  | 4.889786E-05  | -2.258726E-04 |
| 30   | C1    | -2.352300E-04 | 1.325569E-04  | 1.607766E-04  |
| 31   | H5    | -2.663504E-05 | 8.592286E-06  | 1.148176E-04  |
| 32   | H6    | -4.109229E-05 | 8.430998E-05  | 1.882357E-04  |
| 33   | C3    | -4.420181E-04 | -1.741977E-04 | -2.983395E-04 |
| 34   | C26   | -2.316693E-04 | -2.309980E-04 | -1.002232E-04 |
| 35   | C27   | -8.113392E-05 | -3.491728E-05 | -1.261326E-04 |
| 36   | C28   | 2.378795E-04  | 1.576131E-04  | 7.887497E-05  |
| 37   | C29   | 1.155601E-04  | 5.628839E-05  | 2.498595E-04  |
| 38   | H1    | -1.391838E-04 | -3.540240E-05 | 1.268414E-04  |
| 39   | H2    | 6.131107E-05  | 1.420514E-04  | 1.187152E-04  |

|       |       |               |               |               |
|-------|-------|---------------|---------------|---------------|
| 40    | H3    | 5.722184E-05  | 1.176396E-04  | -1.489399E-04 |
| 41    | H9    | -1.997639E-04 | -2.093410E-04 | -2.637846E-04 |
| 42    | H10   | 2.310080E-04  | 2.058152E-04  | -3.046466E-04 |
| 43    | H25   | -5.723237E-05 | 6.307406E-05  | -1.828532E-05 |
| ----- |       |               |               |               |
|       | total | 6.569597E-04  | 8.467135E-04  | 2.658720E-05  |

end of program derlb

start of program geopt 14

geometry optimization step 14

reading input hessian of dimension 129  
in five columns format  
reading input hessian of dimension 129  
in five columns format  
reading input hessian of dimension 129  
in five columns format

Level shifts adjusted to satisfy step-size constraints

Step size: 0.0108550

Cos(theta): 0.7082419

Final level shift: -3.0472439E-02

energy change: -7.4265E-06 \* ( 5.0000E-05 )  
gradient maximum: 1.4699E-03 . ( 4.5000E-04 )  
gradient rms: 2.7737E-04 \* ( 3.0000E-04 )  
step size: 0.01085 trust radius: 0.01000  
displacement maximum: 4.5549E-03 . ( 1.8000E-03 )  
displacement rms: 8.5285E-04 \* ( 1.2000E-03 )  
predicted energy change: -1.5366E-05 geom step: 1.0855E-02  
full step: 1.0855E-02  
molecular structure not yet converged...

center of mass moved by:

x: 2.3234E-04 y: -3.9719E-04 z: 1.1836E-04

new geometry:

|      | angstroms     |               |               |
|------|---------------|---------------|---------------|
| atom | x             | y             | z             |
| N1   | -0.2476098628 | 0.4319499494  | 1.1700896461  |
| N2   | -1.0050850757 | -2.2950871682 | 1.1949182325  |
| C4   | -1.2225555532 | -0.0359392069 | 1.9934979632  |
| C5   | -0.0345337388 | -1.9145591457 | 0.4863206158  |
| C6   | -1.6345629750 | -1.3576518558 | 2.0372932256  |
| C7   | -1.7207638142 | 0.9827487410  | 2.7857085019  |
| C13  | 0.6372167911  | -2.9214974519 | -0.4226269266 |
| H4   | -2.9991767135 | -2.6746254046 | 2.9867461727  |
| C8   | -2.7544283972 | 0.6541992122  | 3.6802520196  |



|     |               |               |               |
|-----|---------------|---------------|---------------|
| C11 | -0.9547075557 | 2.1487129569  | 2.4185234965  |
| H7  | -3.1936858699 | 1.4000793918  | 4.3191782963  |
| C9  | -3.1953417522 | -0.6499826706 | 3.7301011813  |
| H8  | -3.9846205275 | -0.9126483273 | 4.4122075724  |
| C10 | -2.6412076664 | -1.6632555907 | 2.9184523073  |
| C12 | -0.0714118196 | 1.7763193928  | 1.4539254438  |
| C2  | 0.9267126827  | 2.6085697080  | 0.7475086448  |
| H13 | 1.7145636018  | -2.8715088035 | -0.2838423517 |
| C14 | 0.3089199593  | -2.7020981095 | -1.8909152593 |
| H15 | 0.3081077662  | -3.9039526830 | -0.1083403583 |
| C15 | -0.3215924809 | -2.3201267580 | -4.5836616469 |
| C16 | 1.3004540244  | -2.3992437756 | -2.8137797881 |
| C17 | -1.0077278059 | -2.8118948597 | -2.3339058106 |
| C18 | -1.3203617236 | -2.6227459376 | -3.6680394462 |
| C19 | 0.9888784831  | -2.2093360982 | -4.1534576988 |
| H16 | 2.3240667900  | -2.3146888619 | -2.4895233992 |
| H17 | -1.7849137076 | -3.0449393883 | -1.6268919447 |
| H18 | -2.3419771432 | -2.7122708466 | -3.9947783125 |
| H19 | 1.7707403444  | -1.9764961643 | -4.8551652860 |
| H20 | -0.5656277175 | -2.1736956496 | -5.6211053749 |
| C1  | 0.5760456600  | -0.5105838268 | 0.4433549677  |
| H5  | 1.5800429573  | -0.5626136306 | 0.8641513090  |
| H6  | 0.6825437933  | -0.2189447287 | -0.5941242795 |
| C3  | 2.7951744578  | 4.2145617192  | -0.5601377830 |
| C26 | 1.8187572576  | 3.3915699332  | 1.4744469707  |
| C27 | 0.9785171969  | 2.6447421378  | -0.6446715605 |
| C28 | 1.9082206454  | 3.4396720163  | -1.2930044553 |
| C29 | 2.7448249516  | 4.1917280945  | 0.8244421729  |
| H1  | 1.7902754511  | 3.3610162274  | 2.5486052296  |
| H2  | 0.2747696491  | 2.0686681731  | -1.2192937084 |
| H3  | 1.9337718424  | 3.4605773143  | -2.3682340620 |
| H9  | 3.4301063300  | 4.7894624992  | 1.3997519889  |
| H10 | 3.5171655374  | 4.8322369654  | -1.0645143063 |
| H25 | -1.0688078963 | 3.1463685995  | 2.7914697600  |

nuclear repulsion energy..... 1971.109269844 hartrees

/ end of geometry optimization iteration 14 /

end of program geopt

start of program onee

smallest eigenvalue of S: 2.820E-04

number of canonical orbitals..... 461

end of program onee

start of program probe

end of program probe

start of program grid

number of gridpoints:

| atom     | N1  | N2  | C4  | C5  | C6  | C7  | C13 |
|----------|-----|-----|-----|-----|-----|-----|-----|
| H4       |     |     |     |     |     |     |     |
| grid # 1 | 96  | 102 | 87  | 87  | 90  | 90  | 84  |
| 73       |     |     |     |     |     |     |     |
| grid # 2 | 103 | 112 | 95  | 95  | 99  | 98  | 92  |
| 118      |     |     |     |     |     |     |     |
| grid # 3 | 214 | 227 | 195 | 187 | 191 | 199 | 163 |
| 224      |     |     |     |     |     |     |     |
| grid # 4 | 389 | 414 | 322 | 320 | 323 | 347 | 299 |
| 224      |     |     |     |     |     |     |     |

number of gridpoints:

| atom     | C8  | C11 | H7  | C9  | H8  | C10 | C12 |
|----------|-----|-----|-----|-----|-----|-----|-----|
| C2       |     |     |     |     |     |     |     |
| grid # 1 | 89  | 86  | 73  | 87  | 73  | 89  | 86  |
| 92       |     |     |     |     |     |     |     |
| grid # 2 | 97  | 94  | 118 | 97  | 118 | 97  | 94  |
| 100      |     |     |     |     |     |     |     |
| grid # 3 | 184 | 185 | 223 | 184 | 222 | 184 | 194 |
| 195      |     |     |     |     |     |     |     |
| grid # 4 | 329 | 331 | 226 | 331 | 223 | 329 | 317 |
| 341      |     |     |     |     |     |     |     |

number of gridpoints:

| atom     | H13 | C14 | H15 | C15 | C16 | C17 | C18 |
|----------|-----|-----|-----|-----|-----|-----|-----|
| C19      |     |     |     |     |     |     |     |
| grid # 1 | 69  | 91  | 69  | 89  | 88  | 88  | 89  |
| 89       |     |     |     |     |     |     |     |
| grid # 2 | 110 | 100 | 110 | 97  | 96  | 96  | 97  |
| 96       |     |     |     |     |     |     |     |
| grid # 3 | 211 | 197 | 214 | 183 | 184 | 183 | 184 |
| 183      |     |     |     |     |     |     |     |
| grid # 4 | 214 | 340 | 213 | 327 | 327 | 327 | 327 |
| 327      |     |     |     |     |     |     |     |

number of gridpoints:

| atom     | H16 | H17 | H18 | H19 | H20 | C1  | H5  |
|----------|-----|-----|-----|-----|-----|-----|-----|
| H6       |     |     |     |     |     |     |     |
| grid # 1 | 72  | 73  | 73  | 73  | 73  | 82  | 70  |
| 69       |     |     |     |     |     |     |     |
| grid # 2 | 114 | 115 | 118 | 118 | 118 | 88  | 110 |
| 104      |     |     |     |     |     |     |     |
| grid # 3 | 214 | 216 | 223 | 222 | 224 | 164 | 217 |
| 207      |     |     |     |     |     |     |     |
| grid # 4 | 214 | 214 | 224 | 223 | 224 | 293 | 217 |
| 205      |     |     |     |     |     |     |     |

number of gridpoints:

|     |          |     |     |     |     |     |     |     |
|-----|----------|-----|-----|-----|-----|-----|-----|-----|
|     | atom     | C3  | C26 | C27 | C28 | C29 | H1  | H2  |
| H3  |          |     |     |     |     |     |     |     |
|     | grid # 1 | 89  | 88  | 88  | 89  | 89  | 72  | 71  |
| 73  |          |     |     |     |     |     |     |     |
|     | grid # 2 | 97  | 95  | 96  | 97  | 97  | 115 | 114 |
| 118 |          |     |     |     |     |     |     |     |
|     | grid # 3 | 185 | 182 | 184 | 185 | 185 | 217 | 213 |
| 223 |          |     |     |     |     |     |     |     |
|     | grid # 4 | 328 | 328 | 329 | 328 | 328 | 217 | 212 |
| 224 |          |     |     |     |     |     |     |     |

number of gridpoints:

|          |     |     |     |       |
|----------|-----|-----|-----|-------|
| atom     | H9  | H10 | H25 | total |
| grid # 1 | 73  | 73  | 72  | 3518  |
| grid # 2 | 118 | 118 | 115 | 4494  |
| grid # 3 | 223 | 224 | 220 | 8638  |
| grid # 4 | 224 | 224 | 224 | 12247 |

end of program grid

start of program rwr  
end of program rwr

start of program scf

|      | i | u | d | i | g |                  |          | RMS     | maximum |
|------|---|---|---|---|---|------------------|----------|---------|---------|
|      | t | p | i | c | r |                  |          | density | DIIS    |
|      | e | d | i | u | i |                  | energy   | change  | error   |
|      | r | t | s | t | d | total energy     | change   |         |         |
| etot | 1 | N | N | 1 | U | -990.39080246980 |          | 1.4E-05 | 9.2E-04 |
| etot | 2 | Y | Y | 4 | M | -990.39085334491 | 5.1E-05  | 6.4E-06 | 3.6E-04 |
| etot | 3 | Y | Y | 4 | M | -990.39085990967 | 6.6E-06  | 2.0E-06 | 9.6E-05 |
| etot | 4 | Y | N | 4 | M | -990.39085924579 | -6.6E-07 | 0.0E+00 | 0.0E+00 |

Energy components, in hartrees:

|     |                               |                   |       |
|-----|-------------------------------|-------------------|-------|
| (A) | Nuclear repulsion.....        | 1971.10926984366  |       |
| (E) | Total one-electron terms..... | -5260.48968808571 |       |
| (I) | Total two-electron terms..... | 2298.98955899626  |       |
| (L) | Electronic energy.....        | -2961.50012908945 | (E+I) |
| (N) | Total energy.....             | -990.39085924579  | (A+L) |

SCFE: SCF energy: HF -990.39085924579 hartrees iterations:  
4

HOMO energy: -0.26901  
LUMO energy: 0.09668

Orbital energies:

|           |           |           |           |           |           |
|-----------|-----------|-----------|-----------|-----------|-----------|
| -15.60463 | -15.56524 | -11.29626 | -11.28681 | -11.27141 | -11.25098 |
| -11.25089 | -11.24604 | -11.24583 | -11.23989 | -11.23981 | -11.23902 |
| -11.23846 | -11.23783 | -11.23708 | -11.23595 | -11.23451 | -11.23447 |
| -11.23271 | -11.23045 | -11.22455 | -11.22026 | -11.21879 | -11.21610 |
| -11.21302 | -1.32494  | -1.24990  | -1.16327  | -1.16057  | -1.13849  |
| -1.07446  | -1.06705  | -1.03929  | -1.02190  | -1.01890  | -1.01702  |
| -0.97103  | -0.95434  | -0.93367  | -0.86016  | -0.83696  | -0.83361  |
| -0.82905  | -0.80707  | -0.79550  | -0.76999  | -0.73262  | -0.71741  |
| -0.70112  | -0.69838  | -0.66629  | -0.65789  | -0.64288  | -0.63712  |
| -0.63384  | -0.62367  | -0.62072  | -0.61582  | -0.59621  | -0.59233  |
| -0.59050  | -0.58743  | -0.57834  | -0.55809  | -0.55227  | -0.54820  |
| -0.54435  | -0.51743  | -0.50724  | -0.50258  | -0.50021  | -0.49593  |
| -0.49348  | -0.49117  | -0.48739  | -0.48119  | -0.42972  | -0.40488  |
| -0.36749  | -0.34336  | -0.34123  | -0.33760  | -0.32929  | -0.28245  |
| -0.26901  | 0.09668   | 0.12894   | 0.13711   | 0.13740   | 0.14856   |
| 0.17846   | 0.20869   | 0.22827   | 0.23519   | 0.24116   |           |

end of program scf

start of program derla

end of program derla

start of program rwr

end of program rwr

start of program derlb

forces (hartrees/bohr) : total

| atom | label | x             | y             | z             |
|------|-------|---------------|---------------|---------------|
| 1    | N1    | 3.594168E-04  | -3.247900E-04 | -4.707368E-04 |
| 2    | N2    | 1.456478E-04  | 1.299541E-04  | -1.590589E-04 |
| 3    | C4    | 1.259234E-04  | -1.305667E-04 | -7.187211E-05 |
| 4    | C5    | -3.678037E-05 | -4.521296E-05 | 1.199478E-04  |
| 5    | C6    | 5.984738E-05  | -1.658855E-04 | -5.162803E-05 |
| 6    | C7    | -6.725914E-05 | 2.139092E-04  | 6.314595E-05  |
| 7    | C13   | -3.445068E-05 | 1.086910E-04  | 1.095968E-04  |
| 8    | H4    | 1.233470E-05  | -3.123613E-05 | 3.656539E-05  |
| 9    | C8    | -2.053567E-05 | 3.892458E-05  | 6.619510E-05  |
| 10   | C11   | -3.836909E-05 | 2.069748E-04  | 1.279422E-04  |
| 11   | H7    | -2.571961E-06 | 9.001533E-05  | 2.737180E-05  |
| 12   | C9    | 4.406467E-05  | -4.942249E-05 | -3.711664E-05 |
| 13   | H8    | -1.489958E-05 | 3.325105E-06  | 5.832352E-05  |
| 14   | C10   | -2.354330E-05 | 2.627673E-05  | 4.444407E-05  |
| 15   | C12   | 1.173535E-04  | 8.037980E-05  | -1.135315E-05 |
| 16   | C2    | 3.023010E-05  | 1.143481E-04  | 1.144053E-04  |
| 17   | H13   | 4.746262E-05  | 8.375568E-05  | 4.709878E-06  |

|       |       |               |               |               |
|-------|-------|---------------|---------------|---------------|
| 18    | C14   | -2.570906E-04 | -7.682341E-05 | 2.962546E-05  |
| 19    | H15   | 4.472624E-05  | -6.375860E-05 | -2.023663E-05 |
| 20    | C15   | 1.891440E-04  | 6.801696E-05  | -1.397037E-04 |
| 21    | C16   | 8.780006E-05  | 7.855990E-05  | -3.361955E-05 |
| 22    | C17   | 7.344717E-05  | -2.688328E-05 | 3.500123E-04  |
| 23    | C18   | -2.375303E-04 | -1.002662E-04 | -2.346247E-05 |
| 24    | C19   | 3.475516E-05  | 4.269829E-05  | -7.942340E-05 |
| 25    | H16   | -1.546063E-05 | -3.301204E-05 | -2.106096E-05 |
| 26    | H17   | 6.240769E-05  | 4.272218E-05  | 5.193411E-05  |
| 27    | H18   | 2.079249E-04  | 6.398798E-05  | 5.979060E-05  |
| 28    | H19   | -1.512320E-05 | -2.486948E-05 | -5.670209E-05 |
| 29    | H20   | 3.073742E-05  | 1.633282E-05  | -8.591535E-05 |
| 30    | C1    | -1.156034E-04 | 1.492051E-04  | 1.091582E-04  |
| 31    | H5    | -1.311443E-04 | 5.783864E-05  | 4.118251E-05  |
| 32    | H6    | 4.583649E-05  | 3.741885E-05  | 1.991567E-04  |
| 33    | C3    | -1.431507E-04 | -3.099268E-05 | -1.181485E-04 |
| 34    | C26   | 4.632667E-05  | 6.386637E-05  | -1.655493E-04 |
| 35    | C27   | 1.736270E-05  | 4.420336E-05  | -2.361738E-04 |
| 36    | C28   | 3.924001E-05  | 3.200689E-05  | 1.369748E-04  |
| 37    | C29   | 1.549265E-05  | 1.514235E-05  | 4.802569E-05  |
| 38    | H1    | -3.310335E-05 | 2.030411E-05  | 1.784773E-04  |
| 39    | H2    | 9.751055E-05  | 8.306954E-05  | 8.534773E-05  |
| 40    | H3    | 2.527376E-05  | 2.668486E-05  | -9.347572E-05 |
| 41    | H9    | -9.749903E-05 | -4.736787E-05 | -9.930280E-05 |
| 42    | H10   | -2.819321E-06 | 2.249804E-05  | -7.816079E-05 |
| 43    | H25   | -1.728472E-05 | 5.798267E-05  | 1.449746E-05  |
| ----- |       |               |               |               |
|       | total | 6.560473E-04  | 8.680061E-04  | 2.412989E-05  |

end of program der1b

start of program geopt 15

geometry optimization step 15

reading input hessian of dimension 129

in five columns format

reading input hessian of dimension 129

in five columns format

Level shifts adjusted to satisfy step-size constraints

Step size: 0.0143612

Cos(theta): 0.4919231

Final level shift: -2.7000810E-02

energy change: -1.0263E-05 \* ( 5.0000E-05 )

gradient maximum: 4.0569E-04 \* ( 4.5000E-04 )

gradient rms: 1.0457E-04 \* ( 3.0000E-04 )

step size: 0.01436 trust radius: 0.01414

displacement maximum: 8.4903E-03 . ( 1.8000E-03 )

displacement rms: 1.1283E-03 \* ( 1.2000E-03 )  
 predicted energy change: -7.4859E-06 geom step: 1.4361E-  
 02 full step: 1.4361E-02  
 molecular structure not yet converged...

center of mass moved by:  
 x: 2.6501E-05 y: -2.4923E-04 z: 6.1267E-05

new geometry:

|      | angstroms     |               |               |
|------|---------------|---------------|---------------|
| atom | x             | y             | z             |
| N1   | -0.2463607370 | 0.4314193906  | 1.1710338958  |
| N2   | -1.0035424221 | -2.2955233045 | 1.1947806590  |
| C4   | -1.2216235933 | -0.0368540479 | 1.9940347638  |
| C5   | -0.0326064789 | -1.9145180546 | 0.4866450499  |
| C6   | -1.6331040260 | -1.3588415492 | 2.0376289344  |
| C7   | -1.7214275643 | 0.9821252034  | 2.7857401080  |
| C13  | 0.6387952323  | -2.9207111820 | -0.4230303496 |
| H4   | -2.9983933254 | -2.6759482577 | 2.9865390107  |
| C8   | -2.7554322781 | 0.6531437848  | 3.6795071530  |
| C11  | -0.9556687926 | 2.1484771315  | 2.4194464699  |
| H7   | -3.1957362911 | 1.3993275357  | 4.3177668929  |
| C9   | -3.1954005477 | -0.6509580953 | 3.7294178623  |
| H8   | -3.9851392350 | -0.9139827639 | 4.4112945459  |
| C10  | -2.6402354285 | -1.6642884757 | 2.9184542048  |
| C12  | -0.0716231059 | 1.7762215315  | 1.4549835704  |
| C2   | 0.9257296648  | 2.6089482628  | 0.7484190091  |
| H13  | 1.7160363204  | -2.8699892414 | -0.2843745120 |
| C14  | 0.3092857777  | -2.7015111760 | -1.8910420198 |
| H15  | 0.3107659365  | -3.9038972276 | -0.1098048464 |
| C15  | -0.3210182211 | -2.3198001555 | -4.5845563047 |
| C16  | 1.3026267989  | -2.4078132613 | -2.8158087619 |
| C17  | -1.0093417649 | -2.8017601438 | -2.3324540938 |
| C18  | -1.3215507168 | -2.6128445964 | -3.6669555125 |
| C19  | 0.9912426335  | -2.2182211833 | -4.1556558124 |
| H16  | 2.3277109198  | -2.3309831513 | -2.4925549566 |
| H17  | -1.7872243266 | -3.0262248434 | -1.6238607485 |
| H18  | -2.3426567575 | -2.6932803270 | -3.9926346211 |
| H19  | 1.7741739528  | -1.9932912445 | -4.8591528825 |
| H20  | -0.5645529054 | -2.1734405864 | -5.6223463359 |
| C1   | 0.5782555737  | -0.5107568800 | 0.4460053859  |
| H5   | 1.5811573473  | -0.5631828239 | 0.8704649311  |
| H6   | 0.6880840404  | -0.2177615274 | -0.5909622482 |
| C3   | 2.7922215595  | 4.2150771119  | -0.5617697159 |
| C26  | 1.8178585798  | 3.3922403513  | 1.4746958238  |
| C27  | 0.9762379671  | 2.6449102789  | -0.6443115909 |
| C28  | 1.9050145102  | 3.4399273512  | -1.2938231691 |
| C29  | 2.7430458157  | 4.1923393067  | 0.8232302794  |
| H1   | 1.7893807507  | 3.3619023049  | 2.5491513072  |
| H2   | 0.2718921784  | 2.0685313456  | -1.2175644237 |
| H3   | 1.9300026211  | 3.4609305987  | -2.3692287604 |
| H9   | 3.4287854490  | 4.7902046058  | 1.3973483110  |

|     |               |              |               |
|-----|---------------|--------------|---------------|
| H10 | 3.5140165769  | 4.8329081285 | -1.0672737690 |
| H25 | -1.0711083010 | 3.1462171349 | 2.7921150838  |

nuclear repulsion energy..... 1971.034696625 hartrees

-----  
/ end of geometry optimization iteration 15 /  
-----

end of program geopt

start of program onee  
smallest eigenvalue of S: 2.821E-04  
number of canonical orbitals..... 461  
end of program onee

start of program probe  
end of program probe

start of program grid

number of gridpoints:

|          | atom | N1  | N2  | C4  | C5  | C6  | C7  | C13 |
|----------|------|-----|-----|-----|-----|-----|-----|-----|
| H4       |      |     |     |     |     |     |     |     |
| grid # 1 |      | 96  | 102 | 87  | 87  | 90  | 89  | 84  |
| 73       |      |     |     |     |     |     |     |     |
| grid # 2 |      | 103 | 112 | 95  | 95  | 99  | 98  | 92  |
| 118      |      |     |     |     |     |     |     |     |
| grid # 3 |      | 214 | 227 | 195 | 187 | 191 | 199 | 163 |
| 224      |      |     |     |     |     |     |     |     |
| grid # 4 |      | 388 | 414 | 321 | 320 | 322 | 348 | 299 |
| 224      |      |     |     |     |     |     |     |     |

number of gridpoints:

|          | atom | C8  | C11 | H7  | C9  | H8  | C10 | C12 |
|----------|------|-----|-----|-----|-----|-----|-----|-----|
| C2       |      |     |     |     |     |     |     |     |
| grid # 1 |      | 89  | 86  | 73  | 87  | 73  | 89  | 86  |
| 92       |      |     |     |     |     |     |     |     |
| grid # 2 |      | 97  | 94  | 118 | 97  | 118 | 97  | 94  |
| 100      |      |     |     |     |     |     |     |     |
| grid # 3 |      | 184 | 185 | 223 | 184 | 222 | 184 | 194 |
| 195      |      |     |     |     |     |     |     |     |
| grid # 4 |      | 328 | 331 | 226 | 331 | 223 | 329 | 317 |
| 343      |      |     |     |     |     |     |     |     |

number of gridpoints:

|          | atom | H13 | C14 | H15 | C15 | C16 | C17 | C18 |
|----------|------|-----|-----|-----|-----|-----|-----|-----|
| C19      |      |     |     |     |     |     |     |     |
| grid # 1 |      | 69  | 91  | 69  | 89  | 88  | 88  | 89  |
| 89       |      |     |     |     |     |     |     |     |

|          |     |     |     |    |    |    |    |
|----------|-----|-----|-----|----|----|----|----|
| grid # 2 | 109 | 100 | 110 | 97 | 96 | 96 | 97 |
|----------|-----|-----|-----|----|----|----|----|

96

|          |     |     |     |     |     |     |     |
|----------|-----|-----|-----|-----|-----|-----|-----|
| grid # 3 | 210 | 196 | 214 | 183 | 184 | 183 | 184 |
|----------|-----|-----|-----|-----|-----|-----|-----|

183

|          |     |     |     |     |     |     |     |
|----------|-----|-----|-----|-----|-----|-----|-----|
| grid # 4 | 214 | 340 | 213 | 327 | 327 | 327 | 327 |
|----------|-----|-----|-----|-----|-----|-----|-----|

327

number of gridpoints:

|      |     |     |     |     |     |    |    |
|------|-----|-----|-----|-----|-----|----|----|
| atom | H16 | H17 | H18 | H19 | H20 | C1 | H5 |
|------|-----|-----|-----|-----|-----|----|----|

H6

|          |    |    |    |    |    |    |    |
|----------|----|----|----|----|----|----|----|
| grid # 1 | 72 | 73 | 73 | 73 | 73 | 82 | 70 |
|----------|----|----|----|----|----|----|----|

69

|          |     |     |     |     |     |    |     |
|----------|-----|-----|-----|-----|-----|----|-----|
| grid # 2 | 114 | 115 | 118 | 118 | 118 | 88 | 109 |
|----------|-----|-----|-----|-----|-----|----|-----|

104

|          |     |     |     |     |     |     |     |
|----------|-----|-----|-----|-----|-----|-----|-----|
| grid # 3 | 214 | 216 | 222 | 222 | 224 | 164 | 217 |
|----------|-----|-----|-----|-----|-----|-----|-----|

207

|          |     |     |     |     |     |     |     |
|----------|-----|-----|-----|-----|-----|-----|-----|
| grid # 4 | 214 | 214 | 224 | 223 | 224 | 293 | 219 |
|----------|-----|-----|-----|-----|-----|-----|-----|

205

number of gridpoints:

|      |    |     |     |     |     |    |    |
|------|----|-----|-----|-----|-----|----|----|
| atom | C3 | C26 | C27 | C28 | C29 | H1 | H2 |
|------|----|-----|-----|-----|-----|----|----|

H3

|          |    |    |    |    |    |    |    |
|----------|----|----|----|----|----|----|----|
| grid # 1 | 89 | 88 | 88 | 89 | 89 | 72 | 71 |
|----------|----|----|----|----|----|----|----|

73

|          |    |    |    |    |    |     |     |
|----------|----|----|----|----|----|-----|-----|
| grid # 2 | 97 | 95 | 96 | 97 | 97 | 115 | 114 |
|----------|----|----|----|----|----|-----|-----|

118

|          |     |     |     |     |     |     |     |
|----------|-----|-----|-----|-----|-----|-----|-----|
| grid # 3 | 185 | 182 | 183 | 185 | 185 | 217 | 213 |
|----------|-----|-----|-----|-----|-----|-----|-----|

223

|          |     |     |     |     |     |     |     |
|----------|-----|-----|-----|-----|-----|-----|-----|
| grid # 4 | 328 | 327 | 329 | 327 | 328 | 217 | 212 |
|----------|-----|-----|-----|-----|-----|-----|-----|

224

number of gridpoints:

|      |    |     |     |       |
|------|----|-----|-----|-------|
| atom | H9 | H10 | H25 | total |
|------|----|-----|-----|-------|

|          |     |     |     |       |
|----------|-----|-----|-----|-------|
| grid # 1 | 73  | 73  | 72  | 3517  |
| grid # 2 | 118 | 118 | 115 | 4492  |
| grid # 3 | 222 | 224 | 220 | 8633  |
| grid # 4 | 224 | 224 | 224 | 12246 |

end of program grid

start of program rwr  
end of program rwr

start of program scf

|   |   |   |   |   |              |               |                                          |
|---|---|---|---|---|--------------|---------------|------------------------------------------|
| i | u | d | i | g |              |               |                                          |
| t | p | i | c | r |              |               |                                          |
| e | d | i | u | i |              |               |                                          |
| r | t | s | t | d | total energy | energy change | RMS density change<br>maximum DIIS error |



|      |   |   |   |   |   |                  |         |         |         |
|------|---|---|---|---|---|------------------|---------|---------|---------|
| etot | 1 | N | N | 1 | U | -990.39072743546 |         | 2.7E-05 | 1.6E-03 |
| etot | 2 | Y | Y | 4 | M | -990.39084046479 | 1.1E-04 | 1.0E-05 | 6.3E-04 |
| etot | 3 | Y | Y | 4 | M | -990.39085660547 | 1.6E-05 | 2.9E-06 | 1.5E-04 |
| etot | 4 | Y | N | 4 | M | -990.39085842189 | 1.8E-06 | 0.0E+00 | 0.0E+00 |

Energy components, in hartrees:

|     |                               |                   |       |
|-----|-------------------------------|-------------------|-------|
| (A) | Nuclear repulsion.....        | 1971.03469662474  |       |
| (E) | Total one-electron terms..... | -5260.33898399291 |       |
| (I) | Total two-electron terms..... | 2298.91342894628  |       |
| (L) | Electronic energy.....        | -2961.42555504663 | (E+I) |
| (N) | Total energy.....             | -990.39085842189  | (A+L) |

SCFE: SCF energy: HF      -990.39085842189 hartrees      iterations:  
4

HOMO energy:      -0.26904  
LUMO energy:      0.09663

Orbital energies:

|           |           |           |           |           |           |
|-----------|-----------|-----------|-----------|-----------|-----------|
| -15.60476 | -15.56511 | -11.29628 | -11.28688 | -11.27173 | -11.25112 |
| -11.25088 | -11.24616 | -11.24601 | -11.23993 | -11.23979 | -11.23905 |
| -11.23848 | -11.23784 | -11.23711 | -11.23607 | -11.23466 | -11.23444 |
| -11.23292 | -11.23053 | -11.22458 | -11.22023 | -11.21899 | -11.21606 |
| -11.21326 | -1.32501  | -1.24984  | -1.16321  | -1.16033  | -1.13852  |
| -1.07453  | -1.06701  | -1.03926  | -1.02190  | -1.01887  | -1.01693  |
| -0.97093  | -0.95430  | -0.93367  | -0.86015  | -0.83703  | -0.83361  |
| -0.82898  | -0.80705  | -0.79545  | -0.77000  | -0.73261  | -0.71741  |
| -0.70108  | -0.69829  | -0.66635  | -0.65790  | -0.64282  | -0.63719  |
| -0.63386  | -0.62365  | -0.62070  | -0.61581  | -0.59629  | -0.59238  |
| -0.59044  | -0.58747  | -0.57825  | -0.55807  | -0.55220  | -0.54819  |
| -0.54450  | -0.51739  | -0.50722  | -0.50256  | -0.50019  | -0.49584  |
| -0.49341  | -0.49117  | -0.48733  | -0.48121  | -0.42975  | -0.40483  |
| -0.36754  | -0.34337  | -0.34122  | -0.33756  | -0.32914  | -0.28243  |
| -0.26904  | 0.09663   | 0.12889   | 0.13707   | 0.13733   | 0.14845   |
| 0.17836   | 0.20861   | 0.22838   | 0.23520   | 0.24116   |           |

end of program scf

start of program der1a  
end of program der1a

start of program rwr  
end of program rwr

start of program der1b

forces (hartrees/bohr) : total

| atom  | label | x             | y             | z             |
|-------|-------|---------------|---------------|---------------|
| 1     | N1    | -2.481303E-04 | 2.161363E-04  | 3.038174E-05  |
| 2     | N2    | 2.836382E-04  | -2.499438E-05 | -2.728610E-04 |
| 3     | C4    | -5.332666E-05 | 1.576006E-04  | 1.308833E-04  |
| 4     | C5    | -3.595149E-04 | -1.387013E-04 | 2.963041E-04  |
| 5     | C6    | 2.019594E-05  | 1.908855E-04  | 2.396059E-05  |
| 6     | C7    | 2.466402E-04  | -1.423657E-04 | -1.552636E-04 |
| 7     | C13   | -1.276988E-04 | 5.612039E-06  | 6.448695E-05  |
| 8     | H4    | 8.439654E-05  | 1.557089E-04  | 3.881350E-05  |
| 9     | C8    | 1.165608E-05  | 5.058858E-04  | 1.509718E-04  |
| 10    | C11   | 1.471085E-04  | -4.822498E-05 | -3.124871E-04 |
| 11    | H7    | 5.901722E-05  | -5.856555E-05 | -6.083047E-05 |
| 12    | C9    | -2.081620E-04 | -4.628287E-04 | 1.114154E-04  |
| 13    | H8    | 1.113241E-04  | 3.132659E-05  | -7.909427E-05 |
| 14    | C10   | -1.274255E-04 | -2.859290E-04 | 1.870702E-05  |
| 15    | C12   | -5.235787E-06 | 8.359514E-05  | 2.010785E-04  |
| 16    | C2    | 2.011226E-05  | 1.154169E-04  | -3.679946E-04 |
| 17    | H13   | 1.231949E-04  | 6.717329E-05  | -9.936772E-05 |
| 18    | C14   | -2.239323E-04 | 1.957682E-04  | -5.369846E-04 |
| 19    | H15   | 3.610993E-06  | -2.367943E-05 | 1.405502E-04  |
| 20    | C15   | 4.528455E-04  | 8.163430E-06  | 3.393146E-04  |
| 21    | C16   | -5.301138E-05 | -4.748777E-05 | 2.288187E-04  |
| 22    | C17   | 9.188483E-04  | 1.208919E-04  | 1.826117E-04  |
| 23    | C18   | 1.202191E-03  | 1.978553E-04  | 5.774334E-05  |
| 24    | C19   | -4.165740E-04 | -3.910772E-05 | -2.787547E-04 |
| 25    | H16   | -3.998587E-04 | 2.166071E-05  | -1.106724E-04 |
| 26    | H17   | -1.196398E-04 | -1.085782E-04 | 1.297513E-04  |
| 27    | H18   | -9.010150E-04 | -1.633065E-04 | -2.194062E-04 |
| 28    | H19   | -1.346353E-04 | 2.261628E-05  | 1.123854E-04  |
| 29    | H20   | 4.154382E-06  | -5.819682E-06 | 1.013341E-04  |
| 30    | C1    | 5.219134E-04  | 1.699161E-04  | -4.100770E-06 |
| 31    | H5    | -3.070221E-04 | -1.084423E-05 | -1.892583E-04 |
| 32    | H6    | 6.403176E-05  | -1.027693E-04 | 3.230711E-04  |
| 33    | C3    | 1.449365E-04  | 1.660298E-04  | 1.228439E-04  |
| 34    | C26   | -3.787139E-07 | 5.421162E-05  | -1.973404E-04 |
| 35    | C27   | 1.942710E-05  | 4.496688E-05  | 2.562209E-04  |
| 36    | C28   | -4.419795E-05 | -3.799500E-05 | 5.523642E-05  |
| 37    | C29   | -1.078932E-06 | -5.617927E-06 | -2.284443E-04 |
| 38    | H1    | 8.125850E-05  | 7.200215E-05  | -6.136742E-05 |
| 39    | H2    | 4.595660E-05  | 3.363527E-05  | -2.715897E-05 |
| 40    | H3    | -3.156831E-05 | -9.218442E-06 | 3.647842E-06  |
| 41    | H9    | 3.691536E-05  | 8.898917E-05  | 2.667129E-05  |
| 42    | H10   | -2.160082E-04 | -1.433661E-04 | 1.416099E-04  |
| 43    | H25   | 3.817919E-05  | -4.036847E-05 | -5.326570E-05 |
| total |       | 6.631381E-04  | 8.262798E-04  | 3.416091E-05  |

end of program der1b

start of program geopt 16

geometry optimization step 16

reading input hessian of dimension 129

in five columns format

reading input hessian of dimension 129

in five columns format

\*\* restarting optimization from step 15 \*\*

Level shifts adjusted to satisfy step-size constraints

Step size: 0.0104342

Cos(theta): 0.4965050

Final level shift: -2.6262214E-02

energy change: 8.2390E-07 # ( 5.0000E-05 )

gradient maximum: 4.0569E-04 \* ( 4.5000E-04 )

gradient rms: 1.0457E-04 \* ( 3.0000E-04 )

step size: 0.01043 trust radius: 0.01000

displacement maximum: 6.0223E-03 . ( 1.8000E-03 )

displacement rms: 8.1979E-04 \* ( 1.2000E-03 )

predicted energy change: -4.8790E-06 geom step: 1.0434E-

02 full step: 1.0434E-02

\*\*\*\*\*

\*\* Geometry optimization complete \*\*

\*\*\*\*\*

center of mass moved by:

x: 0.0000E+00

y: -6.8695E-16

z: 3.8858E-16

final geometry:

|      | angstroms     |               |               |
|------|---------------|---------------|---------------|
| atom | x             | y             | z             |
| N1   | -0.2476098628 | 0.4319499494  | 1.1700896461  |
| N2   | -1.0050850757 | -2.2950871682 | 1.1949182325  |
| C4   | -1.2225555532 | -0.0359392069 | 1.9934979632  |
| C5   | -0.0345337388 | -1.9145591457 | 0.4863206158  |
| C6   | -1.6345629750 | -1.3576518558 | 2.0372932256  |
| C7   | -1.7207638142 | 0.9827487410  | 2.7857085019  |
| C13  | 0.6372167911  | -2.9214974519 | -0.4226269266 |
| H4   | -2.9991767135 | -2.6746254046 | 2.9867461727  |
| C8   | -2.7544283972 | 0.6541992122  | 3.6802520196  |
| C11  | -0.9547075557 | 2.1487129569  | 2.4185234965  |
| H7   | -3.1936858699 | 1.4000793918  | 4.3191782963  |
| C9   | -3.1953417522 | -0.6499826706 | 3.7301011813  |
| H8   | -3.9846205275 | -0.9126483273 | 4.4122075724  |
| C10  | -2.6412076664 | -1.6632555907 | 2.9184523073  |
| C12  | -0.0714118196 | 1.7763193928  | 1.4539254438  |
| C2   | 0.9267126827  | 2.6085697080  | 0.7475086448  |
| H13  | 1.7145636018  | -2.8715088035 | -0.2838423517 |

|     |               |               |               |
|-----|---------------|---------------|---------------|
| C14 | 0.3089199593  | -2.7020981095 | -1.8909152593 |
| H15 | 0.3081077662  | -3.9039526830 | -0.1083403583 |
| C15 | -0.3215924809 | -2.3201267580 | -4.5836616469 |
| C16 | 1.3004540244  | -2.3992437756 | -2.8137797881 |
| C17 | -1.0077278059 | -2.8118948597 | -2.3339058106 |
| C18 | -1.3203617236 | -2.6227459376 | -3.6680394462 |
| C19 | 0.9888784831  | -2.2093360982 | -4.1534576988 |
| H16 | 2.3240667900  | -2.3146888619 | -2.4895233992 |
| H17 | -1.7849137076 | -3.0449393883 | -1.6268919447 |
| H18 | -2.3419771432 | -2.7122708466 | -3.9947783125 |
| H19 | 1.7707403444  | -1.9764961643 | -4.8551652860 |
| H20 | -0.5656277175 | -2.1736956496 | -5.6211053749 |
| C1  | 0.5760456600  | -0.5105838268 | 0.4433549677  |
| H5  | 1.5800429573  | -0.5626136306 | 0.8641513090  |
| H6  | 0.6825437933  | -0.2189447287 | -0.5941242795 |
| C3  | 2.7951744578  | 4.2145617192  | -0.5601377830 |
| C26 | 1.8187572576  | 3.3915699332  | 1.4744469707  |
| C27 | 0.9785171969  | 2.6447421378  | -0.6446715605 |
| C28 | 1.9082206454  | 3.4396720163  | -1.2930044553 |
| C29 | 2.7448249516  | 4.1917280945  | 0.8244421729  |
| H1  | 1.7902754511  | 3.3610162274  | 2.5486052296  |
| H2  | 0.2747696491  | 2.0686681731  | -1.2192937084 |
| H3  | 1.9337718424  | 3.4605773143  | -2.3682340620 |
| H9  | 3.4301063300  | 4.7894624992  | 1.3997519889  |
| H10 | 3.5171655374  | 4.8322369654  | -1.0645143063 |
| H25 | -1.0688078963 | 3.1463685995  | 2.7914697600  |

nuclear repulsion energy..... 1971.109269844 hartrees

/ end of geometry optimization iteration 16 /

end of program geopt

start of program post  
 Writing a SPARTAN archive file  
 end of program post

Total cpu seconds      user:      1761.812      user+sys:      1761.812

## Compound 2'a

```
+-----+
---+
| Jaguar version 3.5, release 42
|
|
| Copyright 1991-1998 Schrodinger, Inc.
|
| All Rights Reserved.
|
|
| Use of this program should be acknowledged in publications
as: |
| Jaguar 3.5, Schrodinger, Inc., Portland, Oregon, 1998.
|
+-----+
-----+
```

start of program pre  
Job name: WF3654  
Executables used: D:\TITAN  
Temporary files : C:\Users\gfabr\AppData\Local\Temp\WF3654

Input file comments:  
Molecule001  
This file created by Spartan

basis set: 6-31G\*\*  
net molecular charge: 0  
multiplicity: 1

number of basis functions.... 465

Input geometry:

|      | angstroms     |               |               |
|------|---------------|---------------|---------------|
| atom | x             | y             | z             |
| N1   | -0.1550260000 | 0.4374990000  | 1.1210390000  |
| N2   | -1.0086730000 | -2.3256400000 | 1.1332130000  |
| C4   | -1.1860510000 | -0.0350800000 | 1.9315790000  |
| C5   | -0.0104550000 | -1.9237530000 | 0.4028750000  |
| C6   | -1.6456290000 | -1.3760560000 | 1.9632780000  |
| C7   | -1.7070180000 | 1.0262900000  | 2.7388420000  |
| C13  | 0.7199200000  | -2.8803430000 | -0.5063790000 |
| H4   | -3.1185930000 | -2.6496450000 | 2.9223950000  |
| C8   | -2.7656460000 | 0.7093510000  | 3.5969080000  |
| C11  | -0.9132890000 | 2.1852800000  | 2.3994340000  |
| H7   | -3.2133600000 | 1.4833470000  | 4.2359600000  |
| C9   | -3.2381490000 | -0.5972350000 | 3.6279590000  |

|     |               |               |               |
|-----|---------------|---------------|---------------|
| H8  | -4.0721010000 | -0.8455450000 | 4.3029390000  |
| C10 | -2.7017240000 | -1.6349910000 | 2.8394980000  |
| C12 | 0.0268720000  | 1.8011420000  | 1.4273890000  |
| C2  | 1.0263770000  | 2.6560040000  | 0.8075810000  |
| H13 | 1.8204060000  | -2.6663390000 | -0.4286580000 |
| C14 | 0.2610050000  | -2.7449900000 | -1.9177470000 |
| H15 | 0.5612370000  | -3.9425620000 | -0.1705390000 |
| C15 | -0.5895550000 | -2.5433530000 | -4.5760680000 |
| C16 | 1.1246910000  | -2.2456410000 | -2.8988340000 |
| C17 | -1.0320590000 | -3.1444790000 | -2.2771670000 |
| C18 | -1.4542200000 | -3.0419090000 | -3.6012120000 |
| C19 | 0.6998040000  | -2.1465450000 | -4.2231290000 |
| H16 | 2.1442750000  | -1.9343460000 | -2.6271240000 |
| H17 | -1.7134540000 | -3.5365780000 | -1.5059970000 |
| H18 | -2.4719630000 | -3.3556810000 | -3.8767030000 |
| H19 | 1.3846780000  | -1.7555640000 | -4.9897570000 |
| H20 | -0.9239070000 | -2.4642400000 | -5.6207450000 |
| C1  | 0.5776390000  | -0.5062530000 | 0.3222060000  |
| H5  | 1.6528730000  | -0.5444960000 | 0.6633050000  |
| H6  | 0.5619750000  | -0.1829560000 | -0.7593680000 |
| C3  | 2.9246780000  | 4.3652120000  | -0.3378590000 |
| C26 | 1.7455110000  | 3.5549090000  | 1.6101580000  |
| C27 | 1.2625130000  | 2.6251890000  | -0.5732690000 |
| C28 | 2.2088580000  | 3.4770190000  | -1.1402160000 |
| C29 | 2.6895760000  | 4.4036320000  | 1.0366540000  |
| H1  | 1.5580180000  | 3.5843390000  | 2.6943120000  |
| H2  | 0.6891520000  | 1.9402470000  | -1.2156630000 |
| H3  | 2.3868000000  | 3.4502800000  | -2.2254160000 |
| H9  | 3.2505630000  | 5.1053430000  | 1.6714530000  |
| H10 | 3.6710440000  | 5.0358360000  | -0.7881560000 |
| H25 | -1.0275920000 | 3.1833010000  | 2.8110280000  |

Molecular weight: 322.15 amu

Stoichiometry: C23N2H18

Molecular Point Group: C1

Point Group used: C1

nuclear repulsion energy..... 1952.777623249 hartrees

Non-default options chosen:

Geometry will be optimized in redundant internal coordinates

Initial Hessian: from previous calculation

end of program pre

start of program onee

smallest eigenvalue of S: 3.218E-04

number of canonical orbitals..... 462

end of program onee

start of program hfig  
 initial wavefunction generated automatically from atomic  
 wavefunctions

| Irreducible<br>representation<br>No Symm | Total no<br>orbitals<br>462 | No of occupied orbitals |         |     |
|------------------------------------------|-----------------------------|-------------------------|---------|-----|
|                                          |                             | Shell_1                 | Shell_2 | ... |
| -----                                    |                             | 85                      |         |     |
| Orbital occupation/shell                 |                             | 1.000                   |         |     |

end of program hfig

start of program probe  
 end of program probe

start of program grid

| number of gridpoints: |     |     |     |     |     |     |     |
|-----------------------|-----|-----|-----|-----|-----|-----|-----|
| atom                  | N1  | N2  | C4  | C5  | C6  | C7  | C13 |
| H4                    |     |     |     |     |     |     |     |
| grid # 1              | 97  | 102 | 88  | 88  | 88  | 90  | 84  |
| 73                    |     |     |     |     |     |     |     |
| grid # 2              | 104 | 112 | 97  | 95  | 98  | 98  | 92  |
| 118                   |     |     |     |     |     |     |     |
| grid # 3              | 214 | 229 | 199 | 184 | 197 | 196 | 170 |
| 223                   |     |     |     |     |     |     |     |
| grid # 4              | 391 | 414 | 331 | 322 | 327 | 347 | 304 |
| 232                   |     |     |     |     |     |     |     |

| number of gridpoints: |     |     |     |     |     |     |     |
|-----------------------|-----|-----|-----|-----|-----|-----|-----|
| atom                  | C8  | C11 | H7  | C9  | H8  | C10 | C12 |
| C2                    |     |     |     |     |     |     |     |
| grid # 1              | 89  | 87  | 73  | 87  | 73  | 89  | 86  |
| 90                    |     |     |     |     |     |     |     |
| grid # 2              | 97  | 95  | 118 | 97  | 118 | 97  | 97  |
| 98                    |     |     |     |     |     |     |     |
| grid # 3              | 186 | 182 | 224 | 184 | 222 | 186 | 191 |
| 195                   |     |     |     |     |     |     |     |
| grid # 4              | 332 | 341 | 234 | 329 | 231 | 332 | 331 |
| 341                   |     |     |     |     |     |     |     |

| number of gridpoints: |     |     |     |     |     |     |     |
|-----------------------|-----|-----|-----|-----|-----|-----|-----|
| atom                  | H13 | C14 | H15 | C15 | C16 | C17 | C18 |
| C19                   |     |     |     |     |     |     |     |
| grid # 1              | 69  | 93  | 69  | 89  | 88  | 89  | 89  |
| 89                    |     |     |     |     |     |     |     |
| grid # 2              | 110 | 100 | 112 | 97  | 96  | 96  | 97  |
| 97                    |     |     |     |     |     |     |     |
| grid # 3              | 210 | 195 | 216 | 187 | 186 | 185 | 186 |
| 185                   |     |     |     |     |     |     |     |

|          |     |     |     |     |     |     |     |
|----------|-----|-----|-----|-----|-----|-----|-----|
| grid # 4 | 215 | 342 | 223 | 331 | 330 | 331 | 331 |
|----------|-----|-----|-----|-----|-----|-----|-----|

330

number of gridpoints:

|      |     |     |     |     |     |    |    |
|------|-----|-----|-----|-----|-----|----|----|
| atom | H16 | H17 | H18 | H19 | H20 | C1 | H5 |
|------|-----|-----|-----|-----|-----|----|----|

H6

|          |    |    |    |    |    |    |    |
|----------|----|----|----|----|----|----|----|
| grid # 1 | 72 | 72 | 73 | 73 | 73 | 82 | 70 |
|----------|----|----|----|----|----|----|----|

69

|          |     |     |     |     |     |    |     |
|----------|-----|-----|-----|-----|-----|----|-----|
| grid # 2 | 112 | 114 | 118 | 118 | 118 | 90 | 112 |
|----------|-----|-----|-----|-----|-----|----|-----|

102

|          |     |     |     |     |     |     |     |
|----------|-----|-----|-----|-----|-----|-----|-----|
| grid # 3 | 214 | 217 | 224 | 223 | 224 | 167 | 216 |
|----------|-----|-----|-----|-----|-----|-----|-----|

205

|          |     |     |     |     |     |     |     |
|----------|-----|-----|-----|-----|-----|-----|-----|
| grid # 4 | 221 | 223 | 232 | 231 | 232 | 299 | 217 |
|----------|-----|-----|-----|-----|-----|-----|-----|

206

number of gridpoints:

|      |    |     |     |     |     |    |    |
|------|----|-----|-----|-----|-----|----|----|
| atom | C3 | C26 | C27 | C28 | C29 | H1 | H2 |
|------|----|-----|-----|-----|-----|----|----|

H3

|          |    |    |    |    |    |    |    |
|----------|----|----|----|----|----|----|----|
| grid # 1 | 89 | 89 | 88 | 89 | 89 | 72 | 71 |
|----------|----|----|----|----|----|----|----|

73

|          |    |    |    |    |    |     |     |
|----------|----|----|----|----|----|-----|-----|
| grid # 2 | 97 | 96 | 96 | 97 | 97 | 115 | 111 |
|----------|----|----|----|----|----|-----|-----|

118

|          |     |     |     |     |     |     |     |
|----------|-----|-----|-----|-----|-----|-----|-----|
| grid # 3 | 187 | 184 | 186 | 186 | 186 | 218 | 212 |
|----------|-----|-----|-----|-----|-----|-----|-----|

224

|          |     |     |     |     |     |     |     |
|----------|-----|-----|-----|-----|-----|-----|-----|
| grid # 4 | 332 | 330 | 330 | 329 | 330 | 224 | 217 |
|----------|-----|-----|-----|-----|-----|-----|-----|

232

number of gridpoints:

|      |    |     |     |       |
|------|----|-----|-----|-------|
| atom | H9 | H10 | H25 | total |
|------|----|-----|-----|-------|

|          |    |    |    |      |
|----------|----|----|----|------|
| grid # 1 | 73 | 73 | 72 | 3521 |
|----------|----|----|----|------|

|          |     |     |     |      |
|----------|-----|-----|-----|------|
| grid # 2 | 118 | 118 | 115 | 4498 |
|----------|-----|-----|-----|------|

|          |     |     |     |      |
|----------|-----|-----|-----|------|
| grid # 3 | 224 | 224 | 219 | 8672 |
|----------|-----|-----|-----|------|

|          |     |     |     |       |
|----------|-----|-----|-----|-------|
| grid # 4 | 232 | 232 | 222 | 12443 |
|----------|-----|-----|-----|-------|

end of program grid

start of program rwr

end of program rwr

start of program scf

|                               |     |
|-------------------------------|-----|
| number of electrons.....      | 170 |
| number of alpha electrons.... | 85  |
| number of beta electrons..... | 85  |
| number of orbitals, total.... | 462 |
| number of core orbitals.....  | 85  |
| number of open shell orbs.... | 0   |
| number of occupied orbitals.. | 85  |
| number of virtual orbitals... | 377 |
| number of hamiltonians.....   | 1   |
| number of shells.....         | 1   |



SCF type: HF

|      | i  | u | d | i | g |                  |          | RMS     | maximum |
|------|----|---|---|---|---|------------------|----------|---------|---------|
|      | t  | p | i | c | r |                  |          | density | DIIS    |
|      | e  | d | i | u | i |                  | energy   | change  | error   |
|      | r  | t | s | t | d | total energy     | change   | change  |         |
| etot | 1  | N | N | 5 | M | -987.21080013367 |          | 3.9E-03 | 9.8E-02 |
| etot | 2  | Y | Y | 6 | M | -989.98476104696 | 2.8E+00  | 1.7E-03 | 5.5E-02 |
| etot | 3  | Y | Y | 6 | M | -990.27640419982 | 2.9E-01  | 7.8E-04 | 2.7E-02 |
| etot | 4  | N | Y | 2 | U | -990.34536478481 | 6.9E-02  | 3.8E-04 | 1.5E-02 |
| etot | 5  | Y | Y | 6 | M | -990.35620931742 | 1.1E-02  | 1.0E-03 | 1.0E-02 |
| etot | 6  | N | Y | 2 | U | -990.36578188544 | 9.6E-03  | 1.2E-04 | 2.2E-03 |
| etot | 7  | Y | Y | 6 | M | -990.36633784606 | 5.6E-04  | 4.0E-05 | 5.6E-04 |
| etot | 8  | Y | Y | 6 | M | -990.36641184175 | 7.4E-05  | 1.2E-05 | 2.3E-04 |
| etot | 9  | N | Y | 2 | U | -990.36623705176 | -1.7E-04 | 5.8E-06 | 1.1E-04 |
| etot | 10 | Y | Y | 6 | M | -990.36624305181 | 6.0E-06  | 4.9E-06 | 5.8E-05 |
| etot | 11 | Y | N | 6 | M | -990.36624587679 | 2.8E-06  | 0.0E+00 | 0.0E+00 |

Energy components, in hartrees:

|     |                               |                   |       |
|-----|-------------------------------|-------------------|-------|
| (A) | Nuclear repulsion.....        | 1952.77762324898  |       |
| (E) | Total one-electron terms..... | -5223.87627037117 |       |
| (I) | Total two-electron terms..... | 2280.73240124540  |       |
| (L) | Electronic energy.....        | -2943.14386912577 | (E+I) |
| (N) | Total energy.....             | -990.36624587679  | (A+L) |

SCFE: SCF energy: HF      -990.36624587679 hartrees      iterations:  
11

HOMO energy:      -0.26238  
LUMO energy:      0.08458

Orbital energies:

|           |           |           |           |           |           |
|-----------|-----------|-----------|-----------|-----------|-----------|
| -15.61225 | -15.57394 | -11.30699 | -11.29988 | -11.28257 | -11.26176 |
| -11.25976 | -11.25489 | -11.25065 | -11.24883 | -11.24706 | -11.24570 |
| -11.24527 | -11.24438 | -11.24359 | -11.24267 | -11.24138 | -11.24124 |
| -11.23937 | -11.23733 | -11.22956 | -11.22835 | -11.22767 | -11.22333 |
| -11.22233 | -1.30891  | -1.23521  | -1.15989  | -1.15811  | -1.13132  |
| -1.07044  | -1.06879  | -1.03483  | -1.01840  | -1.01489  | -1.01367  |
| -0.96165  | -0.95090  | -0.92391  | -0.85859  | -0.83575  | -0.83045  |
| -0.82627  | -0.79990  | -0.78600  | -0.76574  | -0.72486  | -0.71505  |
| -0.69233  | -0.69090  | -0.66232  | -0.65281  | -0.64039  | -0.63511  |
| -0.63125  | -0.61793  | -0.61598  | -0.61045  | -0.59401  | -0.58832  |
| -0.58652  | -0.58354  | -0.57683  | -0.55347  | -0.54722  | -0.54082  |
| -0.53565  | -0.51410  | -0.50599  | -0.49981  | -0.49872  | -0.49409  |
| -0.49103  | -0.48832  | -0.48378  | -0.47850  | -0.42632  | -0.40843  |
| -0.36790  | -0.34360  | -0.34155  | -0.33783  | -0.32751  | -0.27573  |
| -0.26238  | 0.08458   | 0.11895   | 0.13358   | 0.13414   | 0.14570   |
| 0.17403   | 0.20148   | 0.21421   | 0.22686   | 0.23450   |           |

end of program scf

start of program derla  
end of program derla

start of program rwr  
recomputing Rwr matrix    2        grid:    4  
end of program rwr

start of program derlb

forces (hartrees/bohr) : total

| atom | label | x             | y             | z             |
|------|-------|---------------|---------------|---------------|
| 1    | N1    | -3.240872E-02 | 9.749688E-03  | 3.179943E-02  |
| 2    | N2    | 3.994841E-02  | 1.589784E-02  | -2.744144E-02 |
| 3    | C4    | -4.648588E-03 | 1.109702E-02  | 6.253104E-03  |
| 4    | C5    | -3.592959E-02 | -8.241299E-03 | 3.439027E-02  |
| 5    | C6    | 2.414258E-03  | 2.916011E-02  | 4.891493E-03  |
| 6    | C7    | 2.172547E-02  | -2.498377E-02 | -2.655680E-02 |
| 7    | C13   | 1.776470E-02  | -2.489095E-02 | 2.423915E-02  |
| 8    | H4    | 8.099431E-03  | 1.571016E-02  | -2.748483E-03 |
| 9    | C8    | -8.989727E-03 | 2.813047E-03  | 8.737148E-03  |
| 10   | C11   | 2.073446E-02  | -1.403474E-02 | -2.135011E-02 |
| 11   | H7    | 5.617432E-03  | -1.253712E-02 | -8.781297E-03 |
| 12   | C9    | -1.066947E-02 | 1.935235E-03  | 1.014118E-02  |
| 13   | H8    | 1.338669E-02  | 4.465009E-03  | -1.056642E-02 |
| 14   | C10   | 7.534698E-03  | -9.961889E-03 | -9.389467E-03 |
| 15   | C12   | -4.116184E-02 | -1.291056E-02 | 3.163420E-02  |
| 16   | C2    | 1.304881E-02  | 8.436034E-03  | -7.725578E-03 |
| 17   | H13   | -2.288695E-02 | -5.875229E-03 | -2.856836E-03 |
| 18   | C14   | -3.001289E-05 | 9.115626E-04  | -2.375293E-02 |
| 19   | H15   | 2.454104E-03  | 2.667852E-02  | -3.093814E-03 |
| 20   | C15   | -8.755934E-04 | 1.284549E-03  | -8.246274E-03 |
| 21   | C16   | 1.904926E-03  | 8.743392E-04  | -2.548369E-04 |
| 22   | C17   | -5.241454E-03 | -1.814770E-03 | 2.230640E-03  |
| 23   | C18   | -7.258278E-03 | -2.346623E-03 | -2.041341E-04 |
| 24   | C19   | 3.649640E-03  | 3.130199E-03  | -7.320720E-03 |
| 25   | H16   | -1.529594E-02 | -5.126618E-03 | -3.849080E-03 |
| 26   | H17   | 1.141142E-02  | 6.616599E-03  | -1.234182E-02 |
| 27   | H18   | 1.586235E-02  | 4.779575E-03  | 4.278800E-03  |
| 28   | H19   | -1.052798E-02 | -5.951830E-03 | 1.156894E-02  |
| 29   | H20   | 5.229882E-03  | -1.242672E-03 | 1.606278E-02  |
| 30   | C1    | 2.113894E-02  | 9.772674E-03  | -1.632786E-02 |
| 31   | H5    | -2.245682E-02 | -6.894493E-04 | -1.106135E-02 |
| 32   | H6    | 4.269849E-03  | -1.216673E-02 | 2.603804E-02  |
| 33   | C3    | 5.645640E-03  | 4.899727E-03  | -3.657363E-03 |
| 34   | C26   | 4.904907E-04  | 2.576969E-03  | 4.717966E-03  |

|       |       |               |               |               |
|-------|-------|---------------|---------------|---------------|
| 35    | C27   | -4.000485E-04 | -2.665549E-03 | -5.344084E-03 |
| 36    | C28   | 1.194079E-03  | -8.729806E-04 | -7.925486E-03 |
| 37    | C29   | 2.773262E-03  | 5.466727E-03  | 5.063842E-03  |
| 38    | H1    | 3.964567E-03  | -1.650721E-03 | -1.828743E-02 |
| 39    | H2    | 8.982905E-03  | 1.280343E-02  | 1.060548E-02  |
| 40    | H3    | -2.910655E-03 | 4.951888E-04  | 1.678907E-02  |
| 41    | H9    | -8.627735E-03 | -1.102210E-02 | -9.843115E-03 |
| 42    | H10   | -1.152274E-02 | -1.049380E-02 | 6.921504E-03  |
| 43    | H25   | 2.708121E-03  | -9.050340E-03 | -6.693826E-03 |
| ----- |       |               |               |               |
|       | total | 1.123978E-04  | 1.024489E-03  | 7.424633E-04  |

end of program derlb

start of program geopt 1

geometry optimization step 1

reading input hessian of dimension 129  
in five columns format

Level shifts adjusted to satisfy step-size constraints

Step size: 0.3000165

Cos(theta): 0.8700386

Final level shift: -9.0459602E-02

gradient maximum: 5.6400E-02 . ( 4.5000E-04 )

gradient rms: 1.1269E-02 . ( 3.0000E-04 )

step size: 0.30001 trust radius: 0.30000

displacement maximum: 7.9070E-02 . ( 1.8000E-03 )

displacement rms: 2.3571E-02 . ( 1.2000E-03 )

predicted energy change: -2.2790E-02 geom step: 3.0001E-

01 full step: 3.0001E-01

molecular structure not yet converged...

center of mass moved by:

x: 1.7900E-03 y: 7.9249E-03 z: 5.2280E-03

new geometry:

|      | angstroms     |               |               |
|------|---------------|---------------|---------------|
| atom | x             | y             | z             |
| N1   | -0.1851238607 | 0.4641584805  | 1.1496398783  |
| N2   | -0.9624306185 | -2.2803275995 | 1.1391335864  |
| C4   | -1.1923369589 | -0.0180925749 | 1.9481977188  |
| C5   | 0.0003838455  | -1.8866472314 | 0.4304247849  |
| C6   | -1.6131242204 | -1.3444054000 | 1.9677332987  |
| C7   | -1.7143322129 | 1.0107834641  | 2.7508560527  |
| C13  | 0.6888484121  | -2.8743700008 | -0.4705903976 |
| H4   | -3.0326107871 | -2.6499595048 | 2.8909113274  |
| C8   | -2.7758076385 | 0.6768625265  | 3.6172856202  |

|     |               |               |               |
|-----|---------------|---------------|---------------|
| C11 | -0.9256685288 | 2.1808482739  | 2.4168546928  |
| H7  | -3.2270829119 | 1.4262828740  | 4.2504106118  |
| C9  | -3.2256779072 | -0.6251283660 | 3.6377251029  |
| H8  | -4.0393570567 | -0.8900121801 | 4.2984882981  |
| C10 | -2.6561623240 | -1.6393208618 | 2.8310281808  |
| C12 | -0.0161416855 | 1.8156812458  | 1.4563175807  |
| C2  | 1.0081011308  | 2.6662618384  | 0.8151804166  |
| H13 | 1.7673251388  | -2.7356321765 | -0.3960304160 |
| C14 | 0.2466641767  | -2.7462605278 | -1.9265734159 |
| H15 | 0.4459377797  | -3.8754027525 | -0.1219375680 |
| C15 | -0.5453795077 | -2.5531842005 | -4.6103164906 |
| C16 | 1.1228101928  | -2.2821169158 | -2.9004344929 |
| C17 | -1.0389296276 | -3.1210357258 | -2.3122887225 |
| C18 | -1.4308521122 | -3.0220378034 | -3.6483671644 |
| C19 | 0.7311661555  | -2.1855070811 | -4.2360240634 |
| H16 | 2.1179862862  | -2.0041675136 | -2.6156208078 |
| H17 | -1.7271848709 | -3.4681454408 | -1.5658608400 |
| H18 | -2.4200252396 | -3.2868875229 | -3.9394618092 |
| H19 | 1.4207969829  | -1.8273231853 | -4.9765738859 |
| H20 | -0.8415814914 | -2.4643443665 | -5.6434658446 |
| C1  | 0.5813167973  | -0.4636626778 | 0.3433044617  |
| H5  | 1.6400268303  | -0.4816687726 | 0.6523424559  |
| H6  | 0.5606286448  | -0.1702832088 | -0.7202931642 |
| C3  | 2.9112386307  | 4.3243859975  | -0.3688081175 |
| C26 | 1.7641520157  | 3.5436729388  | 1.5963361301  |
| C27 | 1.2174113891  | 2.6356426600  | -0.5675864813 |
| C28 | 2.1639530001  | 3.4567854144  | -1.1533354185 |
| C29 | 2.7066639823  | 4.3656913408  | 1.0056564678  |
| H1  | 1.6123726912  | 3.5626682239  | 2.6583667114  |
| H2  | 0.6171678014  | 1.9866834111  | -1.1807727574 |
| H3  | 2.3092217370  | 3.4311451005  | -2.2201183904 |
| H9  | 3.2922168597  | 5.0359612586  | 1.6129911517  |
| H10 | 3.6489292197  | 4.9615184331  | -0.8293143894 |
| H25 | -1.0462406649 | 3.1705625677  | 2.8156287502  |

nuclear repulsion energy..... 1960.025589350 hartrees

/ end of geometry optimization iteration 1 /

end of program geopt

start of program onee

smallest eigenvalue of S: 2.977E-04

number of canonical orbitals..... 461

end of program onee

start of program probe

end of program probe

start of program grid

number of gridpoints:

| atom     | N1  | N2  | C4  | C5  | C6  | C7  | C13 |
|----------|-----|-----|-----|-----|-----|-----|-----|
| H4       |     |     |     |     |     |     |     |
| grid # 1 | 97  | 102 | 87  | 88  | 88  | 92  | 84  |
| 73       |     |     |     |     |     |     |     |
| grid # 2 | 103 | 112 | 95  | 95  | 96  | 101 | 92  |
| 118      |     |     |     |     |     |     |     |
| grid # 3 | 214 | 227 | 197 | 186 | 193 | 197 | 164 |
| 223      |     |     |     |     |     |     |     |
| grid # 4 | 393 | 413 | 326 | 321 | 328 | 351 | 300 |
| 224      |     |     |     |     |     |     |     |

number of gridpoints:

| atom     | C8  | C11 | H7  | C9  | H8  | C10 | C12 |
|----------|-----|-----|-----|-----|-----|-----|-----|
| C2       |     |     |     |     |     |     |     |
| grid # 1 | 89  | 87  | 73  | 87  | 73  | 89  | 86  |
| 93       |     |     |     |     |     |     |     |
| grid # 2 | 97  | 94  | 118 | 97  | 118 | 97  | 96  |
| 100      |     |     |     |     |     |     |     |
| grid # 3 | 184 | 184 | 223 | 184 | 222 | 185 | 195 |
| 197      |     |     |     |     |     |     |     |
| grid # 4 | 328 | 336 | 226 | 331 | 224 | 332 | 319 |
| 344      |     |     |     |     |     |     |     |

number of gridpoints:

| atom     | H13 | C14 | H15 | C15 | C16 | C17 | C18 |
|----------|-----|-----|-----|-----|-----|-----|-----|
| C19      |     |     |     |     |     |     |     |
| grid # 1 | 69  | 93  | 69  | 89  | 88  | 89  | 89  |
| 89       |     |     |     |     |     |     |     |
| grid # 2 | 109 | 100 | 109 | 97  | 96  | 96  | 97  |
| 97       |     |     |     |     |     |     |     |
| grid # 3 | 211 | 195 | 214 | 184 | 184 | 184 | 186 |
| 182      |     |     |     |     |     |     |     |
| grid # 4 | 216 | 340 | 216 | 328 | 328 | 330 | 331 |
| 328      |     |     |     |     |     |     |     |

number of gridpoints:

| atom     | H16 | H17 | H18 | H19 | H20 | C1  | H5  |
|----------|-----|-----|-----|-----|-----|-----|-----|
| H6       |     |     |     |     |     |     |     |
| grid # 1 | 72  | 72  | 73  | 73  | 73  | 82  | 72  |
| 69       |     |     |     |     |     |     |     |
| grid # 2 | 112 | 115 | 118 | 118 | 118 | 90  | 112 |
| 102      |     |     |     |     |     |     |     |
| grid # 3 | 213 | 216 | 223 | 222 | 223 | 166 | 217 |
| 205      |     |     |     |     |     |     |     |
| grid # 4 | 214 | 215 | 224 | 222 | 223 | 294 | 219 |
| 207      |     |     |     |     |     |     |     |

number of gridpoints:

|     |          |     |     |     |     |     |     |     |
|-----|----------|-----|-----|-----|-----|-----|-----|-----|
|     | atom     | C3  | C26 | C27 | C28 | C29 | H1  | H2  |
| H3  |          |     |     |     |     |     |     |     |
| 73  | grid # 1 | 89  | 87  | 87  | 89  | 89  | 72  | 70  |
| 118 | grid # 2 | 97  | 97  | 96  | 97  | 97  | 115 | 111 |
| 222 | grid # 3 | 185 | 181 | 183 | 184 | 184 | 218 | 213 |
| 224 | grid # 4 | 329 | 328 | 330 | 328 | 328 | 217 | 210 |

number of gridpoints:

|          |      |     |     |     |       |
|----------|------|-----|-----|-----|-------|
|          | atom | H9  | H10 | H25 | total |
| grid # 1 |      | 73  | 73  | 72  | 3523  |
| grid # 2 |      | 118 | 118 | 115 | 4494  |
| grid # 3 |      | 223 | 223 | 219 | 8635  |
| grid # 4 |      | 224 | 224 | 222 | 12295 |

end of program grid

start of program rwr  
end of program rwr

start of program scf

|      | i | u | d | i | g |                  |         | RMS     | maximum |
|------|---|---|---|---|---|------------------|---------|---------|---------|
|      | t | p | i | c | r |                  |         | density | DIIS    |
|      | e | d | i | u | i |                  | energy  | change  | error   |
|      | r | t | s | t | d | total energy     | change  |         |         |
| etot | 1 | N | N | 2 | U | -990.37561875819 |         | 2.2E-04 | 5.2E-03 |
| etot | 2 | Y | Y | 6 | M | -990.38629314976 | 1.1E-02 | 8.4E-05 | 2.1E-03 |
| etot | 3 | N | Y | 2 | U | -990.38722199985 | 9.3E-04 | 3.1E-05 | 7.2E-04 |
| etot | 4 | Y | Y | 6 | M | -990.38736835388 | 1.5E-04 | 1.3E-05 | 3.4E-04 |
| etot | 5 | Y | Y | 6 | M | -990.38740323781 | 3.5E-05 | 5.6E-06 | 1.3E-04 |
| etot | 6 | Y | Y | 6 | M | -990.38740916528 | 5.9E-06 | 2.4E-06 | 4.7E-05 |
| etot | 7 | Y | N | 6 | M | -990.38741265890 | 3.5E-06 | 0.0E+00 | 0.0E+00 |

Energy components, in hartrees:

|     |                               |                   |       |
|-----|-------------------------------|-------------------|-------|
| (A) | Nuclear repulsion.....        | 1960.02558935013  |       |
| (E) | Total one-electron terms..... | -5238.29315543660 |       |
| (I) | Total two-electron terms..... | 2287.88015342757  |       |
| (L) | Electronic energy.....        | -2950.41300200903 | (E+I) |
| (N) | Total energy.....             | -990.38741265890  | (A+L) |

SCFE: SCF energy: HF -990.38741265890 hartrees iterations:

7

HOMO energy: -0.26625  
LUMO energy: 0.09232

Orbital energies:

|           |           |           |           |           |           |
|-----------|-----------|-----------|-----------|-----------|-----------|
| -15.60805 | -15.56700 | -11.29787 | -11.29337 | -11.27638 | -11.25511 |
| -11.25341 | -11.25179 | -11.24692 | -11.24146 | -11.24113 | -11.24000 |
| -11.23941 | -11.23867 | -11.23797 | -11.23592 | -11.23504 | -11.23469 |
| -11.23278 | -11.23229 | -11.22657 | -11.22384 | -11.22377 | -11.21820 |
| -11.21692 | -1.31817  | -1.24994  | -1.16238  | -1.15889  | -1.13461  |
| -1.07262  | -1.06754  | -1.03658  | -1.02296  | -1.01802  | -1.01474  |
| -0.96749  | -0.95529  | -0.93114  | -0.85928  | -0.83758  | -0.83378  |
| -0.83067  | -0.80421  | -0.79354  | -0.76882  | -0.73077  | -0.71744  |
| -0.69958  | -0.69803  | -0.66500  | -0.65657  | -0.64316  | -0.63792  |
| -0.63536  | -0.62308  | -0.61992  | -0.61392  | -0.59697  | -0.59327  |
| -0.58930  | -0.58645  | -0.57884  | -0.55677  | -0.55072  | -0.54533  |
| -0.54289  | -0.51775  | -0.50819  | -0.50301  | -0.50024  | -0.49594  |
| -0.49263  | -0.49143  | -0.48732  | -0.48017  | -0.42932  | -0.40604  |
| -0.36912  | -0.34308  | -0.34234  | -0.33503  | -0.33025  | -0.28019  |
| -0.26625  | 0.09232   | 0.12603   | 0.13625   | 0.13684   | 0.14868   |
| 0.17722   | 0.20851   | 0.22157   | 0.23301   | 0.24218   |           |

end of program scf

start of program der1a  
end of program der1a

start of program rwr  
end of program rwr

start of program der1b

forces (hartrees/bohr) : total

| atom | label | x             | y             | z             |
|------|-------|---------------|---------------|---------------|
| 1    | N1    | -9.539155E-03 | 2.745592E-03  | 1.044822E-02  |
| 2    | N2    | -2.673465E-03 | 1.727028E-03  | 2.906341E-03  |
| 3    | C4    | -1.885556E-04 | 1.245403E-02  | 3.193744E-03  |
| 4    | C5    | 2.271285E-03  | 6.211561E-03  | 1.516907E-03  |
| 5    | C6    | -6.464198E-03 | 7.479387E-03  | 7.554108E-03  |
| 6    | C7    | 8.793345E-03  | -1.029557E-02 | -9.843759E-03 |
| 7    | C13   | -5.471678E-04 | -7.069051E-03 | -5.718790E-03 |
| 8    | H4    | 1.852086E-03  | 3.212933E-03  | -7.082379E-04 |
| 9    | C8    | 4.338852E-03  | 4.033060E-03  | -3.262937E-03 |
| 10   | C11   | 1.606909E-03  | -1.006096E-02 | -6.249112E-03 |
| 11   | H7    | 9.730113E-04  | -2.564706E-03 | -1.338833E-03 |
| 12   | C9    | -5.458253E-04 | -4.327700E-03 | -5.240229E-04 |
| 13   | H8    | 2.968983E-03  | 5.464179E-04  | -2.555816E-03 |
| 14   | C10   | 4.804096E-03  | 2.217867E-04  | -3.885245E-03 |

|       |       |               |               |               |
|-------|-------|---------------|---------------|---------------|
| 15    | C12   | -7.171547E-03 | -3.974109E-03 | 7.707933E-03  |
| 16    | C2    | 9.332330E-04  | 2.740879E-04  | -3.181994E-03 |
| 17    | H13   | -2.015010E-03 | -1.526317E-03 | -1.690651E-03 |
| 18    | C14   | 3.524810E-03  | -3.916218E-04 | -2.663166E-03 |
| 19    | H15   | 1.889224E-03  | 3.787146E-03  | 1.319866E-03  |
| 20    | C15   | -1.027612E-03 | 6.505881E-05  | 3.781739E-04  |
| 21    | C16   | -4.116869E-03 | -8.483180E-04 | -5.317073E-03 |
| 22    | C17   | -1.277121E-04 | 3.725580E-03  | -1.022516E-02 |
| 23    | C18   | 8.848389E-03  | 3.067855E-03  | 9.831513E-03  |
| 24    | C19   | 3.253650E-03  | -3.767333E-04 | 8.365422E-03  |
| 25    | H16   | 4.090188E-03  | 1.430527E-03  | -2.015014E-04 |
| 26    | H17   | -2.307131E-03 | -1.447538E-03 | 4.755238E-04  |
| 27    | H18   | -8.359663E-03 | -3.799457E-03 | -4.288966E-04 |
| 28    | H19   | 2.299917E-03  | 9.846778E-04  | -2.783170E-04 |
| 29    | H20   | -1.387235E-03 | -1.403497E-03 | 2.321291E-03  |
| 30    | C1    | 3.683293E-03  | 3.676776E-03  | -8.195002E-03 |
| 31    | H5    | -9.851720E-03 | -8.517076E-04 | -2.436073E-03 |
| 32    | H6    | 1.473065E-03  | -4.295533E-03 | 1.252041E-02  |
| 33    | C3    | 3.914041E-04  | -3.266543E-04 | 4.963776E-04  |
| 34    | C26   | -2.384326E-03 | -3.429782E-03 | -4.918934E-03 |
| 35    | C27   | -1.975575E-03 | -5.180976E-04 | 5.429357E-03  |
| 36    | C28   | 1.047866E-03  | 1.965373E-03  | 9.943780E-04  |
| 37    | C29   | 2.585439E-03  | 2.168460E-03  | -3.629454E-03 |
| 38    | H1    | 4.052696E-04  | 7.061260E-05  | 1.388971E-03  |
| 39    | H2    | 5.731526E-04  | 1.449645E-03  | 2.603645E-05  |
| 40    | H3    | 3.735787E-05  | -1.572279E-04 | 8.376755E-04  |
| 41    | H9    | -9.939832E-04 | -7.438282E-04 | -2.855378E-04 |
| 42    | H10   | -1.057111E-03 | -6.022944E-04 | 1.457865E-03  |
| 43    | H25   | 1.116333E-03  | -1.534056E-03 | -1.866734E-03 |
| ----- |       |               |               |               |
|       | total | 1.027296E-03  | 7.528330E-04  | -2.351347E-04 |

end of program der1b

start of program geopt 2

geometry optimization step 2

reading input hessian of dimension 129  
in five columns format

Level shifts adjusted to satisfy step-size constraints

Step size: 0.3001262

Cos(theta): 0.4522028

Final level shift: -7.1431608E-03

energy change: -2.1167E-02 . ( 5.0000E-05 )

gradient maximum: 2.0310E-02 . ( 4.5000E-04 )

gradient rms: 3.9611E-03 . ( 3.0000E-04 )

step size: 0.29998 trust radius: 0.30000



displacement maximum: 1.2227E-01 . ( 1.8000E-03 )  
 displacement rms: 2.3569E-02 . ( 1.2000E-03 )  
 predicted energy change: -3.7426E-03 geom step: 2.9998E-  
 01 full step: 2.9998E-01  
 molecular structure not yet converged...

center of mass moved by:

x: -9.2535E-03 y: 3.1123E-03 z: 1.4212E-03

new geometry:

|      | angstroms     |               |               |
|------|---------------|---------------|---------------|
| atom | x             | y             | z             |
| N1   | -0.2322091003 | 0.4425447477  | 1.1722376588  |
| N2   | -1.0170271355 | -2.2784648229 | 1.1730995628  |
| C4   | -1.2206159278 | -0.0226657246 | 1.9837450839  |
| C5   | -0.0448348209 | -1.9052512670 | 0.4751983779  |
| C6   | -1.6507777180 | -1.3371163143 | 2.0094539253  |
| C7   | -1.7024716670 | 0.9919018866  | 2.7899381630  |
| C13  | 0.6283020713  | -2.9170533017 | -0.4248611566 |
| H4   | -3.0346295842 | -2.6472027368 | 2.9359624232  |
| C8   | -2.7497248744 | 0.6679486212  | 3.6759761067  |
| C11  | -0.9219400908 | 2.1551243638  | 2.4291375123  |
| H7   | -3.1822925194 | 1.4081076944  | 4.3208527754  |
| C9   | -3.2122659889 | -0.6338983252 | 3.7021230748  |
| H8   | -4.0092368660 | -0.8922566392 | 4.3712351952  |
| C10  | -2.6664125428 | -1.6434906978 | 2.8798451206  |
| C12  | -0.0462186113 | 1.7852092098  | 1.4609796706  |
| C2   | 0.9639603762  | 2.6172556086  | 0.7603660644  |
| H13  | 1.7049014864  | -2.8504962231 | -0.3042157835 |
| C14  | 0.2872845063  | -2.7186247711 | -1.9011082558 |
| H15  | 0.3111604572  | -3.8957135626 | -0.0910075502 |
| C15  | -0.3637160763 | -2.3879002288 | -4.5957973831 |
| C16  | 1.2521389896  | -2.2939910017 | -2.8167452985 |
| C17  | -1.0099224983 | -2.9730715129 | -2.3497803317 |
| C18  | -1.3345315137 | -2.8115555909 | -3.6881685682 |
| C19  | 0.9281516443  | -2.1274223633 | -4.1580106912 |
| H16  | 2.2689730521  | -2.0919467686 | -2.4900654971 |
| H17  | -1.7651731246 | -3.3056021719 | -1.6519350479 |
| H18  | -2.3449269541 | -3.0307603123 | -4.0214737620 |
| H19  | 1.6928080246  | -1.7993395561 | -4.8496324883 |
| H20  | -0.6146895035 | -2.2677049661 | -5.6318950361 |
| C1   | 0.5593460744  | -0.4968540721 | 0.4025037161  |
| H5   | 1.5835558214  | -0.5417582018 | 0.7564692615  |
| H6   | 0.6038790034  | -0.2150061772 | -0.6400473898 |
| C3   | 2.8215489000  | 4.2490688071  | -0.5283409458 |
| C26  | 1.8492457635  | 3.4064361869  | 1.4997536269  |
| C27  | 1.0238745658  | 2.6583201916  | -0.6349113427 |
| C28  | 1.9515451393  | 3.4616543589  | -1.2728168602 |
| C29  | 2.7672368925  | 4.2206654051  | 0.8601900607  |
| H1   | 1.8310545892  | 3.3653506796  | 2.5769048131  |
| H2   | 0.3330469792  | 2.0787631427  | -1.2253750449 |
| H3   | 1.9815361995  | 3.4802193197  | -2.3500591580 |

|     |               |              |               |
|-----|---------------|--------------|---------------|
| H9  | 3.4413282681  | 4.8236548923 | 1.4492434236  |
| H10 | 3.5316247441  | 4.8745490259 | -1.0248311658 |
| H25 | -1.0230567326 | 3.1472274108 | 2.8145615026  |

nuclear repulsion energy..... 1967.210994655 hartrees

/ end of geometry optimization iteration 2 /

end of program geopt

start of program onee

smallest eigenvalue of S: 2.843E-04

number of canonical orbitals..... 461

end of program onee

start of program probe

end of program probe

start of program grid

number of gridpoints:

| atom     | N1  | N2  | C4  | C5  | C6  | C7  | C13 |
|----------|-----|-----|-----|-----|-----|-----|-----|
| H4       |     |     |     |     |     |     |     |
| grid # 1 | 97  | 102 | 84  | 88  | 87  | 89  | 84  |
| 73       |     |     |     |     |     |     |     |
| grid # 2 | 104 | 112 | 96  | 95  | 97  | 97  | 92  |
| 118      |     |     |     |     |     |     |     |
| grid # 3 | 214 | 227 | 196 | 186 | 189 | 198 | 163 |
| 223      |     |     |     |     |     |     |     |
| grid # 4 | 391 | 413 | 320 | 320 | 324 | 348 | 300 |
| 224      |     |     |     |     |     |     |     |

number of gridpoints:

| atom     | C8  | C11 | H7  | C9  | H8  | C10 | C12 |
|----------|-----|-----|-----|-----|-----|-----|-----|
| C2       |     |     |     |     |     |     |     |
| grid # 1 | 89  | 87  | 73  | 87  | 73  | 89  | 86  |
| 92       |     |     |     |     |     |     |     |
| grid # 2 | 97  | 94  | 118 | 97  | 118 | 97  | 94  |
| 100      |     |     |     |     |     |     |     |
| grid # 3 | 184 | 185 | 223 | 186 | 222 | 184 | 194 |
| 196      |     |     |     |     |     |     |     |
| grid # 4 | 330 | 331 | 226 | 331 | 223 | 327 | 316 |
| 343      |     |     |     |     |     |     |     |

number of gridpoints:

| atom | H13 | C14 | H15 | C15 | C16 | C17 | C18 |
|------|-----|-----|-----|-----|-----|-----|-----|
| C19  |     |     |     |     |     |     |     |

|          |     |     |     |     |     |     |     |
|----------|-----|-----|-----|-----|-----|-----|-----|
| grid # 1 | 69  | 93  | 69  | 89  | 88  | 88  | 89  |
| grid # 2 | 109 | 101 | 109 | 97  | 96  | 96  | 97  |
| grid # 3 | 211 | 195 | 214 | 184 | 185 | 184 | 185 |
| grid # 4 | 214 | 342 | 212 | 329 | 329 | 328 | 328 |

number of gridpoints:

|          |     |     |     |     |     |     |     |
|----------|-----|-----|-----|-----|-----|-----|-----|
| atom     | H16 | H17 | H18 | H19 | H20 | C1  | H5  |
| grid # 1 | 72  | 73  | 73  | 73  | 73  | 82  | 70  |
| grid # 2 | 113 | 115 | 118 | 118 | 118 | 88  | 109 |
| grid # 3 | 214 | 215 | 223 | 222 | 224 | 165 | 217 |
| grid # 4 | 221 | 215 | 224 | 222 | 224 | 290 | 217 |

number of gridpoints:

|          |     |     |     |     |     |     |     |
|----------|-----|-----|-----|-----|-----|-----|-----|
| atom     | C3  | C26 | C27 | C28 | C29 | H1  | H2  |
| grid # 1 | 89  | 89  | 88  | 89  | 89  | 72  | 71  |
| grid # 2 | 97  | 95  | 96  | 97  | 97  | 115 | 114 |
| grid # 3 | 185 | 182 | 185 | 184 | 184 | 218 | 214 |
| grid # 4 | 328 | 328 | 330 | 328 | 329 | 218 | 210 |

number of gridpoints:

|          |     |     |     |       |
|----------|-----|-----|-----|-------|
| atom     | H9  | H10 | H25 | total |
| grid # 1 | 73  | 73  | 72  | 3517  |
| grid # 2 | 118 | 118 | 115 | 4490  |
| grid # 3 | 223 | 223 | 220 | 8640  |
| grid # 4 | 223 | 224 | 224 | 12258 |

end of program grid

start of program rwr  
recomputing RwR matrix 1 grid: 4  
end of program rwr

start of program scf

|   |   |   |   |   |
|---|---|---|---|---|
| i | u | d | i | g |
| t | p | i | c | r |

RMS maximum

|      | e | d | i | u | i |                  | energy  | density | DIIS    |
|------|---|---|---|---|---|------------------|---------|---------|---------|
|      | r | t | s | t | d | total energy     | change  | change  | error   |
| etot | 1 | N | N | 2 | U | -990.33510685770 |         | 3.7E-04 | 3.1E-02 |
| etot | 2 | Y | Y | 6 | M | -990.38314472816 | 4.8E-02 | 1.8E-04 | 1.2E-02 |
| etot | 3 | N | Y | 2 | U | -990.38935537066 | 6.2E-03 | 5.3E-05 | 3.1E-03 |
| etot | 4 | Y | Y | 6 | M | -990.38969679674 | 3.4E-04 | 2.3E-05 | 1.1E-03 |
| etot | 5 | Y | Y | 6 | M | -990.38977611385 | 7.9E-05 | 7.6E-06 | 2.8E-04 |
| etot | 6 | N | Y | 2 | U | -990.38979109239 | 1.5E-05 | 3.0E-06 | 6.9E-05 |
| etot | 7 | Y | N | 6 | M | -990.38979365506 | 2.6E-06 | 0.0E+00 | 0.0E+00 |

Energy components, in hartrees:

|     |                               |                   |       |
|-----|-------------------------------|-------------------|-------|
| (A) | Nuclear repulsion.....        | 1967.21099465467  |       |
| (E) | Total one-electron terms..... | -5252.71557057016 |       |
| (I) | Total two-electron terms..... | 2295.11478226043  |       |
| (L) | Electronic energy.....        | -2957.60078830974 | (E+I) |
| (N) | Total energy.....             | -990.38979365506  | (A+L) |

SCFE: SCF energy: HF -990.38979365506 hartrees iterations:

7

HOMO energy: -0.26875  
LUMO energy: 0.09679

Orbital energies:

|           |           |           |           |           |           |
|-----------|-----------|-----------|-----------|-----------|-----------|
| -15.60440 | -15.56408 | -11.29484 | -11.28605 | -11.27171 | -11.25310 |
| -11.25060 | -11.24821 | -11.24599 | -11.24090 | -11.23981 | -11.23932 |
| -11.23928 | -11.23863 | -11.23847 | -11.23780 | -11.23743 | -11.23721 |
| -11.23472 | -11.23260 | -11.22506 | -11.21958 | -11.21917 | -11.21594 |
| -11.21230 | -1.32371  | -1.25138  | -1.16194  | -1.15811  | -1.13746  |
| -1.07380  | -1.06529  | -1.03784  | -1.02261  | -1.01706  | -1.01675  |
| -0.97106  | -0.95358  | -0.93345  | -0.86016  | -0.83584  | -0.83204  |
| -0.82722  | -0.80690  | -0.79592  | -0.76979  | -0.73260  | -0.71689  |
| -0.70107  | -0.69646  | -0.66553  | -0.65782  | -0.64254  | -0.63657  |
| -0.63323  | -0.62328  | -0.62039  | -0.61546  | -0.59597  | -0.59273  |
| -0.59071  | -0.58733  | -0.57653  | -0.55793  | -0.55254  | -0.54806  |
| -0.54230  | -0.51743  | -0.50677  | -0.50276  | -0.50055  | -0.49573  |
| -0.49322  | -0.49115  | -0.48789  | -0.48019  | -0.42914  | -0.40421  |
| -0.36715  | -0.34259  | -0.34204  | -0.33775  | -0.32820  | -0.28241  |
| -0.26875  | 0.09679   | 0.12767   | 0.13691   | 0.13716   | 0.14724   |
| 0.17920   | 0.20956   | 0.22641   | 0.23420   | 0.24136   |           |

end of program scf

start of program derla  
end of program derla

start of program rwr

```
recomputing Rwr matrix 1      grid: 4
end of program rwr
```

```
start of program der1b
```

```
forces (hartrees/bohr) : total
```

| atom | label | x             | y             | z             |
|------|-------|---------------|---------------|---------------|
| 1    | N1    | 1.305964E-03  | -1.677270E-03 | -2.594790E-03 |
| 2    | N2    | -7.405171E-03 | -1.586511E-03 | 6.320733E-03  |
| 3    | C4    | 3.028731E-03  | 1.790473E-03  | -3.798228E-04 |
| 4    | C5    | 7.226851E-03  | 4.524737E-03  | -7.098855E-03 |
| 5    | C6    | 2.476199E-04  | -3.135427E-03 | 2.297075E-04  |
| 6    | C7    | -2.330886E-03 | 2.478329E-03  | 3.273788E-04  |
| 7    | C13   | 2.227097E-04  | 1.311746E-03  | -4.798910E-03 |
| 8    | H4    | -1.002454E-03 | -3.214195E-03 | -8.533394E-05 |
| 9    | C8    | 2.159221E-03  | -4.853058E-03 | -3.527892E-03 |
| 10   | C11   | -3.302127E-03 | -1.233147E-03 | 3.282272E-03  |
| 11   | H7    | -7.362198E-04 | 1.749372E-03  | 1.319340E-03  |
| 12   | C9    | 3.320533E-03  | 4.276770E-03  | -1.934309E-03 |
| 13   | H8    | -1.912353E-03 | -7.144657E-04 | 1.822387E-03  |
| 14   | C10   | 8.315593E-04  | 4.548646E-03  | 7.271826E-04  |
| 15   | C12   | 4.548962E-03  | -1.450949E-03 | -2.371630E-03 |
| 16   | C2    | -9.938152E-04 | 7.535157E-04  | 1.267906E-03  |
| 17   | H13   | 1.386542E-03  | -4.258552E-04 | 9.927676E-04  |
| 18   | C14   | 2.299989E-03  | -7.682804E-05 | 1.238775E-03  |
| 19   | H15   | 1.984307E-04  | -8.884950E-04 | -8.118002E-04 |
| 20   | C15   | -6.451323E-04 | -1.027048E-03 | 4.774511E-03  |
| 21   | C16   | -2.632256E-04 | -3.149773E-04 | 3.356515E-03  |
| 22   | C17   | 1.008954E-03  | 6.183636E-05  | -1.888416E-03 |
| 23   | C18   | 1.484312E-04  | -5.973317E-04 | -2.098115E-03 |
| 24   | C19   | -1.156244E-03 | -3.591191E-04 | 4.042049E-04  |
| 25   | H16   | -7.120642E-03 | -2.020923E-03 | -6.701640E-04 |
| 26   | H17   | 3.236541E-03  | 1.487269E-03  | -1.213183E-03 |
| 27   | H18   | 7.301887E-03  | 2.526935E-03  | 1.127166E-03  |
| 28   | H19   | -4.266701E-03 | -1.422013E-03 | 1.600621E-03  |
| 29   | H20   | -5.797366E-04 | 3.861398E-04  | -2.246165E-03 |
| 30   | C1    | -5.155529E-03 | -8.921110E-04 | 1.159786E-03  |
| 31   | H5    | 2.282436E-03  | 2.852896E-04  | 2.405521E-03  |
| 32   | H6    | -2.782347E-04 | 1.257850E-03  | -1.502622E-03 |
| 33   | C3    | -3.641709E-03 | -3.629131E-03 | 3.069671E-03  |
| 34   | C26   | -2.578335E-03 | -3.574081E-03 | -3.583493E-04 |
| 35   | C27   | -8.629869E-04 | -1.384270E-03 | 3.235411E-03  |
| 36   | C28   | 1.635804E-03  | 2.327281E-03  | 9.648920E-04  |
| 37   | C29   | 8.904502E-04  | 7.644047E-04  | -3.194343E-03 |
| 38   | H1    | -1.706450E-03 | -2.318215E-04 | -2.241600E-03 |
| 39   | H2    | 4.690082E-04  | 6.810360E-04  | 2.172640E-03  |
| 40   | H3    | 8.078606E-04  | 8.518771E-04  | 1.530140E-03  |
| 41   | H9    | -1.100102E-03 | -1.113211E-03 | -2.495881E-03 |
| 42   | H10   | 3.825774E-03  | 3.254866E-03  | -2.412596E-03 |

|       |       |               |              |               |
|-------|-------|---------------|--------------|---------------|
| 43    | H25   | -2.808875E-04 | 1.593320E-03 | 4.916000E-04  |
| ----- |       |               |              |               |
|       | total | 1.065317E-03  | 1.089457E-03 | -1.036505E-04 |

end of program derlb

start of program geopt 3

geometry optimization step 3

reading input hessian of dimension 129

in five columns format

reading input hessian of dimension 129

in five columns format

Level shifts adjusted to satisfy step-size constraints

Step size: 0.3000236

Cos(theta): 0.4953472

Final level shift: -1.6630388E-02

energy change: -2.3810E-03 . ( 5.0000E-05 )

gradient maximum: 9.9076E-03 . ( 4.5000E-04 )

gradient rms: 2.3236E-03 . ( 3.0000E-04 )

step size: 0.29975 trust radius: 0.30000

displacement maximum: 1.0837E-01 . ( 1.8000E-03 )

displacement rms: 2.3551E-02 . ( 1.2000E-03 )

predicted energy change: -2.9446E-03 geom step: 2.9975E-

01 full step: 2.9975E-01

molecular structure not yet converged...

center of mass moved by:

x: 4.5379E-03 y: 1.6225E-03 z: -1.0573E-02

new geometry:

|      | angstroms     |               |               |
|------|---------------|---------------|---------------|
| atom | x             | y             | z             |
| N1   | -0.2064093151 | 0.4564334872  | 1.1449569640  |
| N2   | -0.9777143120 | -2.2675882391 | 1.1401282031  |
| C4   | -1.2067896365 | -0.0074822023 | 1.9347114372  |
| C5   | 0.0100178696  | -1.8812418506 | 0.4407932188  |
| C6   | -1.6301115836 | -1.3290633316 | 1.9647297688  |
| C7   | -1.7180530931 | 1.0023503931  | 2.7134818099  |
| C13  | 0.7013842690  | -2.8816737324 | -0.4740592873 |
| H4   | -3.0216327063 | -2.6539904306 | 2.8557401227  |
| C8   | -2.7796853502 | 0.6766421222  | 3.5699349035  |
| C11  | -0.9469746435 | 2.1651389329  | 2.3678165600  |
| H7   | -3.2396438255 | 1.4178307697  | 4.2013122414  |
| C9   | -3.2317902692 | -0.6316840549 | 3.6015379272  |
| H8   | -4.0475645815 | -0.8929676898 | 4.2526147254  |
| C10  | -2.6592479127 | -1.6425581119 | 2.8070396413  |

|     |               |               |               |
|-----|---------------|---------------|---------------|
| C12 | -0.0282154727 | 1.7951337785  | 1.4350689770  |
| C2  | 0.9934644979  | 2.6280168532  | 0.7795619441  |
| H13 | 1.7730430366  | -2.7575478083 | -0.4156955215 |
| C14 | 0.2865859920  | -2.7249268767 | -1.9051731340 |
| H15 | 0.4713121897  | -3.8629015133 | -0.0943843922 |
| C15 | -0.5615655542 | -2.4619627032 | -4.5190042806 |
| C16 | 1.1125815133  | -2.1862381413 | -2.8583626252 |
| C17 | -0.9661916103 | -3.1291782413 | -2.2777042664 |
| C18 | -1.3890096252 | -3.0026868085 | -3.5700862667 |
| C19 | 0.6893320833  | -2.0524259860 | -4.1584209800 |
| H16 | 2.0979129012  | -1.8591107039 | -2.5945051992 |
| H17 | -1.6160289056 | -3.5619217481 | -1.5421987308 |
| H18 | -2.3733434532 | -3.3581172536 | -3.8357831773 |
| H19 | 1.3434543159  | -1.6264018218 | -4.8889259482 |
| H20 | -0.9021702747 | -2.3804723563 | -5.5318037396 |
| C1  | 0.5974414175  | -0.4754948750 | 0.3889408228  |
| H5  | 1.6054220101  | -0.5235796038 | 0.7857568676  |
| H6  | 0.6751609178  | -0.1866596432 | -0.6452941877 |
| C3  | 2.9244707837  | 4.2594570176  | -0.3923566804 |
| C26 | 1.7907979932  | 3.4485799055  | 1.5329596121  |
| C27 | 1.1713262529  | 2.6405355796  | -0.5729922605 |
| C28 | 2.1366910125  | 3.4439199169  | -1.1538018568 |
| C29 | 2.7452329284  | 4.2656384654  | 0.9532276351  |
| H1  | 1.6745334301  | 3.4364257238  | 2.5857229416  |
| H2  | 0.5529801450  | 2.0327292614  | -1.1904461656 |
| H3  | 2.2687279040  | 3.4308993892  | -2.2062196320 |
| H9  | 3.3448720185  | 4.8980738147  | 1.5650329855  |
| H10 | 3.6696029435  | 4.8876836769  | -0.8403675527 |
| H25 | -1.0676334116 | 3.1643232144  | 2.7358050805  |

nuclear repulsion energy..... 1978.365603056 hartrees

-----  
 / end of geometry optimization iteration 3 /  
 -----

end of program geopt

start of program onee  
 smallest eigenvalue of S: 2.790E-04  
 number of canonical orbitals..... 461  
 end of program onee

start of program probe  
 end of program probe

start of program grid

number of gridpoints:

|          |     |     |     |     |     |     |     |
|----------|-----|-----|-----|-----|-----|-----|-----|
| atom     | N1  | N2  | C4  | C5  | C6  | C7  | C13 |
| H4       |     |     |     |     |     |     |     |
| grid # 1 | 96  | 102 | 86  | 88  | 90  | 88  | 84  |
| 73       |     |     |     |     |     |     |     |
| grid # 2 | 104 | 112 | 95  | 95  | 99  | 96  | 92  |
| 118      |     |     |     |     |     |     |     |
| grid # 3 | 214 | 227 | 194 | 188 | 192 | 198 | 164 |
| 224      |     |     |     |     |     |     |     |
| grid # 4 | 389 | 414 | 321 | 321 | 322 | 344 | 298 |
| 223      |     |     |     |     |     |     |     |

number of gridpoints:

|          |     |     |     |     |     |     |     |
|----------|-----|-----|-----|-----|-----|-----|-----|
| atom     | C8  | C11 | H7  | C9  | H8  | C10 | C12 |
| C2       |     |     |     |     |     |     |     |
| grid # 1 | 89  | 87  | 73  | 87  | 73  | 89  | 86  |
| 88       |     |     |     |     |     |     |     |
| grid # 2 | 97  | 94  | 118 | 97  | 118 | 97  | 94  |
| 99       |     |     |     |     |     |     |     |
| grid # 3 | 185 | 184 | 223 | 185 | 222 | 184 | 195 |
| 191      |     |     |     |     |     |     |     |
| grid # 4 | 331 | 331 | 226 | 330 | 223 | 326 | 320 |
| 339      |     |     |     |     |     |     |     |

number of gridpoints:

|          |     |     |     |     |     |     |     |
|----------|-----|-----|-----|-----|-----|-----|-----|
| atom     | H13 | C14 | H15 | C15 | C16 | C17 | C18 |
| C19      |     |     |     |     |     |     |     |
| grid # 1 | 69  | 93  | 69  | 87  | 86  | 87  | 87  |
| 87       |     |     |     |     |     |     |     |
| grid # 2 | 109 | 101 | 109 | 97  | 96  | 96  | 97  |
| 97       |     |     |     |     |     |     |     |
| grid # 3 | 211 | 191 | 213 | 182 | 182 | 181 | 182 |
| 182      |     |     |     |     |     |     |     |
| grid # 4 | 209 | 339 | 212 | 325 | 327 | 327 | 328 |
| 327      |     |     |     |     |     |     |     |

number of gridpoints:

|          |     |     |     |     |     |     |     |
|----------|-----|-----|-----|-----|-----|-----|-----|
| atom     | H16 | H17 | H18 | H19 | H20 | C1  | H5  |
| H6       |     |     |     |     |     |     |     |
| grid # 1 | 72  | 72  | 73  | 73  | 73  | 82  | 70  |
| 69       |     |     |     |     |     |     |     |
| grid # 2 | 113 | 114 | 118 | 118 | 118 | 87  | 108 |
| 103      |     |     |     |     |     |     |     |
| grid # 3 | 213 | 215 | 222 | 221 | 223 | 163 | 217 |
| 204      |     |     |     |     |     |     |     |
| grid # 4 | 213 | 214 | 223 | 222 | 224 | 290 | 217 |
| 202      |     |     |     |     |     |     |     |

number of gridpoints:

|          |    |     |     |     |     |    |    |
|----------|----|-----|-----|-----|-----|----|----|
| atom     | C3 | C26 | C27 | C28 | C29 | H1 | H2 |
| H3       |    |     |     |     |     |    |    |
| grid # 1 | 89 | 87  | 86  | 87  | 87  | 72 | 70 |
| 73       |    |     |     |     |     |    |    |



|          |     |     |     |     |     |     |     |
|----------|-----|-----|-----|-----|-----|-----|-----|
| grid # 2 | 97  | 96  | 96  | 97  | 97  | 115 | 113 |
| 118      |     |     |     |     |     |     |     |
| grid # 3 | 182 | 181 | 182 | 182 | 183 | 217 | 213 |
| 222      |     |     |     |     |     |     |     |
| grid # 4 | 328 | 326 | 327 | 327 | 324 | 216 | 210 |
| 222      |     |     |     |     |     |     |     |

number of gridpoints:

|          |     |     |     |       |
|----------|-----|-----|-----|-------|
| atom     | H9  | H10 | H25 | total |
| grid # 1 | 73  | 73  | 72  | 3497  |
| grid # 2 | 118 | 118 | 115 | 4486  |
| grid # 3 | 222 | 222 | 219 | 8597  |
| grid # 4 | 223 | 223 | 222 | 12205 |

end of program grid

start of program rwr

end of program rwr

start of program scf

|      | i | u | d | i | g |                  |          | RMS     | maximum |
|------|---|---|---|---|---|------------------|----------|---------|---------|
|      | t | p | i | c | r |                  |          | density | DIIS    |
|      | e | d | i | u | i |                  | energy   | change  | error   |
|      | r | t | s | t | d | total energy     | change   |         |         |
| etot | 1 | N | N | 2 | U | -990.32090183004 |          | 4.0E-04 | 2.7E-02 |
| etot | 2 | Y | Y | 6 | M | -990.37602444074 | 5.5E-02  | 1.9E-04 | 1.1E-02 |
| etot | 3 | N | Y | 2 | U | -990.38279174353 | 6.8E-03  | 5.6E-05 | 2.9E-03 |
| etot | 4 | Y | Y | 6 | M | -990.38330673990 | 5.1E-04  | 2.8E-05 | 1.2E-03 |
| etot | 5 | Y | Y | 6 | M | -990.38339751676 | 9.1E-05  | 7.9E-06 | 2.7E-04 |
| etot | 6 | N | Y | 2 | U | -990.38336351948 | -3.4E-05 | 3.5E-06 | 8.1E-05 |
| etot | 7 | Y | N | 6 | M | -990.38336784090 | 4.3E-06  | 0.0E+00 | 0.0E+00 |

Energy components, in hartrees:

|     |                               |                   |       |
|-----|-------------------------------|-------------------|-------|
| (A) | Nuclear repulsion.....        | 1978.36560305571  |       |
| (E) | Total one-electron terms..... | -5274.81755689824 |       |
| (I) | Total two-electron terms..... | 2306.06858600163  |       |
| (L) | Electronic energy.....        | -2968.74897089661 | (E+I) |
| (N) | Total energy.....             | -990.38336784090  | (A+L) |

SCFE: SCF energy: HF -990.38336784090 hartrees iterations:  
7

HOMO energy: -0.26814  
LUMO energy: 0.09639

Orbital energies:

|           |           |           |           |           |           |
|-----------|-----------|-----------|-----------|-----------|-----------|
| -15.60547 | -15.56550 | -11.29770 | -11.28619 | -11.27078 | -11.25022 |
| -11.24528 | -11.24450 | -11.23825 | -11.23745 | -11.23449 | -11.23301 |
| -11.23221 | -11.23109 | -11.23069 | -11.23034 | -11.22948 | -11.22838 |
| -11.22673 | -11.22459 | -11.22253 | -11.21876 | -11.21686 | -11.21593 |
| -11.21192 | -1.32742  | -1.24676  | -1.17463  | -1.17229  | -1.14078  |
| -1.07809  | -1.07260  | -1.04756  | -1.02329  | -1.02291  | -1.02144  |
| -0.97578  | -0.95637  | -0.93529  | -0.86214  | -0.84435  | -0.83597  |
| -0.83375  | -0.80916  | -0.79677  | -0.77365  | -0.73422  | -0.72183  |
| -0.70571  | -0.70299  | -0.66886  | -0.65951  | -0.64726  | -0.64126  |
| -0.63446  | -0.62424  | -0.62327  | -0.61823  | -0.59835  | -0.59393  |
| -0.59044  | -0.58890  | -0.58373  | -0.56063  | -0.55582  | -0.54996  |
| -0.54261  | -0.52147  | -0.51054  | -0.50427  | -0.50252  | -0.49989  |
| -0.49515  | -0.49181  | -0.48895  | -0.48236  | -0.42870  | -0.40579  |
| -0.37068  | -0.34887  | -0.34027  | -0.33992  | -0.33265  | -0.28268  |
| -0.26814  | 0.09639   | 0.13129   | 0.13834   | 0.14272   | 0.15301   |
| 0.18158   | 0.21027   | 0.22587   | 0.23576   | 0.24199   |           |

end of program scf

start of program derla  
end of program derla

start of program rwr  
end of program rwr

start of program der1b

forces (hartrees/bohr) : total

| atom | label | x             | y             | z             |
|------|-------|---------------|---------------|---------------|
| 1    | N1    | 2.088108E-03  | -1.816608E-03 | -3.641703E-03 |
| 2    | N2    | 1.359145E-02  | 2.603072E-03  | -9.392358E-03 |
| 3    | C4    | 4.660404E-04  | -1.020443E-02 | -2.510234E-03 |
| 4    | C5    | -1.216198E-02 | -6.585574E-03 | 6.161446E-03  |
| 5    | C6    | 7.087680E-03  | -4.398158E-04 | -6.447246E-03 |
| 6    | C7    | -3.899426E-03 | 5.933573E-03  | 2.324081E-03  |
| 7    | C13   | 3.821605E-03  | 5.890252E-03  | 1.357044E-02  |
| 8    | H4    | 2.973135E-04  | 4.132462E-04  | 7.230307E-05  |
| 9    | C8    | -6.397915E-03 | -7.377681E-03 | 4.298384E-03  |
| 10   | C11   | 3.207322E-03  | 5.420828E-03  | 1.334689E-03  |
| 11   | H7    | 6.085201E-04  | 2.998135E-05  | -7.440425E-04 |
| 12   | C9    | -3.822426E-04 | 8.286041E-03  | 2.243006E-03  |
| 13   | H8    | 2.340008E-04  | 7.691603E-04  | 4.906764E-04  |
| 14   | C10   | -1.938760E-03 | -6.468270E-04 | 1.244062E-03  |
| 15   | C12   | -6.102382E-03 | -1.064691E-03 | 1.815286E-03  |
| 16   | C2    | -8.753000E-03 | -6.468478E-03 | 1.178688E-02  |
| 17   | H13   | 5.162556E-03  | 1.641355E-03  | 3.634586E-03  |
| 18   | C14   | 3.407200E-03  | -1.591991E-03 | 8.898751E-03  |

|       |       |               |               |               |
|-------|-------|---------------|---------------|---------------|
| 19    | H15   | -2.336800E-03 | -4.255029E-03 | -1.094404E-03 |
| 20    | C15   | -8.884359E-03 | -7.898080E-04 | -1.509099E-02 |
| 21    | C16   | 1.333100E-02  | 6.137570E-03  | 1.627549E-03  |
| 22    | C17   | -1.655284E-02 | -9.413400E-03 | 8.281097E-03  |
| 23    | C18   | -2.099264E-02 | -9.634396E-03 | -4.550000E-03 |
| 24    | C19   | 1.119810E-02  | 6.856261E-03  | -8.067226E-03 |
| 25    | H16   | 4.778835E-03  | 6.395915E-04  | 1.815445E-03  |
| 26    | H17   | -2.269290E-03 | -3.734078E-04 | 2.039251E-03  |
| 27    | H18   | 1.898389E-03  | 2.441004E-03  | -7.736249E-04 |
| 28    | H19   | 4.019581E-03  | 1.995855E-03  | -3.556696E-03 |
| 29    | H20   | 5.225823E-04  | 1.660109E-03  | -3.684042E-03 |
| 30    | C1    | -1.526528E-04 | -1.293907E-03 | 5.029993E-03  |
| 31    | H5    | 3.804775E-03  | 3.806220E-04  | 3.734436E-04  |
| 32    | H6    | 1.802152E-04  | 1.858511E-03  | -4.200778E-03 |
| 33    | C3    | 1.062426E-02  | 8.644818E-03  | -1.207225E-02 |
| 34    | C26   | 1.147070E-02  | 1.162699E-02  | 1.033083E-02  |
| 35    | C27   | 4.957450E-03  | -1.858617E-04 | -2.536308E-02 |
| 36    | C28   | -9.660113E-03 | -1.041083E-02 | -8.949314E-03 |
| 37    | C29   | -5.181304E-03 | -1.111879E-03 | 2.398876E-02  |
| 38    | H1    | -3.259171E-04 | 1.476531E-03  | 1.312592E-02  |
| 39    | H2    | -4.697105E-03 | -3.791650E-03 | -6.595315E-03 |
| 40    | H3    | -5.870500E-04 | -1.164633E-03 | -1.251753E-02 |
| 41    | H9    | 4.371697E-03  | 4.237461E-03  | 6.763454E-03  |
| 42    | H10   | 1.379739E-03  | 7.800523E-04  | -2.571094E-03 |
| 43    | H25   | -3.342425E-04 | -4.287707E-04 | 6.210274E-04  |
| ----- |       |               |               |               |
|       | total | 8.991054E-04  | 6.732157E-04  | 4.943495E-05  |

end of program derlb

start of program geopt 4

geometry optimization step 4

reading input hessian of dimension 129

in five columns format

reading input hessian of dimension 129

in five columns format

\*\* restarting optimization from step 3 \*\*

Level shifts adjusted to satisfy step-size constraints

Step size: 0.3000460

Cos(theta): 0.3075896

Final level shift: -4.9937562E-03

energy change: 6.4258E-03 . ( 5.0000E-05 )

gradient maximum: 9.9076E-03 . ( 4.5000E-04 )

gradient rms: 2.3236E-03 . ( 3.0000E-04 )

step size: 0.29978 trust radius: 0.30000

displacement maximum: 1.5805E-01 . ( 1.8000E-03 )

displacement rms: 2.3553E-02 . ( 1.2000E-03 )  
 predicted energy change: -1.5876E-03 geom step: 2.9978E-  
 01 full step: 2.9978E-01  
 molecular structure not yet converged...

center of mass moved by:  
 x: -2.4980E-16 y: -3.4694E-17 z: -6.1062E-16

new geometry:

|      | angstroms     |               |               |
|------|---------------|---------------|---------------|
| atom | x             | y             | z             |
| N1   | -0.2605037549 | 0.4125439612  | 1.1900034197  |
| N2   | -1.0201882848 | -2.3117451892 | 1.2286465763  |
| C4   | -1.2291547382 | -0.0501813353 | 2.0213210471  |
| C5   | -0.0584840655 | -1.9323738777 | 0.5045877913  |
| C6   | -1.6433405541 | -1.3707651498 | 2.0724302477  |
| C7   | -1.7196322432 | 0.9707097685  | 2.8115399710  |
| C13  | 0.6123641543  | -2.9395135162 | -0.4045486213 |
| H4   | -3.0004875650 | -2.6843033639 | 3.0337672096  |
| C8   | -2.7502677659 | 0.6466074665  | 3.7128944205  |
| C11  | -0.9641692572 | 2.1368330189  | 2.4248916539  |
| H7   | -3.1870956384 | 1.3938929758  | 4.3523390576  |
| C9   | -3.1923609494 | -0.6577264470 | 3.7717764284  |
| H8   | -3.9791920871 | -0.9171763497 | 4.4577173169  |
| C10  | -2.6430824576 | -1.6735110866 | 2.9607130298  |
| C12  | -0.0894151548 | 1.7589272383  | 1.4540514090  |
| C2   | 0.8975931598  | 2.5804167511  | 0.7178403216  |
| H13  | 1.6900885460  | -2.9175445528 | -0.2351375024 |
| C14  | 0.3269913213  | -2.6769735270 | -1.8741990189 |
| H15  | 0.2546697460  | -3.9228910664 | -0.1143387386 |
| C15  | -0.2180137009 | -2.2191864228 | -4.5767173828 |
| C16  | 1.3496559462  | -2.4227648804 | -2.7664884238 |
| C17  | -0.9764471114 | -2.6992027704 | -2.3557447632 |
| C18  | -1.2462393835 | -2.4742543646 | -3.6931624843 |
| C19  | 1.0776231861  | -2.1937356607 | -4.1071135875 |
| H16  | 2.3658535888  | -2.4078532060 | -2.4199820995 |
| H17  | -1.7766859001 | -2.8933381124 | -1.6738564557 |
| H18  | -2.2487902734 | -2.4928964715 | -4.0444386495 |
| H19  | 1.8875121812  | -1.9993966839 | -4.7814773829 |
| H20  | -0.4271057620 | -2.0495195336 | -5.6159740449 |
| C1   | 0.5363502956  | -0.5262371704 | 0.4297996206  |
| H5   | 1.5569005697  | -0.5698600523 | 0.8077454585  |
| H6   | 0.5969268301  | -0.2400532601 | -0.6132951547 |
| C3   | 2.7366658910  | 4.1635728363  | -0.6570139302 |
| C26  | 1.8494198086  | 3.3298911691  | 1.4147477126  |
| C27  | 0.8738252674  | 2.6383115327  | -0.6774631325 |
| C28  | 1.7919425574  | 3.4195085202  | -1.3586689873 |
| C29  | 2.7597734096  | 4.1195096692  | 0.7311384976  |
| H1   | 1.8863612505  | 3.2798815381  | 2.4949515492  |
| H2   | 0.1256541849  | 2.0873284863  | -1.2299565889 |
| H3   | 1.7610423948  | 3.4526209625  | -2.4364084657 |
| H9   | 3.4896654651  | 4.6919589348  | 1.2854978074  |

|     |               |              |               |
|-----|---------------|--------------|---------------|
| H10 | 3.4478987066  | 4.7719686917 | -1.1860693938 |
| H25 | -1.0742926529 | 3.1373751310 | 2.7923517727  |

nuclear repulsion energy..... 1974.668059347 hartrees

-----  
/ end of geometry optimization iteration 4 /  
-----

end of program geopt

start of program onee  
smallest eigenvalue of S: 2.817E-04  
number of canonical orbitals..... 461  
end of program onee

start of program probe  
end of program probe

start of program grid

number of gridpoints:

|     | atom     | N1  | N2  | C4  | C5  | C6  | C7  | C13 |
|-----|----------|-----|-----|-----|-----|-----|-----|-----|
| H4  |          |     |     |     |     |     |     |     |
|     | grid # 1 | 97  | 102 | 87  | 88  | 90  | 88  | 84  |
| 73  |          |     |     |     |     |     |     |     |
|     | grid # 2 | 104 | 112 | 95  | 95  | 99  | 98  | 92  |
| 118 |          |     |     |     |     |     |     |     |
|     | grid # 3 | 214 | 227 | 195 | 186 | 191 | 200 | 164 |
| 224 |          |     |     |     |     |     |     |     |
|     | grid # 4 | 389 | 414 | 320 | 320 | 324 | 347 | 299 |
| 224 |          |     |     |     |     |     |     |     |

number of gridpoints:

|     | atom     | C8  | C11 | H7  | C9  | H8  | C10 | C12 |
|-----|----------|-----|-----|-----|-----|-----|-----|-----|
| C2  |          |     |     |     |     |     |     |     |
|     | grid # 1 | 89  | 86  | 73  | 87  | 73  | 89  | 84  |
| 92  |          |     |     |     |     |     |     |     |
|     | grid # 2 | 97  | 94  | 118 | 97  | 118 | 97  | 95  |
| 100 |          |     |     |     |     |     |     |     |
|     | grid # 3 | 184 | 185 | 223 | 184 | 222 | 184 | 195 |
| 196 |          |     |     |     |     |     |     |     |
|     | grid # 4 | 330 | 330 | 226 | 331 | 223 | 327 | 321 |
| 343 |          |     |     |     |     |     |     |     |

number of gridpoints:

|     | atom     | H13 | C14 | H15 | C15 | C16 | C17 | C18 |
|-----|----------|-----|-----|-----|-----|-----|-----|-----|
| C19 |          |     |     |     |     |     |     |     |
|     | grid # 1 | 69  | 91  | 69  | 89  | 88  | 86  | 89  |
| 87  |          |     |     |     |     |     |     |     |

|          |     |     |     |    |    |    |    |
|----------|-----|-----|-----|----|----|----|----|
| grid # 2 | 110 | 100 | 110 | 97 | 96 | 96 | 97 |
|----------|-----|-----|-----|----|----|----|----|

96

|          |     |     |     |     |     |     |     |
|----------|-----|-----|-----|-----|-----|-----|-----|
| grid # 3 | 210 | 196 | 218 | 182 | 183 | 183 | 183 |
|----------|-----|-----|-----|-----|-----|-----|-----|

182

|          |     |     |     |     |     |     |     |
|----------|-----|-----|-----|-----|-----|-----|-----|
| grid # 4 | 215 | 342 | 217 | 327 | 327 | 327 | 327 |
|----------|-----|-----|-----|-----|-----|-----|-----|

327

number of gridpoints:

|      |     |     |     |     |     |    |    |
|------|-----|-----|-----|-----|-----|----|----|
| atom | H16 | H17 | H18 | H19 | H20 | C1 | H5 |
|------|-----|-----|-----|-----|-----|----|----|

H6

|          |    |    |    |    |    |    |    |
|----------|----|----|----|----|----|----|----|
| grid # 1 | 73 | 73 | 73 | 73 | 73 | 82 | 70 |
|----------|----|----|----|----|----|----|----|

69

|          |     |     |     |     |     |    |     |
|----------|-----|-----|-----|-----|-----|----|-----|
| grid # 2 | 113 | 115 | 118 | 118 | 118 | 88 | 109 |
|----------|-----|-----|-----|-----|-----|----|-----|

105

|          |     |     |     |     |     |     |     |
|----------|-----|-----|-----|-----|-----|-----|-----|
| grid # 3 | 214 | 216 | 222 | 221 | 223 | 165 | 217 |
|----------|-----|-----|-----|-----|-----|-----|-----|

208

|          |     |     |     |     |     |     |     |
|----------|-----|-----|-----|-----|-----|-----|-----|
| grid # 4 | 213 | 214 | 223 | 222 | 224 | 290 | 217 |
|----------|-----|-----|-----|-----|-----|-----|-----|

206

number of gridpoints:

|      |    |     |     |     |     |    |    |
|------|----|-----|-----|-----|-----|----|----|
| atom | C3 | C26 | C27 | C28 | C29 | H1 | H2 |
|------|----|-----|-----|-----|-----|----|----|

H3

|          |    |    |    |    |    |    |    |
|----------|----|----|----|----|----|----|----|
| grid # 1 | 89 | 89 | 88 | 89 | 89 | 73 | 71 |
|----------|----|----|----|----|----|----|----|

73

|          |    |    |    |    |    |     |     |
|----------|----|----|----|----|----|-----|-----|
| grid # 2 | 97 | 95 | 96 | 97 | 97 | 115 | 114 |
|----------|----|----|----|----|----|-----|-----|

118

|          |     |     |     |     |     |     |     |
|----------|-----|-----|-----|-----|-----|-----|-----|
| grid # 3 | 185 | 182 | 185 | 184 | 184 | 218 | 216 |
|----------|-----|-----|-----|-----|-----|-----|-----|

223

|          |     |     |     |     |     |     |     |
|----------|-----|-----|-----|-----|-----|-----|-----|
| grid # 4 | 330 | 328 | 329 | 328 | 329 | 219 | 214 |
|----------|-----|-----|-----|-----|-----|-----|-----|

223

number of gridpoints:

|      |    |     |     |       |
|------|----|-----|-----|-------|
| atom | H9 | H10 | H25 | total |
|------|----|-----|-----|-------|

|          |     |     |     |       |
|----------|-----|-----|-----|-------|
| grid # 1 | 73  | 73  | 73  | 3516  |
| grid # 2 | 118 | 118 | 115 | 4495  |
| grid # 3 | 223 | 224 | 221 | 8642  |
| grid # 4 | 224 | 224 | 224 | 12258 |

end of program grid

start of program rwr  
end of program rwr

start of program scf

|   |   |   |   |   |              |               |                                          |
|---|---|---|---|---|--------------|---------------|------------------------------------------|
| i | u | d | i | g |              |               |                                          |
| t | p | i | c | r |              |               |                                          |
| e | d | i | u | i |              |               |                                          |
| r | t | s | t | d | total energy | energy change | RMS density change<br>maximum DIIS error |

|      |   |   |   |   |   |                  |         |         |         |
|------|---|---|---|---|---|------------------|---------|---------|---------|
| etot | 1 | N | N | 2 | U | -990.14145563547 |         | 7.8E-04 | 3.9E-02 |
| etot | 2 | Y | Y | 6 | M | -990.35861329482 | 2.2E-01 | 3.9E-04 | 1.6E-02 |
| etot | 3 | N | Y | 2 | U | -990.38809039062 | 2.9E-02 | 1.2E-04 | 3.9E-03 |
| etot | 4 | Y | Y | 6 | M | -990.38982038619 | 1.7E-03 | 4.1E-05 | 1.2E-03 |
| etot | 5 | Y | Y | 6 | M | -990.39009100052 | 2.7E-04 | 1.6E-05 | 3.2E-04 |
| etot | 6 | N | Y | 2 | U | -990.39013660923 | 4.6E-05 | 5.8E-06 | 1.0E-04 |
| etot | 7 | Y | Y | 6 | M | -990.39013977366 | 3.2E-06 | 2.4E-06 | 3.6E-05 |
| etot | 8 | Y | N | 6 | M | -990.39014043744 | 6.6E-07 | 0.0E+00 | 0.0E+00 |

Energy components, in hartrees:

|     |                               |                   |       |
|-----|-------------------------------|-------------------|-------|
| (A) | Nuclear repulsion.....        | 1974.66805934711  |       |
| (E) | Total one-electron terms..... | -5267.59739614095 |       |
| (I) | Total two-electron terms..... | 2302.53919635640  |       |
| (L) | Electronic energy.....        | -2965.05819978455 | (E+I) |
| (N) | Total energy.....             | -990.39014043744  | (A+L) |

SCFE: SCF energy: HF      -990.39014043744 hartrees      iterations:  
8

HOMO energy:      -0.26872  
LUMO energy:      0.09755

Orbital energies:

|           |           |           |           |           |           |
|-----------|-----------|-----------|-----------|-----------|-----------|
| -15.60449 | -15.56529 | -11.29607 | -11.28604 | -11.27093 | -11.25222 |
| -11.25039 | -11.24527 | -11.24459 | -11.24123 | -11.24070 | -11.24044 |
| -11.24005 | -11.23923 | -11.23844 | -11.23434 | -11.23294 | -11.23235 |
| -11.23098 | -11.22932 | -11.22452 | -11.21957 | -11.21815 | -11.21574 |
| -11.21231 | -1.32548  | -1.24923  | -1.16438  | -1.16096  | -1.13857  |
| -1.07363  | -1.06865  | -1.03835  | -1.02173  | -1.02055  | -1.01749  |
| -0.97069  | -0.95517  | -0.93360  | -0.86029  | -0.83635  | -0.83387  |
| -0.83017  | -0.80766  | -0.79576  | -0.76982  | -0.73217  | -0.71750  |
| -0.70155  | -0.70000  | -0.66622  | -0.65729  | -0.64350  | -0.63778  |
| -0.63371  | -0.62436  | -0.62014  | -0.61563  | -0.59577  | -0.59197  |
| -0.59045  | -0.58757  | -0.58039  | -0.55733  | -0.55239  | -0.54828  |
| -0.54513  | -0.51672  | -0.50646  | -0.50304  | -0.50031  | -0.49689  |
| -0.49432  | -0.49097  | -0.48728  | -0.48190  | -0.42913  | -0.40459  |
| -0.36595  | -0.34214  | -0.34166  | -0.33817  | -0.33118  | -0.28287  |
| -0.26872  | 0.09755   | 0.12906   | 0.13686   | 0.13760   | 0.14839   |
| 0.17922   | 0.20764   | 0.22771   | 0.23529   | 0.24258   |           |

end of program scf

start of program derla  
end of program derla

start of program rwr  
end of program rwr

start of program der1b

forces (hartrees/bohr) : total

| atom  | label | x             | y             | z             |
|-------|-------|---------------|---------------|---------------|
| 1     | N1    | 1.722647E-04  | -1.371273E-03 | -2.097232E-03 |
| 2     | N2    | 2.307619E-03  | 2.645434E-04  | -1.429536E-03 |
| 3     | C4    | 9.233719E-04  | -1.909727E-03 | -3.397651E-04 |
| 4     | C5    | -2.472205E-03 | -1.364835E-03 | 1.074612E-03  |
| 5     | C6    | 9.104396E-04  | -8.696098E-04 | -8.667630E-04 |
| 6     | C7    | -2.264358E-03 | 1.987665E-03  | 9.229630E-04  |
| 7     | C13   | 1.704094E-05  | -1.512183E-03 | 1.932501E-03  |
| 8     | H4    | -1.303564E-04 | -3.601330E-04 | 6.584231E-05  |
| 9     | C8    | -2.402673E-04 | -8.558610E-04 | 6.577247E-04  |
| 10    | C11   | 1.082298E-03  | 1.304216E-03  | 5.319032E-04  |
| 11    | H7    | 2.368012E-04  | 2.173179E-04  | -3.217904E-04 |
| 12    | C9    | 5.433283E-04  | 1.494368E-03  | -2.250984E-04 |
| 13    | H8    | -7.318402E-06 | 9.919423E-05  | 2.294528E-04  |
| 14    | C10   | -3.416522E-04 | -3.416849E-04 | 3.024806E-05  |
| 15    | C12   | 5.998397E-04  | 6.585509E-04  | 7.717878E-04  |
| 16    | C2    | 1.338325E-03  | 2.564232E-03  | 7.609119E-04  |
| 17    | H13   | -2.445629E-03 | 3.019296E-04  | -7.005633E-04 |
| 18    | C14   | -1.006014E-03 | -2.287806E-03 | 2.671755E-03  |
| 19    | H15   | 3.635537E-04  | 1.884244E-03  | -9.943853E-04 |
| 20    | C15   | 2.027062E-03  | 2.500076E-04  | -2.559217E-03 |
| 21    | C16   | 2.727088E-03  | 1.063025E-03  | -3.560983E-03 |
| 22    | C17   | -9.564304E-04 | -6.952268E-05 | -1.579709E-04 |
| 23    | C18   | 2.482024E-03  | -4.635361E-04 | 6.616306E-03  |
| 24    | C19   | 5.817905E-03  | 2.160421E-04  | -5.459483E-04 |
| 25    | H16   | 2.531985E-03  | 4.057878E-04  | 1.288178E-04  |
| 26    | H17   | -4.824063E-03 | -1.082739E-03 | 2.997523E-03  |
| 27    | H18   | -1.047403E-02 | -7.737787E-04 | -2.242630E-03 |
| 28    | H19   | 2.831240E-03  | 6.714518E-04  | -2.296848E-03 |
| 29    | H20   | 2.548070E-04  | 7.177312E-04  | -1.647014E-03 |
| 30    | C1    | 4.326349E-04  | 1.117342E-03  | 1.134530E-03  |
| 31    | H5    | 3.099164E-04  | 3.869422E-04  | -1.953429E-05 |
| 32    | H6    | -4.484517E-05 | 5.228931E-04  | 6.438714E-04  |
| 33    | C3    | -2.488043E-03 | -2.181722E-03 | 6.024058E-04  |
| 34    | C26   | -2.683586E-03 | -2.958448E-03 | 1.442213E-03  |
| 35    | C27   | 2.666601E-04  | -4.104175E-04 | 1.506358E-03  |
| 36    | C28   | 2.305602E-03  | 2.215407E-03  | 4.983410E-04  |
| 37    | C29   | 8.628620E-04  | 7.523044E-04  | -1.843323E-03 |
| 38    | H1    | -1.674844E-03 | -2.410790E-04 | -4.984929E-03 |
| 39    | H2    | 2.525584E-03  | 1.790540E-03  | 2.833707E-03  |
| 40    | H3    | 8.433839E-04  | 7.493248E-04  | 2.107534E-03  |
| 41    | H9    | -2.068308E-03 | -1.653712E-03 | -2.587104E-03 |
| 42    | H10   | 8.221141E-05  | 1.717202E-04  | -7.402267E-04 |
| 43    | H25   | -1.315526E-04 | -2.308952E-04 | -4.026906E-05 |
| total |       | 5.423385E-04  | 8.678193E-04  | -3.982191E-05 |



end of program der1b

start of program geopt 5

geometry optimization step 5

reading input hessian of dimension 129

in five columns format

reading input hessian of dimension 129

in five columns format

Level shifts adjusted to satisfy step-size constraints

Step size: 0.3001034

Cos(theta): 0.4746771

Final level shift: -1.8111015E-02

energy change: -3.4678E-04 . ( 5.0000E-05 )

gradient maximum: 1.0656E-02 . ( 4.5000E-04 )

gradient rms: 2.1734E-03 . ( 3.0000E-04 )

step size: 0.29956 trust radius: 0.30000

displacement maximum: 1.2495E-01 . ( 1.8000E-03 )

displacement rms: 2.3536E-02 . ( 1.2000E-03 )

predicted energy change: -2.7815E-03 geom step: 2.9956E-

01 full step: 2.9956E-01

molecular structure not yet converged...

center of mass moved by:

x: 8.1464E-03

y: 6.0566E-03

z: -8.7285E-03

new geometry:

|      | angstroms     |               |               |
|------|---------------|---------------|---------------|
| atom | x             | y             | z             |
| N1   | -0.2292024469 | 0.4427015271  | 1.1628880103  |
| N2   | -0.9782568628 | -2.2878207032 | 1.1779266582  |
| C4   | -1.2094337002 | -0.0303642055 | 1.9757531149  |
| C5   | -0.0161249279 | -1.9029247248 | 0.4674816553  |
| C6   | -1.6194223744 | -1.3523145475 | 2.0109279641  |
| C7   | -1.7211646352 | 0.9868621882  | 2.7632723068  |
| C13  | 0.6544591552  | -2.9143021590 | -0.4408657883 |
| H4   | -2.9999077625 | -2.6718770241 | 2.9344446436  |
| C8   | -2.7718199836 | 0.6572998838  | 3.6401084653  |
| C11  | -0.9491404552 | 2.1543222696  | 2.4120276559  |
| H7   | -3.2211900614 | 1.4029180697  | 4.2716980948  |
| C9   | -3.2132989134 | -0.6466971041 | 3.6786741679  |
| H8   | -4.0163262814 | -0.9105012423 | 4.3442732707  |
| C10  | -2.6416683415 | -1.6597368984 | 2.8743855662  |
| C12  | -0.0562922792 | 1.7860587709  | 1.4560571753  |
| C2   | 0.9488951143  | 2.6311226377  | 0.7701830808  |
| H13  | 1.7281674582  | -2.8468821058 | -0.3270846920 |

|     |               |               |               |
|-----|---------------|---------------|---------------|
| C14 | 0.2937960086  | -2.7261589105 | -1.9088007454 |
| H15 | 0.3445375745  | -3.8922911028 | -0.1088900635 |
| C15 | -0.4402906415 | -2.3952792758 | -4.5794029238 |
| C16 | 1.2395116030  | -2.3428910048 | -2.8630371971 |
| C17 | -1.0270889510 | -2.9533277298 | -2.3085099819 |
| C18 | -1.3921717180 | -2.7920309200 | -3.6337066705 |
| C19 | 0.8788052648  | -2.1725843519 | -4.1956505663 |
| H16 | 2.2638244085  | -2.1880678707 | -2.5683467508 |
| H17 | -1.7675239977 | -3.2630084538 | -1.5767242550 |
| H18 | -2.4257099259 | -2.9929594166 | -3.9302355350 |
| H19 | 1.6217050002  | -1.8773108746 | -4.9256653884 |
| H20 | -0.7280733175 | -2.2675932286 | -5.6111620858 |
| C1  | 0.5821138301  | -0.4915229124 | 0.4118188533  |
| H5  | 1.5989978845  | -0.5325329495 | 0.8024327801  |
| H6  | 0.6562234427  | -0.2012124645 | -0.6287278123 |
| C3  | 2.8551861345  | 4.2505727705  | -0.4749461088 |
| C26 | 1.7771405951  | 3.4522098043  | 1.5201834275  |
| C27 | 1.0866007330  | 2.6404146539  | -0.6152847579 |
| C28 | 2.0341472297  | 3.4391158849  | -1.2329113044 |
| C29 | 2.7192766740  | 4.2587160999  | 0.9026633710  |
| H1  | 1.6846480152  | 3.4442277353  | 2.5858043452  |
| H2  | 0.4363216332  | 2.0366757013  | -1.2116377193 |
| H3  | 2.1295952060  | 3.4333746931  | -2.3030217836 |
| H9  | 3.3514260736  | 4.8860237979  | 1.4956835722  |
| H10 | 3.5921450310  | 4.8707133033  | -0.9544874007 |
| H25 | -1.0689547267 | 3.1499012113  | 2.7877233660  |

nuclear repulsion energy..... 1967.972340116 hartrees

/ end of geometry optimization iteration 5 /

end of program geopt

start of program onee

smallest eigenvalue of S: 2.829E-04

number of canonical orbitals..... 461

end of program onee

start of program probe

end of program probe

start of program grid

number of gridpoints:

|    | atom     | N1 | N2  | C4 | C5 | C6 | C7 | C13 |
|----|----------|----|-----|----|----|----|----|-----|
| H4 |          |    |     |    |    |    |    |     |
|    | grid # 1 | 95 | 102 | 87 | 88 | 90 | 90 | 84  |

73

|          |     |     |     |     |     |     |     |
|----------|-----|-----|-----|-----|-----|-----|-----|
| grid # 2 | 103 | 112 | 95  | 95  | 99  | 98  | 92  |
| 118      |     |     |     |     |     |     |     |
| grid # 3 | 212 | 227 | 195 | 188 | 190 | 199 | 163 |
| 224      |     |     |     |     |     |     |     |
| grid # 4 | 386 | 413 | 321 | 320 | 321 | 348 | 300 |
| 224      |     |     |     |     |     |     |     |

|                       |     |     |     |     |     |     |     |
|-----------------------|-----|-----|-----|-----|-----|-----|-----|
| number of gridpoints: |     |     |     |     |     |     |     |
| atom                  | C8  | C11 | H7  | C9  | H8  | C10 | C12 |
| C2                    |     |     |     |     |     |     |     |
| grid # 1              | 89  | 87  | 73  | 87  | 73  | 89  | 86  |
| 92                    |     |     |     |     |     |     |     |
| grid # 2              | 97  | 94  | 118 | 97  | 118 | 97  | 95  |
| 100                   |     |     |     |     |     |     |     |
| grid # 3              | 184 | 185 | 223 | 184 | 222 | 184 | 195 |
| 195                   |     |     |     |     |     |     |     |
| grid # 4              | 328 | 330 | 226 | 331 | 223 | 327 | 320 |
| 340                   |     |     |     |     |     |     |     |

|                       |     |     |     |     |     |     |     |
|-----------------------|-----|-----|-----|-----|-----|-----|-----|
| number of gridpoints: |     |     |     |     |     |     |     |
| atom                  | H13 | C14 | H15 | C15 | C16 | C17 | C18 |
| C19                   |     |     |     |     |     |     |     |
| grid # 1              | 69  | 93  | 69  | 89  | 88  | 88  | 89  |
| 89                    |     |     |     |     |     |     |     |
| grid # 2              | 109 | 100 | 110 | 97  | 96  | 96  | 97  |
| 96                    |     |     |     |     |     |     |     |
| grid # 3              | 211 | 198 | 213 | 185 | 185 | 184 | 185 |
| 184                   |     |     |     |     |     |     |     |
| grid # 4              | 210 | 342 | 212 | 330 | 329 | 328 | 329 |
| 329                   |     |     |     |     |     |     |     |

|                       |     |     |     |     |     |     |     |
|-----------------------|-----|-----|-----|-----|-----|-----|-----|
| number of gridpoints: |     |     |     |     |     |     |     |
| atom                  | H16 | H17 | H18 | H19 | H20 | C1  | H5  |
| H6                    |     |     |     |     |     |     |     |
| grid # 1              | 72  | 72  | 73  | 73  | 73  | 82  | 70  |
| 69                    |     |     |     |     |     |     |     |
| grid # 2              | 115 | 114 | 118 | 118 | 118 | 88  | 110 |
| 104                   |     |     |     |     |     |     |     |
| grid # 3              | 214 | 215 | 223 | 222 | 224 | 163 | 217 |
| 206                   |     |     |     |     |     |     |     |
| grid # 4              | 214 | 215 | 232 | 223 | 224 | 292 | 217 |
| 204                   |     |     |     |     |     |     |     |

|                       |     |     |     |     |     |     |     |
|-----------------------|-----|-----|-----|-----|-----|-----|-----|
| number of gridpoints: |     |     |     |     |     |     |     |
| atom                  | C3  | C26 | C27 | C28 | C29 | H1  | H2  |
| H3                    |     |     |     |     |     |     |     |
| grid # 1              | 89  | 87  | 88  | 89  | 89  | 72  | 70  |
| 73                    |     |     |     |     |     |     |     |
| grid # 2              | 97  | 95  | 96  | 97  | 97  | 115 | 113 |
| 118                   |     |     |     |     |     |     |     |
| grid # 3              | 184 | 182 | 184 | 184 | 185 | 217 | 213 |
| 222                   |     |     |     |     |     |     |     |

```

grid # 4      328      327      329      327      328      215      211
224

```

number of gridpoints:

| atom     | H9  | H10 | H25 | total |
|----------|-----|-----|-----|-------|
| grid # 1 | 73  | 73  | 72  | 3518  |
| grid # 2 | 118 | 118 | 115 | 4493  |
| grid # 3 | 222 | 223 | 219 | 8634  |
| grid # 4 | 224 | 224 | 223 | 12248 |

end of program grid

start of program rwr  
end of program rwr

start of program scf

|      | i | u | d | i | g |                  |          | RMS     | maximum |
|------|---|---|---|---|---|------------------|----------|---------|---------|
|      | t | p | i | c | r |                  |          | density | DIIS    |
|      | e | d | i | u | i |                  | energy   | change  | error   |
|      | r | t | s | t | d | total energy     | change   |         |         |
| etot | 1 | N | N | 2 | U | -990.30892225319 |          | 4.4E-04 | 2.7E-02 |
| etot | 2 | Y | Y | 6 | M | -990.37951017403 | 7.1E-02  | 2.2E-04 | 1.1E-02 |
| etot | 3 | N | Y | 2 | U | -990.38894674829 | 9.4E-03  | 6.5E-05 | 2.8E-03 |
| etot | 4 | Y | Y | 6 | M | -990.38948696771 | 5.4E-04  | 2.2E-05 | 8.5E-04 |
| etot | 5 | Y | Y | 6 | M | -990.38957252266 | 8.6E-05  | 9.0E-06 | 2.1E-04 |
| etot | 6 | N | Y | 2 | U | -990.38957720340 | 4.7E-06  | 3.0E-06 | 4.3E-05 |
| etot | 7 | Y | N | 6 | M | -990.38957709405 | -1.1E-07 | 0.0E+00 | 0.0E+00 |

Energy components, in hartrees:

|     |                               |                   |       |
|-----|-------------------------------|-------------------|-------|
| (A) | Nuclear repulsion.....        | 1967.97234011558  |       |
| (E) | Total one-electron terms..... | -5254.19895519368 |       |
| (I) | Total two-electron terms..... | 2295.83703798405  |       |
| (L) | Electronic energy.....        | -2958.36191720963 | (E+I) |
| (N) | Total energy.....             | -990.38957709405  | (A+L) |

SCFE: SCF energy: HF -990.38957709405 hartrees iterations:  
7

HOMO energy: -0.26884  
LUMO energy: 0.09597

Orbital energies:

|           |           |           |           |           |           |
|-----------|-----------|-----------|-----------|-----------|-----------|
| -15.60543 | -15.56487 | -11.29622 | -11.28765 | -11.27212 | -11.25108 |
| -11.25053 | -11.24792 | -11.24652 | -11.23892 | -11.23891 | -11.23883 |
| -11.23801 | -11.23777 | -11.23716 | -11.23711 | -11.23637 | -11.23587 |
| -11.23553 | -11.23260 | -11.22496 | -11.22078 | -11.21925 | -11.21651 |

|           |          |          |          |          |          |
|-----------|----------|----------|----------|----------|----------|
| -11.21329 | -1.32543 | -1.25168 | -1.16443 | -1.15738 | -1.13804 |
| -1.07535  | -1.06529 | -1.04001 | -1.02194 | -1.01727 | -1.01663 |
| -0.97152  | -0.95322 | -0.93415 | -0.85977 | -0.83914 | -0.83253 |
| -0.82686  | -0.80677 | -0.79549 | -0.77050 | -0.73321 | -0.71759 |
| -0.70203  | -0.69559 | -0.66640 | -0.65820 | -0.64265 | -0.63725 |
| -0.63362  | -0.62320 | -0.62133 | -0.61564 | -0.59719 | -0.59253 |
| -0.59025  | -0.58763 | -0.57566 | -0.55800 | -0.55276 | -0.54852 |
| -0.54404  | -0.51815 | -0.50817 | -0.50261 | -0.50009 | -0.49525 |
| -0.49276  | -0.49132 | -0.48786 | -0.48039 | -0.42993 | -0.40500 |
| -0.36914  | -0.34440 | -0.34069 | -0.33787 | -0.32708 | -0.28199 |
| -0.26884  | 0.09597  | 0.12827  | 0.13658  | 0.13747  | 0.14798  |
| 0.17910   | 0.21010  | 0.22715  | 0.23493  | 0.24011  |          |

end of program scf

start of program derla  
end of program derla

start of program rwr  
end of program rwr

start of program der1b

forces (hartrees/bohr) : total

| atom | label | x             | y             | z             |
|------|-------|---------------|---------------|---------------|
| ---- | ----- | -----         | -----         | -----         |
| 1    | N1    | 1.630734E-03  | 4.147837E-04  | -2.328007E-04 |
| 2    | N2    | -4.394325E-03 | -1.352038E-03 | 2.472753E-03  |
| 3    | C4    | -1.011245E-03 | 1.568492E-03  | 3.045752E-05  |
| 4    | C5    | 4.998187E-03  | 1.221166E-03  | -4.075432E-03 |
| 5    | C6    | -2.039398E-03 | -4.311267E-04 | 1.780415E-03  |
| 6    | C7    | 6.101085E-05  | -2.060345E-04 | 7.720866E-04  |
| 7    | C13   | 4.203179E-04  | 3.755701E-03  | -3.272974E-03 |
| 8    | H4    | 5.925810E-05  | 2.078679E-04  | 8.546451E-05  |
| 9    | C8    | 1.534280E-03  | -1.965932E-04 | -1.082552E-03 |
| 10   | C11   | -1.931759E-03 | -9.908874E-04 | 6.215361E-04  |
| 11   | H7    | -1.775814E-04 | 1.464387E-04  | 1.739668E-04  |
| 12   | C9    | 7.213503E-04  | -1.263375E-03 | -1.016812E-03 |
| 13   | H8    | 1.282530E-04  | -1.587411E-04 | 7.876069E-06  |
| 14   | C10   | -2.470540E-04 | 1.260490E-03  | 7.692993E-04  |
| 15   | C12   | 1.453405E-03  | 1.325890E-03  | -3.933628E-03 |
| 16   | C2    | -1.019141E-03 | -2.748754E-03 | -8.869362E-04 |
| 17   | H13   | 4.139215E-03  | 1.790964E-04  | 9.518011E-04  |
| 18   | C14   | -1.890313E-03 | 5.889275E-04  | -2.220388E-03 |
| 19   | H15   | -5.789694E-04 | -2.664568E-03 | 1.096563E-03  |
| 20   | C15   | -1.086856E-03 | -8.299807E-04 | 2.186525E-03  |
| 21   | C16   | -5.200446E-03 | -1.943274E-03 | 4.012439E-03  |
| 22   | C17   | 1.011256E-03  | -1.508706E-04 | 6.361840E-04  |

|       |       |               |               |               |
|-------|-------|---------------|---------------|---------------|
| 23    | C18   | -3.123879E-03 | -7.158290E-04 | -6.583892E-03 |
| 24    | C19   | -7.063939E-03 | -2.062728E-03 | 8.090705E-04  |
| 25    | H16   | -2.103718E-04 | 4.707942E-04  | 8.553744E-04  |
| 26    | H17   | 5.839874E-03  | 2.613085E-03  | -4.175018E-03 |
| 27    | H18   | 1.242488E-02  | 3.786442E-03  | 1.561713E-03  |
| 28    | H19   | -3.859295E-03 | -1.242690E-03 | 3.275097E-03  |
| 29    | H20   | 2.965080E-04  | -4.598800E-04 | 1.965477E-03  |
| 30    | C1    | 1.066212E-04  | -1.197430E-03 | 2.415771E-04  |
| 31    | H5    | -6.245271E-04 | -2.326934E-04 | 4.699059E-05  |
| 32    | H6    | -9.647908E-05 | 1.200227E-04  | 3.096240E-06  |
| 33    | C3    | 2.194370E-03  | 2.154896E-03  | 1.522594E-03  |
| 34    | C26   | 2.819150E-03  | 2.857859E-03  | -7.306075E-04 |
| 35    | C27   | -1.348596E-04 | -3.131549E-04 | -4.776516E-04 |
| 36    | C28   | -2.416145E-03 | -2.441204E-03 | -9.400507E-04 |
| 37    | C29   | -1.201260E-03 | -6.874415E-04 | 9.218558E-06  |
| 38    | H1    | 7.430163E-04  | 7.420055E-04  | 4.313428E-03  |
| 39    | H2    | -2.921308E-03 | -2.500431E-03 | -3.182915E-03 |
| 40    | H3    | -1.090762E-03 | -7.223903E-04 | -1.231965E-03 |
| 41    | H9    | 2.552610E-03  | 2.455616E-03  | 3.038091E-03  |
| 42    | H10   | 7.688328E-05  | 2.110463E-04  | 6.463850E-04  |
| 43    | H25   | 1.247264E-05  | 2.472986E-04  | 8.043307E-05  |
| ----- |       |               |               |               |
|       | total | 9.037392E-04  | 8.158031E-04  | -7.771103E-05 |

end of program derlb

start of program geopt 6

geometry optimization step 6

reading input hessian of dimension 129

in five columns format

reading input hessian of dimension 129

in five columns format

Level shifts adjusted to satisfy step-size constraints

Step size: 0.3005785

Cos(theta): 0.4030506

Final level shift: -1.2859045E-02

energy change: 5.6334E-04 . ( 5.0000E-05 )

gradient maximum: 1.2826E-02 . ( 4.5000E-04 )

gradient rms: 2.6475E-03 . ( 3.0000E-04 )

step size: 0.30039 trust radius: 0.30000

displacement maximum: 1.4866E-01 . ( 1.8000E-03 )

displacement rms: 2.3601E-02 . ( 1.2000E-03 )

predicted energy change: -2.6208E-03 geom step: 3.0039E-

01 full step: 3.0039E-01

molecular structure not yet converged...

center of mass moved by:

x: -7.0070E-03 y: 3.1695E-03 z: -3.9849E-03

new geometry:

|      | angstroms     |               |               |
|------|---------------|---------------|---------------|
| atom | x             | y             | z             |
| N1   | -0.2431388835 | 0.4556736239  | 1.1723735471  |
| N2   | -1.0052221025 | -2.2638064326 | 1.1711775865  |
| C4   | -1.2354149005 | -0.0068382249 | 1.9686217617  |
| C5   | -0.0219368988 | -1.8840112724 | 0.4769055945  |
| C6   | -1.6547168498 | -1.3251930492 | 1.9985456785  |
| C7   | -1.7404984224 | 1.0066322943  | 2.7505185979  |
| C13  | 0.6709126692  | -2.8977538263 | -0.4172186213 |
| H4   | -3.0356419670 | -2.6439761971 | 2.9042709974  |
| C8   | -2.7930706857 | 0.6804961350  | 3.6197611198  |
| C11  | -0.9650101197 | 2.1686595222  | 2.4024960703  |
| H7   | -3.2425652691 | 1.4227454725  | 4.2536593268  |
| C9   | -3.2422765659 | -0.6233719281 | 3.6535786031  |
| H8   | -4.0458719809 | -0.8841748627 | 4.3157805202  |
| C10  | -2.6766502685 | -1.6346558742 | 2.8502873309  |
| C12  | -0.0710715297 | 1.7970748741  | 1.4546947917  |
| C2   | 0.9503376395  | 2.6145402001  | 0.7646068978  |
| H13  | 1.7459317870  | -2.8218826796 | -0.2973025660 |
| C14  | 0.3175412762  | -2.7210862854 | -1.8808548888 |
| H15  | 0.3721363370  | -3.8731171893 | -0.0645970713 |
| C15  | -0.4054882560 | -2.4055350093 | -4.5510673450 |
| C16  | 1.2049840844  | -2.1961843098 | -2.8003720449 |
| C17  | -0.9385119890 | -3.0863025612 | -2.3151953733 |
| C18  | -1.2985482642 | -2.9334100012 | -3.6363835117 |
| C19  | 0.8468309784  | -2.0394783637 | -4.1317416864 |
| H16  | 2.1814549757  | -1.8985296468 | -2.4799685659 |
| H17  | -1.6351318329 | -3.4951433926 | -1.6093012692 |
| H18  | -2.2805077802 | -3.2390864388 | -3.9568211189 |
| H19  | 1.5442219641  | -1.6284067831 | -4.8322649240 |
| H20  | -0.6918667664 | -2.2895583892 | -5.5817584789 |
| C1   | 0.5775477845  | -0.4792363854 | 0.4348181138  |
| H5   | 1.5772891761  | -0.5317014840 | 0.8498355316  |
| H6   | 0.6798600143  | -0.1840634649 | -0.5932120927 |
| C3   | 2.8710077594  | 4.1851297153  | -0.5136427992 |
| C26  | 1.9198910499  | 3.2990087678  | 1.5101069134  |
| C27  | 0.9496482049  | 2.7305127321  | -0.6306199707 |
| C28  | 1.9063251470  | 3.5077111519  | -1.2645504751 |
| C29  | 2.8739200353  | 4.0827381339  | 0.8755772877  |
| H1   | 1.9381200101  | 3.2016452634  | 2.5905377595  |
| H2   | 0.1888699186  | 2.2286821548  | -1.2204008413 |
| H3   | 1.8906486427  | 3.5909148714  | -2.3446780704 |
| H9   | 3.6213149051  | 4.5998757976  | 1.4699197044  |
| H10  | 3.6131544908  | 4.7887646367  | -1.0058448436 |
| H25  | -1.0749029726 | 3.1646160247  | 2.7777097600  |

nuclear repulsion energy..... 1972.328492632 hartrees

-----

/ end of geometry optimization iteration 6 /

-----  
end of program geopt

start of program onee  
smallest eigenvalue of S: 2.771E-04  
number of canonical orbitals..... 461  
end of program onee

start of program probe  
end of program probe

start of program grid

number of gridpoints:

| atom     | N1  | N2  | C4  | C5  | C6  | C7  | C13 |
|----------|-----|-----|-----|-----|-----|-----|-----|
| H4       |     |     |     |     |     |     |     |
| grid # 1 | 95  | 102 | 85  | 88  | 89  | 88  | 84  |
| 73       |     |     |     |     |     |     |     |
| grid # 2 | 103 | 112 | 95  | 95  | 97  | 96  | 92  |
| 118      |     |     |     |     |     |     |     |
| grid # 3 | 212 | 227 | 194 | 188 | 190 | 198 | 164 |
| 224      |     |     |     |     |     |     |     |
| grid # 4 | 387 | 415 | 320 | 320 | 327 | 345 | 300 |
| 223      |     |     |     |     |     |     |     |

number of gridpoints:

| atom     | C8  | C11 | H7  | C9  | H8  | C10 | C12 |
|----------|-----|-----|-----|-----|-----|-----|-----|
| C2       |     |     |     |     |     |     |     |
| grid # 1 | 89  | 86  | 73  | 87  | 73  | 89  | 86  |
| 92       |     |     |     |     |     |     |     |
| grid # 2 | 97  | 94  | 118 | 97  | 118 | 97  | 94  |
| 100      |     |     |     |     |     |     |     |
| grid # 3 | 184 | 185 | 223 | 184 | 222 | 184 | 193 |
| 196      |     |     |     |     |     |     |     |
| grid # 4 | 330 | 330 | 226 | 329 | 223 | 326 | 316 |
| 343      |     |     |     |     |     |     |     |

number of gridpoints:

| atom     | H13 | C14 | H15 | C15 | C16 | C17 | C18 |
|----------|-----|-----|-----|-----|-----|-----|-----|
| C19      |     |     |     |     |     |     |     |
| grid # 1 | 69  | 93  | 69  | 89  | 88  | 87  | 89  |
| 89       |     |     |     |     |     |     |     |
| grid # 2 | 110 | 101 | 109 | 97  | 96  | 96  | 97  |
| 96       |     |     |     |     |     |     |     |
| grid # 3 | 211 | 191 | 213 | 182 | 183 | 182 | 184 |
| 182      |     |     |     |     |     |     |     |



|          |     |     |     |     |     |     |     |
|----------|-----|-----|-----|-----|-----|-----|-----|
| grid # 4 | 213 | 338 | 212 | 327 | 327 | 327 | 327 |
|----------|-----|-----|-----|-----|-----|-----|-----|

number of gridpoints:

|          |     |     |     |     |     |     |     |
|----------|-----|-----|-----|-----|-----|-----|-----|
| atom     | H16 | H17 | H18 | H19 | H20 | C1  | H5  |
| grid # 1 | 72  | 72  | 73  | 73  | 73  | 82  | 70  |
| grid # 2 | 113 | 115 | 118 | 118 | 118 | 87  | 108 |
| grid # 3 | 214 | 215 | 222 | 221 | 222 | 162 | 217 |
| grid # 4 | 214 | 215 | 224 | 223 | 224 | 290 | 215 |

number of gridpoints:

|          |     |     |     |     |     |     |     |
|----------|-----|-----|-----|-----|-----|-----|-----|
| atom     | C3  | C26 | C27 | C28 | C29 | H1  | H2  |
| grid # 1 | 89  | 89  | 88  | 89  | 89  | 73  | 71  |
| grid # 2 | 97  | 95  | 96  | 97  | 97  | 115 | 115 |
| grid # 3 | 186 | 184 | 185 | 185 | 185 | 218 | 218 |
| grid # 4 | 331 | 328 | 330 | 328 | 329 | 219 | 215 |

number of gridpoints:

|          |     |     |     |       |
|----------|-----|-----|-----|-------|
| atom     | H9  | H10 | H25 | total |
| grid # 1 | 73  | 73  | 73  | 3516  |
| grid # 2 | 118 | 118 | 115 | 4486  |
| grid # 3 | 223 | 224 | 221 | 8628  |
| grid # 4 | 224 | 224 | 224 | 12242 |

end of program grid

start of program rwr  
end of program rwr

start of program scf

|      | i | u | d | i | g |                  |         | RMS     | maximum |
|------|---|---|---|---|---|------------------|---------|---------|---------|
|      | t | p | i | c | r |                  |         | density | DIIS    |
|      | e | d | i | u | i |                  | energy  | change  | error   |
|      | r | t | s | t | d | total energy     | change  |         |         |
| etot | 1 | N | N | 2 | U | -990.31135910434 |         | 4.3E-04 | 4.0E-02 |
| etot | 2 | Y | Y | 6 | M | -990.37781182905 | 6.6E-02 | 2.3E-04 | 1.6E-02 |
| etot | 3 | N | Y | 2 | U | -990.38806340056 | 1.0E-02 | 6.8E-05 | 3.7E-03 |
| etot | 4 | Y | Y | 6 | M | -990.38873042054 | 6.7E-04 | 2.3E-05 | 1.0E-03 |

|      |   |   |   |   |   |                  |         |         |         |
|------|---|---|---|---|---|------------------|---------|---------|---------|
| etot | 5 | Y | Y | 6 | M | -990.38880803844 | 7.8E-05 | 9.7E-06 | 2.1E-04 |
| etot | 6 | N | Y | 2 | U | -990.38880825493 | 2.2E-07 | 3.3E-06 | 4.7E-05 |
| etot | 7 | Y | N | 6 | M | -990.38881016479 | 1.9E-06 | 0.0E+00 | 0.0E+00 |

Energy components, in hartrees:

|     |                               |                   |       |
|-----|-------------------------------|-------------------|-------|
| (A) | Nuclear repulsion.....        | 1972.32849263240  |       |
| (E) | Total one-electron terms..... | -5262.93232379671 |       |
| (I) | Total two-electron terms..... | 2300.21502099953  |       |
| (L) | Electronic energy.....        | -2962.71730279719 | (E+I) |
| (N) | Total energy.....             | -990.38881016479  | (A+L) |

SCFE: SCF energy: HF      -990.38881016479 hartrees      iterations:  
7

HOMO energy:      -0.26932  
LUMO energy:      0.09840

Orbital energies:

|           |           |           |           |           |           |
|-----------|-----------|-----------|-----------|-----------|-----------|
| -15.60367 | -15.56424 | -11.29601 | -11.28477 | -11.26958 | -11.25339 |
| -11.24904 | -11.24380 | -11.24330 | -11.24251 | -11.24217 | -11.24206 |
| -11.24138 | -11.24062 | -11.23899 | -11.23339 | -11.23226 | -11.23184 |
| -11.22993 | -11.22656 | -11.22352 | -11.21808 | -11.21636 | -11.21470 |
| -11.21091 | -1.32713  | -1.24880  | -1.16550  | -1.15964  | -1.13970  |
| -1.07482  | -1.06839  | -1.03820  | -1.02143  | -1.02048  | -1.01816  |
| -0.97093  | -0.95526  | -0.93500  | -0.86046  | -0.83462  | -0.83327  |
| -0.83082  | -0.80788  | -0.79619  | -0.76992  | -0.73305  | -0.71766  |
| -0.70058  | -0.69957  | -0.66673  | -0.65810  | -0.64423  | -0.63655  |
| -0.63289  | -0.62318  | -0.62001  | -0.61738  | -0.59598  | -0.59206  |
| -0.59102  | -0.58737  | -0.58058  | -0.55931  | -0.55282  | -0.54918  |
| -0.54135  | -0.51709  | -0.50650  | -0.50245  | -0.50066  | -0.49748  |
| -0.49337  | -0.49087  | -0.48836  | -0.48092  | -0.42887  | -0.40467  |
| -0.36567  | -0.34214  | -0.34177  | -0.33713  | -0.33161  | -0.28300  |
| -0.26932  | 0.09840   | 0.12812   | 0.13581   | 0.14035   | 0.14932   |
| 0.17951   | 0.20872   | 0.22741   | 0.23483   | 0.24185   |           |

end of program scf

start of program derla  
end of program derla

start of program rwr  
end of program rwr

start of program derlb

forces (hartrees/bohr) : total

| atom  | label | x             | y             | z             |
|-------|-------|---------------|---------------|---------------|
| 1     | N1    | 2.996888E-03  | -1.092300E-03 | -5.075419E-03 |
| 2     | N2    | 2.902098E-03  | 9.995089E-05  | -2.104699E-03 |
| 3     | C4    | 5.384872E-04  | -5.237104E-03 | -1.331028E-03 |
| 4     | C5    | -2.465605E-03 | -1.986060E-03 | 6.611523E-04  |
| 5     | C6    | 4.699496E-03  | -2.649344E-03 | -4.655830E-03 |
| 6     | C7    | -3.021900E-03 | 4.173873E-03  | 3.348288E-03  |
| 7     | C13   | 1.016495E-03  | 3.817286E-03  | 3.204766E-03  |
| 8     | H4    | -8.333256E-04 | -1.623874E-03 | 3.098643E-04  |
| 9     | C8    | -2.602591E-03 | -3.503070E-03 | 1.654229E-03  |
| 10    | C11   | -1.632059E-03 | 4.019113E-03  | 2.604804E-03  |
| 11    | H7    | -3.480026E-04 | 8.474685E-04  | 4.877169E-04  |
| 12    | C9    | 2.348395E-04  | 3.465178E-03  | 6.491069E-04  |
| 13    | H8    | -1.358836E-03 | -2.713855E-04 | 1.230370E-03  |
| 14    | C10   | -2.396643E-03 | 4.501606E-04  | 2.552408E-03  |
| 15    | C12   | 4.320330E-03  | -4.826731E-04 | -1.817665E-03 |
| 16    | C2    | 4.569580E-03  | 4.725283E-03  | -7.136536E-05 |
| 17    | H13   | 2.265698E-03  | 1.215287E-03  | 1.281866E-03  |
| 18    | C14   | 4.469088E-03  | 5.048013E-04  | 5.703955E-03  |
| 19    | H15   | -8.762473E-04 | -2.464998E-03 | -1.072243E-03 |
| 20    | C15   | -8.066367E-03 | -2.185489E-03 | -6.728433E-03 |
| 21    | C16   | 3.580633E-03  | 2.454246E-03  | -1.704632E-03 |
| 22    | C17   | -1.006307E-02 | -3.935131E-03 | -1.505949E-03 |
| 23    | C18   | -8.697968E-03 | -3.668085E-03 | -2.236322E-03 |
| 24    | C19   | 7.507799E-03  | 2.895454E-03  | 4.149845E-03  |
| 25    | H16   | 5.818461E-03  | 8.205617E-04  | 1.129787E-03  |
| 26    | H17   | -2.640653E-03 | -8.339735E-04 | 1.123124E-03  |
| 27    | H18   | 3.887211E-04  | 9.312185E-04  | 7.660585E-05  |
| 28    | H19   | 3.923565E-03  | 1.582982E-03  | -1.724279E-03 |
| 29    | H20   | 2.529764E-05  | 3.214141E-05  | 1.544815E-05  |
| 30    | C1    | -2.579334E-03 | -1.237971E-03 | 4.679537E-03  |
| 31    | H5    | 3.899026E-03  | 3.218813E-04  | 1.595166E-03  |
| 32    | H6    | 1.944755E-04  | 2.244129E-03  | -6.101903E-03 |
| 33    | C3    | -4.312188E-03 | -3.167459E-03 | 1.263702E-03  |
| 34    | C26   | -3.044044E-03 | -3.147202E-03 | -9.892063E-05 |
| 35    | C27   | -2.661653E-04 | -6.060645E-04 | 2.329980E-03  |
| 36    | C28   | 4.226828E-03  | 3.422783E-03  | 1.485505E-03  |
| 37    | C29   | 3.350305E-04  | -9.021500E-06 | -3.264345E-03 |
| 38    | H1    | -2.026984E-03 | -3.716618E-06 | -7.193914E-03 |
| 39    | H2    | 4.612104E-03  | 2.770042E-03  | 5.079830E-03  |
| 40    | H3    | 1.355729E-03  | 4.917203E-04  | 5.686416E-03  |
| 41    | H9    | -4.759377E-03 | -2.903258E-03 | -5.357919E-03 |
| 42    | H10   | -3.207912E-04 | -1.602736E-04 | -6.972213E-04 |
| 43    | H25   | -5.459823E-04 | 8.909836E-04  | 6.012465E-04  |
| total |       | 1.022540E-03  | 1.008090E-03  | 1.626298E-04  |

end of program der1b

start of program geopt 7

geometry optimization step 7

reading input hessian of dimension 129  
in five columns format  
reading input hessian of dimension 129  
in five columns format  
reading input hessian of dimension 129  
in five columns format

Level shifts adjusted to satisfy step-size constraints

Step size: 0.3001756

Cos(theta): 0.3481846

Final level shift: -5.8225096E-03

energy change: 7.6693E-04 . ( 5.0000E-05 )  
gradient maximum: 1.7603E-02 . ( 4.5000E-04 )  
gradient rms: 3.4045E-03 . ( 3.0000E-04 )  
step size: 0.29981 trust radius: 0.30000  
displacement maximum: 1.6540E-01 . ( 1.8000E-03 )  
displacement rms: 2.3556E-02 . ( 1.2000E-03 )  
predicted energy change: -2.5296E-03 geom step: 2.9981E-  
01 full step: 2.9981E-01  
molecular structure not yet converged...

center of mass moved by:

x: -3.4490E-03 y: -8.1566E-03 z: 4.8314E-03

new geometry:

|      | angstroms     |               |               |
|------|---------------|---------------|---------------|
| atom | x             | y             | z             |
| N1   | -0.2623089590 | 0.4311251804  | 1.1716991713  |
| N2   | -1.0180143788 | -2.2950059180 | 1.2042298173  |
| C4   | -1.2360309063 | -0.0332939736 | 1.9960257998  |
| C5   | -0.0491760452 | -1.9161106272 | 0.4898652496  |
| C6   | -1.6476617970 | -1.3546394568 | 2.0462415395  |
| C7   | -1.7230911186 | 0.9831467707  | 2.7922374034  |
| C13  | 0.6280306553  | -2.9273737531 | -0.4121209218 |
| H4   | -2.9937724088 | -2.6736769475 | 3.0115780294  |
| C8   | -2.7457092522 | 0.6539618582  | 3.6975262155  |
| C11  | -0.9667588878 | 2.1493399444  | 2.4114356404  |
| H7   | -3.1781071145 | 1.3980009698  | 4.3414501000  |
| C9   | -3.1860027373 | -0.6506742671 | 3.7535912964  |
| H8   | -3.9650269465 | -0.9130115590 | 4.4450494557  |
| C10  | -2.6416558807 | -1.6625876251 | 2.9369875099  |
| C12  | -0.0857743078 | 1.7755955971  | 1.4454283139  |
| C2   | 0.9164503009  | 2.6009974180  | 0.7343857052  |
| H13  | 1.7123800183  | -2.8842131896 | -0.2571412082 |
| C14  | 0.3088978040  | -2.7056385440 | -1.8863538501 |
| H15  | 0.2866736531  | -3.9117867885 | -0.0961463804 |

|     |               |               |               |
|-----|---------------|---------------|---------------|
| C15 | -0.2973622557 | -2.3040914497 | -4.5907098684 |
| C16 | 1.3065628895  | -2.3700351452 | -2.7900211464 |
| C17 | -0.9983945440 | -2.8282694144 | -2.3525013671 |
| C18 | -1.2991393561 | -2.6286610044 | -3.6904363154 |
| C19 | 1.0036021505  | -2.1732391689 | -4.1341691423 |
| H16 | 2.3304900741  | -2.2499797277 | -2.4490130079 |
| H17 | -1.7797248649 | -3.0692236040 | -1.6584418267 |
| H18 | -2.3091793966 | -2.7128159017 | -4.0314102359 |
| H19 | 1.7931017057  | -1.9116780263 | -4.8188293061 |
| H20 | -0.5306398208 | -2.1492911389 | -5.6298028759 |
| C1  | 0.5501654299  | -0.5106191206 | 0.4295419250  |
| H5  | 1.5613035628  | -0.5554938071 | 0.8239873713  |
| H6  | 0.6303048976  | -0.2234538860 | -0.6093977434 |
| C3  | 2.8015088368  | 4.1881714110  | -0.5810245152 |
| C26 | 1.8234927411  | 3.3659516372  | 1.4559907329  |
| C27 | 0.9590649824  | 2.6466221398  | -0.6560625455 |
| C28 | 1.8988761714  | 3.4310895081  | -1.3074873104 |
| C29 | 2.7564483373  | 4.1586935309  | 0.8023034085  |
| H1  | 1.8043237458  | 3.3261495512  | 2.5316351329  |
| H2  | 0.2432097047  | 2.0877393438  | -1.2297362427 |
| H3  | 1.9178440967  | 3.4562601140  | -2.3820556926 |
| H9  | 3.4514125005  | 4.7412314670  | 1.3756845720  |
| H10 | 3.5280434798  | 4.7976541261  | -1.0885472588 |
| H25 | -1.0762728724 | 3.1476511252  | 2.7825837903  |

nuclear repulsion energy..... 1971.760476131 hartrees

-----  
 / end of geometry optimization iteration 7 /  
 -----

end of program geopt

start of program onee  
 smallest eigenvalue of S: 2.799E-04  
 number of canonical orbitals..... 461  
 end of program onee

start of program probe  
 end of program probe

start of program grid

number of gridpoints:

| atom     | N1  | N2  | C4 | C5 | C6 | C7 | C13 |
|----------|-----|-----|----|----|----|----|-----|
| H4       |     |     |    |    |    |    |     |
| grid # 1 | 96  | 102 | 87 | 88 | 89 | 88 | 84  |
| 73       |     |     |    |    |    |    |     |
| grid # 2 | 104 | 112 | 95 | 95 | 97 | 98 | 92  |
| 118      |     |     |    |    |    |    |     |

|          |     |     |     |     |     |     |     |
|----------|-----|-----|-----|-----|-----|-----|-----|
| grid # 3 | 214 | 227 | 195 | 187 | 190 | 199 | 164 |
| 224      |     |     |     |     |     |     |     |
| grid # 4 | 388 | 414 | 320 | 320 | 327 | 348 | 301 |
| 224      |     |     |     |     |     |     |     |

|                       |     |     |     |     |     |     |     |
|-----------------------|-----|-----|-----|-----|-----|-----|-----|
| number of gridpoints: |     |     |     |     |     |     |     |
| atom                  | C8  | C11 | H7  | C9  | H8  | C10 | C12 |
| C2                    |     |     |     |     |     |     |     |
| grid # 1              | 89  | 86  | 73  | 87  | 73  | 89  | 84  |
| 92                    |     |     |     |     |     |     |     |
| grid # 2              | 97  | 94  | 118 | 97  | 118 | 97  | 95  |
| 100                   |     |     |     |     |     |     |     |
| grid # 3              | 184 | 185 | 223 | 184 | 222 | 184 | 195 |
| 195                   |     |     |     |     |     |     |     |
| grid # 4              | 330 | 331 | 226 | 329 | 223 | 326 | 321 |
| 343                   |     |     |     |     |     |     |     |

|                       |     |     |     |     |     |     |     |
|-----------------------|-----|-----|-----|-----|-----|-----|-----|
| number of gridpoints: |     |     |     |     |     |     |     |
| atom                  | H13 | C14 | H15 | C15 | C16 | C17 | C18 |
| C19                   |     |     |     |     |     |     |     |
| grid # 1              | 69  | 91  | 69  | 89  | 88  | 87  | 89  |
| 88                    |     |     |     |     |     |     |     |
| grid # 2              | 110 | 100 | 110 | 97  | 96  | 96  | 97  |
| 96                    |     |     |     |     |     |     |     |
| grid # 3              | 211 | 194 | 215 | 183 | 183 | 183 | 184 |
| 183                   |     |     |     |     |     |     |     |
| grid # 4              | 216 | 340 | 217 | 327 | 329 | 329 | 328 |
| 327                   |     |     |     |     |     |     |     |

|                       |     |     |     |     |     |     |     |
|-----------------------|-----|-----|-----|-----|-----|-----|-----|
| number of gridpoints: |     |     |     |     |     |     |     |
| atom                  | H16 | H17 | H18 | H19 | H20 | C1  | H5  |
| H6                    |     |     |     |     |     |     |     |
| grid # 1              | 72  | 73  | 73  | 73  | 73  | 82  | 70  |
| 69                    |     |     |     |     |     |     |     |
| grid # 2              | 114 | 114 | 118 | 118 | 118 | 88  | 108 |
| 105                   |     |     |     |     |     |     |     |
| grid # 3              | 214 | 216 | 222 | 222 | 223 | 164 | 217 |
| 207                   |     |     |     |     |     |     |     |
| grid # 4              | 214 | 215 | 224 | 222 | 224 | 290 | 217 |
| 204                   |     |     |     |     |     |     |     |

|                       |     |     |     |     |     |     |     |
|-----------------------|-----|-----|-----|-----|-----|-----|-----|
| number of gridpoints: |     |     |     |     |     |     |     |
| atom                  | C3  | C26 | C27 | C28 | C29 | H1  | H2  |
| H3                    |     |     |     |     |     |     |     |
| grid # 1              | 89  | 88  | 88  | 89  | 89  | 72  | 71  |
| 73                    |     |     |     |     |     |     |     |
| grid # 2              | 97  | 95  | 96  | 97  | 97  | 115 | 114 |
| 118                   |     |     |     |     |     |     |     |
| grid # 3              | 184 | 182 | 184 | 184 | 184 | 217 | 214 |
| 222                   |     |     |     |     |     |     |     |
| grid # 4              | 328 | 327 | 329 | 327 | 328 | 217 | 212 |
| 224                   |     |     |     |     |     |     |     |

number of gridpoints:

|          | atom | H9  | H10 | H25 | total |
|----------|------|-----|-----|-----|-------|
| grid # 1 |      | 73  | 73  | 72  | 3512  |
| grid # 2 |      | 118 | 118 | 115 | 4492  |
| grid # 3 |      | 222 | 223 | 220 | 8629  |
| grid # 4 |      | 224 | 224 | 224 | 12258 |

end of program grid

start of program rwr

end of program rwr

start of program scf

|      | i | u | d | i | g |                  | energy  | RMS     | maximum |
|------|---|---|---|---|---|------------------|---------|---------|---------|
|      | t | p | i | c | r |                  |         | density | DIIS    |
|      | e | d | i | u | i |                  | change  | change  | error   |
|      | r | t | s | t | d | total energy     |         |         |         |
| etot | 1 | N | N | 2 | U | -990.30270768203 |         | 4.6E-04 | 3.1E-02 |
| etot | 2 | Y | Y | 6 | M | -990.37847298562 | 7.6E-02 | 2.4E-04 | 1.2E-02 |
| etot | 3 | N | Y | 2 | U | -990.38974615112 | 1.1E-02 | 7.3E-05 | 3.0E-03 |
| etot | 4 | Y | Y | 6 | M | -990.39043838018 | 6.9E-04 | 2.1E-05 | 7.2E-04 |
| etot | 5 | Y | Y | 6 | M | -990.39051259464 | 7.4E-05 | 9.9E-06 | 1.8E-04 |
| etot | 6 | N | Y | 2 | U | -990.39052152447 | 8.9E-06 | 3.4E-06 | 8.4E-05 |
| etot | 7 | Y | N | 6 | M | -990.39052390496 | 2.4E-06 | 0.0E+00 | 0.0E+00 |

Energy components, in hartrees:

|     |                               |                   |       |
|-----|-------------------------------|-------------------|-------|
| (A) | Nuclear repulsion.....        | 1971.76047613143  |       |
| (E) | Total one-electron terms..... | -5261.77830707936 |       |
| (I) | Total two-electron terms..... | 2299.62730704297  |       |
| (L) | Electronic energy.....        | -2962.15100003639 | (E+I) |
| (N) | Total energy.....             | -990.39052390496  | (A+L) |

SCFE: SCF energy: HF -990.39052390496 hartrees iterations:

7

HOMO energy: -0.26911

LUMO energy: 0.09715

Orbital energies:

|           |           |           |           |           |           |
|-----------|-----------|-----------|-----------|-----------|-----------|
| -15.60451 | -15.56524 | -11.29616 | -11.28590 | -11.27118 | -11.25063 |
| -11.25053 | -11.24661 | -11.24537 | -11.24207 | -11.23978 | -11.23885 |
| -11.23840 | -11.23770 | -11.23689 | -11.23687 | -11.23575 | -11.23433 |
| -11.23300 | -11.23088 | -11.22421 | -11.21944 | -11.21799 | -11.21554 |
| -11.21243 | -1.32546  | -1.24901  | -1.16385  | -1.16049  | -1.13916  |
| -1.07447  | -1.06674  | -1.04044  | -1.02137  | -1.01939  | -1.01613  |

|          |          |          |          |          |          |
|----------|----------|----------|----------|----------|----------|
| -0.97215 | -0.95419 | -0.93387 | -0.86020 | -0.83767 | -0.83371 |
| -0.82913 | -0.80726 | -0.79554 | -0.77026 | -0.73264 | -0.71762 |
| -0.70168 | -0.69844 | -0.66645 | -0.65787 | -0.64274 | -0.63728 |
| -0.63416 | -0.62358 | -0.62128 | -0.61619 | -0.59608 | -0.59210 |
| -0.59055 | -0.58653 | -0.57915 | -0.55835 | -0.55307 | -0.54811 |
| -0.54314 | -0.51759 | -0.50730 | -0.50317 | -0.50057 | -0.49639 |
| -0.49350 | -0.49125 | -0.48704 | -0.48151 | -0.42958 | -0.40467 |
| -0.36720 | -0.34424 | -0.34058 | -0.33732 | -0.32999 | -0.28301 |
| -0.26911 | 0.09715  | 0.12930  | 0.13663  | 0.13689  | 0.14839  |
| 0.17926  | 0.20825  | 0.22812  | 0.23474  | 0.24177  |          |

end of program scf

start of program derla  
end of program derla

start of program rwr  
end of program rwr

start of program der1b

forces (hartrees/bohr) : total

| atom | label | x             | y             | z             |
|------|-------|---------------|---------------|---------------|
| ---- | ----- | -----         | -----         | -----         |
| 1    | N1    | 1.716334E-03  | -1.943601E-03 | -3.246573E-03 |
| 2    | N2    | 1.508741E-03  | 7.372569E-04  | -8.449564E-04 |
| 3    | C4    | 1.732777E-03  | -2.550928E-03 | -1.144846E-04 |
| 4    | C5    | -2.258395E-03 | -1.157807E-03 | 1.364650E-03  |
| 5    | C6    | 3.010108E-03  | -1.559524E-03 | -2.676497E-03 |
| 6    | C7    | -2.119800E-03 | 2.378055E-03  | 8.088183E-05  |
| 7    | C13   | 7.949520E-04  | -3.166784E-03 | 1.193967E-03  |
| 8    | H4    | -5.137608E-04 | -1.262150E-03 | 5.166284E-05  |
| 9    | C8    | -1.260196E-03 | -1.009633E-03 | 7.377051E-04  |
| 10   | C11   | 1.581835E-03  | 1.944482E-03  | 1.100216E-03  |
| 11   | H7    | -2.844006E-04 | 7.476233E-04  | 4.649418E-04  |
| 12   | C9    | 3.021764E-04  | 2.034644E-03  | 3.016599E-04  |
| 13   | H8    | -9.191824E-04 | -1.596108E-04 | 8.422822E-04  |
| 14   | C10   | -2.885543E-04 | -3.647628E-05 | 3.084839E-04  |
| 15   | C12   | -1.002256E-04 | 1.528865E-04  | 8.546479E-05  |
| 16   | C2    | -1.824596E-03 | -8.798194E-04 | 7.008701E-05  |
| 17   | H13   | -5.907107E-03 | 4.474195E-05  | -1.786917E-03 |
| 18   | C14   | 2.117880E-03  | 2.467810E-04  | 1.794266E-03  |
| 19   | H15   | 1.613655E-03  | 3.598184E-03  | -1.510856E-03 |
| 20   | C15   | 3.515496E-03  | 5.380807E-04  | 1.351633E-03  |
| 21   | C16   | 3.599045E-03  | 1.791191E-03  | -2.863792E-03 |
| 22   | C17   | 6.384644E-04  | 6.449569E-04  | -1.226921E-03 |
| 23   | C18   | 3.274344E-03  | 3.831445E-04  | 3.904487E-03  |
| 24   | C19   | 3.397778E-03  | 6.246062E-04  | 2.548436E-04  |



|       |       |               |               |               |
|-------|-------|---------------|---------------|---------------|
| 25    | H16   | -6.033188E-03 | -1.648501E-03 | -2.241051E-03 |
| 26    | H17   | -2.244134E-03 | -1.119039E-03 | 1.633890E-03  |
| 27    | H18   | -5.095790E-03 | -1.462176E-03 | -5.193377E-04 |
| 28    | H19   | -7.132674E-04 | -3.366359E-04 | 6.699522E-05  |
| 29    | H20   | 5.473843E-04  | 5.484700E-05  | 2.894166E-04  |
| 30    | C1    | -2.121480E-03 | 9.323276E-04  | 7.055723E-04  |
| 31    | H5    | 1.935195E-03  | 3.195981E-04  | 1.225099E-03  |
| 32    | H6    | 1.335999E-04  | 6.505389E-04  | -1.350591E-03 |
| 33    | C3    | 2.237467E-04  | 7.332118E-04  | 8.228264E-04  |
| 34    | C26   | 2.934216E-03  | 2.259092E-03  | 1.769155E-03  |
| 35    | C27   | 1.749225E-03  | 1.423862E-03  | -2.428323E-03 |
| 36    | C28   | -3.039822E-03 | -2.449444E-03 | -8.296198E-04 |
| 37    | C29   | -1.534705E-03 | -1.836397E-03 | 1.746854E-03  |
| 38    | H1    | 1.639685E-04  | 5.612689E-04  | -9.703912E-04 |
| 39    | H2    | -6.178164E-04 | -7.198783E-04 | -5.945158E-04 |
| 40    | H3    | -2.726356E-04 | -1.448398E-04 | -7.139410E-04 |
| 41    | H9    | 1.428431E-03  | 1.266800E-03  | 1.288079E-03  |
| 42    | H10   | 1.793635E-04  | 8.168534E-05  | 1.338084E-04  |
| 43    | H25   | -2.945761E-04 | 3.841792E-04  | 3.416161E-04  |
| ----- |       |               |               |               |
|       | total | 6.550833E-04  | 1.090803E-03  | 1.177413E-05  |

end of program derlb

start of program geopt 8

geometry optimization step 8

reading input hessian of dimension 129  
in five columns format

reading input hessian of dimension 129  
in five columns format

reading input hessian of dimension 129  
in five columns format

Level shifts adjusted to satisfy step-size constraints

Step size: 0.3001625

Cos(theta): 0.3290489

Final level shift: -3.2712361E-03

energy change: -1.7137E-03 . ( 5.0000E-05 )

gradient maximum: 6.5993E-03 . ( 4.5000E-04 )

gradient rms: 1.5880E-03 . ( 3.0000E-04 )

step size: 0.30014 trust radius: 0.30000

displacement maximum: 1.3289E-01 . ( 1.8000E-03 )

displacement rms: 2.3581E-02 . ( 1.2000E-03 )

predicted energy change: -1.1454E-03 geom step: 3.0014E-

01 full step: 3.0014E-01

molecular structure not yet converged...

center of mass moved by:

x: 1.4339E-03 y: 3.9888E-03 z: 1.3736E-03

new geometry:

|      | angstroms     |               |               |
|------|---------------|---------------|---------------|
| atom | x             | y             | z             |
| N1   | -0.2427301136 | 0.4133581705  | 1.1722777583  |
| N2   | -1.0454939928 | -2.3112638158 | 1.1699656111  |
| C4   | -1.2161957562 | -0.0597207232 | 2.0064760689  |
| C5   | -0.0696132821 | -1.9370852449 | 0.4798595573  |
| C6   | -1.6544570973 | -1.3757803348 | 2.0263648965  |
| C7   | -1.6847856453 | 0.9623542639  | 2.8316875226  |
| C13  | 0.5944122868  | -2.9384071474 | -0.4387964649 |
| H4   | -3.0378534973 | -2.6801972707 | 2.9787940568  |
| C8   | -2.7195283903 | 0.6400467042  | 3.7315827985  |
| C11  | -0.8978500352 | 2.1256728813  | 2.4741738095  |
| H7   | -3.1321827458 | 1.3838331907  | 4.3903874062  |
| C9   | -3.1856697575 | -0.6615094865 | 3.7551713096  |
| H8   | -3.9748299789 | -0.9205218030 | 4.4383849881  |
| C10  | -2.6599327111 | -1.6753768988 | 2.9171144248  |
| C12  | -0.0449844390 | 1.7563976980  | 1.4791878795  |
| C2   | 0.9261767262  | 2.6151140566  | 0.7518235711  |
| H13  | 1.6652174605  | -2.8719758706 | -0.3024610873 |
| C14  | 0.2876181649  | -2.7034242241 | -1.9136085293 |
| H15  | 0.2724733448  | -3.9275784756 | -0.1477724137 |
| C15  | -0.2818249606 | -2.3156026969 | -4.6110105067 |
| C16  | 1.3116920078  | -2.5254385140 | -2.8427232568 |
| C17  | -1.0214564856 | -2.6804795857 | -2.3448902825 |
| C18  | -1.3074367587 | -2.4976491583 | -3.6888738098 |
| C19  | 1.0337227845  | -2.3208152467 | -4.1837294462 |
| H16  | 2.3428974456  | -2.5809231360 | -2.5252940373 |
| H17  | -1.8180053491 | -2.8390751217 | -1.6358051292 |
| H18  | -2.3411635228 | -2.5448754781 | -4.0117834742 |
| H19  | 1.8504547007  | -2.2045671815 | -4.8863974827 |
| H20  | -0.5093223464 | -2.1903514419 | -5.6550411487 |
| C1   | 0.5725384418  | -0.5359270224 | 0.4467237410  |
| H5   | 1.5825600909  | -0.6025572202 | 0.8639586010  |
| H6   | 0.6849443477  | -0.2439441492 | -0.5977493705 |
| C3   | 2.7427643680  | 4.2718109037  | -0.5786007634 |
| C26  | 1.7583262170  | 3.4655134300  | 1.4748050376  |
| C27  | 1.0258000879  | 2.6093370968  | -0.6475070512 |
| C28  | 1.9286490508  | 3.4252015088  | -1.3062477428 |
| C29  | 2.6507103176  | 4.2926508665  | 0.8143808905  |
| H1   | 1.7064457766  | 3.4685024593  | 2.5540630146  |
| H2   | 0.3832676468  | 1.9769465517  | -1.2258047756 |
| H3   | 1.9981625157  | 3.3991783059  | -2.3867378260 |
| H9   | 3.2735304395  | 4.9523138350  | 1.3873712355  |
| H10  | 3.4343293803  | 4.9068564617  | -1.0932588436 |
| H25  | -0.9916197529 | 3.1137132967  | 2.8763314713  |

nuclear repulsion energy..... 1966.909747028 hartrees

-----

/ end of geometry optimization iteration 8 /

-----

end of program geopt

start of program onee  
 smallest eigenvalue of S: 2.927E-04  
 number of canonical orbitals..... 461  
 end of program onee

start of program probe  
 end of program probe

start of program grid

number of gridpoints:

| atom     | N1  | N2  | C4  | C5  | C6  | C7  | C13 |
|----------|-----|-----|-----|-----|-----|-----|-----|
| H4       |     |     |     |     |     |     |     |
| grid # 1 | 96  | 102 | 86  | 88  | 88  | 90  | 84  |
| 73       |     |     |     |     |     |     |     |
| grid # 2 | 104 | 112 | 94  | 95  | 101 | 98  | 92  |
| 118      |     |     |     |     |     |     |     |
| grid # 3 | 215 | 228 | 195 | 186 | 189 | 198 | 163 |
| 223      |     |     |     |     |     |     |     |
| grid # 4 | 388 | 413 | 323 | 321 | 327 | 351 | 300 |
| 224      |     |     |     |     |     |     |     |

number of gridpoints:

| atom     | C8  | C11 | H7  | C9  | H8  | C10 | C12 |
|----------|-----|-----|-----|-----|-----|-----|-----|
| C2       |     |     |     |     |     |     |     |
| grid # 1 | 89  | 87  | 73  | 87  | 73  | 89  | 86  |
| 91       |     |     |     |     |     |     |     |
| grid # 2 | 97  | 94  | 118 | 97  | 118 | 97  | 95  |
| 100      |     |     |     |     |     |     |     |
| grid # 3 | 184 | 185 | 223 | 185 | 222 | 184 | 194 |
| 195      |     |     |     |     |     |     |     |
| grid # 4 | 329 | 331 | 226 | 331 | 224 | 328 | 318 |
| 343      |     |     |     |     |     |     |     |

number of gridpoints:

| atom     | H13 | C14 | H15 | C15 | C16 | C17 | C18 |
|----------|-----|-----|-----|-----|-----|-----|-----|
| C19      |     |     |     |     |     |     |     |
| grid # 1 | 69  | 90  | 69  | 89  | 87  | 88  | 88  |
| 88       |     |     |     |     |     |     |     |
| grid # 2 | 107 | 98  | 111 | 97  | 96  | 96  | 97  |
| 97       |     |     |     |     |     |     |     |
| grid # 3 | 209 | 195 | 218 | 183 | 184 | 184 | 184 |
| 182      |     |     |     |     |     |     |     |

```

    grid # 4      207      339      213      329      329      330      331
330

```

```

    number of gridpoints:
      atom      H16      H17      H18      H19      H20      C1      H5
H6
    grid # 1      73      73      73      73      73      82      70
69
    grid # 2      114      115      118      118      118      90      110
105
    grid # 3      214      215      223      222      224      166      217
205
    grid # 4      213      215      223      222      224      293      220
207

```

```

    number of gridpoints:
      atom      C3      C26      C27      C28      C29      H1      H2
H3
    grid # 1      89      89      88      89      89      72      70
73
    grid # 2      97      96      96      97      97      115      113
118
    grid # 3      186      182      185      184      186      217      213
222
    grid # 4      330      327      328      327      330      217      210
224

```

```

    number of gridpoints:
      atom      H9      H10      H25      total
grid # 1      73      73      72      3513
grid # 2      118      118      115      4497
grid # 3      223      223      219      8634
grid # 4      223      223      222      12263

```

end of program grid

```

start of program rwr
end of program rwr

```

start of program scf

|      | i | u | d | i | g |                  |         | RMS     | maximum |
|------|---|---|---|---|---|------------------|---------|---------|---------|
|      | t | p | i | c | r |                  |         | density | DIIS    |
|      | e | d | i | u | i |                  | energy  | change  | error   |
|      | r | t | s | t | d | total energy     | change  |         |         |
| etot | 1 | N | N | 2 | U | -990.33991144147 |         | 3.6E-04 | 2.8E-02 |
| etot | 2 | Y | Y | 6 | M | -990.38172607361 | 4.2E-02 | 1.8E-04 | 1.1E-02 |
| etot | 3 | N | Y | 2 | U | -990.38813338998 | 6.4E-03 | 5.5E-05 | 2.7E-03 |
| etot | 4 | Y | Y | 6 | M | -990.38854871108 | 4.2E-04 | 2.2E-05 | 8.5E-04 |

|      |   |   |   |   |   |                  |         |         |         |
|------|---|---|---|---|---|------------------|---------|---------|---------|
| etot | 5 | Y | Y | 6 | M | -990.38862044730 | 7.2E-05 | 8.4E-06 | 1.6E-04 |
| etot | 6 | N | Y | 2 | U | -990.38863299439 | 1.3E-05 | 3.2E-06 | 5.7E-05 |
| etot | 7 | Y | N | 6 | M | -990.38863307052 | 7.6E-08 | 0.0E+00 | 0.0E+00 |

Energy components, in hartrees:

|     |                               |                   |       |
|-----|-------------------------------|-------------------|-------|
| (A) | Nuclear repulsion.....        | 1966.90974702809  |       |
| (E) | Total one-electron terms..... | -5252.08828716800 |       |
| (I) | Total two-electron terms..... | 2294.78990706939  |       |
| (L) | Electronic energy.....        | -2957.29838009861 | (E+I) |
| (N) | Total energy.....             | -990.38863307052  | (A+L) |

SCFE: SCF energy: HF      -990.38863307052 hartrees      iterations:  
7

HOMO energy:      -0.26918  
LUMO energy:      0.09483

Orbital energies:

|           |           |           |           |           |           |
|-----------|-----------|-----------|-----------|-----------|-----------|
| -15.60546 | -15.56553 | -11.29617 | -11.28888 | -11.27440 | -11.25323 |
| -11.25291 | -11.24932 | -11.24466 | -11.23989 | -11.23899 | -11.23849 |
| -11.23820 | -11.23781 | -11.23695 | -11.23662 | -11.23581 | -11.23470 |
| -11.23345 | -11.22918 | -11.22676 | -11.22253 | -11.22247 | -11.21821 |
| -11.21580 | -1.32205  | -1.25283  | -1.16216  | -1.16049  | -1.13639  |
| -1.07414  | -1.06661  | -1.03656  | -1.02137  | -1.01847  | -1.01697  |
| -0.96944  | -0.95479  | -0.93227  | -0.85933  | -0.83776  | -0.83195  |
| -0.82823  | -0.80624  | -0.79536  | -0.76922  | -0.73264  | -0.71663  |
| -0.70030  | -0.69768  | -0.66473  | -0.65767  | -0.64239  | -0.63624  |
| -0.63253  | -0.62481  | -0.62019  | -0.61335  | -0.59730  | -0.59249  |
| -0.58848  | -0.58801  | -0.57615  | -0.55734  | -0.55154  | -0.54848  |
| -0.54556  | -0.51729  | -0.50702  | -0.50198  | -0.49950  | -0.49588  |
| -0.49449  | -0.49099  | -0.48779  | -0.47966  | -0.42997  | -0.40493  |
| -0.36948  | -0.34394  | -0.33991  | -0.33752  | -0.32983  | -0.28137  |
| -0.26918  | 0.09483   | 0.12818   | 0.13771   | 0.13869   | 0.14741   |
| 0.17628   | 0.20896   | 0.22759   | 0.23471   | 0.23973   |           |

end of program scf

start of program der1a  
end of program der1a

start of program rwr  
end of program rwr

start of program der1b

forces (hartrees/bohr) : total

| atom  | label | x             | y             | z             |
|-------|-------|---------------|---------------|---------------|
| 1     | N1    | -3.608445E-03 | 2.818146E-03  | 4.387853E-03  |
| 2     | N2    | -8.257060E-03 | -1.291490E-03 | 6.873558E-03  |
| 3     | C4    | 2.927401E-04  | 9.089283E-03  | 2.291217E-03  |
| 4     | C5    | 1.159396E-02  | 4.274925E-03  | -1.002984E-02 |
| 5     | C6    | -2.111425E-03 | 3.526585E-03  | 5.173623E-03  |
| 6     | C7    | 3.146159E-03  | -4.915515E-03 | -4.361290E-03 |
| 7     | C13   | 1.197140E-03  | 3.152175E-03  | -4.853313E-03 |
| 8     | H4    | 6.158857E-05  | 2.208153E-04  | -3.754693E-04 |
| 9     | C8    | 3.232912E-03  | -4.388872E-03 | -3.687738E-03 |
| 10    | C11   | -2.930359E-03 | -7.516295E-03 | -1.095850E-03 |
| 11    | H7    | -5.246514E-04 | -5.339326E-04 | 3.142423E-05  |
| 12    | C9    | 2.211024E-03  | 7.245822E-04  | -2.076187E-03 |
| 13    | H8    | -9.756688E-05 | -4.122068E-04 | 2.025975E-04  |
| 14    | C10   | 2.685113E-04  | 4.837745E-03  | 1.404553E-03  |
| 15    | C12   | 1.505465E-03  | 8.606128E-04  | -3.784882E-03 |
| 16    | C2    | 4.596320E-04  | -4.228012E-03 | -4.301454E-03 |
| 17    | H13   | 4.376286E-03  | -2.059499E-03 | 1.720359E-03  |
| 18    | C14   | 1.184396E-02  | 2.108409E-03  | 5.874802E-03  |
| 19    | H15   | -6.450204E-04 | -1.250607E-03 | 1.770200E-03  |
| 20    | C15   | -5.854112E-03 | 1.356985E-04  | -5.815791E-04 |
| 21    | C16   | 3.009072E-03  | -1.664308E-03 | 4.118831E-03  |
| 22    | C17   | -8.790402E-03 | -1.738000E-03 | -6.298458E-03 |
| 23    | C18   | -4.719041E-03 | -2.976537E-03 | -2.898018E-03 |
| 24    | C19   | 3.419037E-03  | -2.514676E-03 | -7.224967E-04 |
| 25    | H16   | -2.647010E-03 | 1.940020E-03  | 9.827487E-04  |
| 26    | H17   | 7.504203E-04  | 1.171925E-03  | -1.479661E-03 |
| 27    | H18   | 6.000360E-03  | 3.165718E-03  | -3.106612E-04 |
| 28    | H19   | -5.276927E-03 | 3.874991E-04  | 2.823860E-03  |
| 29    | H20   | -6.458594E-04 | 6.314977E-04  | 1.160412E-04  |
| 30    | C1    | 4.753900E-04  | -1.944511E-03 | -4.062617E-03 |
| 31    | H5    | -3.832564E-03 | -2.580860E-04 | -2.786851E-04 |
| 32    | H6    | -7.710760E-04 | -1.574150E-03 | 5.124757E-03  |
| 33    | C3    | -8.483867E-04 | 5.126358E-04  | 1.028467E-02  |
| 34    | C26   | -3.375860E-04 | 6.706250E-04  | 2.040083E-04  |
| 35    | C27   | -2.580503E-03 | -2.382582E-03 | 7.317669E-03  |
| 36    | C28   | -4.311198E-04 | -1.818641E-03 | -1.976063E-03 |
| 37    | C29   | 3.356317E-04  | 9.286614E-04  | -7.586848E-03 |
| 38    | H1    | 4.426202E-04  | 2.672569E-04  | -4.159578E-03 |
| 39    | H2    | -3.082192E-03 | -2.219428E-03 | -4.993021E-04 |
| 40    | H3    | -1.537561E-03 | 6.603144E-05  | 5.377819E-03  |
| 41    | H9    | 2.343965E-03  | 1.305606E-03  | 1.437853E-04  |
| 42    | H10   | 3.434594E-03  | 3.036993E-03  | 3.538105E-04  |
| 43    | H25   | 3.444813E-05  | 5.165315E-04  | -1.111761E-03 |
| total |       | 9.060454E-04  | 6.626275E-04  | 4.644130E-05  |

end of program der1b

start of program geopt 9

```

geometry optimization step 9
reading input hessian of dimension 129
  in five columns format
reading input hessian of dimension 129
  in five columns format
reading input hessian of dimension 129
  in five columns format
** restarting optimization from step 8 **

```

Level shifts adjusted to satisfy step-size constraints

Step size: 0.3007076

Cos(theta): 0.3121536

Final level shift: -6.2152375E-03

```

energy change:          1.8908E-03 . ( 5.0000E-05 )
gradient maximum:       6.5993E-03 . ( 4.5000E-04 )
gradient rms:          1.5880E-03 . ( 3.0000E-04 )
step size: 0.29990 trust radius: 0.30000
displacement maximum:   1.3848E-01 . ( 1.8000E-03 )
displacement rms:       2.3562E-02 . ( 1.2000E-03 )
predicted energy change: -1.2255E-03 geom step: 2.9990E-
01 full step: 2.9990E-01
molecular structure not yet converged...

```

center of mass moved by:

x: -7.4940E-16 y: 2.6368E-16 z: -8.3267E-16

new geometry:

|      | angstroms     |               |               |
|------|---------------|---------------|---------------|
| atom | x             | y             | z             |
| N1   | -0.2112213224 | 0.4759821970  | 1.1509370987  |
| N2   | -0.9304654889 | -2.2596315619 | 1.1557263606  |
| C4   | -1.2007566870 | -0.0050996186 | 1.9468199390  |
| C5   | 0.0308354325  | -1.8599684763 | 0.4447847412  |
| C6   | -1.5893298383 | -1.3330206181 | 1.9833821552  |
| C7   | -1.7559182331 | 1.0130893177  | 2.7060893243  |
| C13  | 0.7195427103  | -2.8544750054 | -0.4654951884 |
| H4   | -2.9732939203 | -2.6636627946 | 2.8871238361  |
| C8   | -2.8165407677 | 0.6740276669  | 3.5624798977  |
| C11  | -0.9876468060 | 2.1851605542  | 2.3748675911  |
| H7   | -3.2934365683 | 1.4196419607  | 4.1781118649  |
| C9   | -3.2309842879 | -0.6335021660 | 3.6104914752  |
| H8   | -4.0426550097 | -0.9068067006 | 4.2655024799  |
| C10  | -2.6247327918 | -1.6447328748 | 2.8300957907  |
| C12  | -0.0663221250 | 1.8221726220  | 1.4414763503  |
| C2   | 0.9615610706  | 2.6573510475  | 0.7929901780  |
| H13  | 1.7804240263  | -2.7291419038 | -0.3977998181 |
| C14  | 0.2904550036  | -2.7194671495 | -1.9078212042 |
| H15  | 0.4874628272  | -3.8353817165 | -0.1033936907 |

|     |               |               |               |
|-----|---------------|---------------|---------------|
| C15 | -0.5195728220 | -2.5100998311 | -4.5600986738 |
| C16 | 1.1731723675  | -2.2603581915 | -2.8876463572 |
| C17 | -1.0114333568 | -3.0801698853 | -2.2799362236 |
| C18 | -1.4107209530 | -2.9767515754 | -3.5926183840 |
| C19 | 0.7731816258  | -2.1547371391 | -4.2060163333 |
| H16 | 2.1848694620  | -1.9871622113 | -2.6169976829 |
| H17 | -1.6947814125 | -3.4329355076 | -1.5285602629 |
| H18 | -2.3991425622 | -3.2559857461 | -3.8614828367 |
| H19 | 1.4638084288  | -1.7938641349 | -4.9522904025 |
| H20 | -0.8298119621 | -2.4271286947 | -5.5831759553 |
| C1  | 0.6128319456  | -0.4474688200 | 0.4042533197  |
| H5  | 1.6225608382  | -0.4852424998 | 0.8284411699  |
| H6  | 0.7094088190  | -0.1466392262 | -0.6361783628 |
| C3  | 2.9218539781  | 4.2333037928  | -0.3978184205 |
| C26 | 1.8547642164  | 3.3951618772  | 1.5732849714  |
| C27 | 1.0554555784  | 2.7250390584  | -0.5942672449 |
| C28 | 2.0276025330  | 3.5107060596  | -1.1848132236 |
| C29 | 2.8296541634  | 4.1778589369  | 0.9812369472  |
| H1  | 1.7838933136  | 3.3413965331  | 2.6388352230  |
| H2  | 0.3516514934  | 2.1776688845  | -1.2016643395 |
| H3  | 2.0892544843  | 3.5634944072  | -2.2542289962 |
| H9  | 3.5239664473  | 4.7363520807  | 1.5935527668  |
| H10 | 3.6885398335  | 4.8392355334  | -0.8576710935 |
| H25 | -1.1255993547 | 3.1803096411  | 2.7475409393  |

nuclear repulsion energy..... 1969.045876041 hartrees

-----  
 / end of geometry optimization iteration 9 /  
 -----

end of program geopt

start of program onee  
 smallest eigenvalue of S: 2.808E-04  
 number of canonical orbitals..... 461  
 end of program onee

start of program probe  
 end of program probe

start of program grid

| number of gridpoints: |          | N1  | N2  | C4 | C5 | C6  | C7 | C13 |
|-----------------------|----------|-----|-----|----|----|-----|----|-----|
| H4                    | atom     |     |     |    |    |     |    |     |
|                       | grid # 1 | 95  | 102 | 84 | 87 | 89  | 90 | 84  |
| 73                    |          |     |     |    |    |     |    |     |
|                       | grid # 2 | 104 | 112 | 95 | 95 | 101 | 98 | 92  |
| 118                   |          |     |     |    |    |     |    |     |



|          |     |     |     |     |     |     |     |
|----------|-----|-----|-----|-----|-----|-----|-----|
| grid # 3 | 212 | 227 | 193 | 187 | 192 | 198 | 163 |
| 224      |     |     |     |     |     |     |     |
| grid # 4 | 386 | 414 | 324 | 320 | 324 | 350 | 294 |
| 224      |     |     |     |     |     |     |     |

|                       |     |     |     |     |     |     |     |
|-----------------------|-----|-----|-----|-----|-----|-----|-----|
| number of gridpoints: |     |     |     |     |     |     |     |
| atom                  | C8  | C11 | H7  | C9  | H8  | C10 | C12 |
| C2                    |     |     |     |     |     |     |     |
| grid # 1              | 89  | 86  | 73  | 87  | 73  | 89  | 86  |
| 90                    |     |     |     |     |     |     |     |
| grid # 2              | 97  | 94  | 118 | 97  | 118 | 97  | 94  |
| 100                   |     |     |     |     |     |     |     |
| grid # 3              | 184 | 184 | 223 | 184 | 222 | 184 | 195 |
| 194                   |     |     |     |     |     |     |     |
| grid # 4              | 328 | 332 | 226 | 328 | 223 | 330 | 317 |
| 341                   |     |     |     |     |     |     |     |

|                       |     |     |     |     |     |     |     |
|-----------------------|-----|-----|-----|-----|-----|-----|-----|
| number of gridpoints: |     |     |     |     |     |     |     |
| atom                  | H13 | C14 | H15 | C15 | C16 | C17 | C18 |
| C19                   |     |     |     |     |     |     |     |
| grid # 1              | 69  | 91  | 69  | 89  | 88  | 87  | 89  |
| 89                    |     |     |     |     |     |     |     |
| grid # 2              | 108 | 100 | 109 | 97  | 96  | 96  | 97  |
| 97                    |     |     |     |     |     |     |     |
| grid # 3              | 211 | 196 | 214 | 186 | 184 | 182 | 183 |
| 184                   |     |     |     |     |     |     |     |
| grid # 4              | 210 | 341 | 212 | 329 | 328 | 326 | 329 |
| 327                   |     |     |     |     |     |     |     |

|                       |     |     |     |     |     |     |     |
|-----------------------|-----|-----|-----|-----|-----|-----|-----|
| number of gridpoints: |     |     |     |     |     |     |     |
| atom                  | H16 | H17 | H18 | H19 | H20 | C1  | H5  |
| H6                    |     |     |     |     |     |     |     |
| grid # 1              | 72  | 72  | 73  | 73  | 73  | 82  | 70  |
| 69                    |     |     |     |     |     |     |     |
| grid # 2              | 114 | 115 | 118 | 118 | 118 | 90  | 108 |
| 104                   |     |     |     |     |     |     |     |
| grid # 3              | 213 | 215 | 223 | 222 | 223 | 164 | 217 |
| 206                   |     |     |     |     |     |     |     |
| grid # 4              | 214 | 215 | 223 | 223 | 224 | 293 | 219 |
| 208                   |     |     |     |     |     |     |     |

|                       |     |     |     |     |     |     |     |
|-----------------------|-----|-----|-----|-----|-----|-----|-----|
| number of gridpoints: |     |     |     |     |     |     |     |
| atom                  | C3  | C26 | C27 | C28 | C29 | H1  | H2  |
| H3                    |     |     |     |     |     |     |     |
| grid # 1              | 89  | 87  | 87  | 89  | 89  | 72  | 71  |
| 73                    |     |     |     |     |     |     |     |
| grid # 2              | 97  | 95  | 96  | 97  | 97  | 115 | 114 |
| 118                   |     |     |     |     |     |     |     |
| grid # 3              | 185 | 181 | 182 | 184 | 185 | 217 | 213 |
| 223                   |     |     |     |     |     |     |     |
| grid # 4              | 330 | 328 | 330 | 327 | 328 | 216 | 212 |
| 224                   |     |     |     |     |     |     |     |

number of gridpoints:

|          | atom | H9  | H10 | H25 | total |
|----------|------|-----|-----|-----|-------|
| grid # 1 |      | 73  | 73  | 72  | 3507  |
| grid # 2 |      | 118 | 118 | 115 | 4495  |
| grid # 3 |      | 223 | 223 | 220 | 8625  |
| grid # 4 |      | 224 | 224 | 224 | 12249 |

end of program grid

start of program rwr

end of program rwr

start of program scf

|      | i | u | d | i | g |                  | energy   | RMS     | maximum |
|------|---|---|---|---|---|------------------|----------|---------|---------|
|      | t | p | i | c | r |                  |          | density | DIIS    |
|      | e | d | i | u | i |                  | change   | change  | error   |
|      | r | t | s | t | d | total energy     |          |         |         |
| etot | 1 | N | N | 2 | U | -990.19143961399 |          | 6.9E-04 | 5.1E-02 |
| etot | 2 | Y | Y | 6 | M | -990.36304368943 | 1.7E-01  | 3.6E-04 | 2.1E-02 |
| etot | 3 | N | Y | 2 | U | -990.38756589331 | 2.5E-02  | 1.1E-04 | 4.9E-03 |
| etot | 4 | Y | Y | 6 | M | -990.38902919237 | 1.5E-03  | 3.0E-05 | 1.2E-03 |
| etot | 5 | Y | Y | 6 | M | -990.38919073874 | 1.6E-04  | 1.6E-05 | 3.2E-04 |
| etot | 6 | N | Y | 2 | U | -990.38919602691 | 5.3E-06  | 5.3E-06 | 8.1E-05 |
| etot | 7 | Y | Y | 6 | M | -990.38919546120 | -5.7E-07 | 2.6E-06 | 3.1E-05 |
| etot | 8 | Y | N | 6 | M | -990.38919647219 | 1.0E-06  | 0.0E+00 | 0.0E+00 |

Energy components, in hartrees:

|     |                               |                   |       |
|-----|-------------------------------|-------------------|-------|
| (A) | Nuclear repulsion.....        | 1969.04587604074  |       |
| (E) | Total one-electron terms..... | -5256.35681247047 |       |
| (I) | Total two-electron terms..... | 2296.92173995754  |       |
| (L) | Electronic energy.....        | -2959.43507251293 | (E+I) |
| (N) | Total energy.....             | -990.38919647219  | (A+L) |

SCFE: SCF energy: HF      -990.38919647219 hartrees      iterations:  
8

HOMO energy:      -0.26840  
LUMO energy:      0.09701

Orbital energies:

|           |           |           |           |           |           |
|-----------|-----------|-----------|-----------|-----------|-----------|
| -15.60534 | -15.56470 | -11.29636 | -11.28875 | -11.27084 | -11.25072 |
| -11.25052 | -11.24617 | -11.24576 | -11.24057 | -11.23986 | -11.23892 |
| -11.23842 | -11.23745 | -11.23597 | -11.23589 | -11.23480 | -11.23326 |
| -11.23202 | -11.22987 | -11.22361 | -11.22021 | -11.21809 | -11.21556 |
| -11.21238 | -1.32578  | -1.25026  | -1.16340  | -1.15935  | -1.13851  |

|          |          |          |          |          |          |
|----------|----------|----------|----------|----------|----------|
| -1.07486 | -1.06779 | -1.03915 | -1.02304 | -1.01954 | -1.01789 |
| -0.96974 | -0.95431 | -0.93406 | -0.86044 | -0.83631 | -0.83390 |
| -0.82845 | -0.80772 | -0.79588 | -0.77036 | -0.73270 | -0.71782 |
| -0.70108 | -0.69798 | -0.66655 | -0.65810 | -0.64342 | -0.63833 |
| -0.63434 | -0.62250 | -0.62043 | -0.61751 | -0.59675 | -0.59349 |
| -0.59179 | -0.58934 | -0.57738 | -0.55766 | -0.55188 | -0.54826 |
| -0.54421 | -0.51763 | -0.50773 | -0.50313 | -0.50021 | -0.49540 |
| -0.49235 | -0.49068 | -0.48759 | -0.48192 | -0.42965 | -0.40506 |
| -0.36691 | -0.34326 | -0.34192 | -0.33901 | -0.32575 | -0.28176 |
| -0.26840 | 0.09701  | 0.12789  | 0.13689  | 0.13892  | 0.14831  |
| 0.17873  | 0.20902  | 0.22650  | 0.23488  | 0.24146  |          |

end of program scf

start of program derla  
end of program derla

start of program rwr  
end of program rwr

start of program derlb

forces (hartrees/bohr) : total

| atom | label | x             | y             | z             |
|------|-------|---------------|---------------|---------------|
| ---- | ----- | -----         | -----         | -----         |
| 1    | N1    | -1.847904E-03 | 1.350870E-03  | 1.372186E-03  |
| 2    | N2    | 8.004859E-04  | -1.184322E-03 | -1.290199E-03 |
| 3    | C4    | -2.990647E-03 | 1.894084E-03  | -1.153339E-03 |
| 4    | C5    | -1.267694E-03 | -1.405869E-03 | 2.168808E-03  |
| 5    | C6    | -3.781687E-03 | 1.063700E-03  | 1.466086E-03  |
| 6    | C7    | 3.701565E-03  | -2.358705E-03 | 9.208506E-04  |
| 7    | C13   | -6.358814E-03 | 5.686112E-03  | 1.117194E-03  |
| 8    | H4    | 7.566979E-04  | 2.267632E-03  | 4.118942E-04  |
| 9    | C8    | 3.487603E-04  | 4.660037E-03  | 1.792745E-03  |
| 10   | C11   | -4.761810E-04 | -4.721753E-05 | -2.385896E-03 |
| 11   | H7    | 6.406881E-04  | -9.788330E-04 | -1.030604E-03 |
| 12   | C9    | -1.838024E-03 | -6.112861E-03 | 1.573878E-04  |
| 13   | H8    | 1.321968E-03  | 2.841587E-04  | -1.158728E-03 |
| 14   | C10   | -9.988378E-04 | -2.699473E-03 | -2.337905E-04 |
| 15   | C12   | -3.644818E-04 | 5.292972E-04  | 1.985804E-03  |
| 16   | C2    | 4.214487E-03  | 2.571180E-03  | 2.054306E-03  |
| 17   | H13   | 1.220174E-02  | 2.129938E-03  | 9.413491E-04  |
| 18   | C14   | -1.971814E-03 | -2.257252E-04 | -1.000693E-02 |
| 19   | H15   | -2.739856E-03 | -7.545521E-03 | 3.261445E-03  |
| 20   | C15   | -3.750255E-04 | -1.032296E-03 | 2.979952E-03  |
| 21   | C16   | 3.971553E-04  | -1.694801E-03 | 1.180222E-02  |
| 22   | C17   | 1.081296E-02  | 3.319375E-03  | 5.677630E-03  |
| 23   | C18   | 1.275942E-02  | 5.331517E-03  | -6.004976E-03 |

|       |     |               |               |               |
|-------|-----|---------------|---------------|---------------|
| 24    | C19 | -6.135291E-03 | -1.513302E-04 | -5.275360E-03 |
| 25    | H16 | -3.575445E-03 | -1.293270E-03 | 1.989000E-04  |
| 26    | H17 | -2.282103E-04 | -2.076355E-04 | 5.184705E-04  |
| 27    | H18 | -1.003847E-02 | -2.388316E-03 | -4.271375E-03 |
| 28    | H19 | -1.686569E-03 | -1.077089E-03 | 1.228071E-03  |
| 29    | H20 | -1.715323E-03 | -1.767050E-04 | -2.514137E-03 |
| 30    | C1  | 6.153916E-03  | 1.649965E-03  | 1.097077E-03  |
| 31    | H5  | -3.027084E-03 | -3.480673E-04 | -3.342055E-03 |
| 32    | H6  | -1.486703E-04 | -3.556652E-04 | 2.982007E-03  |
| 33    | C3  | 1.936388E-06  | 2.107970E-04  | -5.988076E-03 |
| 34    | C26 | -4.239919E-03 | -2.750183E-03 | -4.310837E-03 |
| 35    | C27 | -6.213987E-04 | -7.833312E-05 | 4.417728E-04  |
| 36    | C28 | 4.704144E-03  | 3.029595E-03  | 2.767092E-03  |
| 37    | C29 | 2.147902E-03  | 1.746275E-03  | 9.650488E-04  |
| 38    | H1  | -4.030953E-04 | -8.930180E-04 | 4.530742E-03  |
| 39    | H2  | 1.885956E-03  | 1.855455E-03  | 5.925202E-04  |
| 40    | H3  | 5.723930E-04  | 3.930392E-04  | -2.575663E-03 |
| 41    | H9  | -2.986811E-03 | -2.049155E-03 | -1.829814E-03 |
| 42    | H10 | -2.808888E-03 | -1.906220E-03 | -3.199569E-05 |
| 43    | H25 | 3.854478E-04  | -1.625851E-04 | -2.576043E-04 |
| ----- |     |               |               |               |
| total |     | 1.181474E-03  | 8.498306E-04  | -2.298122E-04 |

end of program derlb

start of program geopt 10

geometry optimization step 10

[ turning on trust-radius adjustment ]

reading input hessian of dimension 129

in five columns format

reading input hessian of dimension 129

in five columns format

reading input hessian of dimension 129

in five columns format

\*\* restarting optimization from step 8 \*\*

energy change: 1.3274E-03 . ( 5.0000E-05 )

gradient maximum: 6.5993E-03 . ( 4.5000E-04 )

gradient rms: 1.5880E-03 . ( 3.0000E-04 )

step size: 0.12023 trust radius: 0.15000

displacement maximum: 4.6109E-02 . ( 1.8000E-03 )

displacement rms: 9.4462E-03 . ( 1.2000E-03 )

predicted energy change: -6.6309E-04 geom step: 1.2023E-

01 full step: 1.2023E-01

molecular structure not yet converged...

center of mass moved by:

x: 5.8287E-16 y: 2.6368E-16 z: 5.5511E-17

new geometry:

|      | angstroms     |               |               |
|------|---------------|---------------|---------------|
| atom | x             | y             | z             |
| N1   | -0.2503467923 | 0.4313387940  | 1.1728975667  |
| N2   | -0.9922353568 | -2.3008642645 | 1.2068479080  |
| C4   | -1.2177846926 | -0.0412413961 | 2.0027340636  |
| C5   | -0.0328950456 | -1.9152046665 | 0.4874677885  |
| C6   | -1.6207580303 | -1.3658403732 | 2.0516318574  |
| C7   | -1.7256576704 | 0.9802469690  | 2.7898913510  |
| C13  | 0.6345154182  | -2.9213500262 | -0.4256979858 |
| H4   | -2.9784638181 | -2.6865579845 | 3.0093481473  |
| C8   | -2.7573880472 | 0.6486468955  | 3.6876420923  |
| C11  | -0.9686088796 | 2.1508712541  | 2.4150585939  |
| H7   | -3.2011472190 | 1.3958055134  | 4.3235415609  |
| C9   | -3.1880965526 | -0.6579308626 | 3.7452763889  |
| H8   | -3.9761108933 | -0.9234283427 | 4.4292771187  |
| C10  | -2.6259600579 | -1.6723713900 | 2.9368264804  |
| C12  | -0.0840044705 | 1.7791562074  | 1.4502481760  |
| C2   | 0.9094340782  | 2.6151448582  | 0.7396605597  |
| H13  | 1.7117184108  | -2.8786891597 | -0.2812033952 |
| C14  | 0.3106147337  | -2.6930411706 | -1.8952436050 |
| H15  | 0.2973278585  | -3.9045733242 | -0.1220199652 |
| C15  | -0.3176308144 | -2.3047012879 | -4.5894802502 |
| C16  | 1.3058774411  | -2.4094783712 | -2.8200443949 |
| C17  | -1.0094991762 | -2.7875081323 | -2.3386183614 |
| C18  | -1.3208168237 | -2.5954695037 | -3.6744560256 |
| C19  | 0.9966496806  | -2.2130779832 | -4.1595138305 |
| H16  | 2.3268560103  | -2.3606962160 | -2.4970780760 |
| H17  | -1.7899818400 | -3.0122134213 | -1.6310120439 |
| H18  | -2.3448732588 | -2.6750402869 | -4.0018765889 |
| H19  | 1.7816422461  | -2.0017592358 | -4.8628995476 |
| H20  | -0.5601115265 | -2.1562329340 | -5.6282763720 |
| C1   | 0.5677714222  | -0.5074561645 | 0.4336493303  |
| H5   | 1.5802783124  | -0.5505269015 | 0.8402390685  |
| H6   | 0.6558736629  | -0.2175416456 | -0.6088435807 |
| C3   | 2.8070428603  | 4.1983759363  | -0.5604794150 |
| C26  | 1.7923657031  | 3.4110711813  | 1.4677798769  |
| C27  | 0.9824585662  | 2.6308465889  | -0.6519969273 |
| C28  | 1.9254954757  | 3.4145041743  | -1.2967484498 |
| C29  | 2.7309857208  | 4.2007778211  | 0.8223821304  |
| H1   | 1.7459445767  | 3.3977291757  | 2.5379712574  |
| H2   | 0.2862125744  | 2.0466037166  | -1.2287363733 |
| H3   | 1.9713578203  | 3.4151297035  | -2.3708451625 |
| H9   | 3.4096713505  | 4.8073562604  | 1.3990774035  |
| H10  | 3.5437855062  | 4.8042079101  | -1.0617698905 |
| H25  | -1.0891245347 | 3.1494999185  | 2.7854402047  |

nuclear repulsion energy..... 1970.392406452 hartrees

/ end of geometry optimization iteration 10 /

end of program geopt

start of program onee

smallest eigenvalue of S: 2.841E-04

number of canonical orbitals..... 461

end of program onee

start of program probe

end of program probe

start of program grid

number of gridpoints:

|     | atom     | N1  | N2  | C4  | C5  | C6  | C7  | C13 |
|-----|----------|-----|-----|-----|-----|-----|-----|-----|
| H4  |          |     |     |     |     |     |     |     |
|     | grid # 1 | 96  | 102 | 87  | 88  | 90  | 89  | 84  |
| 73  |          |     |     |     |     |     |     |     |
|     | grid # 2 | 103 | 112 | 95  | 95  | 99  | 97  | 92  |
| 118 |          |     |     |     |     |     |     |     |
|     | grid # 3 | 213 | 227 | 195 | 187 | 191 | 200 | 163 |
| 224 |          |     |     |     |     |     |     |     |
|     | grid # 4 | 389 | 414 | 323 | 320 | 321 | 351 | 300 |
| 224 |          |     |     |     |     |     |     |     |

number of gridpoints:

|     | atom     | C8  | C11 | H7  | C9  | H8  | C10 | C12 |
|-----|----------|-----|-----|-----|-----|-----|-----|-----|
| C2  |          |     |     |     |     |     |     |     |
|     | grid # 1 | 89  | 86  | 73  | 87  | 73  | 89  | 86  |
| 92  |          |     |     |     |     |     |     |     |
|     | grid # 2 | 97  | 94  | 118 | 97  | 118 | 97  | 94  |
| 100 |          |     |     |     |     |     |     |     |
|     | grid # 3 | 184 | 185 | 223 | 184 | 222 | 184 | 195 |
| 195 |          |     |     |     |     |     |     |     |
|     | grid # 4 | 328 | 331 | 226 | 331 | 223 | 329 | 318 |
| 342 |          |     |     |     |     |     |     |     |

number of gridpoints:

|     | atom     | H13 | C14 | H15 | C15 | C16 | C17 | C18 |
|-----|----------|-----|-----|-----|-----|-----|-----|-----|
| C19 |          |     |     |     |     |     |     |     |
|     | grid # 1 | 69  | 91  | 69  | 89  | 88  | 88  | 89  |
| 89  |          |     |     |     |     |     |     |     |
|     | grid # 2 | 109 | 100 | 110 | 97  | 96  | 96  | 97  |
| 96  |          |     |     |     |     |     |     |     |
|     | grid # 3 | 210 | 197 | 216 | 183 | 184 | 183 | 184 |
| 183 |          |     |     |     |     |     |     |     |
|     | grid # 4 | 213 | 342 | 213 | 327 | 329 | 327 | 327 |
| 329 |          |     |     |     |     |     |     |     |

number of gridpoints:

|     |          |     |     |     |     |     |     |     |
|-----|----------|-----|-----|-----|-----|-----|-----|-----|
|     | atom     | H16 | H17 | H18 | H19 | H20 | C1  | H5  |
| H6  |          |     |     |     |     |     |     |     |
| 69  | grid # 1 | 73  | 73  | 73  | 73  | 73  | 82  | 70  |
| 104 | grid # 2 | 113 | 115 | 118 | 118 | 118 | 89  | 110 |
| 207 | grid # 3 | 214 | 216 | 223 | 222 | 224 | 165 | 217 |
| 206 | grid # 4 | 214 | 214 | 224 | 223 | 224 | 293 | 219 |

number of gridpoints:

|     |          |     |     |     |     |     |     |     |
|-----|----------|-----|-----|-----|-----|-----|-----|-----|
|     | atom     | C3  | C26 | C27 | C28 | C29 | H1  | H2  |
| H3  |          |     |     |     |     |     |     |     |
| 73  | grid # 1 | 89  | 88  | 88  | 89  | 89  | 72  | 71  |
| 118 | grid # 2 | 97  | 95  | 96  | 97  | 97  | 115 | 114 |
| 223 | grid # 3 | 184 | 182 | 184 | 184 | 185 | 217 | 212 |
| 224 | grid # 4 | 329 | 328 | 329 | 327 | 329 | 216 | 212 |

number of gridpoints:

|          |      |     |     |     |       |
|----------|------|-----|-----|-----|-------|
|          | atom | H9  | H10 | H25 | total |
| grid # 1 |      | 73  | 73  | 72  | 3519  |
| grid # 2 |      | 118 | 118 | 115 | 4492  |
| grid # 3 |      | 222 | 223 | 220 | 8636  |
| grid # 4 |      | 224 | 224 | 224 | 12260 |

end of program grid

start of program rwr  
end of program rwr

start of program scf

|      | i | u | d | i | g |                  |         | RMS     | maximum |
|------|---|---|---|---|---|------------------|---------|---------|---------|
|      | t | p | i | c | r |                  |         | density | DIIS    |
|      | e | d | i | u | i |                  | energy  | change  | error   |
|      | r | t | s | t | d | total energy     | change  |         |         |
| etot | 1 | N | N | 2 | U | -990.29802142608 |         | 4.7E-04 | 3.6E-02 |
| etot | 2 | Y | Y | 6 | M | -990.37914076540 | 8.1E-02 | 2.4E-04 | 1.5E-02 |
| etot | 3 | N | Y | 2 | U | -990.39011714517 | 1.1E-02 | 7.3E-05 | 3.6E-03 |
| etot | 4 | Y | Y | 6 | M | -990.39075170470 | 6.3E-04 | 1.8E-05 | 8.3E-04 |
| etot | 5 | Y | Y | 6 | M | -990.39080716088 | 5.5E-05 | 9.2E-06 | 2.4E-04 |
| etot | 6 | N | Y | 2 | U | -990.39081625073 | 9.1E-06 | 3.2E-06 | 6.3E-05 |
| etot | 7 | Y | N | 6 | M | -990.39082059817 | 4.3E-06 | 0.0E+00 | 0.0E+00 |

Energy components, in hartrees:

|     |                               |                   |       |
|-----|-------------------------------|-------------------|-------|
| (A) | Nuclear repulsion.....        | 1970.39240645220  |       |
| (E) | Total one-electron terms..... | -5259.04946585476 |       |
| (I) | Total two-electron terms..... | 2298.26623880439  |       |
| (L) | Electronic energy.....        | -2960.78322705037 | (E+I) |
| (N) | Total energy.....             | -990.39082059817  | (A+L) |

SCFE: SCF energy: HF -990.39082059817 hartrees iterations:

7

HOMO energy: -0.26884

LUMO energy: 0.09625

Orbital energies:

|           |           |           |           |           |           |
|-----------|-----------|-----------|-----------|-----------|-----------|
| -15.60520 | -15.56542 | -11.29634 | -11.28757 | -11.27197 | -11.25137 |
| -11.25137 | -11.24663 | -11.24624 | -11.24028 | -11.24014 | -11.23939 |
| -11.23864 | -11.23804 | -11.23717 | -11.23626 | -11.23525 | -11.23435 |
| -11.23339 | -11.23131 | -11.22496 | -11.22092 | -11.21941 | -11.21652 |
| -11.21351 | -1.32467  | -1.25038  | -1.16266  | -1.16009  | -1.13785  |
| -1.07415  | -1.06682  | -1.03876  | -1.02160  | -1.01902  | -1.01676  |
| -0.97049  | -0.95423  | -0.93360  | -0.85986  | -0.83666  | -0.83382  |
| -0.82912  | -0.80693  | -0.79529  | -0.76986  | -0.73238  | -0.71725  |
| -0.70084  | -0.69840  | -0.66614  | -0.65779  | -0.64278  | -0.63724  |
| -0.63391  | -0.62371  | -0.62052  | -0.61551  | -0.59631  | -0.59205  |
| -0.59042  | -0.58760  | -0.57799  | -0.55757  | -0.55200  | -0.54823  |
| -0.54488  | -0.51728  | -0.50751  | -0.50254  | -0.49998  | -0.49565  |
| -0.49359  | -0.49112  | -0.48733  | -0.48118  | -0.42972  | -0.40500  |
| -0.36774  | -0.34301  | -0.34117  | -0.33775  | -0.32916  | -0.28213  |
| -0.26884  | 0.09625   | 0.12876   | 0.13660   | 0.13709   | 0.14832   |
| 0.17835   | 0.20865   | 0.22790   | 0.23513   | 0.24117   |           |

end of program scf

start of program der1a

end of program der1a

start of program rwr

end of program rwr

start of program der1b

forces (hartrees/bohr) : total

| atom | label | x             | y             | z            |
|------|-------|---------------|---------------|--------------|
| 1    | N1    | 3.176707E-04  | -7.109467E-05 | 1.405262E-05 |
| 2    | N2    | -1.075429E-03 | -2.083377E-04 | 7.417913E-04 |



|       |     |               |               |               |
|-------|-----|---------------|---------------|---------------|
| 3     | C4  | -9.732657E-04 | 1.912845E-03  | 4.219490E-04  |
| 4     | C5  | 9.390608E-04  | -3.118005E-04 | -6.400202E-04 |
| 5     | C6  | -1.872859E-03 | 6.288692E-04  | 1.567042E-03  |
| 6     | C7  | 8.574249E-04  | -1.220477E-03 | -4.534514E-04 |
| 7     | C13 | 4.990676E-05  | 2.619141E-04  | -1.067732E-03 |
| 8     | H4  | 2.212391E-04  | 7.436348E-04  | 4.175358E-05  |
| 9     | C8  | 9.716663E-04  | 1.126067E-03  | -2.443932E-04 |
| 10    | C11 | -3.058807E-04 | -1.016420E-03 | -2.792513E-05 |
| 11    | H7  | 2.030616E-04  | -3.912862E-04 | -4.531555E-04 |
| 12    | C9  | 3.885238E-04  | -1.817448E-03 | -8.541092E-04 |
| 13    | H8  | 5.647280E-04  | 1.033803E-04  | -4.236539E-04 |
| 14    | C10 | 1.787747E-04  | 1.629413E-04  | -1.130833E-04 |
| 15    | C12 | -2.993285E-04 | 9.293299E-04  | -8.305882E-04 |
| 16    | C2  | 2.106919E-03  | 3.714443E-04  | 1.529857E-03  |
| 17    | H13 | -8.453989E-06 | -1.369249E-05 | -3.866099E-04 |
| 18    | C14 | -2.620975E-03 | -8.478820E-04 | -2.750261E-04 |
| 19    | H15 | 1.703486E-04  | 2.476269E-04  | 5.668823E-04  |
| 20    | C15 | 1.348587E-03  | 3.170487E-04  | -3.143626E-04 |
| 21    | C16 | -3.287963E-03 | -8.576557E-04 | -7.679380E-04 |
| 22    | C17 | 9.274778E-04  | 5.528706E-04  | 2.811386E-05  |
| 23    | C18 | -2.653106E-04 | -1.756854E-04 | 1.189448E-03  |
| 24    | C19 | -2.378424E-03 | -1.170097E-03 | 5.057107E-05  |
| 25    | H16 | 3.742774E-03  | 1.309982E-03  | 7.701638E-04  |
| 26    | H17 | 6.077310E-04  | 2.216130E-04  | -3.997413E-04 |
| 27    | H18 | 1.487305E-03  | 2.292942E-04  | 4.715166E-04  |
| 28    | H19 | 5.016746E-04  | 5.351337E-04  | -4.906618E-04 |
| 29    | H20 | 3.420834E-04  | -6.617536E-05 | 7.707523E-04  |
| 30    | C1  | 1.310155E-03  | 1.015916E-03  | -6.323303E-04 |
| 31    | H5  | -1.427620E-03 | -7.688246E-05 | -7.480952E-04 |
| 32    | H6  | -2.814998E-05 | -3.196540E-04 | 2.202996E-03  |
| 33    | C3  | -1.512850E-03 | -7.323179E-04 | -2.557105E-03 |
| 34    | C26 | -1.040007E-03 | -4.215451E-04 | -2.994571E-03 |
| 35    | C27 | 2.310941E-04  | 6.193161E-04  | -3.498692E-04 |
| 36    | C28 | 1.620128E-03  | 8.085342E-04  | 2.072791E-03  |
| 37    | C29 | 2.143792E-04  | -9.341659E-05 | 4.237368E-04  |
| 38    | H1  | -3.535759E-05 | -1.816722E-04 | 3.011021E-03  |
| 39    | H2  | 6.170067E-04  | 4.683717E-04  | 1.307347E-04  |
| 40    | H3  | -3.642736E-05 | 2.655682E-04  | -5.930004E-04 |
| 41    | H9  | -9.794912E-04 | -8.053914E-04 | -4.013531E-04 |
| 42    | H10 | -1.162548E-03 | -8.092648E-04 | 1.701950E-04  |
| 43    | H25 | 1.251612E-04  | -4.338929E-04 | -3.335687E-04 |
| ----- |     | -----         | -----         | -----         |
| total |     | 7.345388E-04  | 7.896115E-04  | -1.769761E-04 |

end of program derlb

start of program geopt 11

geometry optimization step 11

reading input hessian of dimension 129

in five columns format

reading input hessian of dimension 129  
in five columns format  
reading input hessian of dimension 129  
in five columns format

Level shifts adjusted to satisfy step-size constraints

Step size: 0.0750415

Cos(theta): 0.6886741

Final level shift: -2.7962975E-02

energy change: -2.9669E-04 . ( 5.0000E-05 )  
gradient maximum: 3.8324E-03 . ( 4.5000E-04 )  
gradient rms: 8.9140E-04 . ( 3.0000E-04 )  
step size: 0.07504 trust radius: 0.07500  
displacement maximum: 2.2233E-02 . ( 1.8000E-03 )  
displacement rms: 5.8958E-03 . ( 1.2000E-03 )  
predicted energy change: -3.7189E-04 geom step: 7.5041E-  
02 full step: 7.5041E-02  
molecular structure not yet converged...

center of mass moved by:

x: -1.1335E-03

y: -2.5596E-03

z: -2.5985E-03

new geometry:

|      | angstroms     |               |               |
|------|---------------|---------------|---------------|
| atom | x             | y             | z             |
| N1   | -0.2525386544 | 0.4310493893  | 1.1683995301  |
| N2   | -1.0138740281 | -2.2939256517 | 1.1975942074  |
| C4   | -1.2252479678 | -0.0341646614 | 1.9952733135  |
| C5   | -0.0436572270 | -1.9157862179 | 0.4851284149  |
| C6   | -1.6413071326 | -1.3541973725 | 2.0405928362  |
| C7   | -1.7145415536 | 0.9821590281  | 2.7923186325  |
| C13  | 0.6288624322  | -2.9244715472 | -0.4211405469 |
| H4   | -2.9999644294 | -2.6702187494 | 2.9946387869  |
| C8   | -2.7426672956 | 0.6546811637  | 3.6920735521  |
| C11  | -0.9497183169 | 2.1459198615  | 2.4208127750  |
| H7   | -3.1762743134 | 1.3992173904  | 4.3355281353  |
| C9   | -3.1879856910 | -0.6483570844 | 3.7409436743  |
| H8   | -3.9728895093 | -0.9095416004 | 4.4272694645  |
| C10  | -2.6429704192 | -1.6600851796 | 2.9242590216  |
| C12  | -0.0716241692 | 1.7744356070  | 1.4512907646  |
| C2   | 0.9269144697  | 2.6056206604  | 0.7453112864  |
| H13  | 1.7074422886  | -2.8817125614 | -0.2753663900 |
| C14  | 0.3076938336  | -2.7045928872 | -1.8905668910 |
| H15  | 0.2923378719  | -3.9050788522 | -0.1052980764 |
| C15  | -0.3053244872 | -2.3158522487 | -4.5878771164 |
| C16  | 1.3069751907  | -2.4063165422 | -2.8077883962 |
| C17  | -1.0079025385 | -2.8063076055 | -2.3422753578 |
| C18  | -1.3113854749 | -2.6134522525 | -3.6776129076 |
| C19  | 1.0025465289  | -2.2143970874 | -4.1491423166 |

|     |               |               |               |
|-----|---------------|---------------|---------------|
| H16 | 2.3309432563  | -2.3188574629 | -2.4786269976 |
| H17 | -1.7917111891 | -3.0332743005 | -1.6406619581 |
| H18 | -2.3295554842 | -2.6925171880 | -4.0106917005 |
| H19 | 1.7907633063  | -1.9834667927 | -4.8460183616 |
| H20 | -0.5422240742 | -2.1661899720 | -5.6255384105 |
| C1  | 0.5644095491  | -0.5120677085 | 0.4353968420  |
| H5  | 1.5708233822  | -0.5629812851 | 0.8428439319  |
| H6  | 0.6581057935  | -0.2218487346 | -0.5998173568 |
| C3  | 2.7889171356  | 4.2151427700  | -0.5660685035 |
| C26 | 1.8162112152  | 3.3890211368  | 1.4702869848  |
| C27 | 0.9775928654  | 2.6431062201  | -0.6456130349 |
| C28 | 1.9045321762  | 3.4402657775  | -1.2949648747 |
| C29 | 2.7395960663  | 4.1914658022  | 0.8181678154  |
| H1  | 1.7871549220  | 3.3588554939  | 2.5468422945  |
| H2  | 0.2728790876  | 2.0718618690  | -1.2204641568 |
| H3  | 1.9264167737  | 3.4627840599  | -2.3698183664 |
| H9  | 3.4212751180  | 4.7898184578  | 1.3932077598  |
| H10 | 3.5069237148  | 4.8342820442  | -1.0716438394 |
| H25 | -1.0577771051 | 3.1427356635  | 2.7959918279  |

nuclear repulsion energy..... 1971.488097852 hartrees

/ end of geometry optimization iteration 11 /

end of program geopt

start of program onee

smallest eigenvalue of S: 2.800E-04

number of canonical orbitals..... 461

end of program onee

start of program probe

end of program probe

start of program grid

number of gridpoints:

| atom     | N1  | N2  | C4  | C5  | C6  | C7  | C13 |
|----------|-----|-----|-----|-----|-----|-----|-----|
| H4       |     |     |     |     |     |     |     |
| grid # 1 | 96  | 102 | 86  | 88  | 89  | 88  | 84  |
| 73       |     |     |     |     |     |     |     |
| grid # 2 | 103 | 112 | 95  | 95  | 98  | 98  | 92  |
| 118      |     |     |     |     |     |     |     |
| grid # 3 | 214 | 227 | 195 | 186 | 190 | 199 | 164 |
| 224      |     |     |     |     |     |     |     |
| grid # 4 | 389 | 414 | 322 | 321 | 325 | 347 | 300 |
| 224      |     |     |     |     |     |     |     |

| number of gridpoints: |          |     |     |     |     |     |     |
|-----------------------|----------|-----|-----|-----|-----|-----|-----|
|                       | atom     | C8  | C11 | H7  | C9  | H8  | C10 |
| C2                    |          |     |     |     |     |     | C12 |
| 92                    | grid # 1 | 89  | 86  | 73  | 87  | 73  | 86  |
| 100                   | grid # 2 | 97  | 94  | 118 | 97  | 118 | 94  |
| 195                   | grid # 3 | 184 | 184 | 223 | 184 | 222 | 194 |
| 343                   | grid # 4 | 330 | 331 | 226 | 329 | 223 | 317 |

| number of gridpoints: |          |     |     |     |     |     |     |
|-----------------------|----------|-----|-----|-----|-----|-----|-----|
|                       | atom     | H13 | C14 | H15 | C15 | C16 | C17 |
| C19                   |          |     |     |     |     |     | C18 |
| 89                    | grid # 1 | 69  | 91  | 69  | 89  | 88  | 89  |
| 96                    | grid # 2 | 110 | 100 | 110 | 97  | 96  | 97  |
| 183                   | grid # 3 | 211 | 196 | 214 | 183 | 184 | 184 |
| 327                   | grid # 4 | 214 | 340 | 215 | 327 | 327 | 327 |

| number of gridpoints: |          |     |     |     |     |     |     |
|-----------------------|----------|-----|-----|-----|-----|-----|-----|
|                       | atom     | H16 | H17 | H18 | H19 | H20 | C1  |
| H6                    |          |     |     |     |     |     | H5  |
| 69                    | grid # 1 | 72  | 73  | 73  | 73  | 73  | 70  |
| 104                   | grid # 2 | 114 | 115 | 118 | 118 | 118 | 110 |
| 207                   | grid # 3 | 214 | 216 | 222 | 222 | 224 | 217 |
| 202                   | grid # 4 | 214 | 214 | 224 | 223 | 224 | 217 |

| number of gridpoints: |          |     |     |     |     |     |     |
|-----------------------|----------|-----|-----|-----|-----|-----|-----|
|                       | atom     | C3  | C26 | C27 | C28 | C29 | H1  |
| H3                    |          |     |     |     |     |     | H2  |
| 73                    | grid # 1 | 89  | 89  | 88  | 89  | 89  | 71  |
| 118                   | grid # 2 | 97  | 95  | 96  | 97  | 97  | 114 |
| 222                   | grid # 3 | 185 | 182 | 184 | 185 | 184 | 214 |
| 224                   | grid # 4 | 328 | 327 | 331 | 327 | 328 | 212 |

| number of gridpoints: |          |     |     |     |       |
|-----------------------|----------|-----|-----|-----|-------|
|                       | atom     | H9  | H10 | H25 | total |
|                       | grid # 1 | 73  | 73  | 72  | 3516  |
|                       | grid # 2 | 118 | 118 | 115 | 4493  |

```

grid # 3      223      223      220      8631
grid # 4      224      224      224     12247

```

end of program grid

```

start of program rwr
end of program rwr

```

start of program scf

|      | i | u | d | i | g |                  | energy  | RMS     | maximum |
|------|---|---|---|---|---|------------------|---------|---------|---------|
|      | t | p | i | c | r |                  | change  | density | DIIS    |
|      | e | d | i | u | i |                  |         | change  | error   |
|      | r | t | s | t | d | total energy     |         |         |         |
| etot | 1 | N | N | 1 | U | -990.38859773819 |         | 8.1E-05 | 3.6E-03 |
| etot | 2 | Y | Y | 4 | M | -990.39048554750 | 1.9E-03 | 3.8E-05 | 1.4E-03 |
| etot | 3 | Y | Y | 4 | M | -990.39075521604 | 2.7E-04 | 1.1E-05 | 3.8E-04 |
| etot | 4 | N | Y | 1 | U | -990.39078219283 | 2.7E-05 | 6.5E-06 | 1.5E-04 |
| etot | 5 | Y | Y | 4 | M | -990.39078684366 | 4.7E-06 | 1.8E-06 | 3.2E-05 |
| etot | 6 | Y | N | 4 | M | -990.39078874833 | 1.9E-06 | 0.0E+00 | 0.0E+00 |

Energy components, in hartrees:

```

(A) Nuclear repulsion..... 1971.48809785247
(E) Total one-electron terms..... -5261.23708829039
(I) Total two-electron terms..... 2299.35820168958
(L) Electronic energy..... -2961.87888660080 (E+I)
(N) Total energy..... -990.39078874833 (A+L)

```

```

SCFE: SCF energy: HF      -990.39078874833 hartrees   iterations:
6

```

```

HOMO energy:      -0.26900
LUMO energy:       0.09681

```

Orbital energies:

|           |           |           |           |           |           |
|-----------|-----------|-----------|-----------|-----------|-----------|
| -15.60450 | -15.56520 | -11.29613 | -11.28583 | -11.27124 | -11.25060 |
| -11.25060 | -11.24629 | -11.24564 | -11.24013 | -11.23934 | -11.23862 |
| -11.23812 | -11.23741 | -11.23665 | -11.23611 | -11.23489 | -11.23442 |
| -11.23272 | -11.23078 | -11.22433 | -11.21958 | -11.21829 | -11.21571 |
| -11.21257 | -1.32518  | -1.24924  | -1.16401  | -1.16055  | -1.13914  |
| -1.07477  | -1.06714  | -1.04013  | -1.02193  | -1.01901  | -1.01706  |
| -0.97170  | -0.95432  | -0.93398  | -0.86039  | -0.83766  | -0.83356  |
| -0.82897  | -0.80722  | -0.79561  | -0.77030  | -0.73280  | -0.71772  |
| -0.70154  | -0.69847  | -0.66672  | -0.65798  | -0.64297  | -0.63737  |
| -0.63423  | -0.62375  | -0.62103  | -0.61586  | -0.59622  | -0.59244  |
| -0.59059  | -0.58747  | -0.57852  | -0.55830  | -0.55278  | -0.54840  |
| -0.54412  | -0.51758  | -0.50739  | -0.50284  | -0.50056  | -0.49599  |

|          |          |          |          |          |          |
|----------|----------|----------|----------|----------|----------|
| -0.49355 | -0.49122 | -0.48722 | -0.48146 | -0.42973 | -0.40470 |
| -0.36763 | -0.34405 | -0.34100 | -0.33769 | -0.32924 | -0.28262 |
| -0.26900 | 0.09681  | 0.12911  | 0.13706  | 0.13737  | 0.14842  |
| 0.17898  | 0.20870  | 0.22842  | 0.23520  | 0.24150  |          |

end of program scf

start of program der1a  
end of program der1a

start of program rwr  
end of program rwr

start of program der1b

forces (hartrees/bohr) : total

| atom | label | x             | y             | z             |
|------|-------|---------------|---------------|---------------|
| 1    | N1    | 7.004627E-04  | -5.345029E-04 | -8.693736E-04 |
| 2    | N2    | 1.325105E-03  | 4.490218E-04  | -1.207276E-03 |
| 3    | C4    | 6.466353E-04  | -1.748891E-03 | -5.276414E-04 |
| 4    | C5    | -1.583901E-03 | -5.770104E-05 | 1.464054E-03  |
| 5    | C6    | 2.273493E-03  | -1.141576E-03 | -2.212237E-03 |
| 6    | C7    | -6.504121E-04 | 1.484241E-03  | 1.389573E-04  |
| 7    | C13   | -1.049263E-04 | -1.124955E-03 | 1.171673E-03  |
| 8    | H4    | -4.026407E-04 | -9.691760E-04 | -5.464798E-05 |
| 9    | C8    | -9.303924E-04 | -6.391797E-04 | 4.551451E-04  |
| 10   | C11   | 6.920090E-04  | 1.520404E-03  | 3.671516E-04  |
| 11   | H7    | -7.863954E-05 | 4.226999E-04  | 2.440591E-04  |
| 12   | C9    | -2.025401E-04 | 1.476436E-03  | 5.741089E-04  |
| 13   | H8    | -5.400360E-04 | -1.340263E-04 | 4.904071E-04  |
| 14   | C10   | -7.800840E-05 | -1.362858E-04 | 6.780081E-04  |
| 15   | C12   | -2.323231E-04 | -3.858693E-04 | 8.130474E-04  |
| 16   | C2    | -1.650918E-03 | -1.050059E-03 | -4.870314E-04 |
| 17   | H13   | -1.249323E-03 | 3.298007E-04  | -3.456024E-04 |
| 18   | C14   | 3.372735E-04  | 3.524076E-05  | -8.065477E-04 |
| 19   | H15   | 3.415639E-04  | 3.736382E-04  | -5.501722E-04 |
| 20   | C15   | -7.211408E-05 | -4.291507E-04 | 1.165413E-03  |
| 21   | C16   | 1.485377E-04  | 5.669822E-04  | 3.571922E-04  |
| 22   | C17   | 9.294633E-04  | 4.954721E-05  | 8.698192E-04  |
| 23   | C18   | 1.506381E-03  | 3.791037E-04  | -2.957498E-04 |
| 24   | C19   | 1.342766E-03  | 5.454351E-04  | -6.709570E-04 |
| 25   | H16   | -1.552766E-03 | -6.560598E-04 | -2.441234E-04 |
| 26   | H17   | 1.700841E-04  | -9.802381E-05 | 1.903320E-04  |
| 27   | H18   | -1.365794E-03 | -2.753192E-04 | -2.401760E-04 |
| 28   | H19   | -6.056477E-04 | -1.969351E-04 | 3.560983E-04  |
| 29   | H20   | -1.099160E-04 | 1.214393E-04  | -7.279111E-04 |
| 30   | C1    | -1.851382E-03 | -1.238949E-04 | 1.290145E-03  |

|       |       |               |               |               |
|-------|-------|---------------|---------------|---------------|
| 31    | H5    | 1.574782E-03  | 1.314021E-04  | 1.035441E-03  |
| 32    | H6    | 3.969414E-04  | 6.577154E-04  | -2.503026E-03 |
| 33    | C3    | 1.115385E-03  | 1.071782E-03  | 1.756491E-03  |
| 34    | C26   | 1.717762E-03  | 1.497857E-03  | 2.251613E-03  |
| 35    | C27   | 3.012996E-04  | 7.204426E-04  | -9.322043E-04 |
| 36    | C28   | -1.972431E-03 | -1.672589E-03 | -1.659435E-03 |
| 37    | C29   | -8.471681E-04 | -7.644455E-04 | 8.396384E-04  |
| 38    | H1    | 2.871811E-04  | 2.205505E-04  | -1.629586E-03 |
| 39    | H2    | -7.152317E-04 | -9.510178E-04 | -5.023593E-04 |
| 40    | H3    | 1.101136E-05  | -8.687548E-05 | -4.894680E-04 |
| 41    | H9    | 1.039112E-03  | 8.927797E-04  | 5.902413E-04  |
| 42    | H10   | 7.541013E-04  | 6.428744E-04  | -3.083269E-04 |
| 43    | H25   | -2.161468E-04 | 5.428347E-04  | 2.594211E-04  |
| ----- |       |               |               |               |
|       | total | 5.986926E-04  | 9.556962E-04  | 9.460540E-05  |

end of program derlb

start of program geopt 12

geometry optimization step 12

reading input hessian of dimension 129

in five columns format

reading input hessian of dimension 129

in five columns format

Level shifts adjusted to satisfy step-size constraints

Step size: 0.0381814

Cos(theta): 0.6358626

Final level shift: -2.2947896E-02

energy change: 3.1850E-05 \* ( 5.0000E-05 )

gradient maximum: 3.7159E-03 . ( 4.5000E-04 )

gradient rms: 7.8551E-04 . ( 3.0000E-04 )

step size: 0.03818 trust radius: 0.03750

displacement maximum: 1.1555E-02 . ( 1.8000E-03 )

displacement rms: 2.9998E-03 . ( 1.2000E-03 )

predicted energy change: -1.3809E-04 geom step: 3.8181E-

02 full step: 3.8181E-02

molecular structure not yet converged...

center of mass moved by:

x: 4.5426E-04 y: 8.1147E-04 z: -6.7642E-04

new geometry:

|      | angstroms     |               |              |
|------|---------------|---------------|--------------|
| atom | x             | y             | z            |
| N1   | -0.2481100487 | 0.4334566292  | 1.1690590843 |
| N2   | -1.0032005669 | -2.2934581620 | 1.1949409475 |

|     |               |               |               |
|-----|---------------|---------------|---------------|
| C4  | -1.2219414340 | -0.0343838020 | 1.9923563545  |
| C5  | -0.0339796710 | -1.9120602342 | 0.4839591872  |
| C6  | -1.6327378826 | -1.3563177585 | 2.0371288910  |
| C7  | -1.7214706152 | 0.9842720805  | 2.7832559656  |
| C13 | 0.6387689584  | -2.9205192316 | -0.4241415240 |
| H4  | -2.9960643356 | -2.6736608684 | 2.9862523038  |
| C8  | -2.7543266162 | 0.6556694707  | 3.6773710238  |
| C11 | -0.9567330317 | 2.1503186557  | 2.4169640341  |
| H7  | -3.1942470497 | 1.4021628828  | 4.3154141299  |
| C9  | -3.1938710405 | -0.6480229029 | 3.7284797792  |
| H8  | -3.9830026483 | -0.9107663027 | 4.4110346409  |
| C10 | -2.6387220303 | -1.6617110159 | 2.9180186584  |
| C12 | -0.0739060768 | 1.7781436478  | 1.4520699323  |
| C2  | 0.9254724195  | 2.6102272532  | 0.7486369541  |
| H13 | 1.7151095547  | -2.8707079086 | -0.2840967415 |
| C14 | 0.3101739106  | -2.7047976511 | -1.8919547337 |
| H15 | 0.3108881878  | -3.9021230759 | -0.1082165064 |
| C15 | -0.3249288630 | -2.3285963028 | -4.5840286299 |
| C16 | 1.2990880581  | -2.4022115814 | -2.8172990363 |
| C17 | -1.0064246650 | -2.8179513158 | -2.3322450242 |
| C18 | -1.3210023891 | -2.6315174078 | -3.6652839004 |
| C19 | 0.9856382061  | -2.2157562838 | -4.1570604658 |
| H16 | 2.3222336572  | -2.3129300127 | -2.4940718207 |
| H17 | -1.7807423369 | -3.0503320668 | -1.6229685692 |
| H18 | -2.3412419940 | -2.7221754401 | -3.9894950791 |
| H19 | 1.7641119017  | -1.9818956103 | -4.8615237321 |
| H20 | -0.5712857690 | -2.1834408899 | -5.6215168996 |
| C1  | 0.5743863458  | -0.5077215009 | 0.4405346425  |
| H5  | 1.5783628755  | -0.5595077770 | 0.8633906677  |
| H6  | 0.6828551014  | -0.2141085169 | -0.5964581000 |
| C3  | 2.7976584351  | 4.2167944296  | -0.5536768887 |
| C26 | 1.8195941604  | 3.3876491689  | 1.4793453416  |
| C27 | 0.9766033142  | 2.6525116204  | -0.6445526402 |
| C28 | 1.9079513036  | 3.4480386227  | -1.2902513713 |
| C29 | 2.7477220187  | 4.1880060271  | 0.8321252429  |
| H1  | 1.7898857173  | 3.3527087763  | 2.5543504826  |
| H2  | 0.2700912980  | 2.0817515541  | -1.2208892319 |
| H3  | 1.9329210192  | 3.4750874837  | -2.3661874570 |
| H9  | 3.4352847020  | 4.7809146017  | 1.4097776804  |
| H10 | 3.5220132279  | 4.8352318702  | -1.0559521854 |
| H25 | -1.0710358057 | 3.1480250996  | 2.7899724688  |

nuclear repulsion energy..... 1971.062170283 hartrees

/ end of geometry optimization iteration 12 /

end of program geopt

start of program onee  
smallest eigenvalue of S: 2.810E-04



number of canonical orbitals..... 461  
end of program onee

start of program probe  
end of program probe

start of program grid

number of gridpoints:

| atom     | N1  | N2  | C4  | C5  | C6  | C7  | C13 |
|----------|-----|-----|-----|-----|-----|-----|-----|
| H4       |     |     |     |     |     |     |     |
| grid # 1 | 95  | 102 | 87  | 87  | 90  | 89  | 84  |
| 73       |     |     |     |     |     |     |     |
| grid # 2 | 103 | 112 | 95  | 95  | 99  | 98  | 92  |
| 118      |     |     |     |     |     |     |     |
| grid # 3 | 214 | 227 | 195 | 187 | 191 | 199 | 163 |
| 224      |     |     |     |     |     |     |     |
| grid # 4 | 385 | 414 | 321 | 320 | 323 | 348 | 299 |
| 224      |     |     |     |     |     |     |     |

number of gridpoints:

| atom     | C8  | C11 | H7  | C9  | H8  | C10 | C12 |
|----------|-----|-----|-----|-----|-----|-----|-----|
| C2       |     |     |     |     |     |     |     |
| grid # 1 | 89  | 86  | 73  | 87  | 73  | 89  | 86  |
| 92       |     |     |     |     |     |     |     |
| grid # 2 | 97  | 94  | 118 | 97  | 118 | 97  | 94  |
| 100      |     |     |     |     |     |     |     |
| grid # 3 | 184 | 185 | 223 | 184 | 222 | 184 | 194 |
| 195      |     |     |     |     |     |     |     |
| grid # 4 | 328 | 331 | 226 | 331 | 223 | 329 | 317 |
| 343      |     |     |     |     |     |     |     |

number of gridpoints:

| atom     | H13 | C14 | H15 | C15 | C16 | C17 | C18 |
|----------|-----|-----|-----|-----|-----|-----|-----|
| C19      |     |     |     |     |     |     |     |
| grid # 1 | 69  | 91  | 69  | 89  | 88  | 87  | 89  |
| 89       |     |     |     |     |     |     |     |
| grid # 2 | 109 | 100 | 110 | 97  | 96  | 96  | 97  |
| 96       |     |     |     |     |     |     |     |
| grid # 3 | 211 | 196 | 214 | 183 | 184 | 182 | 184 |
| 183      |     |     |     |     |     |     |     |
| grid # 4 | 214 | 340 | 213 | 327 | 327 | 327 | 327 |
| 327      |     |     |     |     |     |     |     |

number of gridpoints:

| atom     | H16 | H17 | H18 | H19 | H20 | C1 | H5 |
|----------|-----|-----|-----|-----|-----|----|----|
| H6       |     |     |     |     |     |    |    |
| grid # 1 | 72  | 73  | 73  | 73  | 73  | 82 | 70 |
| 69       |     |     |     |     |     |    |    |

|          |     |     |     |     |     |     |     |
|----------|-----|-----|-----|-----|-----|-----|-----|
| grid # 2 | 114 | 114 | 118 | 118 | 118 | 88  | 109 |
| 104      |     |     |     |     |     |     |     |
| grid # 3 | 214 | 216 | 222 | 221 | 224 | 164 | 217 |
| 207      |     |     |     |     |     |     |     |
| grid # 4 | 214 | 214 | 224 | 223 | 224 | 292 | 219 |
| 206      |     |     |     |     |     |     |     |

number of gridpoints:

|          |     |     |     |     |     |     |     |
|----------|-----|-----|-----|-----|-----|-----|-----|
| atom     | C3  | C26 | C27 | C28 | C29 | H1  | H2  |
| H3       |     |     |     |     |     |     |     |
| grid # 1 | 89  | 88  | 88  | 89  | 89  | 72  | 71  |
| 73       |     |     |     |     |     |     |     |
| grid # 2 | 97  | 95  | 96  | 97  | 97  | 115 | 114 |
| 118      |     |     |     |     |     |     |     |
| grid # 3 | 185 | 182 | 184 | 185 | 185 | 217 | 213 |
| 223      |     |     |     |     |     |     |     |
| grid # 4 | 328 | 327 | 330 | 328 | 328 | 217 | 212 |
| 224      |     |     |     |     |     |     |     |

number of gridpoints:

|          |     |     |     |       |
|----------|-----|-----|-----|-------|
| atom     | H9  | H10 | H25 | total |
| grid # 1 | 73  | 73  | 72  | 3515  |
| grid # 2 | 118 | 118 | 115 | 4491  |
| grid # 3 | 223 | 224 | 220 | 8634  |
| grid # 4 | 224 | 224 | 224 | 12246 |

end of program grid

start of program rwr  
end of program rwr

start of program scf

|      | i | u | d | i | g |                  |         | RMS     | maximum |
|------|---|---|---|---|---|------------------|---------|---------|---------|
|      | t | p | i | c | r |                  |         | density | DIIS    |
|      | e | d | i | u | i |                  | energy  | change  | error   |
|      | r | t | s | t | d | total energy     | change  |         |         |
| etot | 1 | N | N | 1 | U | -990.39028009303 |         | 4.3E-05 | 2.4E-03 |
| etot | 2 | Y | Y | 4 | M | -990.39078089231 | 5.0E-04 | 1.8E-05 | 5.5E-04 |
| etot | 3 | Y | Y | 4 | M | -990.39083518771 | 5.4E-05 | 4.9E-06 | 1.2E-04 |
| etot | 4 | Y | N | 4 | M | -990.39084155577 | 6.4E-06 | 0.0E+00 | 0.0E+00 |

Energy components, in hartrees:

|     |                               |                   |       |
|-----|-------------------------------|-------------------|-------|
| (A) | Nuclear repulsion.....        | 1971.06217028341  |       |
| (E) | Total one-electron terms..... | -5260.39454868744 |       |
| (I) | Total two-electron terms..... | 2298.94153684826  |       |
| (L) | Electronic energy.....        | -2961.45301183918 | (E+I) |
| (N) | Total energy.....             | -990.39084155577  | (A+L) |

SCFE: SCF energy: HF -990.39084155577 hartrees iterations:  
4

HOMO energy: -0.26906  
LUMO energy: 0.09673

Orbital energies:

|           |           |           |           |           |           |
|-----------|-----------|-----------|-----------|-----------|-----------|
| -15.60462 | -15.56496 | -11.29644 | -11.28704 | -11.27124 | -11.25104 |
| -11.25071 | -11.24585 | -11.24537 | -11.24021 | -11.23959 | -11.23927 |
| -11.23874 | -11.23808 | -11.23742 | -11.23573 | -11.23438 | -11.23415 |
| -11.23269 | -11.23001 | -11.22431 | -11.22021 | -11.21853 | -11.21599 |
| -11.21287 | -1.32532  | -1.24973  | -1.16308  | -1.16069  | -1.13877  |
| -1.07464  | -1.06716  | -1.03922  | -1.02184  | -1.01901  | -1.01724  |
| -0.97091  | -0.95440  | -0.93382  | -0.86015  | -0.83698  | -0.83354  |
| -0.82928  | -0.80716  | -0.79551  | -0.77003  | -0.73266  | -0.71746  |
| -0.70102  | -0.69855  | -0.66633  | -0.65789  | -0.64293  | -0.63722  |
| -0.63387  | -0.62365  | -0.62070  | -0.61586  | -0.59633  | -0.59238  |
| -0.59043  | -0.58757  | -0.57842  | -0.55802  | -0.55233  | -0.54821  |
| -0.54447  | -0.51739  | -0.50720  | -0.50256  | -0.50022  | -0.49593  |
| -0.49341  | -0.49120  | -0.48742  | -0.48125  | -0.42975  | -0.40484  |
| -0.36746  | -0.34335  | -0.34121  | -0.33758  | -0.32931  | -0.28234  |
| -0.26906  | 0.09673   | 0.12890   | 0.13698   | 0.13758   | 0.14860   |
| 0.17856   | 0.20869   | 0.22823   | 0.23521   | 0.24124   |           |

end of program scf

start of program der1a  
end of program der1a

start of program rwr  
end of program rwr

start of program der1b

forces (hartrees/bohr) : total

| atom | label | x             | y             | z             |
|------|-------|---------------|---------------|---------------|
| 1    | N1    | 2.227998E-04  | 3.002457E-04  | -7.633866E-04 |
| 2    | N2    | 8.313377E-04  | 6.278822E-05  | -8.329915E-04 |
| 3    | C4    | -2.749466E-04 | -4.216903E-04 | -5.263447E-07 |
| 4    | C5    | -6.186970E-04 | -7.144881E-04 | 3.670361E-04  |
| 5    | C6    | 2.786252E-04  | 3.974446E-05  | -3.989161E-04 |
| 6    | C7    | 9.204291E-05  | 2.064961E-04  | 1.809267E-04  |
| 7    | C13   | -2.647782E-04 | 7.202521E-04  | 7.337563E-04  |
| 8    | H4    | 4.755602E-05  | 2.153163E-04  | 1.133755E-04  |
| 9    | C8    | -3.968861E-04 | 6.246385E-04  | 6.455230E-04  |

|       |     |               |               |               |
|-------|-----|---------------|---------------|---------------|
| 10    | C11 | 1.871446E-05  | 4.167742E-04  | -1.449800E-04 |
| 11    | H7  | 4.661710E-05  | -2.622866E-05 | 2.075457E-05  |
| 12    | C9  | -4.135986E-04 | -8.043030E-04 | 2.383556E-04  |
| 13    | H8  | 9.219046E-05  | 1.817128E-05  | -3.487273E-05 |
| 14    | C10 | -5.487297E-04 | -5.031939E-04 | 3.007736E-04  |
| 15    | C12 | 4.545402E-04  | 3.326283E-05  | 3.764629E-06  |
| 16    | C2  | 3.716824E-04  | 4.474287E-04  | -1.073648E-03 |
| 17    | H13 | 6.660705E-04  | 2.713936E-04  | -4.580298E-05 |
| 18    | C14 | -9.524221E-06 | -1.503978E-05 | -1.155393E-04 |
| 19    | H15 | -2.589289E-04 | -4.741291E-04 | 1.596626E-04  |
| 20    | C15 | -3.296994E-04 | -8.513451E-05 | -3.637118E-04 |
| 21    | C16 | 5.059299E-04  | 2.273868E-04  | 1.343442E-04  |
| 22    | C17 | 1.784530E-04  | 6.295302E-06  | 3.790300E-04  |
| 23    | C18 | 4.746219E-04  | 1.823099E-04  | -5.954331E-04 |
| 24    | C19 | -1.022632E-04 | 1.979797E-04  | 6.156296E-05  |
| 25    | H16 | 3.316220E-04  | -1.320570E-04 | 5.700000E-06  |
| 26    | H17 | -4.687600E-04 | -9.797374E-05 | 2.750276E-04  |
| 27    | H18 | -1.205098E-03 | -6.438215E-05 | -3.681211E-04 |
| 28    | H19 | 4.370449E-04  | -4.587109E-06 | -2.768543E-05 |
| 29    | H20 | 1.076385E-05  | -4.651129E-05 | 2.680799E-04  |
| 30    | C1  | 1.139672E-03  | 1.536346E-04  | 3.587566E-04  |
| 31    | H5  | -4.346405E-04 | -9.406025E-07 | -3.907024E-04 |
| 32    | H6  | -1.517462E-04 | -9.902310E-05 | 3.357495E-04  |
| 33    | C3  | 1.185490E-04  | 2.269726E-04  | 5.102438E-04  |
| 34    | C26 | -2.577180E-06 | 8.957851E-05  | -5.609457E-05 |
| 35    | C27 | 1.261047E-04  | 2.099169E-04  | 7.317389E-04  |
| 36    | C28 | 2.097073E-04  | 1.577945E-04  | 1.716548E-04  |
| 37    | C29 | 3.597928E-05  | -6.029637E-05 | -9.796868E-04 |
| 38    | H1  | 9.699556E-05  | 7.995279E-05  | -5.711064E-04 |
| 39    | H2  | 8.836115E-05  | -5.681230E-05 | 5.451637E-05  |
| 40    | H3  | -2.236567E-05 | -8.217920E-05 | 5.481682E-04  |
| 41    | H9  | -1.316816E-04 | 3.301862E-05  | -1.580912E-04 |
| 42    | H10 | -5.437240E-04 | -3.859753E-04 | 3.434680E-04  |
| 43    | H25 | -4.214022E-06 | -3.049285E-05 | 3.941865E-06  |
| ----- |     | -----         | -----         | -----         |
| total |     | 6.931218E-04  | 8.159137E-04  | 2.461458E-05  |

end of program der1b

start of program geopt 13

geometry optimization step 13

reading input hessian of dimension 129  
in five columns format  
reading input hessian of dimension 129  
in five columns format

Level shifts adjusted to satisfy step-size constraints

Step size: 0.0192086

Cos(theta): 0.7007821

Final level shift: -6.0023224E-02

energy change: -5.2807E-05 . ( 5.0000E-05 )  
gradient maximum: 1.3227E-03 . ( 4.5000E-04 )  
gradient rms: 3.7901E-04 . ( 3.0000E-04 )  
step size: 0.01921 trust radius: 0.01875  
displacement maximum: 6.9080E-03 . ( 1.8000E-03 )  
displacement rms: 1.5092E-03 . ( 1.2000E-03 )  
predicted energy change: -4.3542E-05 geom step: 1.9209E-  
02 full step: 1.9209E-02  
molecular structure not yet converged...

center of mass moved by:

x: -2.9109E-04 y: 4.6312E-04 z: 3.9301E-04

new geometry:

|      | angstroms     |               |               |
|------|---------------|---------------|---------------|
| atom | x             | y             | z             |
| N1   | -0.2488255692 | 0.4322339843  | 1.1698872896  |
| N2   | -1.0058226391 | -2.2950440448 | 1.1945544518  |
| C4   | -1.2229240041 | -0.0361424909 | 1.9939013709  |
| C5   | -0.0365007616 | -1.9141015496 | 0.4855354067  |
| C6   | -1.6347093114 | -1.3580296563 | 2.0375911084  |
| C7   | -1.7199951420 | 0.9823189968  | 2.7870807318  |
| C13  | 0.6348421100  | -2.9216660268 | -0.4233610698 |
| H4   | -2.9973932708 | -2.6761090969 | 2.9877417657  |
| C8   | -2.7524946331 | 0.6532233934  | 3.6829849331  |
| C11  | -0.9547024201 | 2.1488365611  | 2.4190560905  |
| H7   | -3.1905897249 | 1.3985912480  | 4.3231430452  |
| C9   | -3.1932086574 | -0.6517690880 | 3.7325641745  |
| H8   | -3.9812949477 | -0.9149495298 | 4.4155551603  |
| C10  | -2.6401022769 | -1.6646647698 | 2.9195236102  |
| C12  | -0.0728836370 | 1.7767980278  | 1.4534342970  |
| C2   | 0.9248616477  | 2.6094547063  | 0.7465477863  |
| H13  | 1.7116541383  | -2.8719037968 | -0.2842566294 |
| C14  | 0.3090127646  | -2.7017285669 | -1.8919217197 |
| H15  | 0.3057087418  | -3.9036615388 | -0.1088356875 |
| C15  | -0.3181517155 | -2.3211174476 | -4.5844573536 |
| C16  | 1.3022806045  | -2.4054300452 | -2.8151364504 |
| C17  | -1.0074098438 | -2.8056006886 | -2.3339389563 |
| C18  | -1.3187367817 | -2.6172398029 | -3.6681293975 |
| C19  | 0.9926701615  | -2.2159193741 | -4.1546871043 |
| H16  | 2.3260666979  | -2.3274211924 | -2.4914155295 |
| H17  | -1.7860704955 | -3.0349791182 | -1.6266254226 |
| H18  | -2.3425831130 | -2.7043182588 | -3.9940814180 |
| H19  | 1.7761371458  | -1.9889515630 | -4.8563274949 |
| H20  | -0.5618666539 | -2.1757307323 | -5.6219403179 |
| C1   | 0.5740559454  | -0.5100177170 | 0.4417086690  |
| H5   | 1.5784350739  | -0.5618273663 | 0.8611698811  |
| H6   | 0.6798161828  | -0.2186286872 | -0.5959096950 |
| C3   | 2.7946536701  | 4.2153968164  | -0.5592303079 |

|     |               |              |               |
|-----|---------------|--------------|---------------|
| C26 | 1.8165501131  | 3.3931684312 | 1.4740306347  |
| C27 | 0.9780419294  | 2.6451051479 | -0.6454457865 |
| C28 | 1.9082602778  | 3.4400244963 | -1.2927166344 |
| C29 | 2.7429412688  | 4.1934511473 | 0.8251154766  |
| H1  | 1.7882002850  | 3.3627714017 | 2.5482192846  |
| H2  | 0.2755486666  | 2.0683734653 | -1.2209902818 |
| H3  | 1.9348576060  | 3.4600611274 | -2.3678965230 |
| H9  | 3.4273881104  | 4.7918441078 | 1.4013512856  |
| H10 | 3.5166904418  | 4.8328913912 | -1.0628356014 |
| H25 | -1.0679447669 | 3.1461658281 | 2.7930681050  |

nuclear repulsion energy..... 1971.091366916 hartrees

/ end of geometry optimization iteration 13 /

end of program geopt

start of program onee

smallest eigenvalue of S: 2.824E-04

number of canonical orbitals..... 461

end of program onee

start of program probe

end of program probe

start of program grid

number of gridpoints:

| atom     | N1  | N2  | C4  | C5  | C6  | C7  | C13 |
|----------|-----|-----|-----|-----|-----|-----|-----|
| H4       |     |     |     |     |     |     |     |
| grid # 1 | 96  | 102 | 87  | 87  | 90  | 90  | 84  |
| 73       |     |     |     |     |     |     |     |
| grid # 2 | 103 | 112 | 95  | 95  | 99  | 98  | 92  |
| 118      |     |     |     |     |     |     |     |
| grid # 3 | 214 | 227 | 195 | 187 | 191 | 199 | 163 |
| 224      |     |     |     |     |     |     |     |
| grid # 4 | 389 | 414 | 321 | 320 | 323 | 347 | 299 |
| 224      |     |     |     |     |     |     |     |

number of gridpoints:

| atom     | C8  | C11 | H7  | C9  | H8  | C10 | C12 |
|----------|-----|-----|-----|-----|-----|-----|-----|
| C2       |     |     |     |     |     |     |     |
| grid # 1 | 89  | 86  | 73  | 87  | 73  | 89  | 86  |
| 92       |     |     |     |     |     |     |     |
| grid # 2 | 97  | 94  | 118 | 97  | 118 | 97  | 94  |
| 100      |     |     |     |     |     |     |     |
| grid # 3 | 184 | 185 | 223 | 184 | 222 | 184 | 194 |
| 196      |     |     |     |     |     |     |     |

|          |     |     |     |     |     |     |     |
|----------|-----|-----|-----|-----|-----|-----|-----|
| grid # 4 | 329 | 331 | 226 | 331 | 223 | 329 | 317 |
|----------|-----|-----|-----|-----|-----|-----|-----|

341

|                       |     |     |     |     |     |     |     |
|-----------------------|-----|-----|-----|-----|-----|-----|-----|
| number of gridpoints: |     |     |     |     |     |     |     |
| atom                  | H13 | C14 | H15 | C15 | C16 | C17 | C18 |

C19

|          |    |    |    |    |    |    |    |
|----------|----|----|----|----|----|----|----|
| grid # 1 | 69 | 93 | 69 | 89 | 88 | 88 | 89 |
|----------|----|----|----|----|----|----|----|

89

|          |     |     |     |    |    |    |    |
|----------|-----|-----|-----|----|----|----|----|
| grid # 2 | 109 | 100 | 110 | 97 | 96 | 96 | 97 |
|----------|-----|-----|-----|----|----|----|----|

96

|          |     |     |     |     |     |     |     |
|----------|-----|-----|-----|-----|-----|-----|-----|
| grid # 3 | 210 | 195 | 214 | 183 | 184 | 183 | 184 |
|----------|-----|-----|-----|-----|-----|-----|-----|

183

|          |     |     |     |     |     |     |     |
|----------|-----|-----|-----|-----|-----|-----|-----|
| grid # 4 | 214 | 340 | 213 | 327 | 327 | 327 | 327 |
|----------|-----|-----|-----|-----|-----|-----|-----|

327

|                       |     |     |     |     |     |    |    |
|-----------------------|-----|-----|-----|-----|-----|----|----|
| number of gridpoints: |     |     |     |     |     |    |    |
| atom                  | H16 | H17 | H18 | H19 | H20 | C1 | H5 |

H6

|          |    |    |    |    |    |    |    |
|----------|----|----|----|----|----|----|----|
| grid # 1 | 72 | 73 | 73 | 73 | 73 | 82 | 70 |
|----------|----|----|----|----|----|----|----|

69

|          |     |     |     |     |     |    |     |
|----------|-----|-----|-----|-----|-----|----|-----|
| grid # 2 | 114 | 115 | 118 | 118 | 118 | 88 | 110 |
|----------|-----|-----|-----|-----|-----|----|-----|

104

|          |     |     |     |     |     |     |     |
|----------|-----|-----|-----|-----|-----|-----|-----|
| grid # 3 | 214 | 216 | 223 | 222 | 224 | 164 | 217 |
|----------|-----|-----|-----|-----|-----|-----|-----|

207

|          |     |     |     |     |     |     |     |
|----------|-----|-----|-----|-----|-----|-----|-----|
| grid # 4 | 214 | 214 | 224 | 223 | 224 | 293 | 217 |
|----------|-----|-----|-----|-----|-----|-----|-----|

205

|                       |    |     |     |     |     |    |    |
|-----------------------|----|-----|-----|-----|-----|----|----|
| number of gridpoints: |    |     |     |     |     |    |    |
| atom                  | C3 | C26 | C27 | C28 | C29 | H1 | H2 |

H3

|          |    |    |    |    |    |    |    |
|----------|----|----|----|----|----|----|----|
| grid # 1 | 89 | 88 | 88 | 89 | 89 | 72 | 71 |
|----------|----|----|----|----|----|----|----|

73

|          |    |    |    |    |    |     |     |
|----------|----|----|----|----|----|-----|-----|
| grid # 2 | 97 | 95 | 96 | 97 | 97 | 115 | 114 |
|----------|----|----|----|----|----|-----|-----|

118

|          |     |     |     |     |     |     |     |
|----------|-----|-----|-----|-----|-----|-----|-----|
| grid # 3 | 185 | 182 | 184 | 184 | 185 | 217 | 213 |
|----------|-----|-----|-----|-----|-----|-----|-----|

223

|          |     |     |     |     |     |     |     |
|----------|-----|-----|-----|-----|-----|-----|-----|
| grid # 4 | 328 | 328 | 329 | 328 | 328 | 217 | 212 |
|----------|-----|-----|-----|-----|-----|-----|-----|

224

|                       |    |     |     |       |
|-----------------------|----|-----|-----|-------|
| number of gridpoints: |    |     |     |       |
| atom                  | H9 | H10 | H25 | total |

|          |     |     |     |       |
|----------|-----|-----|-----|-------|
| grid # 1 | 73  | 73  | 72  | 3520  |
| grid # 2 | 118 | 118 | 115 | 4493  |
| grid # 3 | 223 | 223 | 220 | 8634  |
| grid # 4 | 224 | 224 | 224 | 12246 |

end of program grid

start of program rwr  
end of program rwr

start of program scf

|      | i | u | d | i | g |                  |         | RMS     | maximum |
|------|---|---|---|---|---|------------------|---------|---------|---------|
|      | t | p | i | c | r |                  |         |         |         |
|      | e | d | i | u | i |                  | energy  | density | DIIS    |
|      | r | t | s | t | d | total energy     | change  | change  | error   |
| etot | 1 | N | N | 1 | U | -990.39066938504 |         | 2.3E-05 | 1.1E-03 |
| etot | 2 | Y | Y | 4 | M | -990.39082701468 | 1.6E-04 | 1.1E-05 | 4.2E-04 |
| etot | 3 | Y | Y | 4 | M | -990.39084593688 | 1.9E-05 | 3.2E-06 | 1.1E-04 |
| etot | 4 | Y | N | 4 | M | -990.39084898231 | 3.0E-06 | 0.0E+00 | 0.0E+00 |

Energy components, in hartrees:

|     |                               |                   |       |
|-----|-------------------------------|-------------------|-------|
| (A) | Nuclear repulsion.....        | 1971.09136691580  |       |
| (E) | Total one-electron terms..... | -5260.45116671076 |       |
| (I) | Total two-electron terms..... | 2298.96895081265  |       |
| (L) | Electronic energy.....        | -2961.48221589810 | (E+I) |
| (N) | Total energy.....             | -990.39084898231  | (A+L) |

SCFE: SCF energy: HF -990.39084898231 hartrees iterations:

4

HOMO energy: -0.26909  
LUMO energy: 0.09670

Orbital energies:

|           |           |           |           |           |           |
|-----------|-----------|-----------|-----------|-----------|-----------|
| -15.60482 | -15.56511 | -11.29607 | -11.28679 | -11.27163 | -11.25115 |
| -11.25090 | -11.24617 | -11.24561 | -11.23984 | -11.23956 | -11.23889 |
| -11.23843 | -11.23775 | -11.23701 | -11.23573 | -11.23460 | -11.23444 |
| -11.23276 | -11.23041 | -11.22479 | -11.22011 | -11.21902 | -11.21611 |
| -11.21311 | -1.32505  | -1.25012  | -1.16329  | -1.16072  | -1.13844  |
| -1.07455  | -1.06701  | -1.03926  | -1.02193  | -1.01882  | -1.01722  |
| -0.97108  | -0.95429  | -0.93372  | -0.86021  | -0.83691  | -0.83360  |
| -0.82903  | -0.80715  | -0.79555  | -0.77004  | -0.73267  | -0.71741  |
| -0.70115  | -0.69841  | -0.66628  | -0.65791  | -0.64291  | -0.63702  |
| -0.63380  | -0.62376  | -0.62069  | -0.61579  | -0.59625  | -0.59229  |
| -0.59055  | -0.58752  | -0.57825  | -0.55807  | -0.55233  | -0.54821  |
| -0.54447  | -0.51744  | -0.50724  | -0.50258  | -0.50023  | -0.49595  |
| -0.49354  | -0.49120  | -0.48746  | -0.48116  | -0.42969  | -0.40485  |
| -0.36758  | -0.34333  | -0.34129  | -0.33767  | -0.32932  | -0.28244  |
| -0.26909  | 0.09670   | 0.12895   | 0.13716   | 0.13754   | 0.14851   |
| 0.17843   | 0.20872   | 0.22830   | 0.23522   | 0.24111   |           |

end of program scf

start of program derla  
end of program derla



start of program rwr  
end of program rwr

start of program der1b

forces (hartrees/bohr) : total

| atom | label | x             | y             | z             |
|------|-------|---------------|---------------|---------------|
| ---- | ----- | -----         | -----         | -----         |
| 1    | N1    | 4.528739E-04  | -2.150721E-04 | -7.189734E-04 |
| 2    | N2    | -5.179471E-04 | -3.795031E-05 | 3.540438E-04  |
| 3    | C4    | 1.453513E-04  | -6.415916E-05 | 2.186439E-05  |
| 4    | C5    | 7.956954E-04  | -7.125645E-05 | -6.055630E-04 |
| 5    | C6    | 1.674864E-04  | -8.425208E-05 | -1.081652E-04 |
| 6    | C7    | -2.512909E-04 | 2.681225E-04  | 1.706745E-04  |
| 7    | C13   | 2.264142E-04  | 5.762714E-04  | 8.823663E-05  |
| 8    | H4    | -6.045948E-05 | -1.622022E-04 | 5.346281E-05  |
| 9    | C8    | -9.811810E-06 | -6.163186E-04 | -1.033681E-04 |
| 10   | C11   | -3.140914E-04 | -5.043245E-07 | 3.741302E-04  |
| 11   | H7    | -7.779658E-05 | 9.048357E-05  | 3.931211E-05  |
| 12   | C9    | 2.767482E-04  | 5.658957E-04  | -1.033924E-04 |
| 13   | H8    | -1.429809E-04 | -1.901601E-05 | 1.548469E-04  |
| 14   | C10   | -7.750078E-05 | 3.688975E-04  | 2.521305E-04  |
| 15   | C12   | 4.616740E-04  | 5.257927E-06  | -2.829912E-04 |
| 16   | C2    | 2.944823E-04  | 2.233180E-04  | 5.568139E-04  |
| 17   | H13   | 4.427948E-04  | 6.578201E-05  | 1.726383E-04  |
| 18   | C14   | 1.282378E-04  | -1.306465E-04 | 5.130233E-04  |
| 19   | H15   | -1.131664E-04 | -2.810631E-04 | -3.533440E-05 |
| 20   | C15   | -5.253545E-04 | 1.215568E-05  | -8.190267E-05 |
| 21   | C16   | 1.228580E-04  | -7.128547E-05 | 5.101624E-04  |
| 22   | C17   | -7.451867E-04 | -2.526086E-04 | 2.209580E-04  |
| 23   | C18   | -1.326991E-03 | -2.850276E-04 | -7.335060E-04 |
| 24   | C19   | -1.692902E-04 | 6.245857E-06  | -3.167455E-04 |
| 25   | H16   | 3.328469E-04  | 1.496603E-04  | 2.129530E-04  |
| 26   | H17   | 3.554518E-04  | 1.287242E-04  | -1.716810E-04 |
| 27   | H18   | 1.486137E-03  | 2.577115E-04  | 2.009026E-04  |
| 28   | H19   | 1.714175E-05  | 8.756748E-05  | -1.598401E-04 |
| 29   | H20   | 3.361176E-05  | 4.889786E-05  | -2.258726E-04 |
| 30   | C1    | -2.352300E-04 | 1.325569E-04  | 1.607766E-04  |
| 31   | H5    | -2.663504E-05 | 8.592286E-06  | 1.148176E-04  |
| 32   | H6    | -4.109229E-05 | 8.430998E-05  | 1.882357E-04  |
| 33   | C3    | -4.420181E-04 | -1.741977E-04 | -2.983395E-04 |
| 34   | C26   | -2.316693E-04 | -2.309980E-04 | -1.002232E-04 |
| 35   | C27   | -8.113392E-05 | -3.491728E-05 | -1.261326E-04 |
| 36   | C28   | 2.378795E-04  | 1.576131E-04  | 7.887497E-05  |
| 37   | C29   | 1.155601E-04  | 5.628839E-05  | 2.498595E-04  |
| 38   | H1    | -1.391838E-04 | -3.540240E-05 | 1.268414E-04  |
| 39   | H2    | 6.131107E-05  | 1.420514E-04  | 1.187152E-04  |
| 40   | H3    | 5.722184E-05  | 1.176396E-04  | -1.489399E-04 |
| 41   | H9    | -1.997639E-04 | -2.093410E-04 | -2.637846E-04 |

|       |       |               |              |               |
|-------|-------|---------------|--------------|---------------|
| 42    | H10   | 2.310080E-04  | 2.058152E-04 | -3.046466E-04 |
| 43    | H25   | -5.723237E-05 | 6.307406E-05 | -1.828532E-05 |
| ----- |       |               |              |               |
|       | total | 6.569597E-04  | 8.467135E-04 | 2.658720E-05  |

end of program derlb

start of program geopt 14

geometry optimization step 14

reading input hessian of dimension 129

in five columns format

reading input hessian of dimension 129

in five columns format

reading input hessian of dimension 129

in five columns format

Level shifts adjusted to satisfy step-size constraints

Step size: 0.0108550

Cos(theta): 0.7082419

Final level shift: -3.0472439E-02

energy change: -7.4265E-06 \* ( 5.0000E-05 )

gradient maximum: 1.4699E-03 . ( 4.5000E-04 )

gradient rms: 2.7737E-04 \* ( 3.0000E-04 )

step size: 0.01085 trust radius: 0.01000

displacement maximum: 4.5549E-03 . ( 1.8000E-03 )

displacement rms: 8.5285E-04 \* ( 1.2000E-03 )

predicted energy change: -1.5366E-05 geom step: 1.0855E-

02 full step: 1.0855E-02

molecular structure not yet converged...

center of mass moved by:

x: 2.3234E-04 y: -3.9719E-04 z: 1.1836E-04

new geometry:

|      | angstroms     |               |               |
|------|---------------|---------------|---------------|
| atom | x             | y             | z             |
| N1   | -0.2476098628 | 0.4319499494  | 1.1700896461  |
| N2   | -1.0050850757 | -2.2950871682 | 1.1949182325  |
| C4   | -1.2225555532 | -0.0359392069 | 1.9934979632  |
| C5   | -0.0345337388 | -1.9145591457 | 0.4863206158  |
| C6   | -1.6345629750 | -1.3576518558 | 2.0372932256  |
| C7   | -1.7207638142 | 0.9827487410  | 2.7857085019  |
| C13  | 0.6372167911  | -2.9214974519 | -0.4226269266 |
| H4   | -2.9991767135 | -2.6746254046 | 2.9867461727  |
| C8   | -2.7544283972 | 0.6541992122  | 3.6802520196  |
| C11  | -0.9547075557 | 2.1487129569  | 2.4185234965  |
| H7   | -3.1936858699 | 1.4000793918  | 4.3191782963  |

|     |               |               |               |
|-----|---------------|---------------|---------------|
| C9  | -3.1953417522 | -0.6499826706 | 3.7301011813  |
| H8  | -3.9846205275 | -0.9126483273 | 4.4122075724  |
| C10 | -2.6412076664 | -1.6632555907 | 2.9184523073  |
| C12 | -0.0714118196 | 1.7763193928  | 1.4539254438  |
| C2  | 0.9267126827  | 2.6085697080  | 0.7475086448  |
| H13 | 1.7145636018  | -2.8715088035 | -0.2838423517 |
| C14 | 0.3089199593  | -2.7020981095 | -1.8909152593 |
| H15 | 0.3081077662  | -3.9039526830 | -0.1083403583 |
| C15 | -0.3215924809 | -2.3201267580 | -4.5836616469 |
| C16 | 1.3004540244  | -2.3992437756 | -2.8137797881 |
| C17 | -1.0077278059 | -2.8118948597 | -2.3339058106 |
| C18 | -1.3203617236 | -2.6227459376 | -3.6680394462 |
| C19 | 0.9888784831  | -2.2093360982 | -4.1534576988 |
| H16 | 2.3240667900  | -2.3146888619 | -2.4895233992 |
| H17 | -1.7849137076 | -3.0449393883 | -1.6268919447 |
| H18 | -2.3419771432 | -2.7122708466 | -3.9947783125 |
| H19 | 1.7707403444  | -1.9764961643 | -4.8551652860 |
| H20 | -0.5656277175 | -2.1736956496 | -5.6211053749 |
| C1  | 0.5760456600  | -0.5105838268 | 0.4433549677  |
| H5  | 1.5800429573  | -0.5626136306 | 0.8641513090  |
| H6  | 0.6825437933  | -0.2189447287 | -0.5941242795 |
| C3  | 2.7951744578  | 4.2145617192  | -0.5601377830 |
| C26 | 1.8187572576  | 3.3915699332  | 1.4744469707  |
| C27 | 0.9785171969  | 2.6447421378  | -0.6446715605 |
| C28 | 1.9082206454  | 3.4396720163  | -1.2930044553 |
| C29 | 2.7448249516  | 4.1917280945  | 0.8244421729  |
| H1  | 1.7902754511  | 3.3610162274  | 2.5486052296  |
| H2  | 0.2747696491  | 2.0686681731  | -1.2192937084 |
| H3  | 1.9337718424  | 3.4605773143  | -2.3682340620 |
| H9  | 3.4301063300  | 4.7894624992  | 1.3997519889  |
| H10 | 3.5171655374  | 4.8322369654  | -1.0645143063 |
| H25 | -1.0688078963 | 3.1463685995  | 2.7914697600  |

nuclear repulsion energy..... 1971.109269844 hartrees

/ end of geometry optimization iteration 14 /

end of program geopt

start of program onee

smallest eigenvalue of S: 2.820E-04

number of canonical orbitals..... 461

end of program onee

start of program probe

end of program probe

start of program grid

| number of gridpoints: |          |     |     |     |     |     |     |     |
|-----------------------|----------|-----|-----|-----|-----|-----|-----|-----|
|                       | atom     | N1  | N2  | C4  | C5  | C6  | C7  | C13 |
| H4                    |          |     |     |     |     |     |     |     |
|                       | grid # 1 | 96  | 102 | 87  | 87  | 90  | 90  | 84  |
| 73                    |          |     |     |     |     |     |     |     |
|                       | grid # 2 | 103 | 112 | 95  | 95  | 99  | 98  | 92  |
| 118                   |          |     |     |     |     |     |     |     |
|                       | grid # 3 | 214 | 227 | 195 | 187 | 191 | 199 | 163 |
| 224                   |          |     |     |     |     |     |     |     |
|                       | grid # 4 | 389 | 414 | 322 | 320 | 323 | 347 | 299 |
| 224                   |          |     |     |     |     |     |     |     |

| number of gridpoints: |          |     |     |     |     |     |     |     |
|-----------------------|----------|-----|-----|-----|-----|-----|-----|-----|
|                       | atom     | C8  | C11 | H7  | C9  | H8  | C10 | C12 |
| C2                    |          |     |     |     |     |     |     |     |
|                       | grid # 1 | 89  | 86  | 73  | 87  | 73  | 89  | 86  |
| 92                    |          |     |     |     |     |     |     |     |
|                       | grid # 2 | 97  | 94  | 118 | 97  | 118 | 97  | 94  |
| 100                   |          |     |     |     |     |     |     |     |
|                       | grid # 3 | 184 | 185 | 223 | 184 | 222 | 184 | 194 |
| 195                   |          |     |     |     |     |     |     |     |
|                       | grid # 4 | 329 | 331 | 226 | 331 | 223 | 329 | 317 |
| 341                   |          |     |     |     |     |     |     |     |

| number of gridpoints: |          |     |     |     |     |     |     |     |
|-----------------------|----------|-----|-----|-----|-----|-----|-----|-----|
|                       | atom     | H13 | C14 | H15 | C15 | C16 | C17 | C18 |
| C19                   |          |     |     |     |     |     |     |     |
|                       | grid # 1 | 69  | 91  | 69  | 89  | 88  | 88  | 89  |
| 89                    |          |     |     |     |     |     |     |     |
|                       | grid # 2 | 110 | 100 | 110 | 97  | 96  | 96  | 97  |
| 96                    |          |     |     |     |     |     |     |     |
|                       | grid # 3 | 211 | 197 | 214 | 183 | 184 | 183 | 184 |
| 183                   |          |     |     |     |     |     |     |     |
|                       | grid # 4 | 214 | 340 | 213 | 327 | 327 | 327 | 327 |
| 327                   |          |     |     |     |     |     |     |     |

| number of gridpoints: |          |     |     |     |     |     |     |     |
|-----------------------|----------|-----|-----|-----|-----|-----|-----|-----|
|                       | atom     | H16 | H17 | H18 | H19 | H20 | C1  | H5  |
| H6                    |          |     |     |     |     |     |     |     |
|                       | grid # 1 | 72  | 73  | 73  | 73  | 73  | 82  | 70  |
| 69                    |          |     |     |     |     |     |     |     |
|                       | grid # 2 | 114 | 115 | 118 | 118 | 118 | 88  | 110 |
| 104                   |          |     |     |     |     |     |     |     |
|                       | grid # 3 | 214 | 216 | 223 | 222 | 224 | 164 | 217 |
| 207                   |          |     |     |     |     |     |     |     |
|                       | grid # 4 | 214 | 214 | 224 | 223 | 224 | 293 | 217 |
| 205                   |          |     |     |     |     |     |     |     |

| number of gridpoints: |      |    |     |     |     |     |    |    |
|-----------------------|------|----|-----|-----|-----|-----|----|----|
|                       | atom | C3 | C26 | C27 | C28 | C29 | H1 | H2 |
| H3                    |      |    |     |     |     |     |    |    |

|          |     |     |     |     |     |     |     |
|----------|-----|-----|-----|-----|-----|-----|-----|
| grid # 1 | 89  | 88  | 88  | 89  | 89  | 72  | 71  |
| 73       |     |     |     |     |     |     |     |
| grid # 2 | 97  | 95  | 96  | 97  | 97  | 115 | 114 |
| 118      |     |     |     |     |     |     |     |
| grid # 3 | 185 | 182 | 184 | 185 | 185 | 217 | 213 |
| 223      |     |     |     |     |     |     |     |
| grid # 4 | 328 | 328 | 329 | 328 | 328 | 217 | 212 |
| 224      |     |     |     |     |     |     |     |

number of gridpoints:

|          |     |     |     |       |
|----------|-----|-----|-----|-------|
| atom     | H9  | H10 | H25 | total |
| grid # 1 | 73  | 73  | 72  | 3518  |
| grid # 2 | 118 | 118 | 115 | 4494  |
| grid # 3 | 223 | 224 | 220 | 8638  |
| grid # 4 | 224 | 224 | 224 | 12247 |

end of program grid

start of program rwr

end of program rwr

start of program scf

|      | i | u | d | i | g |                  |          | RMS     | maximum |
|------|---|---|---|---|---|------------------|----------|---------|---------|
|      | t | p | i | c | r |                  |          | density | DIIS    |
|      | e | d | i | u | i |                  | energy   | change  | error   |
|      | r | t | s | t | d | total energy     | change   |         |         |
| etot | 1 | N | N | 1 | U | -990.39080246980 |          | 1.4E-05 | 9.2E-04 |
| etot | 2 | Y | Y | 4 | M | -990.39085334491 | 5.1E-05  | 6.4E-06 | 3.6E-04 |
| etot | 3 | Y | Y | 4 | M | -990.39085990967 | 6.6E-06  | 2.0E-06 | 9.6E-05 |
| etot | 4 | Y | N | 4 | M | -990.39085924579 | -6.6E-07 | 0.0E+00 | 0.0E+00 |

Energy components, in hartrees:

|     |                               |                   |       |
|-----|-------------------------------|-------------------|-------|
| (A) | Nuclear repulsion.....        | 1971.10926984366  |       |
| (E) | Total one-electron terms..... | -5260.48968808571 |       |
| (I) | Total two-electron terms..... | 2298.98955899626  |       |
| (L) | Electronic energy.....        | -2961.50012908945 | (E+I) |
| (N) | Total energy.....             | -990.39085924579  | (A+L) |

SCFE: SCF energy: HF -990.39085924579 hartrees iterations:  
4

HOMO energy: -0.26901  
LUMO energy: 0.09668

Orbital energies:

|           |           |           |           |           |           |
|-----------|-----------|-----------|-----------|-----------|-----------|
| -15.60463 | -15.56524 | -11.29626 | -11.28681 | -11.27141 | -11.25098 |
|-----------|-----------|-----------|-----------|-----------|-----------|

|           |           |           |           |           |           |
|-----------|-----------|-----------|-----------|-----------|-----------|
| -11.25089 | -11.24604 | -11.24583 | -11.23989 | -11.23981 | -11.23902 |
| -11.23846 | -11.23783 | -11.23708 | -11.23595 | -11.23451 | -11.23447 |
| -11.23271 | -11.23045 | -11.22455 | -11.22026 | -11.21879 | -11.21610 |
| -11.21302 | -1.32494  | -1.24990  | -1.16327  | -1.16057  | -1.13849  |
| -1.07446  | -1.06705  | -1.03929  | -1.02190  | -1.01890  | -1.01702  |
| -0.97103  | -0.95434  | -0.93367  | -0.86016  | -0.83696  | -0.83361  |
| -0.82905  | -0.80707  | -0.79550  | -0.76999  | -0.73262  | -0.71741  |
| -0.70112  | -0.69838  | -0.66629  | -0.65789  | -0.64288  | -0.63712  |
| -0.63384  | -0.62367  | -0.62072  | -0.61582  | -0.59621  | -0.59233  |
| -0.59050  | -0.58743  | -0.57834  | -0.55809  | -0.55227  | -0.54820  |
| -0.54435  | -0.51743  | -0.50724  | -0.50258  | -0.50021  | -0.49593  |
| -0.49348  | -0.49117  | -0.48739  | -0.48119  | -0.42972  | -0.40488  |
| -0.36749  | -0.34336  | -0.34123  | -0.33760  | -0.32929  | -0.28245  |
| -0.26901  | 0.09668   | 0.12894   | 0.13711   | 0.13740   | 0.14856   |
| 0.17846   | 0.20869   | 0.22827   | 0.23519   | 0.24116   |           |

end of program scf

start of program derla  
end of program derla

start of program rwr  
end of program rwr

start of program derlb

forces (hartrees/bohr) : total

| atom | label | x             | y             | z             |
|------|-------|---------------|---------------|---------------|
| 1    | N1    | 3.594168E-04  | -3.247900E-04 | -4.707368E-04 |
| 2    | N2    | 1.456478E-04  | 1.299541E-04  | -1.590589E-04 |
| 3    | C4    | 1.259234E-04  | -1.305667E-04 | -7.187211E-05 |
| 4    | C5    | -3.678037E-05 | -4.521296E-05 | 1.199478E-04  |
| 5    | C6    | 5.984738E-05  | -1.658855E-04 | -5.162803E-05 |
| 6    | C7    | -6.725914E-05 | 2.139092E-04  | 6.314595E-05  |
| 7    | C13   | -3.445068E-05 | 1.086910E-04  | 1.095968E-04  |
| 8    | H4    | 1.233470E-05  | -3.123613E-05 | 3.656539E-05  |
| 9    | C8    | -2.053567E-05 | 3.892458E-05  | 6.619510E-05  |
| 10   | C11   | -3.836909E-05 | 2.069748E-04  | 1.279422E-04  |
| 11   | H7    | -2.571961E-06 | 9.001533E-05  | 2.737180E-05  |
| 12   | C9    | 4.406467E-05  | -4.942249E-05 | -3.711664E-05 |
| 13   | H8    | -1.489958E-05 | 3.325105E-06  | 5.832352E-05  |
| 14   | C10   | -2.354330E-05 | 2.627673E-05  | 4.444407E-05  |
| 15   | C12   | 1.173535E-04  | 8.037980E-05  | -1.135315E-05 |
| 16   | C2    | 3.023010E-05  | 1.143481E-04  | 1.144053E-04  |
| 17   | H13   | 4.746262E-05  | 8.375568E-05  | 4.709878E-06  |
| 18   | C14   | -2.570906E-04 | -7.682341E-05 | 2.962546E-05  |
| 19   | H15   | 4.472624E-05  | -6.375860E-05 | -2.023663E-05 |

|       |       |               |               |               |
|-------|-------|---------------|---------------|---------------|
| 20    | C15   | 1.891440E-04  | 6.801696E-05  | -1.397037E-04 |
| 21    | C16   | 8.780006E-05  | 7.855990E-05  | -3.361955E-05 |
| 22    | C17   | 7.344717E-05  | -2.688328E-05 | 3.500123E-04  |
| 23    | C18   | -2.375303E-04 | -1.002662E-04 | -2.346247E-05 |
| 24    | C19   | 3.475516E-05  | 4.269829E-05  | -7.942340E-05 |
| 25    | H16   | -1.546063E-05 | -3.301204E-05 | -2.106096E-05 |
| 26    | H17   | 6.240769E-05  | 4.272218E-05  | 5.193411E-05  |
| 27    | H18   | 2.079249E-04  | 6.398798E-05  | 5.979060E-05  |
| 28    | H19   | -1.512320E-05 | -2.486948E-05 | -5.670209E-05 |
| 29    | H20   | 3.073742E-05  | 1.633282E-05  | -8.591535E-05 |
| 30    | C1    | -1.156034E-04 | 1.492051E-04  | 1.091582E-04  |
| 31    | H5    | -1.311443E-04 | 5.783864E-05  | 4.118251E-05  |
| 32    | H6    | 4.583649E-05  | 3.741885E-05  | 1.991567E-04  |
| 33    | C3    | -1.431507E-04 | -3.099268E-05 | -1.181485E-04 |
| 34    | C26   | 4.632667E-05  | 6.386637E-05  | -1.655493E-04 |
| 35    | C27   | 1.736270E-05  | 4.420336E-05  | -2.361738E-04 |
| 36    | C28   | 3.924001E-05  | 3.200689E-05  | 1.369748E-04  |
| 37    | C29   | 1.549265E-05  | 1.514235E-05  | 4.802569E-05  |
| 38    | H1    | -3.310335E-05 | 2.030411E-05  | 1.784773E-04  |
| 39    | H2    | 9.751055E-05  | 8.306954E-05  | 8.534773E-05  |
| 40    | H3    | 2.527376E-05  | 2.668486E-05  | -9.347572E-05 |
| 41    | H9    | -9.749903E-05 | -4.736787E-05 | -9.930280E-05 |
| 42    | H10   | -2.819321E-06 | 2.249804E-05  | -7.816079E-05 |
| 43    | H25   | -1.728472E-05 | 5.798267E-05  | 1.449746E-05  |
| ----- |       |               |               |               |
|       | total | 6.560473E-04  | 8.680061E-04  | 2.412989E-05  |

end of program derlb

start of program geopt 15

geometry optimization step 15

reading input hessian of dimension 129  
in five columns format  
reading input hessian of dimension 129  
in five columns format

Level shifts adjusted to satisfy step-size constraints

Step size: 0.0143612

Cos(theta): 0.4919231

Final level shift: -2.7000810E-02

energy change: -1.0263E-05 \* ( 5.0000E-05 )  
gradient maximum: 4.0569E-04 \* ( 4.5000E-04 )  
gradient rms: 1.0457E-04 \* ( 3.0000E-04 )  
step size: 0.01436 trust radius: 0.01414  
displacement maximum: 8.4903E-03 . ( 1.8000E-03 )  
displacement rms: 1.1283E-03 \* ( 1.2000E-03 )

predicted energy change: -7.4859E-06      geom step: 1.4361E-02  
 full step: 1.4361E-02  
 molecular structure not yet converged...

center of mass moved by:  
 x: 2.6501E-05      y: -2.4923E-04      z: 6.1267E-05

new geometry:

|      | angstroms     |               |               |
|------|---------------|---------------|---------------|
| atom | x             | y             | z             |
| N1   | -0.2463607370 | 0.4314193906  | 1.1710338958  |
| N2   | -1.0035424221 | -2.2955233045 | 1.1947806590  |
| C4   | -1.2216235933 | -0.0368540479 | 1.9940347638  |
| C5   | -0.0326064789 | -1.9145180546 | 0.4866450499  |
| C6   | -1.6331040260 | -1.3588415492 | 2.0376289344  |
| C7   | -1.7214275643 | 0.9821252034  | 2.7857401080  |
| C13  | 0.6387952323  | -2.9207111820 | -0.4230303496 |
| H4   | -2.9983933254 | -2.6759482577 | 2.9865390107  |
| C8   | -2.7554322781 | 0.6531437848  | 3.6795071530  |
| C11  | -0.9556687926 | 2.1484771315  | 2.4194464699  |
| H7   | -3.1957362911 | 1.3993275357  | 4.3177668929  |
| C9   | -3.1954005477 | -0.6509580953 | 3.7294178623  |
| H8   | -3.9851392350 | -0.9139827639 | 4.4112945459  |
| C10  | -2.6402354285 | -1.6642884757 | 2.9184542048  |
| C12  | -0.0716231059 | 1.7762215315  | 1.4549835704  |
| C2   | 0.9257296648  | 2.6089482628  | 0.7484190091  |
| H13  | 1.7160363204  | -2.8699892414 | -0.2843745120 |
| C14  | 0.3092857777  | -2.7015111760 | -1.8910420198 |
| H15  | 0.3107659365  | -3.9038972276 | -0.1098048464 |
| C15  | -0.3210182211 | -2.3198001555 | -4.5845563047 |
| C16  | 1.3026267989  | -2.4078132613 | -2.8158087619 |
| C17  | -1.0093417649 | -2.8017601438 | -2.3324540938 |
| C18  | -1.3215507168 | -2.6128445964 | -3.6669555125 |
| C19  | 0.9912426335  | -2.2182211833 | -4.1556558124 |
| H16  | 2.3277109198  | -2.3309831513 | -2.4925549566 |
| H17  | -1.7872243266 | -3.0262248434 | -1.6238607485 |
| H18  | -2.3426567575 | -2.6932803270 | -3.9926346211 |
| H19  | 1.7741739528  | -1.9932912445 | -4.8591528825 |
| H20  | -0.5645529054 | -2.1734405864 | -5.6223463359 |
| C1   | 0.5782555737  | -0.5107568800 | 0.4460053859  |
| H5   | 1.5811573473  | -0.5631828239 | 0.8704649311  |
| H6   | 0.6880840404  | -0.2177615274 | -0.5909622482 |
| C3   | 2.7922215595  | 4.2150771119  | -0.5617697159 |
| C26  | 1.8178585798  | 3.3922403513  | 1.4746958238  |
| C27  | 0.9762379671  | 2.6449102789  | -0.6443115909 |
| C28  | 1.9050145102  | 3.4399273512  | -1.2938231691 |
| C29  | 2.7430458157  | 4.1923393067  | 0.8232302794  |
| H1   | 1.7893807507  | 3.3619023049  | 2.5491513072  |
| H2   | 0.2718921784  | 2.0685313456  | -1.2175644237 |
| H3   | 1.9300026211  | 3.4609305987  | -2.3692287604 |
| H9   | 3.4287854490  | 4.7902046058  | 1.3973483110  |
| H10  | 3.5140165769  | 4.8329081285  | -1.0672737690 |



H25            -1.0711083010            3.1462171349            2.7921150838

nuclear repulsion energy..... 1971.034696625 hartrees

-----  
/ end of geometry optimization iteration 15 /  
-----

end of program geopt

start of program onee

smallest eigenvalue of S: 2.821E-04

number of canonical orbitals..... 461

end of program onee

start of program probe

end of program probe

start of program grid

number of gridpoints:

|     | atom     | N1  | N2  | C4  | C5  | C6  | C7  | C13 |
|-----|----------|-----|-----|-----|-----|-----|-----|-----|
| H4  |          |     |     |     |     |     |     |     |
|     | grid # 1 | 96  | 102 | 87  | 87  | 90  | 89  | 84  |
| 73  |          |     |     |     |     |     |     |     |
|     | grid # 2 | 103 | 112 | 95  | 95  | 99  | 98  | 92  |
| 118 |          |     |     |     |     |     |     |     |
|     | grid # 3 | 214 | 227 | 195 | 187 | 191 | 199 | 163 |
| 224 |          |     |     |     |     |     |     |     |
|     | grid # 4 | 388 | 414 | 321 | 320 | 322 | 348 | 299 |
| 224 |          |     |     |     |     |     |     |     |

number of gridpoints:

|     | atom     | C8  | C11 | H7  | C9  | H8  | C10 | C12 |
|-----|----------|-----|-----|-----|-----|-----|-----|-----|
| C2  |          |     |     |     |     |     |     |     |
|     | grid # 1 | 89  | 86  | 73  | 87  | 73  | 89  | 86  |
| 92  |          |     |     |     |     |     |     |     |
|     | grid # 2 | 97  | 94  | 118 | 97  | 118 | 97  | 94  |
| 100 |          |     |     |     |     |     |     |     |
|     | grid # 3 | 184 | 185 | 223 | 184 | 222 | 184 | 194 |
| 195 |          |     |     |     |     |     |     |     |
|     | grid # 4 | 328 | 331 | 226 | 331 | 223 | 329 | 317 |
| 343 |          |     |     |     |     |     |     |     |

number of gridpoints:

|     | atom     | H13 | C14 | H15 | C15 | C16 | C17 | C18 |
|-----|----------|-----|-----|-----|-----|-----|-----|-----|
| C19 |          |     |     |     |     |     |     |     |
|     | grid # 1 | 69  | 91  | 69  | 89  | 88  | 88  | 89  |
| 89  |          |     |     |     |     |     |     |     |

|          |     |     |     |    |    |    |    |
|----------|-----|-----|-----|----|----|----|----|
| grid # 2 | 109 | 100 | 110 | 97 | 96 | 96 | 97 |
|----------|-----|-----|-----|----|----|----|----|

96

|          |     |     |     |     |     |     |     |
|----------|-----|-----|-----|-----|-----|-----|-----|
| grid # 3 | 210 | 196 | 214 | 183 | 184 | 183 | 184 |
|----------|-----|-----|-----|-----|-----|-----|-----|

183

|          |     |     |     |     |     |     |     |
|----------|-----|-----|-----|-----|-----|-----|-----|
| grid # 4 | 214 | 340 | 213 | 327 | 327 | 327 | 327 |
|----------|-----|-----|-----|-----|-----|-----|-----|

327

number of gridpoints:

|      |     |     |     |     |     |    |    |
|------|-----|-----|-----|-----|-----|----|----|
| atom | H16 | H17 | H18 | H19 | H20 | C1 | H5 |
|------|-----|-----|-----|-----|-----|----|----|

H6

|          |    |    |    |    |    |    |    |
|----------|----|----|----|----|----|----|----|
| grid # 1 | 72 | 73 | 73 | 73 | 73 | 82 | 70 |
|----------|----|----|----|----|----|----|----|

69

|          |     |     |     |     |     |    |     |
|----------|-----|-----|-----|-----|-----|----|-----|
| grid # 2 | 114 | 115 | 118 | 118 | 118 | 88 | 109 |
|----------|-----|-----|-----|-----|-----|----|-----|

104

|          |     |     |     |     |     |     |     |
|----------|-----|-----|-----|-----|-----|-----|-----|
| grid # 3 | 214 | 216 | 222 | 222 | 224 | 164 | 217 |
|----------|-----|-----|-----|-----|-----|-----|-----|

207

|          |     |     |     |     |     |     |     |
|----------|-----|-----|-----|-----|-----|-----|-----|
| grid # 4 | 214 | 214 | 224 | 223 | 224 | 293 | 219 |
|----------|-----|-----|-----|-----|-----|-----|-----|

205

number of gridpoints:

|      |    |     |     |     |     |    |    |
|------|----|-----|-----|-----|-----|----|----|
| atom | C3 | C26 | C27 | C28 | C29 | H1 | H2 |
|------|----|-----|-----|-----|-----|----|----|

H3

|          |    |    |    |    |    |    |    |
|----------|----|----|----|----|----|----|----|
| grid # 1 | 89 | 88 | 88 | 89 | 89 | 72 | 71 |
|----------|----|----|----|----|----|----|----|

73

|          |    |    |    |    |    |     |     |
|----------|----|----|----|----|----|-----|-----|
| grid # 2 | 97 | 95 | 96 | 97 | 97 | 115 | 114 |
|----------|----|----|----|----|----|-----|-----|

118

|          |     |     |     |     |     |     |     |
|----------|-----|-----|-----|-----|-----|-----|-----|
| grid # 3 | 185 | 182 | 183 | 185 | 185 | 217 | 213 |
|----------|-----|-----|-----|-----|-----|-----|-----|

223

|          |     |     |     |     |     |     |     |
|----------|-----|-----|-----|-----|-----|-----|-----|
| grid # 4 | 328 | 327 | 329 | 327 | 328 | 217 | 212 |
|----------|-----|-----|-----|-----|-----|-----|-----|

224

number of gridpoints:

|      |    |     |     |       |
|------|----|-----|-----|-------|
| atom | H9 | H10 | H25 | total |
|------|----|-----|-----|-------|

|          |     |     |     |       |
|----------|-----|-----|-----|-------|
| grid # 1 | 73  | 73  | 72  | 3517  |
| grid # 2 | 118 | 118 | 115 | 4492  |
| grid # 3 | 222 | 224 | 220 | 8633  |
| grid # 4 | 224 | 224 | 224 | 12246 |

end of program grid

start of program rwr  
end of program rwr

start of program scf

|   |   |   |   |   |              |               |                                          |
|---|---|---|---|---|--------------|---------------|------------------------------------------|
| i | u | d | i | g |              |               |                                          |
| t | p | i | c | r |              |               |                                          |
| e | d | i | u | i |              |               |                                          |
| r | t | s | t | d | total energy | energy change | RMS density change<br>maximum DIIS error |

|      |   |   |   |   |   |                  |         |         |         |
|------|---|---|---|---|---|------------------|---------|---------|---------|
| etot | 1 | N | N | 1 | U | -990.39072743546 |         | 2.7E-05 | 1.6E-03 |
| etot | 2 | Y | Y | 4 | M | -990.39084046479 | 1.1E-04 | 1.0E-05 | 6.3E-04 |
| etot | 3 | Y | Y | 4 | M | -990.39085660547 | 1.6E-05 | 2.9E-06 | 1.5E-04 |
| etot | 4 | Y | N | 4 | M | -990.39085842189 | 1.8E-06 | 0.0E+00 | 0.0E+00 |

Energy components, in hartrees:

|     |                               |                   |       |
|-----|-------------------------------|-------------------|-------|
| (A) | Nuclear repulsion.....        | 1971.03469662474  |       |
| (E) | Total one-electron terms..... | -5260.33898399291 |       |
| (I) | Total two-electron terms..... | 2298.91342894628  |       |
| (L) | Electronic energy.....        | -2961.42555504663 | (E+I) |
| (N) | Total energy.....             | -990.39085842189  | (A+L) |

SCFE: SCF energy: HF -990.39085842189 hartrees iterations:  
4

HOMO energy: -0.26904  
LUMO energy: 0.09663

Orbital energies:

|           |           |           |           |           |           |
|-----------|-----------|-----------|-----------|-----------|-----------|
| -15.60476 | -15.56511 | -11.29628 | -11.28688 | -11.27173 | -11.25112 |
| -11.25088 | -11.24616 | -11.24601 | -11.23993 | -11.23979 | -11.23905 |
| -11.23848 | -11.23784 | -11.23711 | -11.23607 | -11.23466 | -11.23444 |
| -11.23292 | -11.23053 | -11.22458 | -11.22023 | -11.21899 | -11.21606 |
| -11.21326 | -1.32501  | -1.24984  | -1.16321  | -1.16033  | -1.13852  |
| -1.07453  | -1.06701  | -1.03926  | -1.02190  | -1.01887  | -1.01693  |
| -0.97093  | -0.95430  | -0.93367  | -0.86015  | -0.83703  | -0.83361  |
| -0.82898  | -0.80705  | -0.79545  | -0.77000  | -0.73261  | -0.71741  |
| -0.70108  | -0.69829  | -0.66635  | -0.65790  | -0.64282  | -0.63719  |
| -0.63386  | -0.62365  | -0.62070  | -0.61581  | -0.59629  | -0.59238  |
| -0.59044  | -0.58747  | -0.57825  | -0.55807  | -0.55220  | -0.54819  |
| -0.54450  | -0.51739  | -0.50722  | -0.50256  | -0.50019  | -0.49584  |
| -0.49341  | -0.49117  | -0.48733  | -0.48121  | -0.42975  | -0.40483  |
| -0.36754  | -0.34337  | -0.34122  | -0.33756  | -0.32914  | -0.28243  |
| -0.26904  | 0.09663   | 0.12889   | 0.13707   | 0.13733   | 0.14845   |
| 0.17836   | 0.20861   | 0.22838   | 0.23520   | 0.24116   |           |

end of program scf

start of program der1a  
end of program der1a

start of program rwr  
end of program rwr

start of program der1b

forces (hartrees/bohr) : total

| atom  | label | x             | y             | z             |
|-------|-------|---------------|---------------|---------------|
| 1     | N1    | -2.481303E-04 | 2.161363E-04  | 3.038174E-05  |
| 2     | N2    | 2.836382E-04  | -2.499438E-05 | -2.728610E-04 |
| 3     | C4    | -5.332666E-05 | 1.576006E-04  | 1.308833E-04  |
| 4     | C5    | -3.595149E-04 | -1.387013E-04 | 2.963041E-04  |
| 5     | C6    | 2.019594E-05  | 1.908855E-04  | 2.396059E-05  |
| 6     | C7    | 2.466402E-04  | -1.423657E-04 | -1.552636E-04 |
| 7     | C13   | -1.276988E-04 | 5.612039E-06  | 6.448695E-05  |
| 8     | H4    | 8.439654E-05  | 1.557089E-04  | 3.881350E-05  |
| 9     | C8    | 1.165608E-05  | 5.058858E-04  | 1.509718E-04  |
| 10    | C11   | 1.471085E-04  | -4.822498E-05 | -3.124871E-04 |
| 11    | H7    | 5.901722E-05  | -5.856555E-05 | -6.083047E-05 |
| 12    | C9    | -2.081620E-04 | -4.628287E-04 | 1.114154E-04  |
| 13    | H8    | 1.113241E-04  | 3.132659E-05  | -7.909427E-05 |
| 14    | C10   | -1.274255E-04 | -2.859290E-04 | 1.870702E-05  |
| 15    | C12   | -5.235787E-06 | 8.359514E-05  | 2.010785E-04  |
| 16    | C2    | 2.011226E-05  | 1.154169E-04  | -3.679946E-04 |
| 17    | H13   | 1.231949E-04  | 6.717329E-05  | -9.936772E-05 |
| 18    | C14   | -2.239323E-04 | 1.957682E-04  | -5.369846E-04 |
| 19    | H15   | 3.610993E-06  | -2.367943E-05 | 1.405502E-04  |
| 20    | C15   | 4.528455E-04  | 8.163430E-06  | 3.393146E-04  |
| 21    | C16   | -5.301138E-05 | -4.748777E-05 | 2.288187E-04  |
| 22    | C17   | 9.188483E-04  | 1.208919E-04  | 1.826117E-04  |
| 23    | C18   | 1.202191E-03  | 1.978553E-04  | 5.774334E-05  |
| 24    | C19   | -4.165740E-04 | -3.910772E-05 | -2.787547E-04 |
| 25    | H16   | -3.998587E-04 | 2.166071E-05  | -1.106724E-04 |
| 26    | H17   | -1.196398E-04 | -1.085782E-04 | 1.297513E-04  |
| 27    | H18   | -9.010150E-04 | -1.633065E-04 | -2.194062E-04 |
| 28    | H19   | -1.346353E-04 | 2.261628E-05  | 1.123854E-04  |
| 29    | H20   | 4.154382E-06  | -5.819682E-06 | 1.013341E-04  |
| 30    | C1    | 5.219134E-04  | 1.699161E-04  | -4.100770E-06 |
| 31    | H5    | -3.070221E-04 | -1.084423E-05 | -1.892583E-04 |
| 32    | H6    | 6.403176E-05  | -1.027693E-04 | 3.230711E-04  |
| 33    | C3    | 1.449365E-04  | 1.660298E-04  | 1.228439E-04  |
| 34    | C26   | -3.787139E-07 | 5.421162E-05  | -1.973404E-04 |
| 35    | C27   | 1.942710E-05  | 4.496688E-05  | 2.562209E-04  |
| 36    | C28   | -4.419795E-05 | -3.799500E-05 | 5.523642E-05  |
| 37    | C29   | -1.078932E-06 | -5.617927E-06 | -2.284443E-04 |
| 38    | H1    | 8.125850E-05  | 7.200215E-05  | -6.136742E-05 |
| 39    | H2    | 4.595660E-05  | 3.363527E-05  | -2.715897E-05 |
| 40    | H3    | -3.156831E-05 | -9.218442E-06 | 3.647842E-06  |
| 41    | H9    | 3.691536E-05  | 8.898917E-05  | 2.667129E-05  |
| 42    | H10   | -2.160082E-04 | -1.433661E-04 | 1.416099E-04  |
| 43    | H25   | 3.817919E-05  | -4.036847E-05 | -5.326570E-05 |
| total |       | 6.631381E-04  | 8.262798E-04  | 3.416091E-05  |

end of program der1b

start of program geopt 16

geometry optimization step 16

reading input hessian of dimension 129

in five columns format

reading input hessian of dimension 129

in five columns format

\*\* restarting optimization from step 15 \*\*

Level shifts adjusted to satisfy step-size constraints

Step size: 0.0104342

Cos(theta): 0.4965050

Final level shift: -2.6262214E-02

energy change: 8.2390E-07 # ( 5.0000E-05 )

gradient maximum: 4.0569E-04 \* ( 4.5000E-04 )

gradient rms: 1.0457E-04 \* ( 3.0000E-04 )

step size: 0.01043 trust radius: 0.01000

displacement maximum: 6.0223E-03 . ( 1.8000E-03 )

displacement rms: 8.1979E-04 \* ( 1.2000E-03 )

predicted energy change: -4.8790E-06 geom step: 1.0434E-

02 full step: 1.0434E-02

\*\*\*\*\*

\*\* Geometry optimization complete \*\*

\*\*\*\*\*

center of mass moved by:

x: 0.0000E+00

y: -6.8695E-16

z: 3.8858E-16

final geometry:

|      | angstroms     |               |               |
|------|---------------|---------------|---------------|
| atom | x             | y             | z             |
| N1   | -0.2476098628 | 0.4319499494  | 1.1700896461  |
| N2   | -1.0050850757 | -2.2950871682 | 1.1949182325  |
| C4   | -1.2225555532 | -0.0359392069 | 1.9934979632  |
| C5   | -0.0345337388 | -1.9145591457 | 0.4863206158  |
| C6   | -1.6345629750 | -1.3576518558 | 2.0372932256  |
| C7   | -1.7207638142 | 0.9827487410  | 2.7857085019  |
| C13  | 0.6372167911  | -2.9214974519 | -0.4226269266 |
| H4   | -2.9991767135 | -2.6746254046 | 2.9867461727  |
| C8   | -2.7544283972 | 0.6541992122  | 3.6802520196  |
| C11  | -0.9547075557 | 2.1487129569  | 2.4185234965  |
| H7   | -3.1936858699 | 1.4000793918  | 4.3191782963  |
| C9   | -3.1953417522 | -0.6499826706 | 3.7301011813  |
| H8   | -3.9846205275 | -0.9126483273 | 4.4122075724  |
| C10  | -2.6412076664 | -1.6632555907 | 2.9184523073  |
| C12  | -0.0714118196 | 1.7763193928  | 1.4539254438  |
| C2   | 0.9267126827  | 2.6085697080  | 0.7475086448  |
| H13  | 1.7145636018  | -2.8715088035 | -0.2838423517 |

|     |               |               |               |
|-----|---------------|---------------|---------------|
| C14 | 0.3089199593  | -2.7020981095 | -1.8909152593 |
| H15 | 0.3081077662  | -3.9039526830 | -0.1083403583 |
| C15 | -0.3215924809 | -2.3201267580 | -4.5836616469 |
| C16 | 1.3004540244  | -2.3992437756 | -2.8137797881 |
| C17 | -1.0077278059 | -2.8118948597 | -2.3339058106 |
| C18 | -1.3203617236 | -2.6227459376 | -3.6680394462 |
| C19 | 0.9888784831  | -2.2093360982 | -4.1534576988 |
| H16 | 2.3240667900  | -2.3146888619 | -2.4895233992 |
| H17 | -1.7849137076 | -3.0449393883 | -1.6268919447 |
| H18 | -2.3419771432 | -2.7122708466 | -3.9947783125 |
| H19 | 1.7707403444  | -1.9764961643 | -4.8551652860 |
| H20 | -0.5656277175 | -2.1736956496 | -5.6211053749 |
| C1  | 0.5760456600  | -0.5105838268 | 0.4433549677  |
| H5  | 1.5800429573  | -0.5626136306 | 0.8641513090  |
| H6  | 0.6825437933  | -0.2189447287 | -0.5941242795 |
| C3  | 2.7951744578  | 4.2145617192  | -0.5601377830 |
| C26 | 1.8187572576  | 3.3915699332  | 1.4744469707  |
| C27 | 0.9785171969  | 2.6447421378  | -0.6446715605 |
| C28 | 1.9082206454  | 3.4396720163  | -1.2930044553 |
| C29 | 2.7448249516  | 4.1917280945  | 0.8244421729  |
| H1  | 1.7902754511  | 3.3610162274  | 2.5486052296  |
| H2  | 0.2747696491  | 2.0686681731  | -1.2192937084 |
| H3  | 1.9337718424  | 3.4605773143  | -2.3682340620 |
| H9  | 3.4301063300  | 4.7894624992  | 1.3997519889  |
| H10 | 3.5171655374  | 4.8322369654  | -1.0645143063 |
| H25 | -1.0688078963 | 3.1463685995  | 2.7914697600  |

nuclear repulsion energy..... 1971.109269844 hartrees

/ end of geometry optimization iteration 16 /

end of program geopt

start of program post  
 Writing a SPARTAN archive file  
 end of program post

Total cpu seconds      user:      1761.812      user+sys:      1761.812

# 2-benzyl-8-chloro-5-phenyl-3H-pyrrolo[1,2,3-*de*]quinoxaline 2a

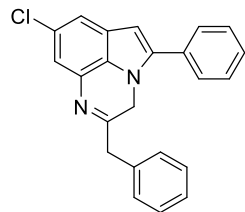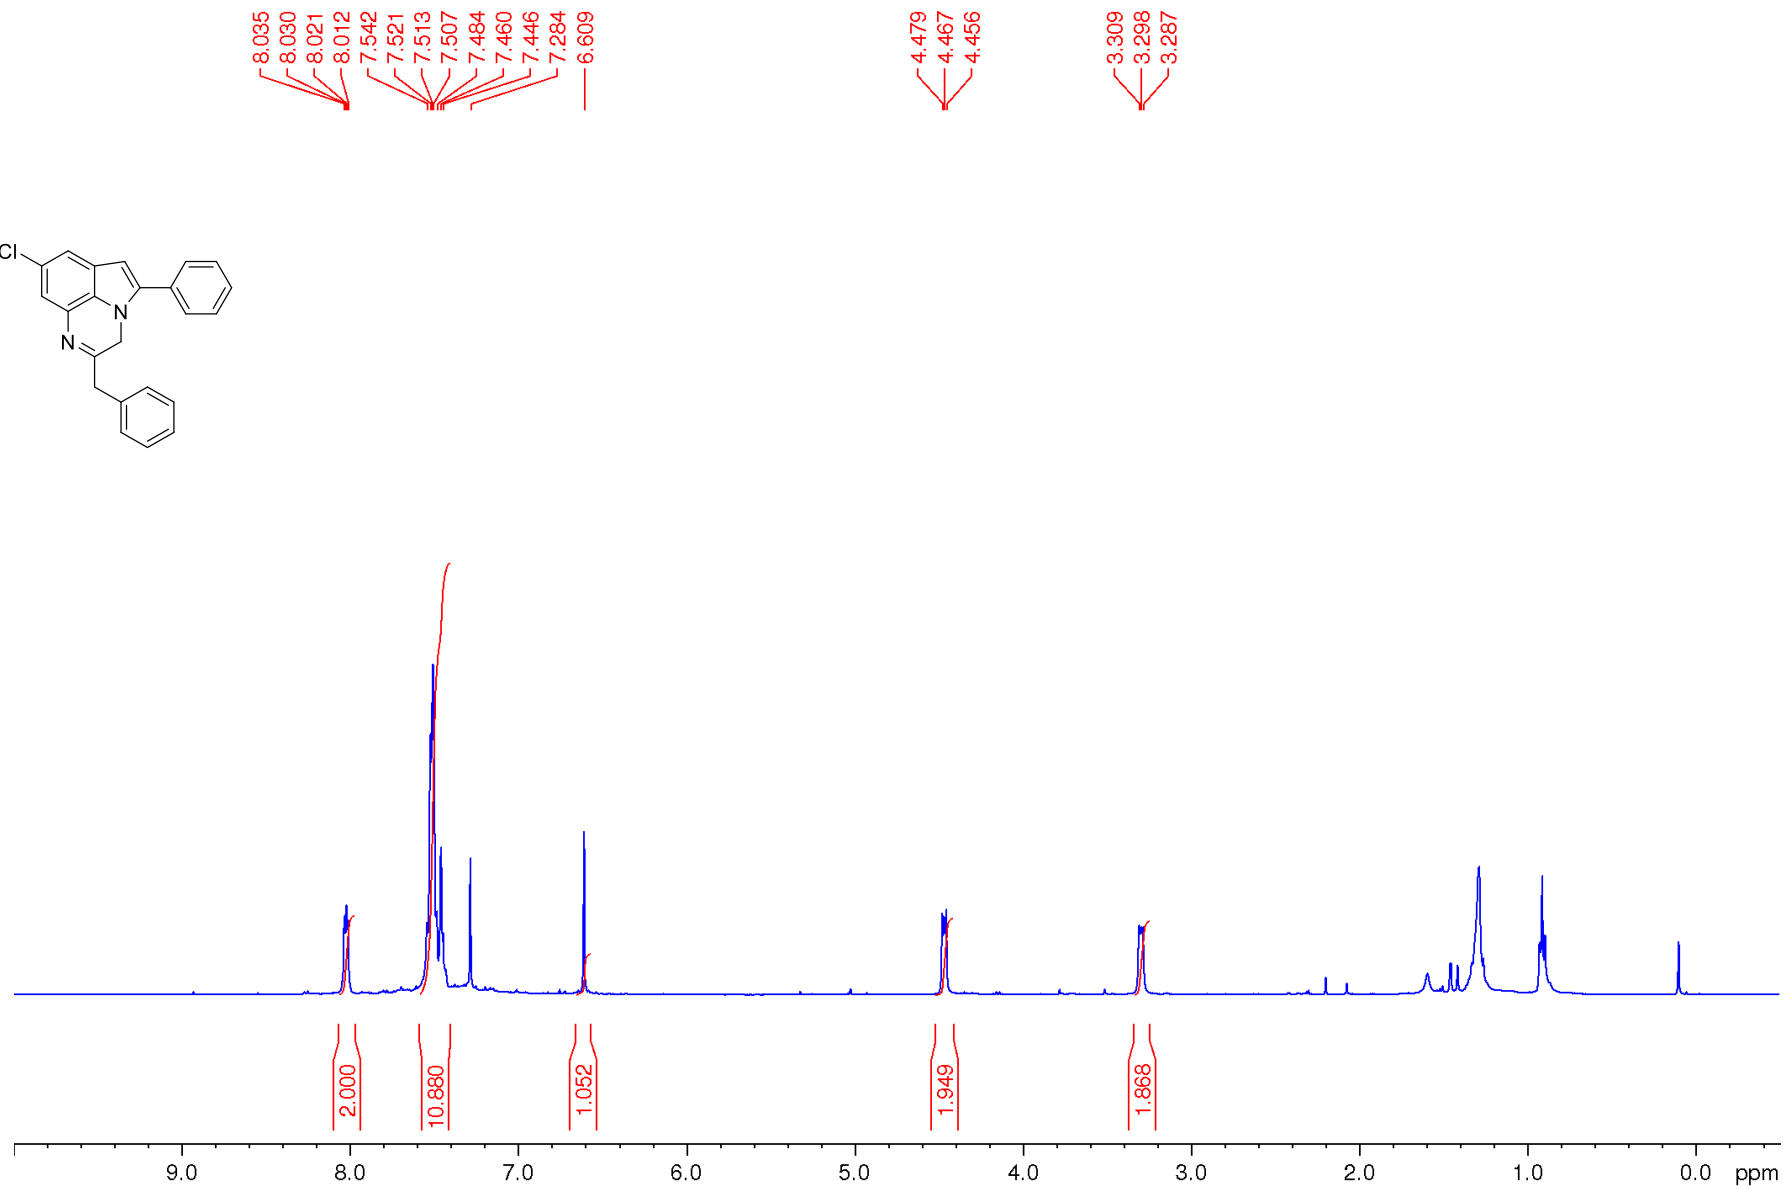

# 2-benzyl-8-chloro-5-phenyl-3H-pyrrolo[1,2,3-*de*]quinoxaline 2a

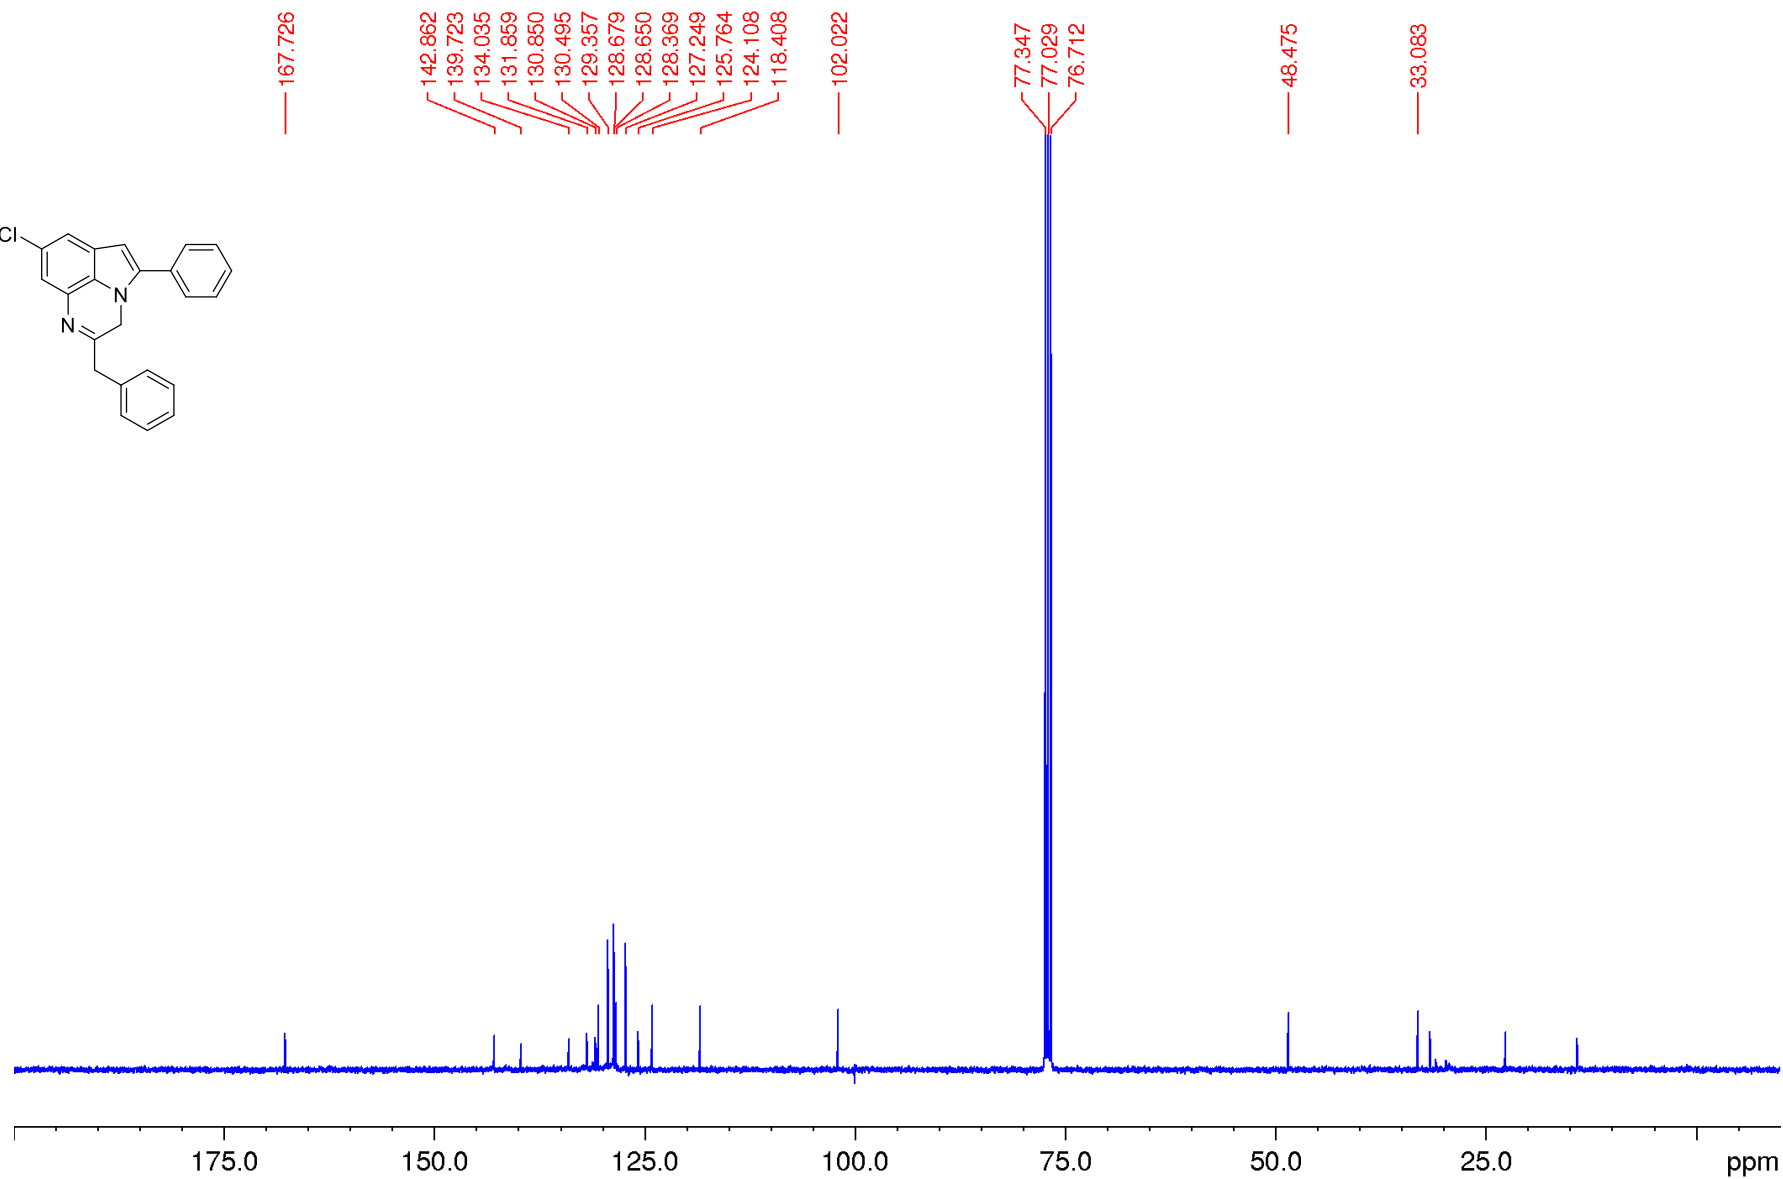



# 2-benzyl-8-chloro-5-phenyl-3H-pyrrolo[1,2,3-de]quinoxaline 2a

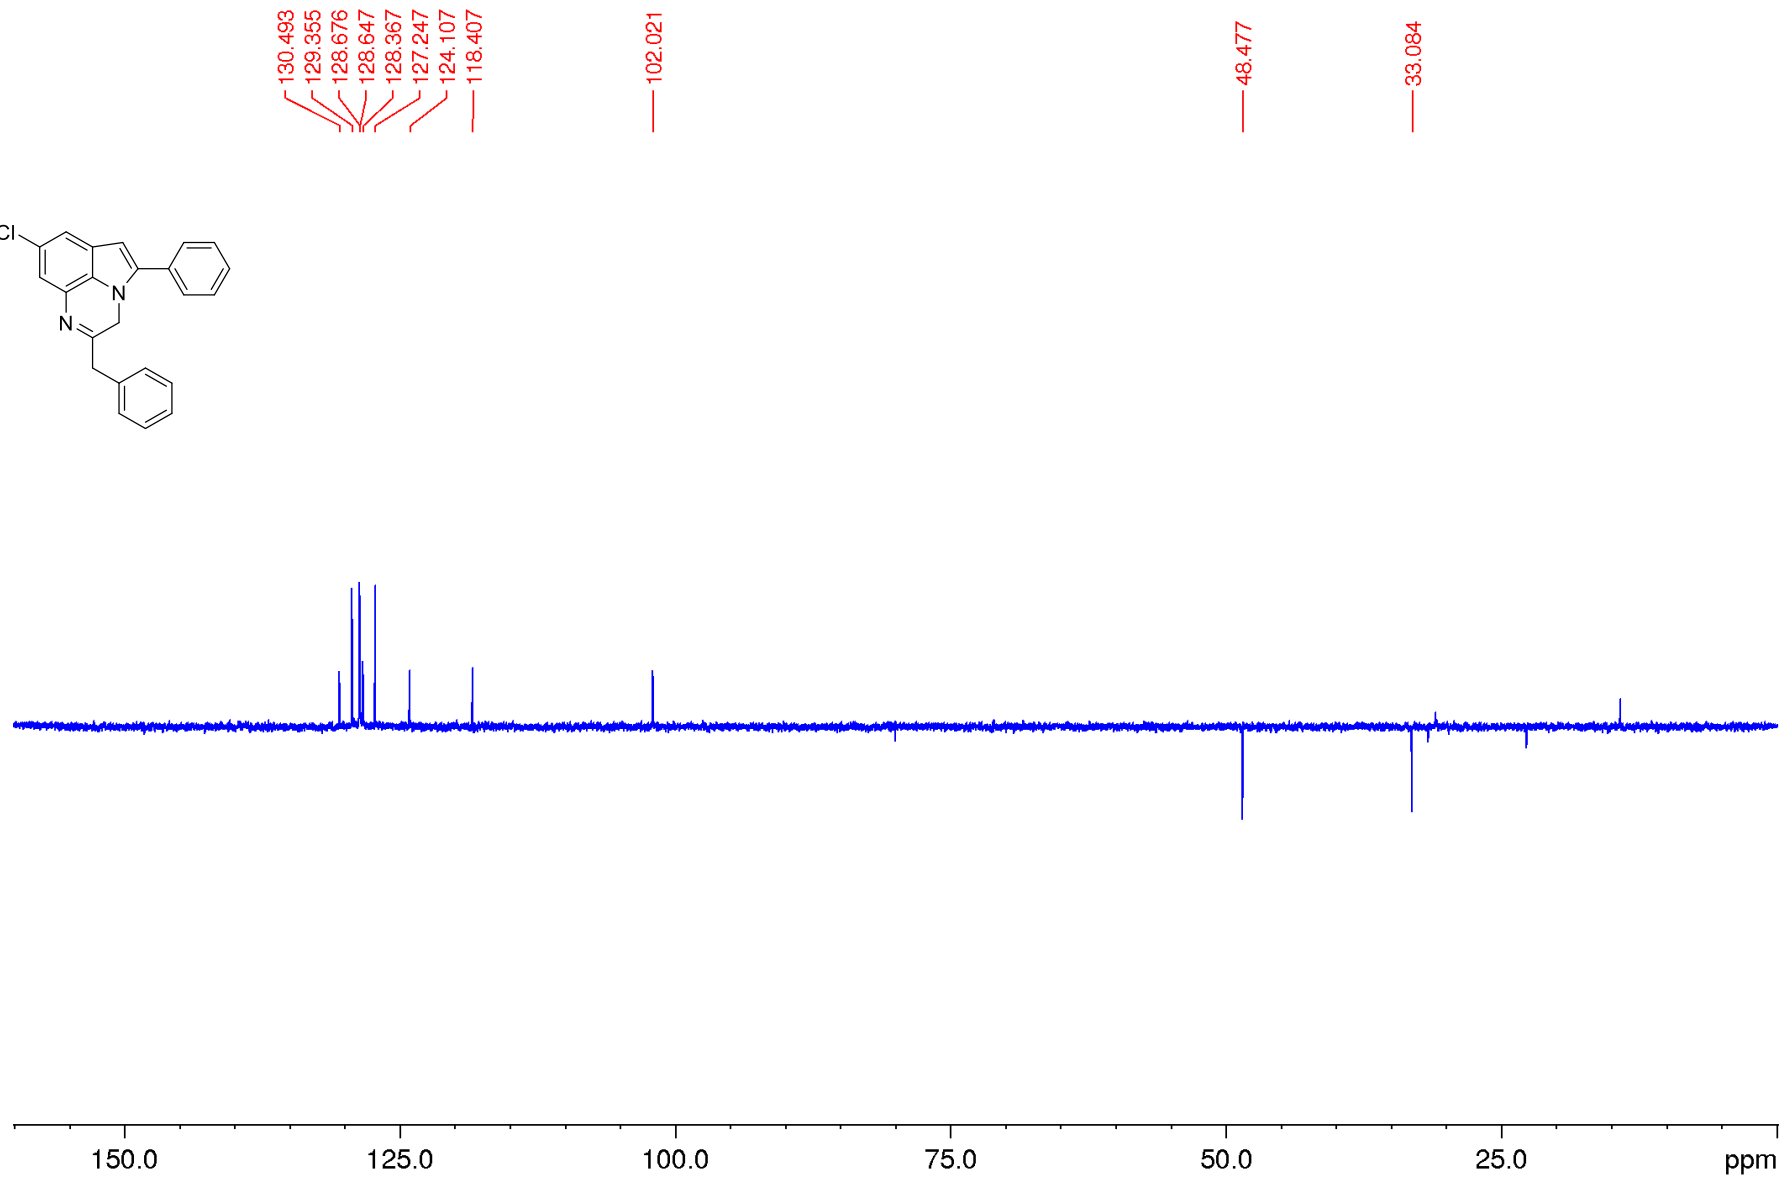

**8-chloro-2-(4-chlorobenzyl)-5-phenyl-3H-pyrrolo[1,2,3-*de*]quinoxaline 2b**

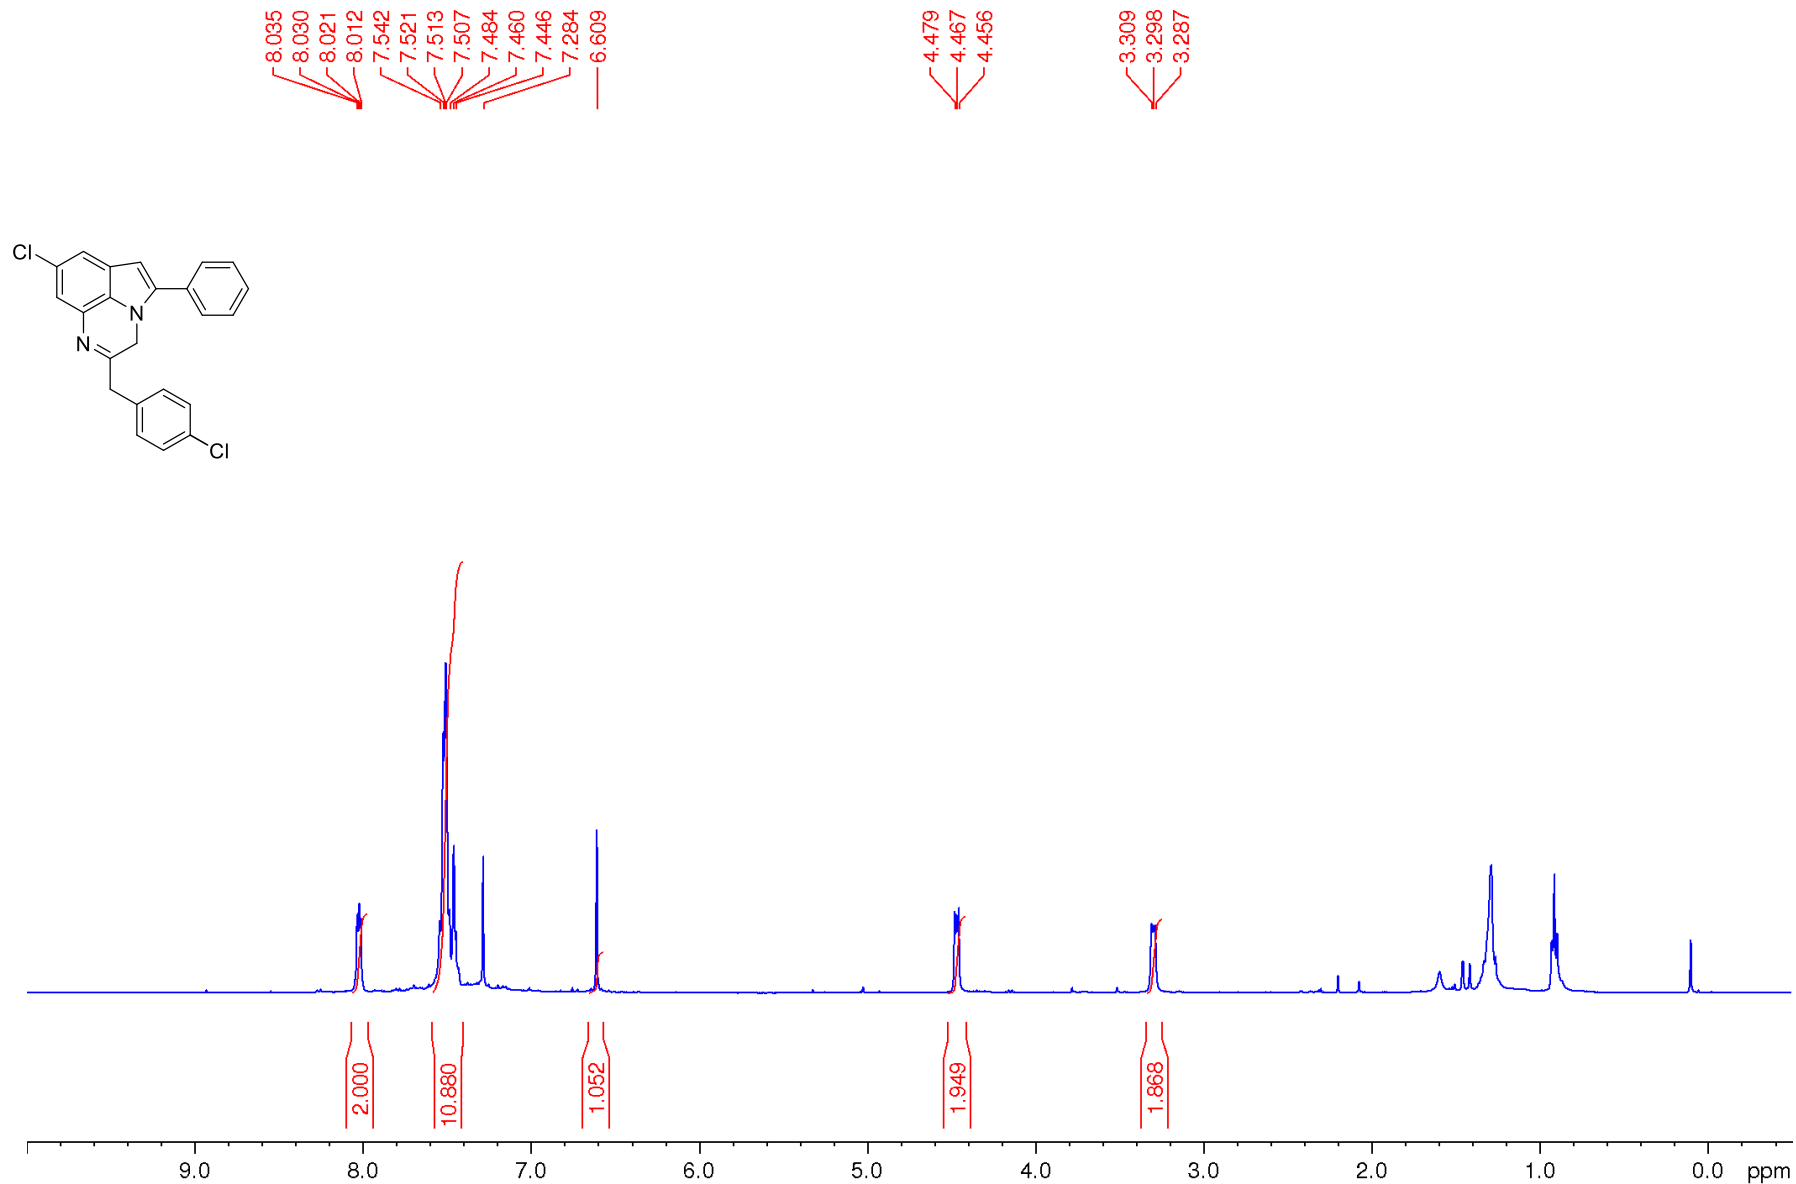

**8-chloro-2-(4-chlorobenzyl)-5-phenyl-3H-pyrrolo[1,2,3-*de*]quinoxaline 2b**

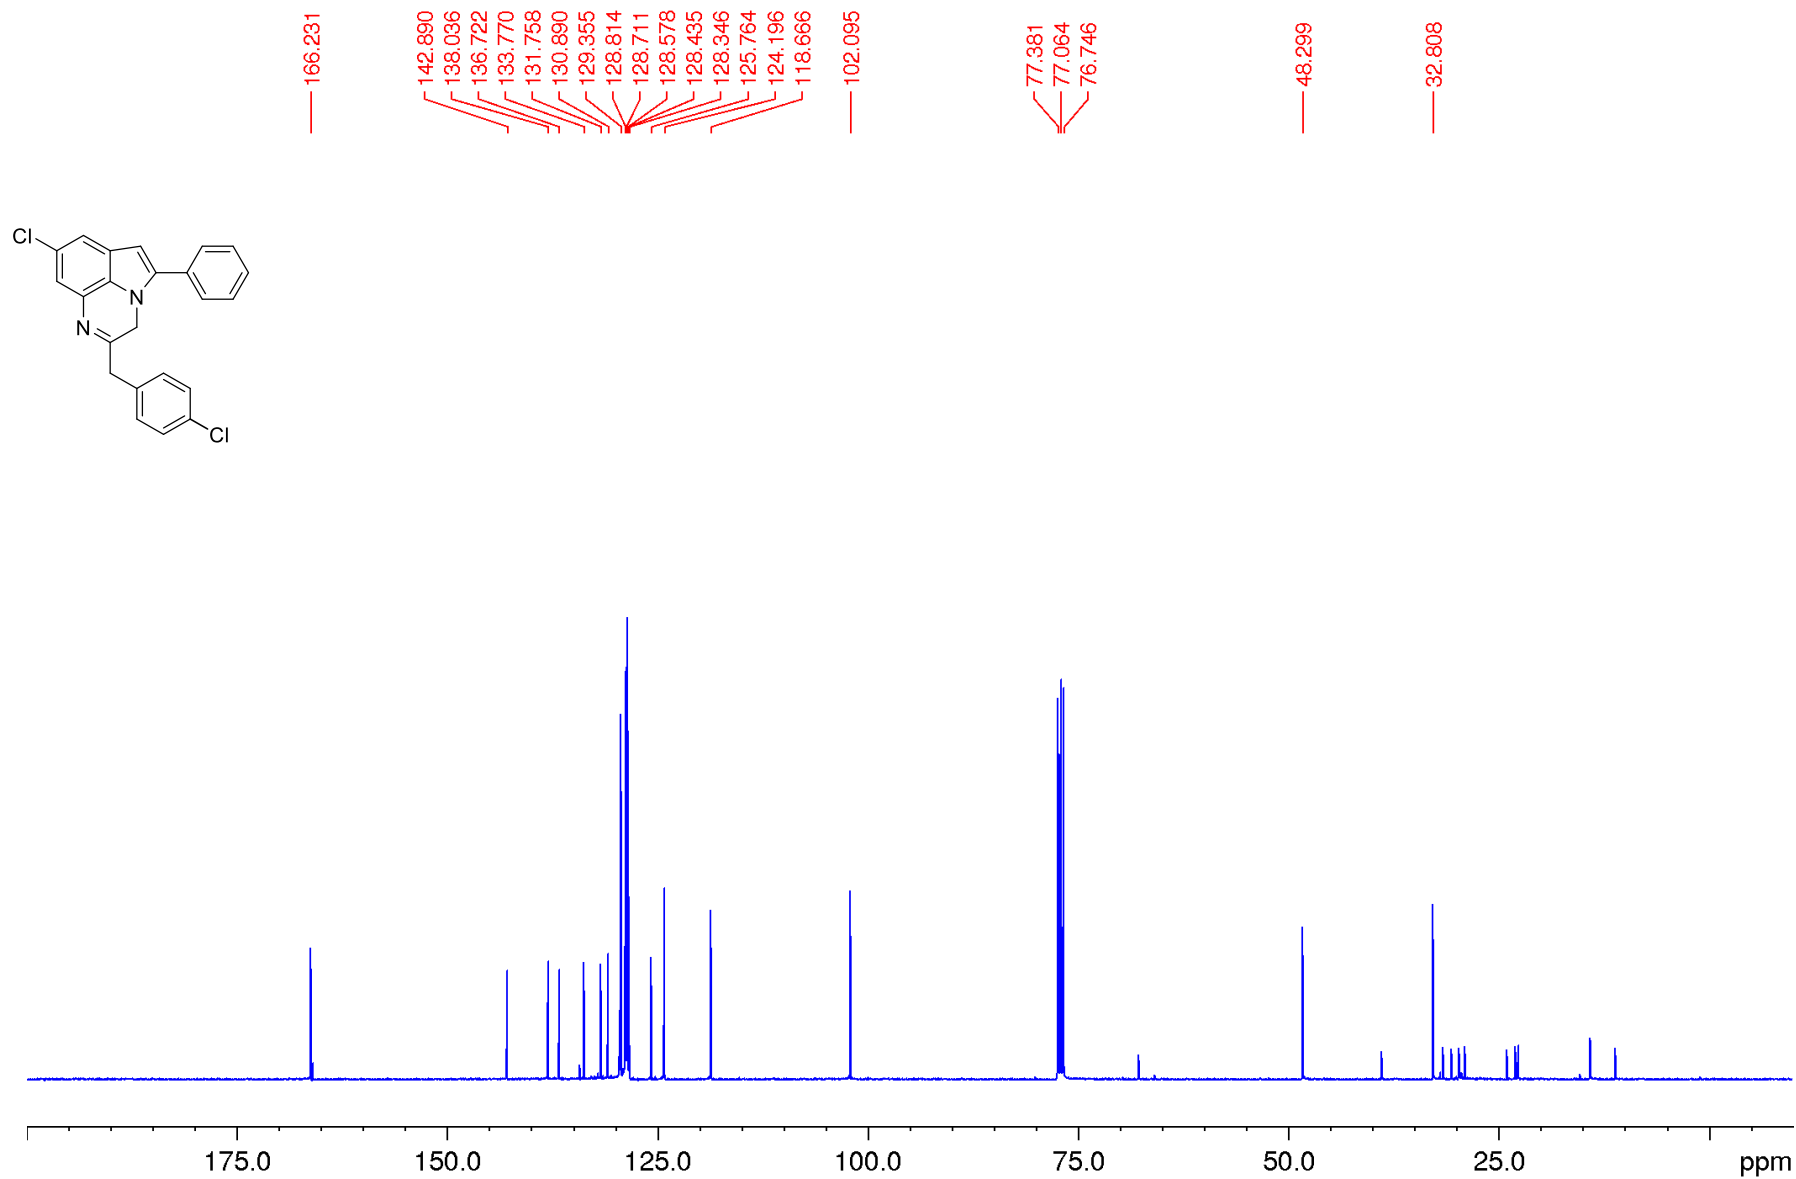

**8-chloro-2-(4-chlorobenzyl)-5-phenyl-3H-pyrrolo[1,2,3-*de*]quinoxaline 2b**

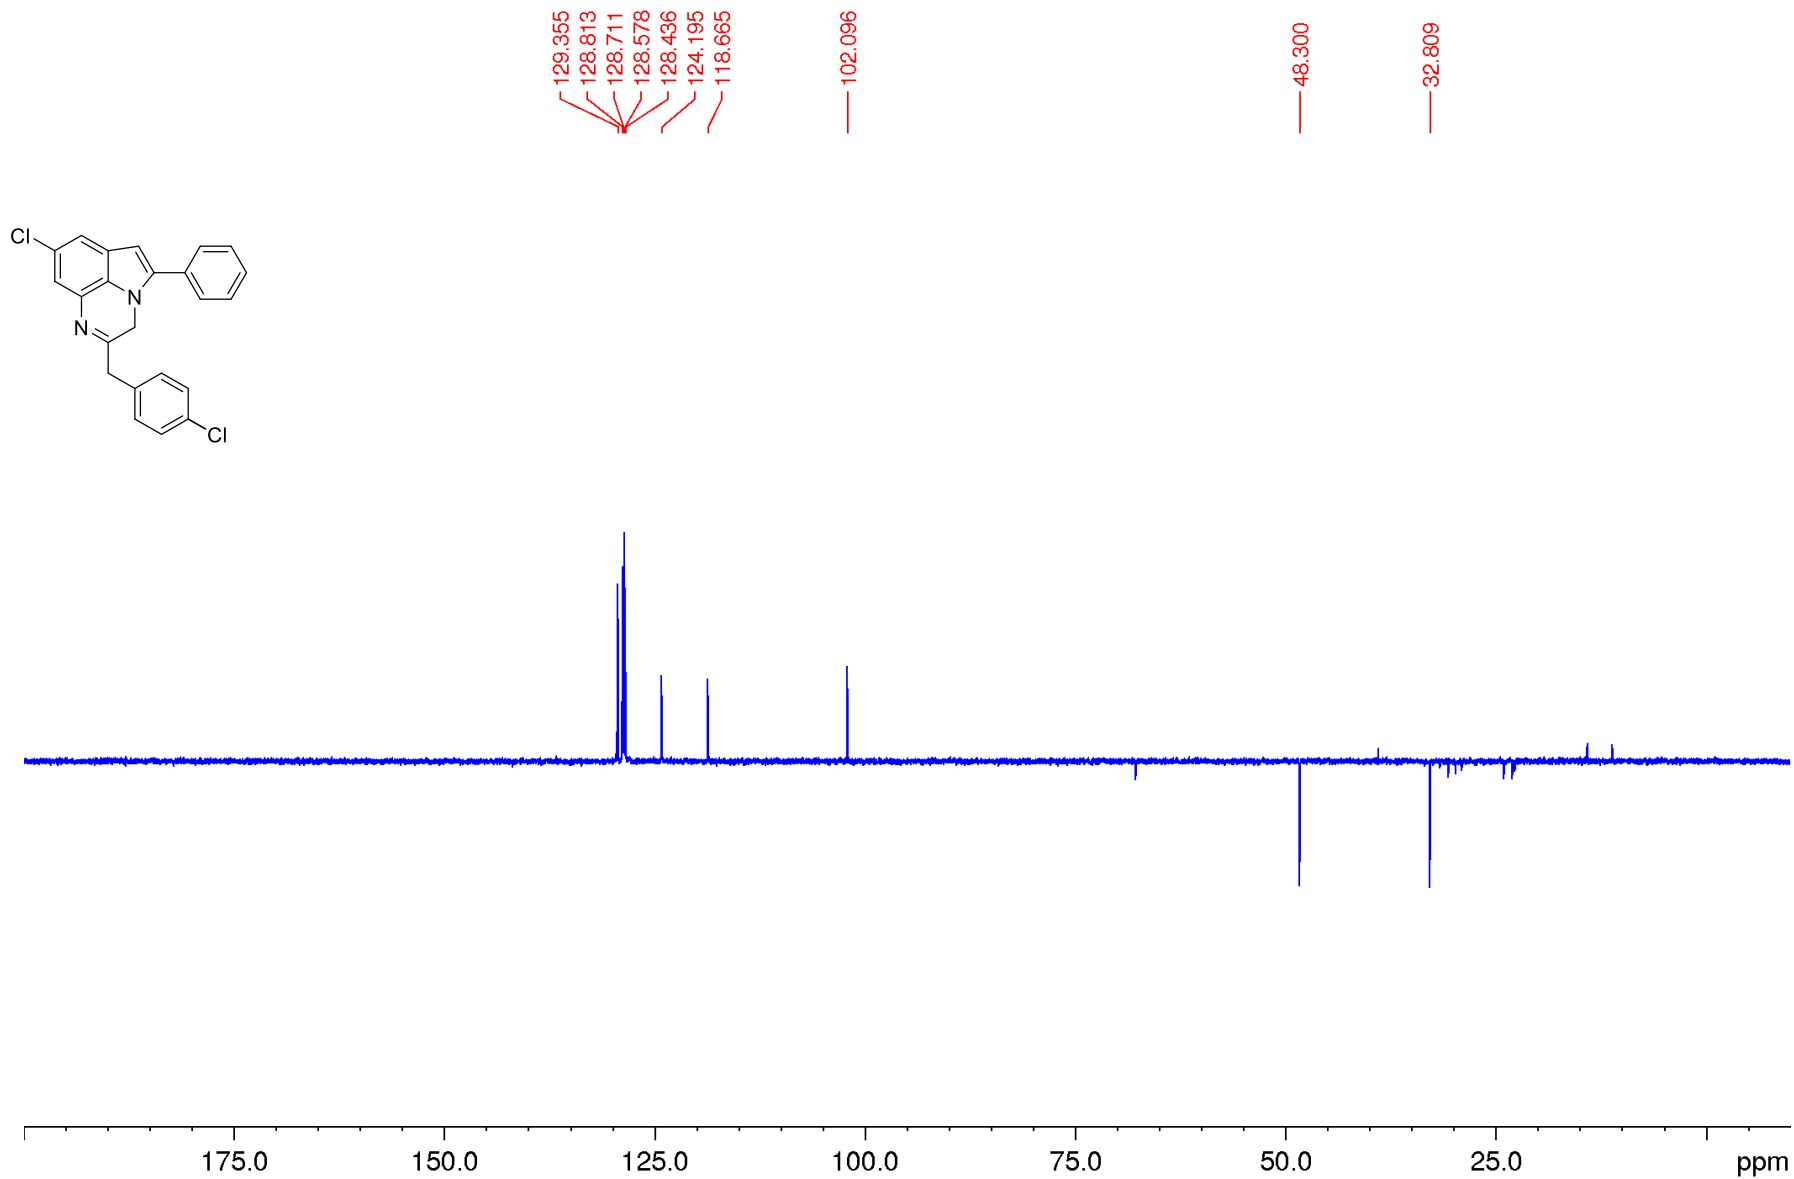

**8-chloro-2-(4-methoxybenzyl)-5-phenyl-3H-pyrrolo[1,2,3-*de*]quinoxaline 2c**

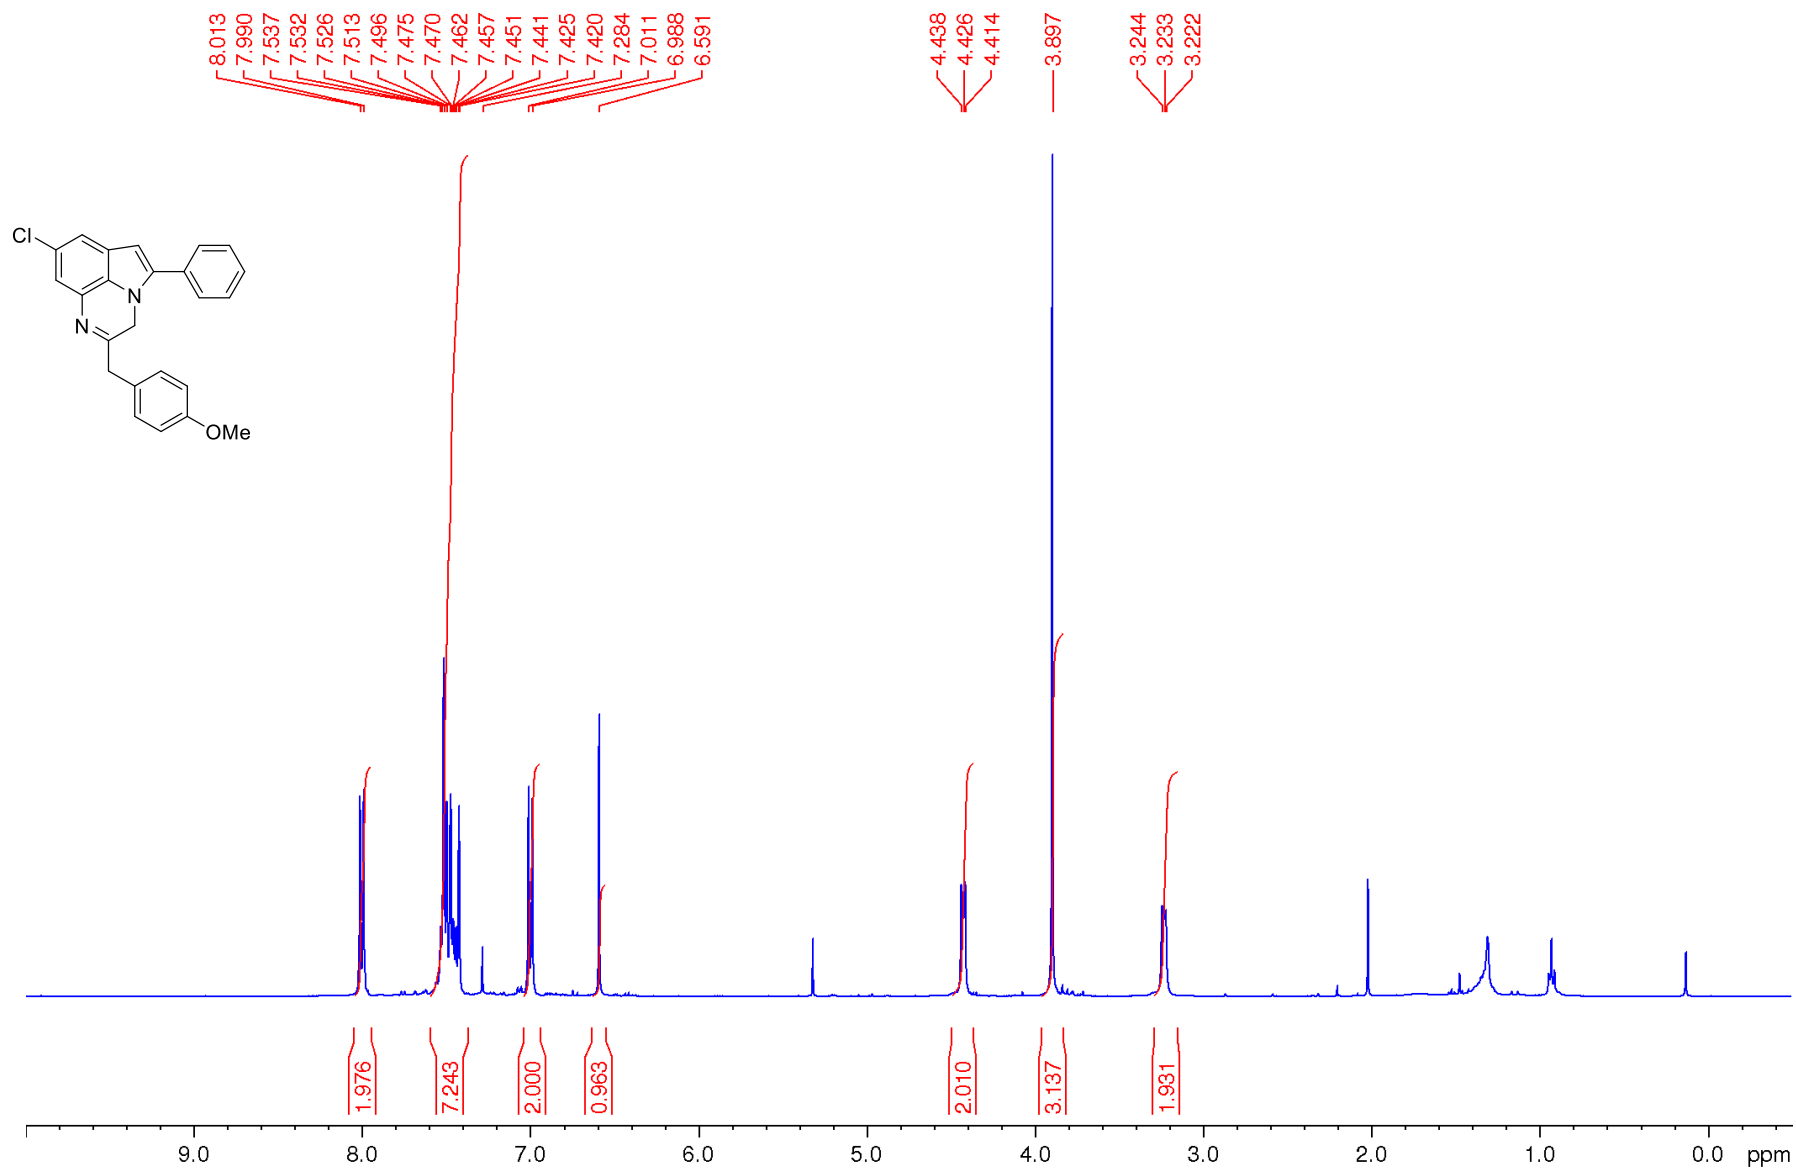

**8-chloro-2-(4-methoxybenzyl)-5-phenyl-3*H*-pyrrolo[1,2,3-*de*]quinoxaline 2c**

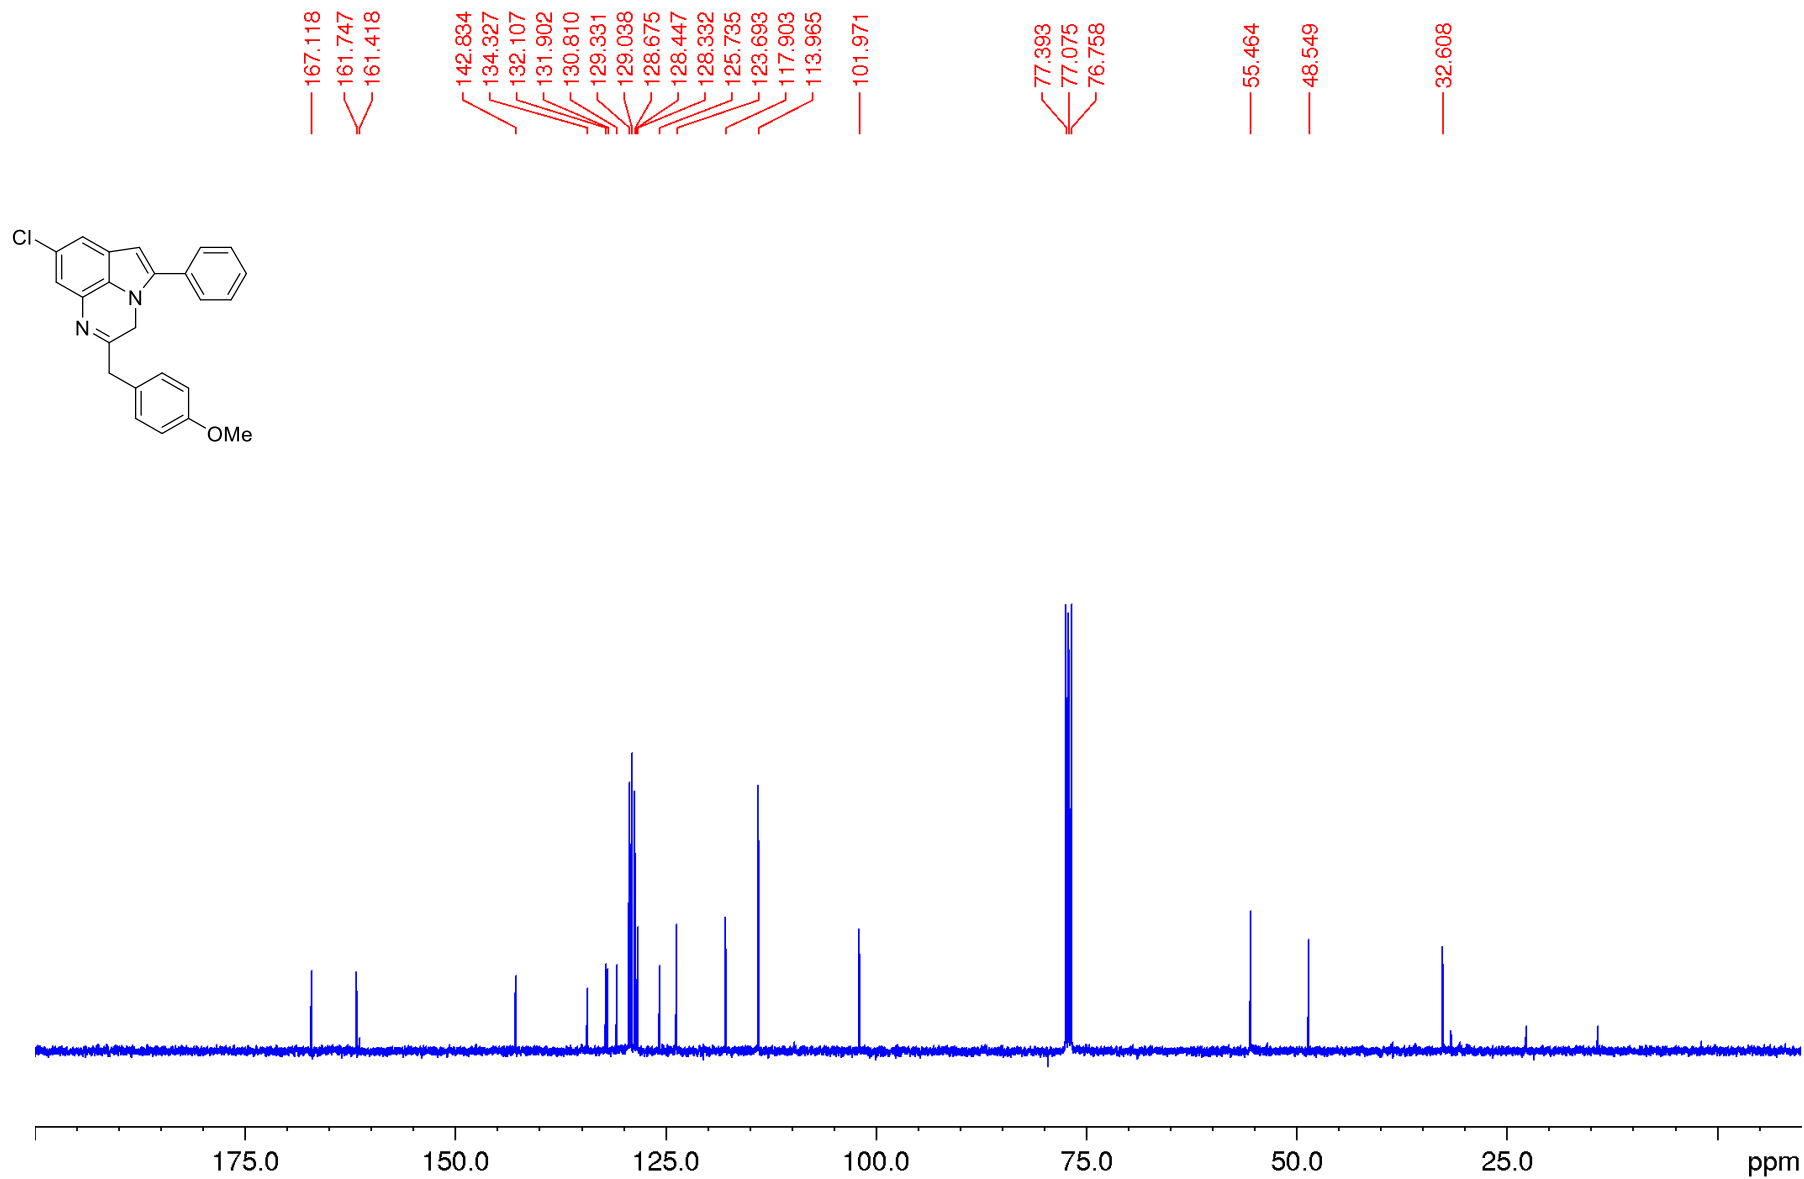

**8-chloro-2-(4-methoxybenzyl)-5-phenyl-3*H*-pyrrolo[1,2,3-*de*]quinoxaline 2c**

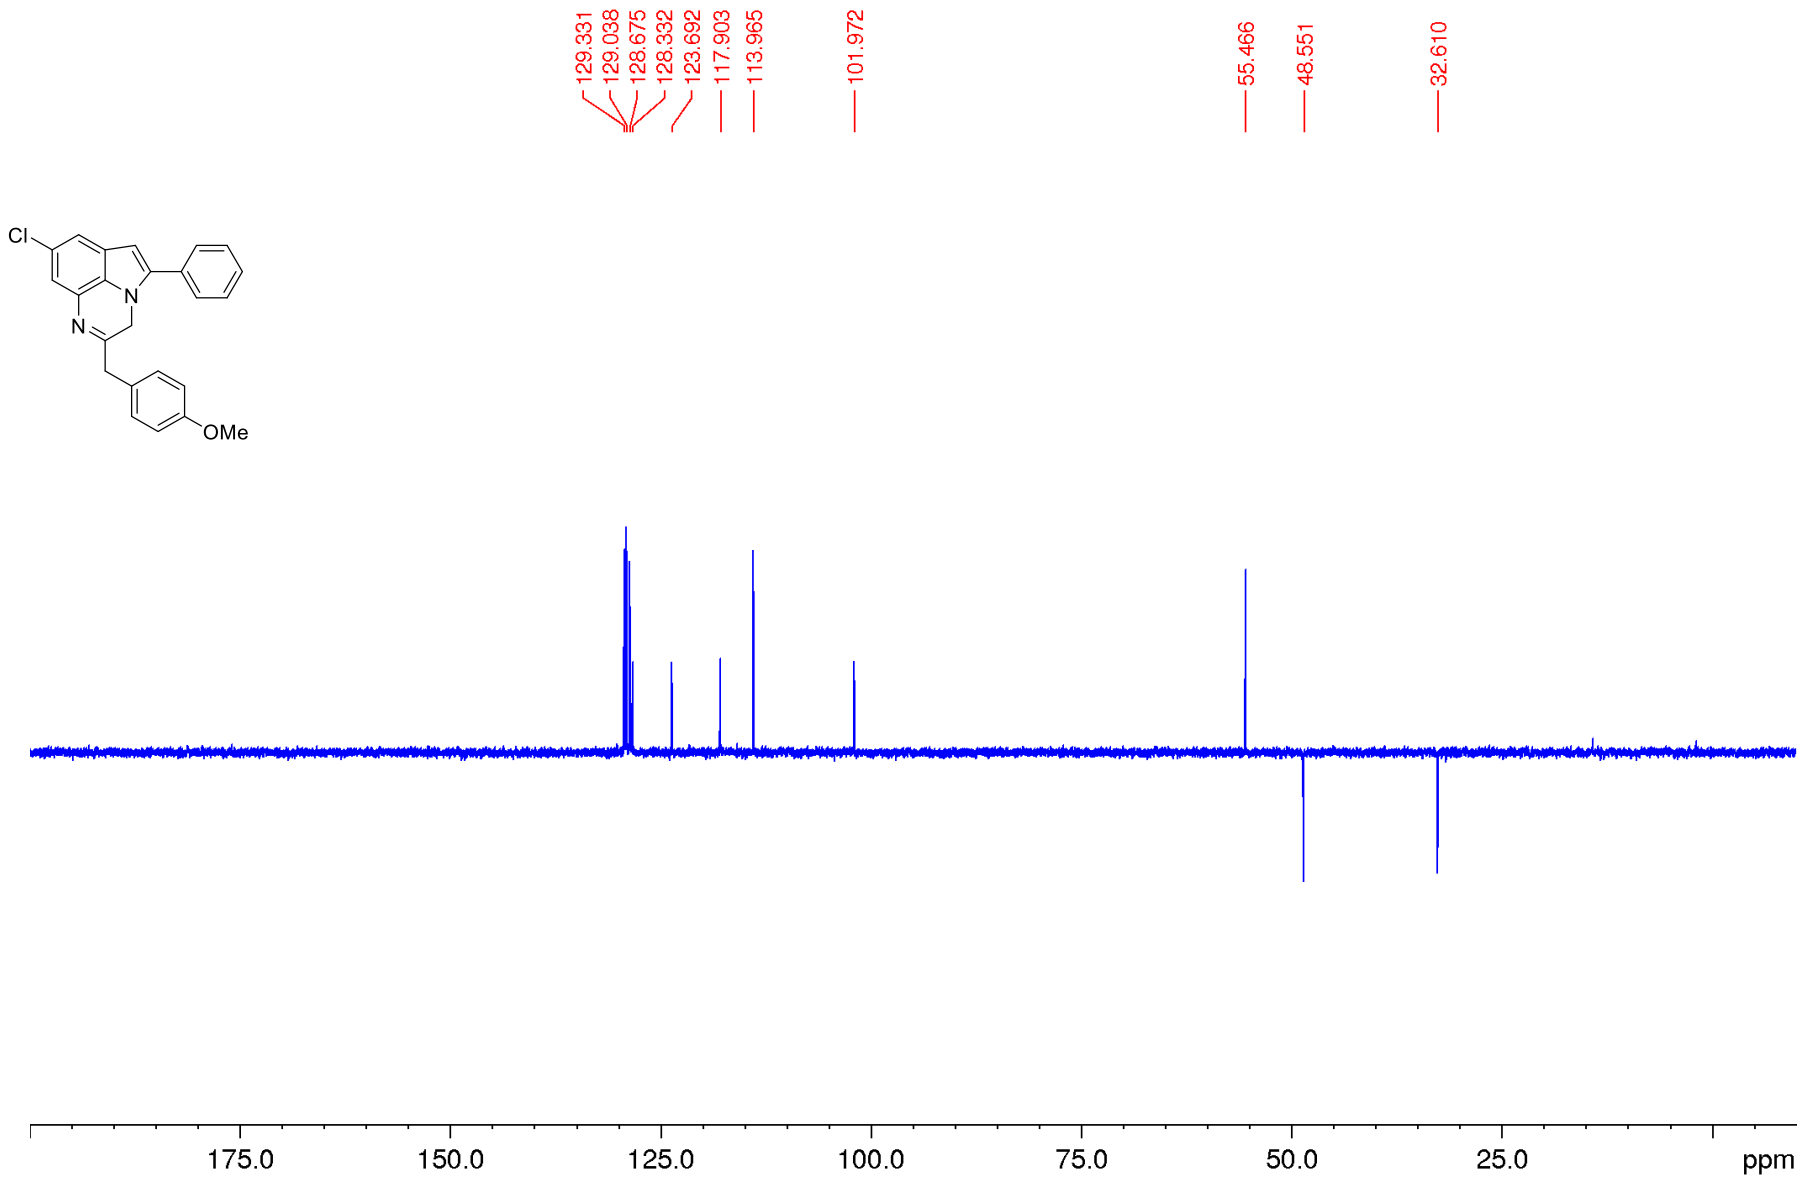

**1-(4-((8-chloro-5-phenyl-3H-pyrrolo[1,2,3-de]quinoxalin-2-yl)methyl)phenyl)ethan-1-one 2d**

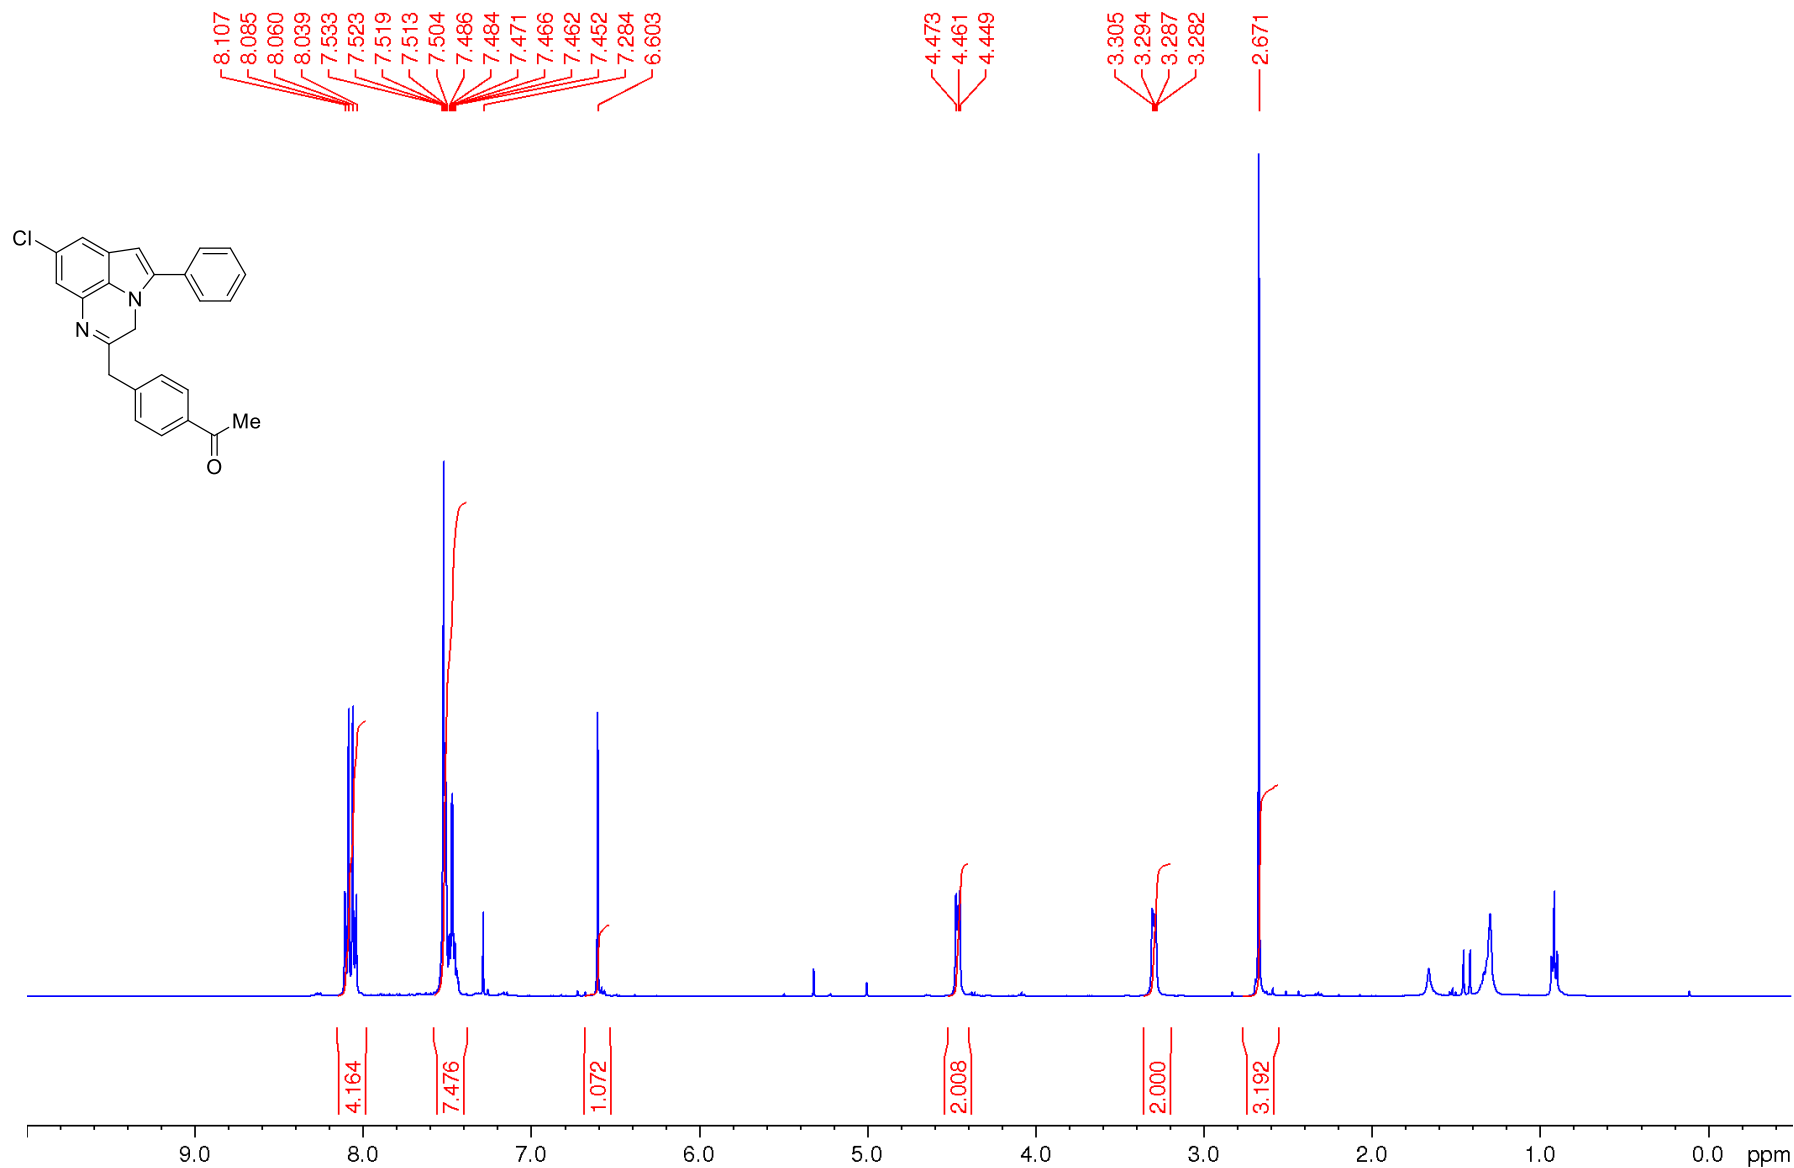



**1-(4-((8-chloro-5-phenyl-3H-pyrrolo[1,2,3-de]quinoxalin-2-yl)methyl)phenyl)ethan-1-one 2d**

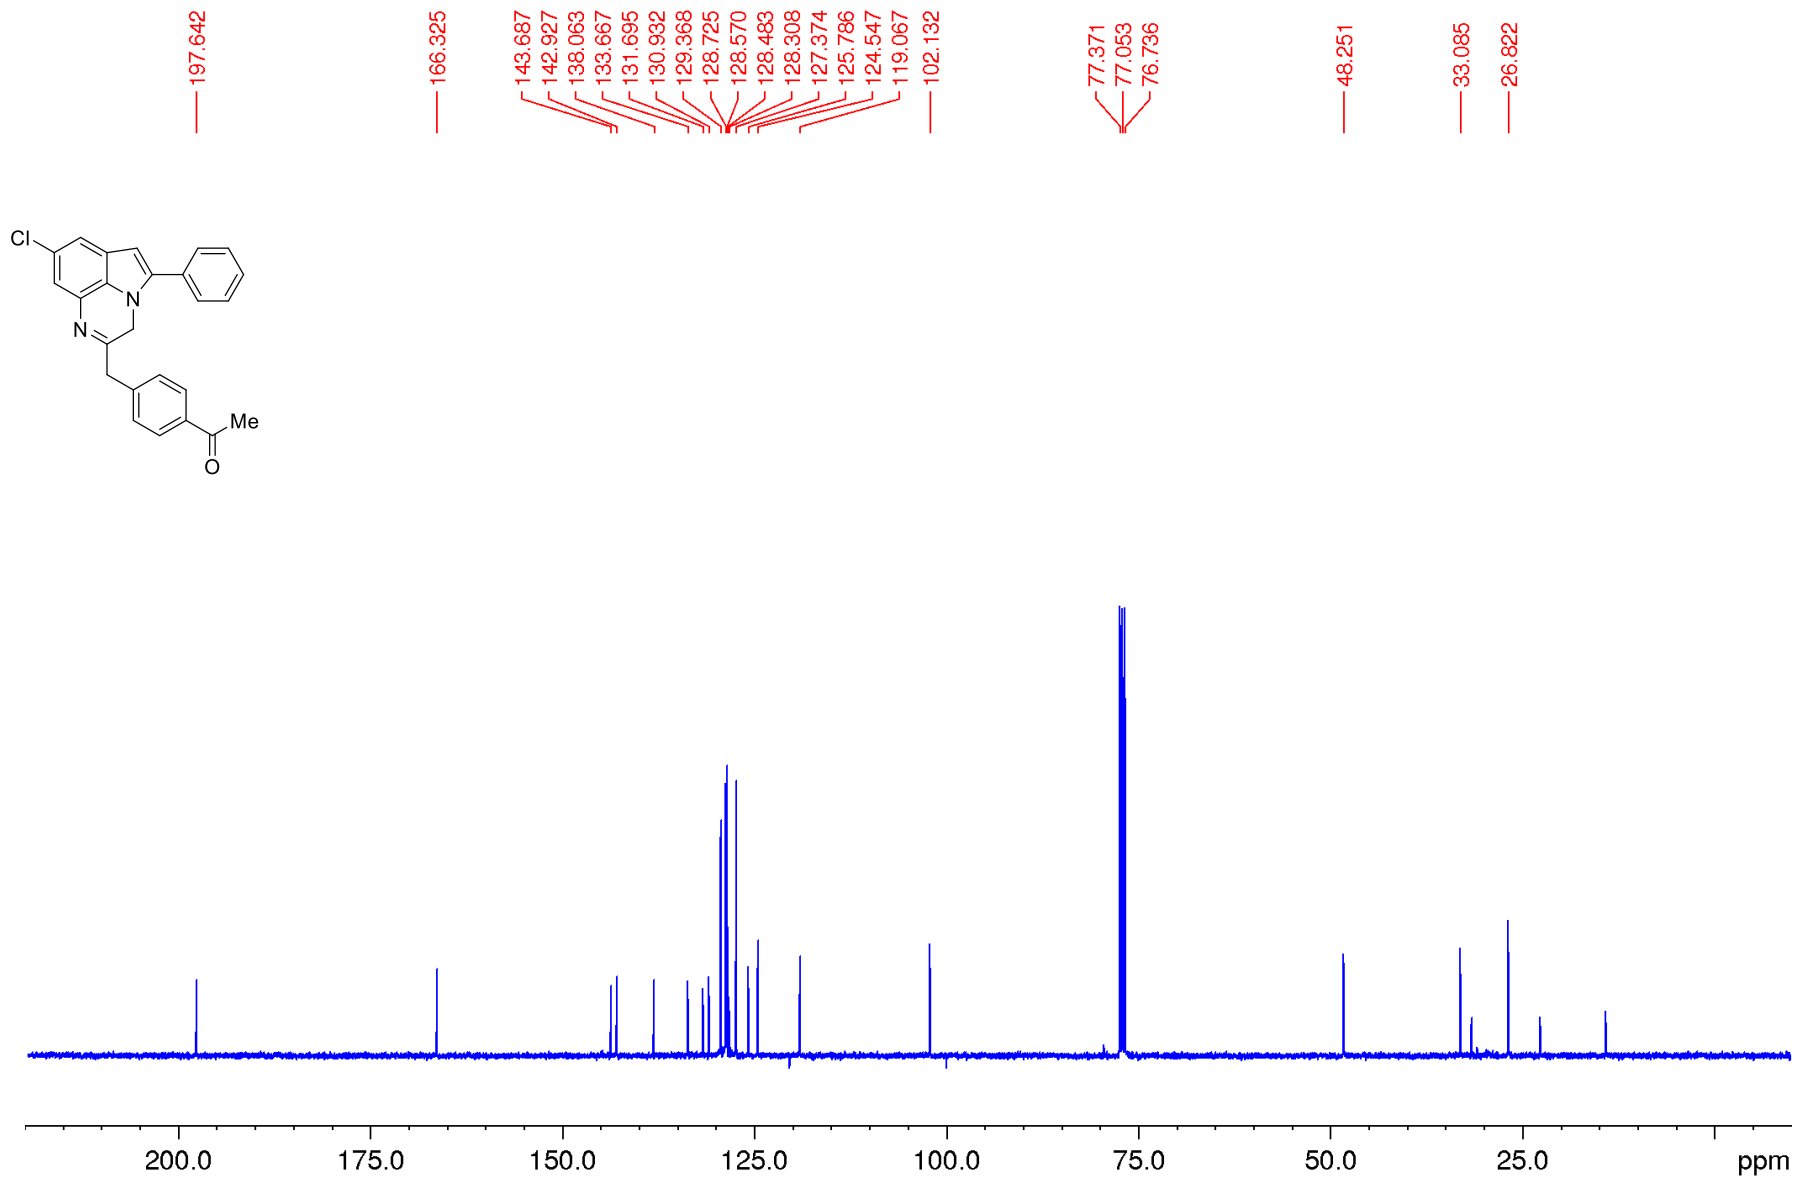

**1-(4-((8-chloro-5-phenyl-3H-pyrrolo[1,2,3-*de*]quinoxalin-2-yl)methyl)phenyl)ethan-1-one 2d**

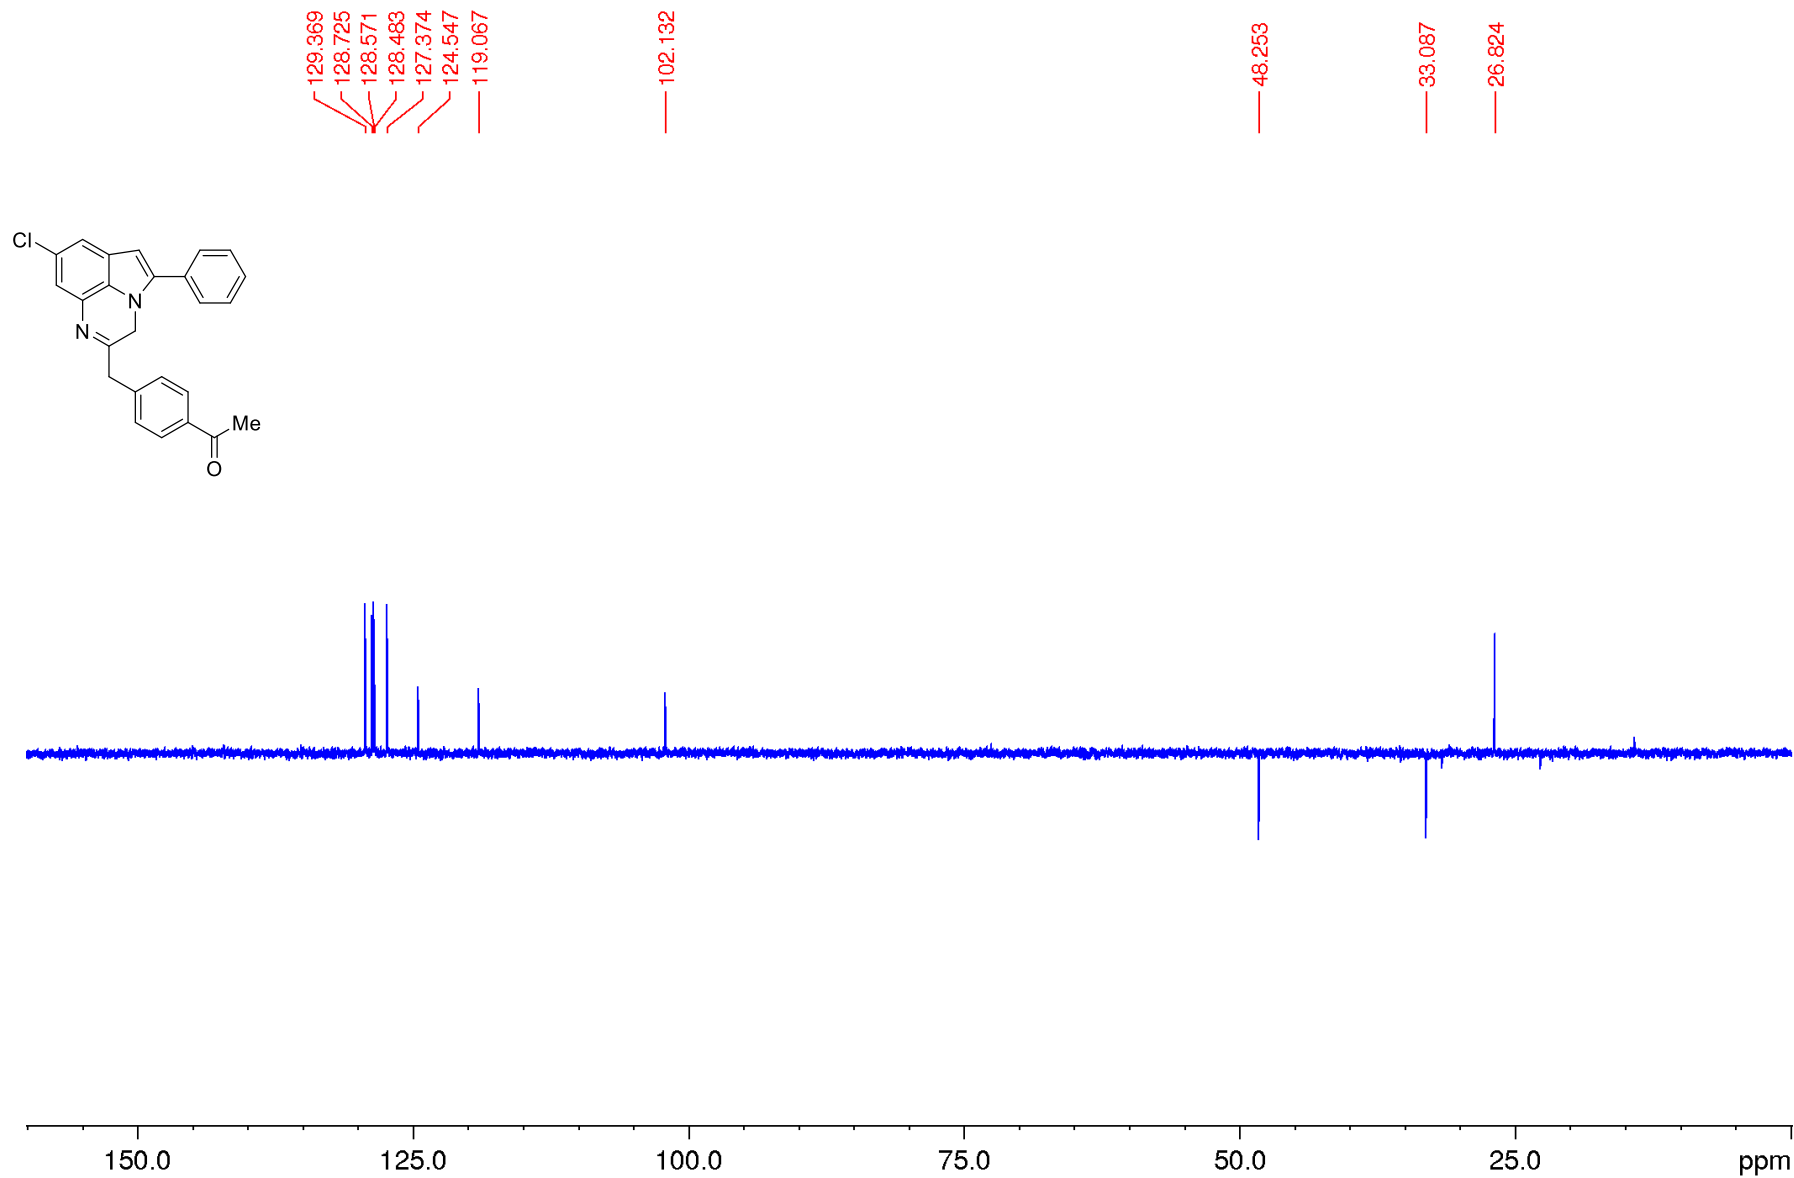

**8-chloro-5-(4-methoxyphenyl)-2-(3-(trifluoromethyl)benzyl)-3H-pyrrolo[1,2,3-*de*]quinoxaline 2e**

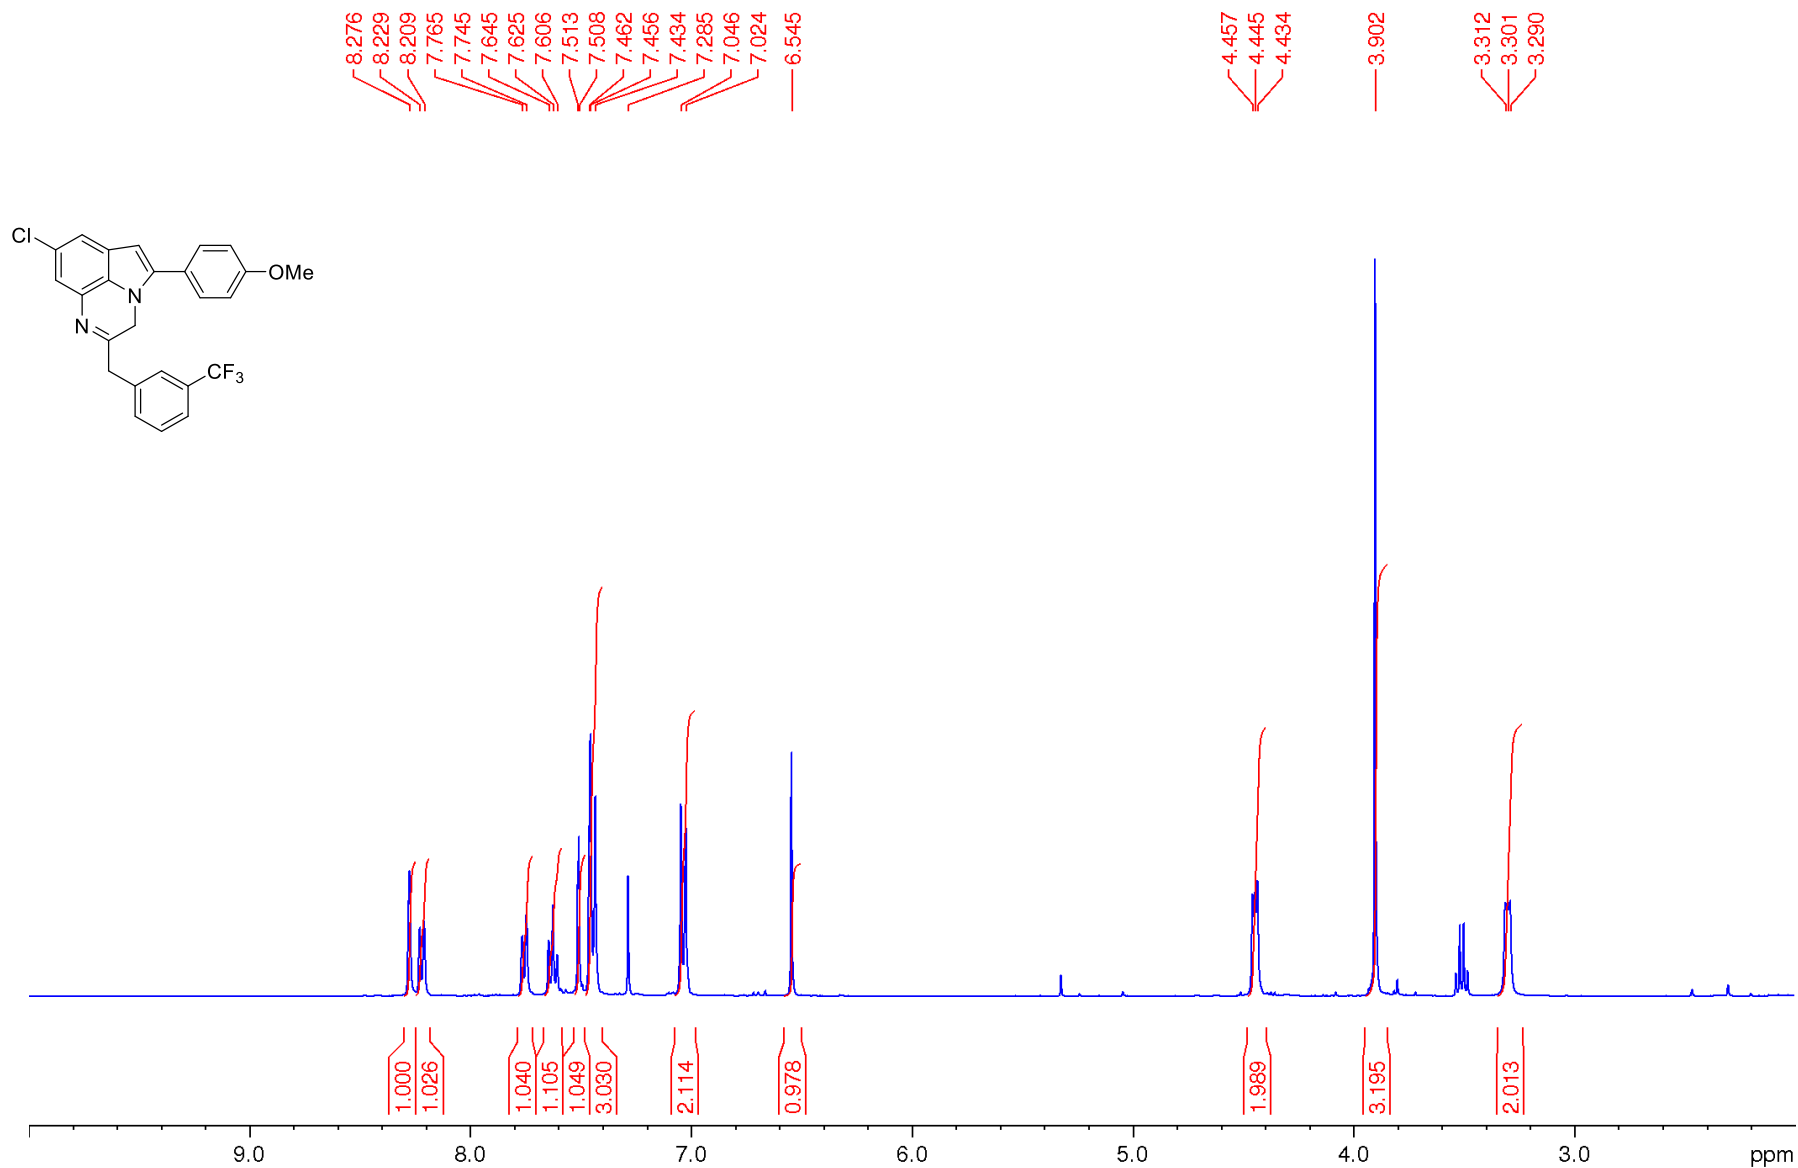

**8-chloro-5-(4-methoxyphenyl)-2-(3-(trifluoromethyl)benzyl)-3H-pyrrolo[1,2,3-*de*]quinoxaline 2e**

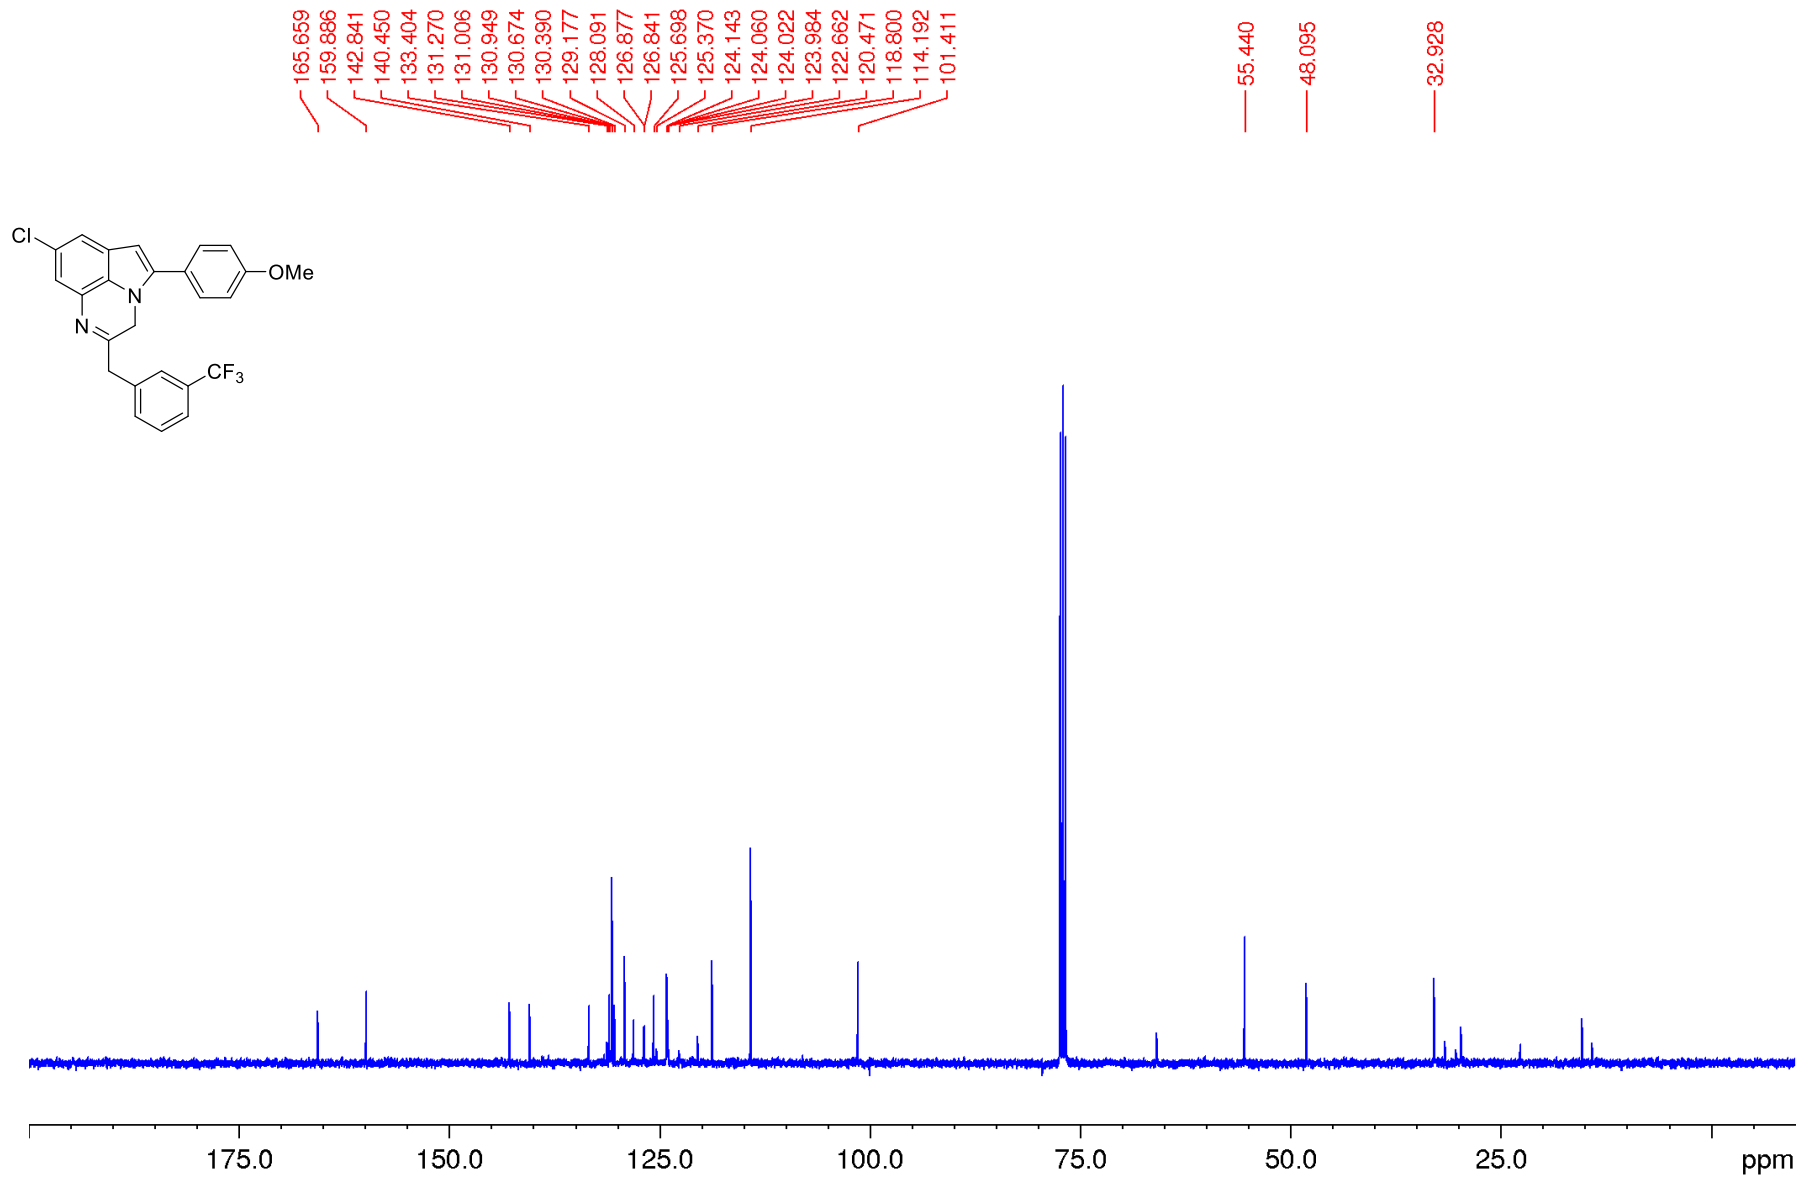

**8-chloro-5-(4-methoxyphenyl)-2-(3-(trifluoromethyl)benzyl)-3H-pyrrolo[1,2,3-*de*]quinoxaline 2e**

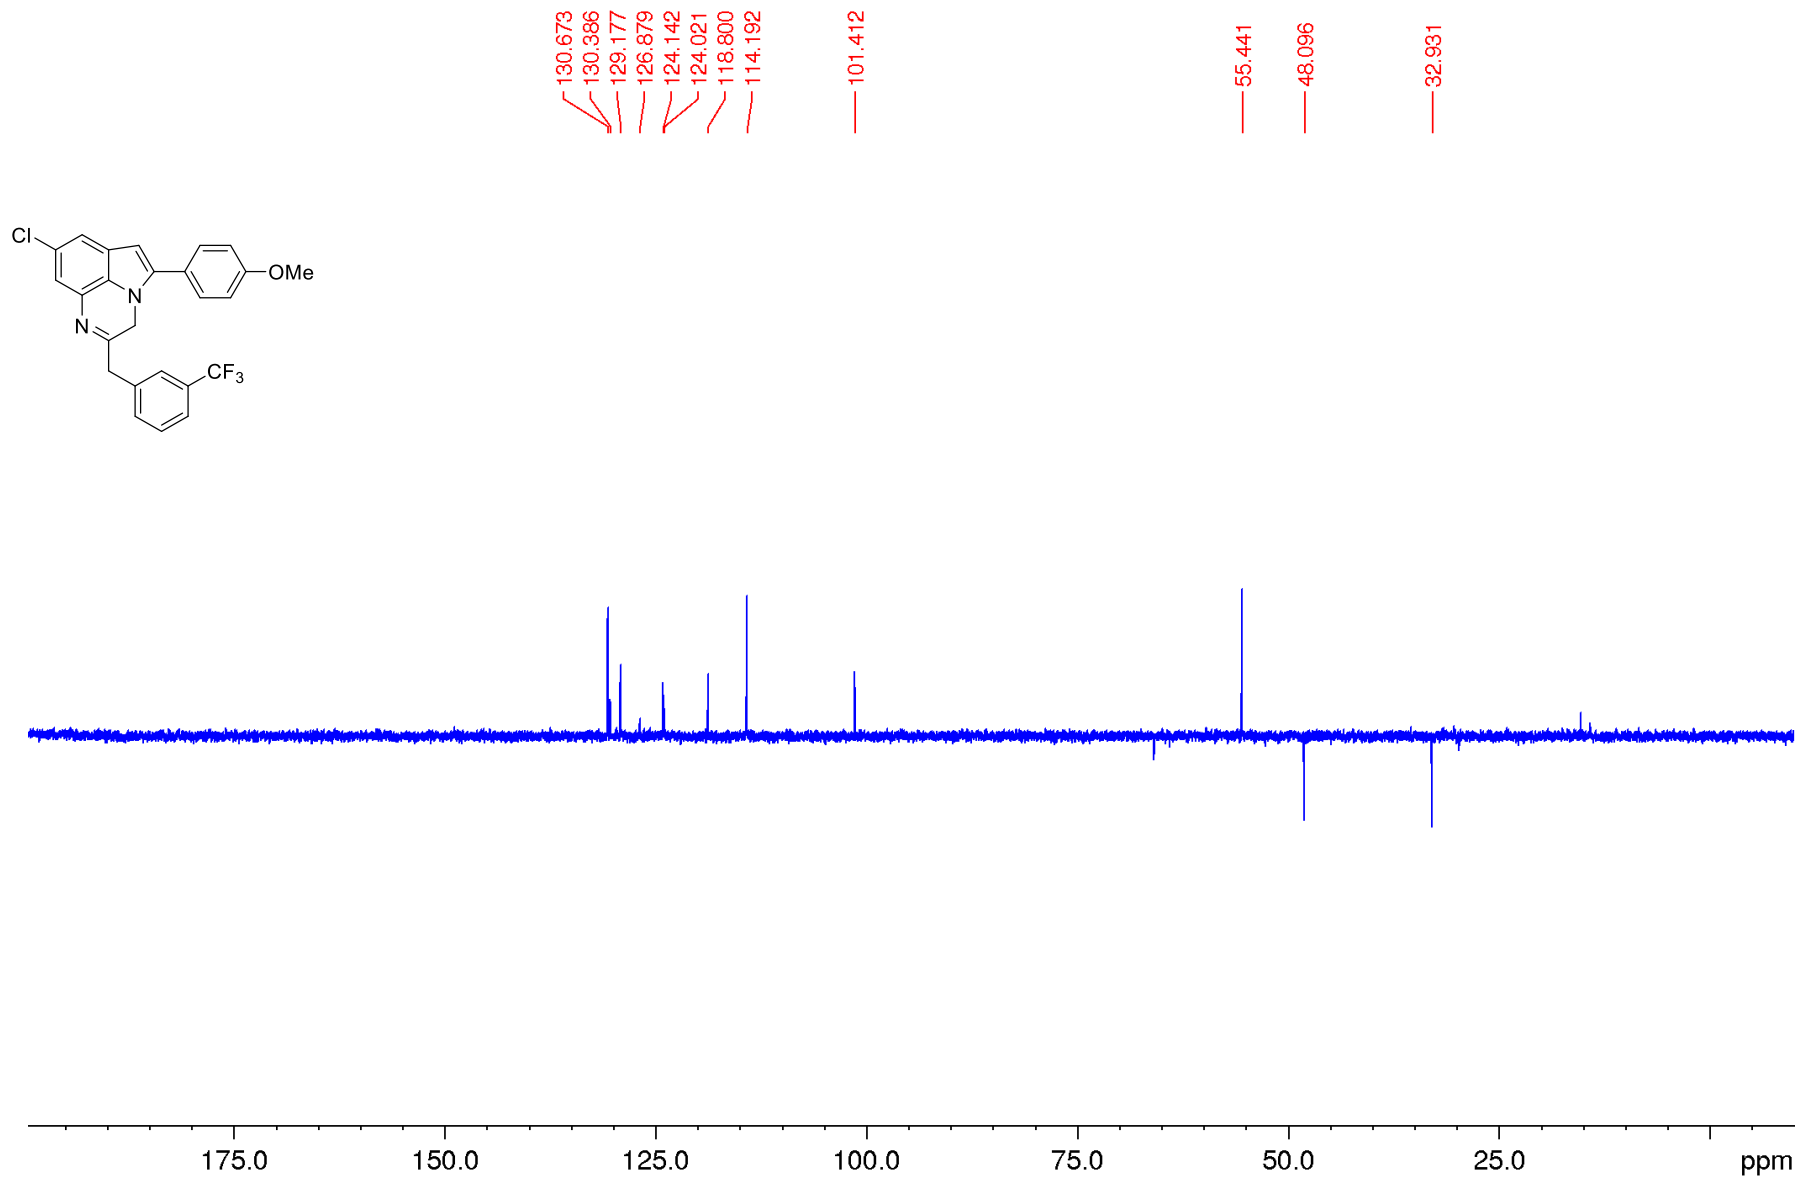

**8-chloro-5-(4-methoxyphenyl)-2-(3-(trifluoromethyl)benzyl)-3H-pyrrolo[1,2,3-*de*]quinoxaline 2e**

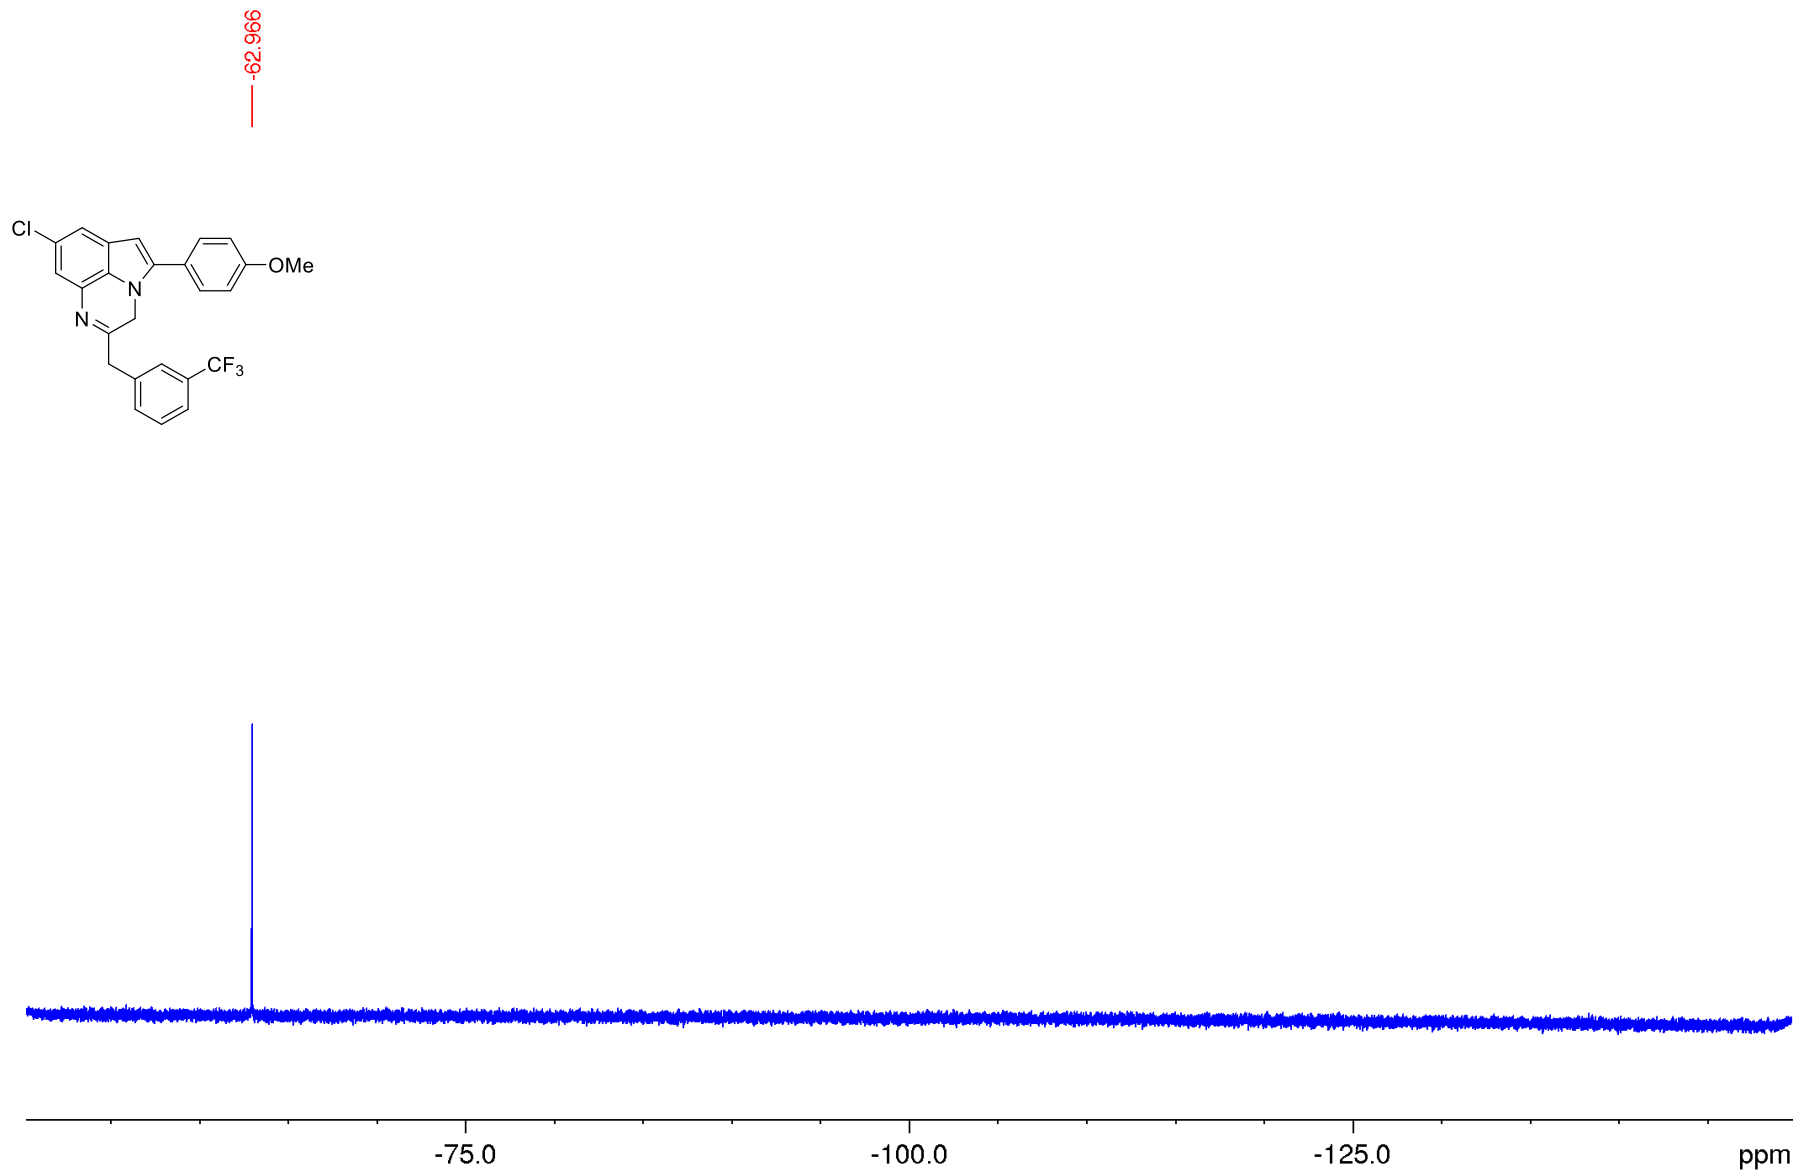

**8-chloro-2-(4-methoxybenzyl)-5-(4-methoxyphenyl)-3H-pyrrolo[1,2,3-de]quinoxaline 2f**

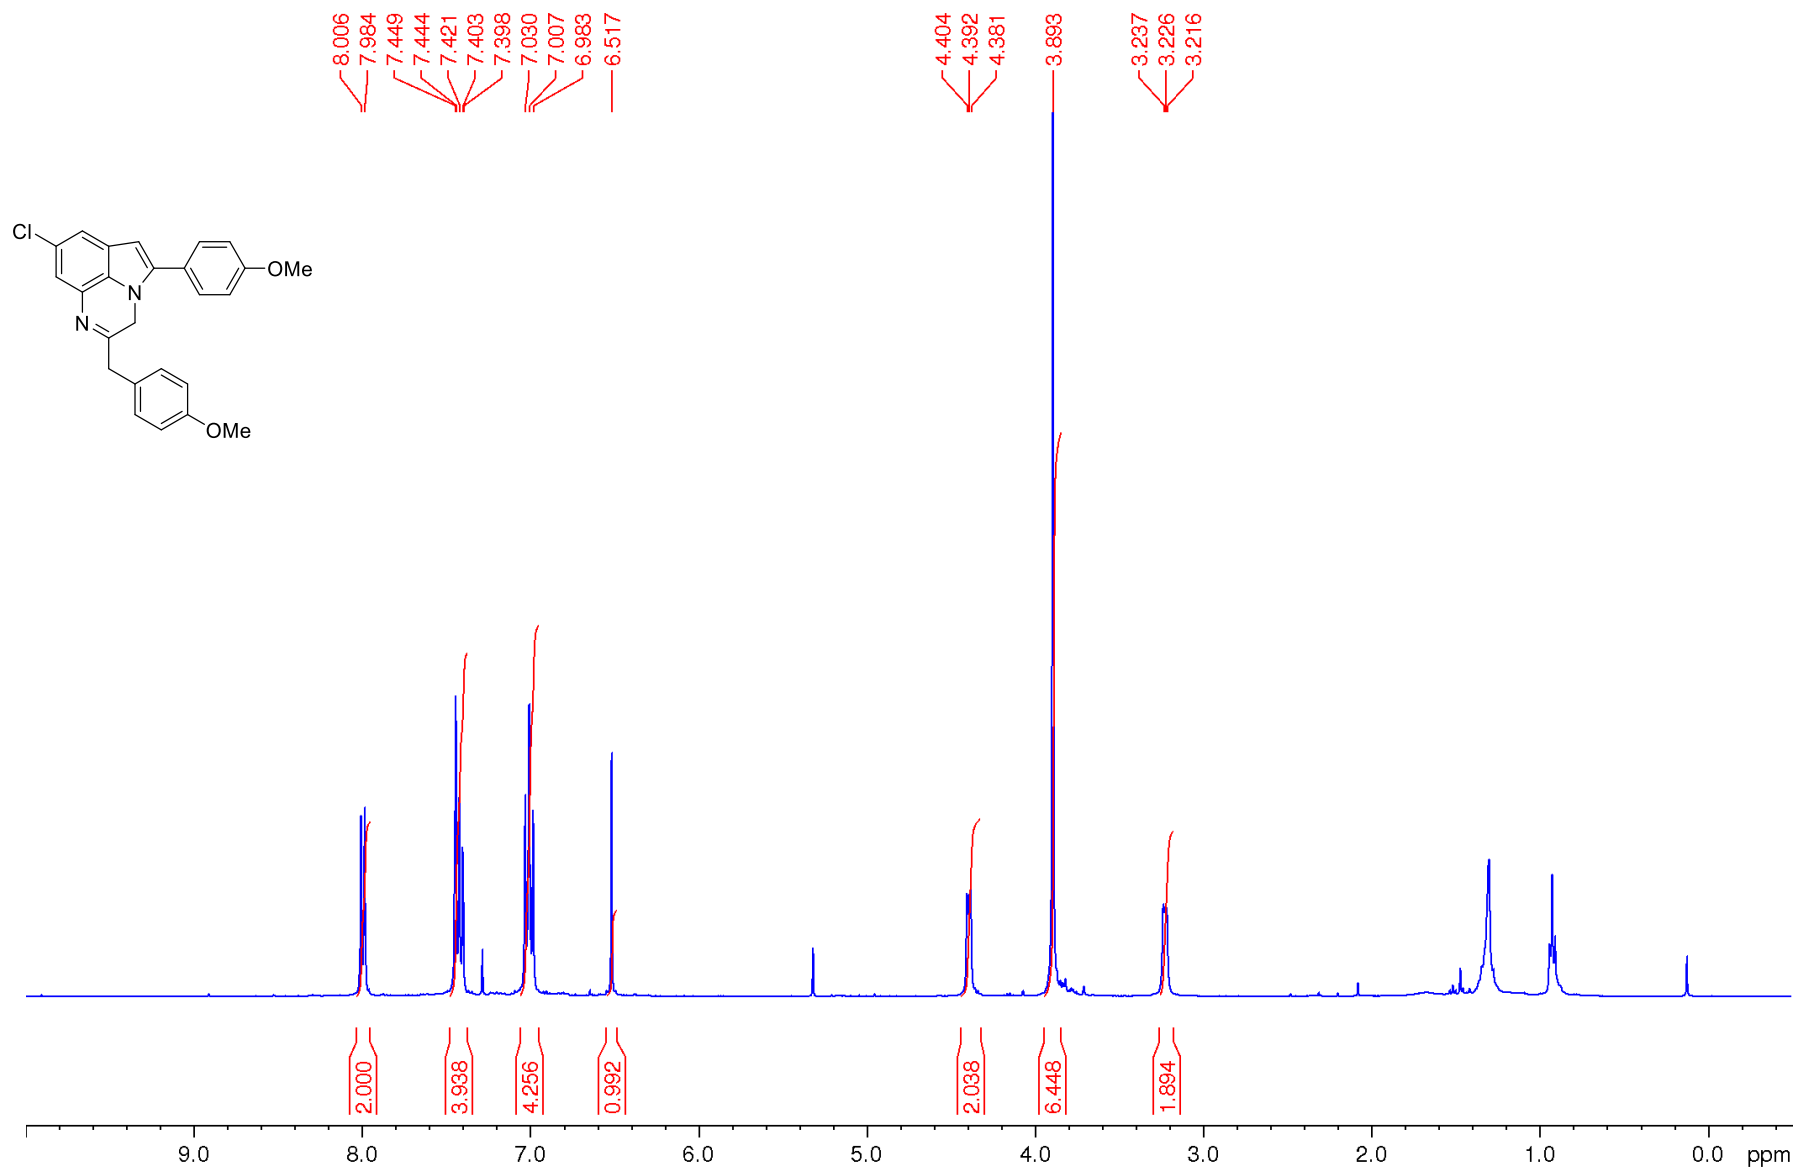

**8-chloro-2-(4-methoxybenzyl)-5-(4-methoxyphenyl)-3H-pyrrolo[1,2,3-*de*]quinoxaline 2f**

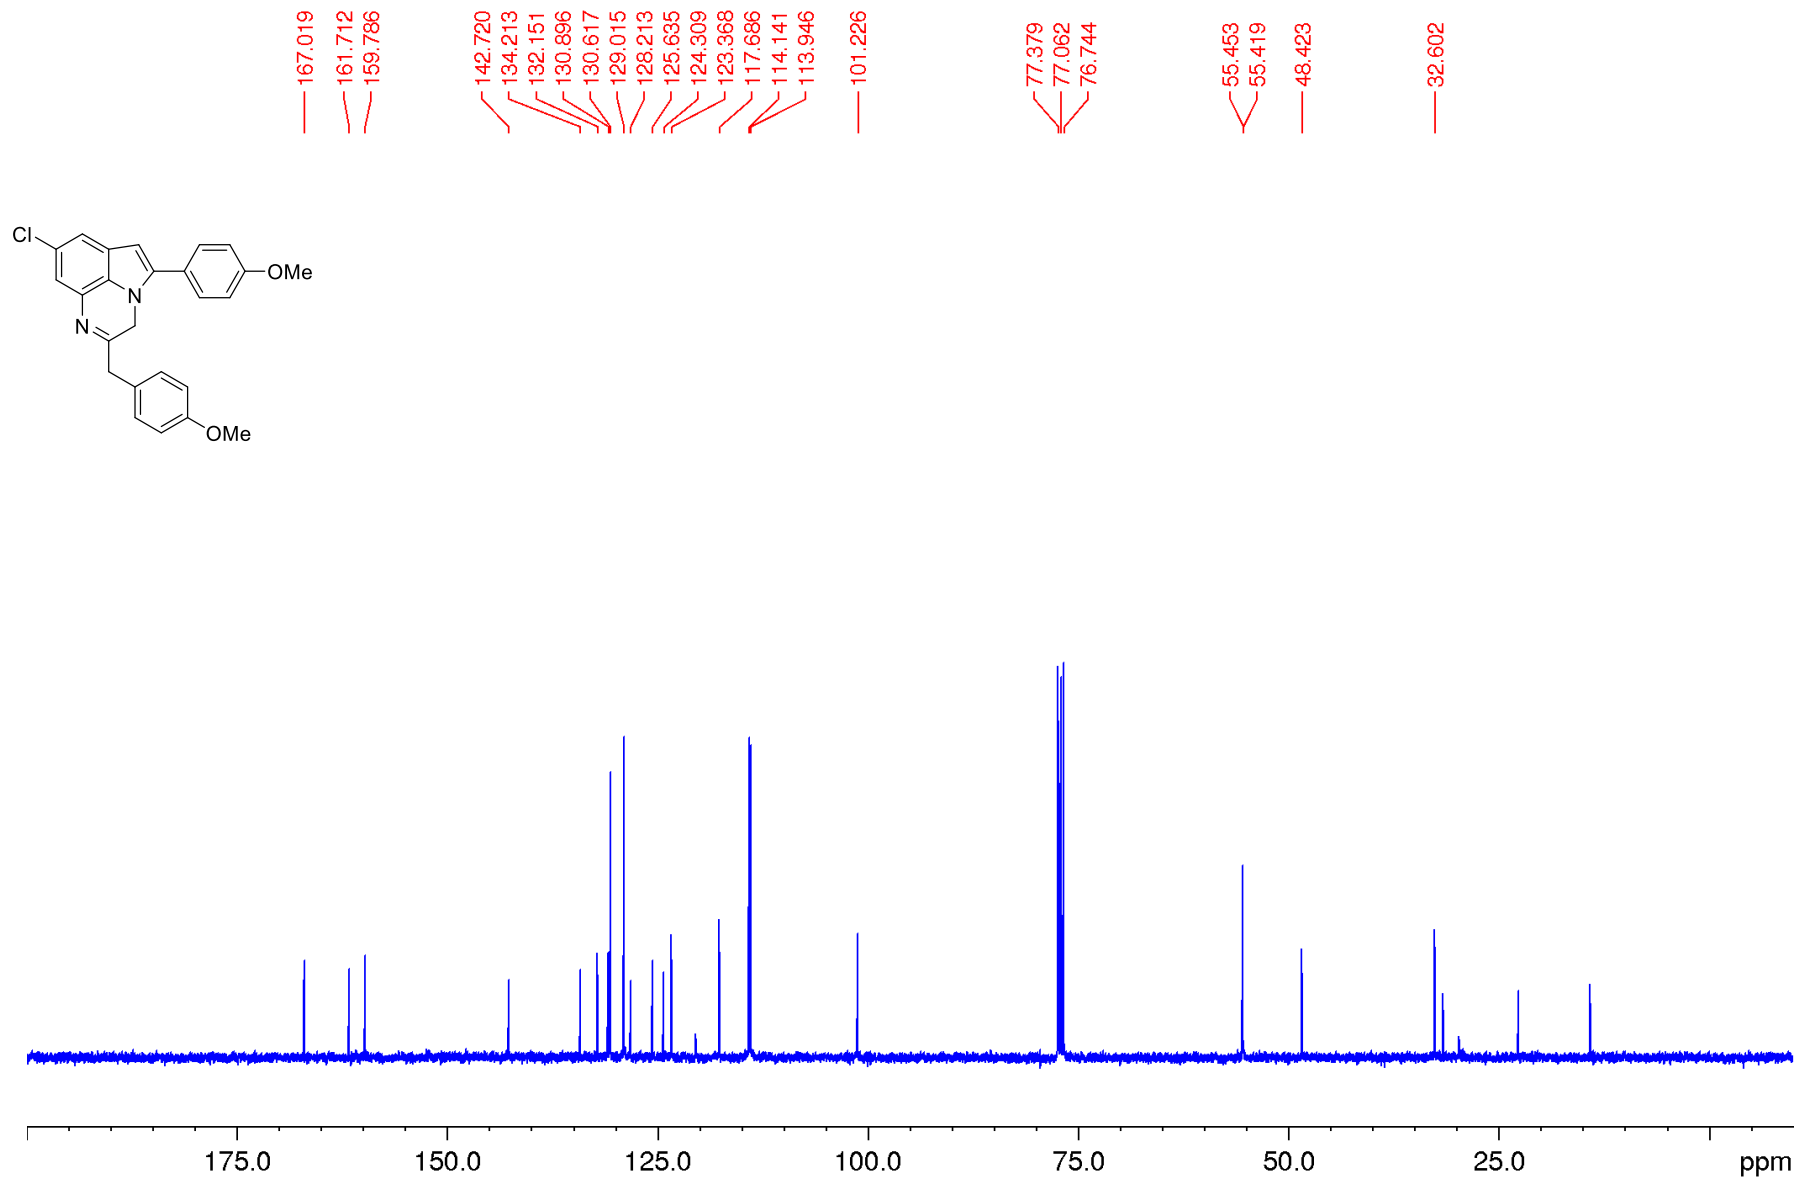



**8-chloro-2-(4-methoxybenzyl)-5-(4-methoxyphenyl)-3H-pyrrolo[1,2,3-*de*]quinoxaline 2f**

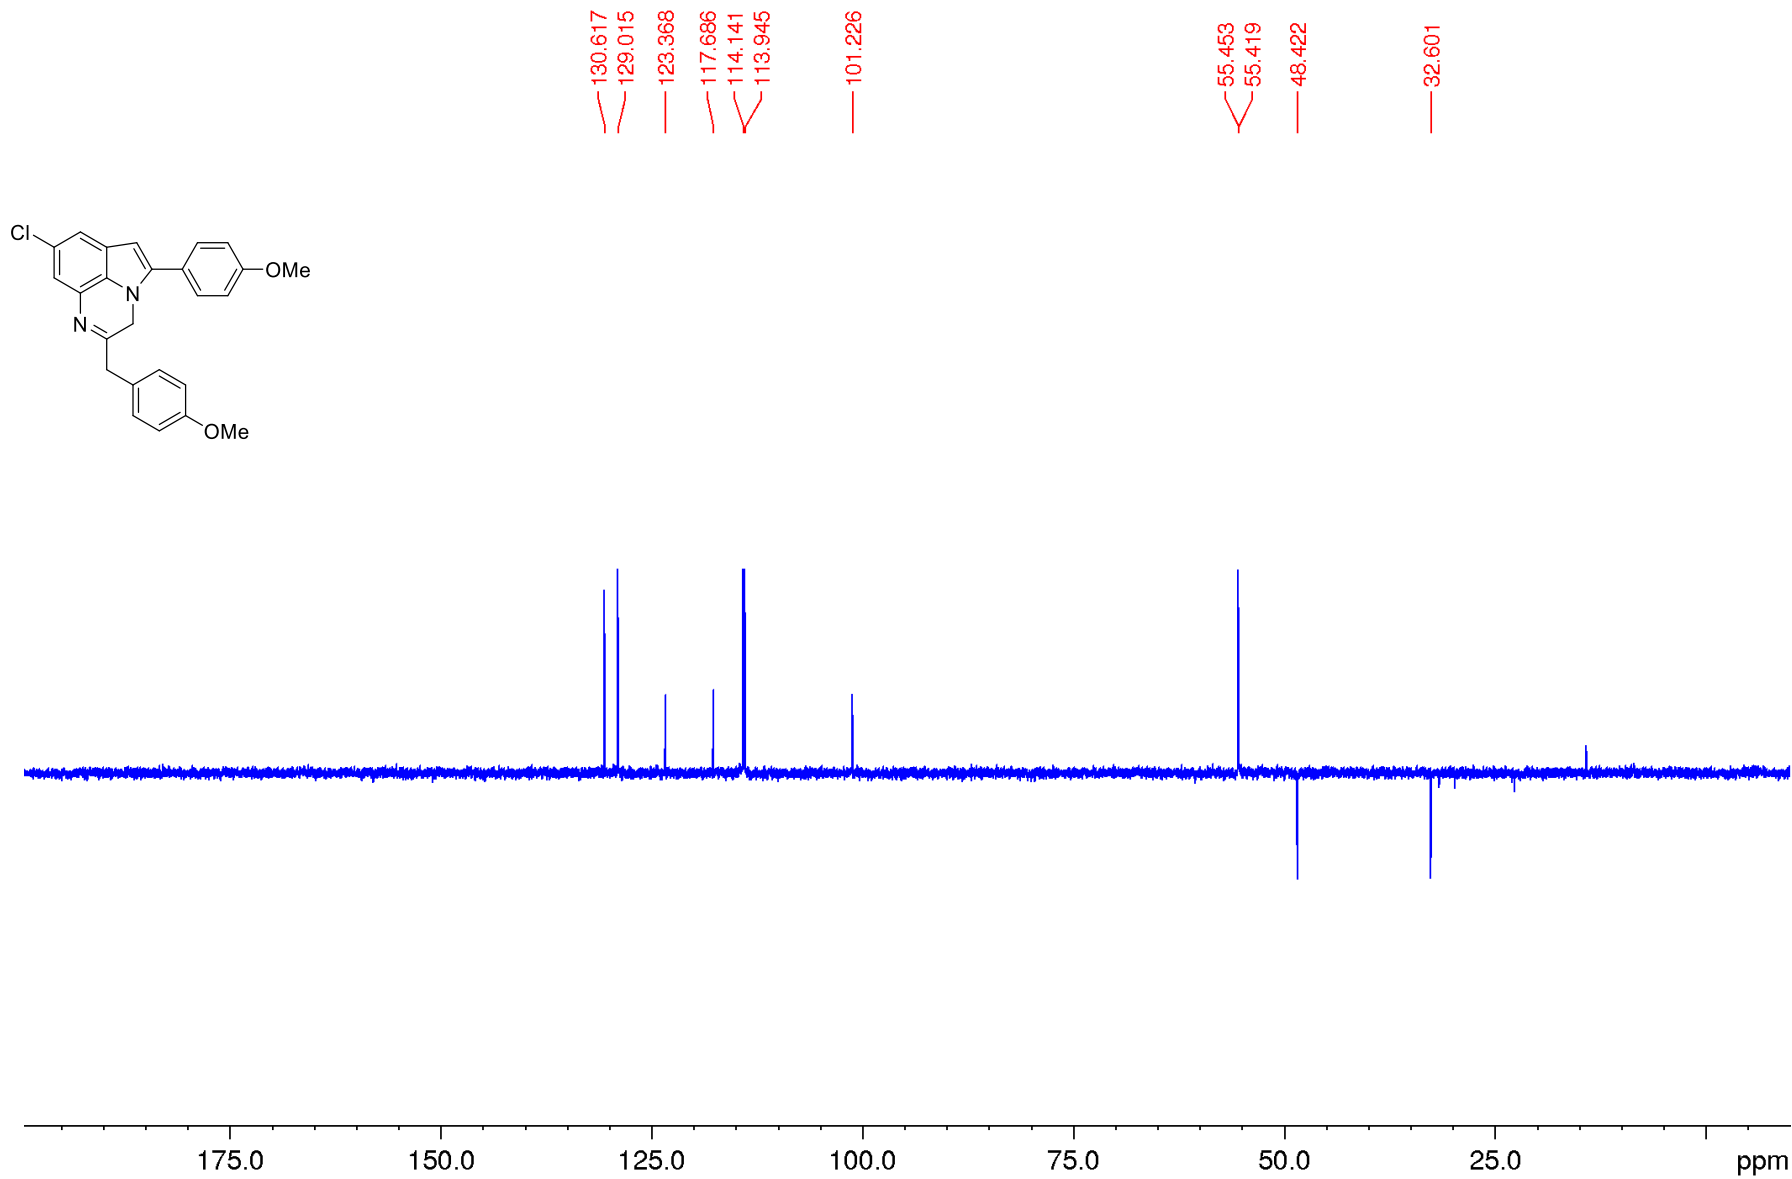

1-(4-((8-methyl-5-phenyl-3H-pyrrolo[1,2,3-de]quinoxalin-2-yl)methyl)phenyl)ethan-1-one 2g

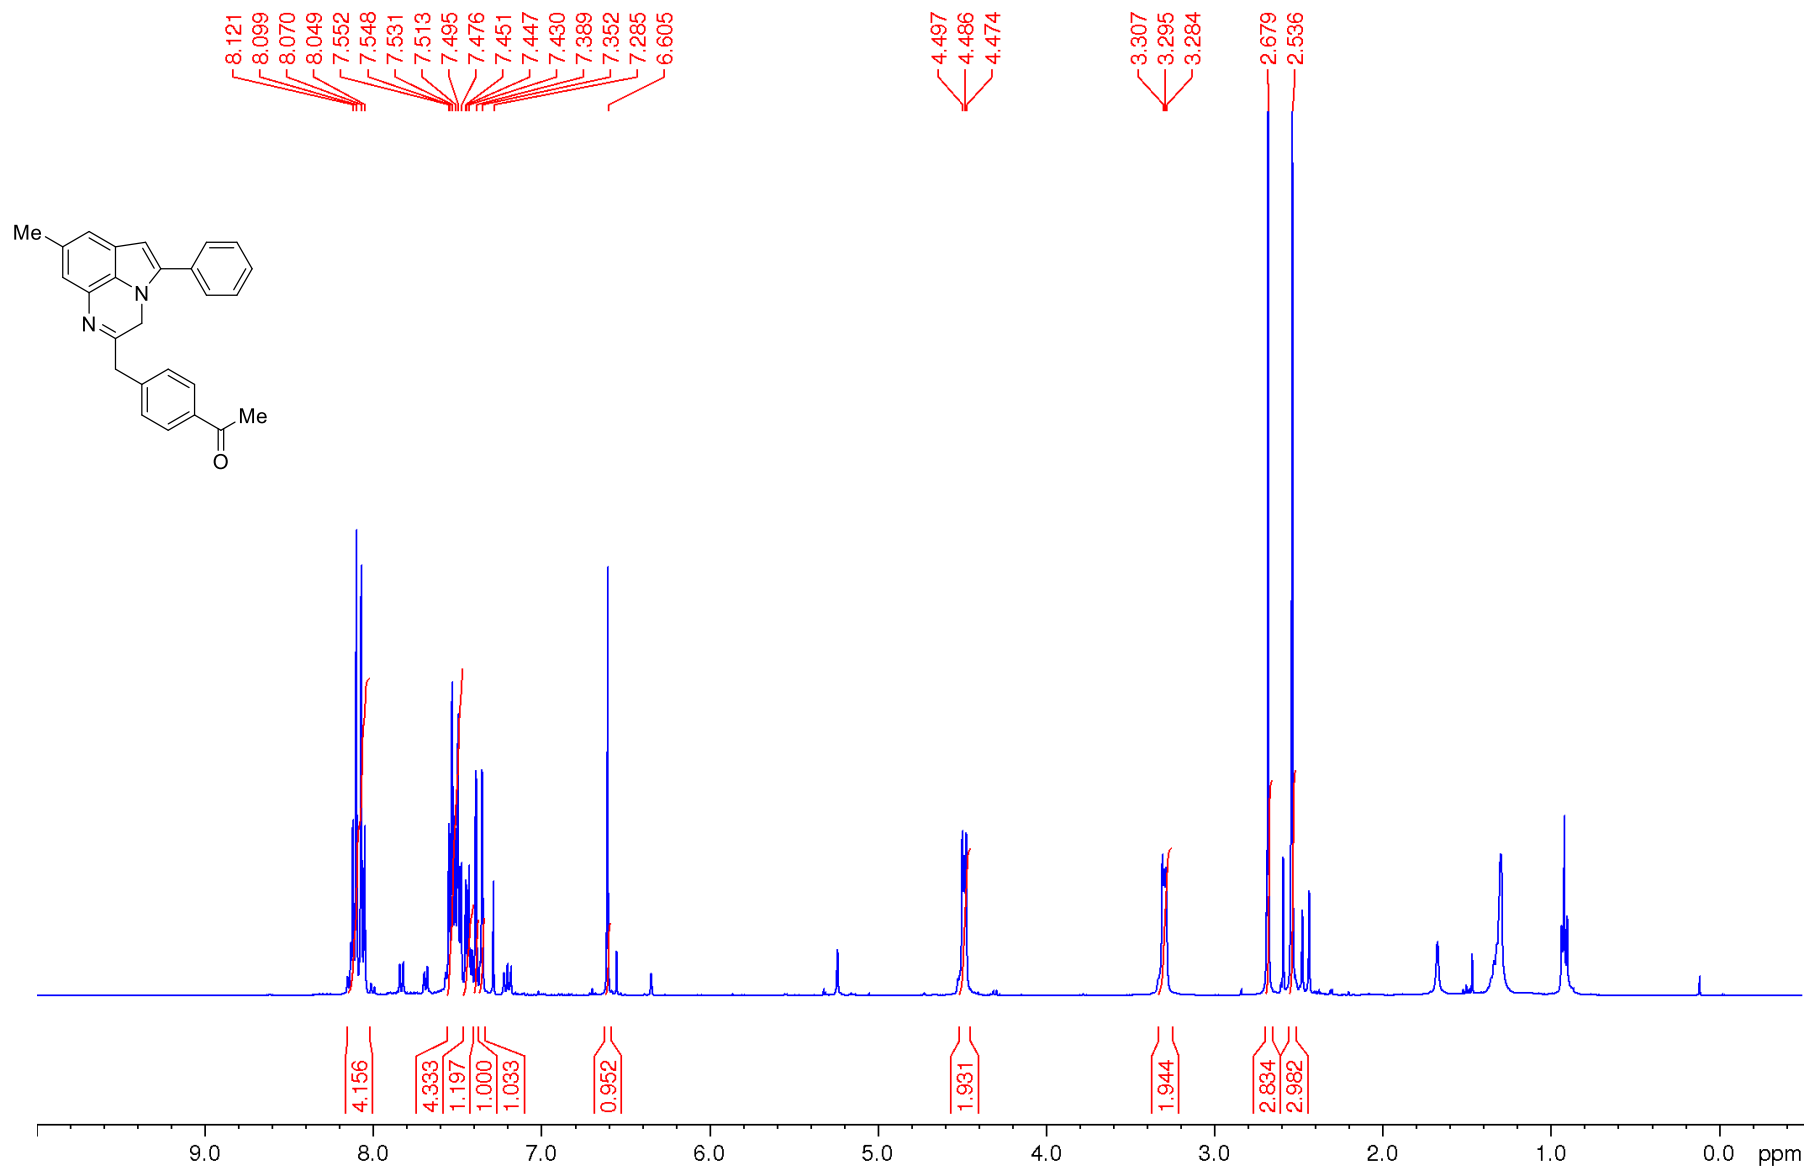

# 1-(4-((8-methyl-5-phenyl-3*H*-pyrrolo[1,2,3-*de*]quinoxalin-2-yl)methyl)phenyl)ethan-1-one 2g

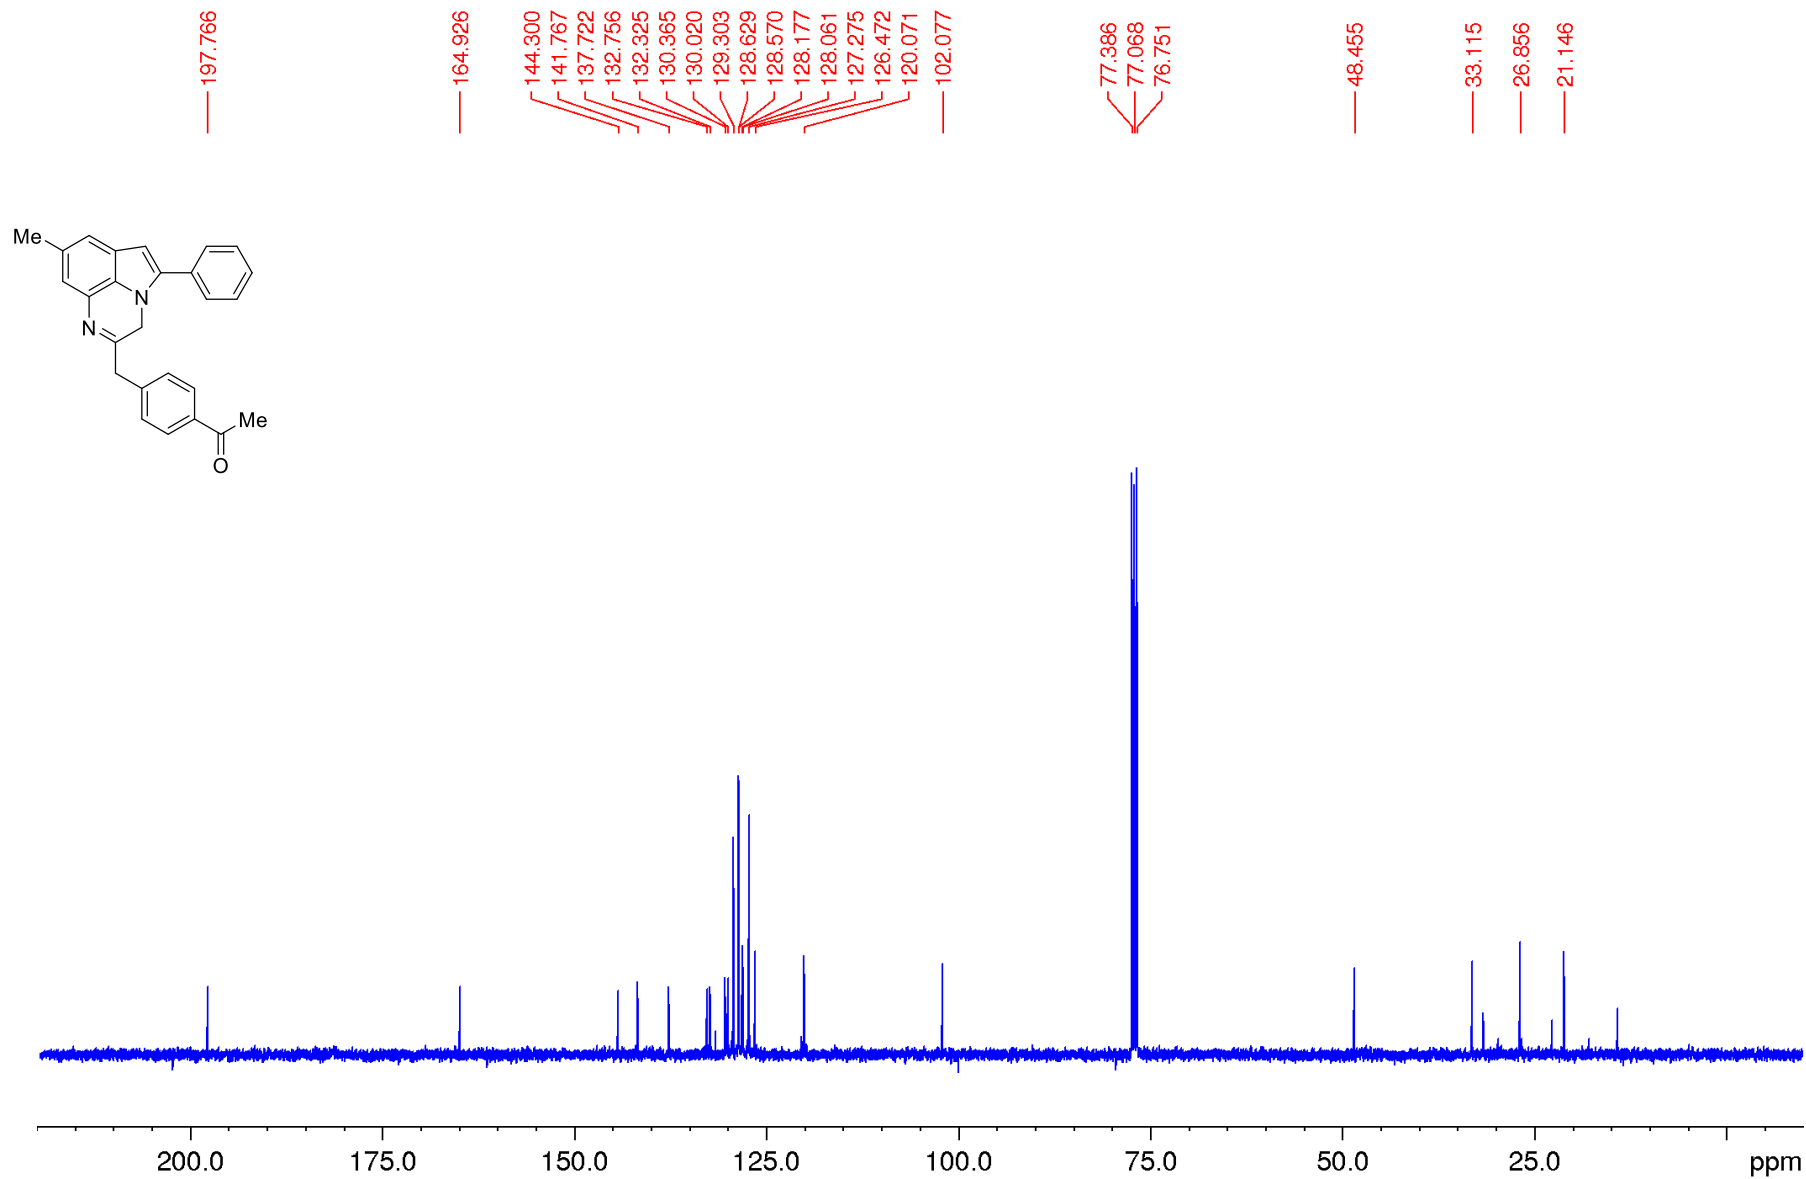

**1-(4-((8-methyl-5-phenyl-3*H*-pyrrolo[1,2,3-*de*]quinoxalin-2-yl)methyl)phenyl)ethan-1-one 2g**

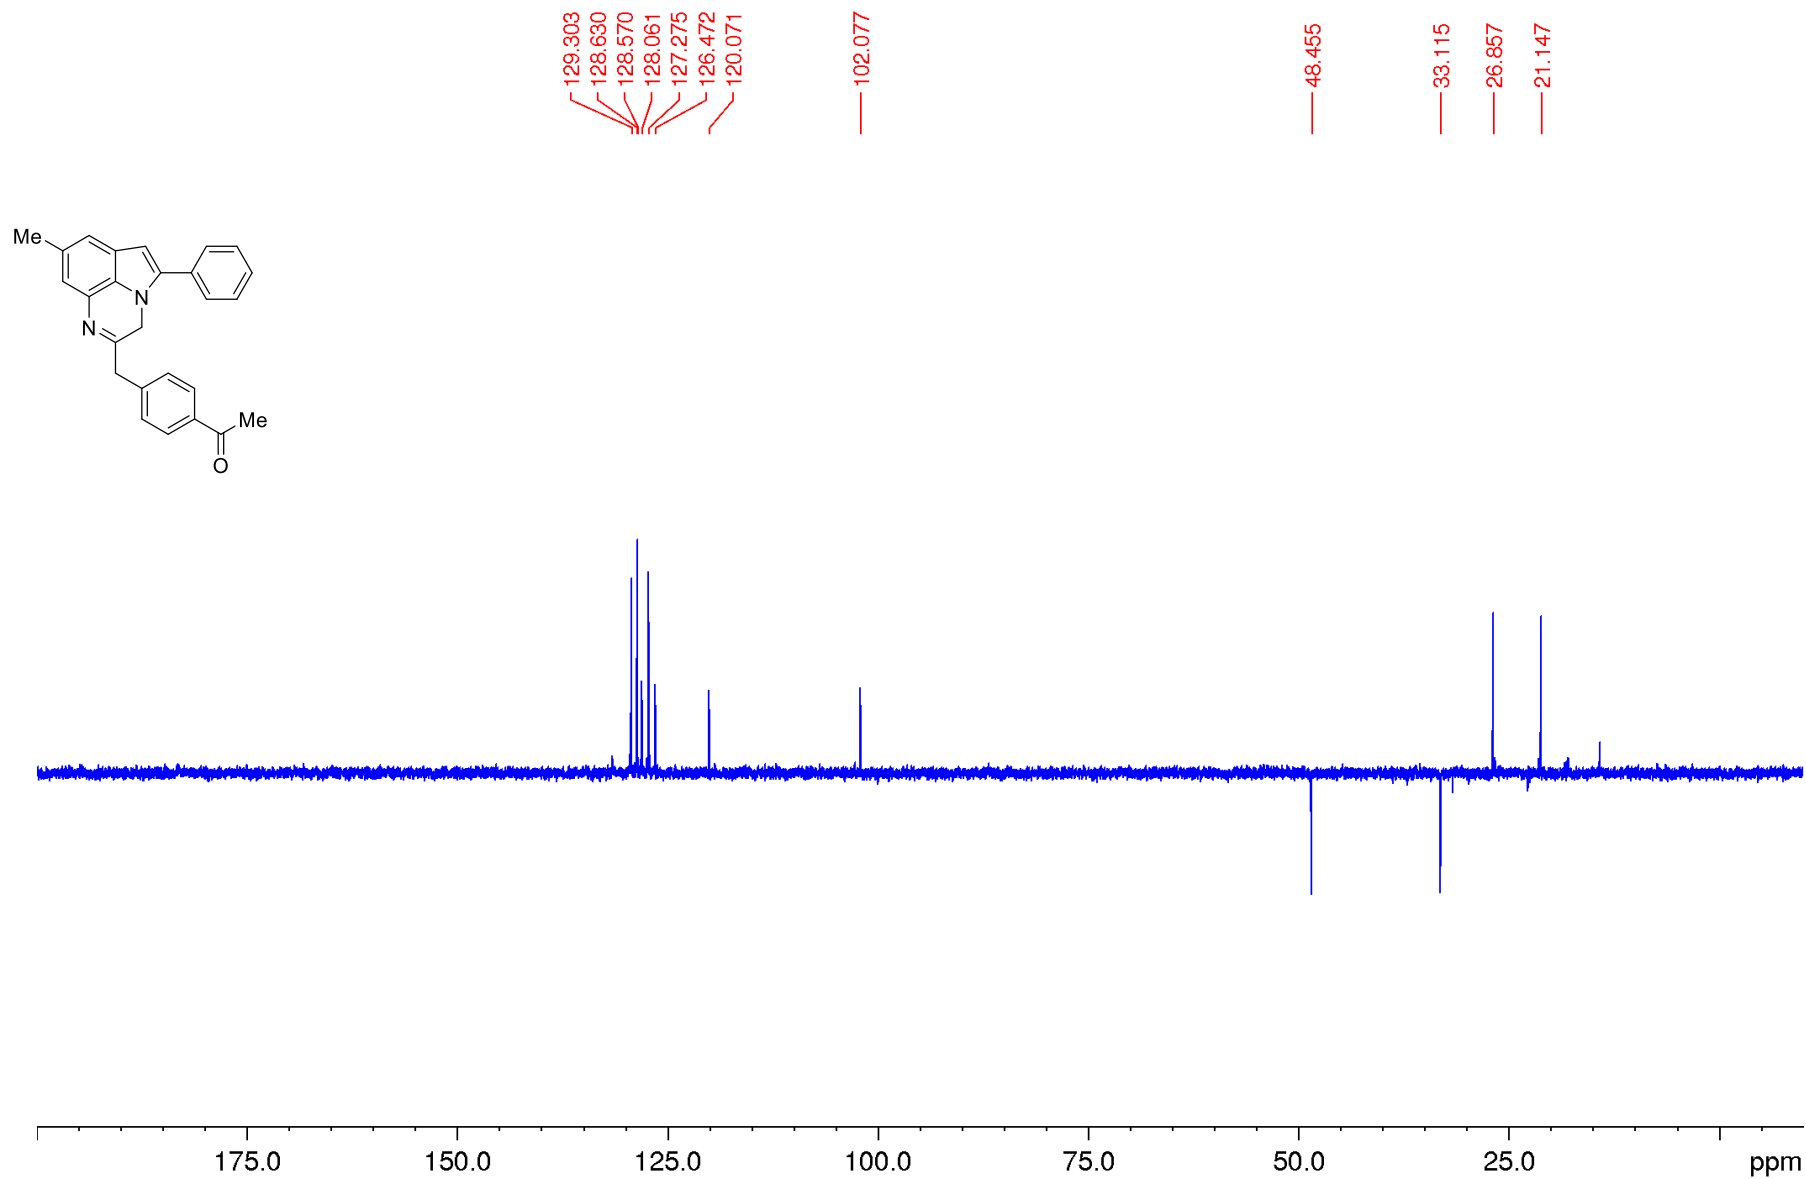

**methyl 4-(2-(4-chlorobenzyl)-8-methyl-3H-pyrrolo[1,2,3-*de*]quinoxalin-5-yl)benzoate 2h**

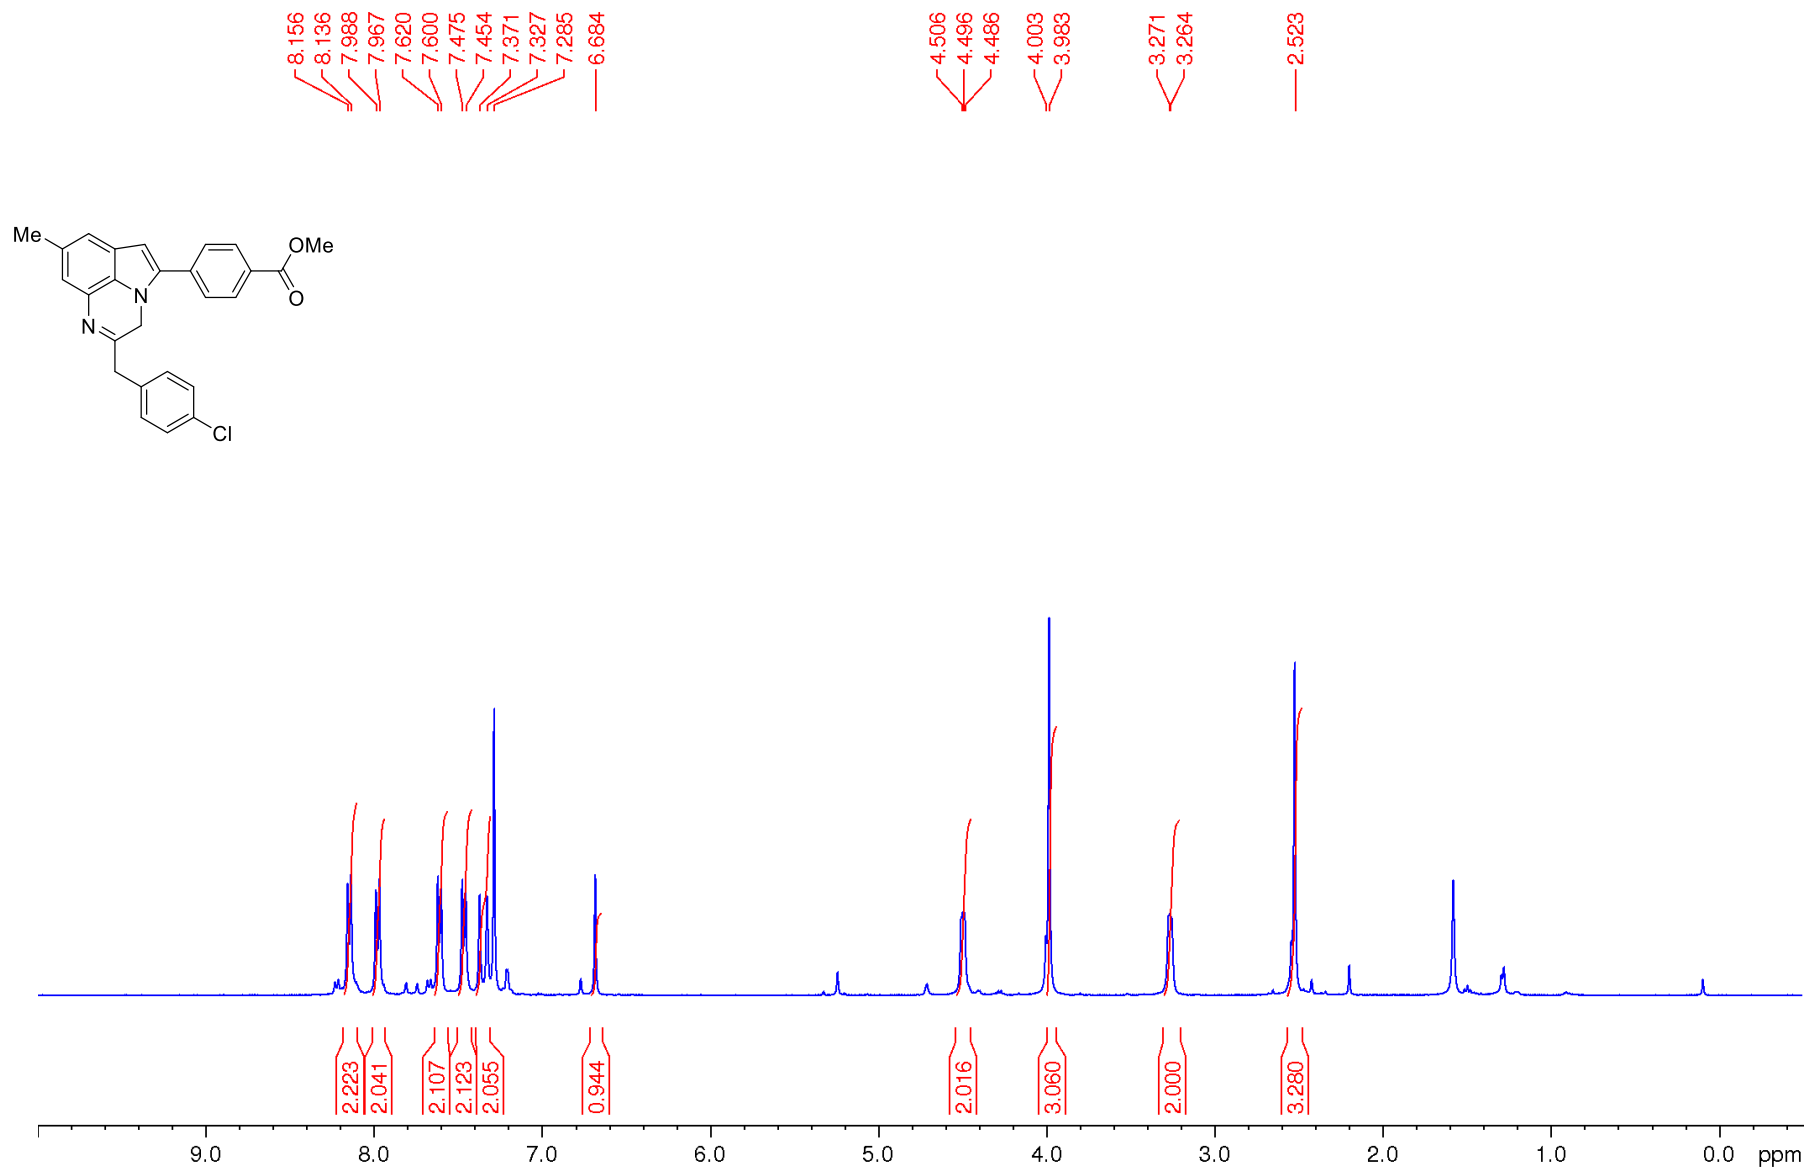

**methyl 4-(2-(4-chlorobenzyl)-8-methyl-3H-pyrrolo[1,2,3-*de*]quinoxalin-5-yl)benzoate 2h**

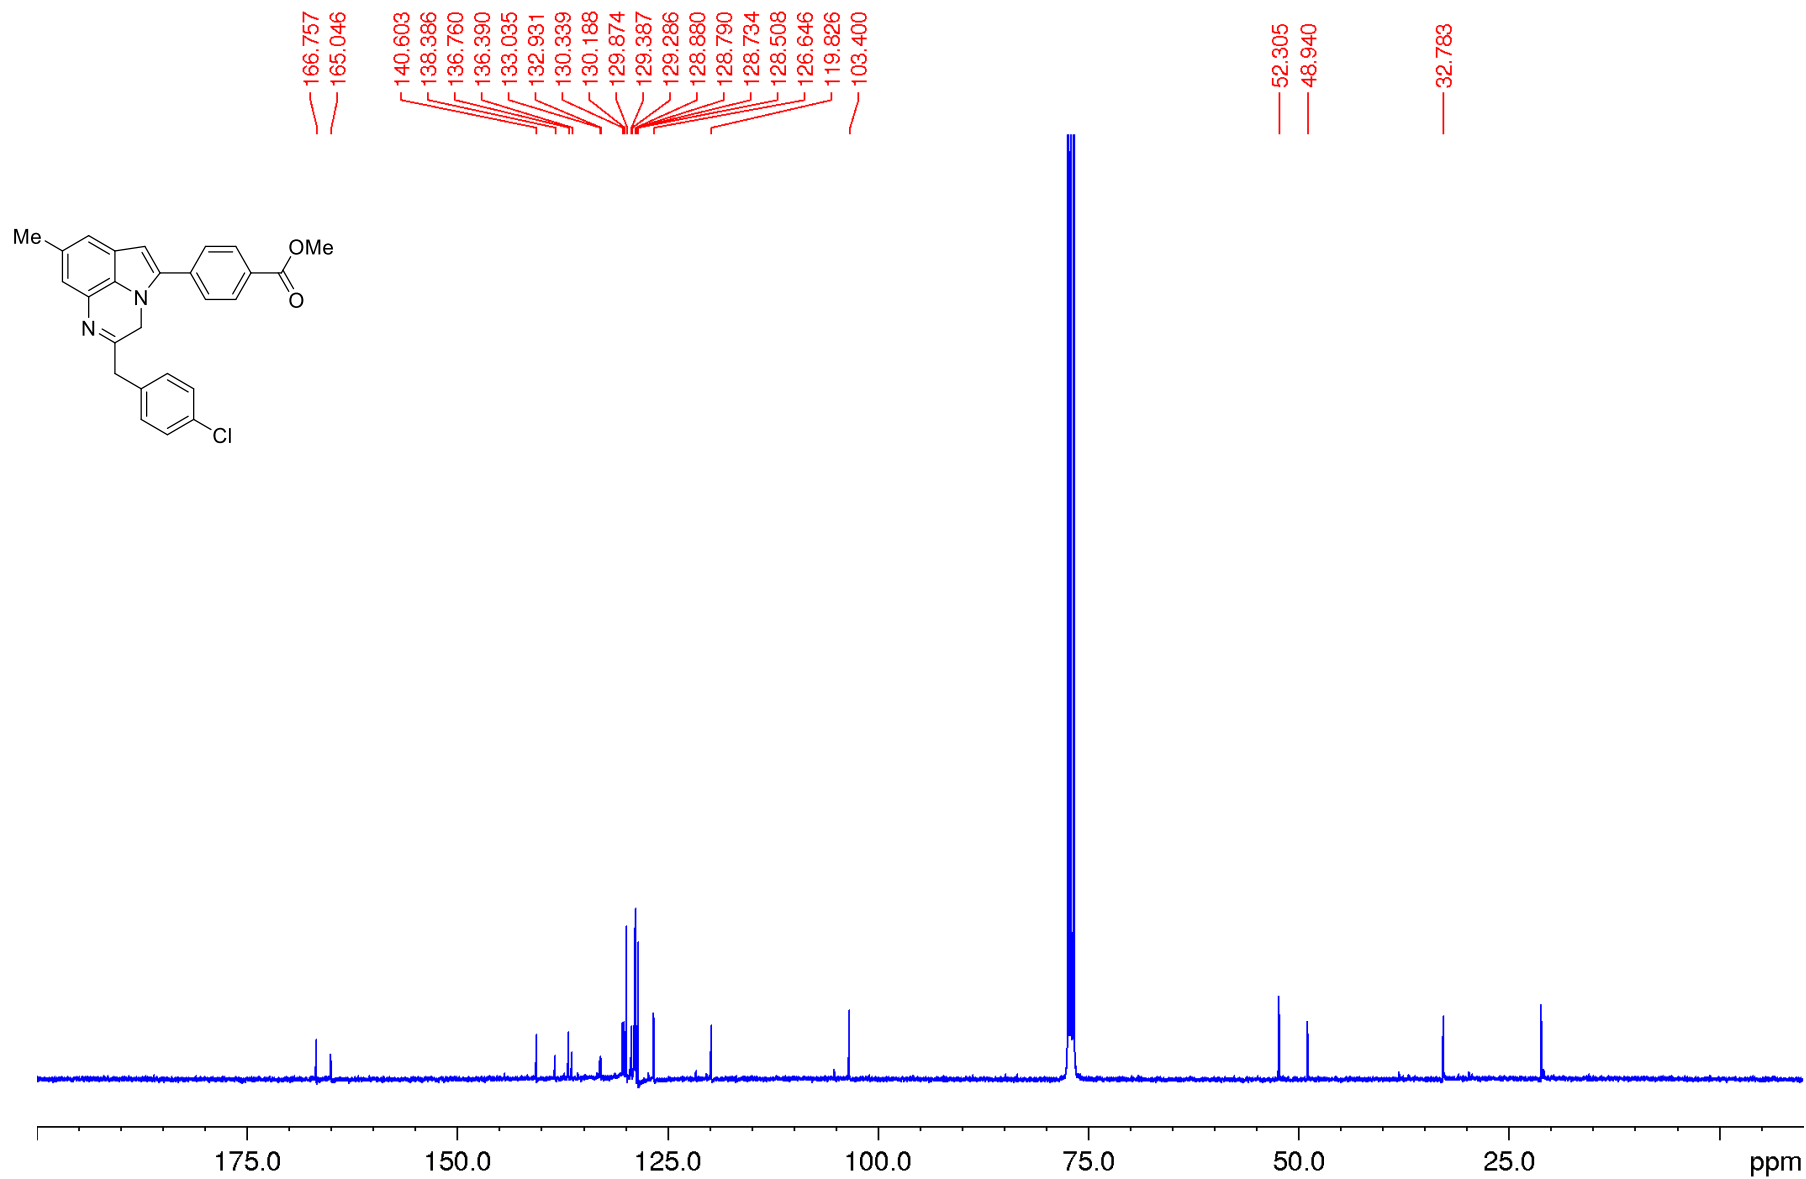

**methyl 4-(2-(4-chlorobenzyl)-8-methyl-3*H*-pyrrolo[1,2,3-*de*]quinoxalin-5-yl)benzoate 2h**

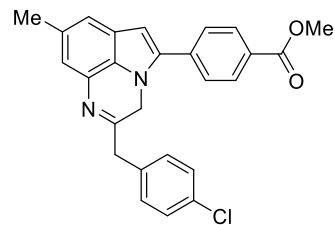

129.871  
128.878  
128.789  
128.506  
126.641

103.400

52.304

48.941

32.785

21.132

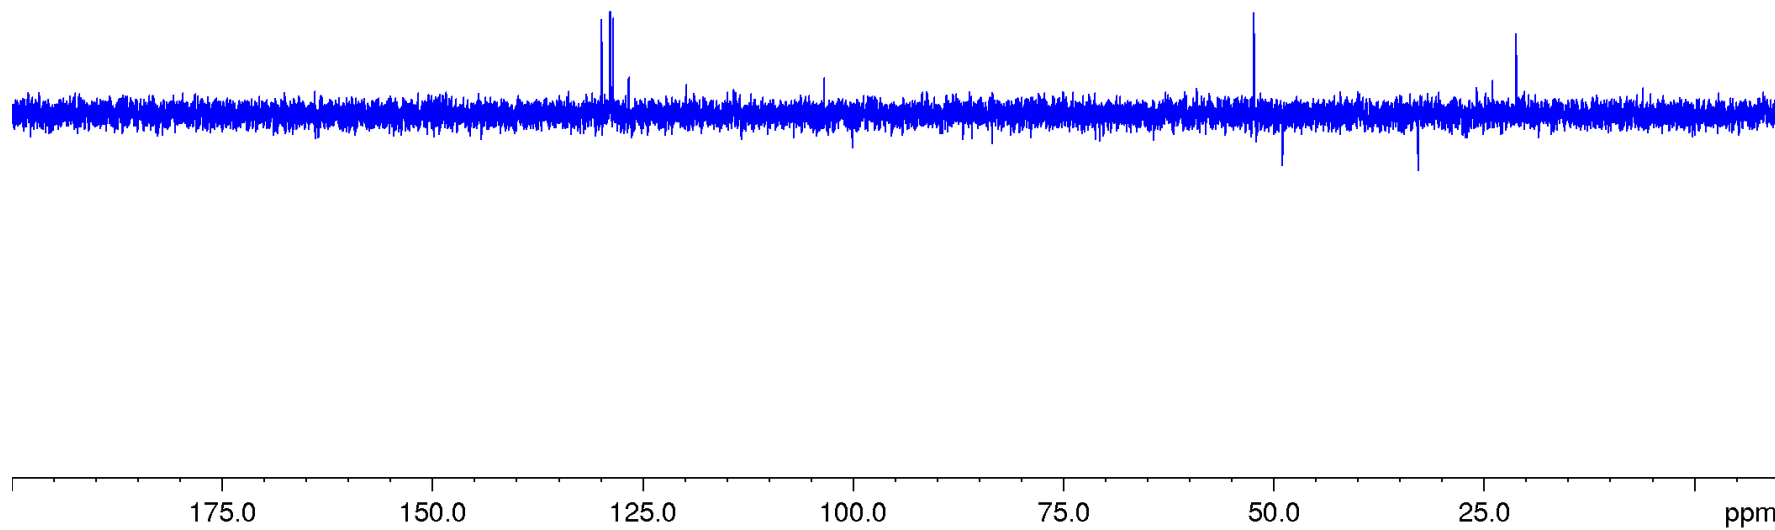

# 2-(4-chlorobenzyl)-8-methyl-5-phenyl-3H-pyrrolo[1,2,3-*de*]quinoxaline 2i

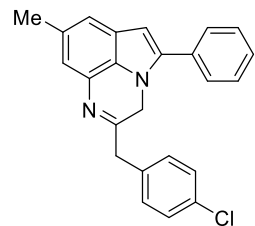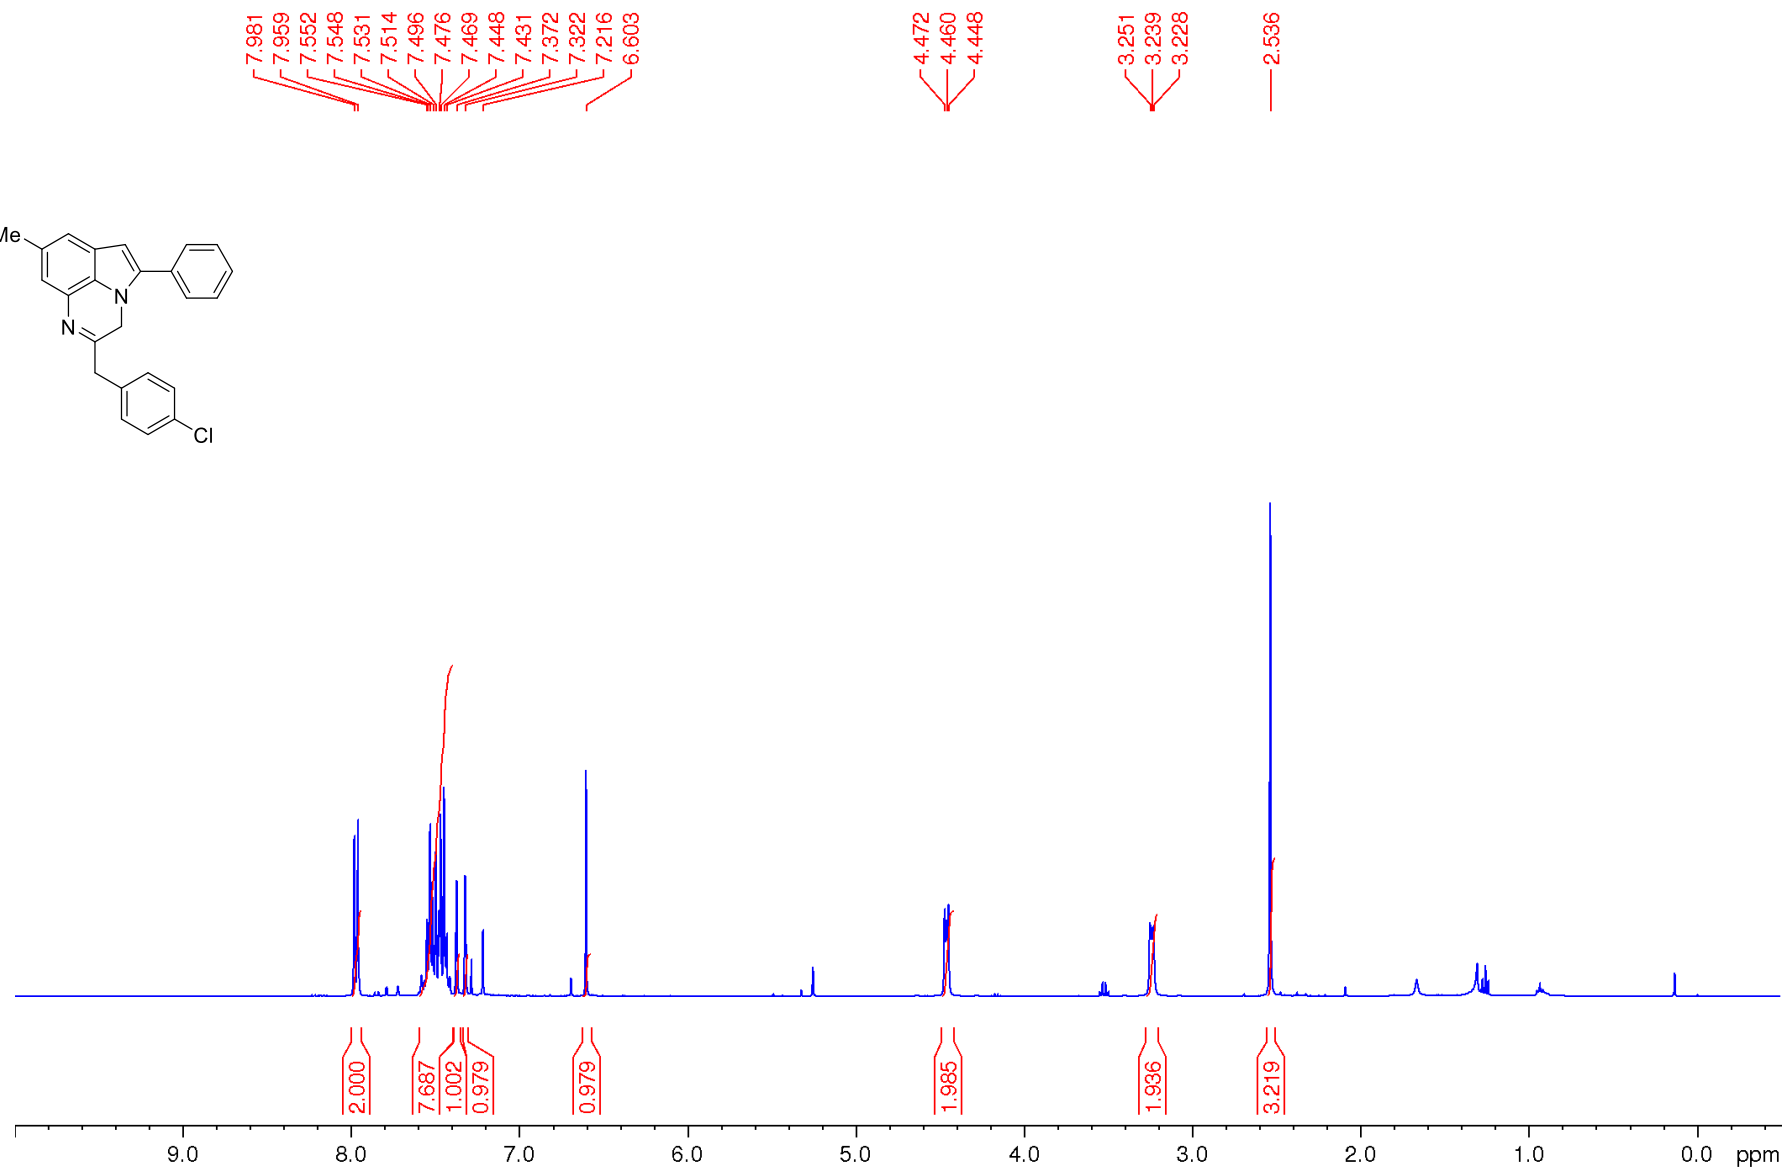



## 2-(4-chlorobenzyl)-8-methyl-5-phenyl-3*H*-pyrrolo[1,2,3-*de*]quinoxaline 2i

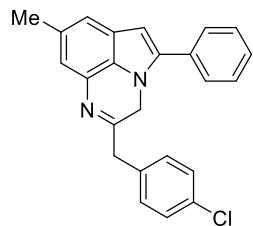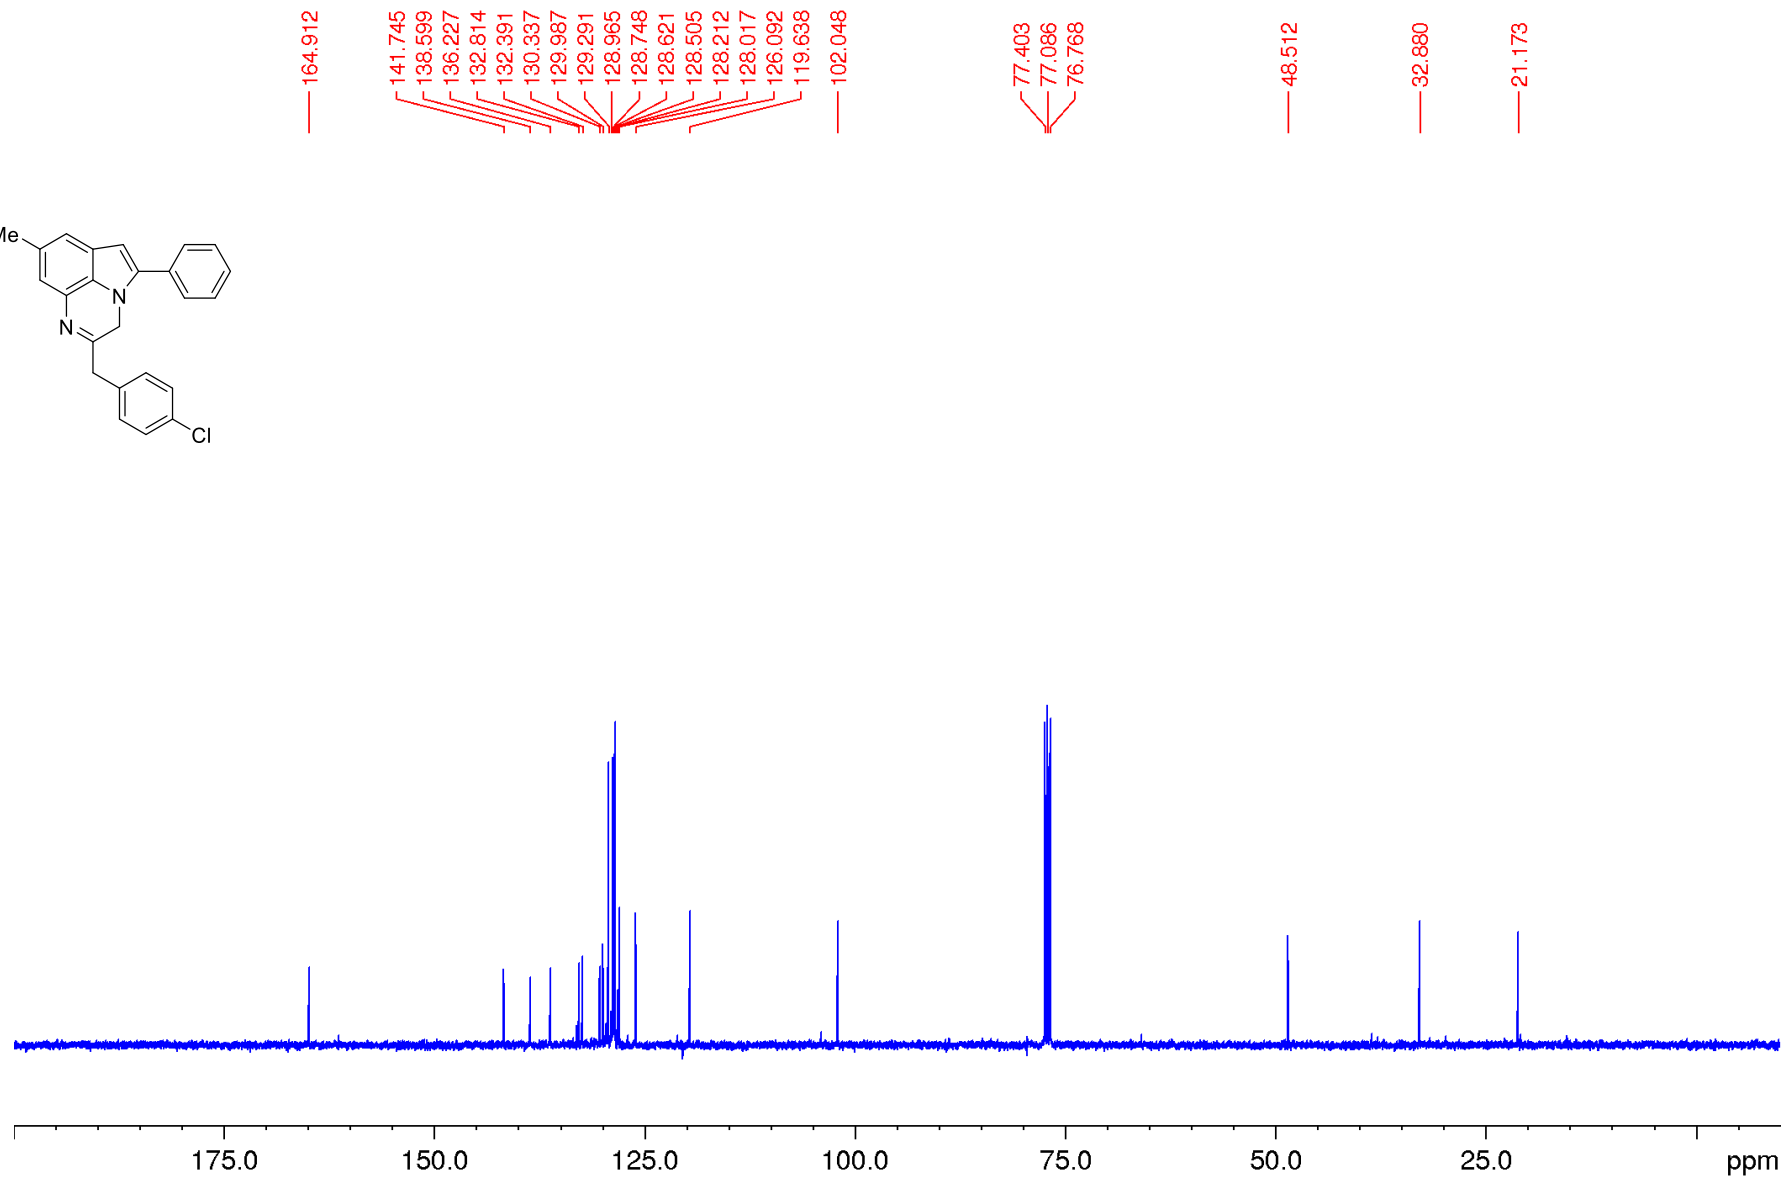

**2-(4-chlorobenzyl)-8-methyl-5-phenyl-3*H*-pyrrolo[1,2,3-*de*]quinoxaline 2i**



129.291  
128.747  
128.621  
128.505  
128.017  
126.091  
119.638  
102.047

48.513

32.880

21.175

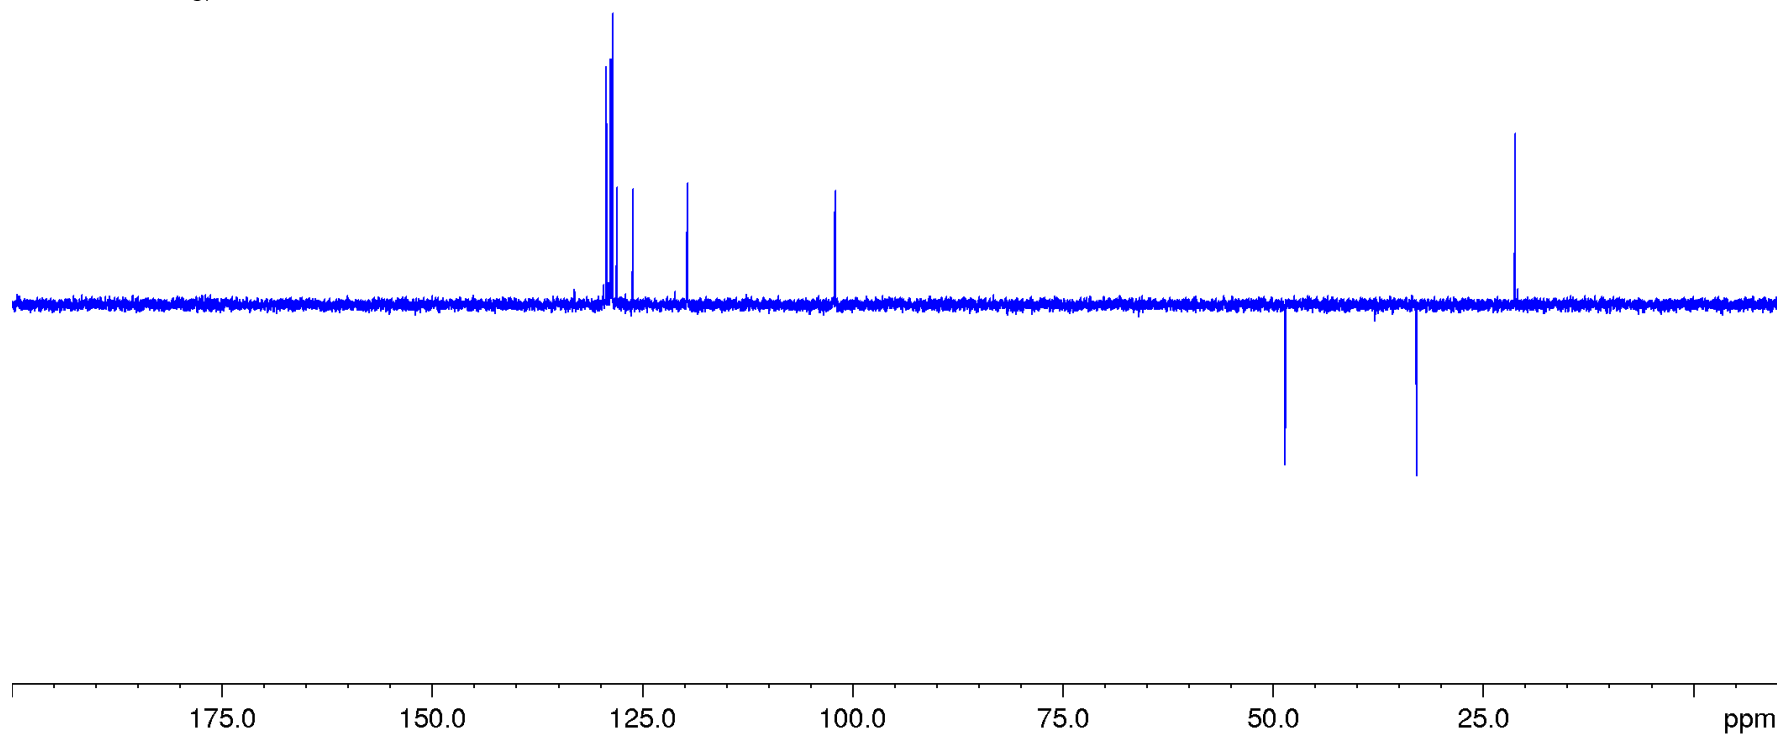

1-((4-((6-(4-methoxyphenyl)-8-methyl-5-phenyl-3H-pyrrolo[1,2,3-de]quinoxalin-2-yl)methyl)phenyl)ethan-1-one 2k

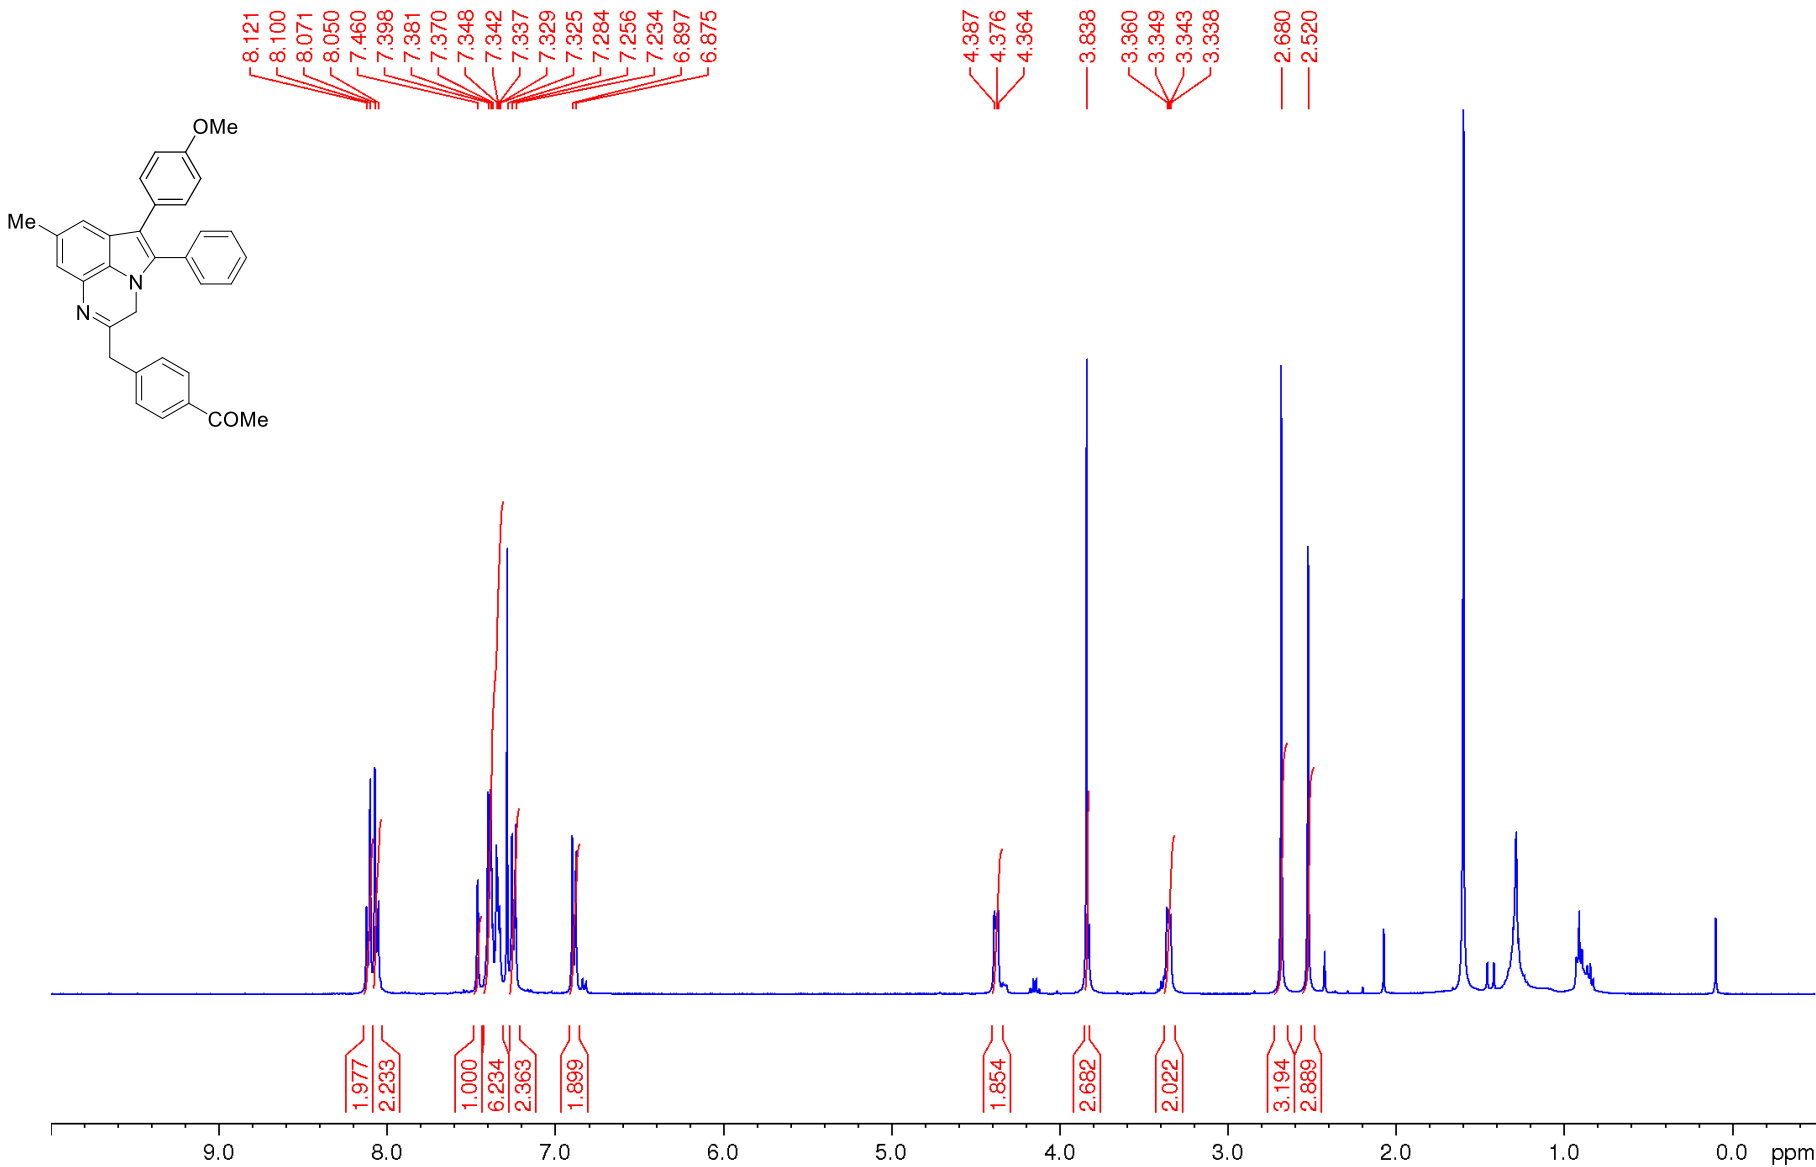

1-(4-((6-(4-methoxyphenyl)-8-methyl-5-phenyl-3H-pyrrolo[1,2,3-de]quinoxalin-2-yl)methyl)phenyl)ethan-1-one 2k

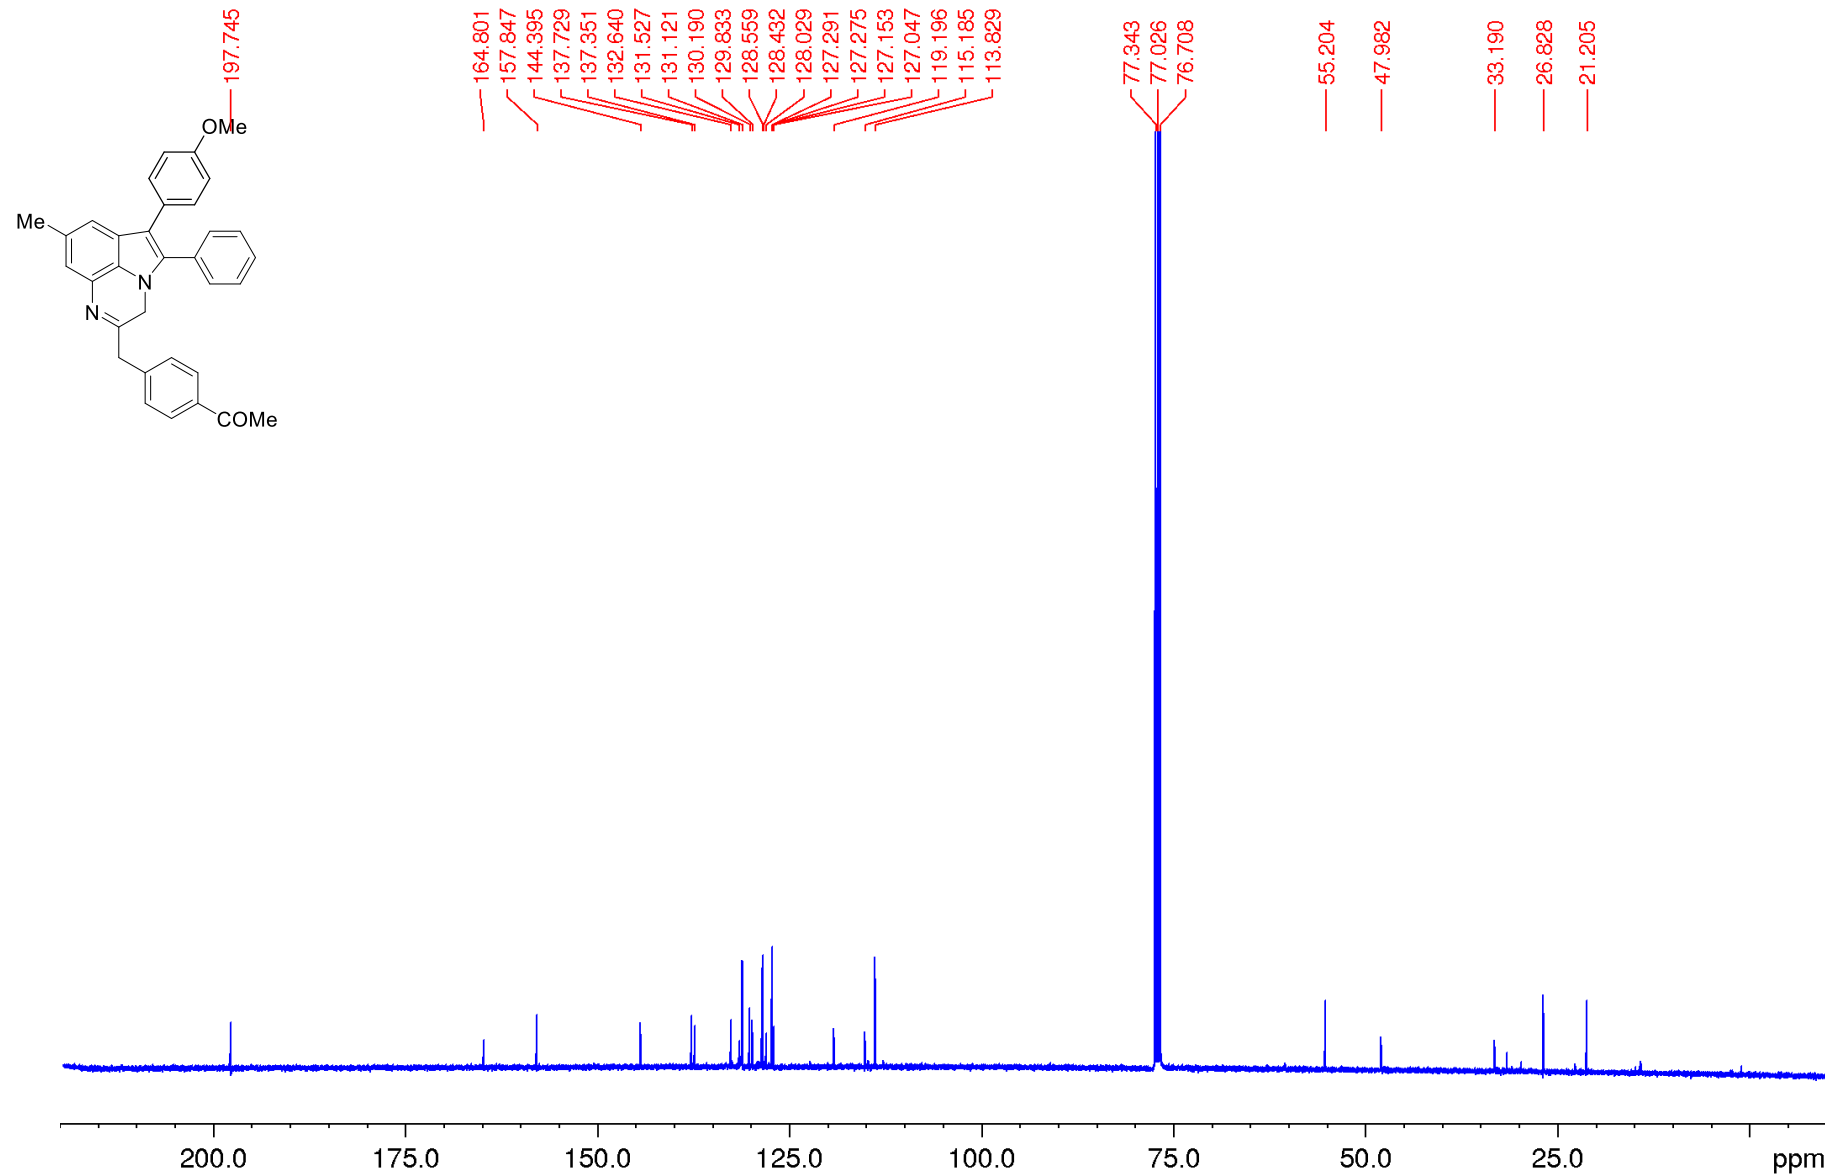

1-((4-((6-(4-methoxyphenyl)-8-methyl-5-phenyl-3H-pyrrolo[1,2,3-de]quinoxalin-2-yl)methyl)phenyl)ethan-1-one 2k

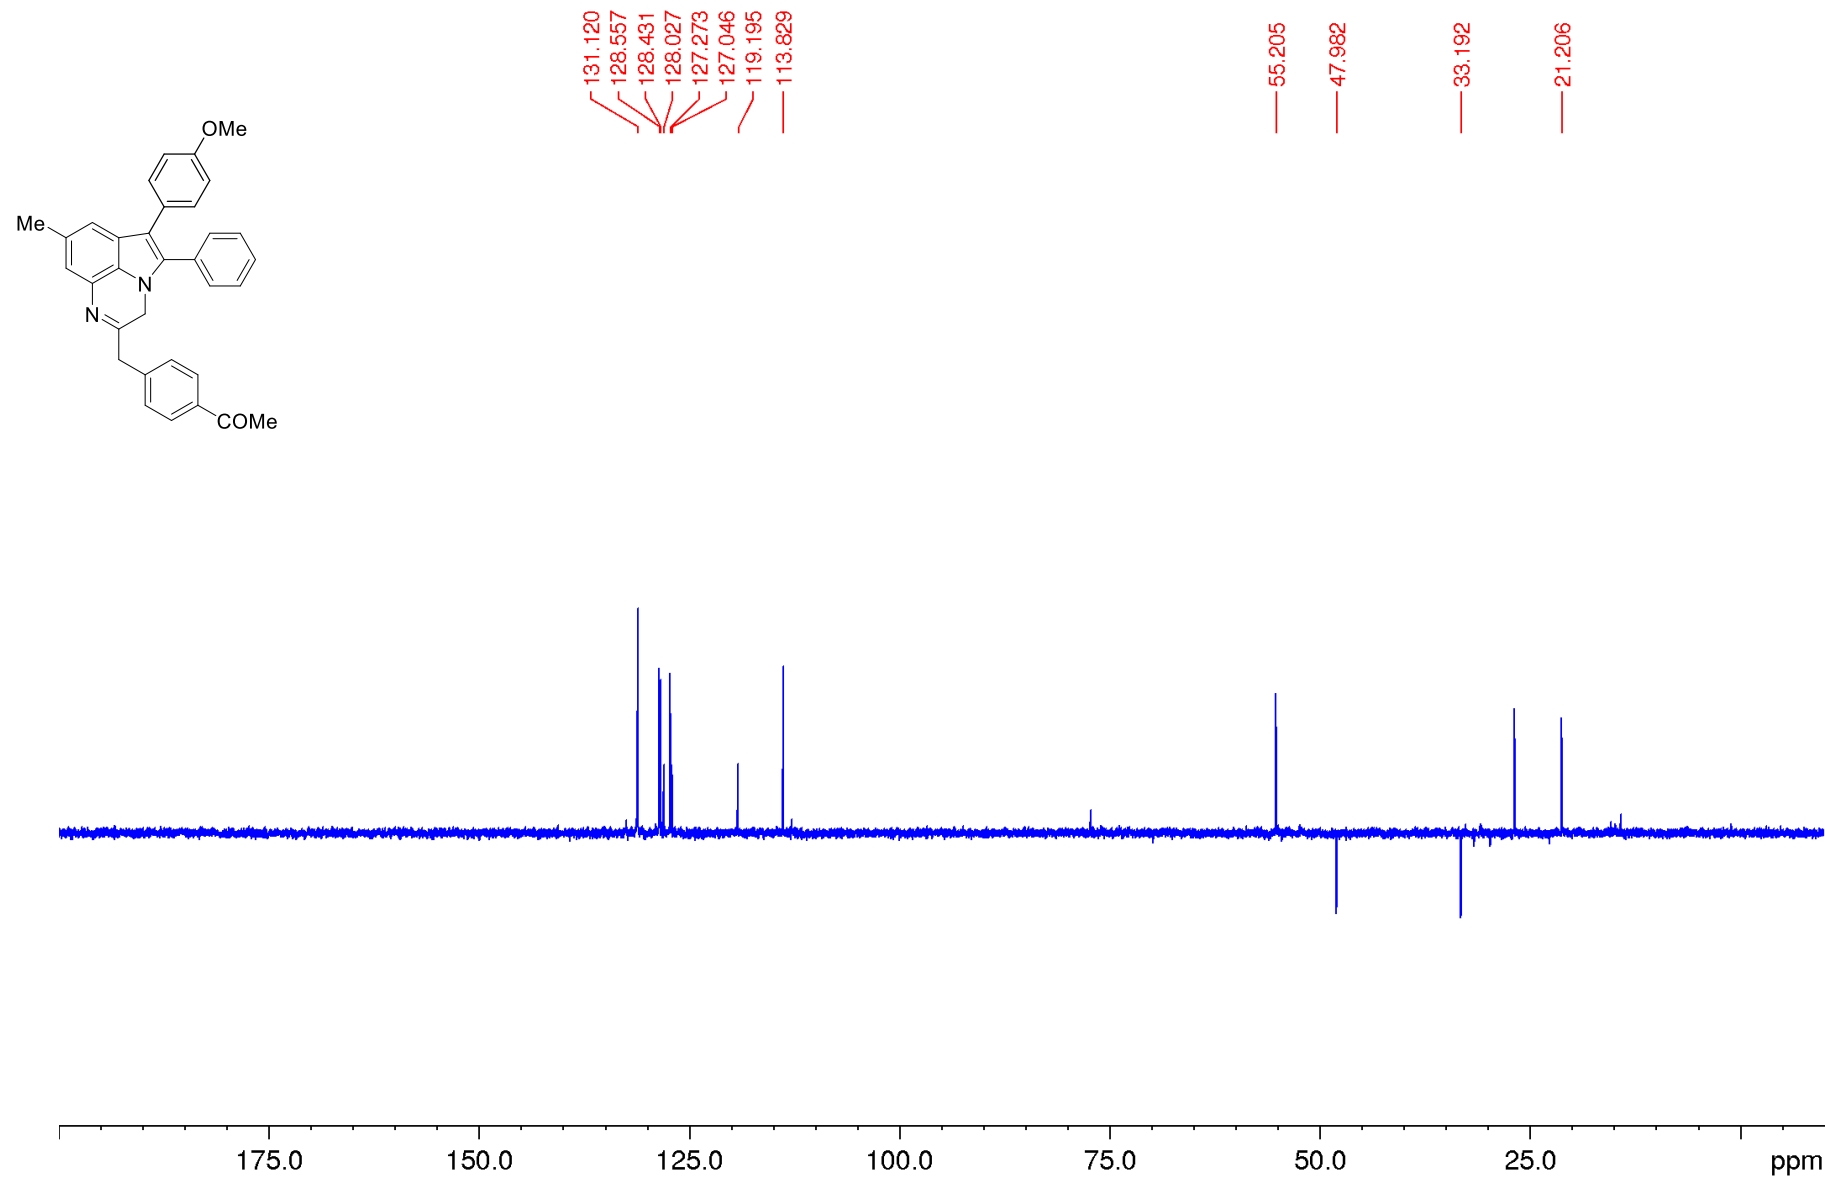

**8-chloro-2-(4-methoxybenzyl)-5-phenyl-2,3-dihydro-1H-pyrrolo[1,2,3-de]quinoxaline 9d**

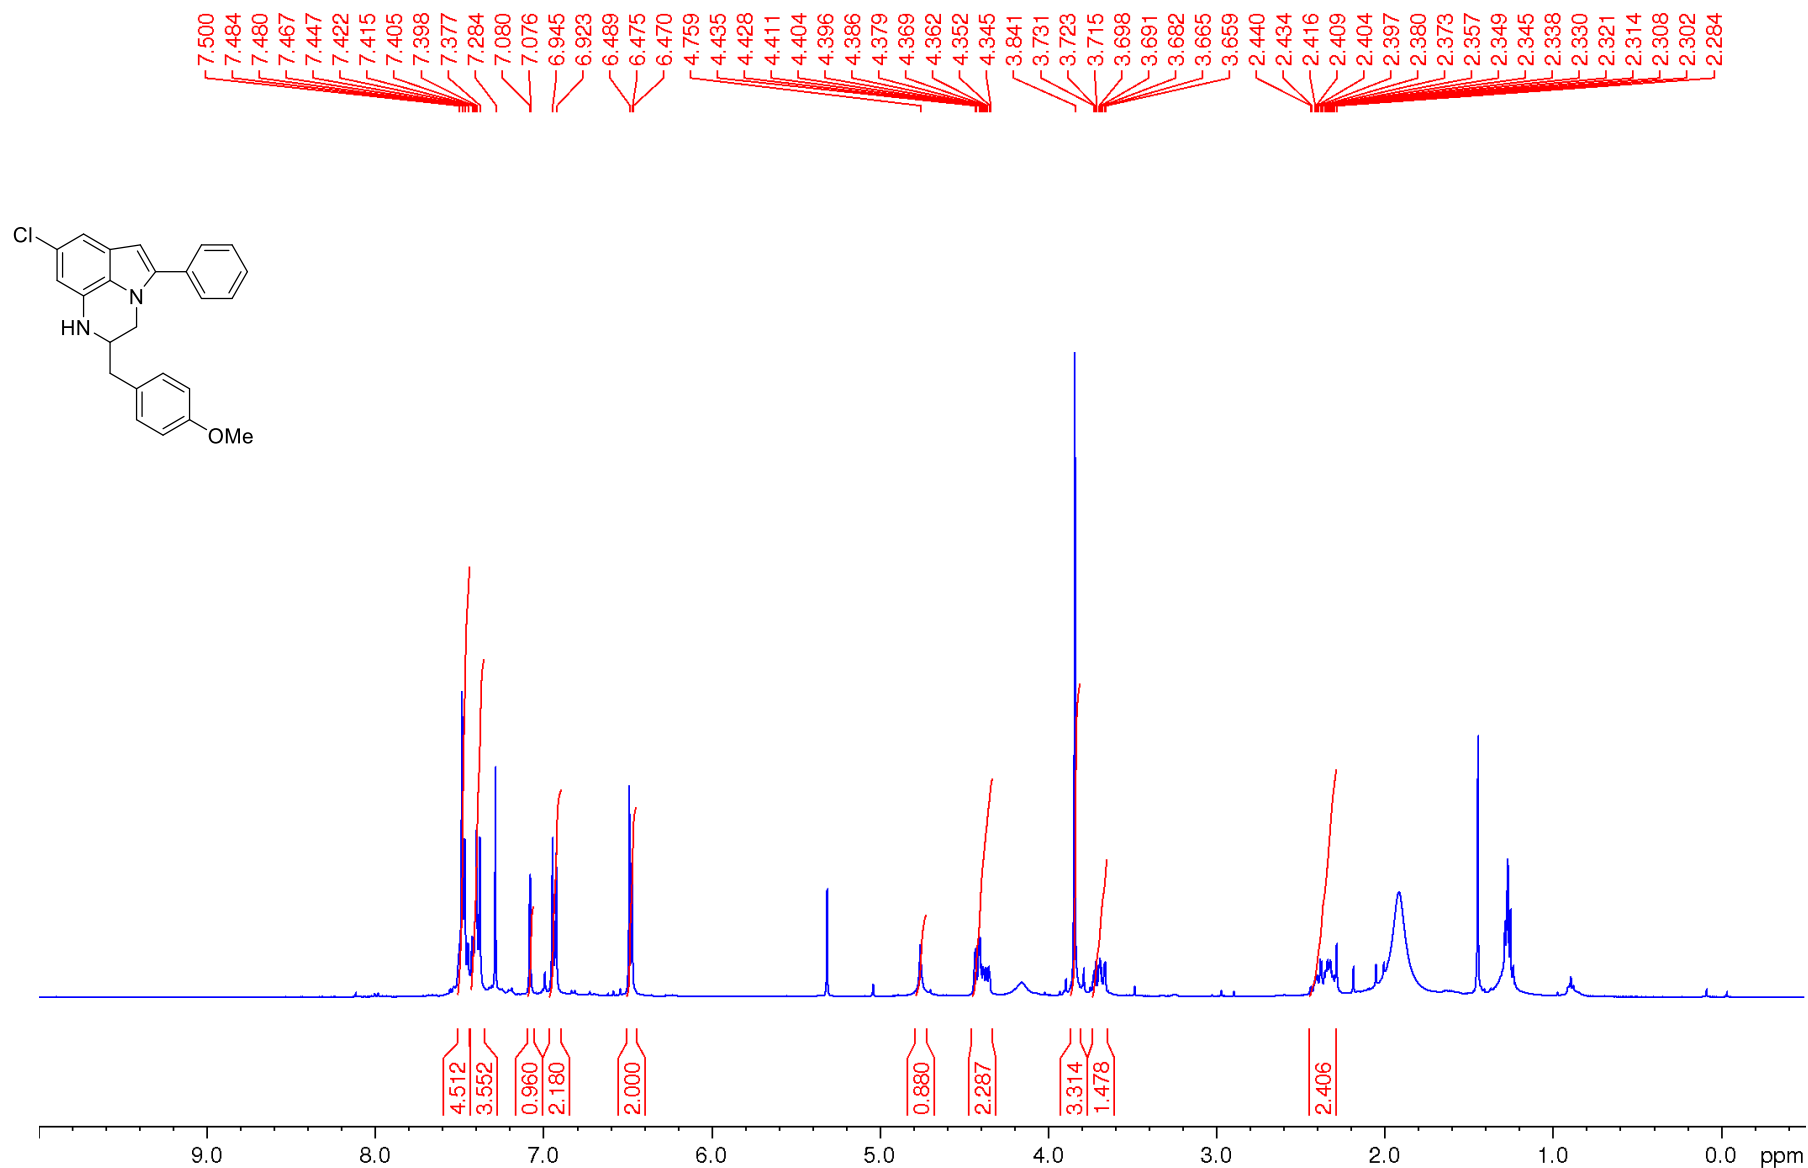

**8-chloro-2-(4-methoxybenzyl)-5-phenyl-2,3-dihydro-1H-pyrrolo[1,2,3-*de*]quinoxaline 9d**

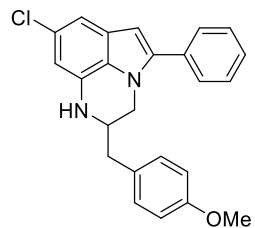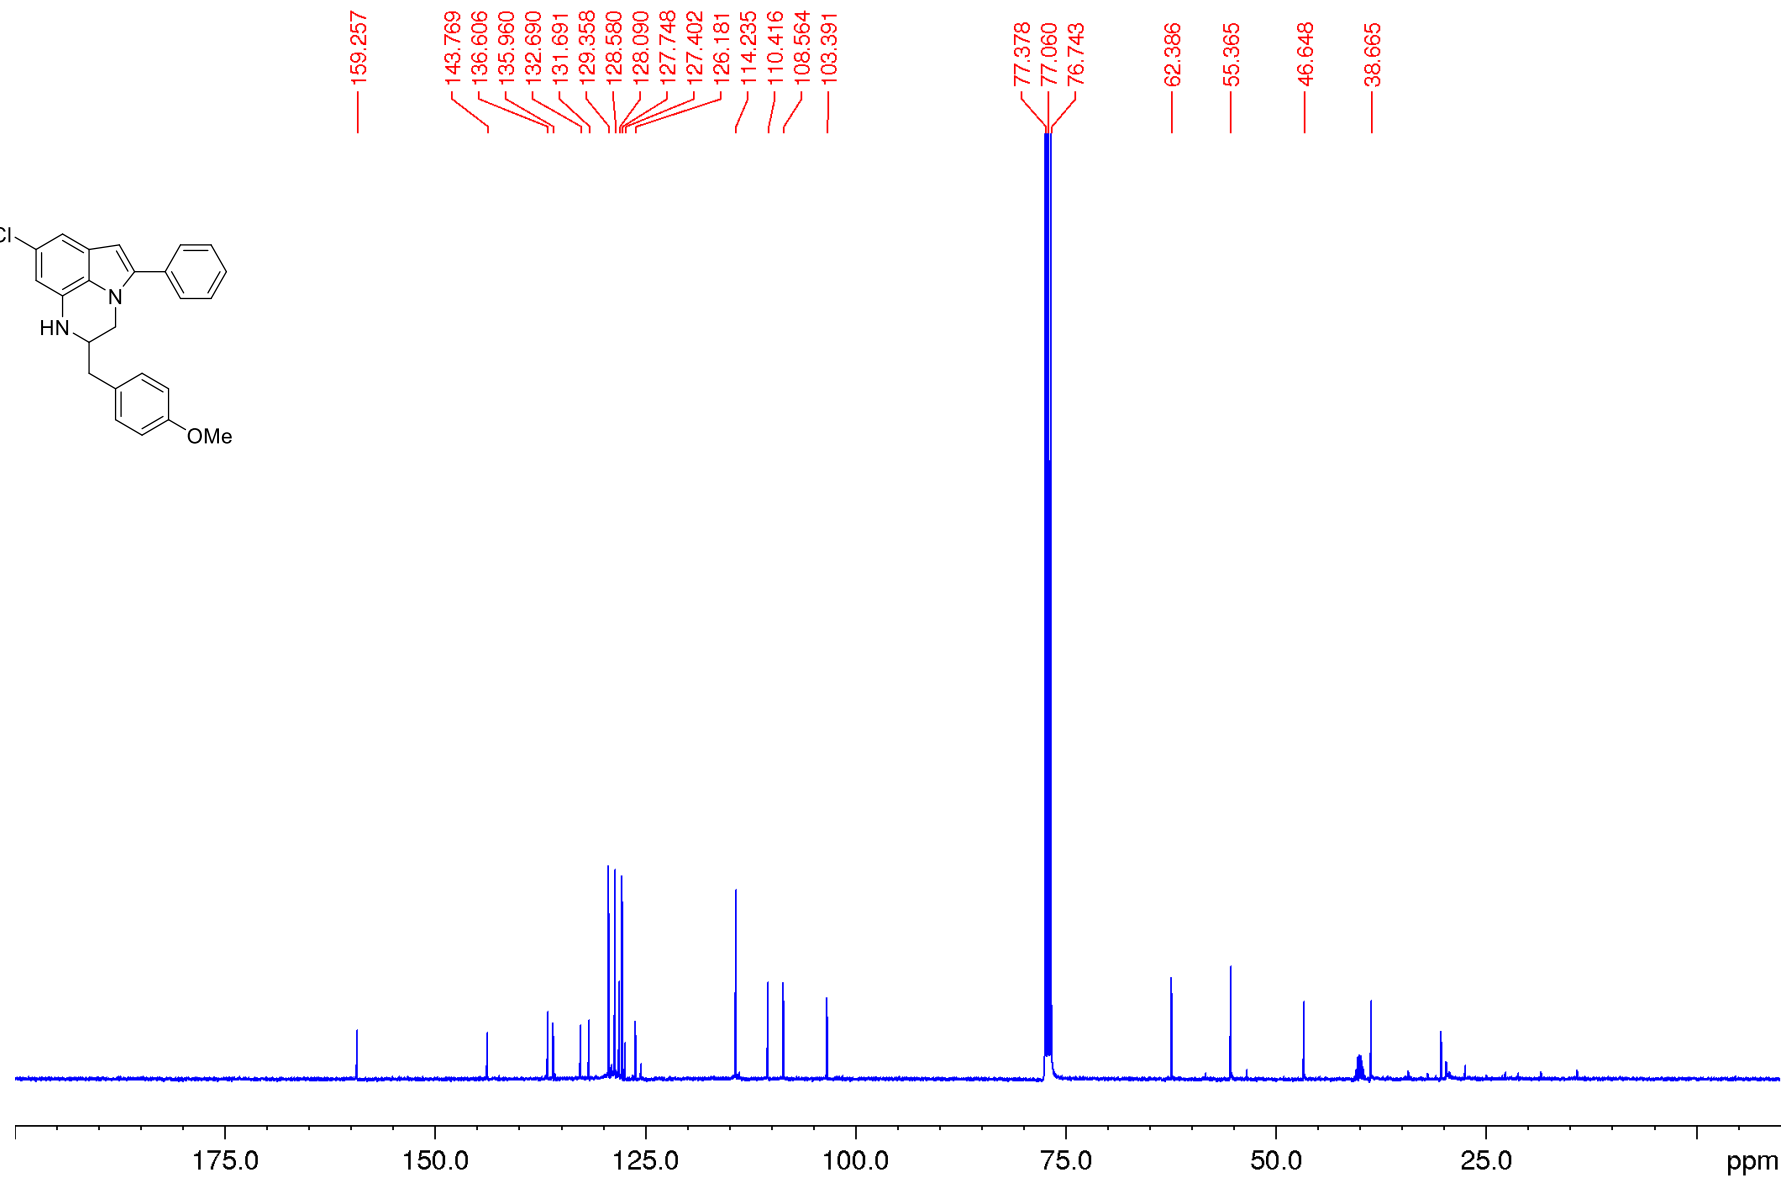

**8-chloro-2-(4-methoxybenzyl)-5-phenyl-2,3-dihydro-1H-pyrrolo[1,2,3-*de*]quinoxaline 9d**

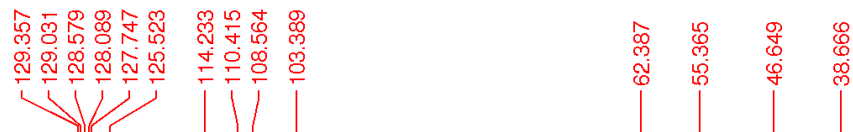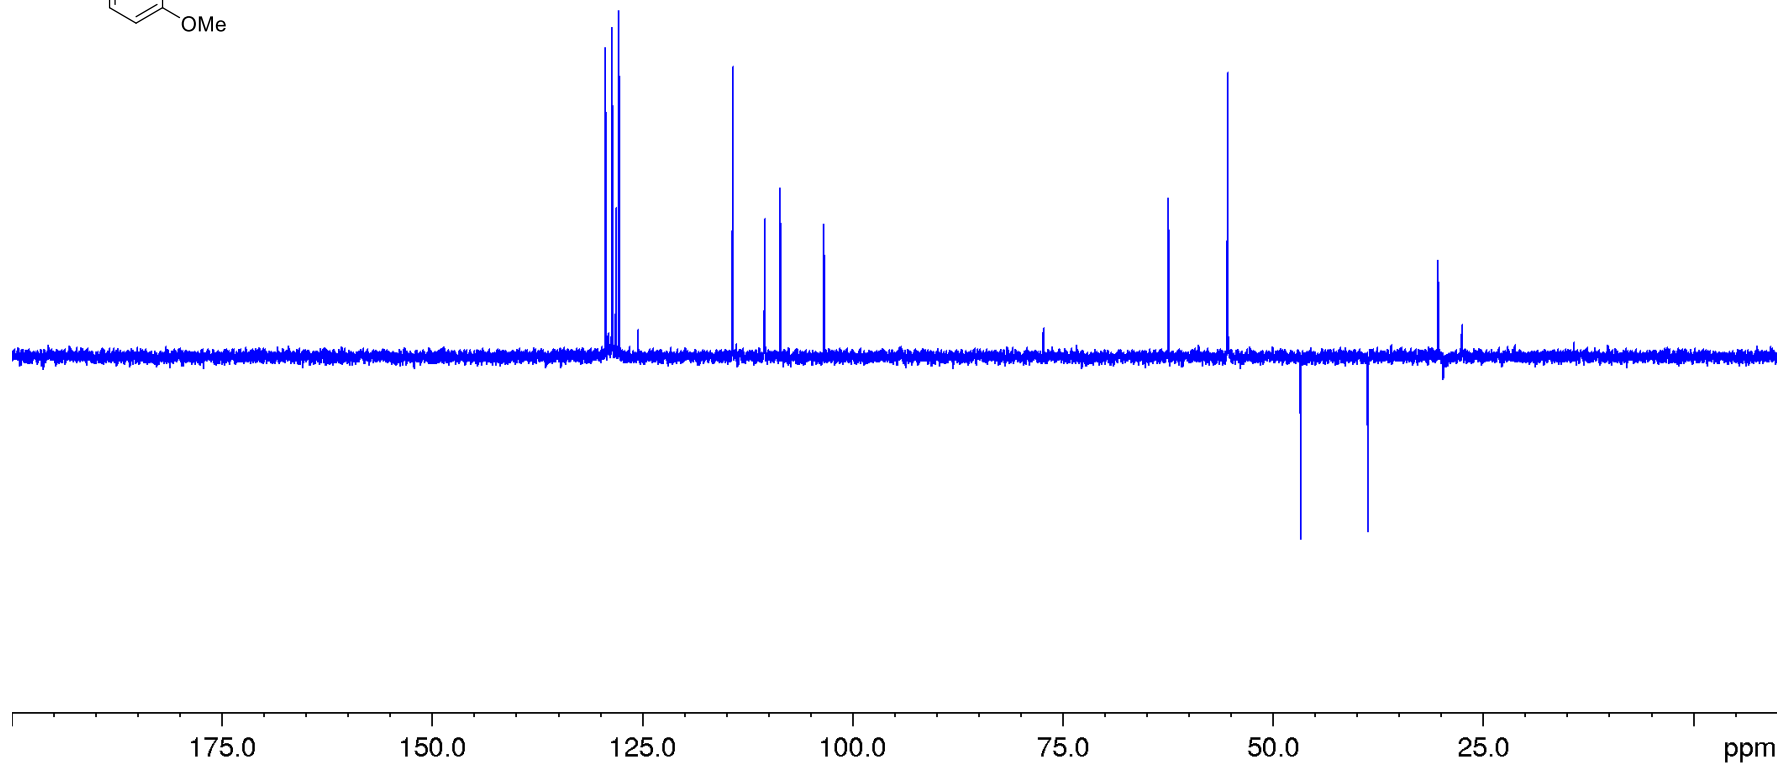





5-chloro-7-nitro-2-phenyl-1H-indole 5a

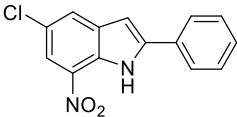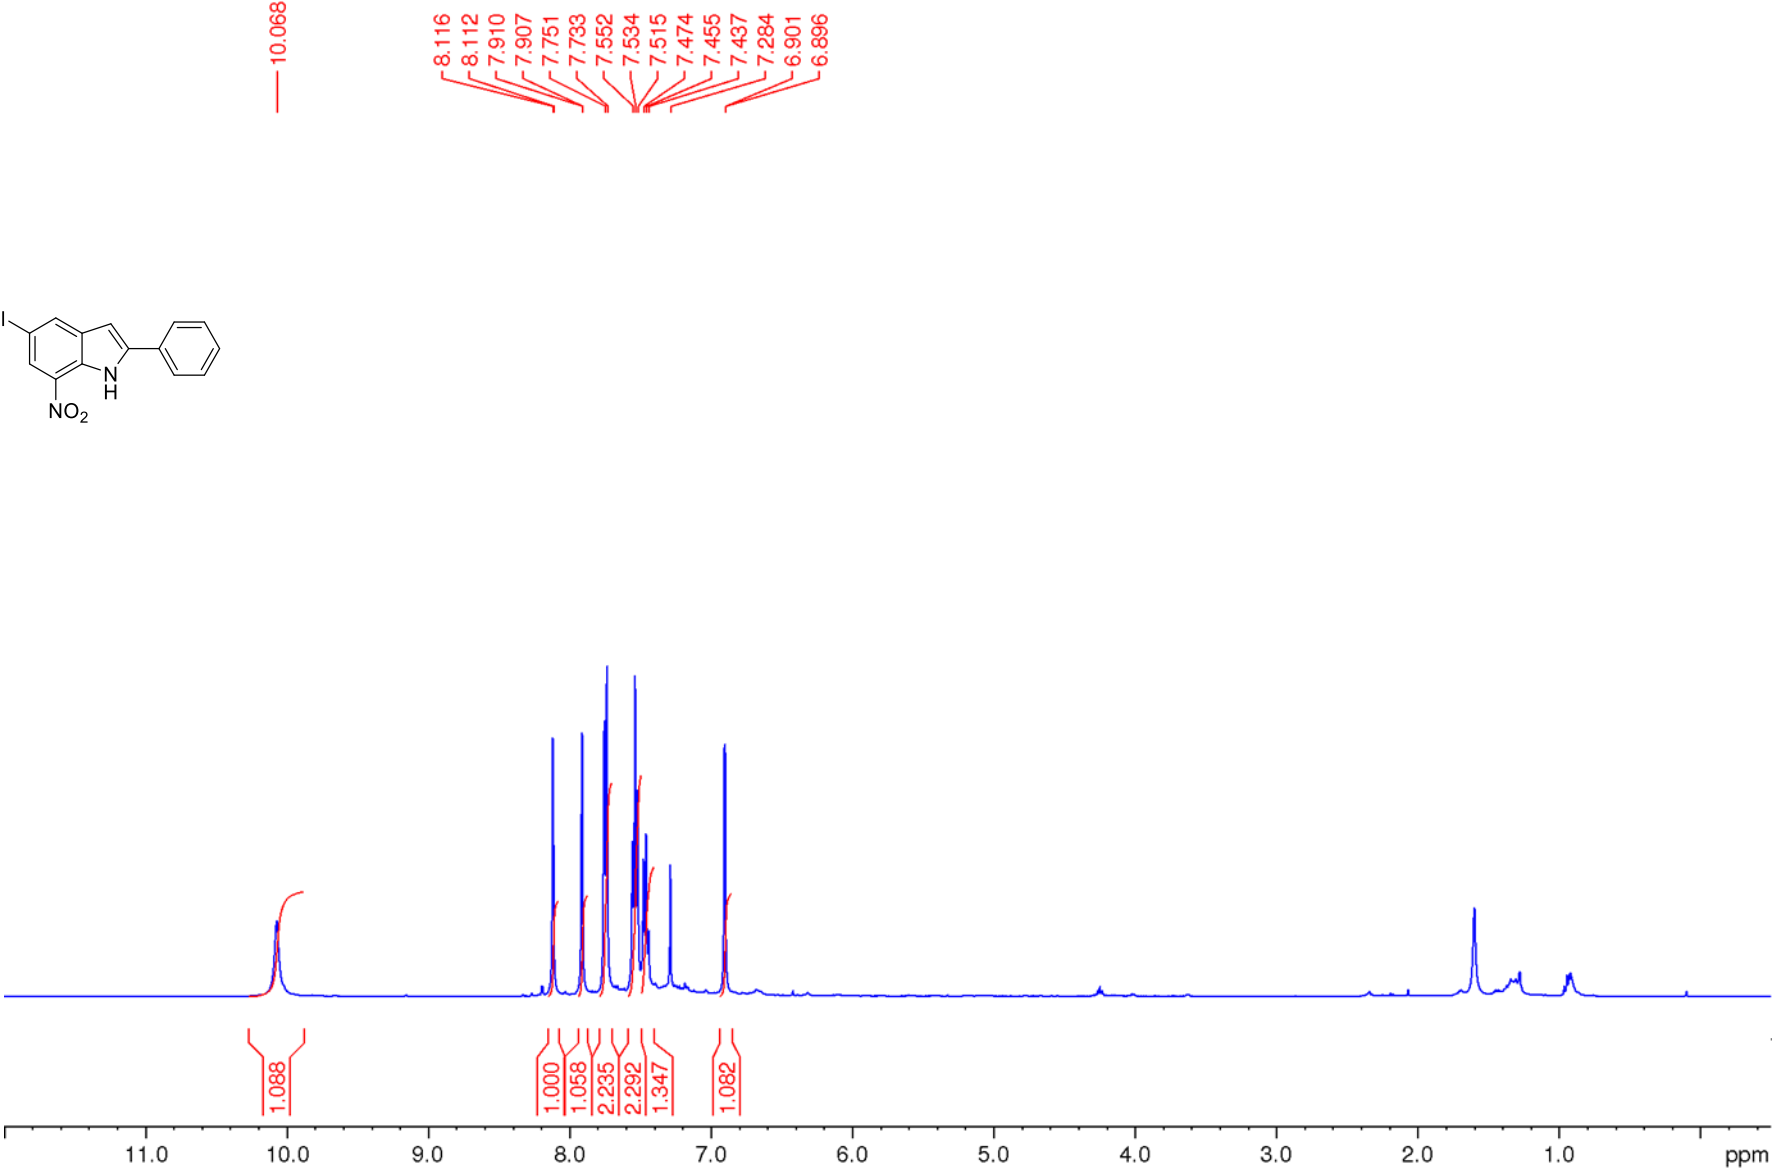

5-chloro-7-nitro-2-phenyl-1*H*-indole 5a

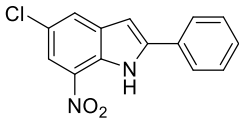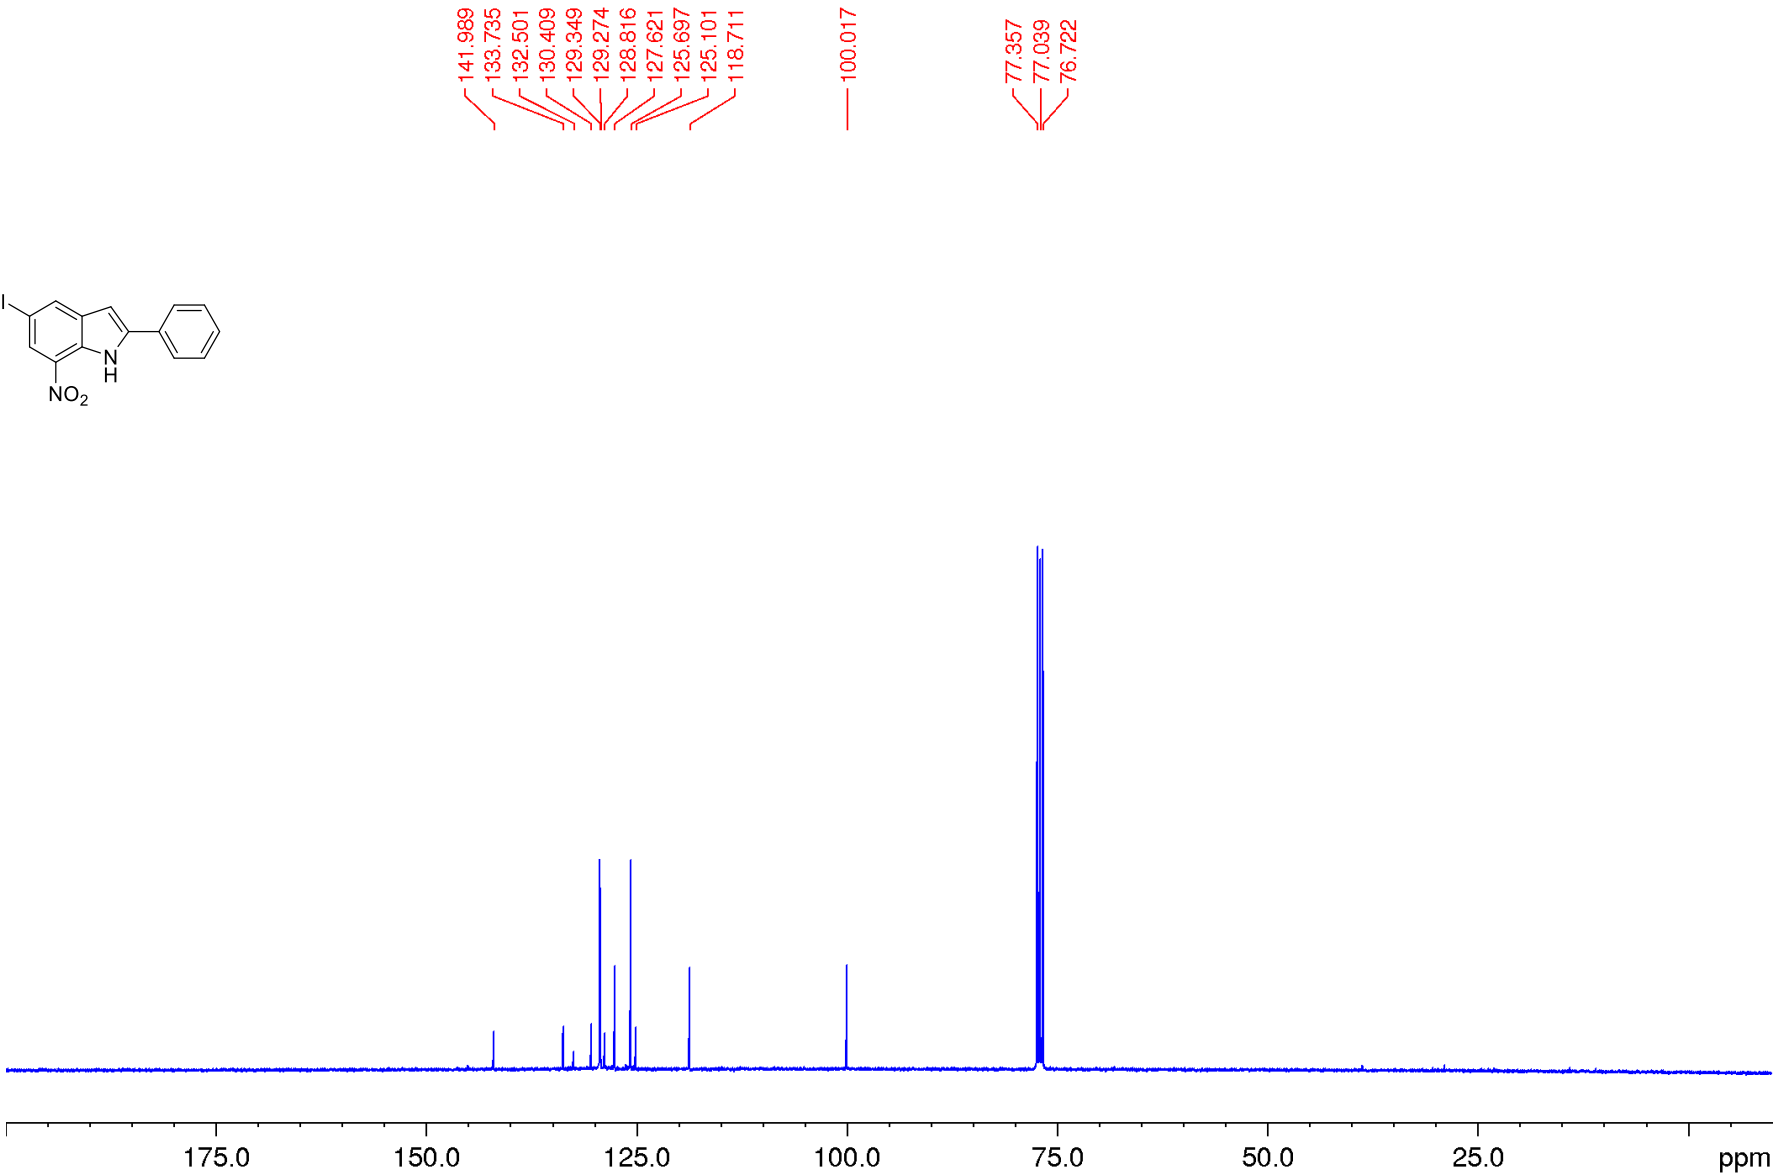

5-chloro-7-nitro-2-phenyl-1H-indole 5a

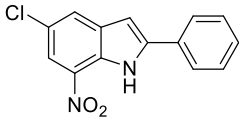

129.349  
129.273  
127.621  
125.696  
118.710  
100.016

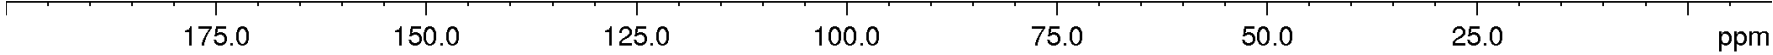

# 5-chloro-2-(4-methoxyphenyl)-7-nitro-1H-indole 5b

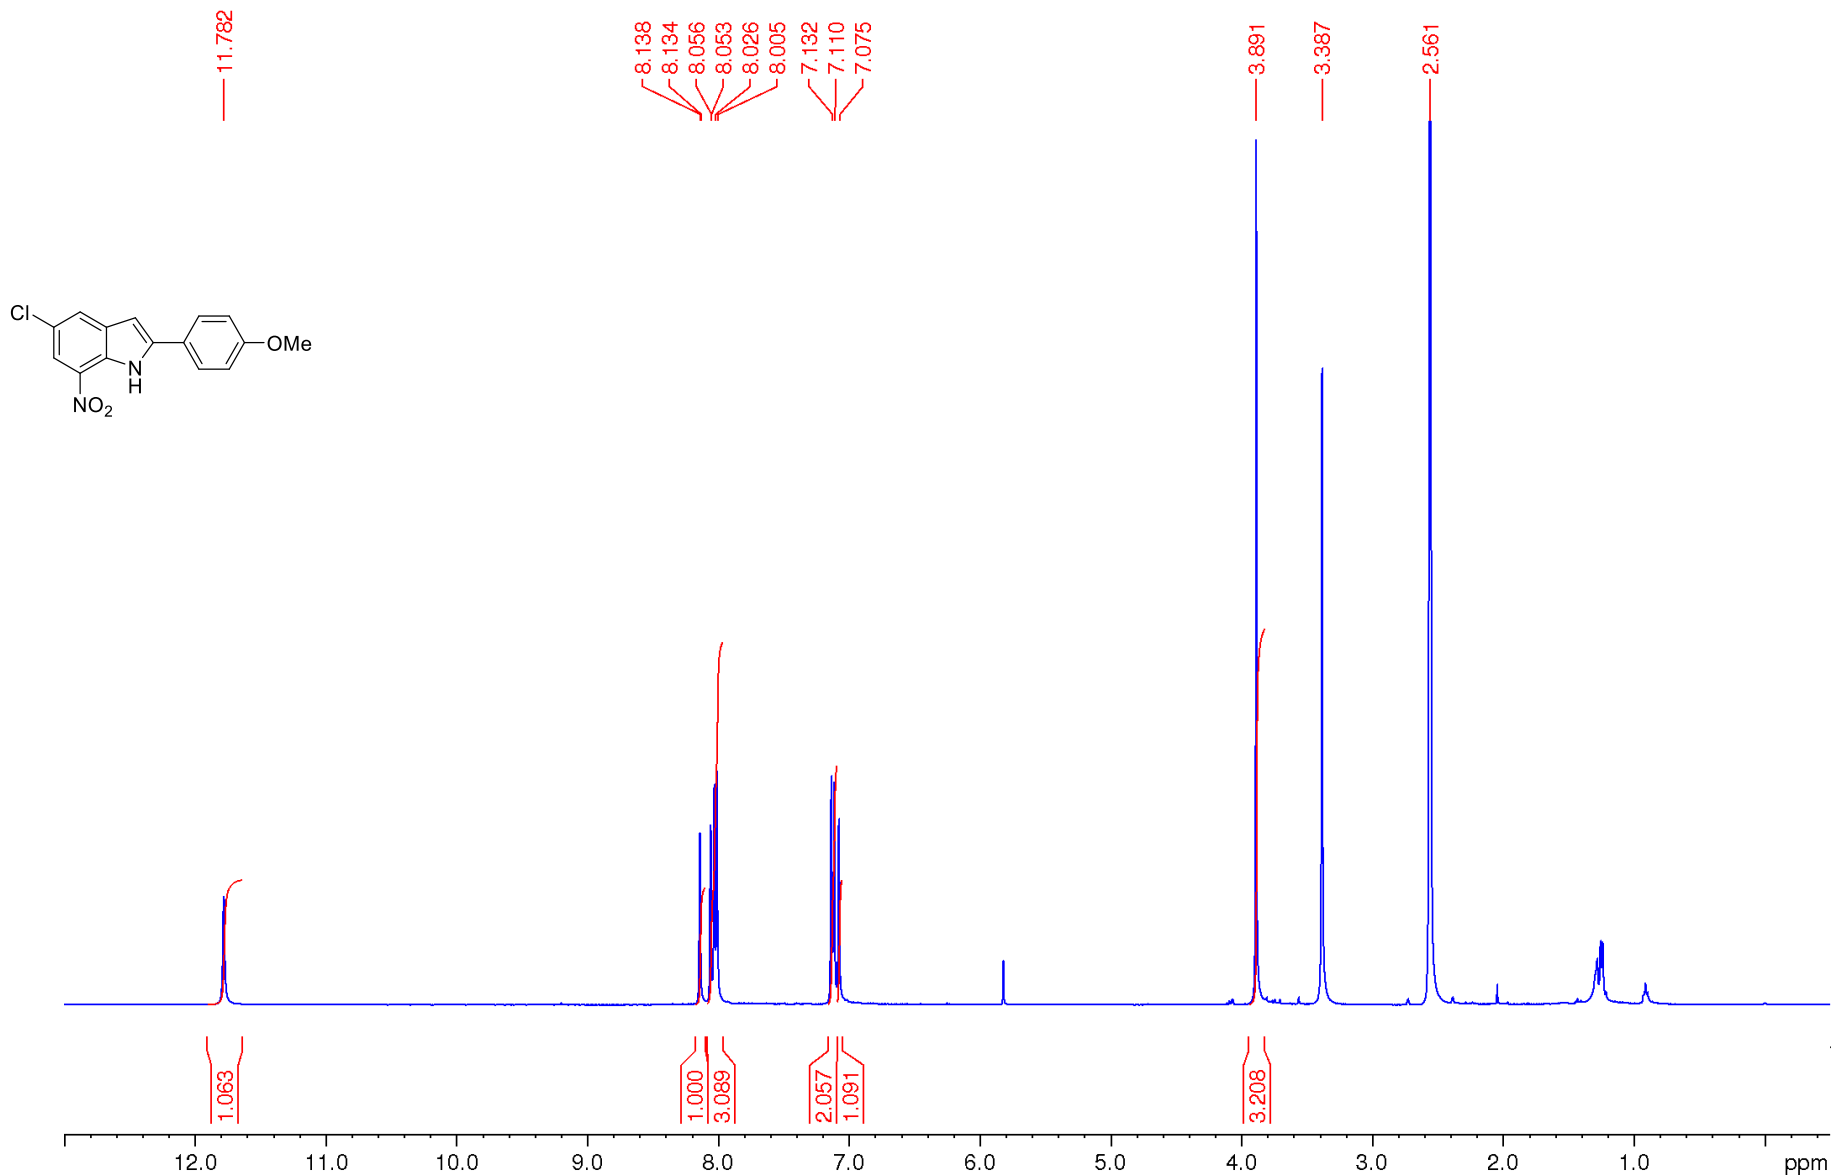

5-chloro-2-(4-methoxyphenyl)-7-nitro-1H-indole 5b

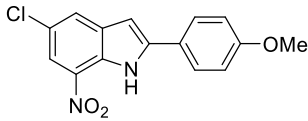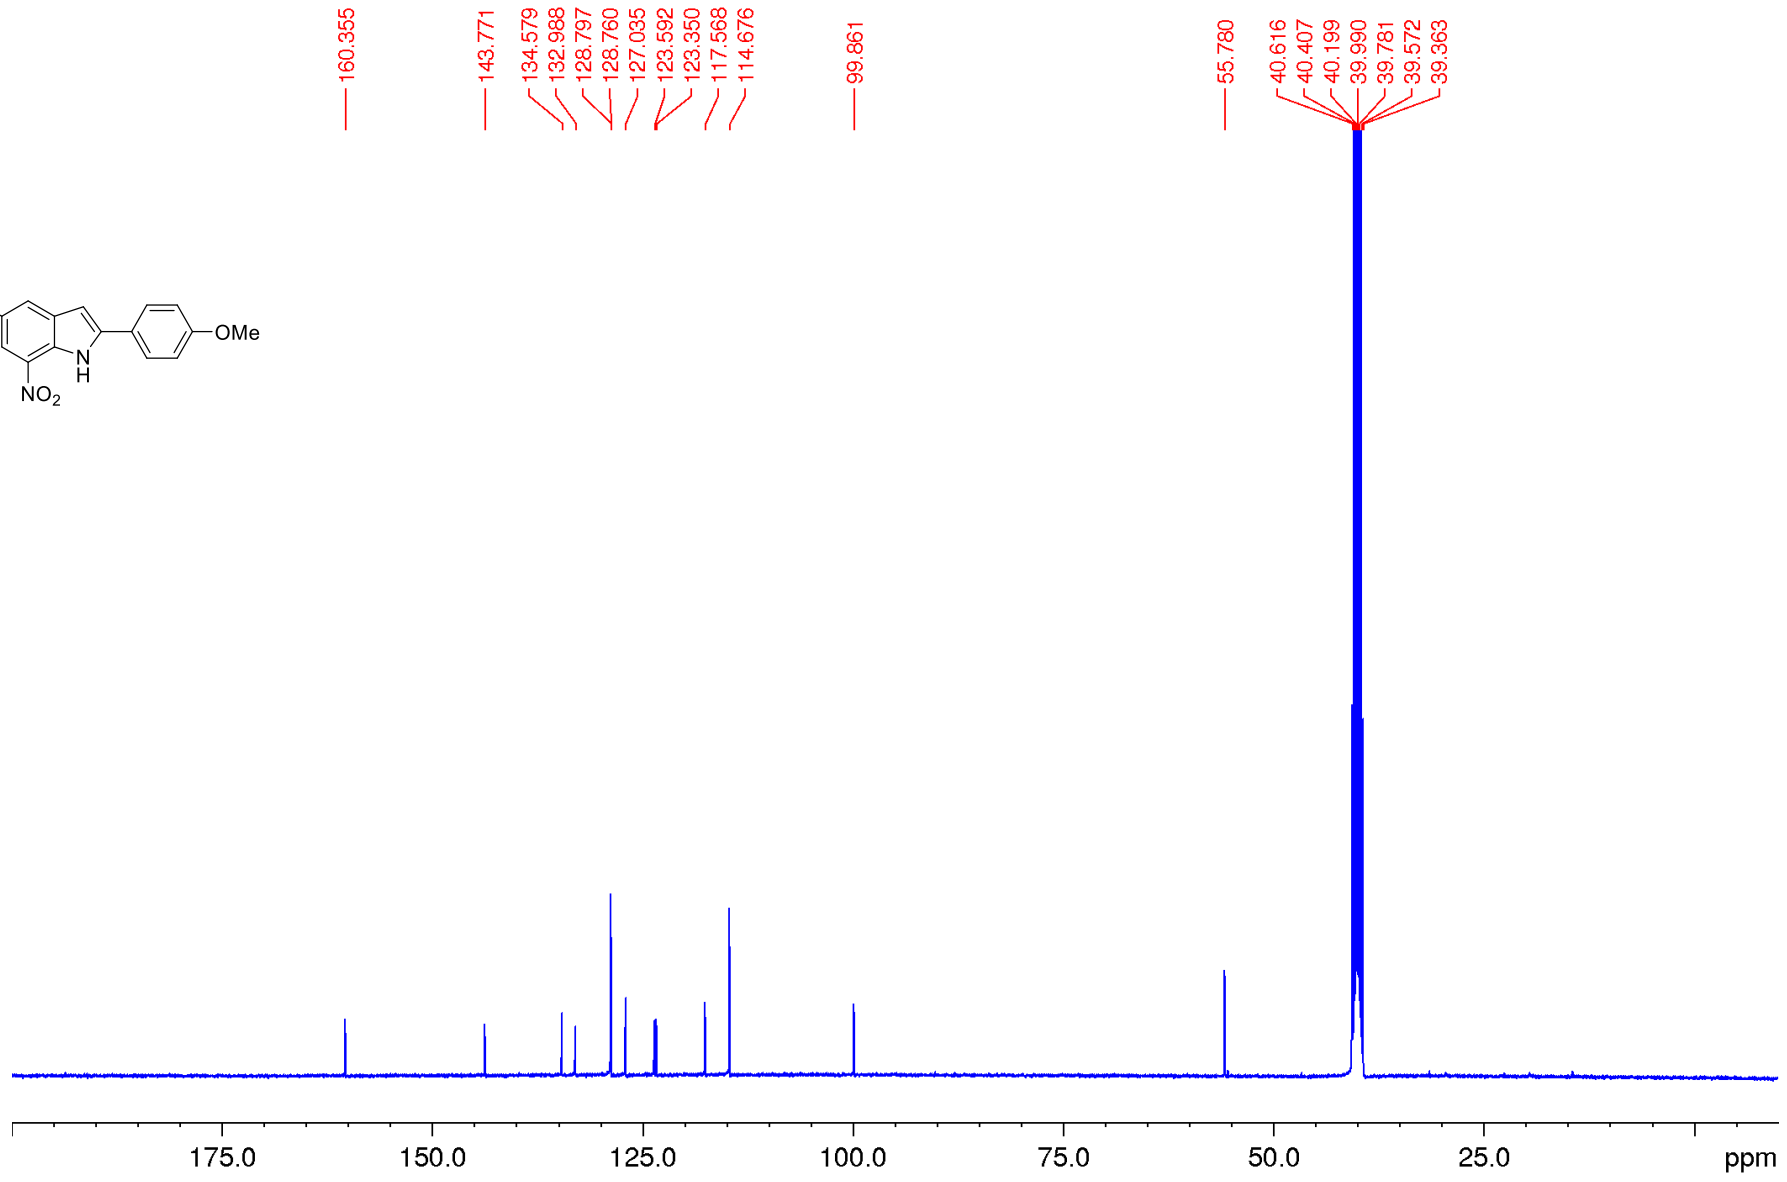

5-chloro-2-(4-methoxyphenyl)-7-nitro-1*H*-indole 5b



128.796  
127.034  
117.568  
114.675  
99.861  
55.780  
40.666  
40.457  
40.247  
40.038  
39.829

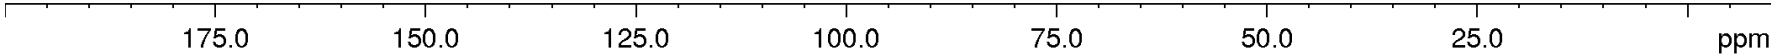

# 5-methyl-7-nitro-2-phenyl-1H-indole 5c

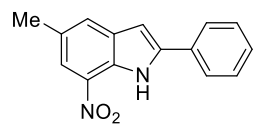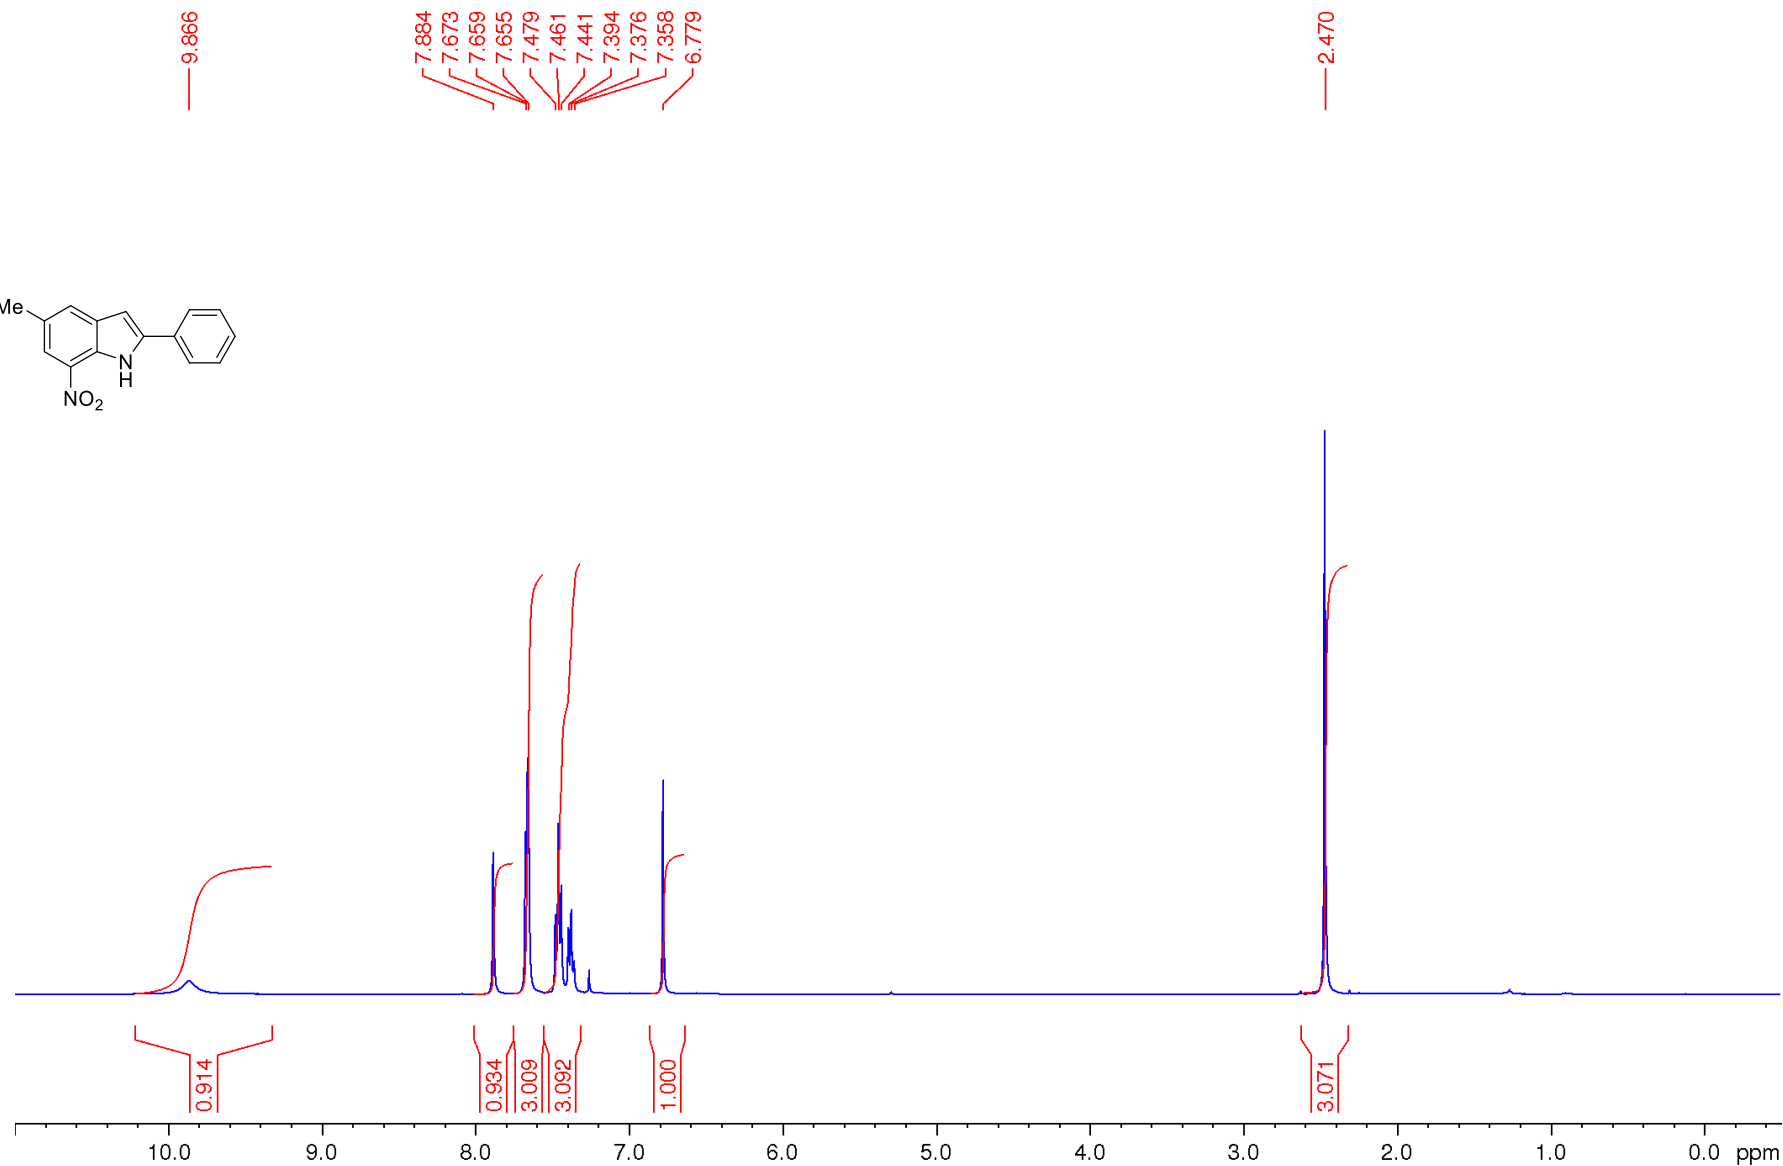



# 5-methyl-7-nitro-2-phenyl-1H-indole 5c

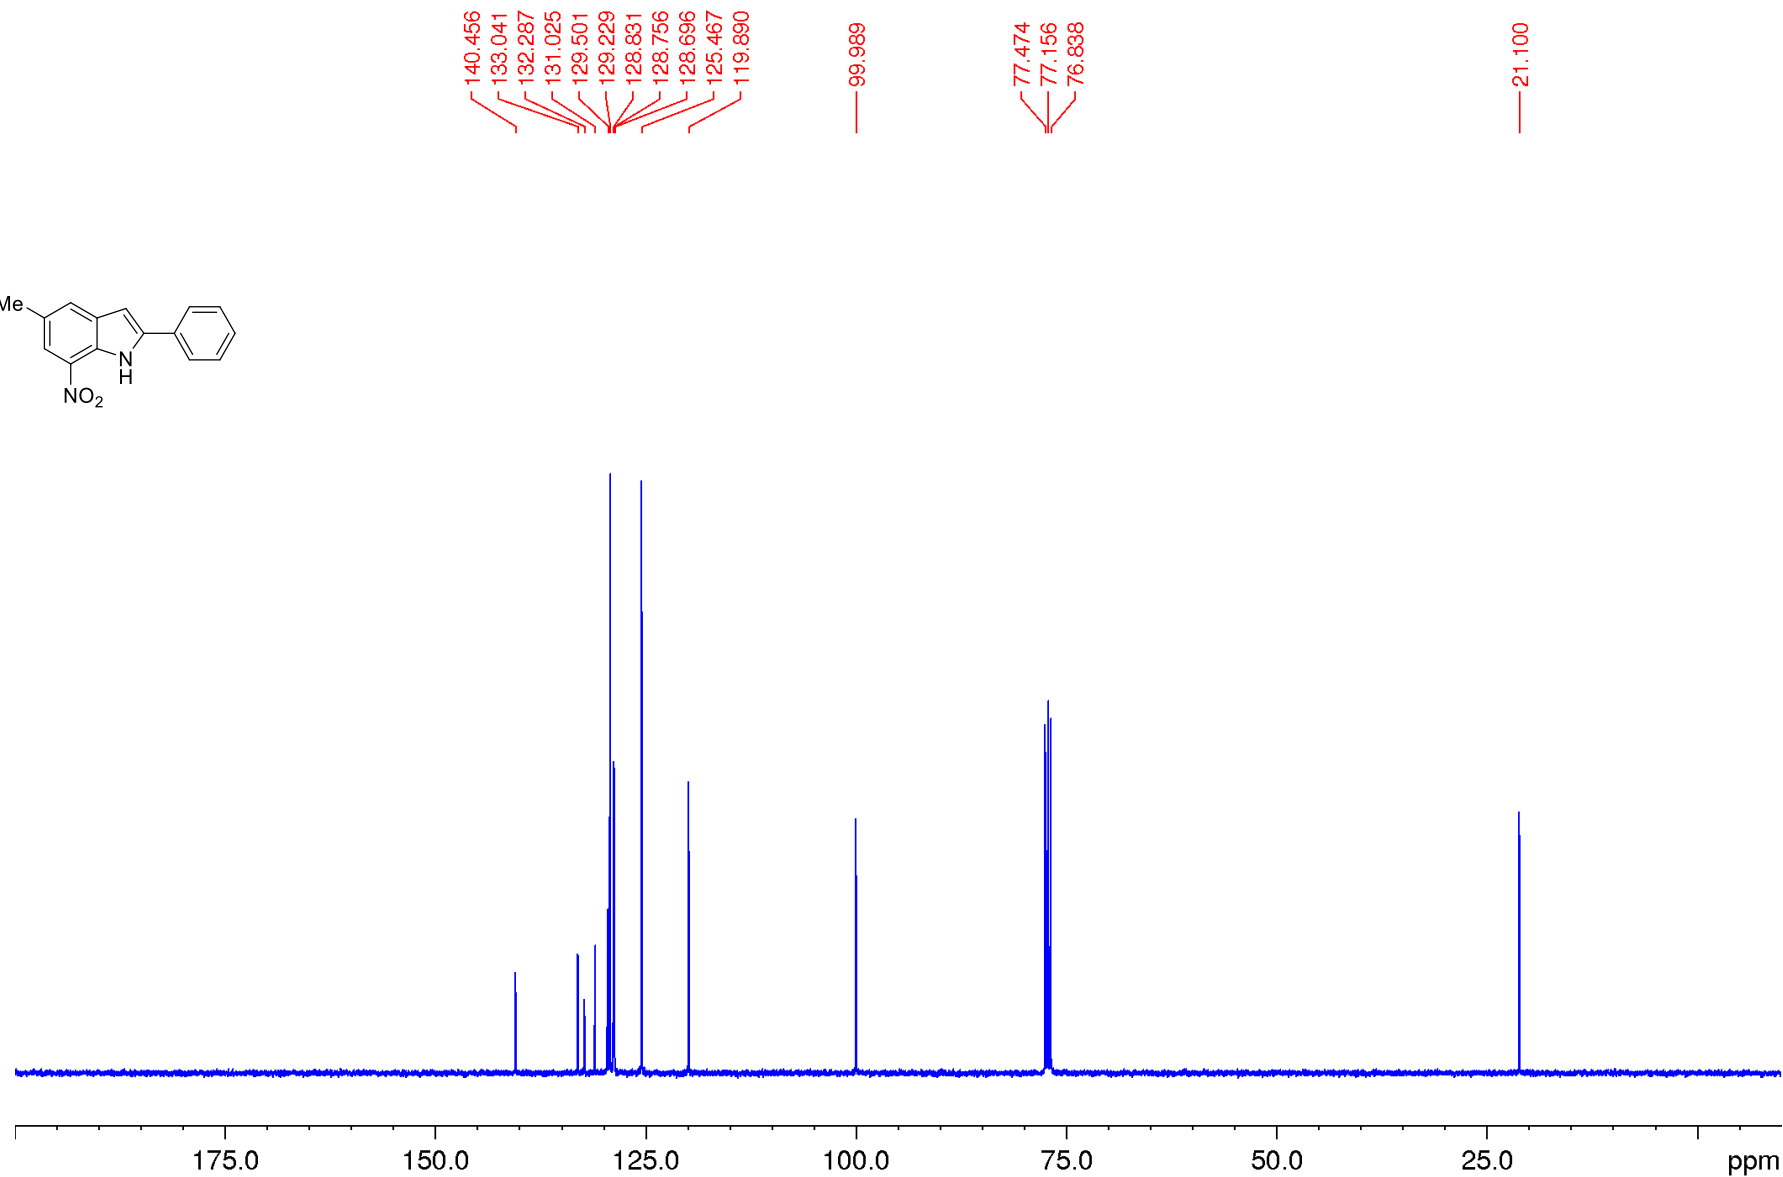

# 5-methyl-7-nitro-2-phenyl-1H-indole 5c

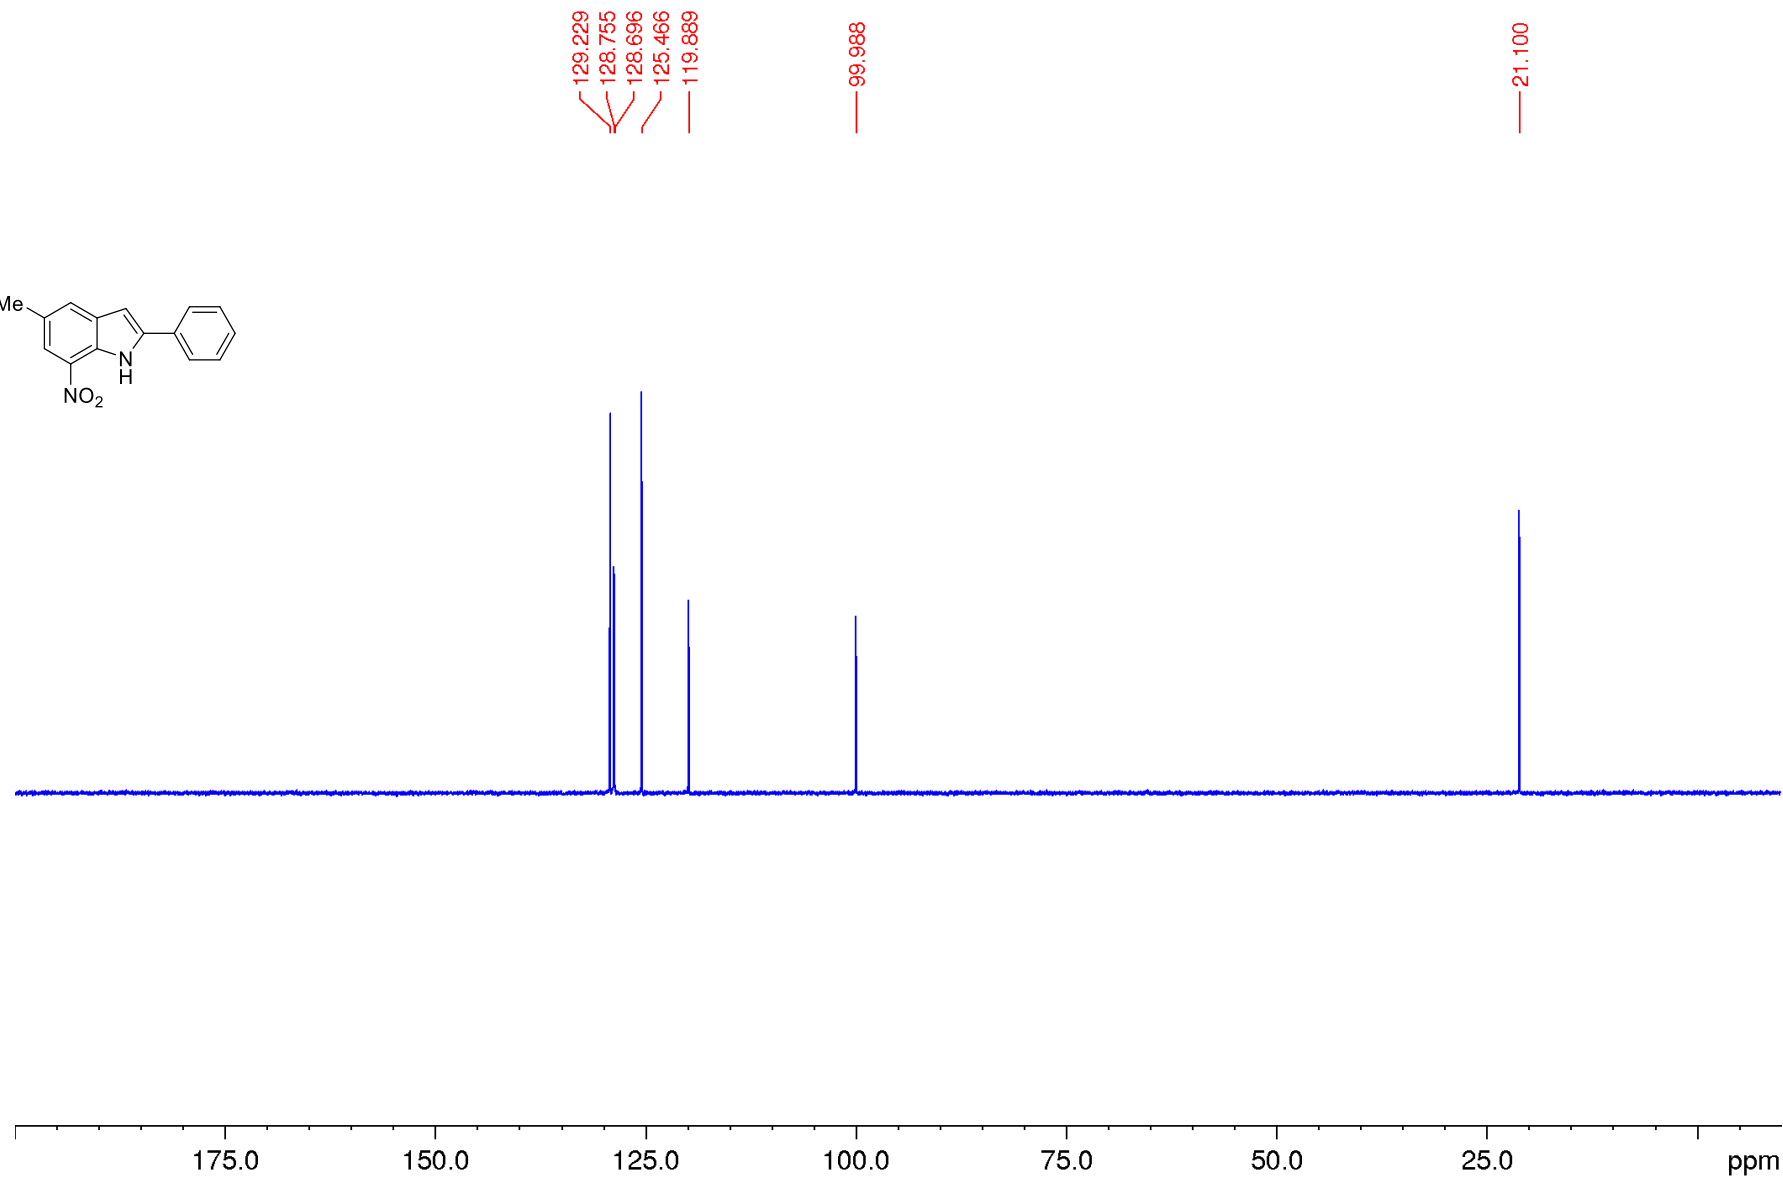

methyl 4-(5-methyl-7-nitro-1*H*-indol-2-yl)benzoate 5d

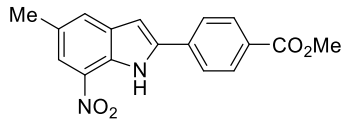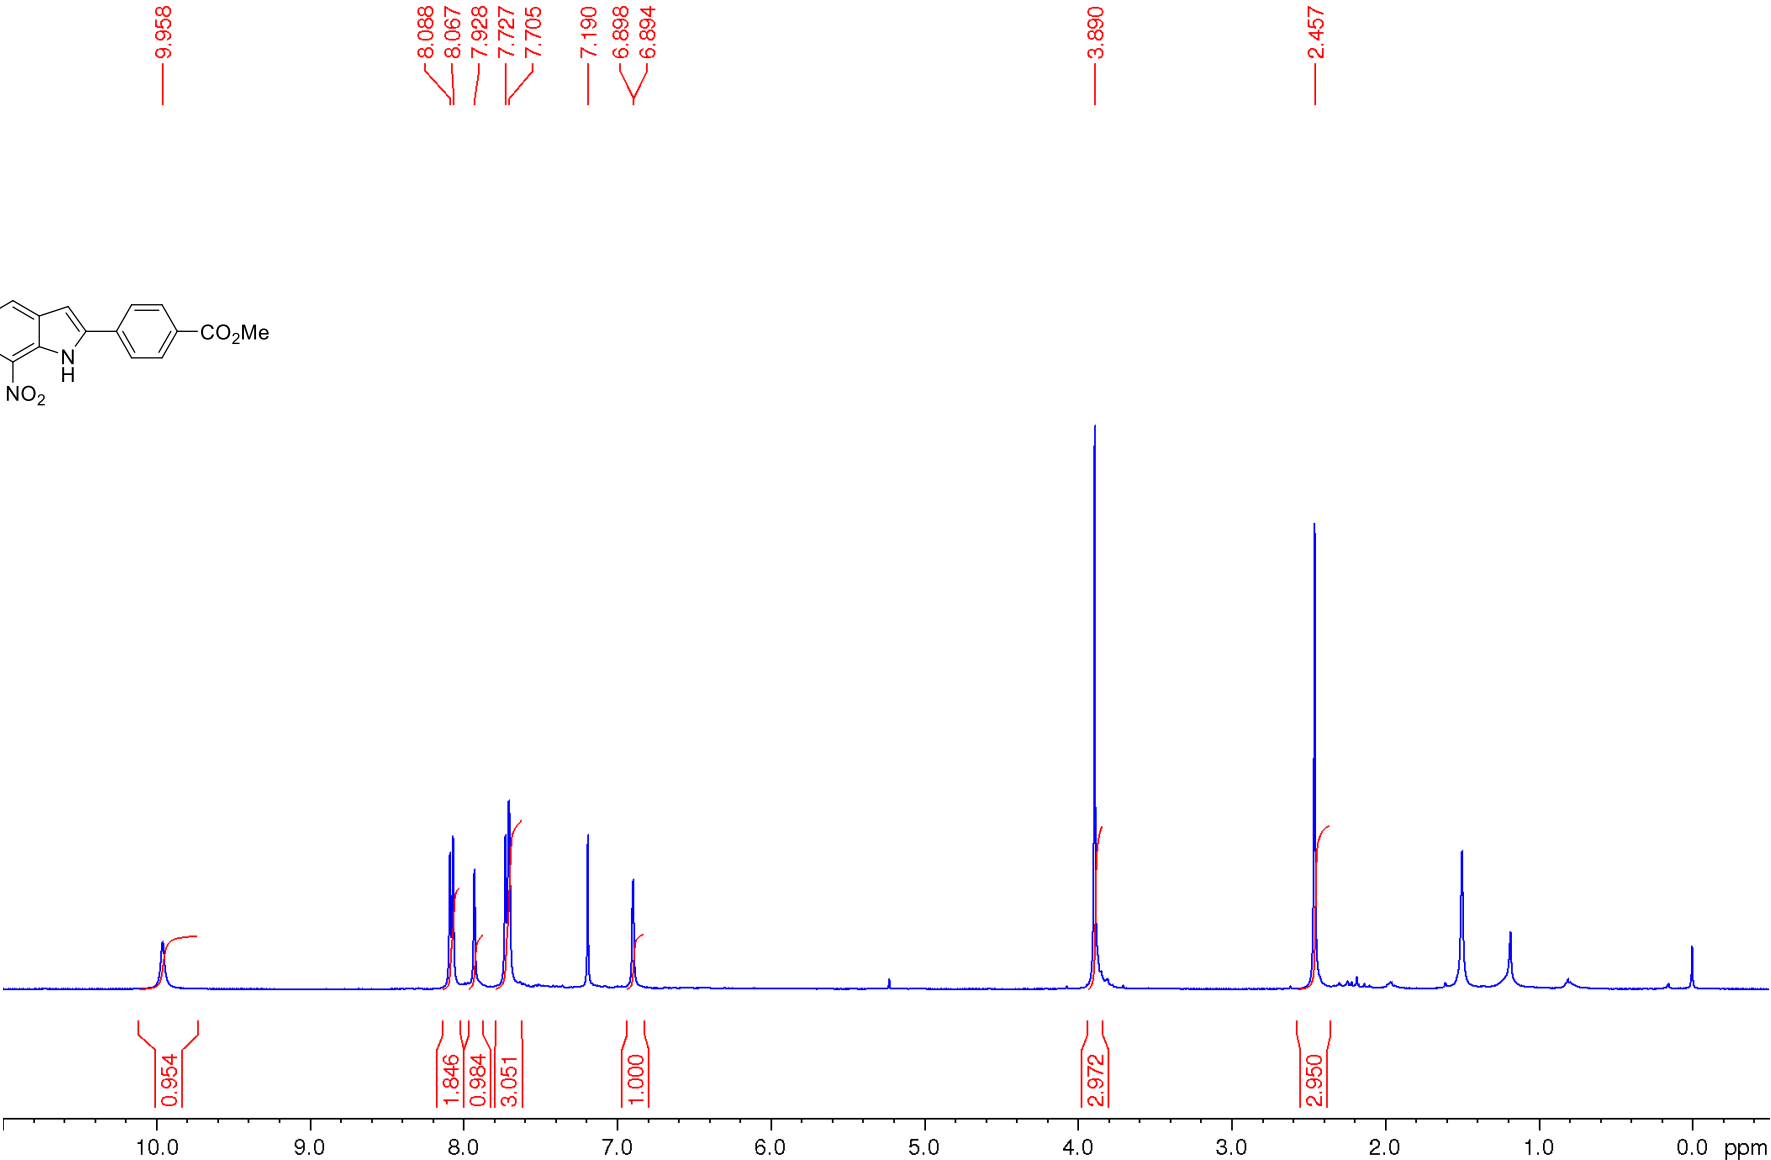

methyl 4-(5-methyl-7-nitro-1*H*-indol-2-yl)benzoate 5d

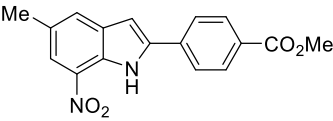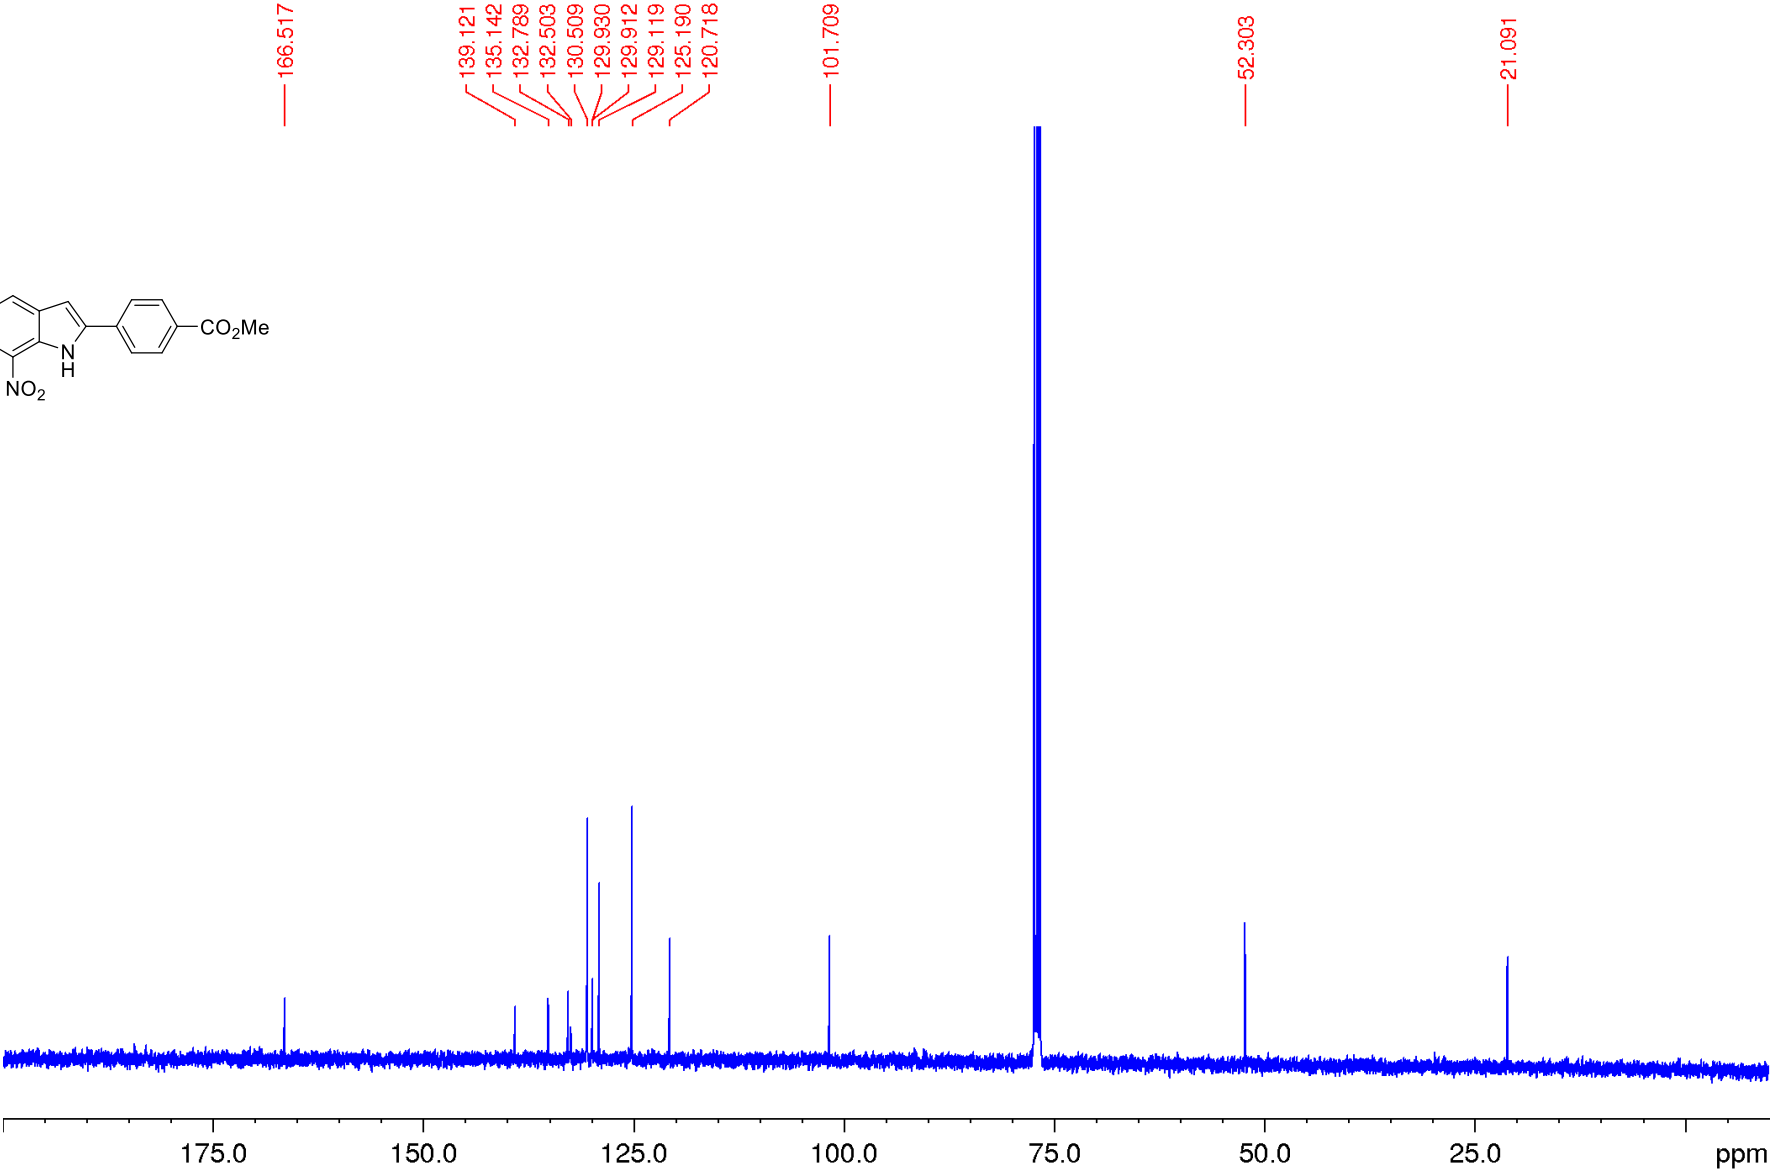

methyl 4-(5-methyl-7-nitro-1*H*-indol-2-yl)benzoate 5d

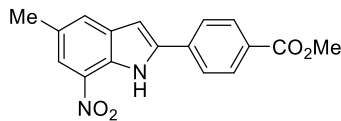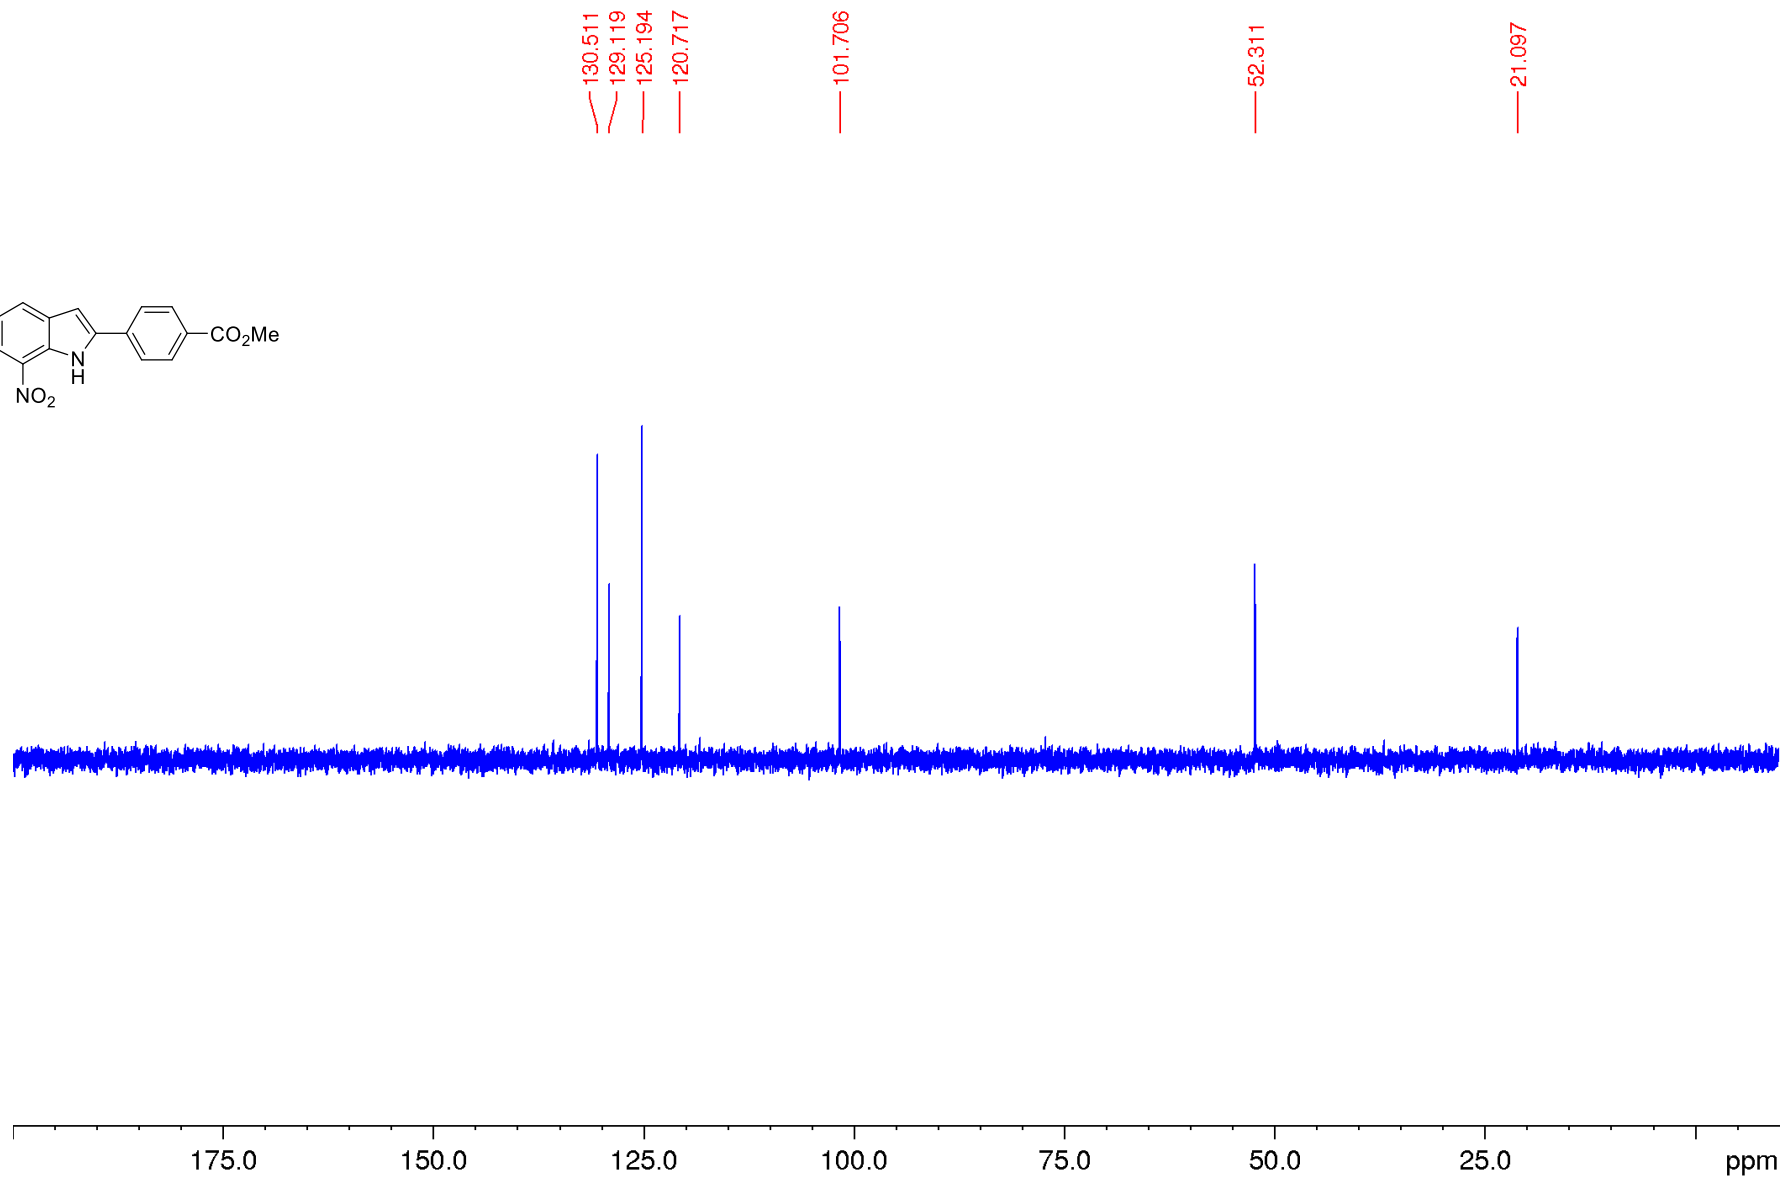

**5-chloro-7-nitro-2-phenyl-1-(prop-2-yn-1-yl)-1H-indole 6a**

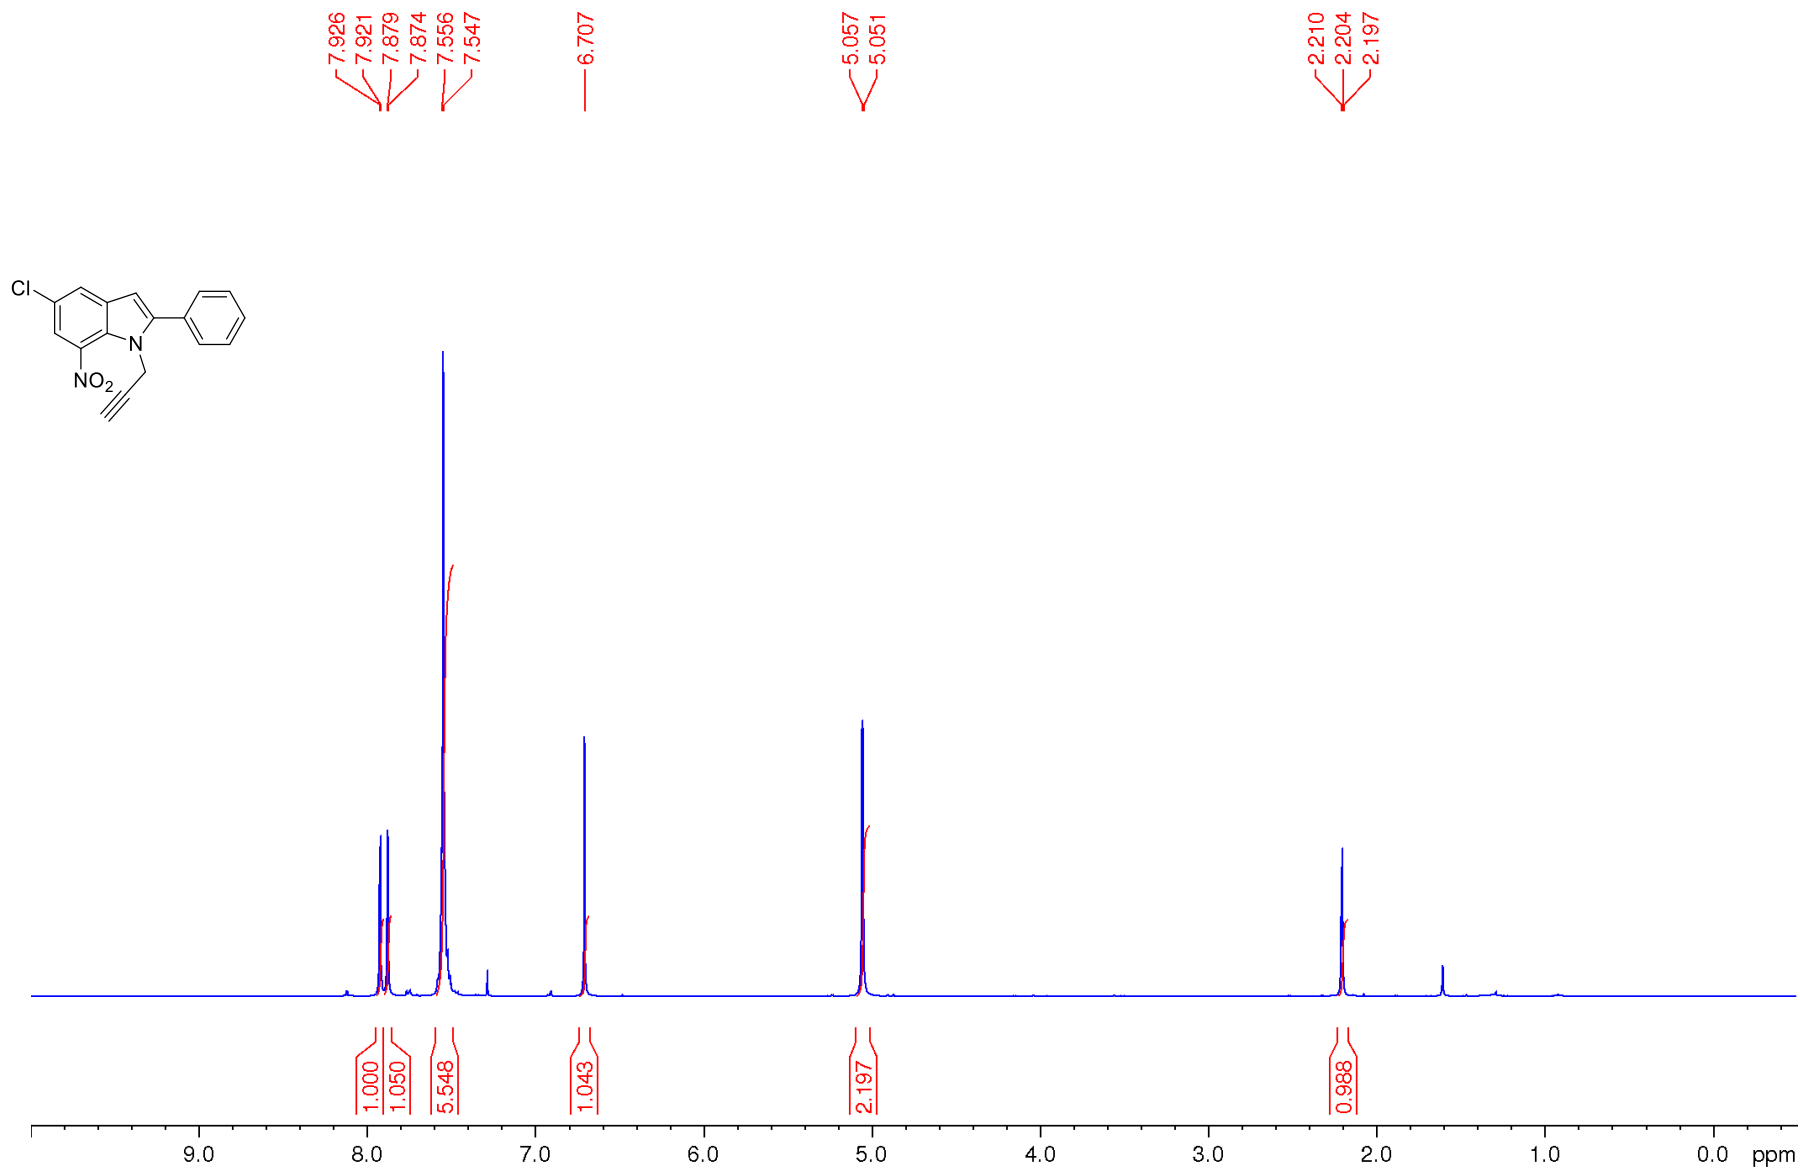

**5-chloro-7-nitro-2-phenyl-1-(prop-2-yn-1-yl)-1*H*-indole 6a**

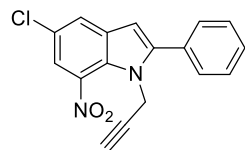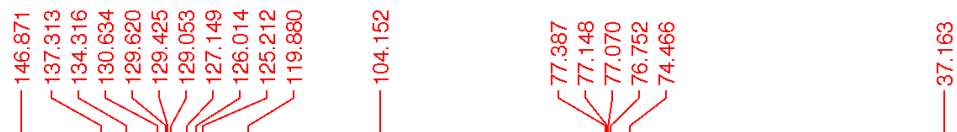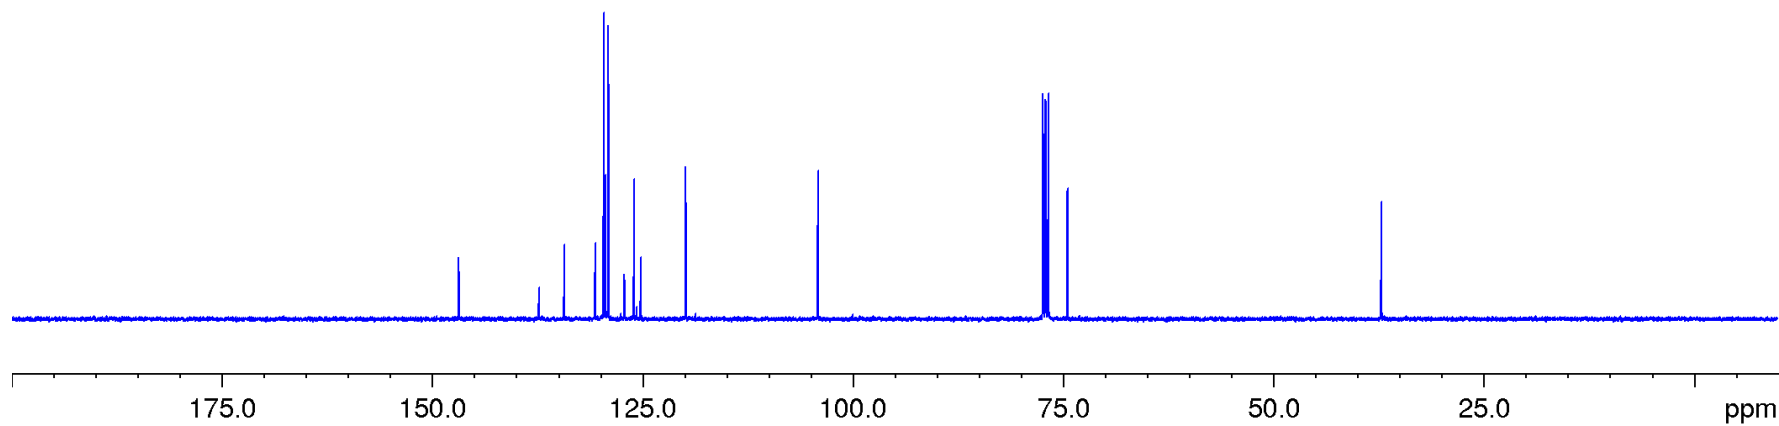

**5-chloro-7-nitro-2-phenyl-1-(prop-2-yn-1-yl)-1H-indole 6a**

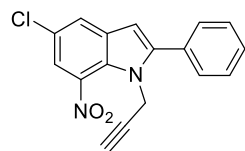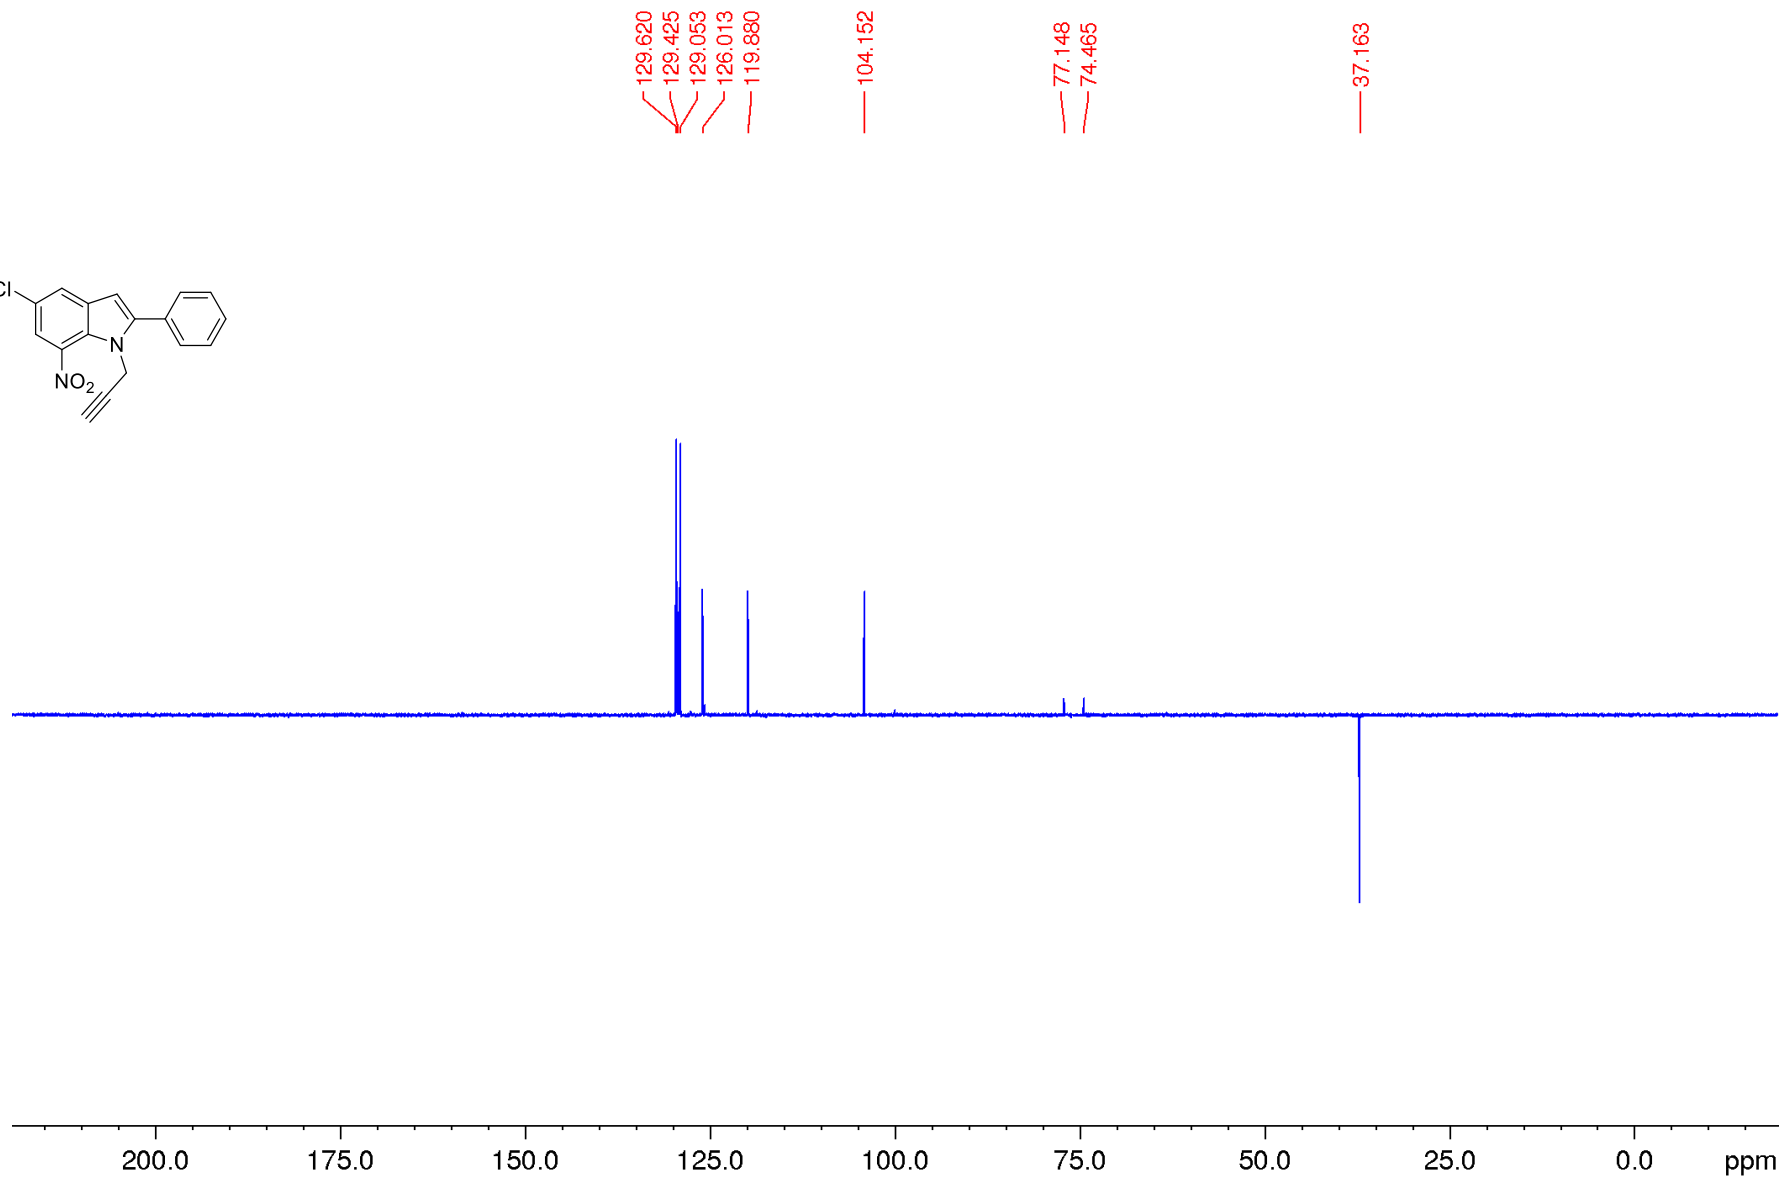



**5-chloro-2-(4-methoxyphenyl)-7-nitro-1-(prop-2-yn-1-yl)-1H-indole 6b**

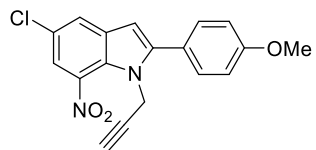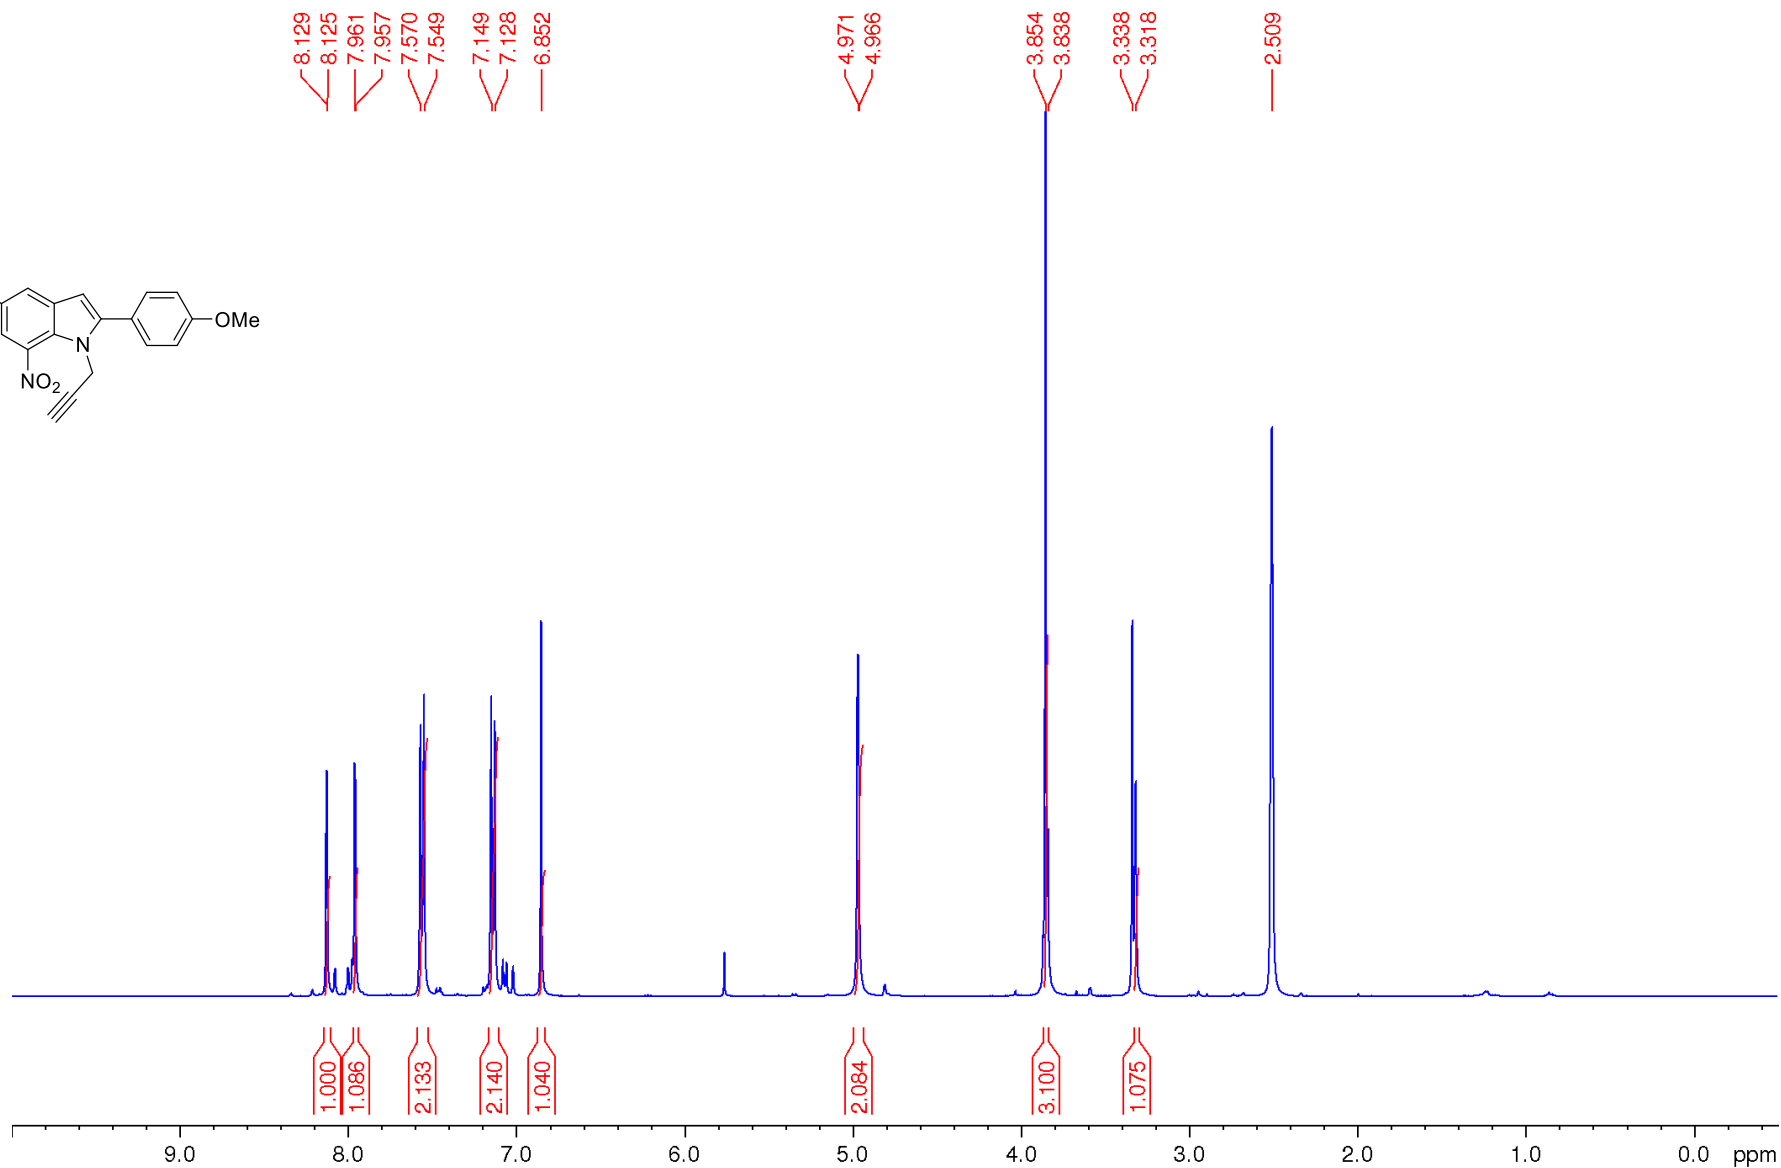

**5-chloro-2-(4-methoxyphenyl)-7-nitro-1-(prop-2-yn-1-yl)-1*H*-indole 6b**

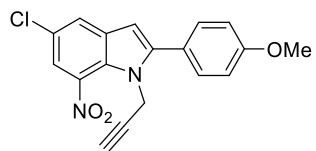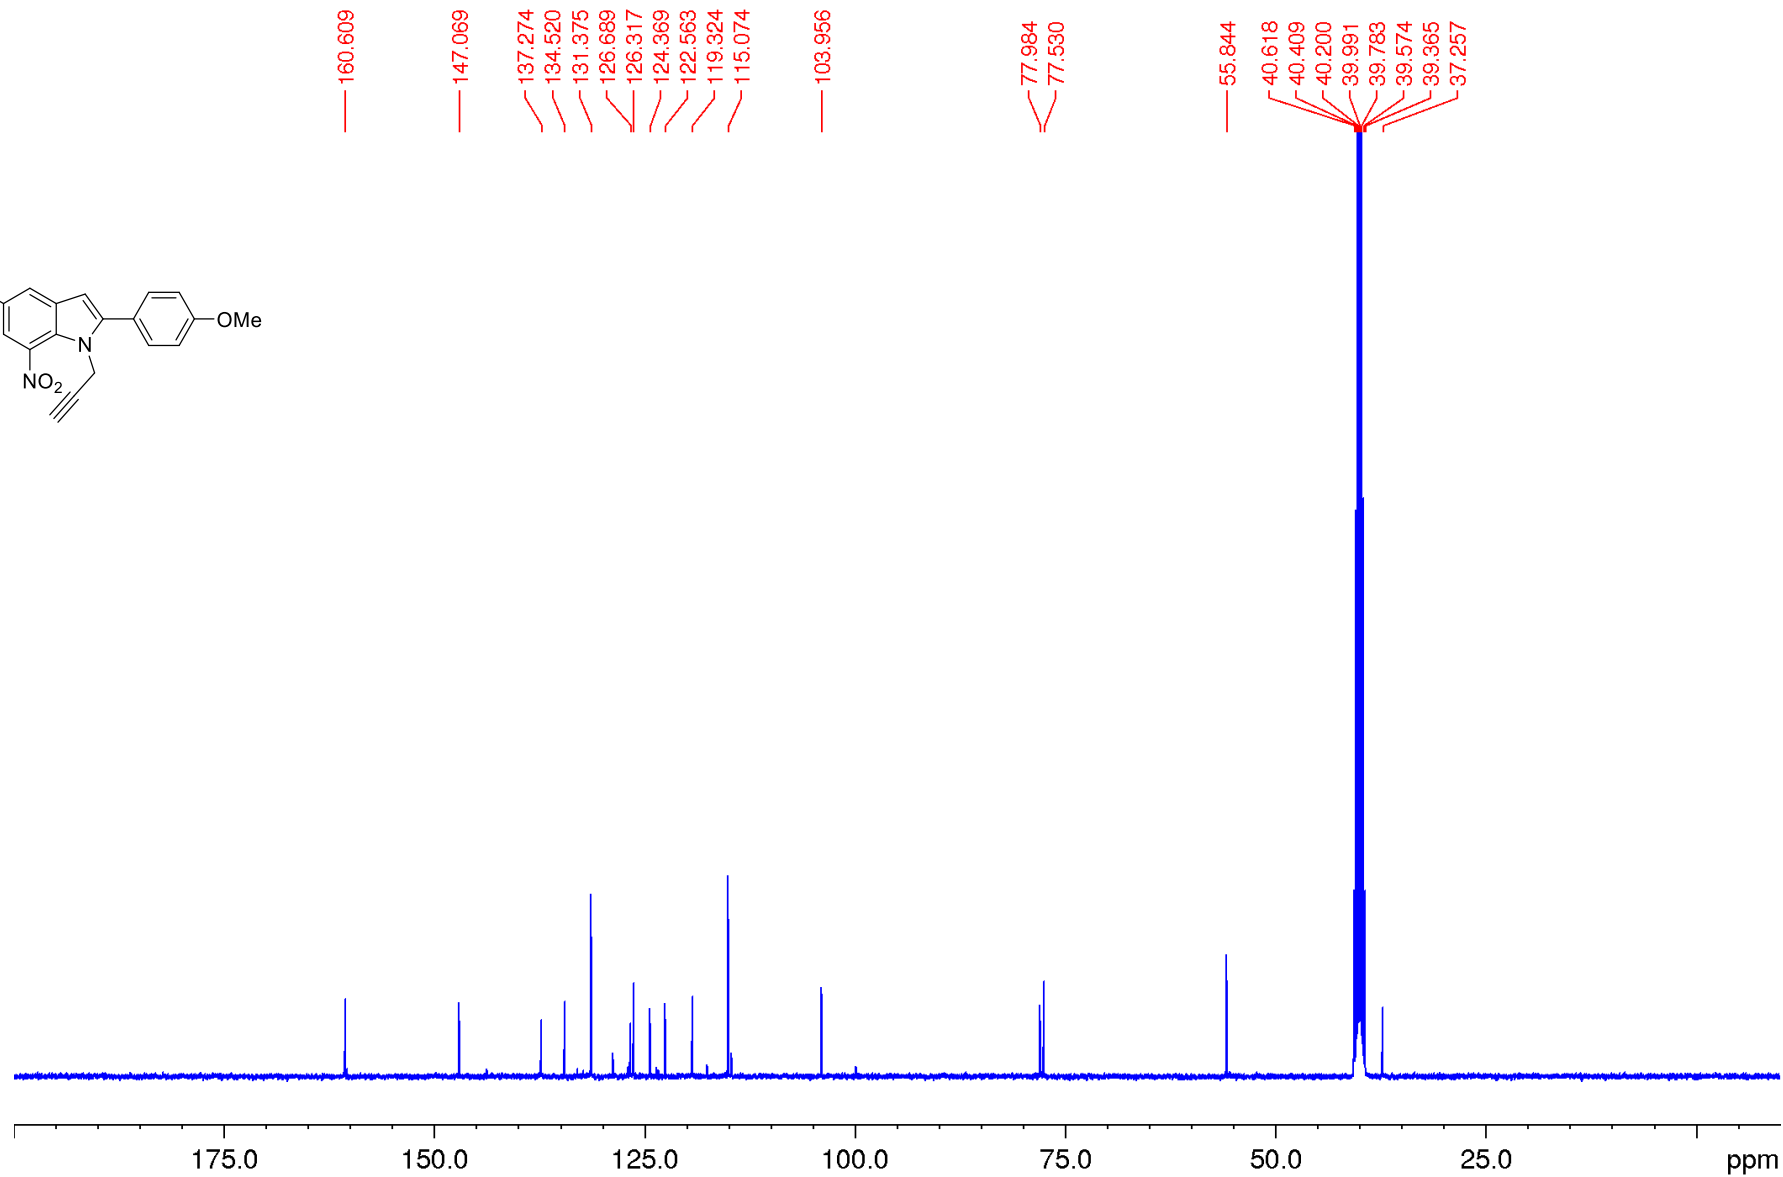

**5-chloro-2-(4-methoxyphenyl)-7-nitro-1-(prop-2-yn-1-yl)-1*H*-indole 6b**



131.374  
126.317  
119.323  
115.074  
103.955  
77.984  
77.530  
55.842  
40.668  
40.457  
40.247  
40.038  
39.828  
37.256

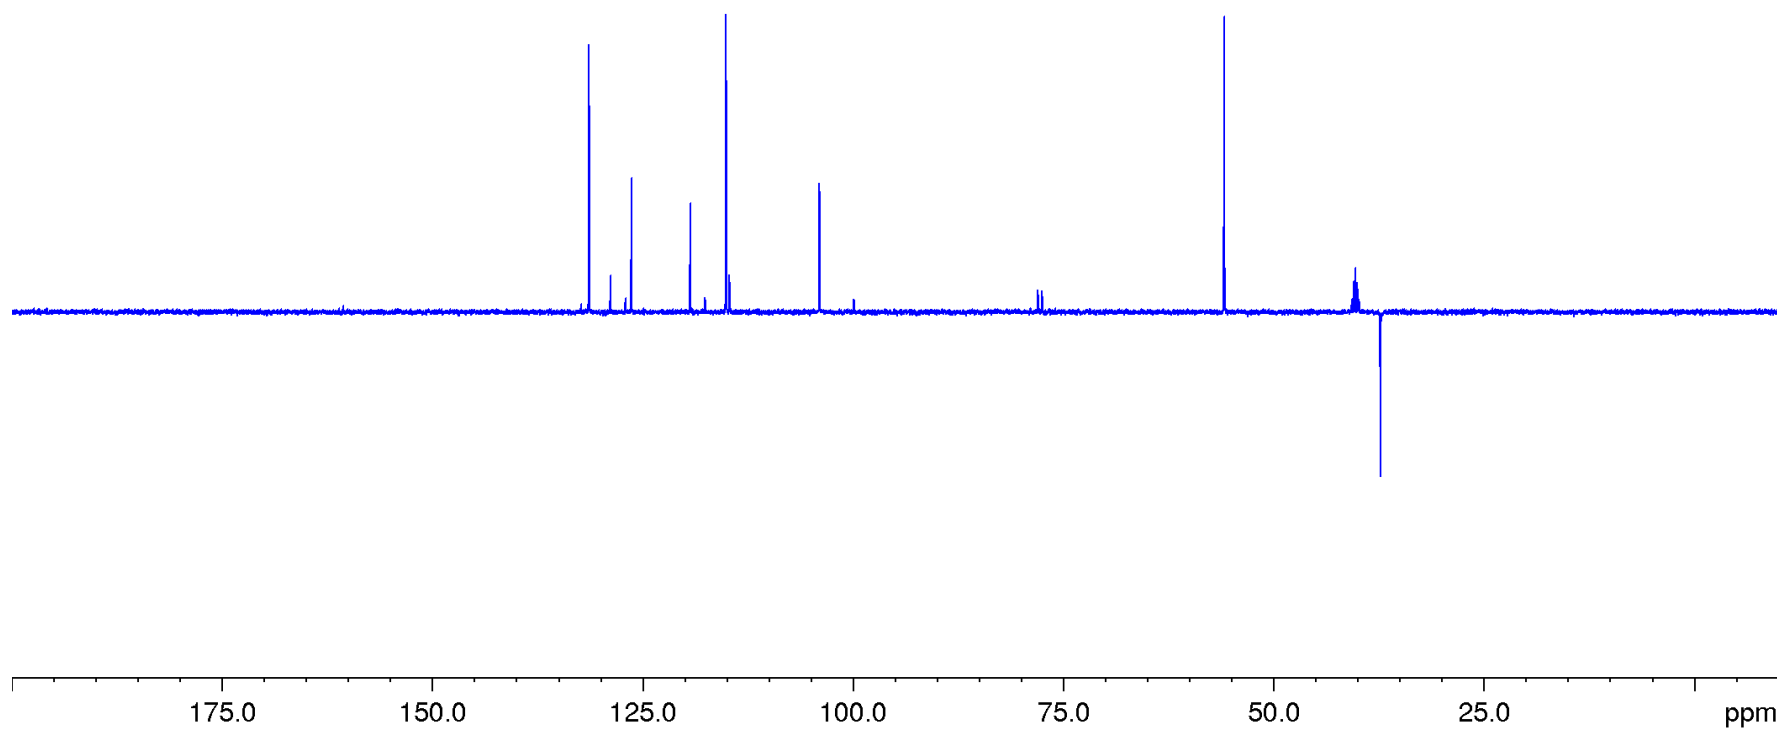

**5-methyl-7-nitro-2-phenyl-1-(prop-2-yn-1-yl)-1H-indole 6c**

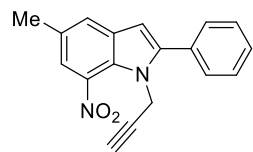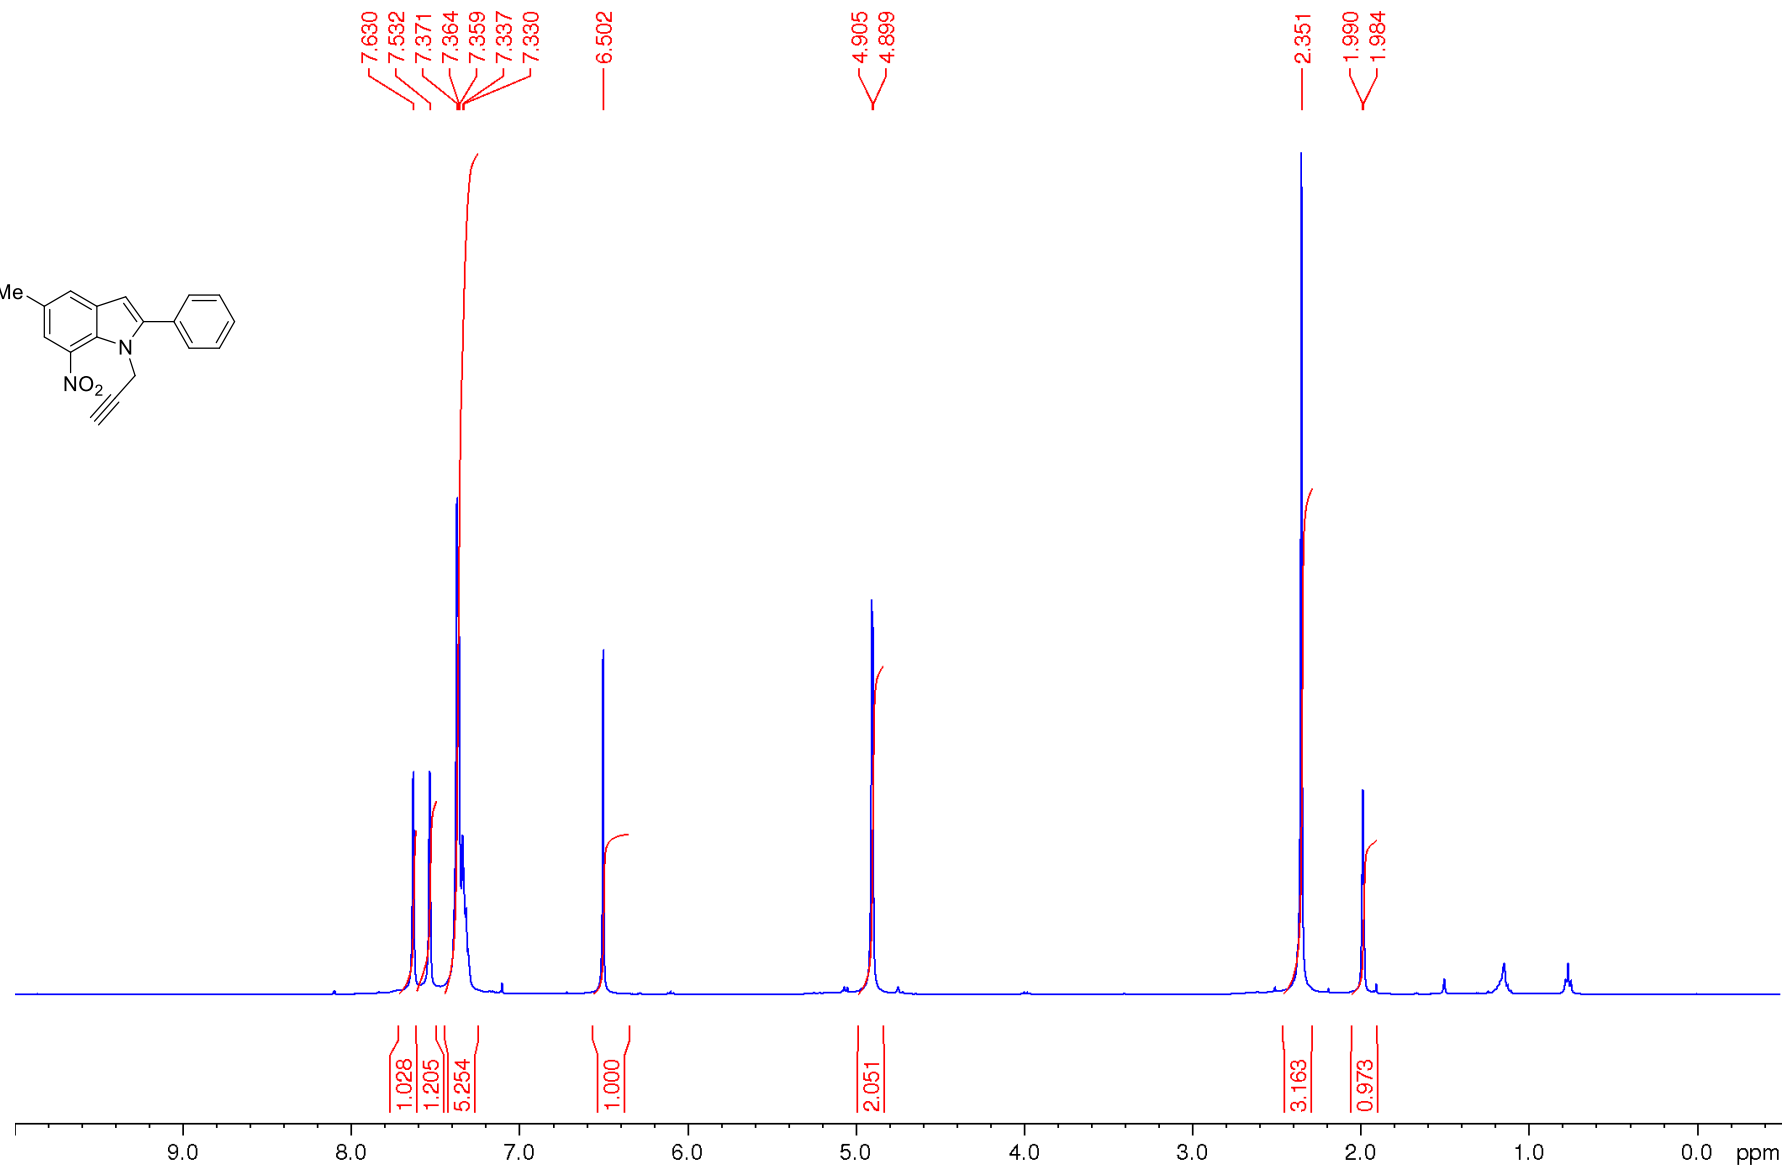

# 5-methyl-7-nitro-2-phenyl-1-(prop-2-yn-1-yl)-1H-indole 6c

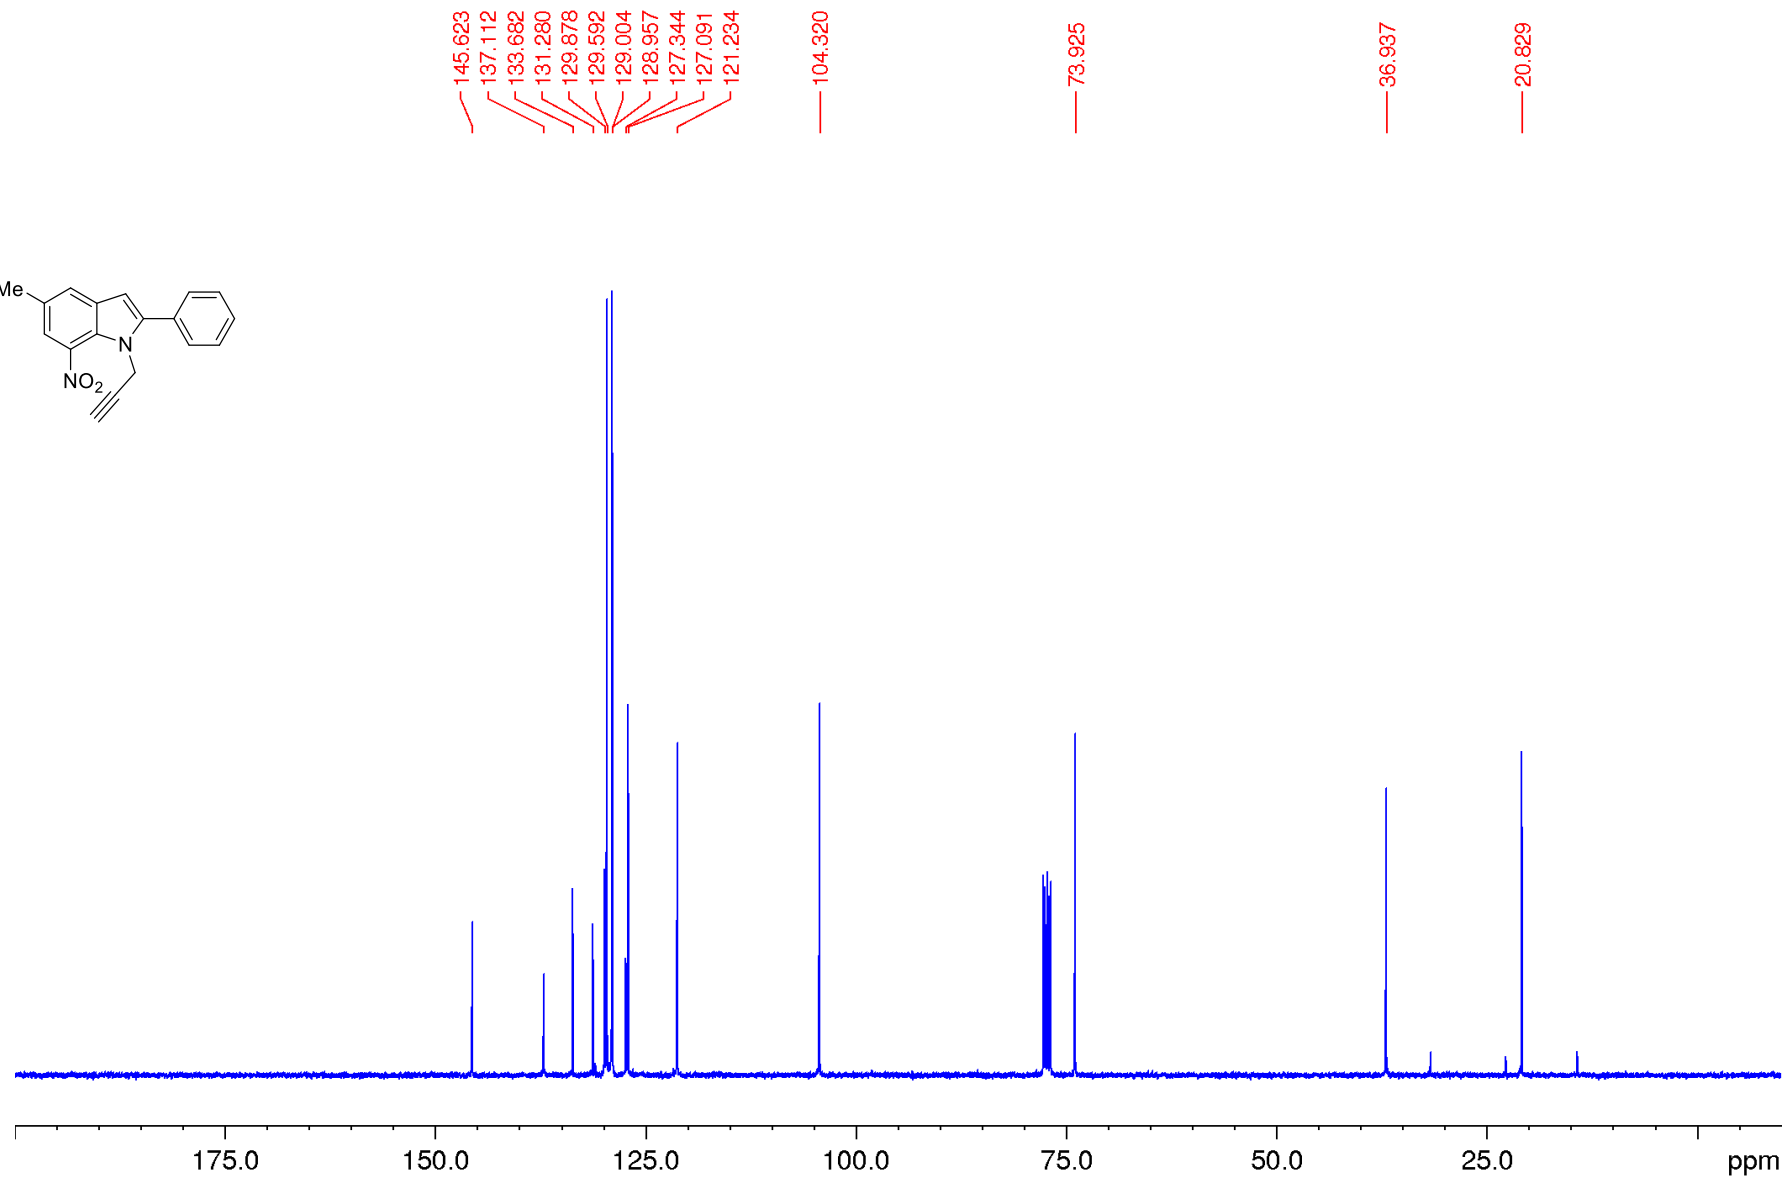

**5-methyl-7-nitro-2-phenyl-1-(prop-2-yn-1-yl)-1H-indole 6c**

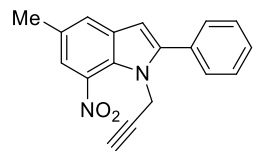

129.592  
129.004  
128.957  
127.092  
121.234

104.321

77.677  
73.920

36.938

20.829

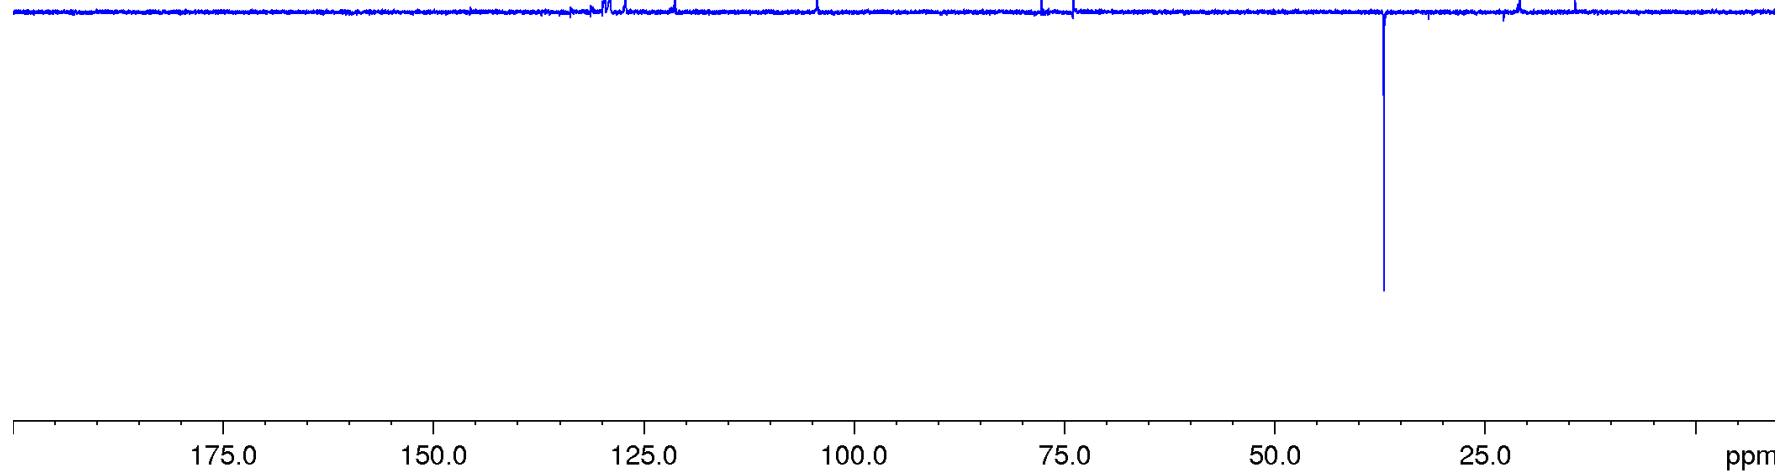

**methyl 4-(5-methyl-7-nitro-1-(prop-2-yn-1-yl)-1H-indol-2-yl)benzoate 6d**

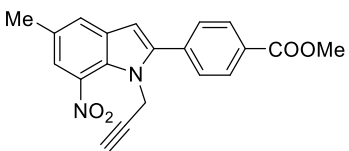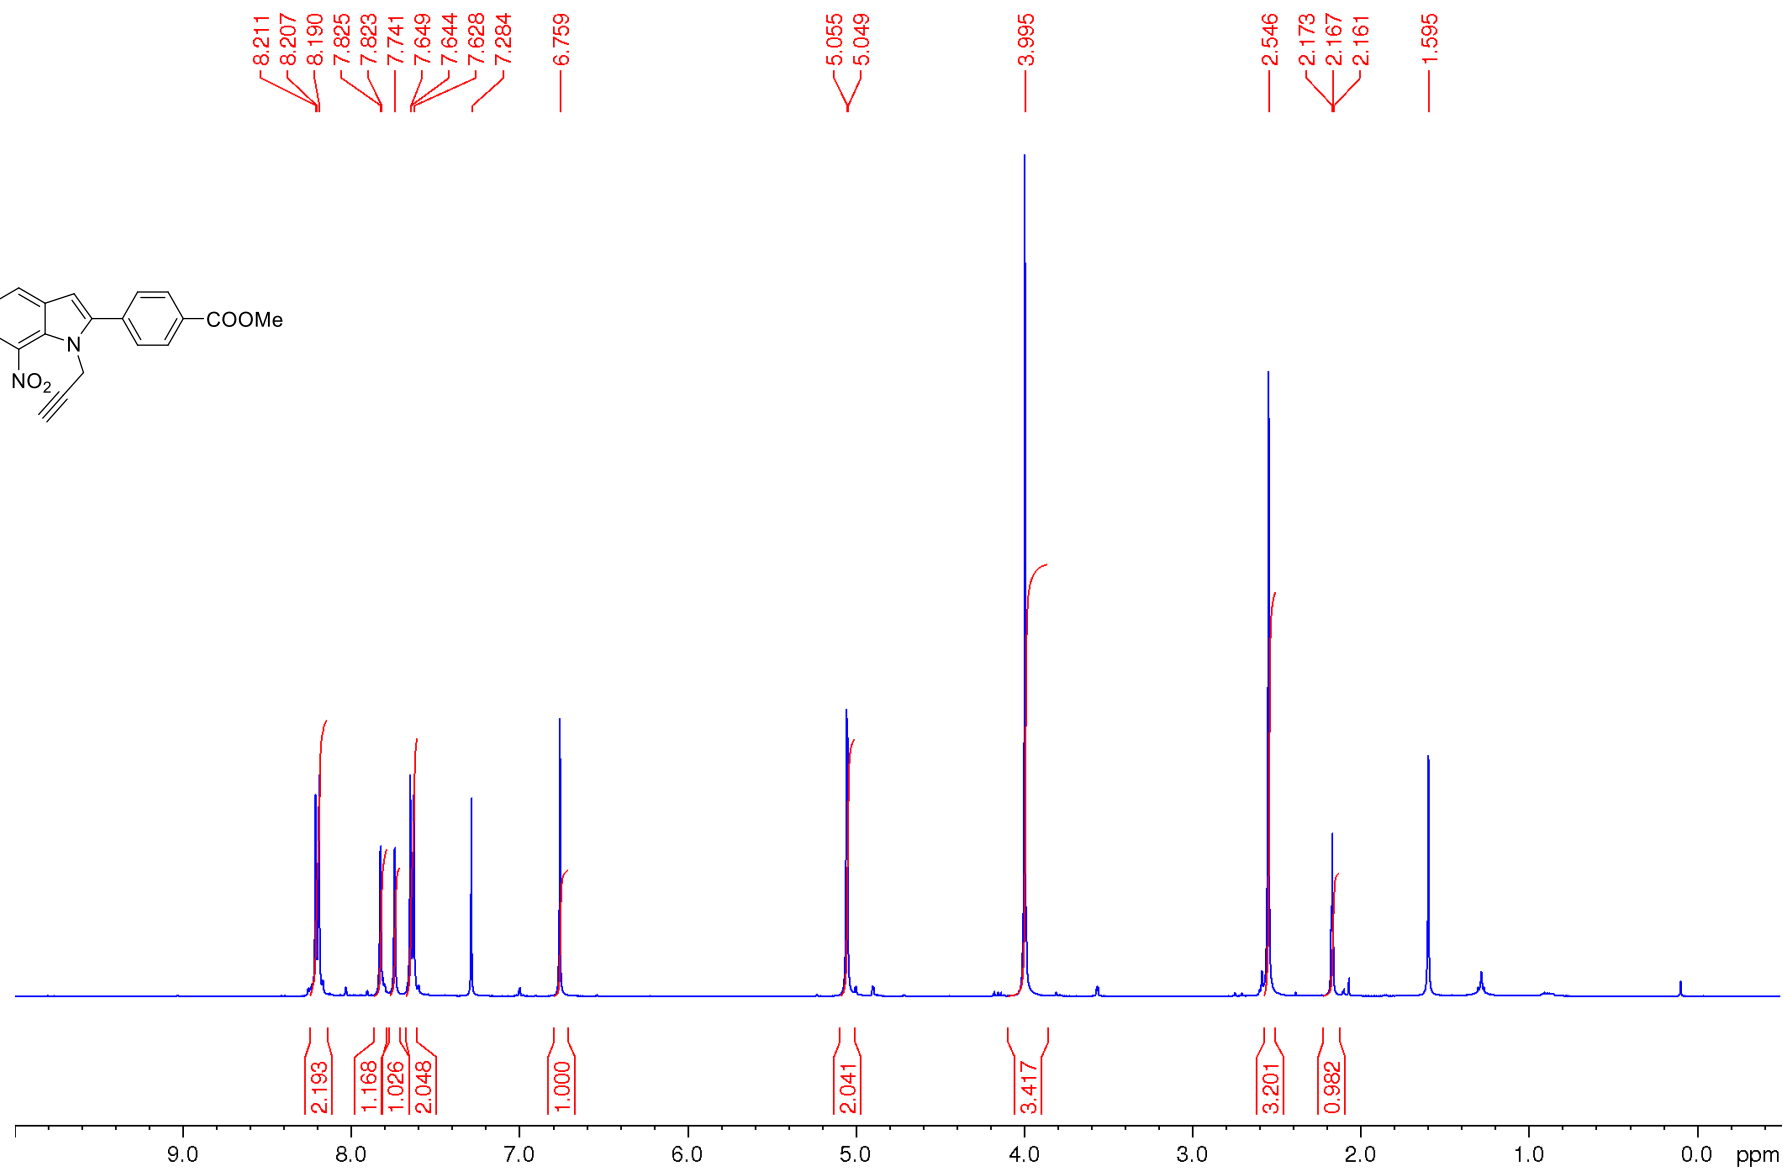

**methyl 4-(5-methyl-7-nitro-1-(prop-2-yn-1-yl)-1*H*-indol-2-yl)benzoate 6d**

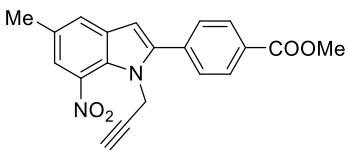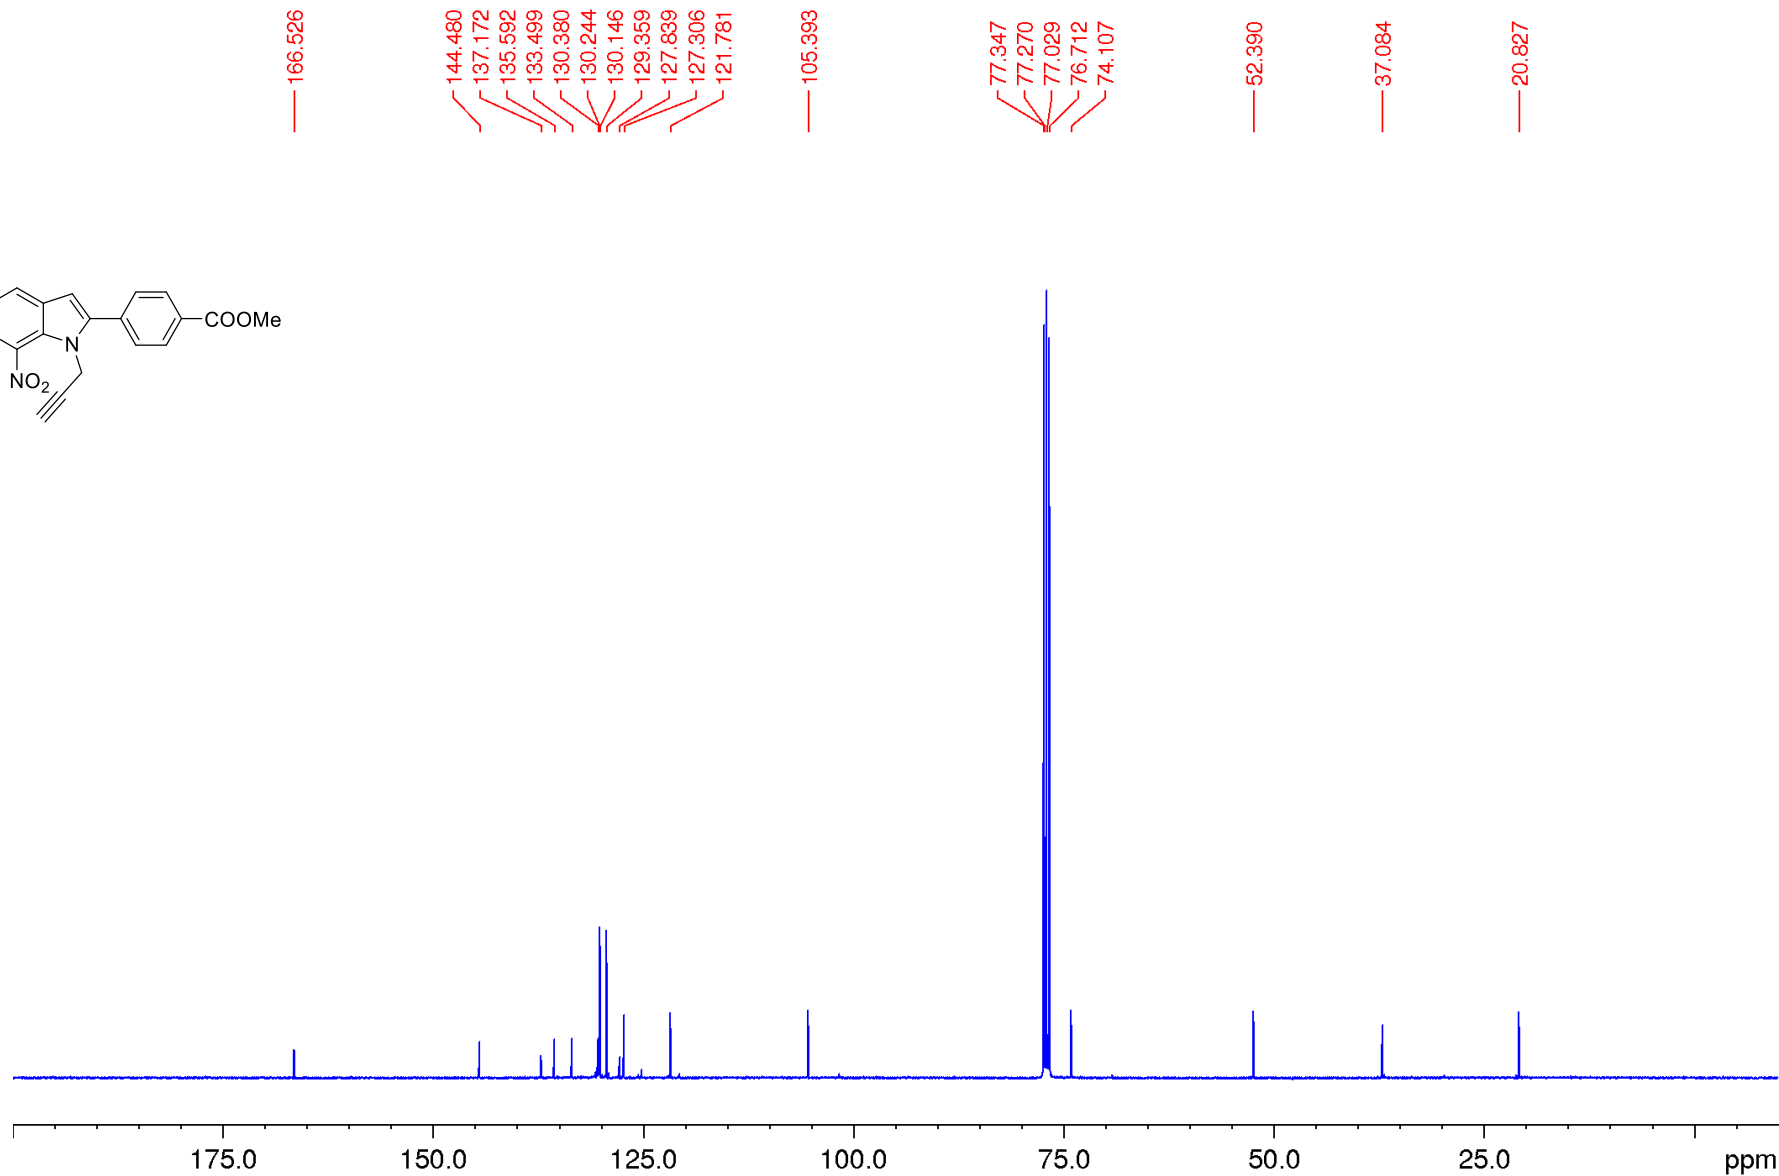



**methyl 4-(5-methyl-7-nitro-1-(prop-2-yn-1-yl)-1*H*-indol-2-yl)benzoate 6d**



130.145  
129.358  
127.304  
121.779  
105.393  
77.269  
74.108  
52.390  
37.085  
20.827

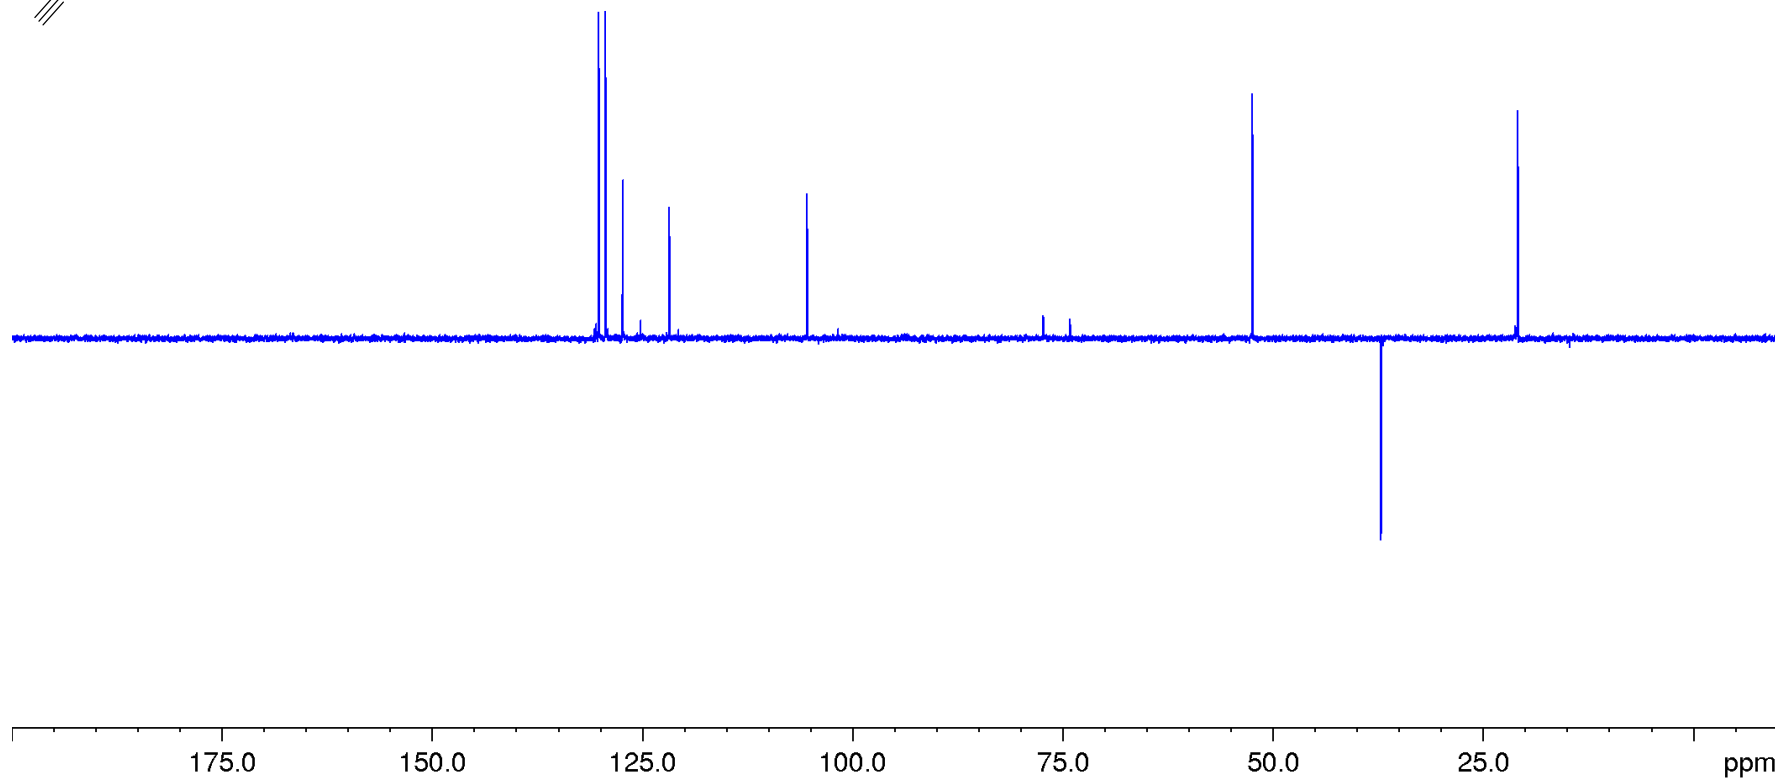

**5-chloro-7-nitro-2-phenyl-1-(3-phenylprop-2-yn-1-yl)-1*H*-indole 7a**

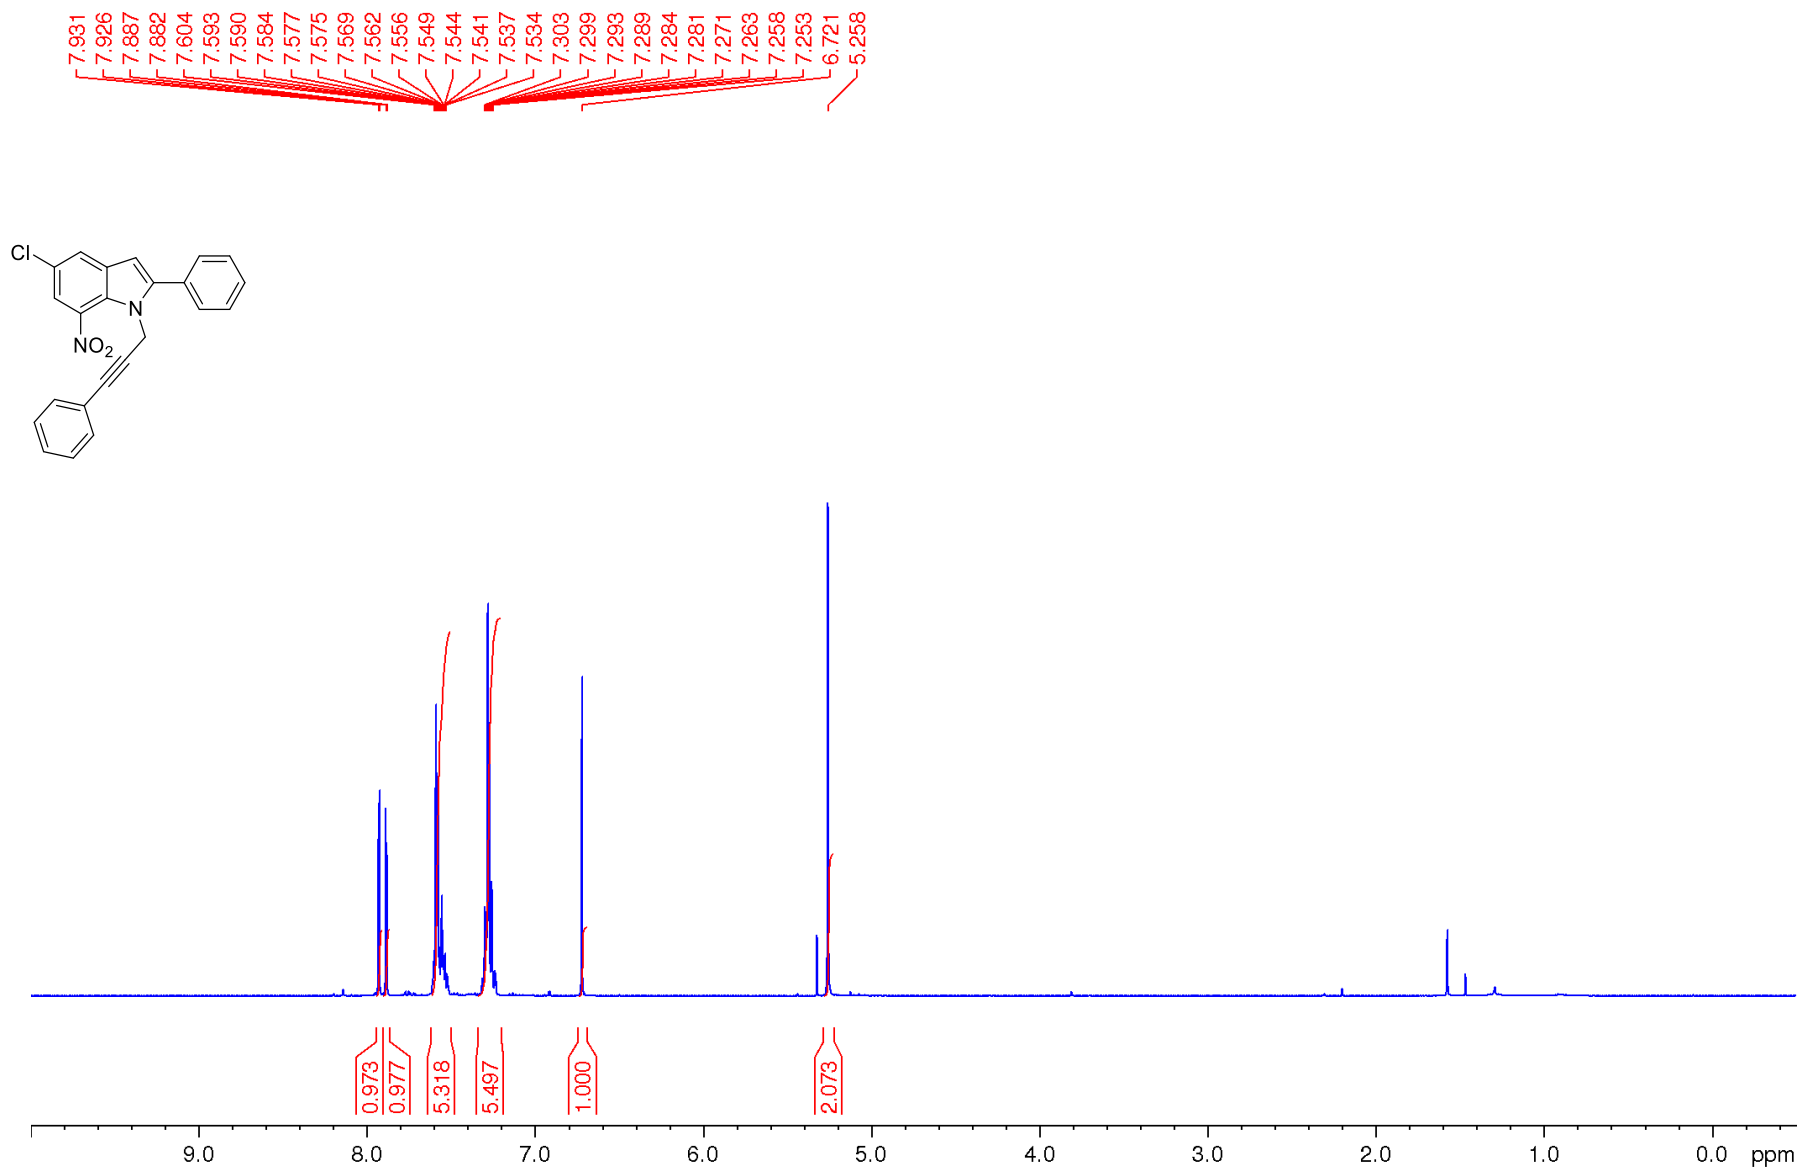

# 5-chloro-7-nitro-2-phenyl-1-(3-phenylprop-2-yn-1-yl)-1H-indole 7a

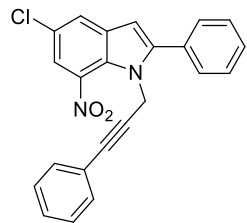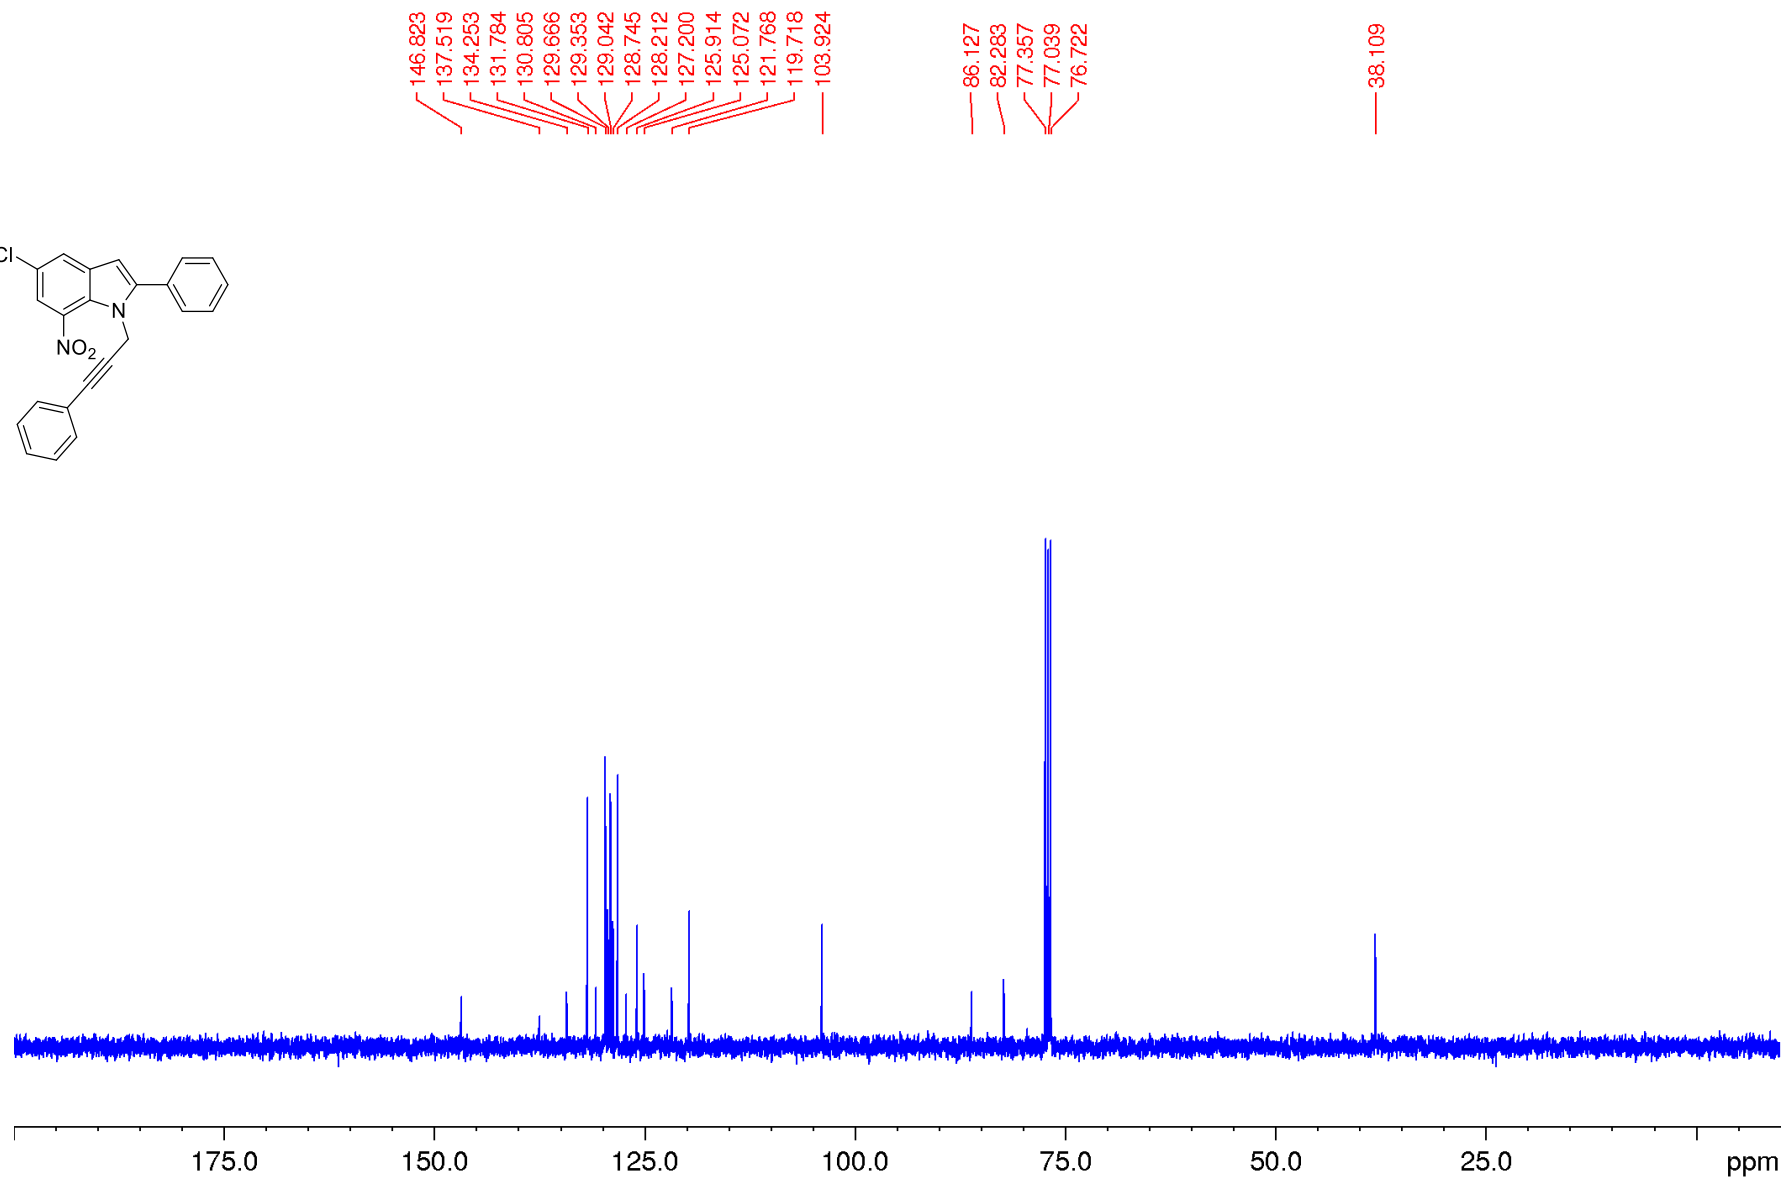

# 5-chloro-7-nitro-2-phenyl-1-(3-phenylprop-2-yn-1-yl)-1H-indole 7a

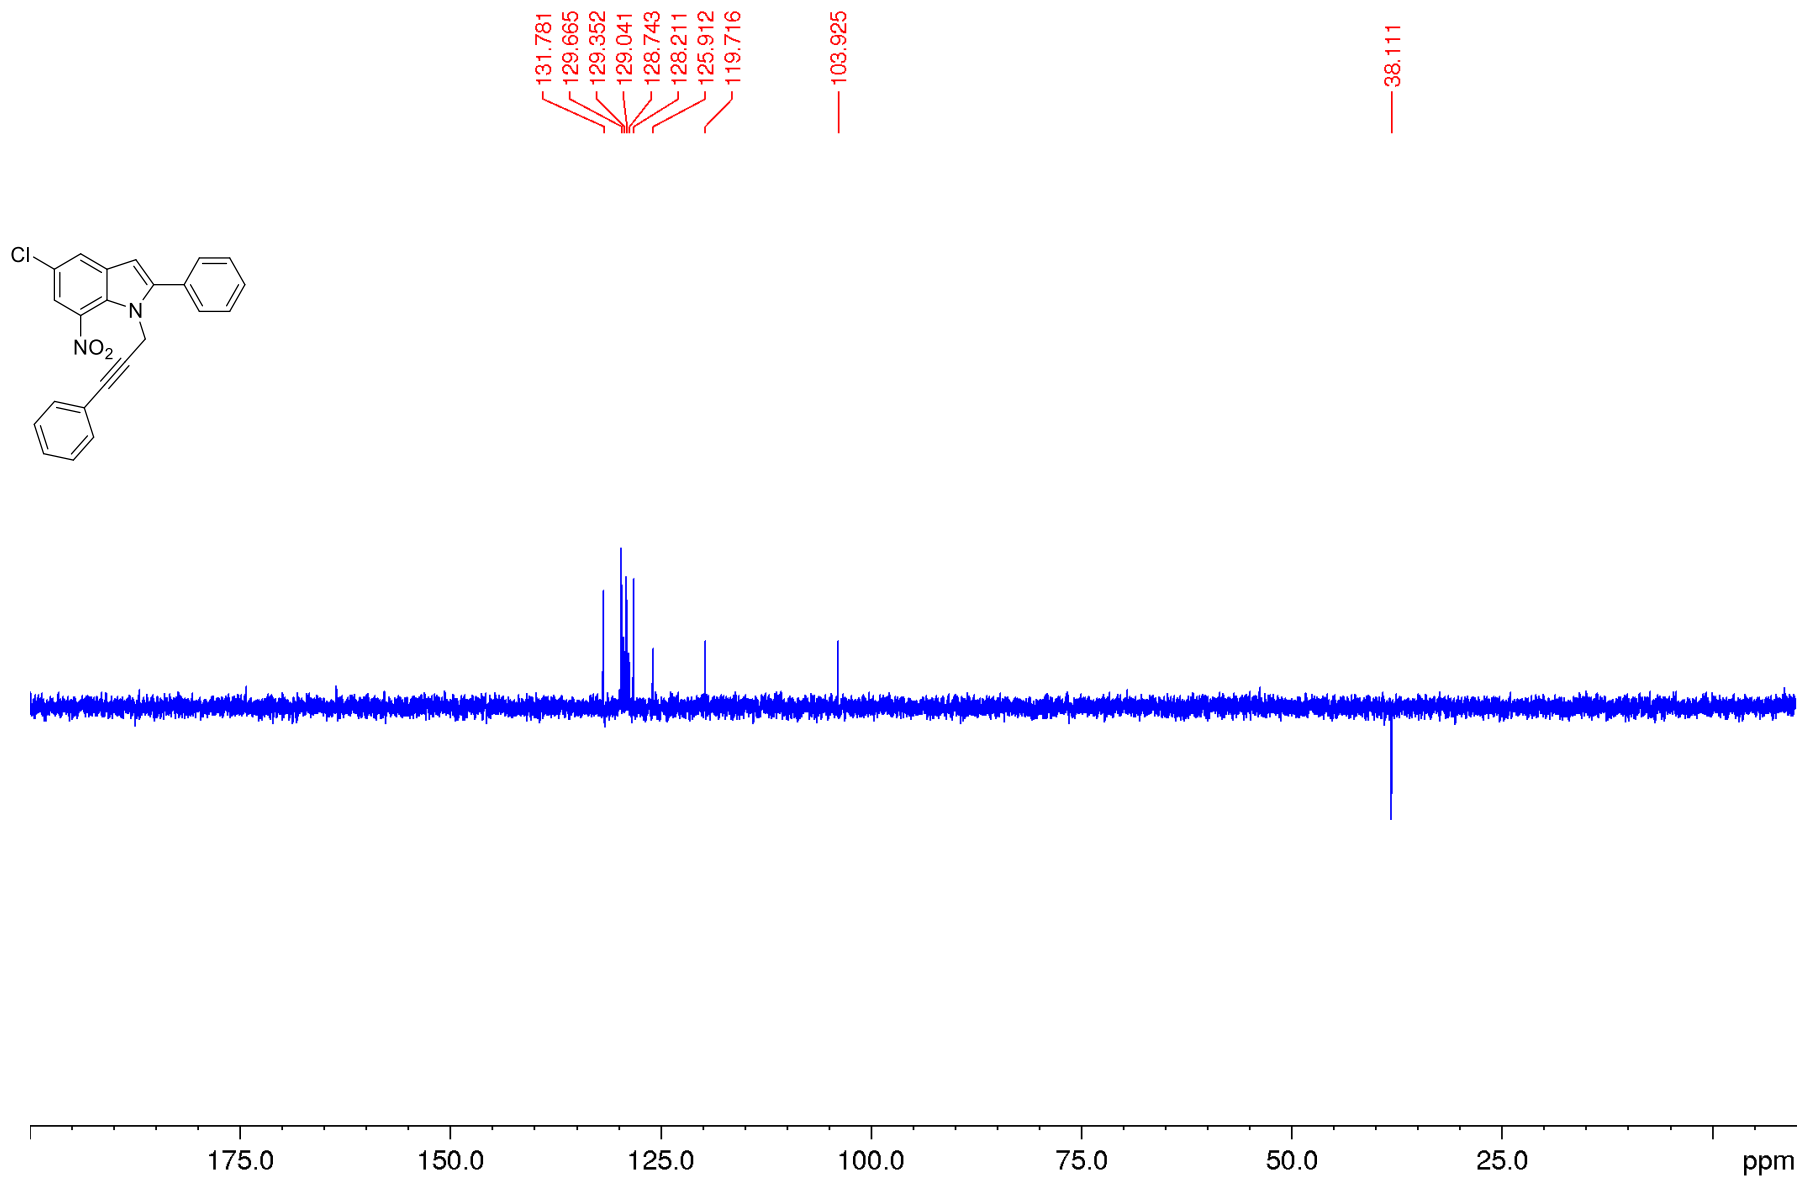

**5-chloro-1-(3-(4-chlorophenyl)prop-2-yn-1-yl)-7-nitro-2-phenyl-1H-indole 7b**

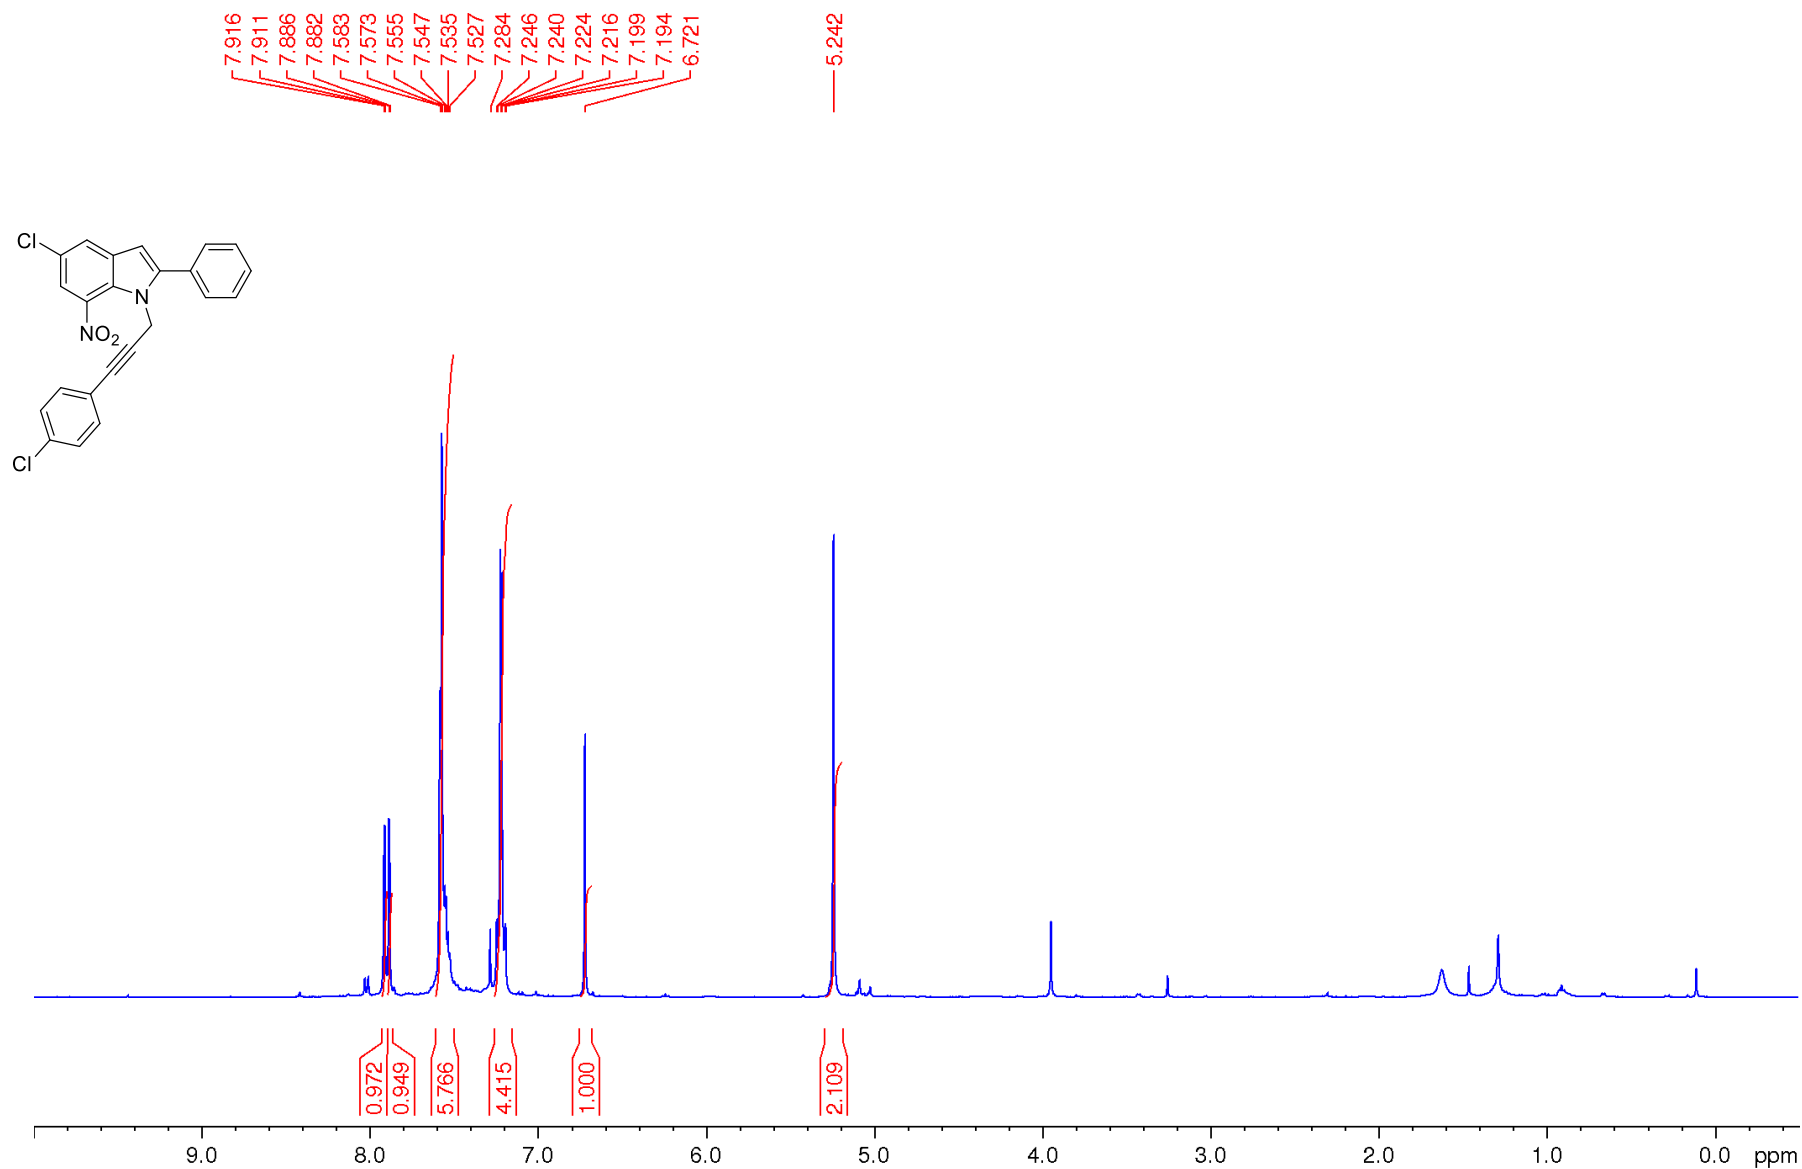

**5-chloro-1-(3-(4-chlorophenyl)prop-2-yn-1-yl)-7-nitro-2-phenyl-1*H*-indole 7b**

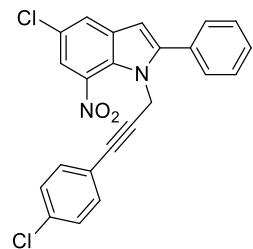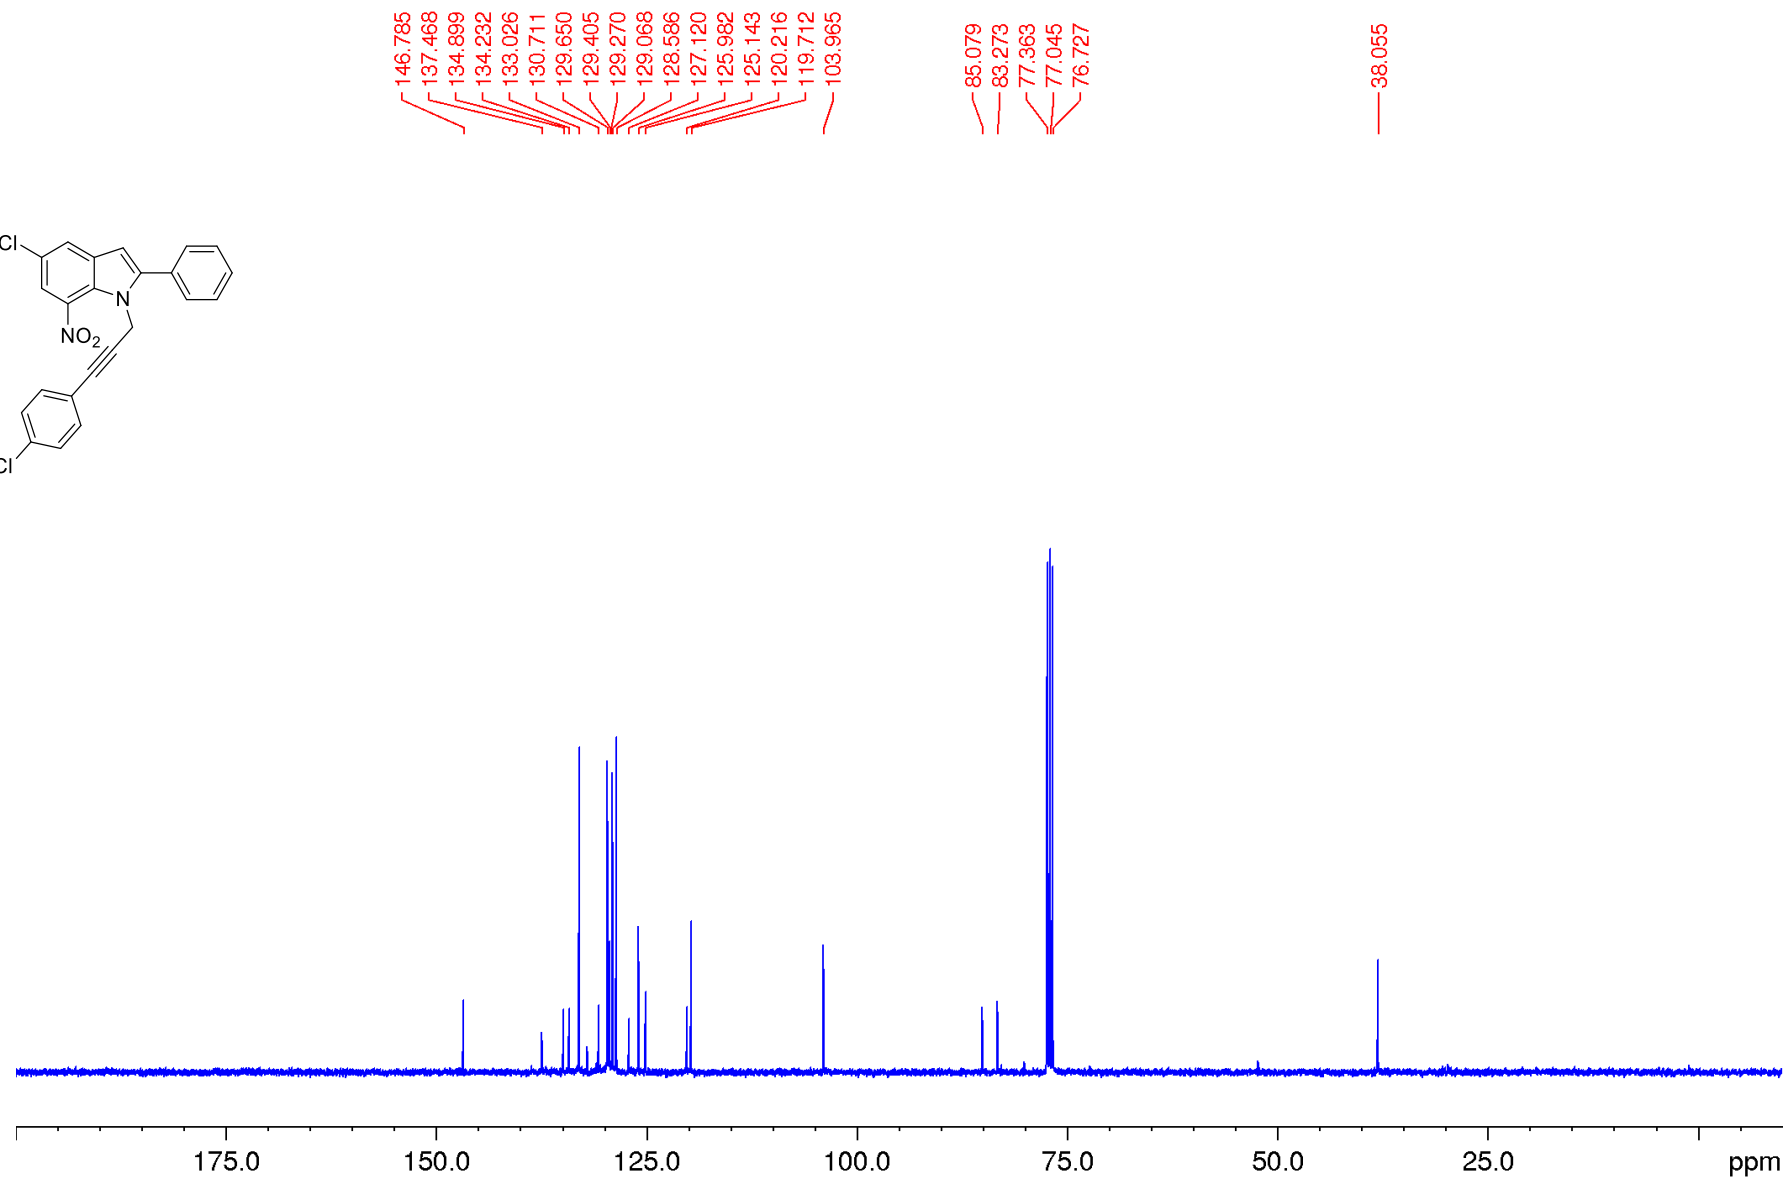

**5-chloro-1-(3-(4-chlorophenyl)prop-2-yn-1-yl)-7-nitro-2-phenyl-1*H*-indole 7b**

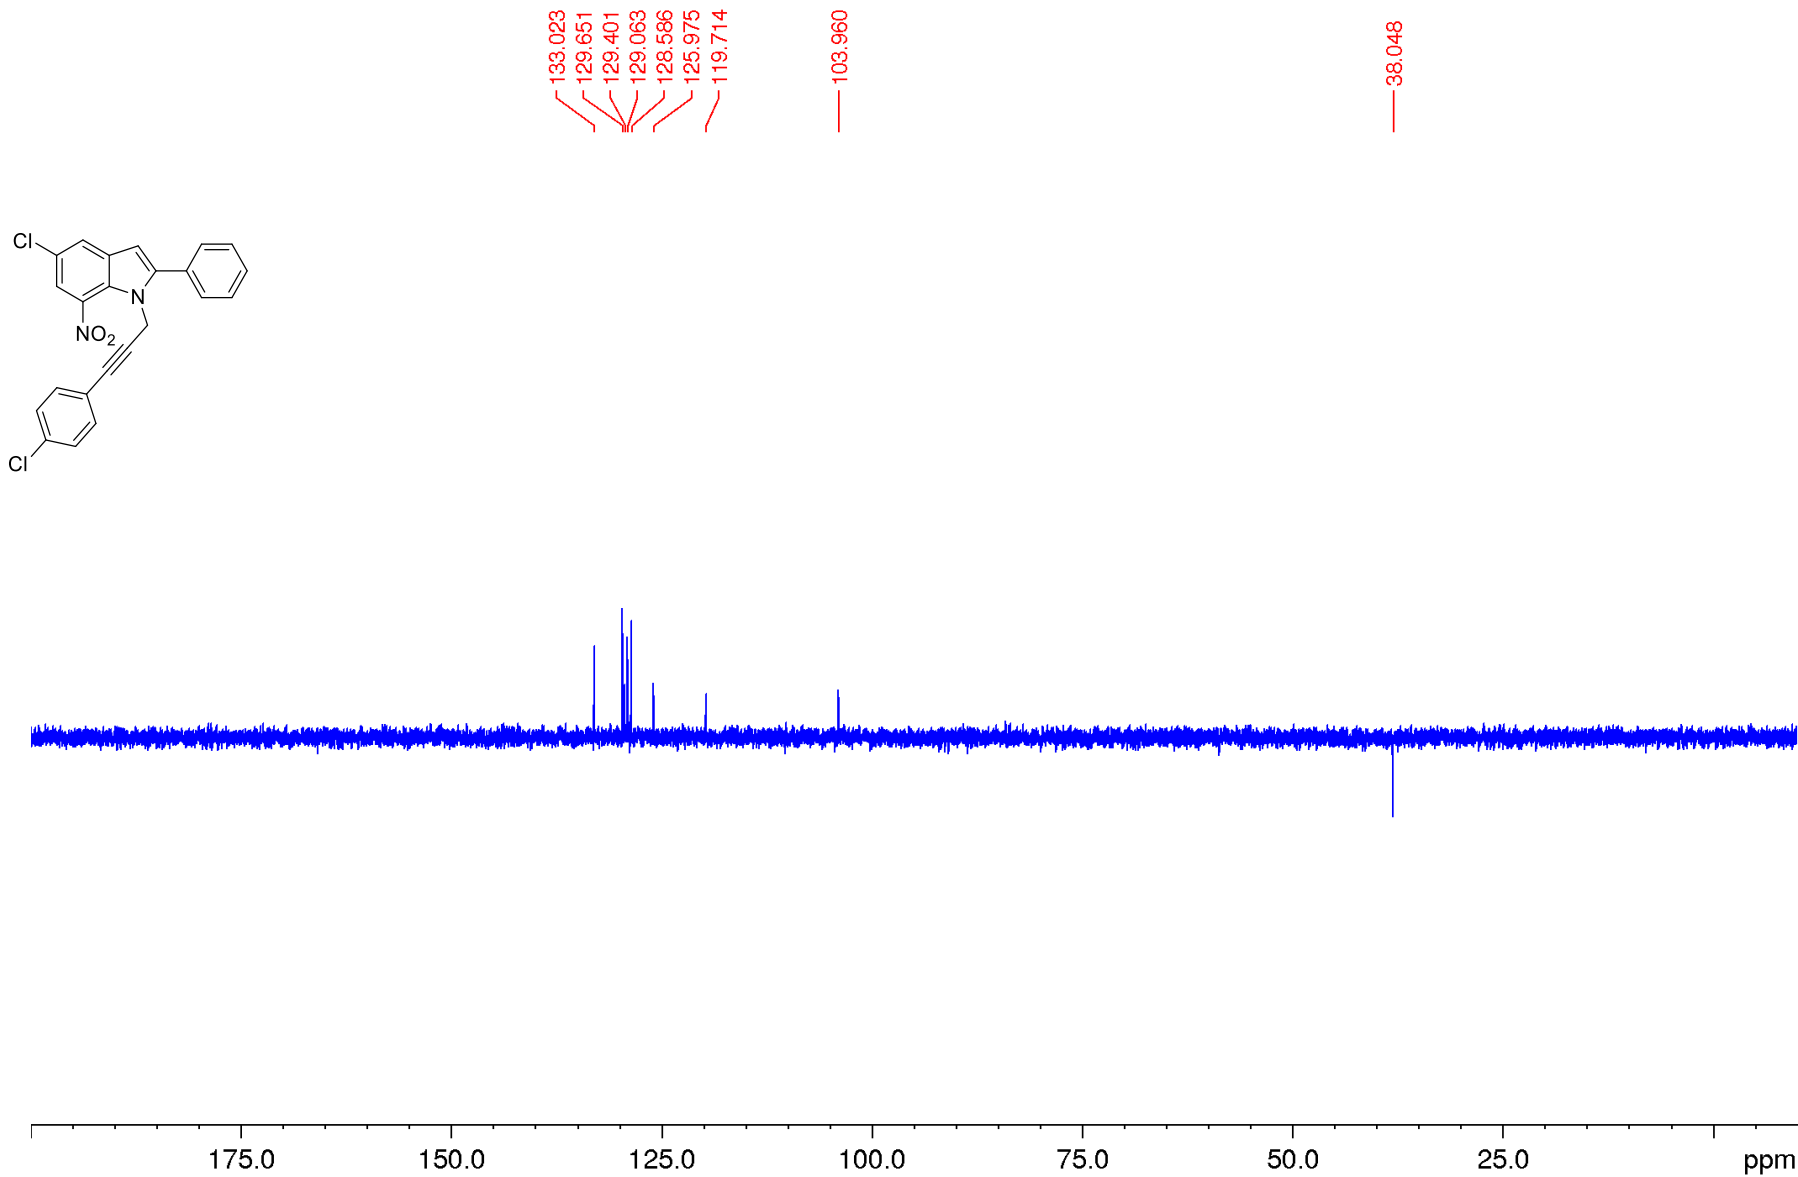

**5-chloro-1-(3-(4-methoxyphenyl)prop-2-yn-1-yl)-7-nitro-2-phenyl-1H-indole 7c**

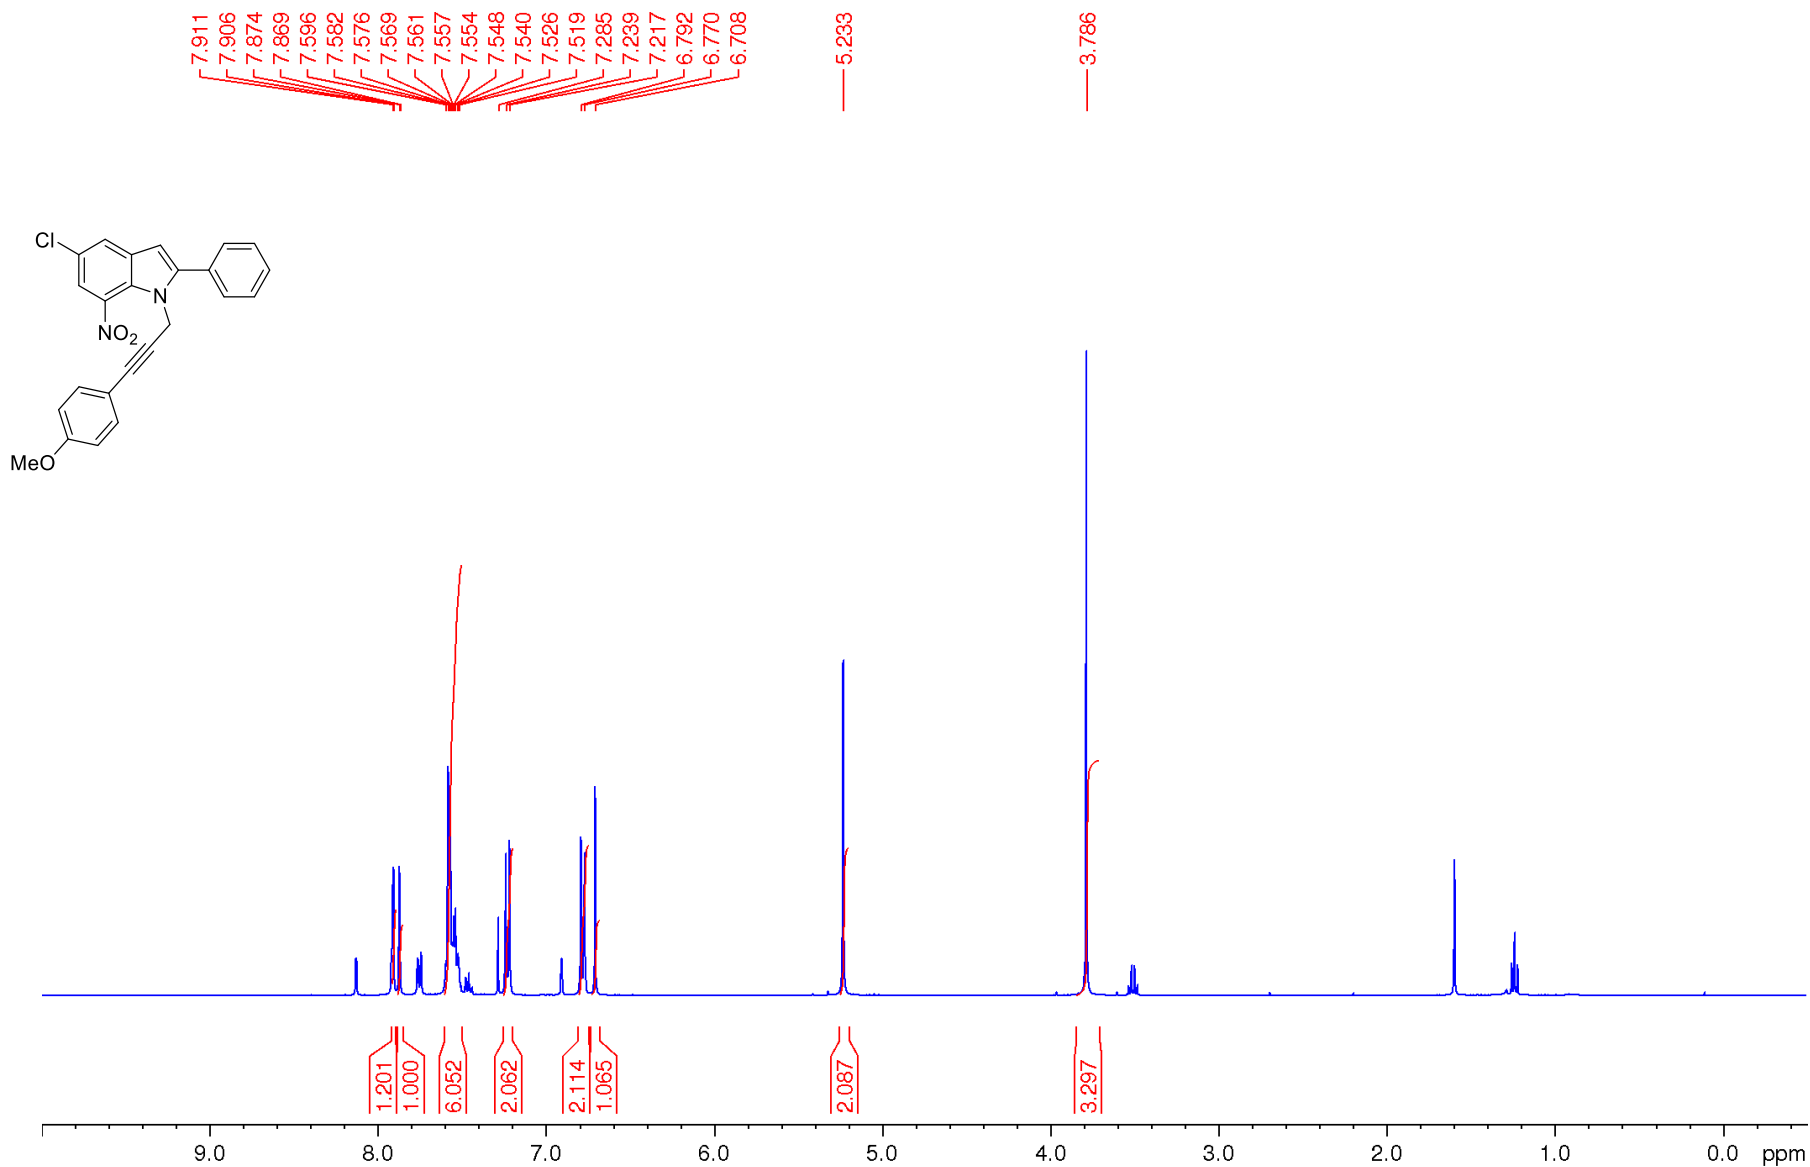



**5-chloro-1-(3-(4-methoxyphenyl)prop-2-yn-1-yl)-7-nitro-2-phenyl-1*H*-indole 7c**

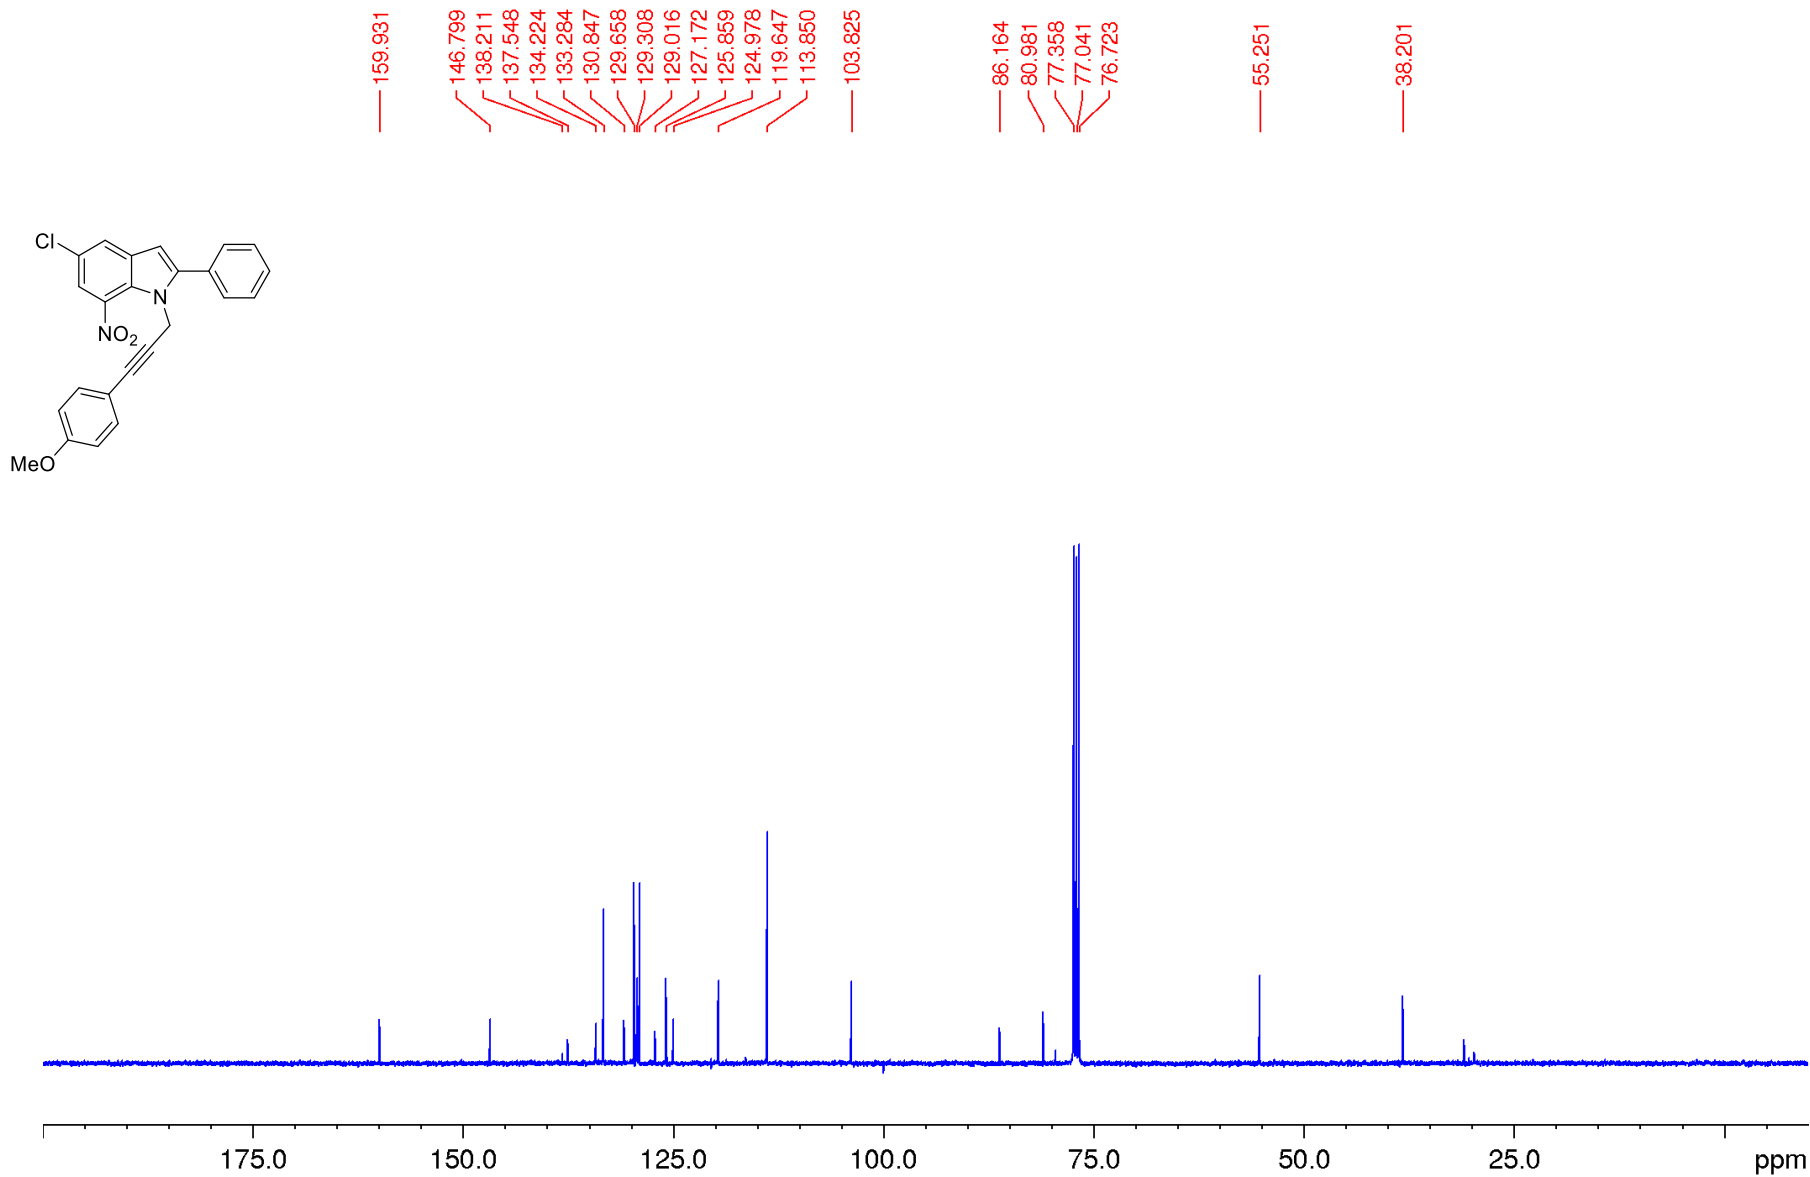

**5-chloro-1-(3-(4-methoxyphenyl)prop-2-yn-1-yl)-7-nitro-2-phenyl-1*H*-indole 7c**

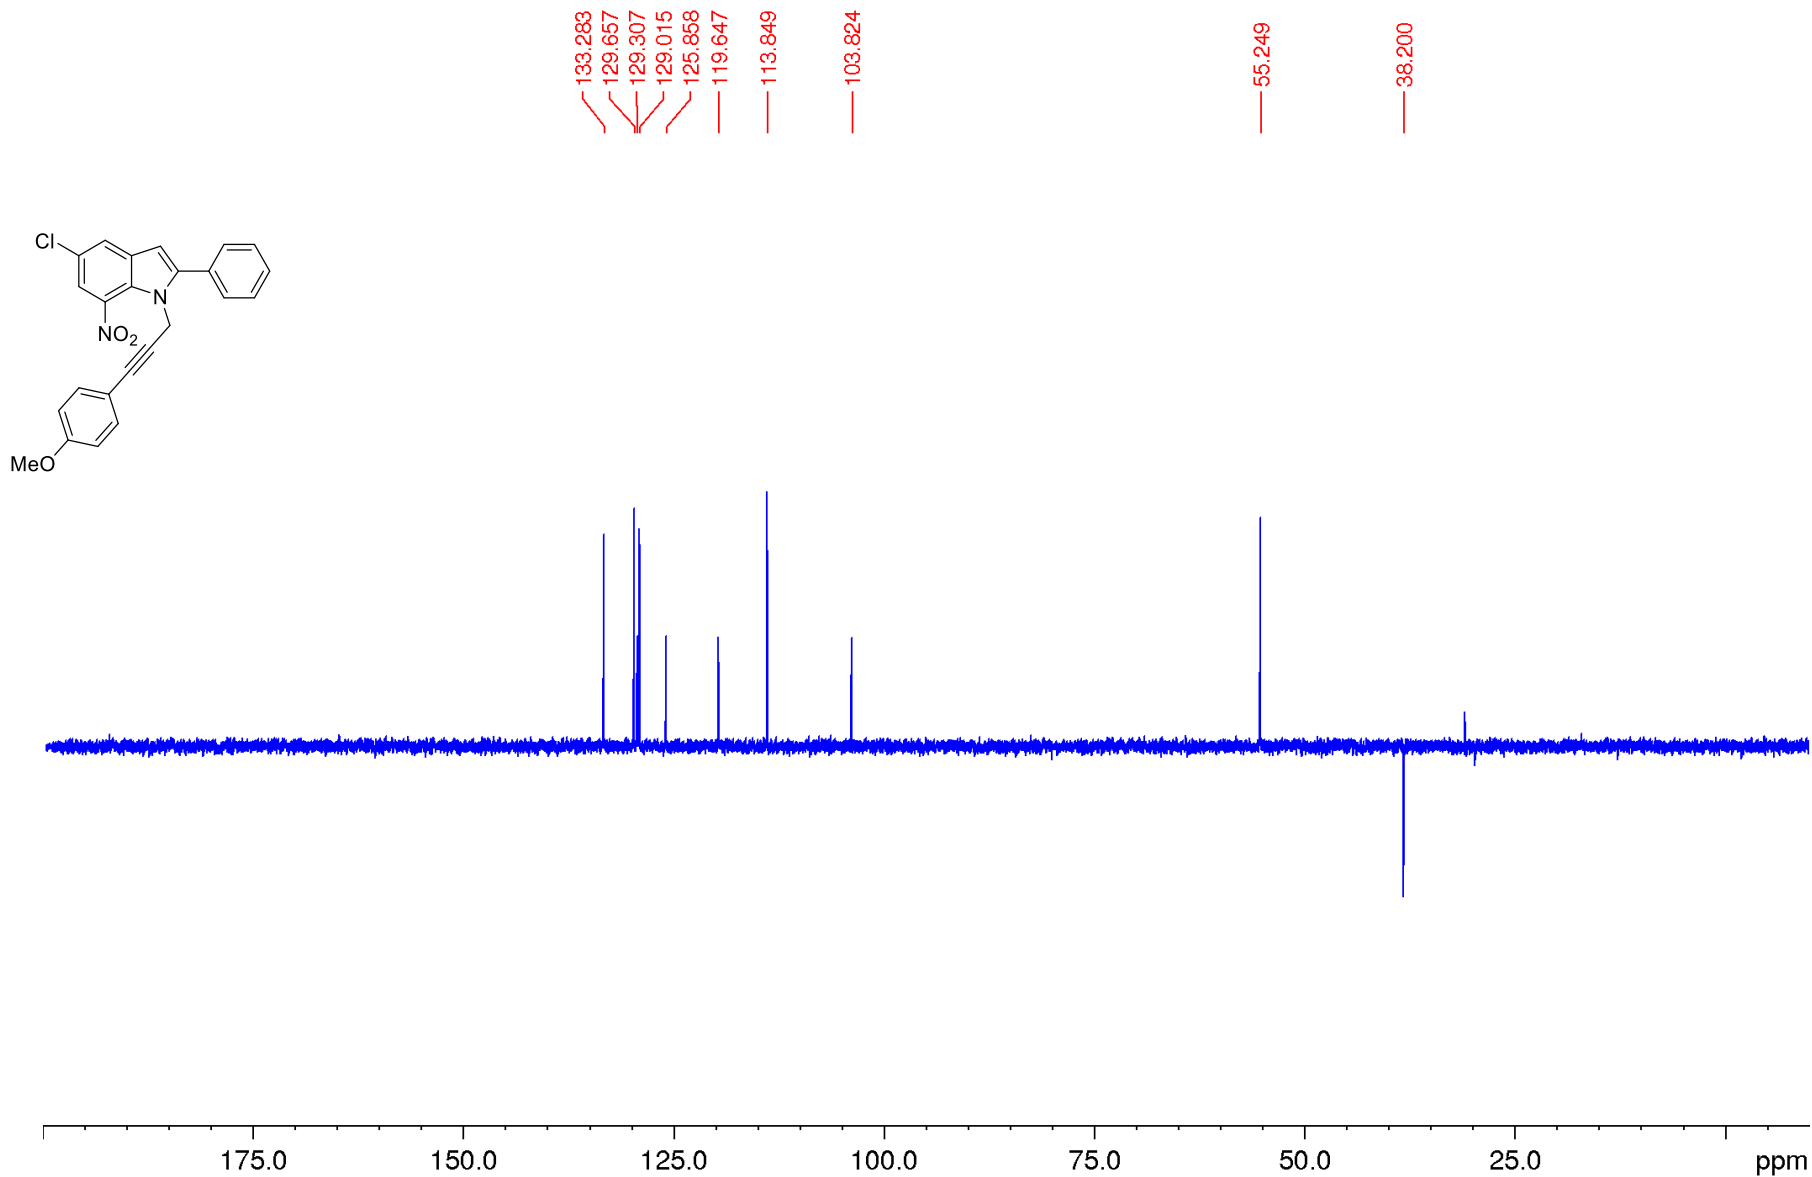

**1-(4-(3-(5-chloro-7-nitro-2-phenyl-1*H*-indol-1-yl)prop-1-yn-1-yl)phenyl)ethan-1-one 7d**

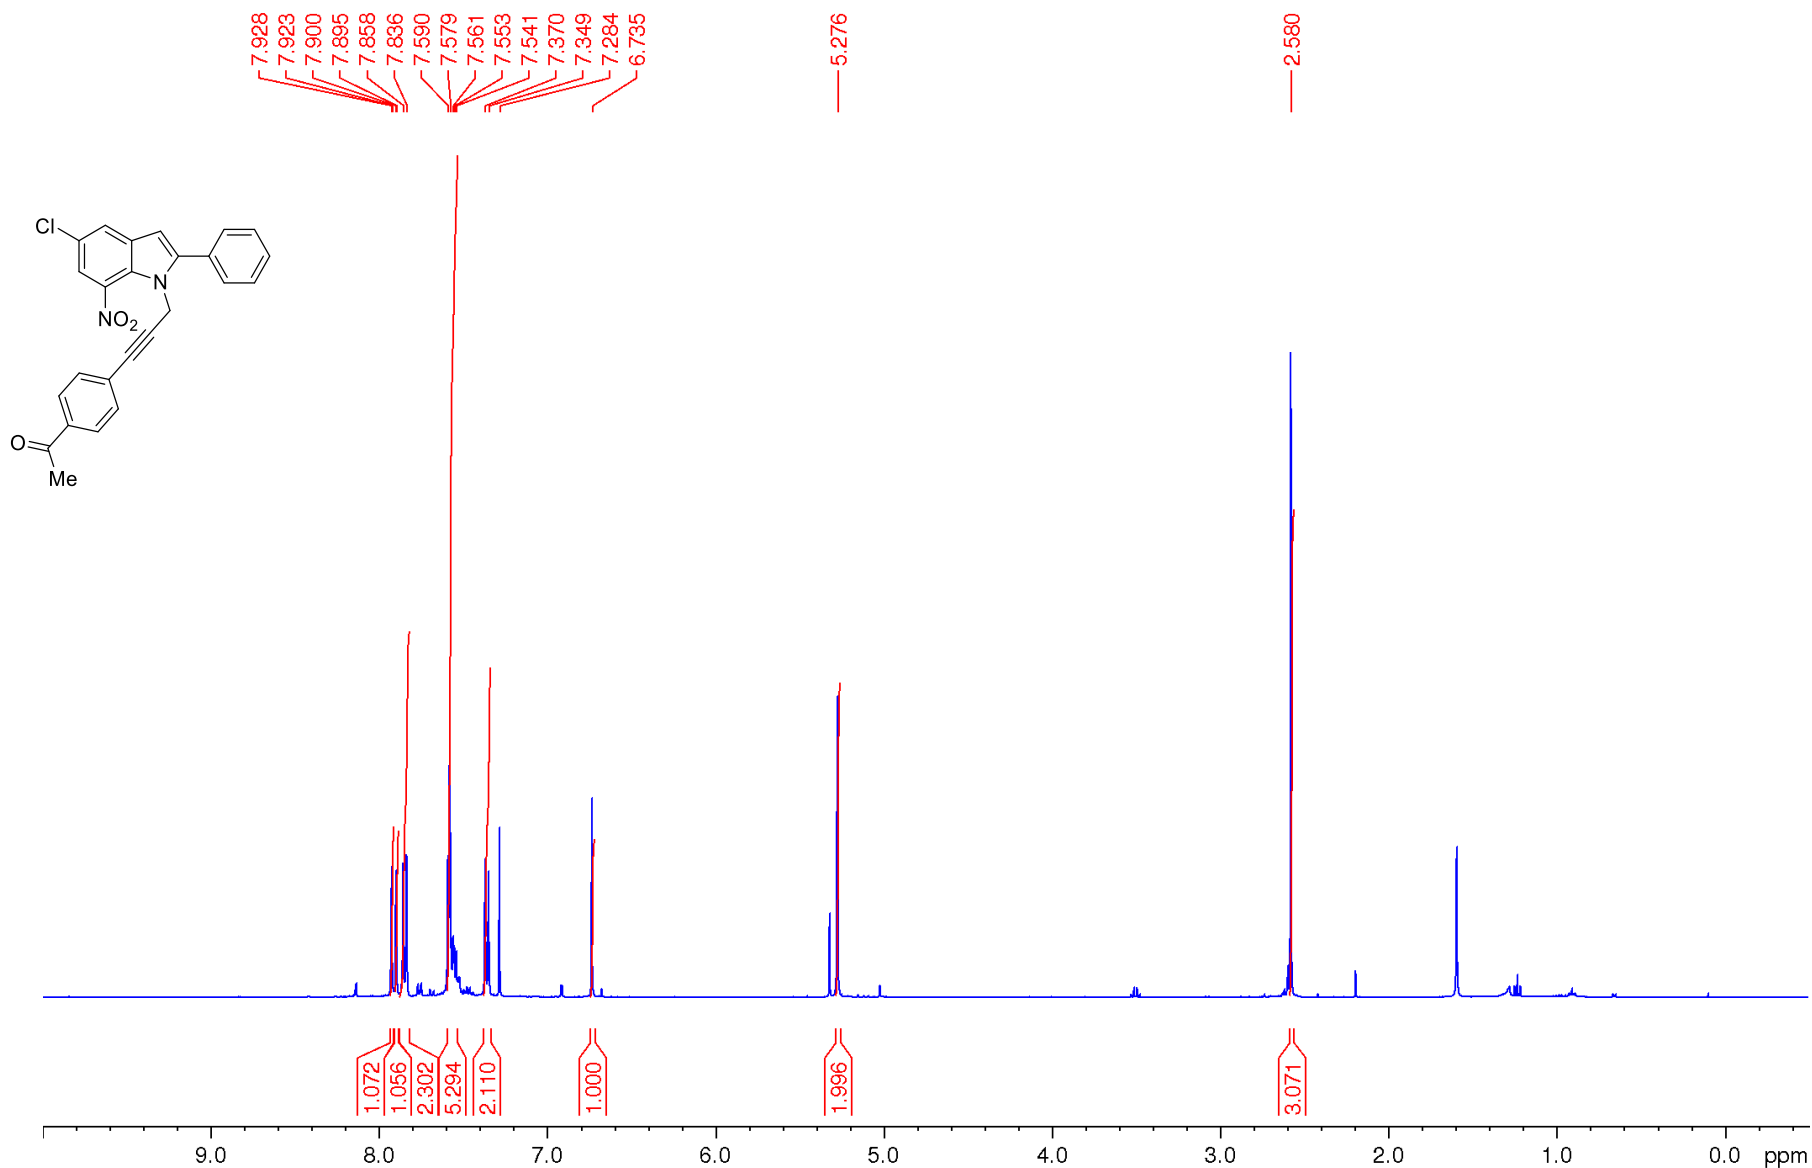

**1-(4-(3-(5-chloro-7-nitro-2-phenyl-1*H*-indol-1-yl)prop-1-yn-1-yl)phenyl)ethan-1-one 7d**

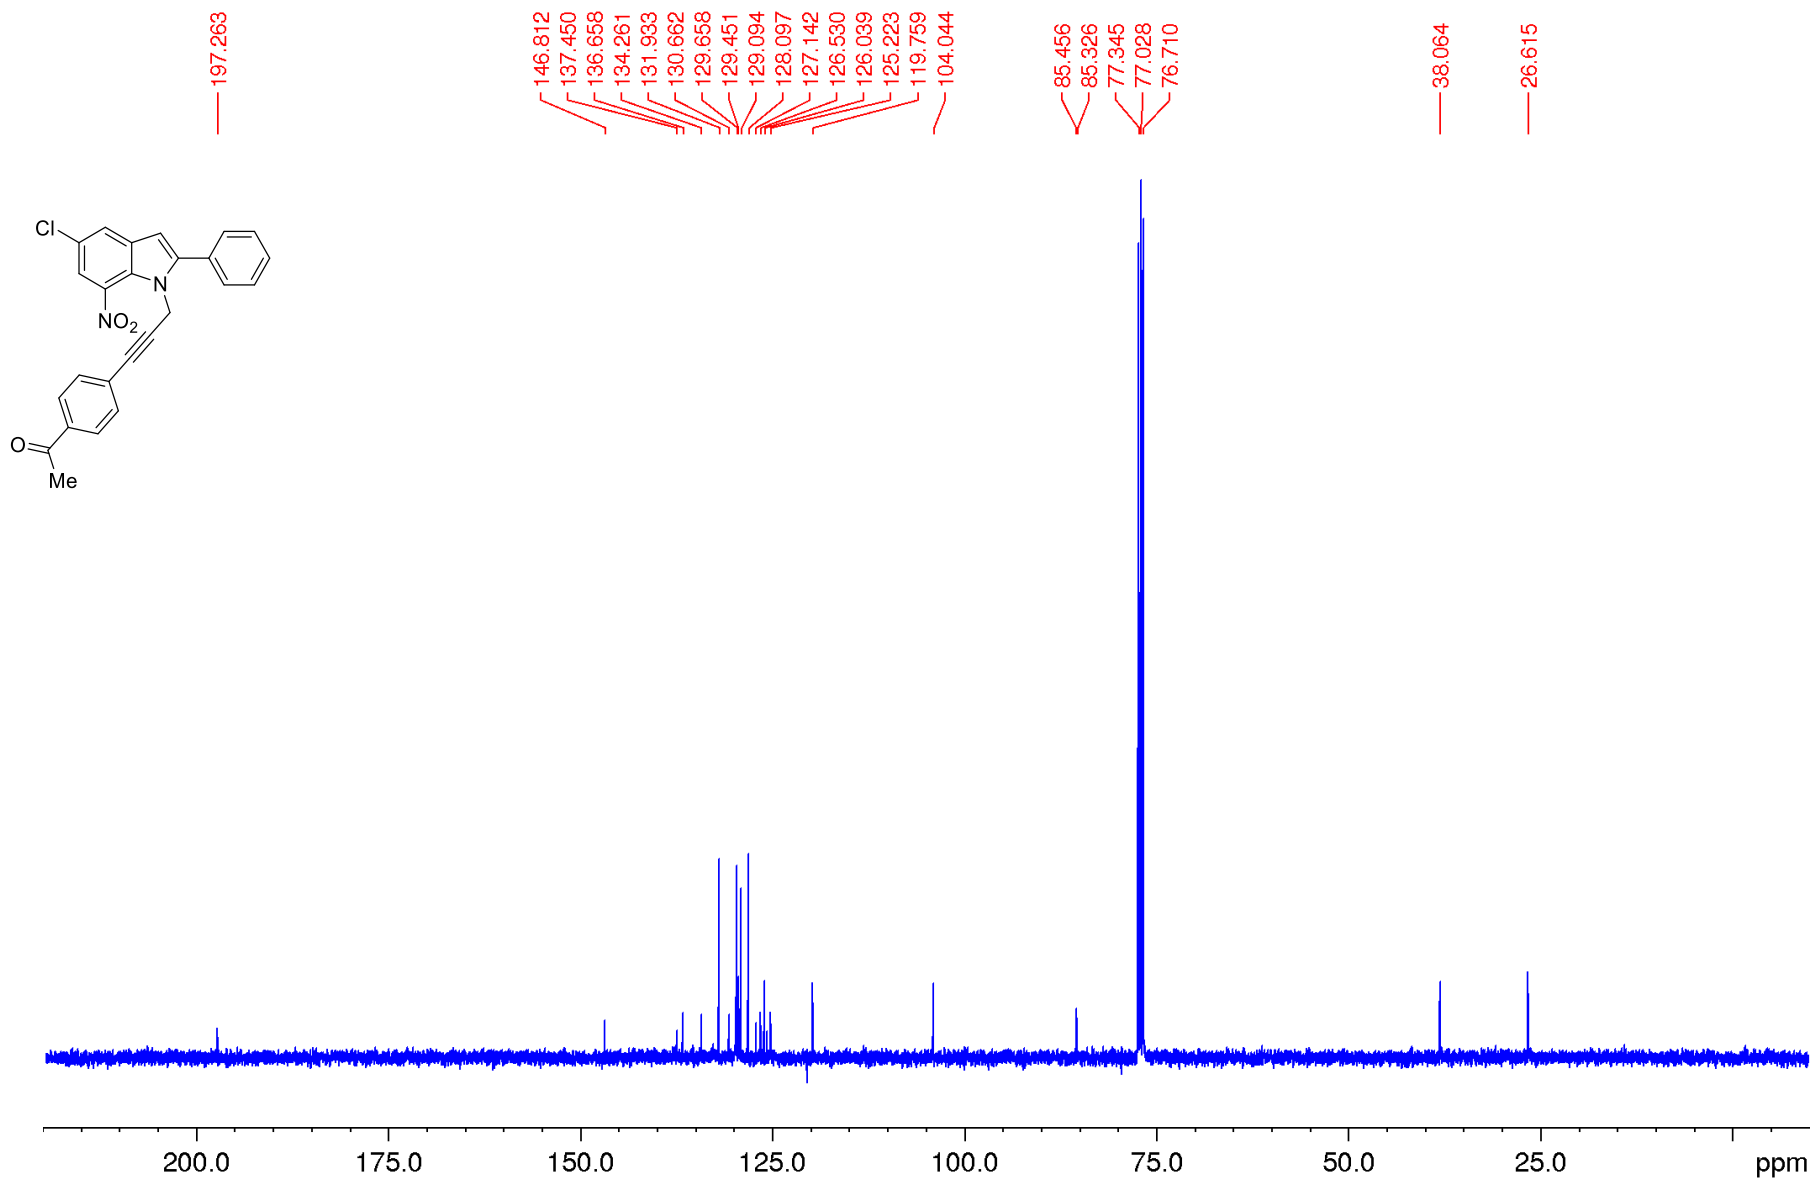

**1-(4-(3-(5-chloro-7-nitro-2-phenyl-1*H*-indol-1-yl)prop-1-yn-1-yl)phenyl)ethan-1-one 7d**

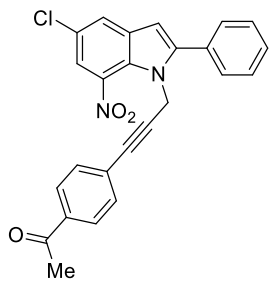

131.932  
129.657  
129.448  
129.091  
128.096  
126.035  
119.757

104.042

38.077

26.623

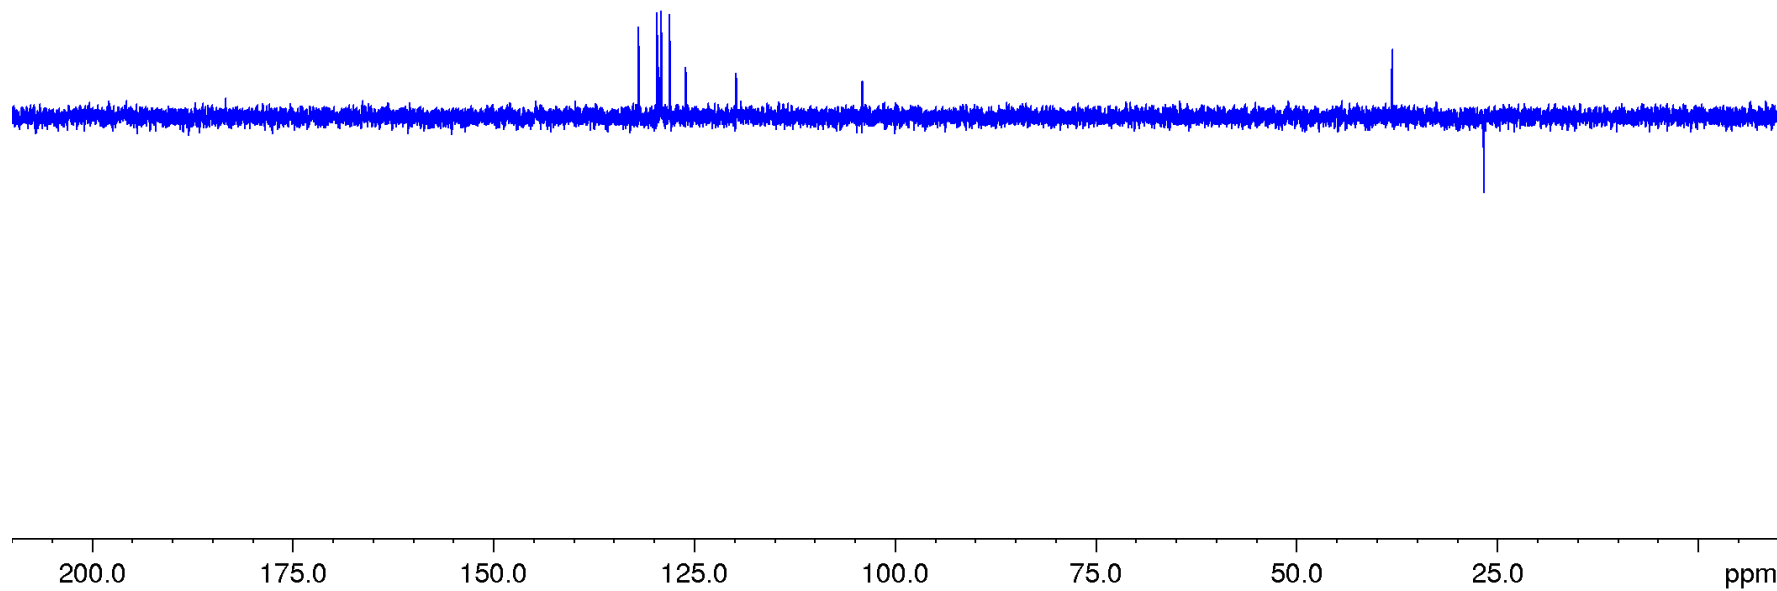

**5-chloro-2-(4-methoxyphenyl)-7-nitro-1-(3-(3-(trifluoromethyl)phenyl)prop-2-yn-1-yl)-1H-indole 7e**

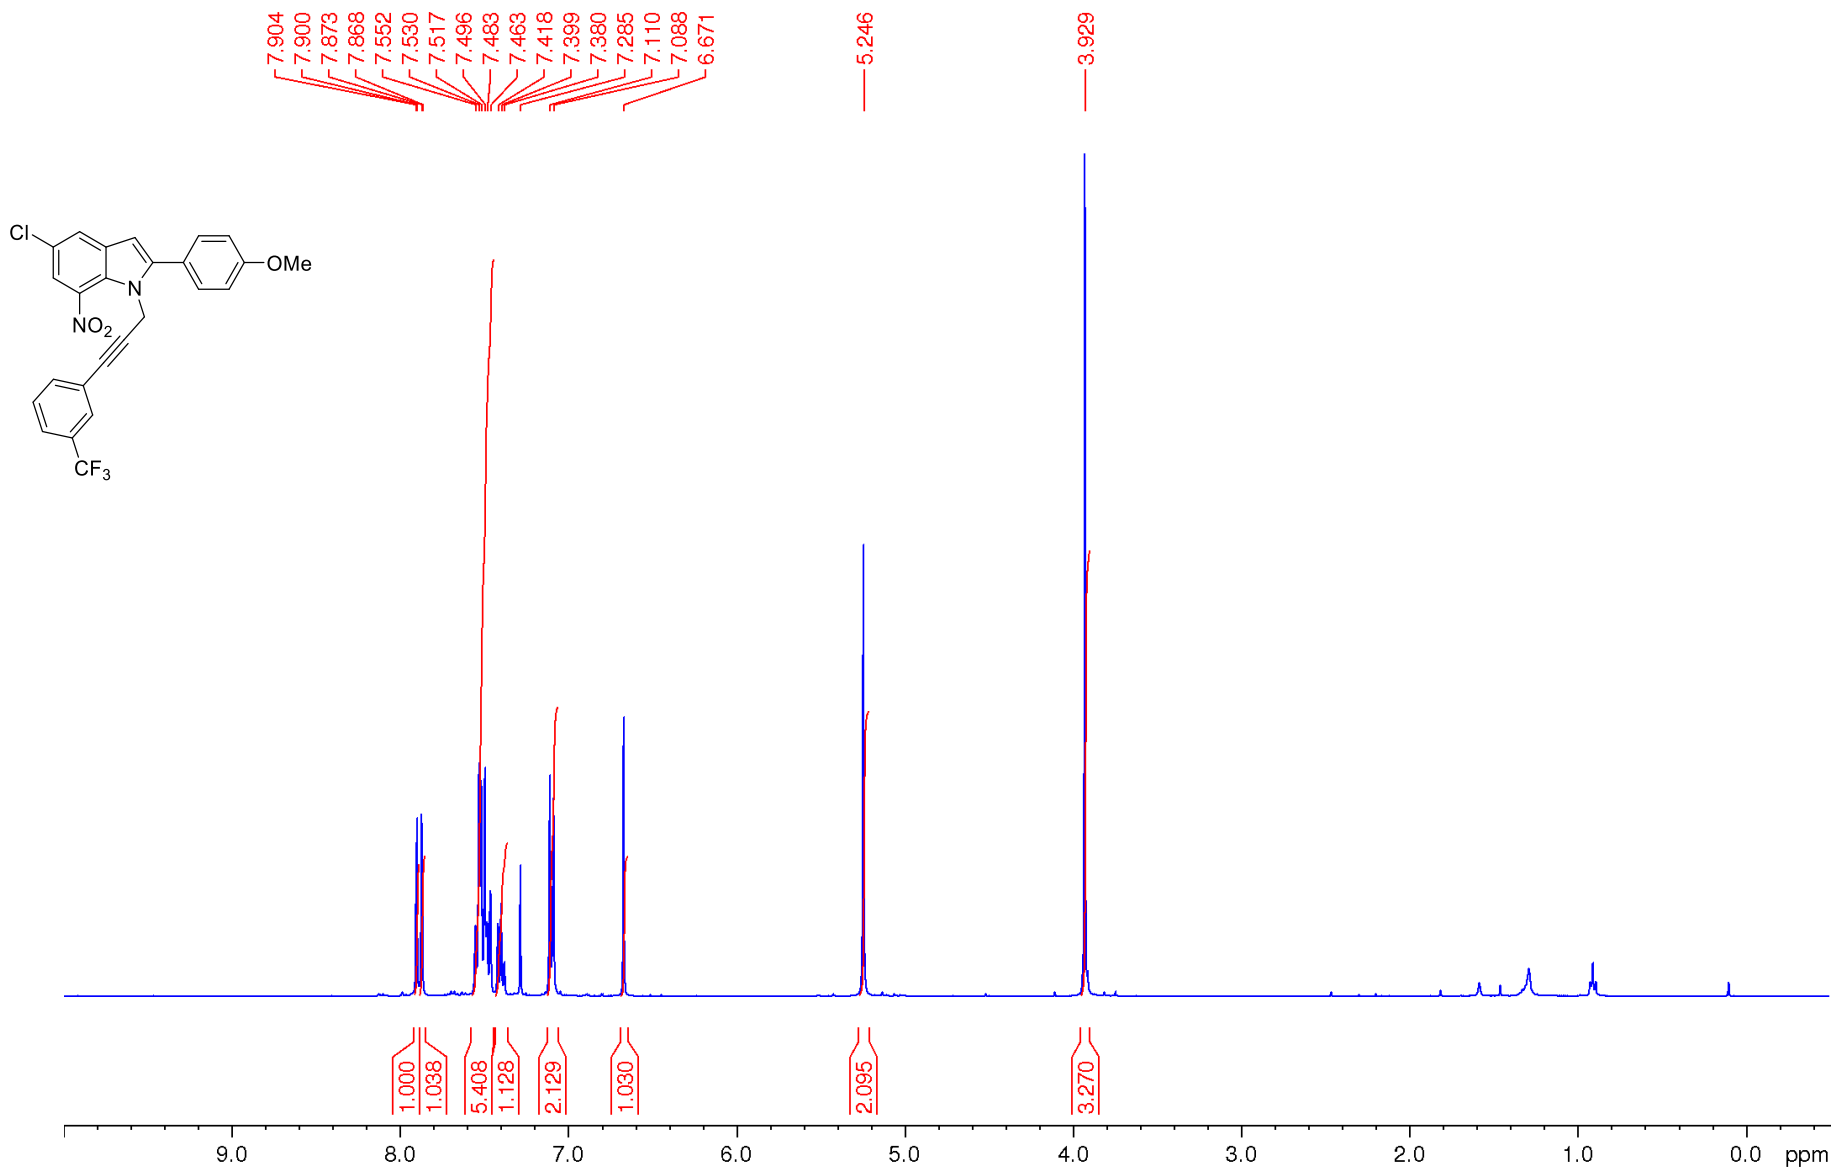

**5-chloro-2-(4-methoxyphenyl)-7-nitro-1-(3-(3-(trifluoromethyl)phenyl)prop-2-yn-1-yl)-1*H*-indole 7e**

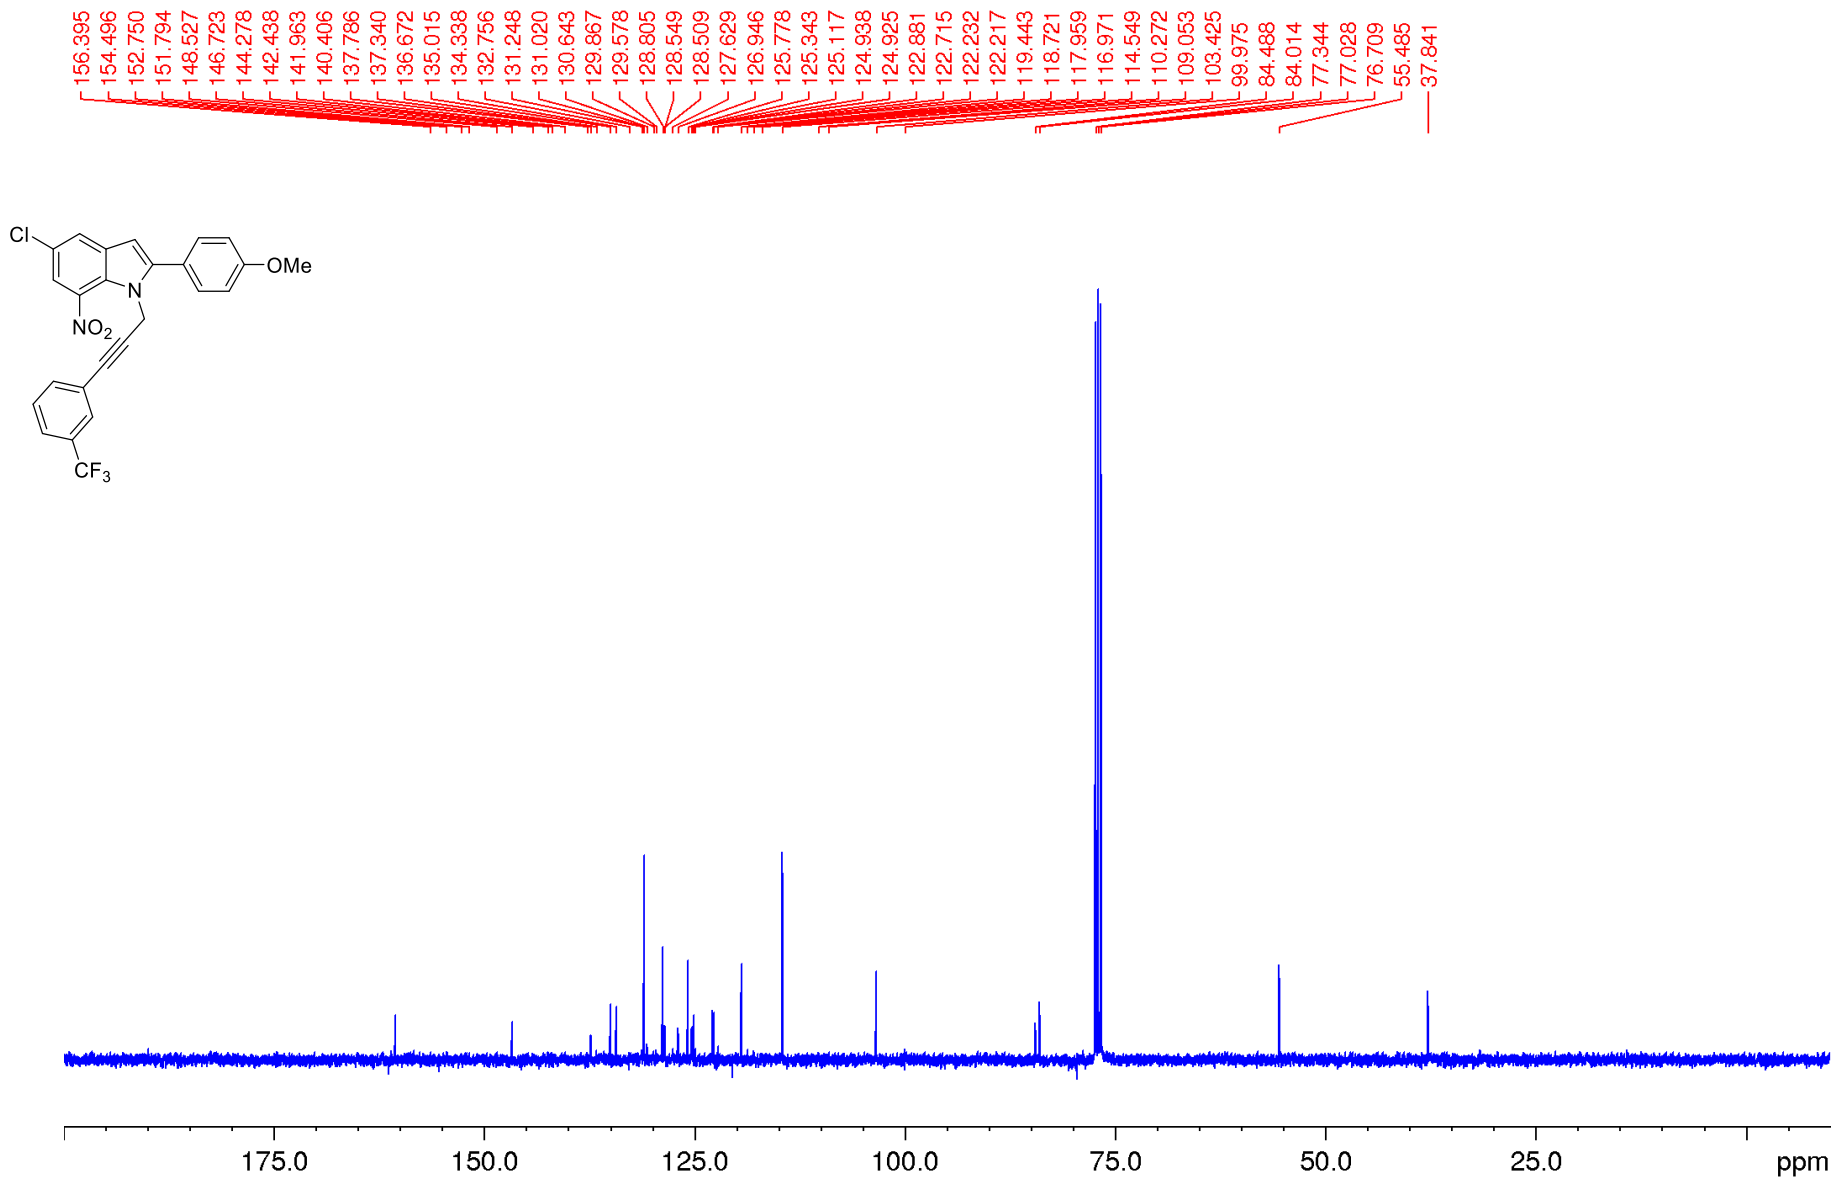

**5-chloro-2-(4-methoxyphenyl)-7-nitro-1-(3-(3-(trifluoromethyl)phenyl)prop-2-yn-1-yl)-1H-indole 7e**

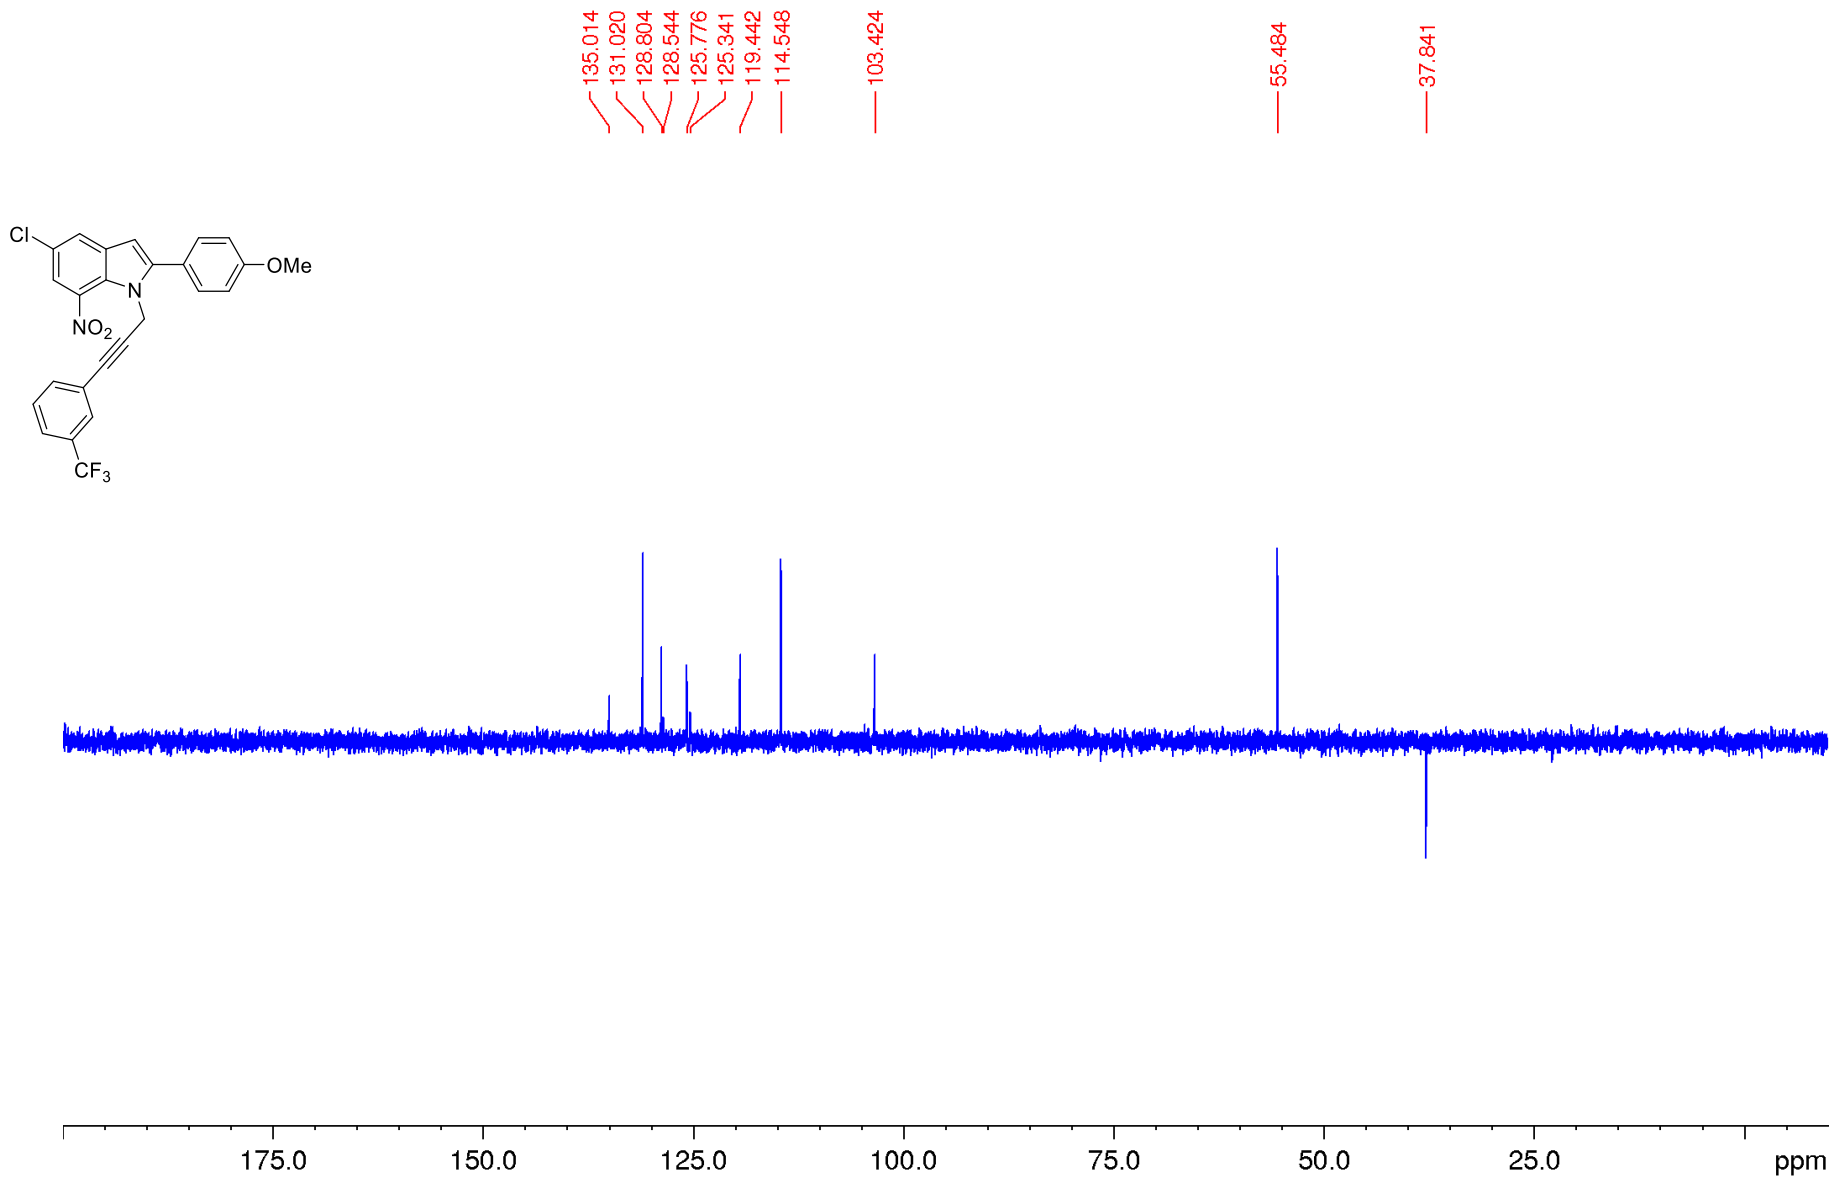



**5-chloro-2-(4-methoxyphenyl)-7-nitro-1-(3-(3-(trifluoromethyl)phenyl)prop-2-yn-1-yl)-1*H*-indole 7e**

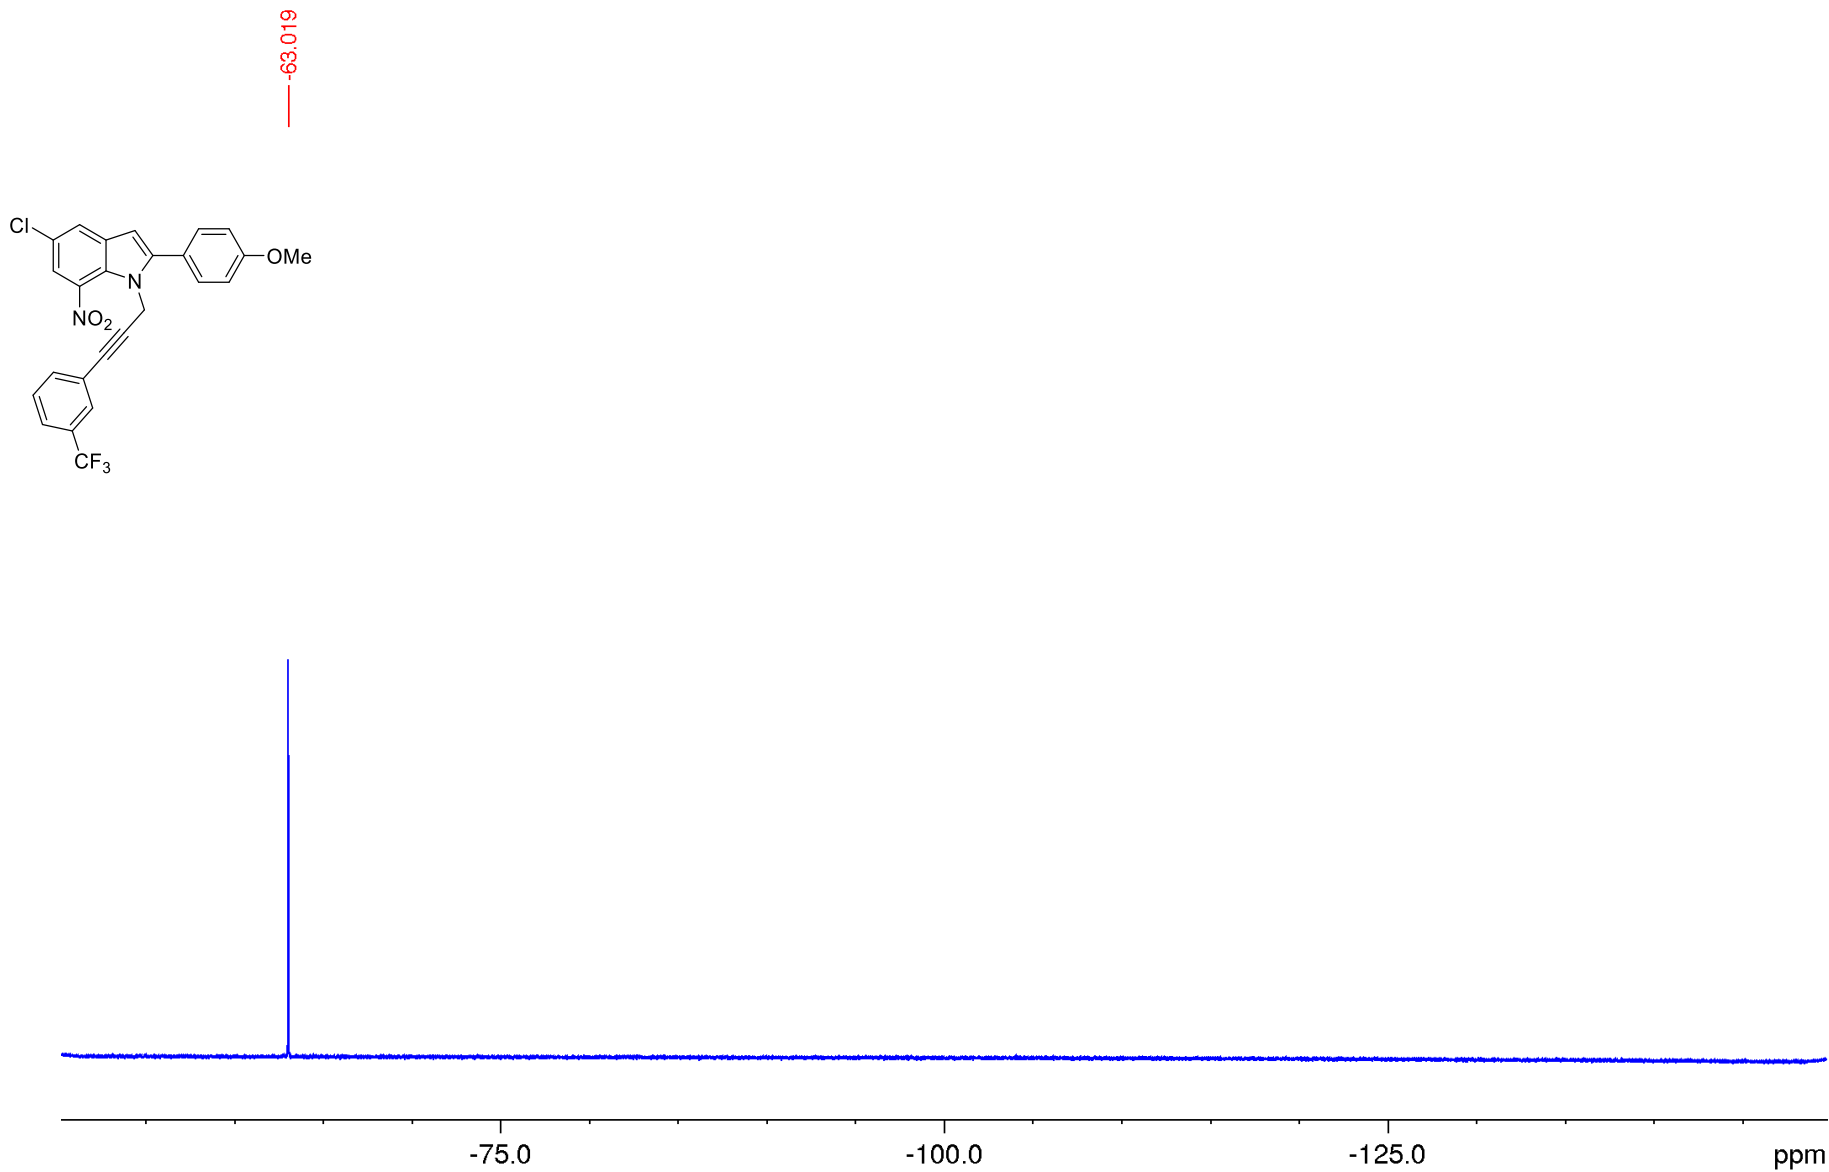

**5-chloro-2-(4-methoxyphenyl)-1-(3-(4-methoxyphenyl)prop-2-yn-1-yl)-7-nitro-1*H*-indole 7f**

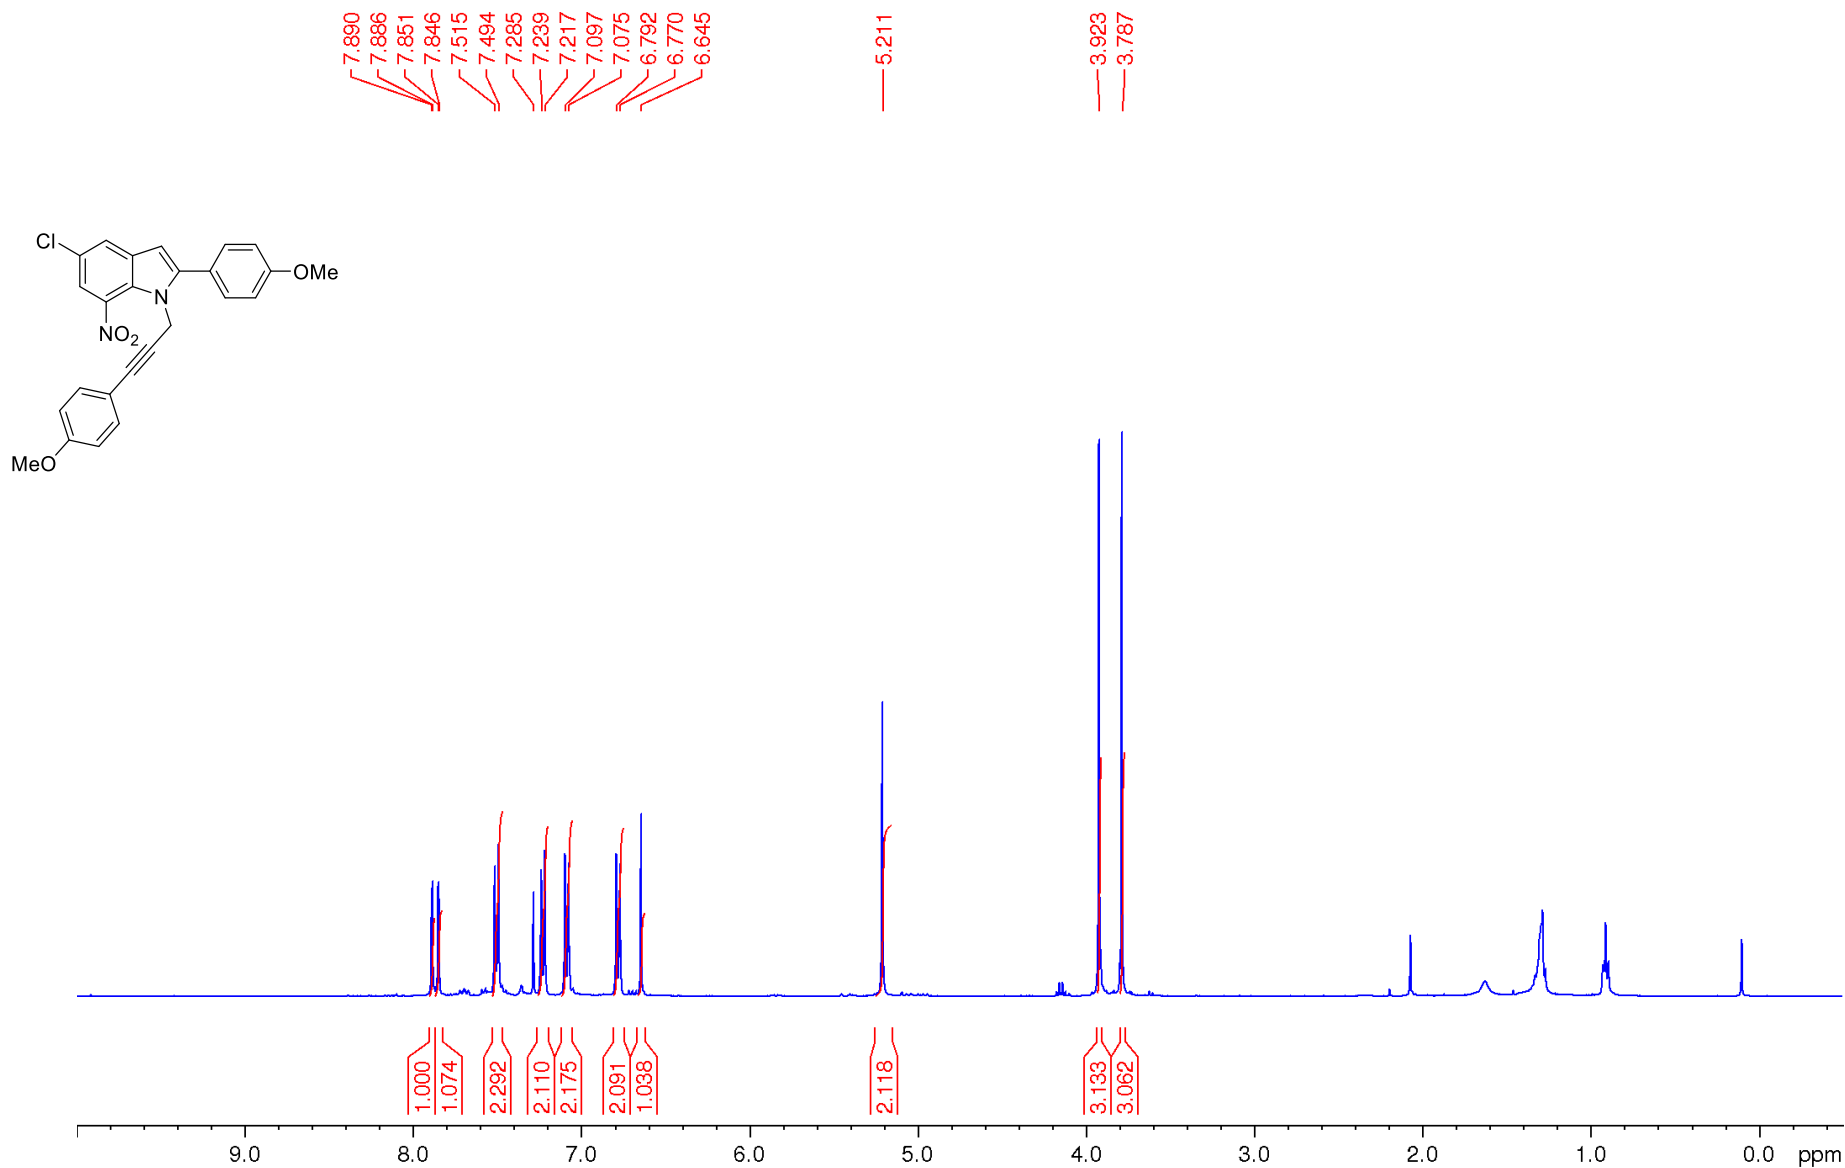

**5-chloro-2-(4-methoxyphenyl)-1-(3-(4-methoxyphenyl)prop-2-yn-1-yl)-7-nitro-1*H*-indole 7f**

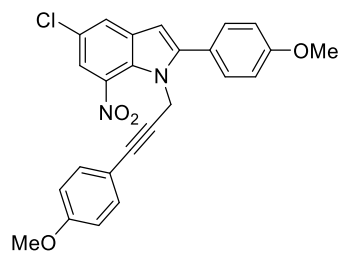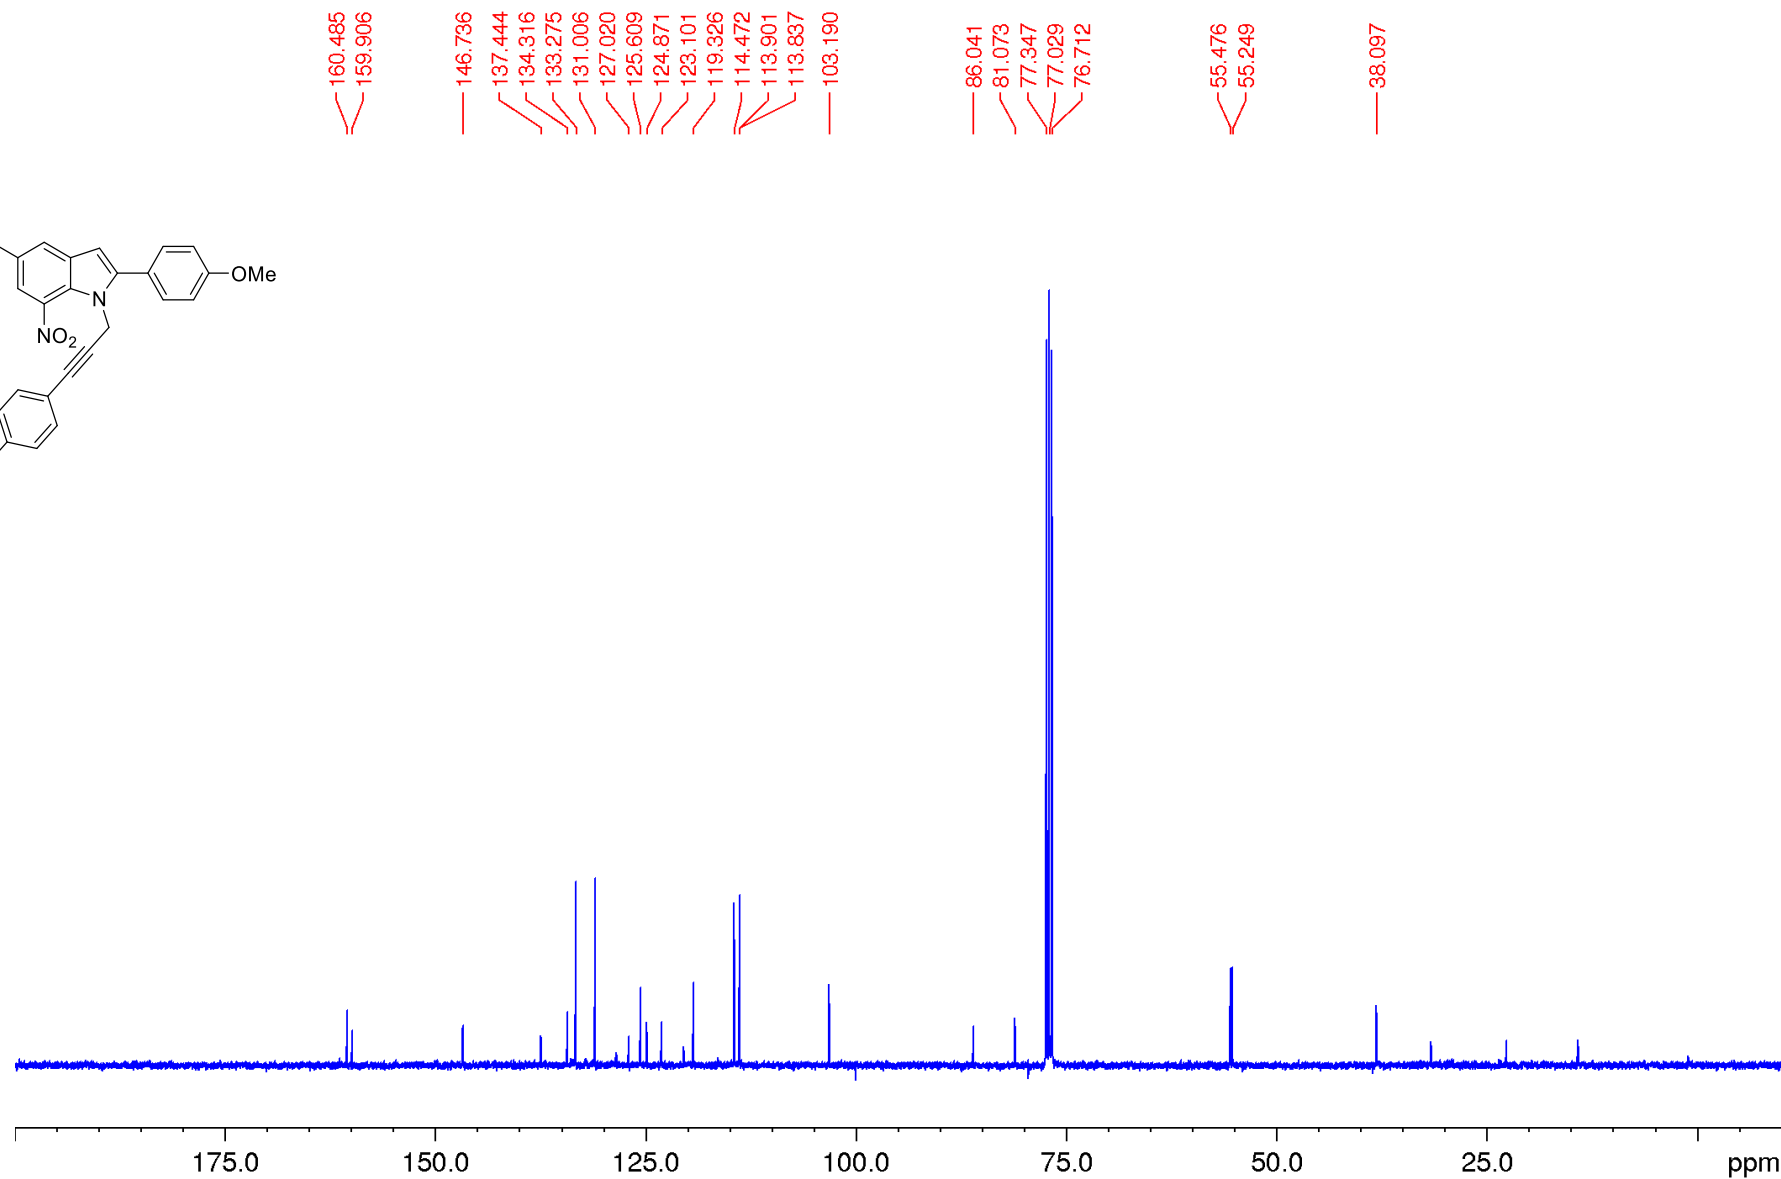

**5-chloro-2-(4-methoxyphenyl)-1-(3-(4-methoxyphenyl)prop-2-yn-1-yl)-7-nitro-1*H*-indole 7f**



133.274  
131.005  
125.606  
119.325  
114.470  
113.836  
103.190  
55.474  
55.246  
38.095

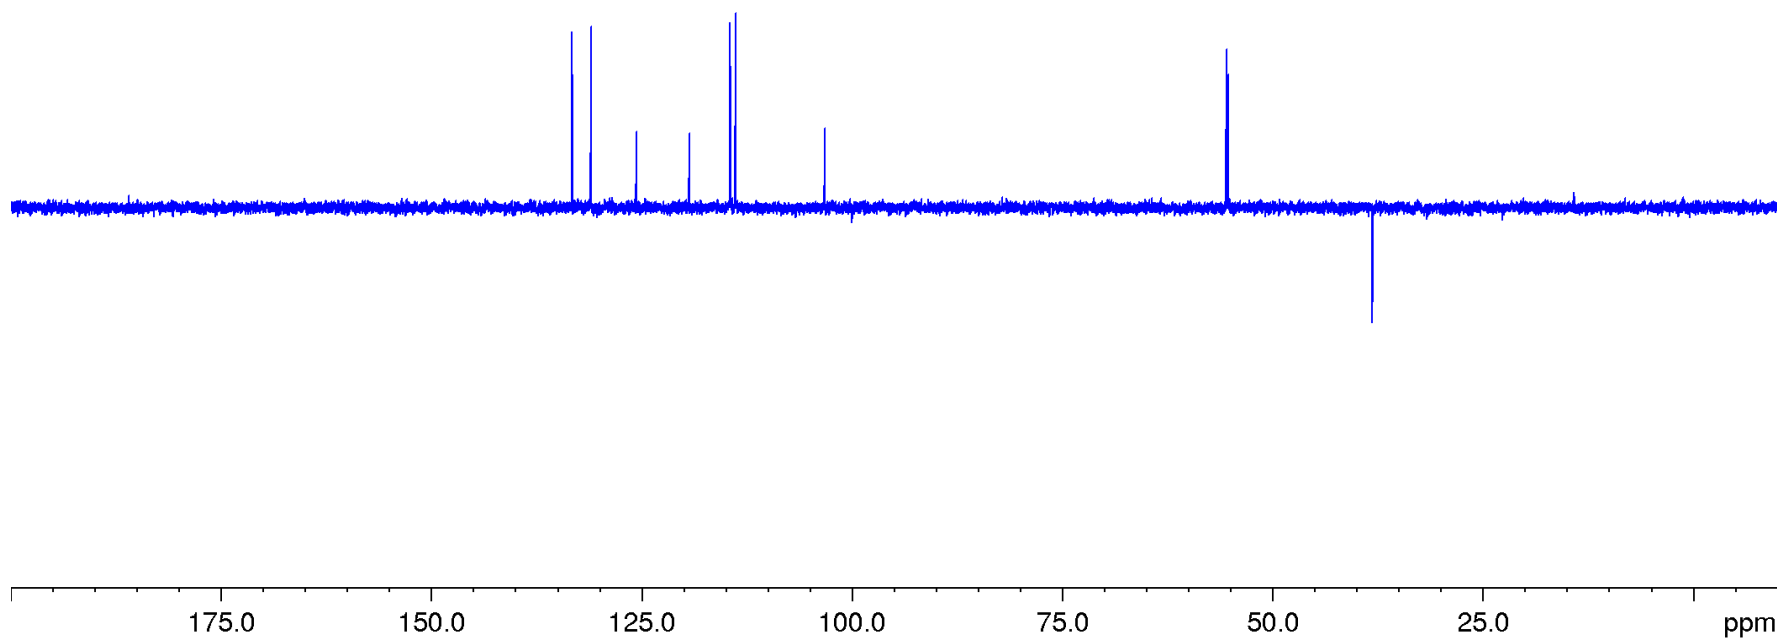

**1-(4-(3-(5-methyl-7-nitro-2-phenyl-1*H*-indol-1-yl)prop-1-yn-1-yl)phenyl)ethan-1-one 7g**

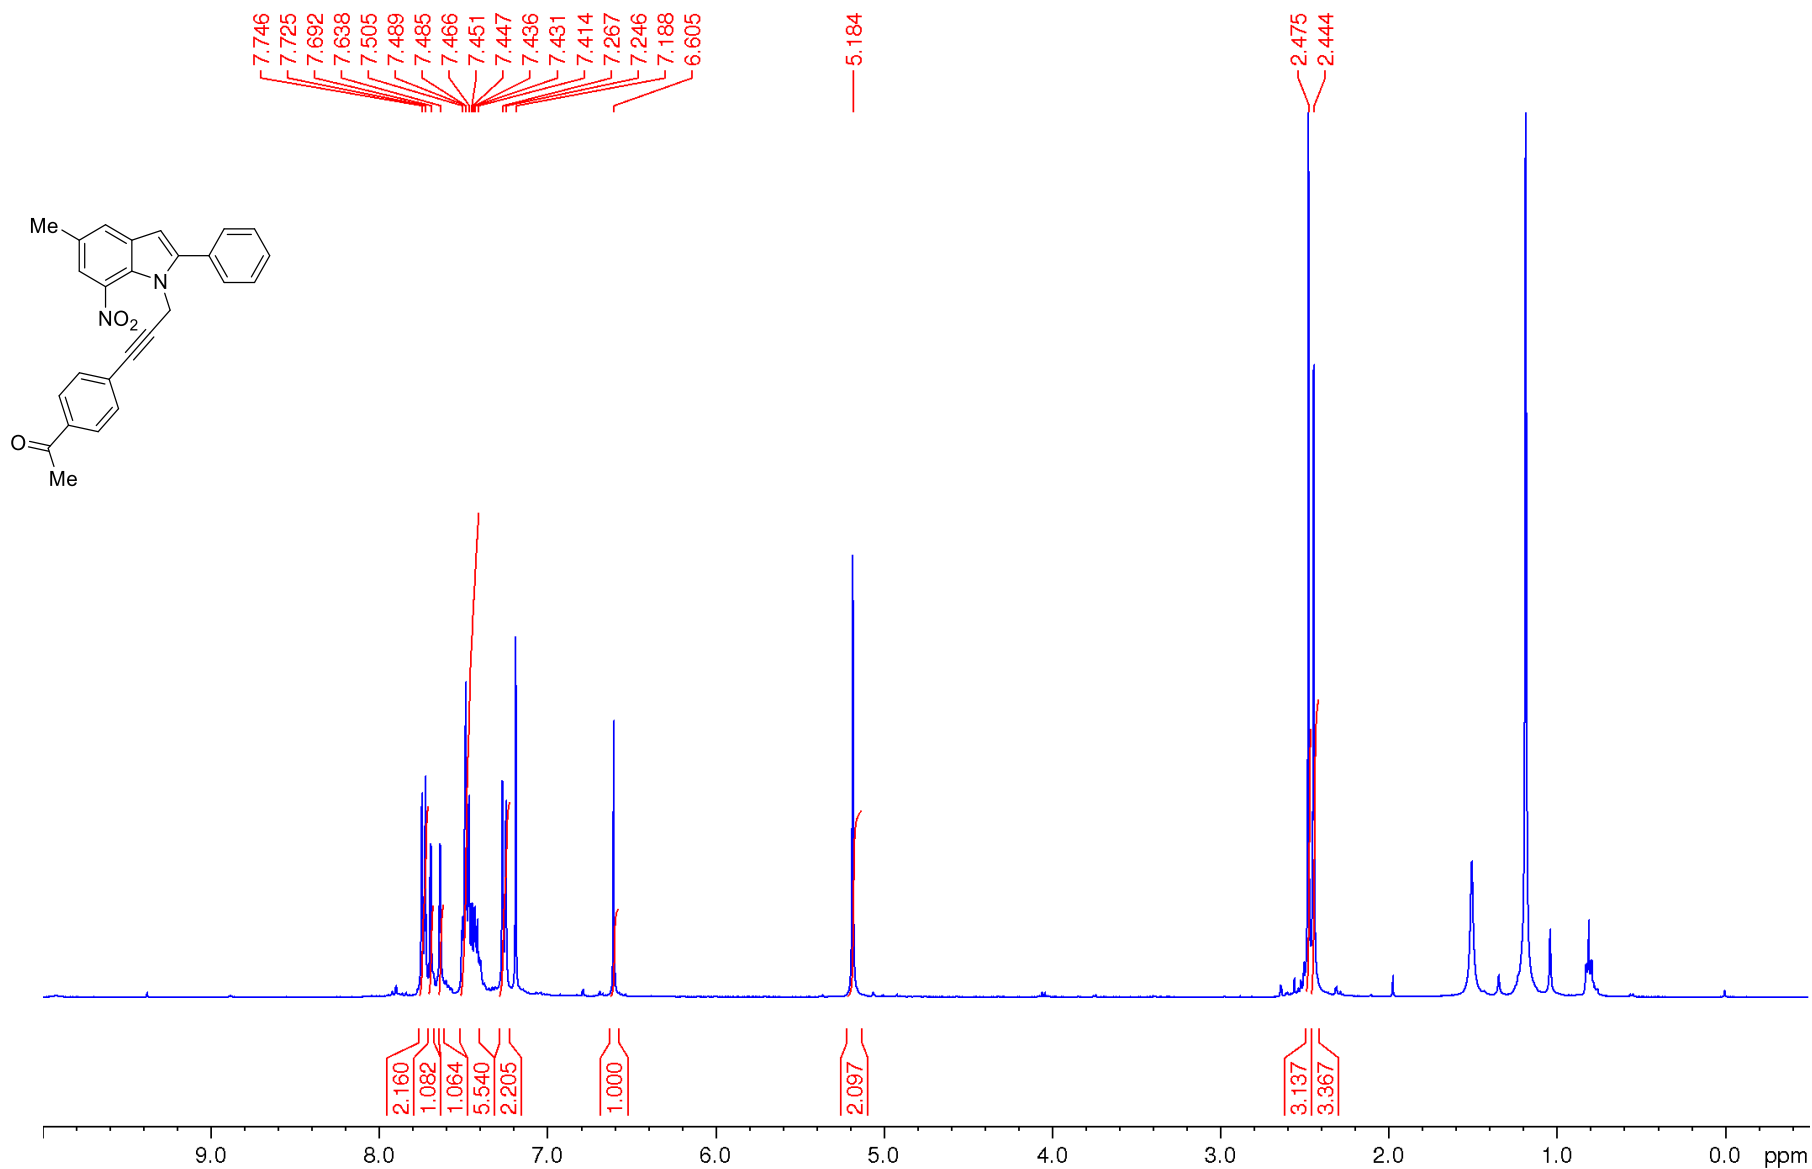

**1-(4-(3-(5-methyl-7-nitro-2-phenyl-1*H*-indol-1-yl)prop-1-yn-1-yl)phenyl)ethan-1-one 7g**

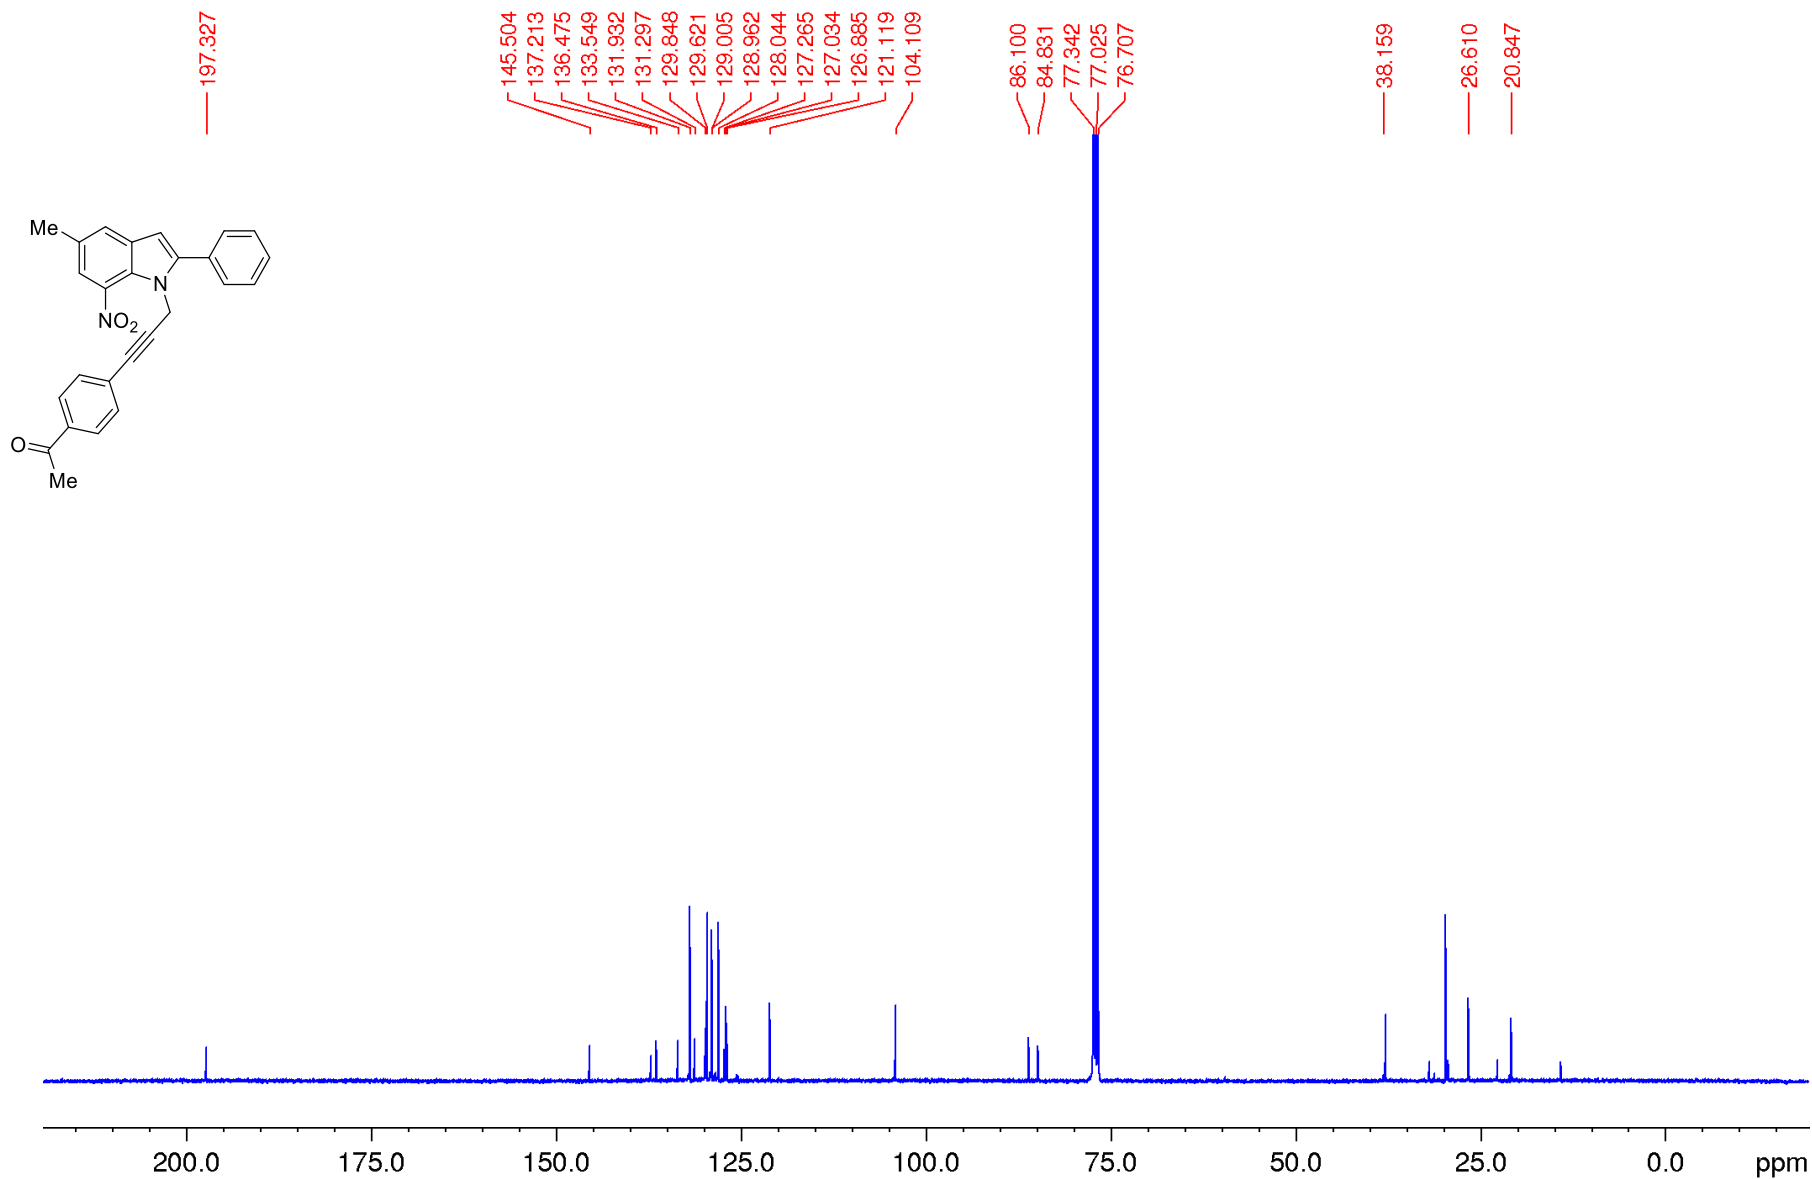

**1-(4-(3-(5-methyl-7-nitro-2-phenyl-1*H*-indol-1-yl)prop-1-yn-1-yl)phenyl)ethan-1-one 7g**

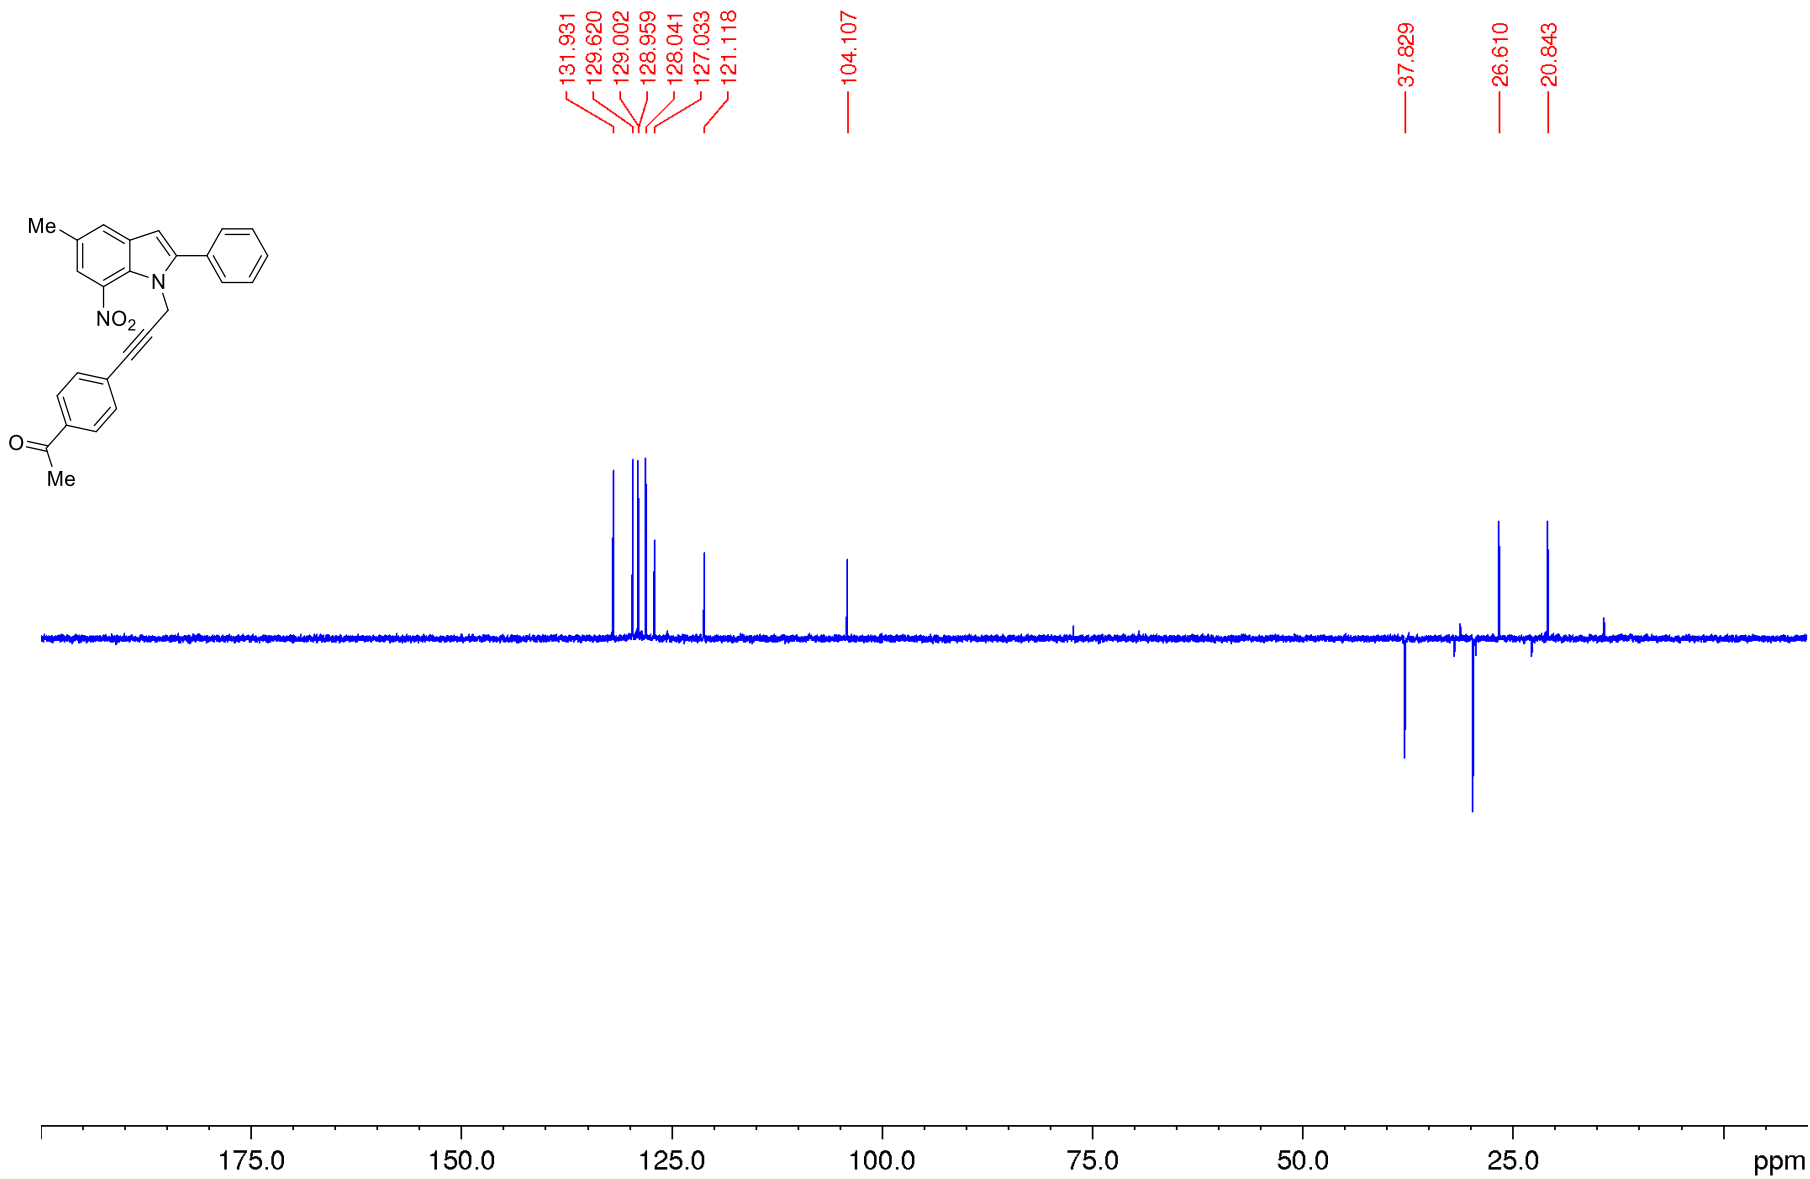

**methyl 4-(1-(3-(4-chlorophenyl)prop-2-yn-1-yl)-5-methyl-7-nitro-1H-indol-2-yl)benzoate 7h**

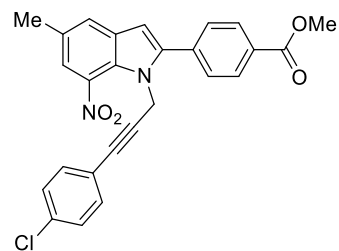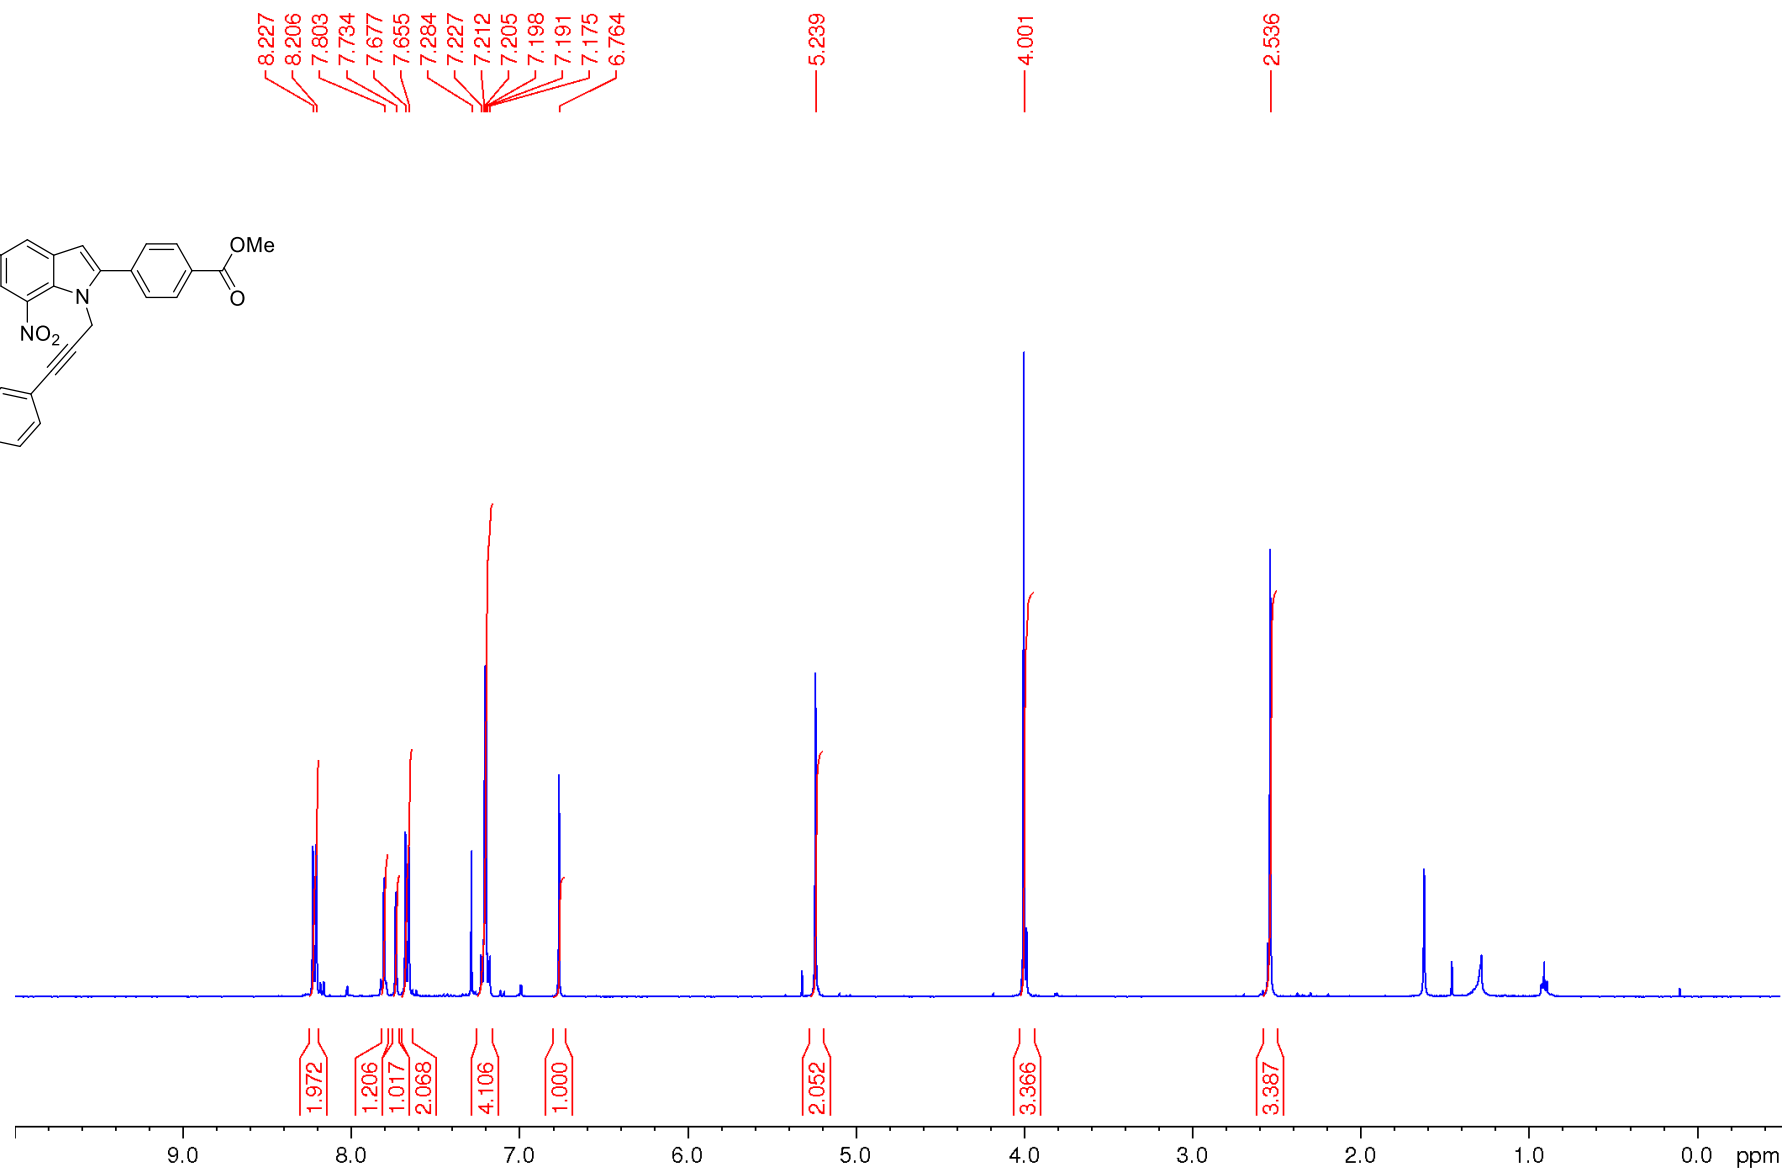



**methyl 4-(1-(3-(4-chlorophenyl)prop-2-yn-1-yl)-5-methyl-7-nitro-1*H*-indol-2-yl)benzoate 7h**

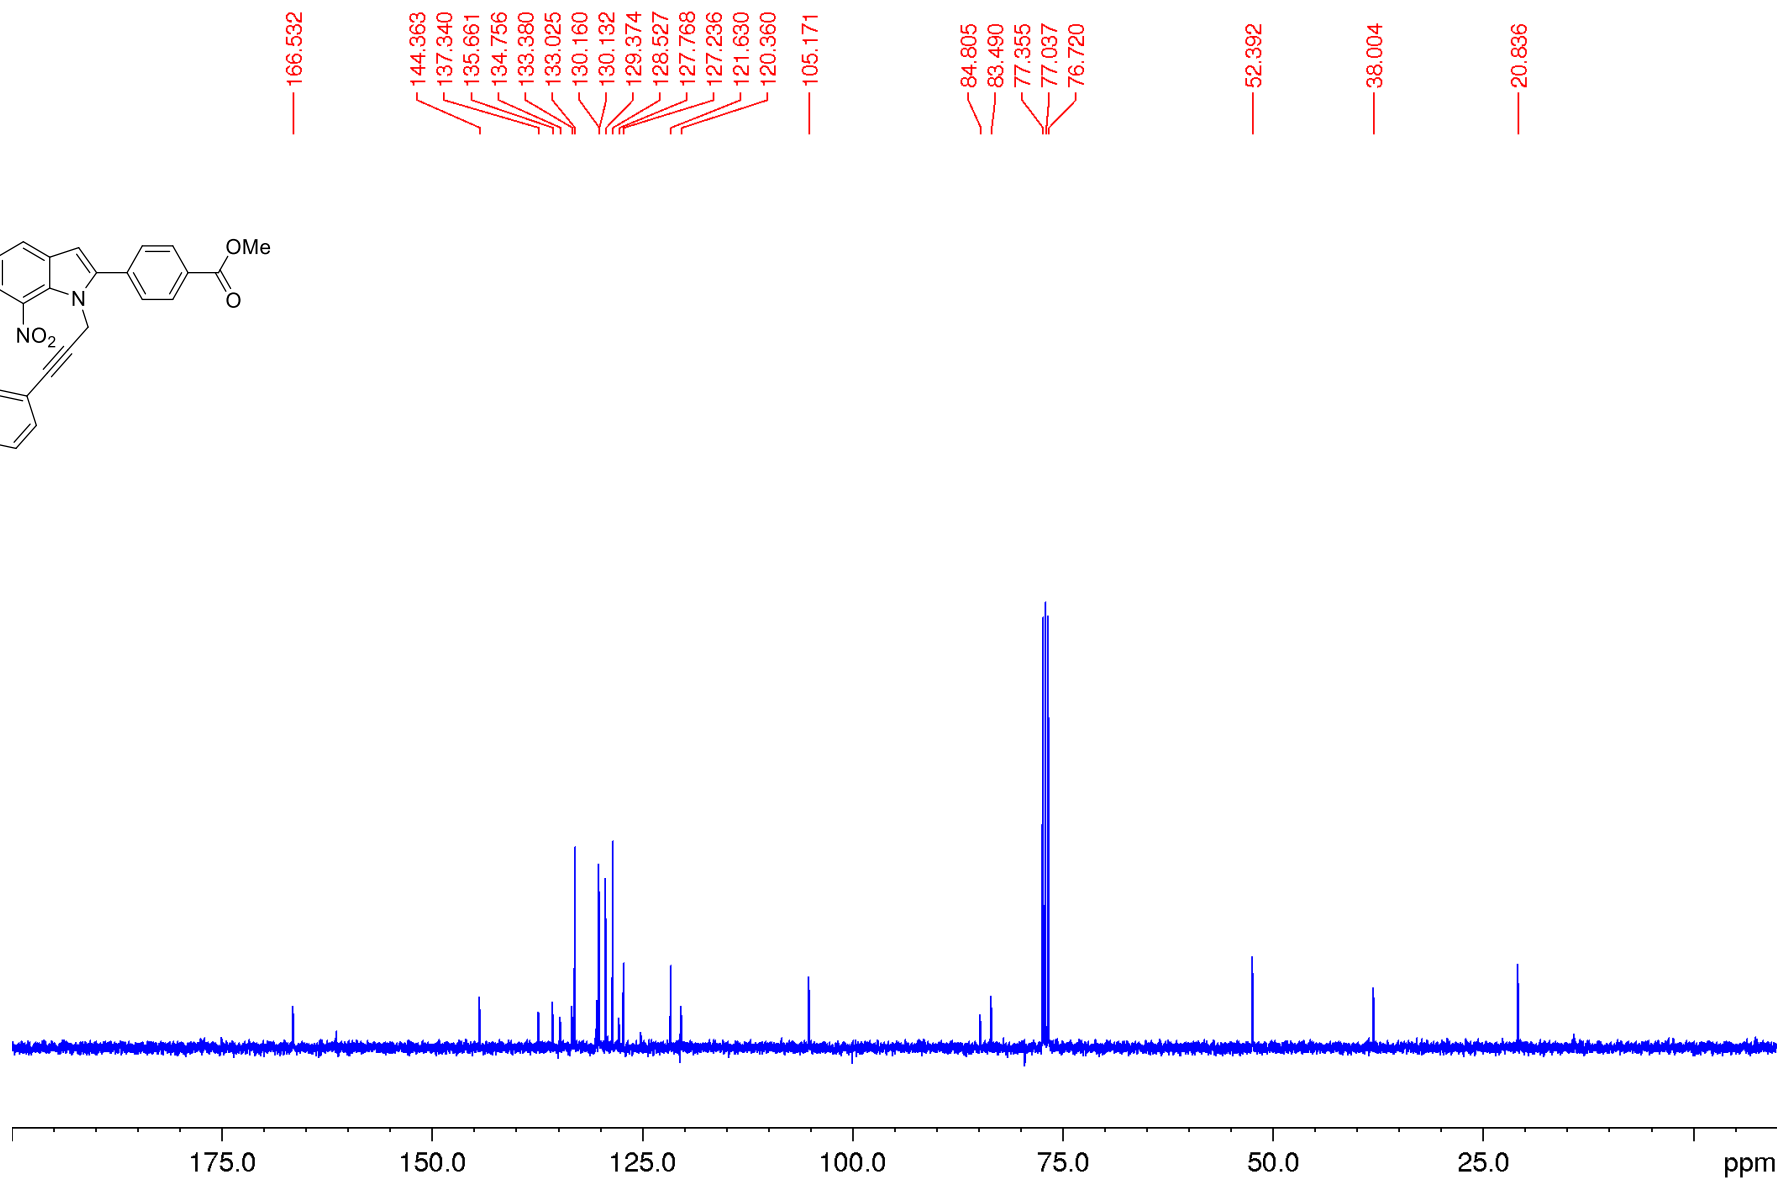

**methyl 4-(1-(3-(4-chlorophenyl)prop-2-yn-1-yl)-5-methyl-7-nitro-1*H*-indol-2-yl)benzoate 7h**

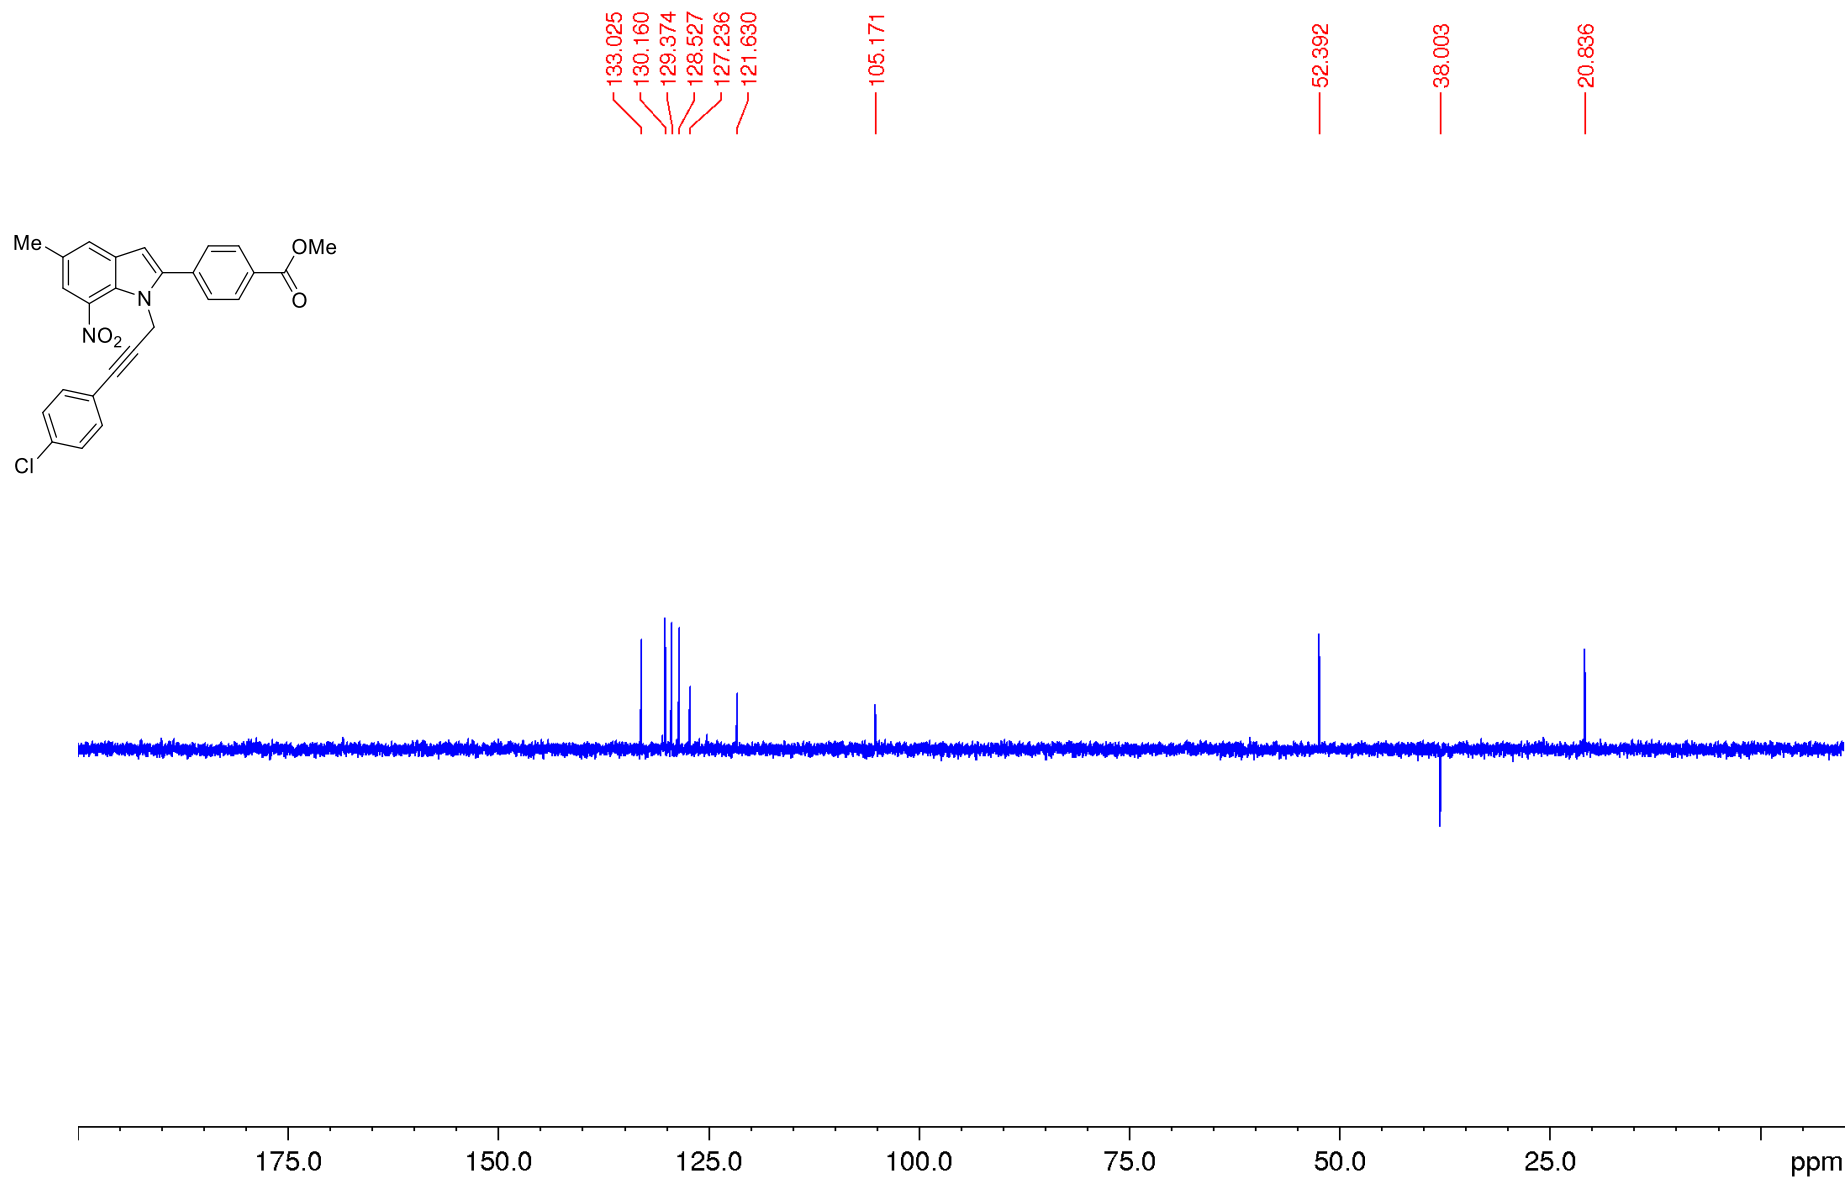

**1-(3-(4-chlorophenyl)prop-2-yn-1-yl)-5-methyl-7-nitro-2-phenyl-1*H*-indole 7i**

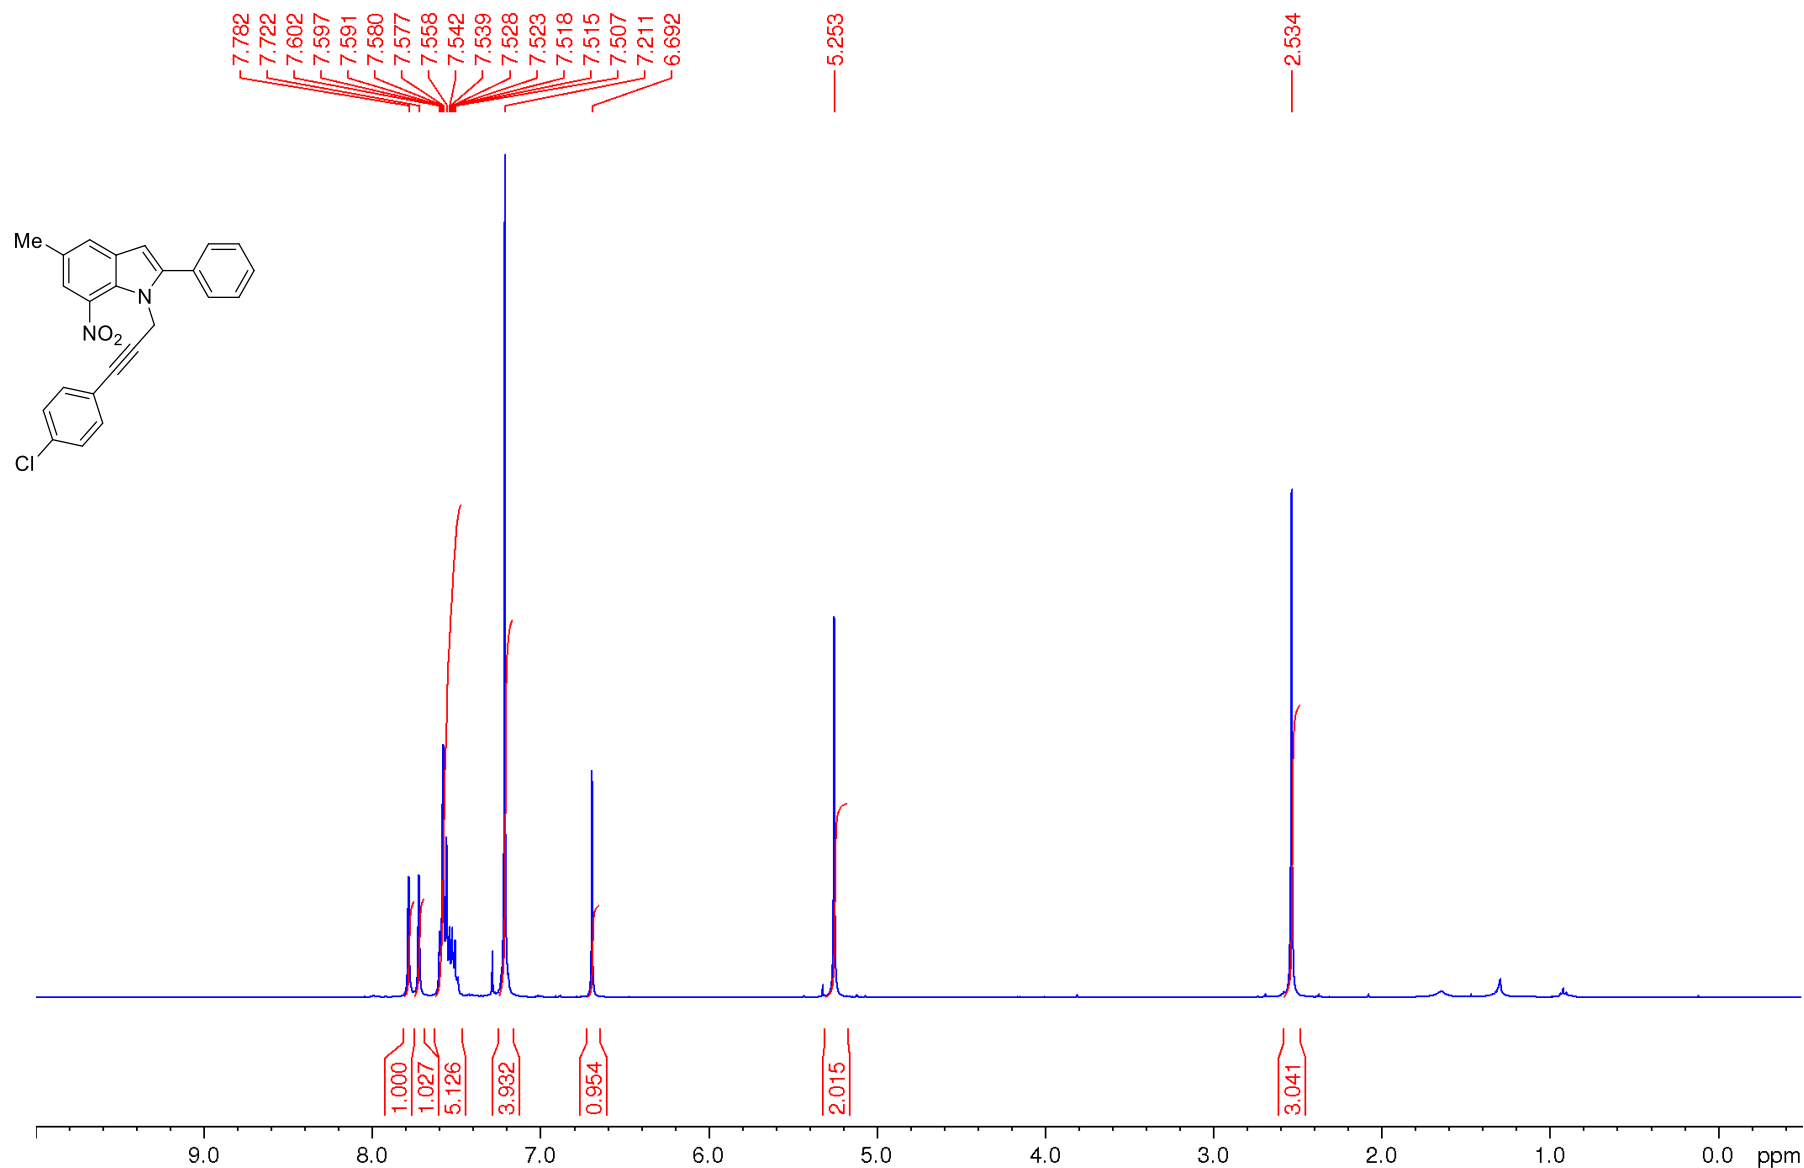

**1-(3-(4-chlorophenyl)prop-2-yn-1-yl)-5-methyl-7-nitro-2-phenyl-1*H*-indole 7i**

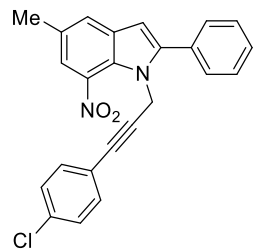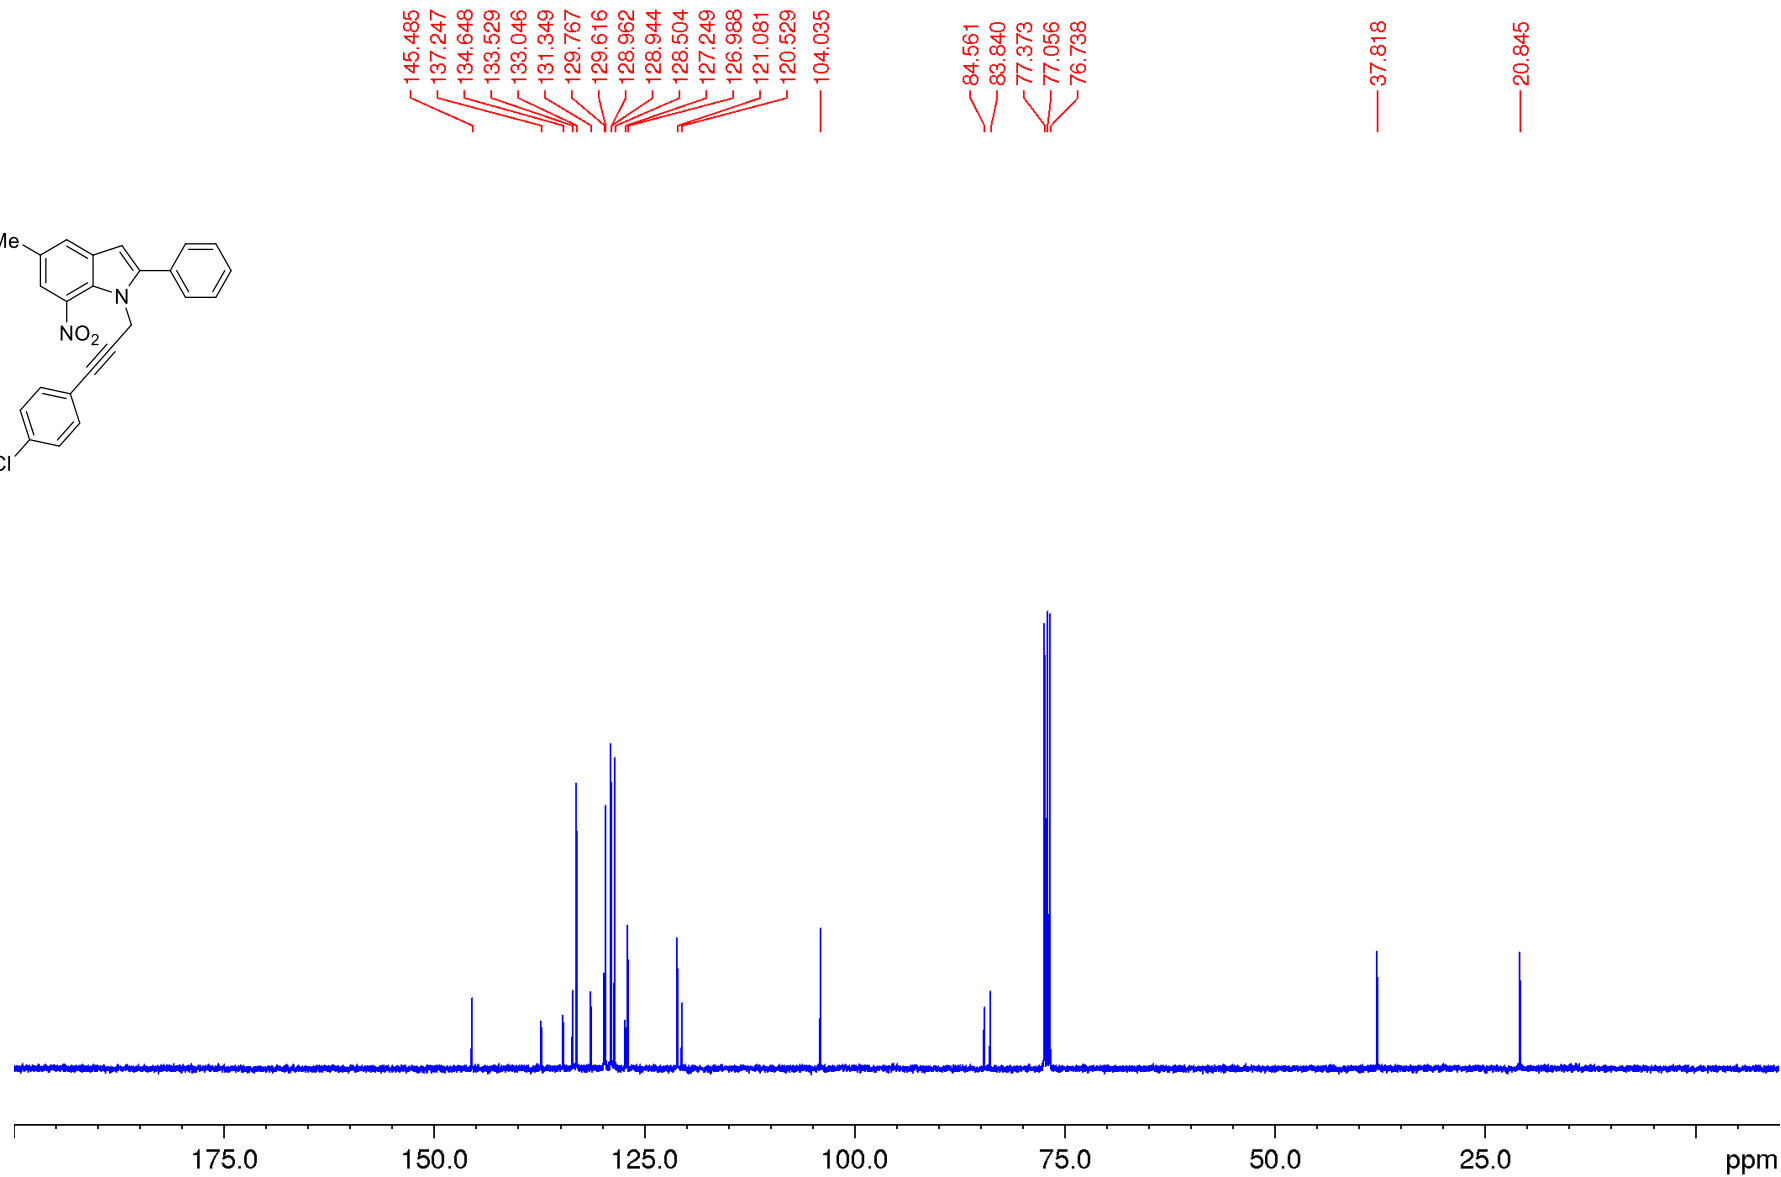

**1-(3-(4-chlorophenyl)prop-2-yn-1-yl)-5-methyl-7-nitro-2-phenyl-1*H*-indole 7i**

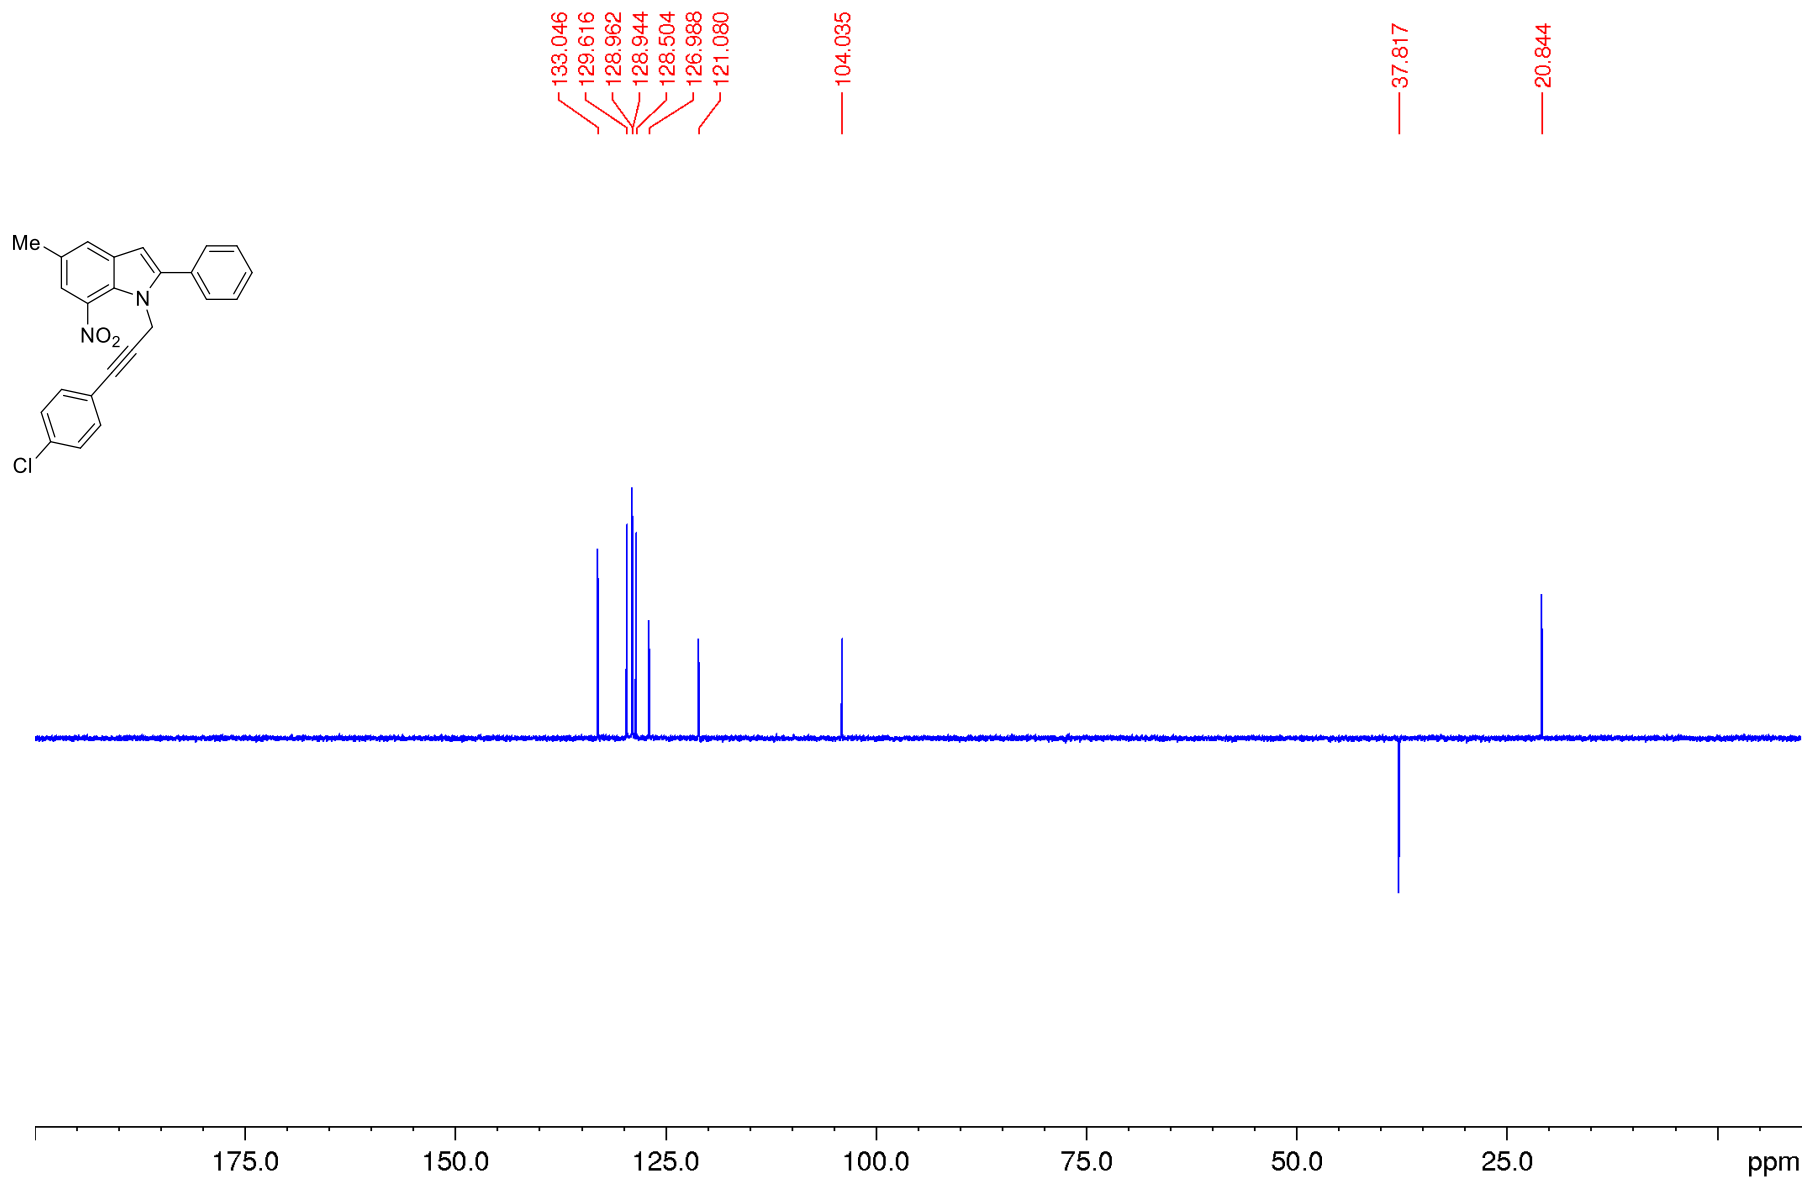

# 5-chloro-2-phenyl-1-(3-phenylprop-2-yn-1-yl)-1H-indol-7-amine 1a

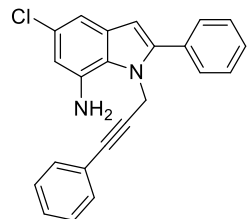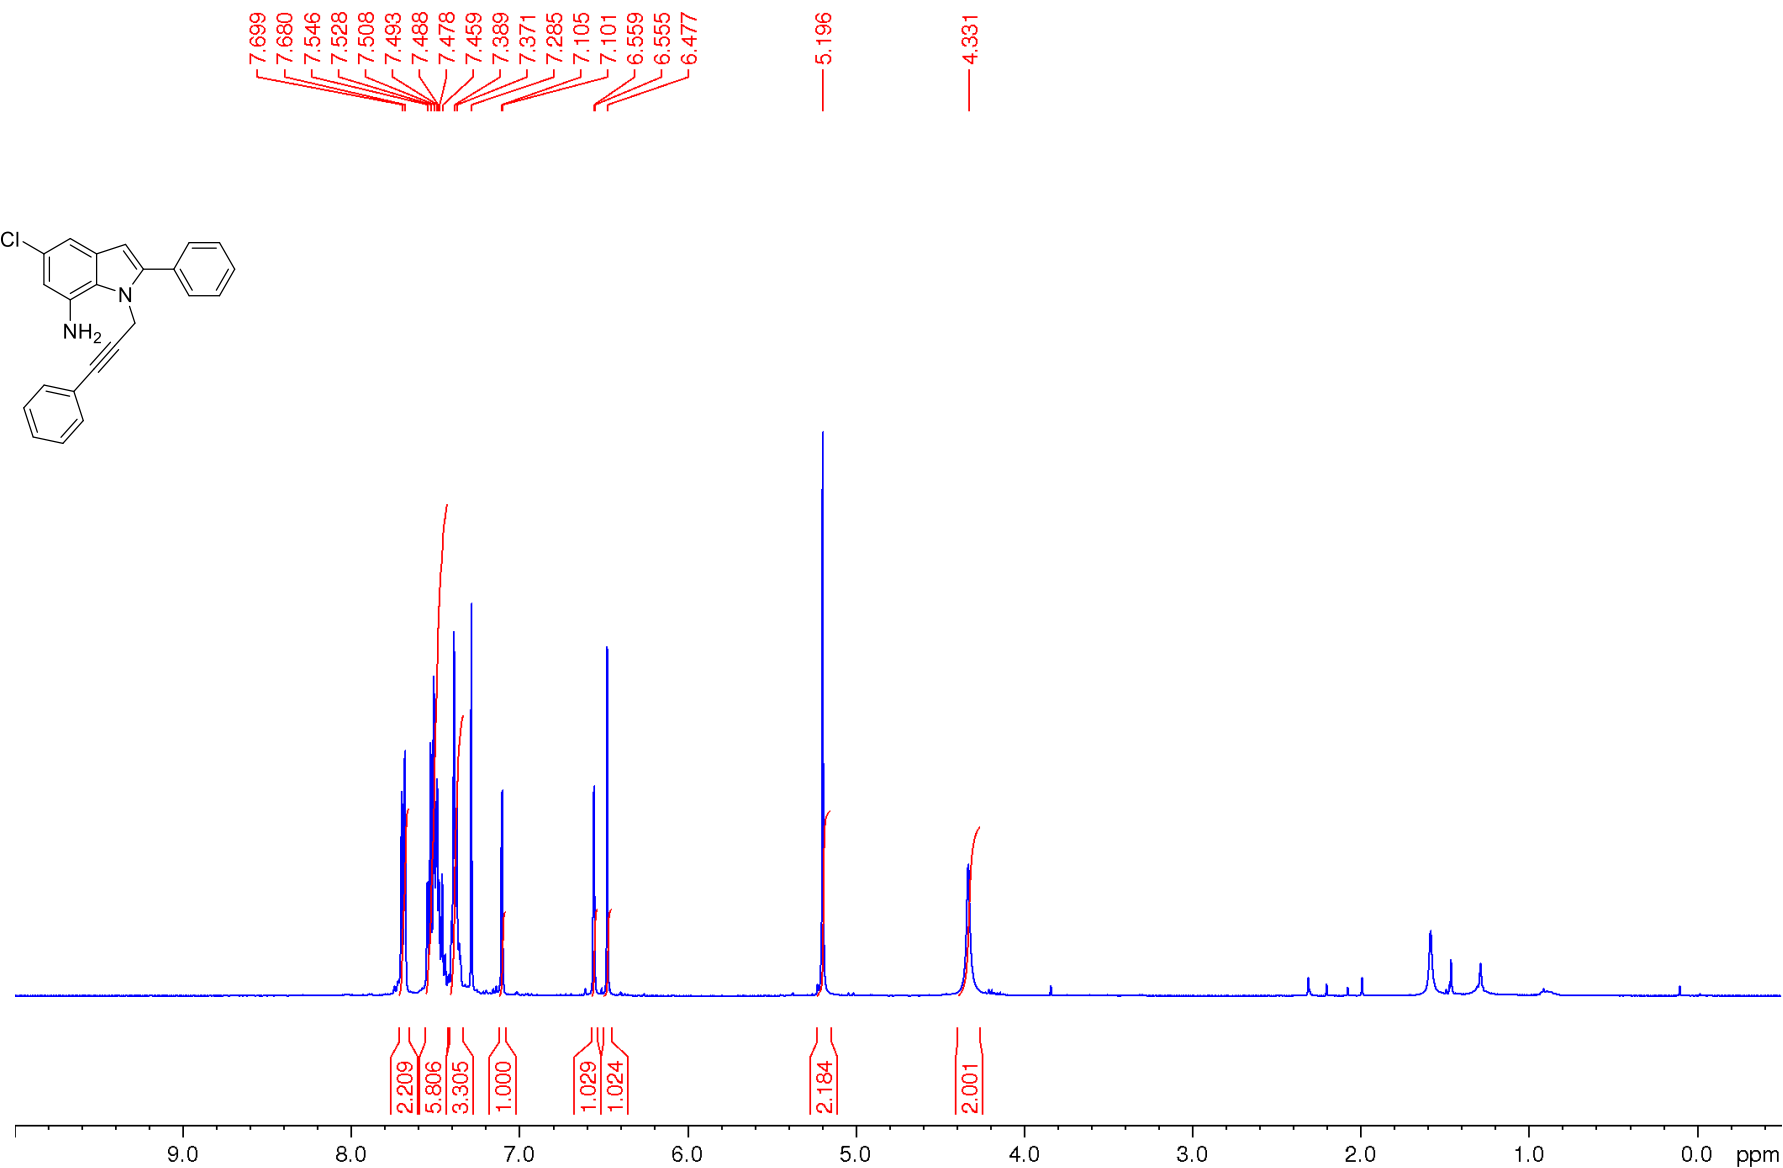

# 5-chloro-2-phenyl-1-(3-phenylprop-2-yn-1-yl)-1H-indol-7-amine 1a

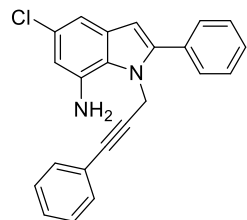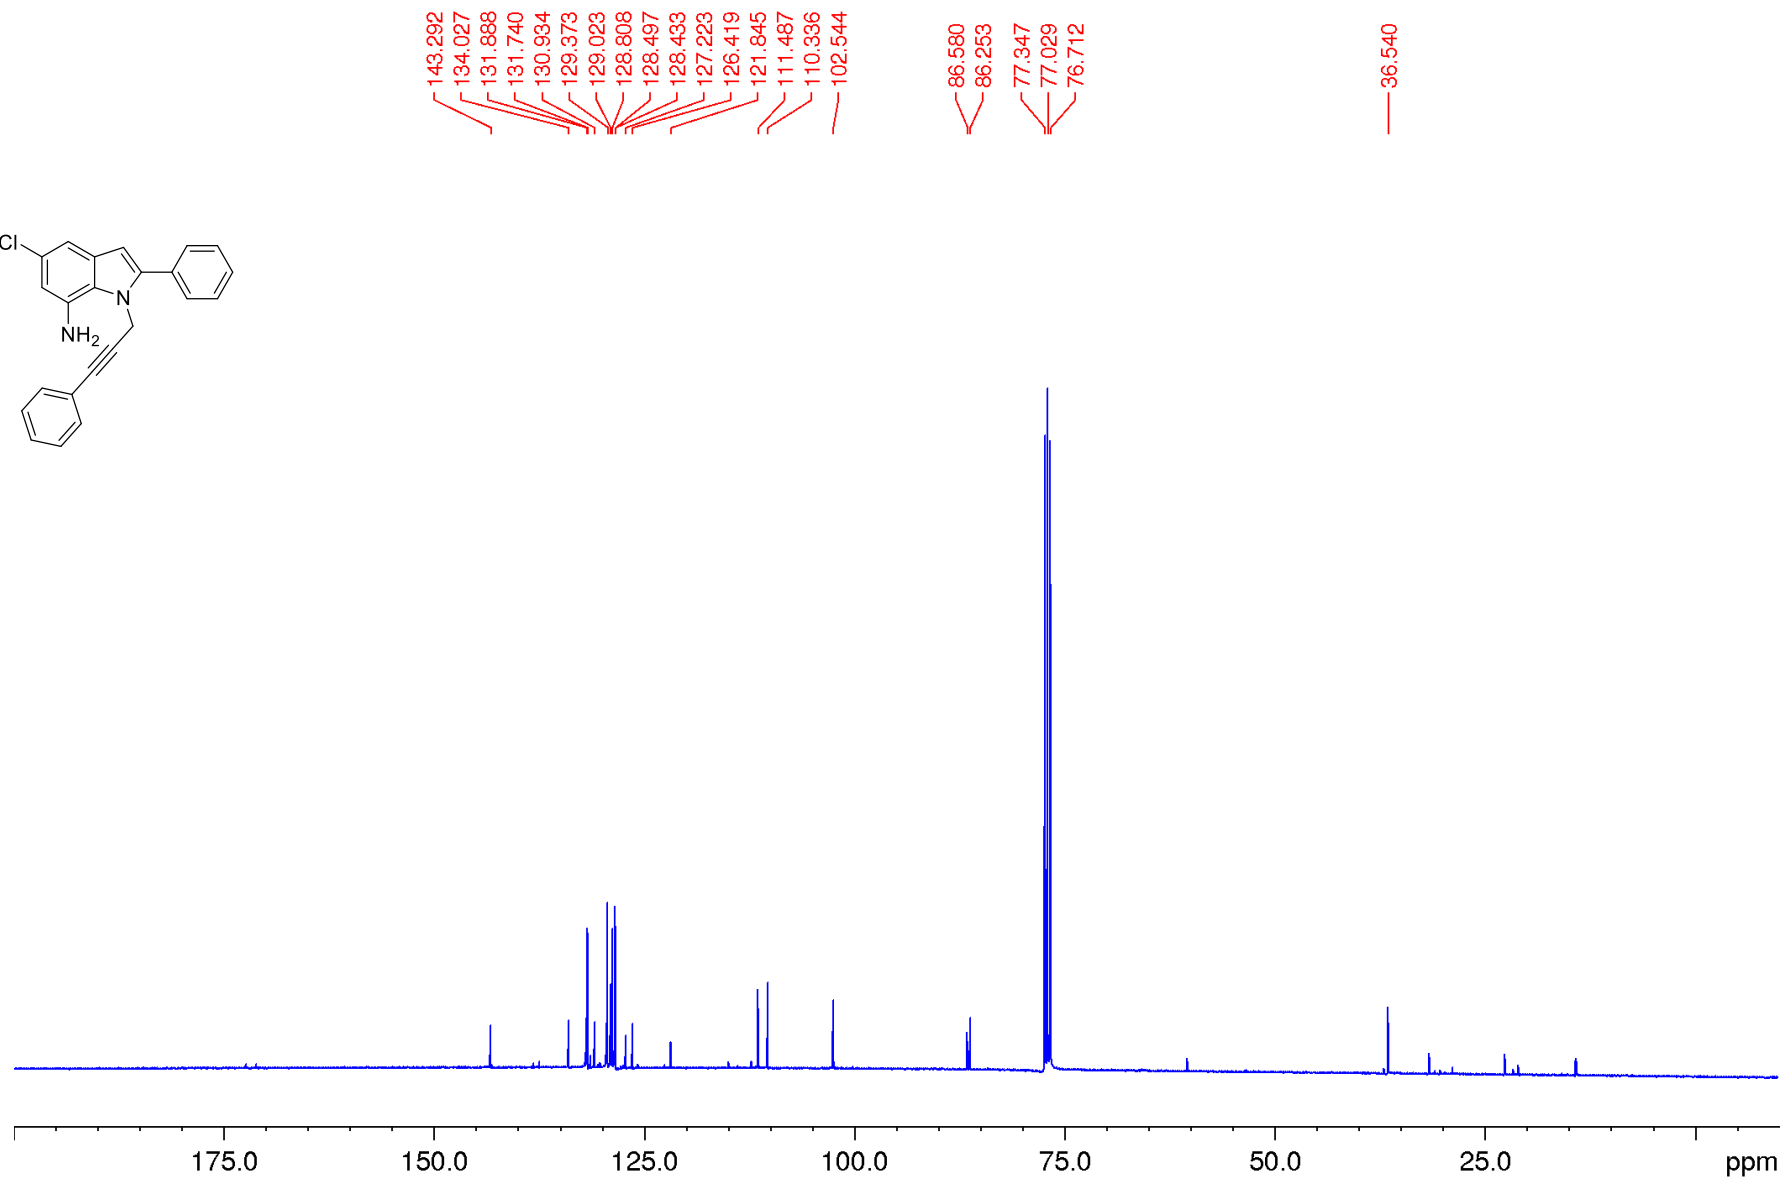

# 5-chloro-2-phenyl-1-(3-phenylprop-2-yn-1-yl)-1*H*-indol-7-amine 1a

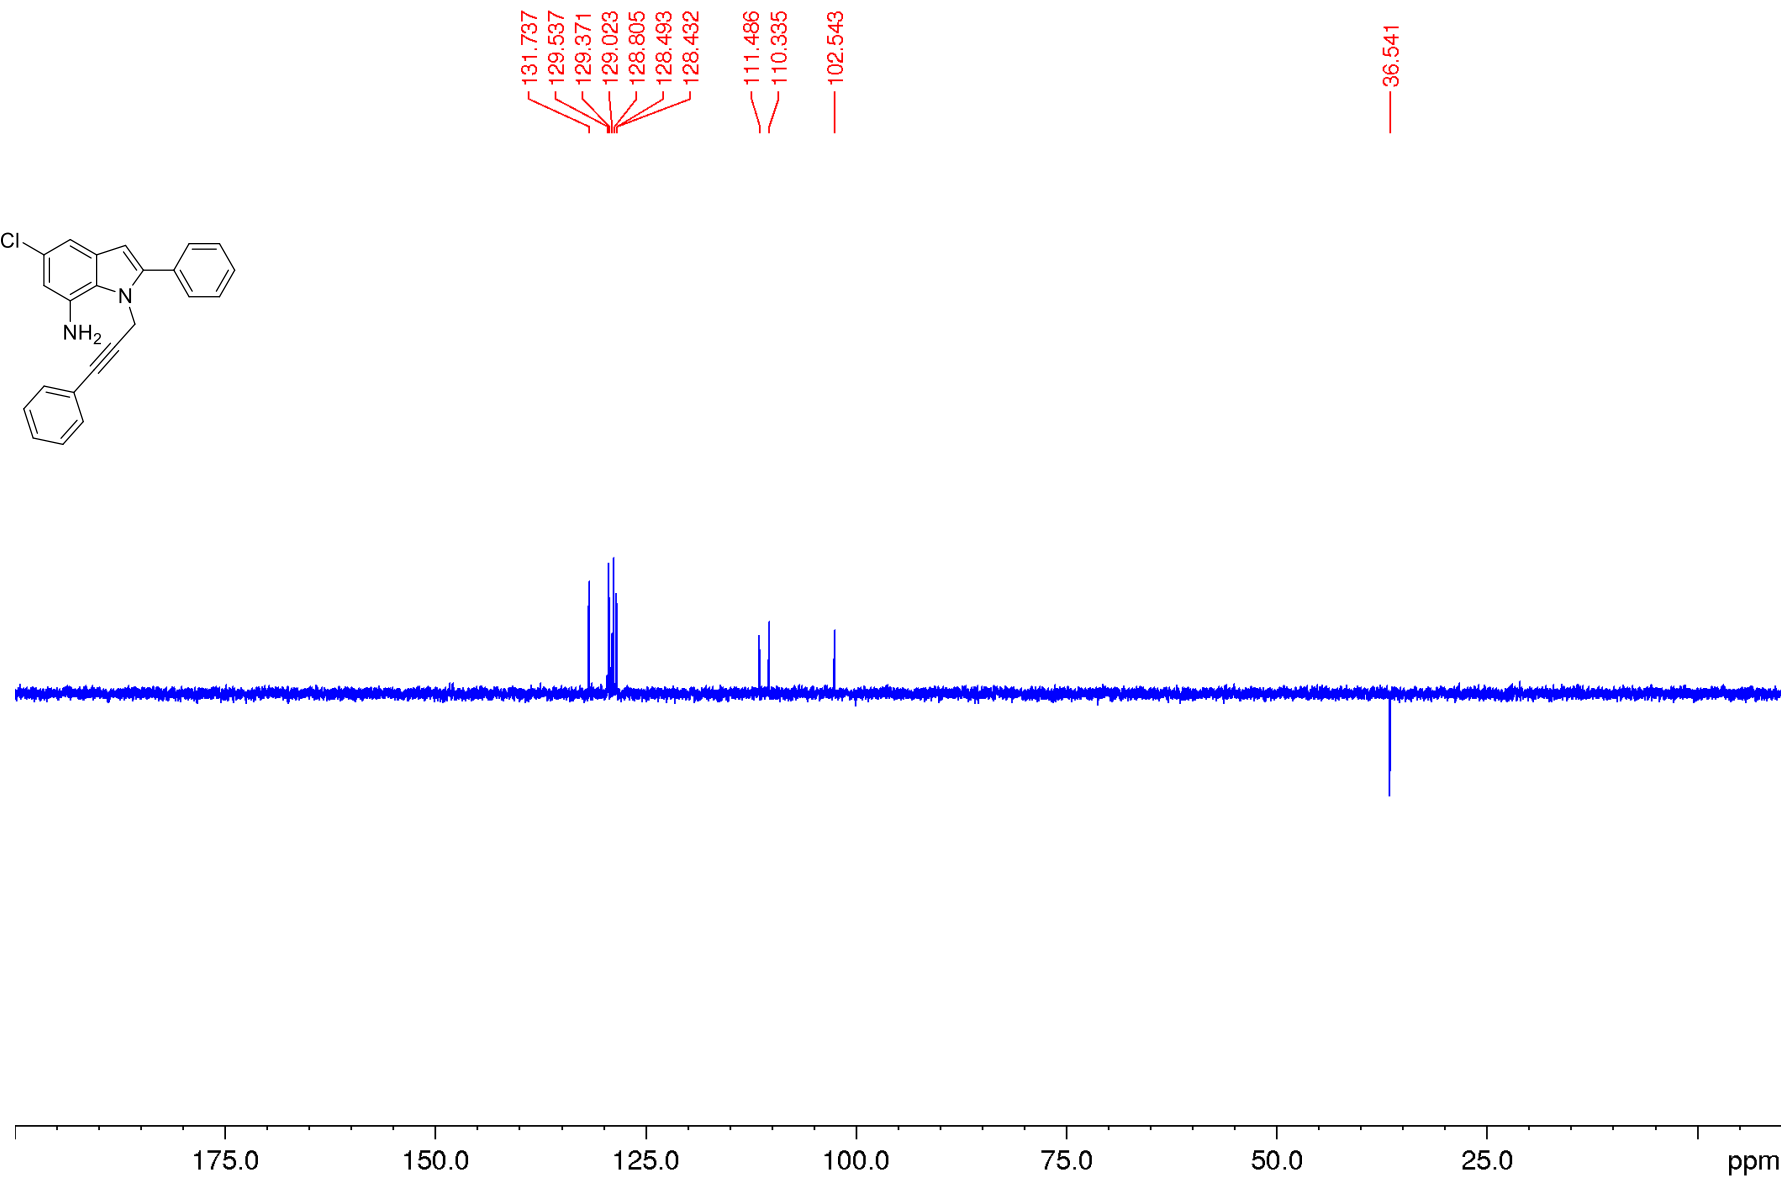



**5-chloro-1-(3-(4-chlorophenyl)prop-2-yn-1-yl)-2-phenyl-1H-indol-7-amine 1b**

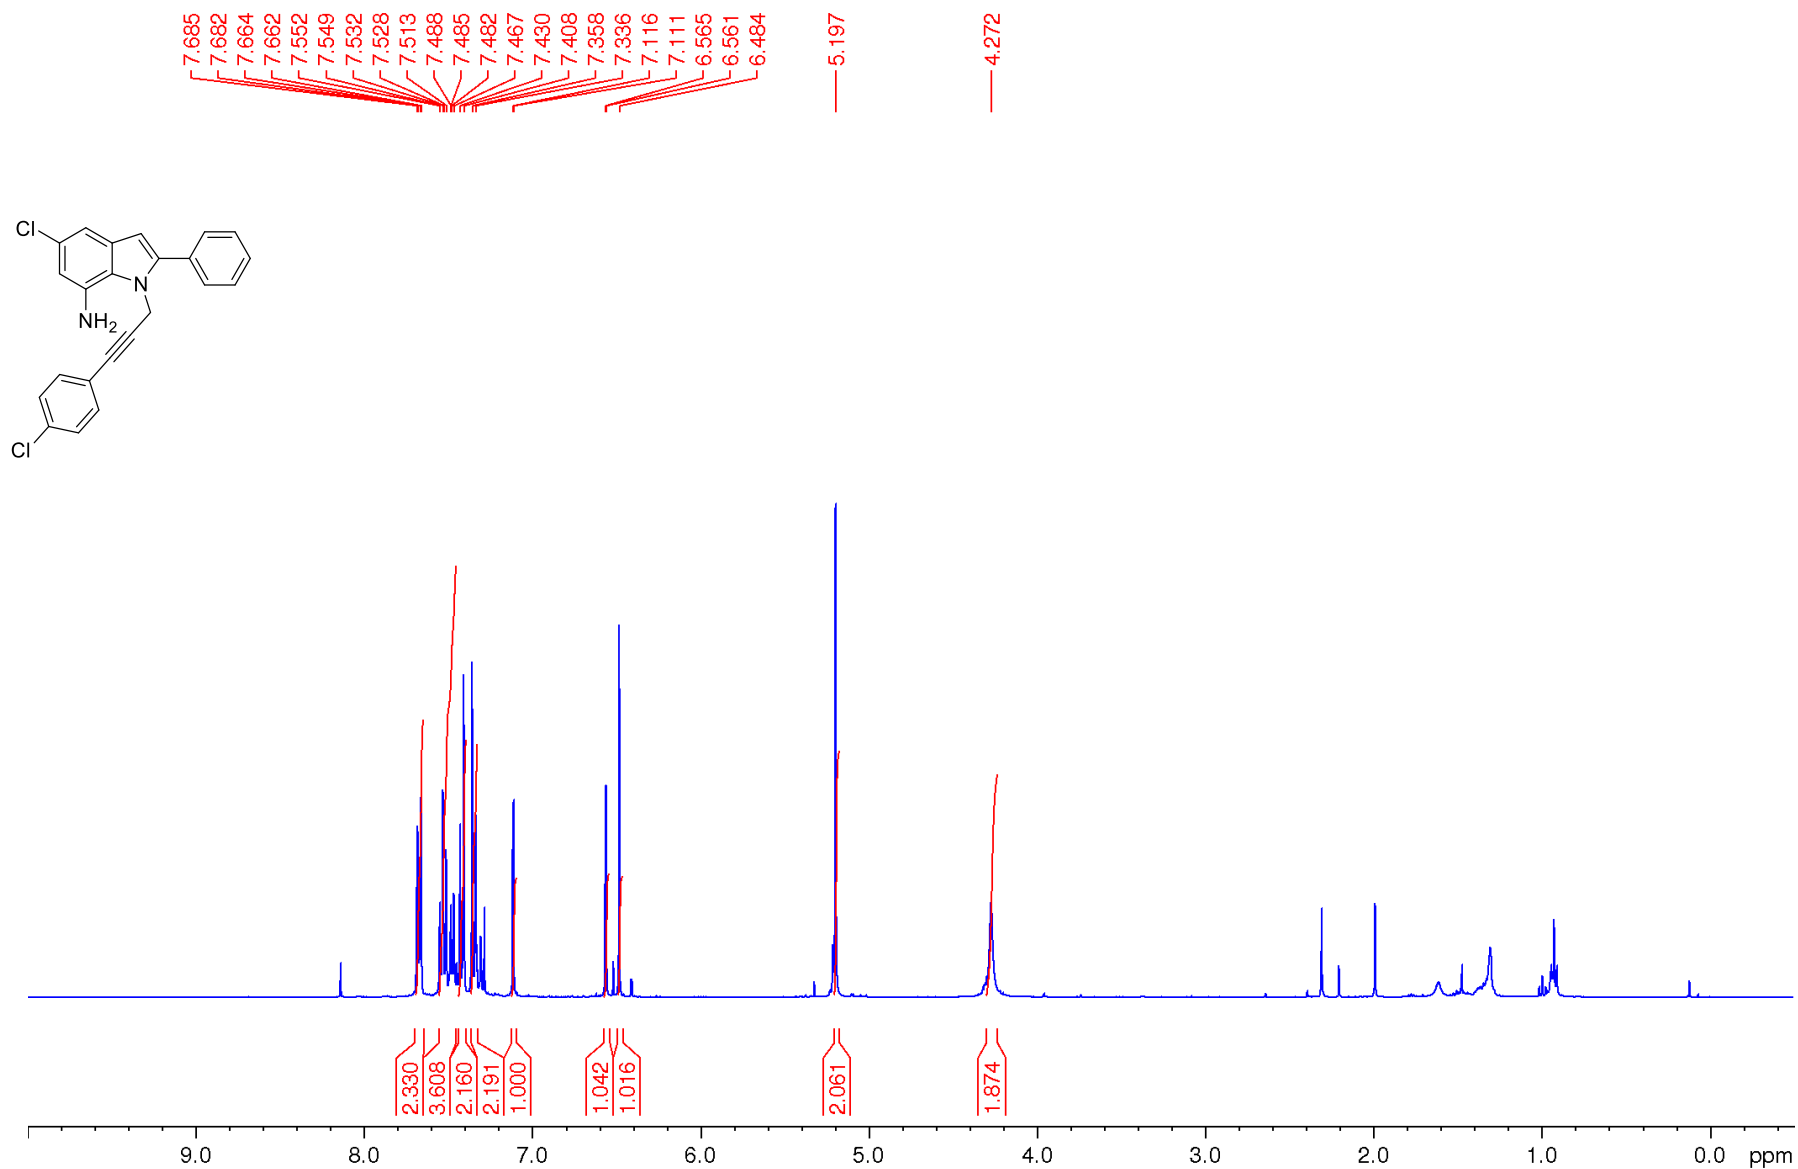

**5-chloro-1-(3-(4-chlorophenyl)prop-2-yn-1-yl)-2-phenyl-1H-indol-7-amine 1b**

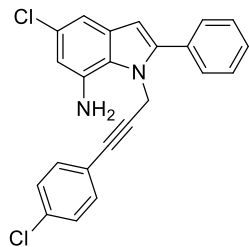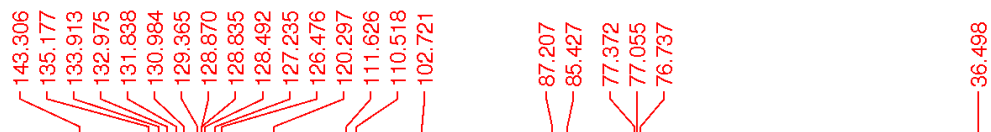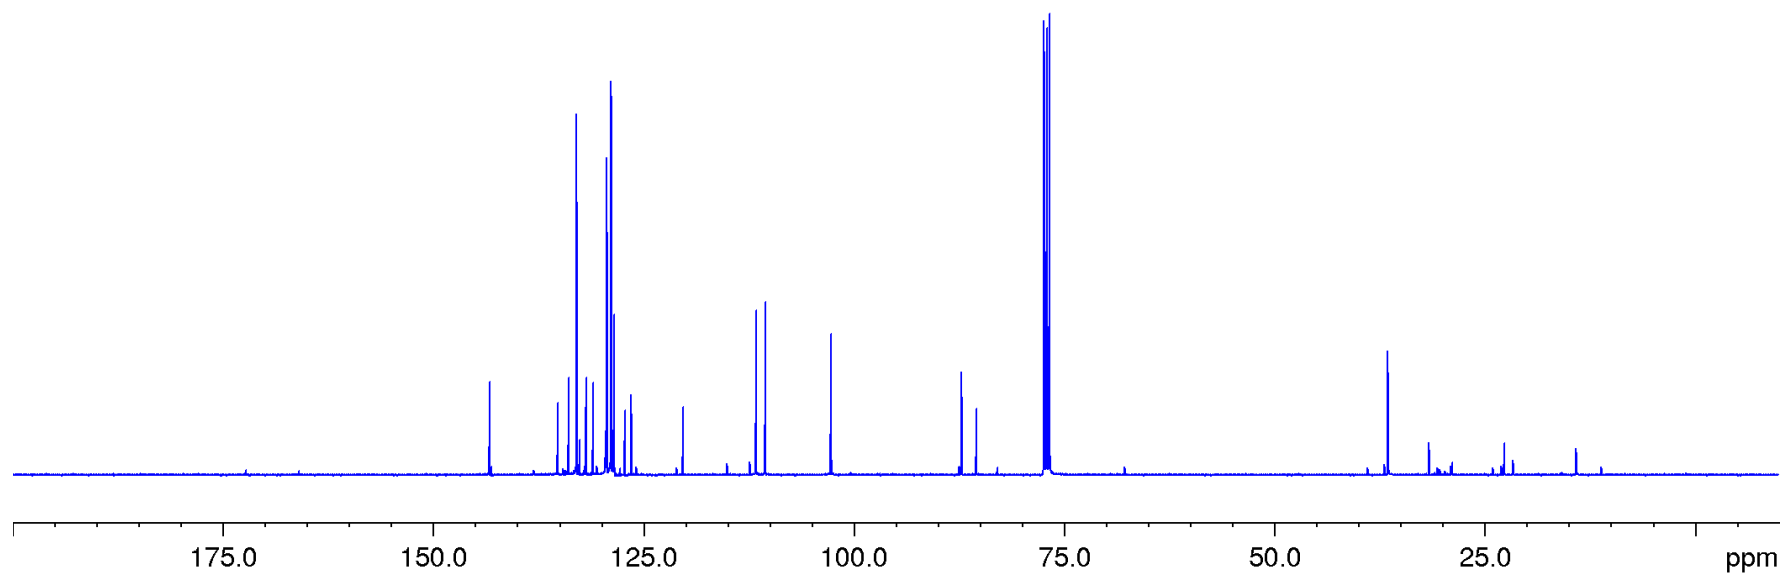

**5-chloro-1-(3-(4-chlorophenyl)prop-2-yn-1-yl)-2-phenyl-1H-indol-7-amine 1b**



132.975  
129.364  
128.870  
128.491

111.626  
110.518

102.720

36.498

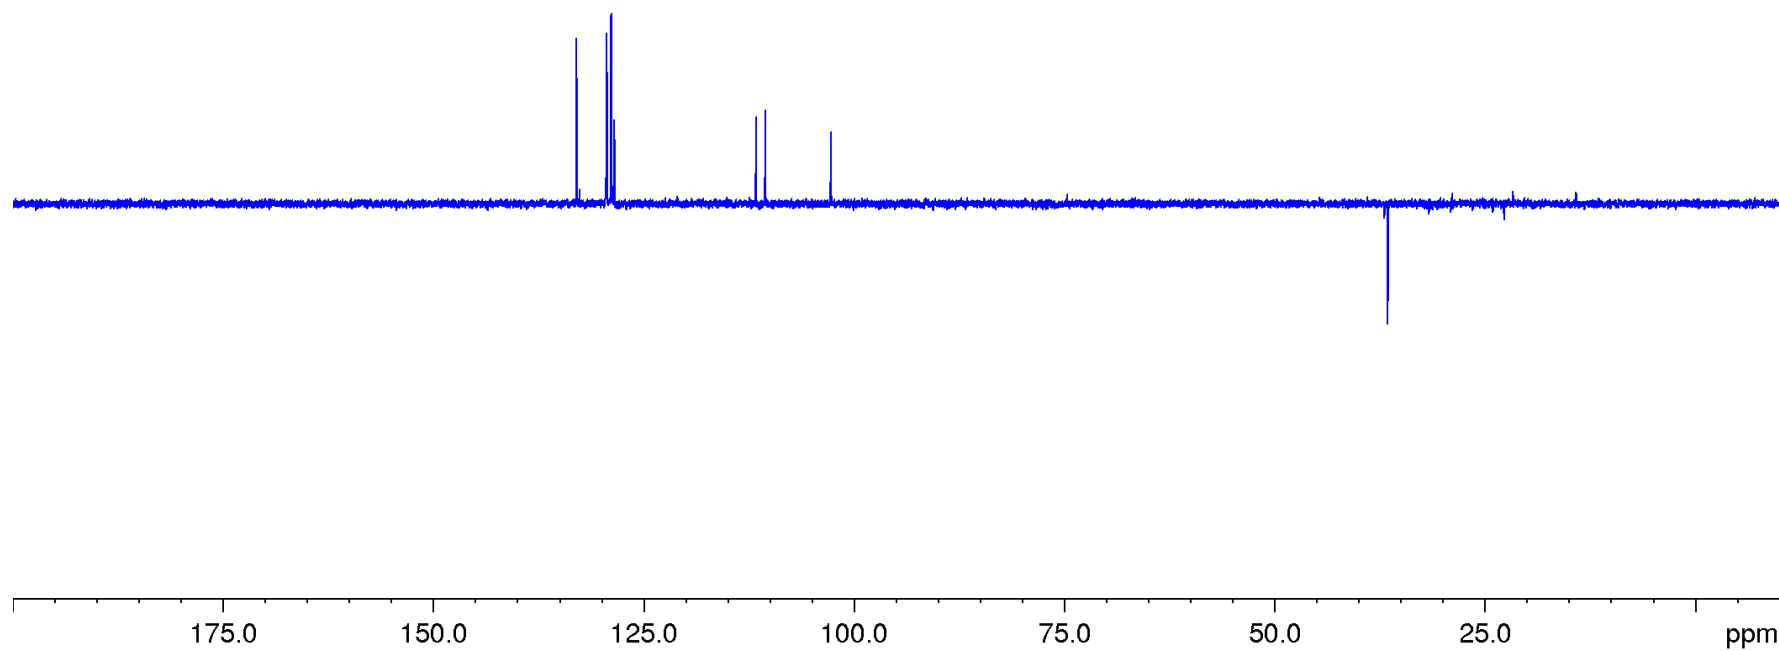

**5-chloro-1-(3-(4-methoxyphenyl)prop-2-yn-1-yl)-2-phenyl-1H-indol-7-amine 1c**

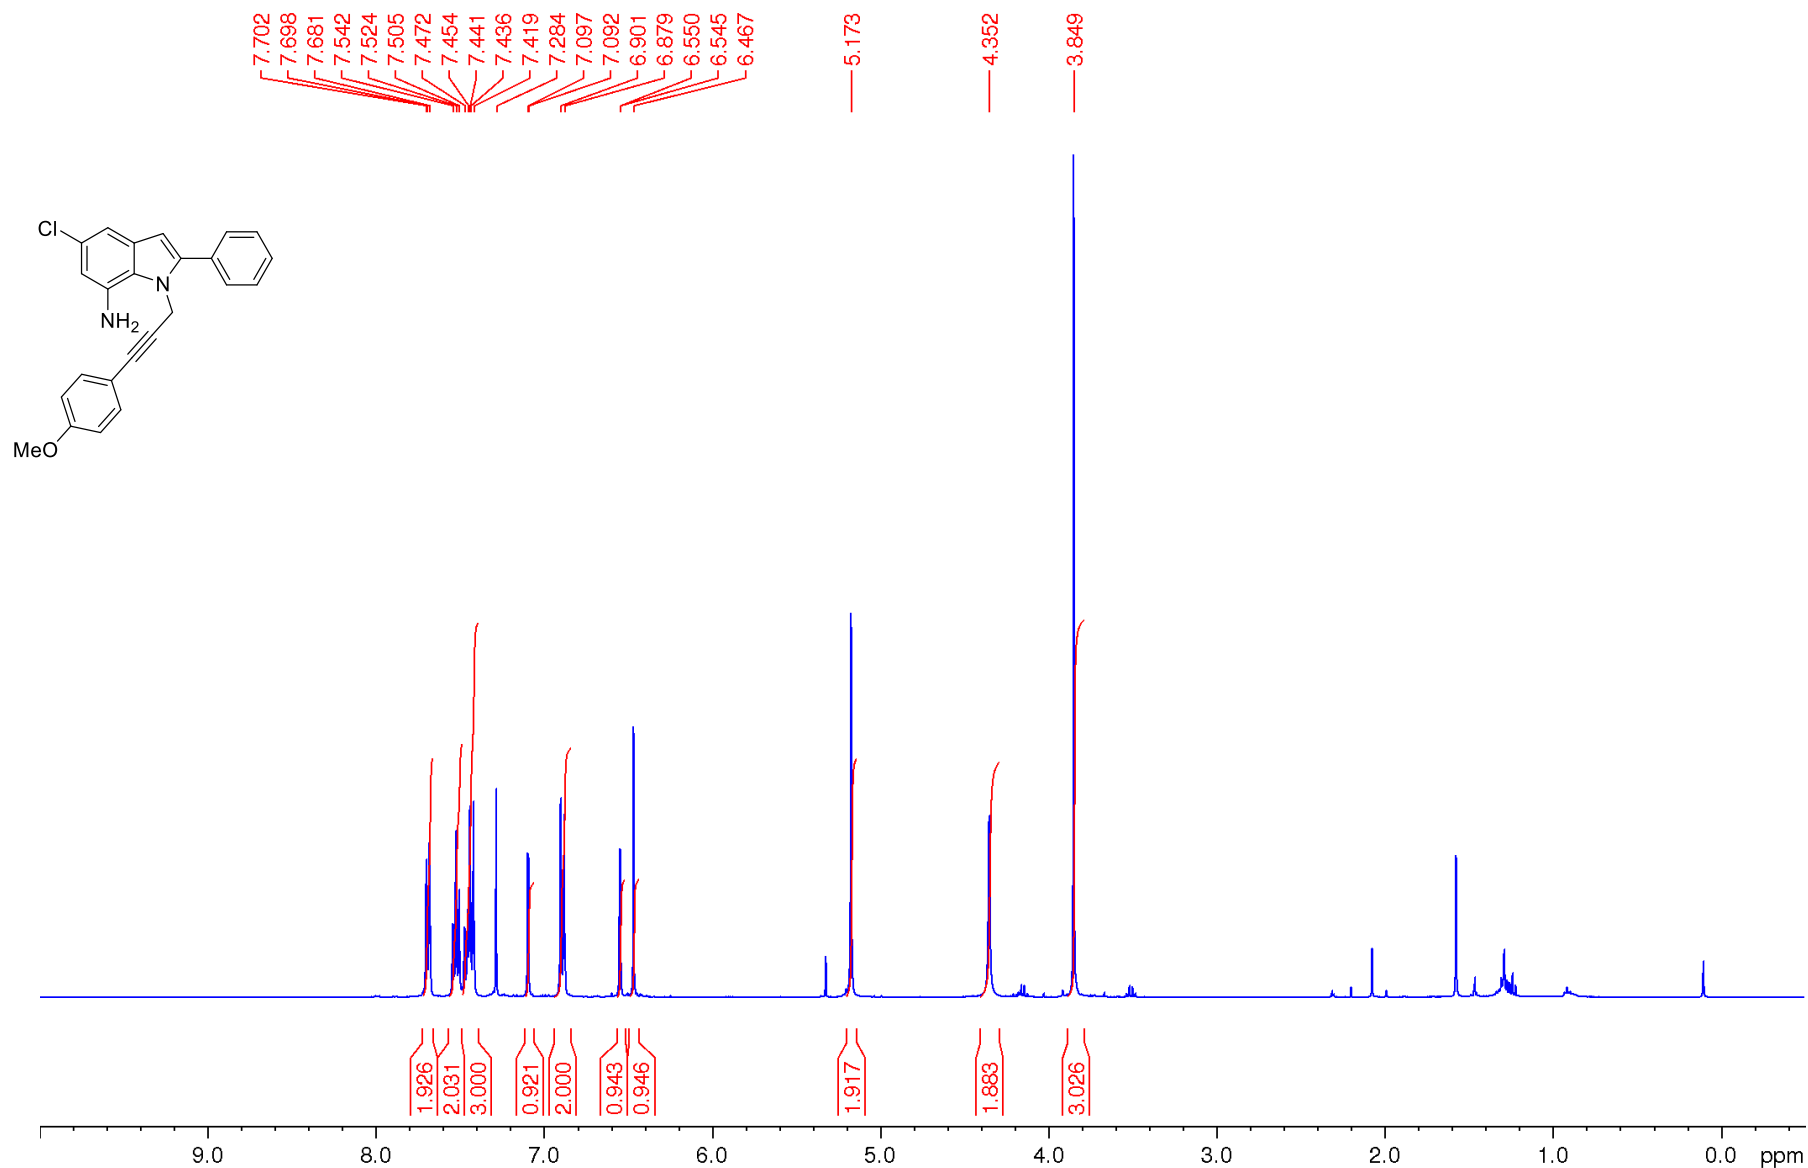

**5-chloro-1-(3-(4-methoxyphenyl)prop-2-yn-1-yl)-2-phenyl-1H-indol-7-amine 1c**

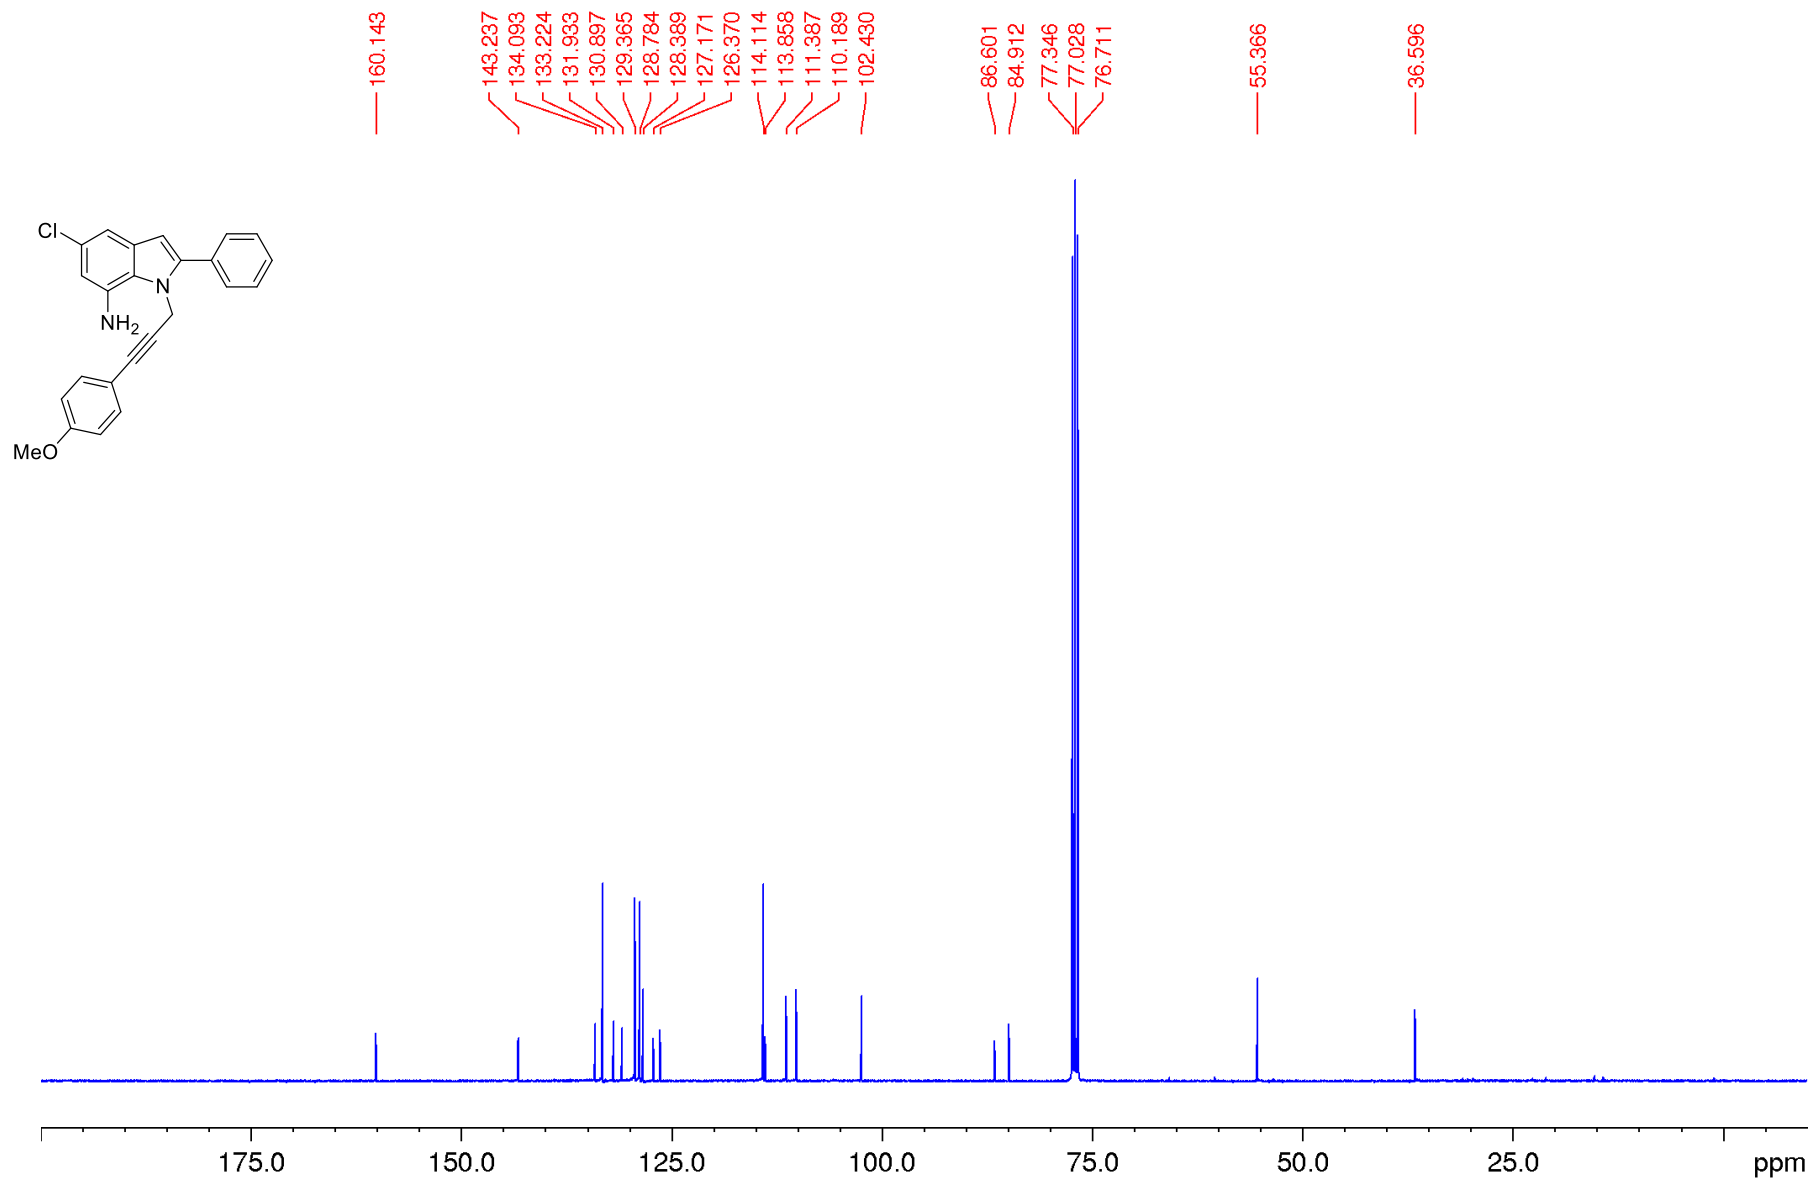

**5-chloro-1-(3-(4-methoxyphenyl)prop-2-yn-1-yl)-2-phenyl-1*H*-indol-7-amine 1c**

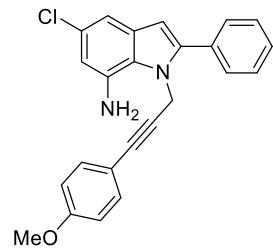

133.224  
129.365  
128.784  
128.389

114.113  
111.387  
110.188  
102.429

55.365

36.594

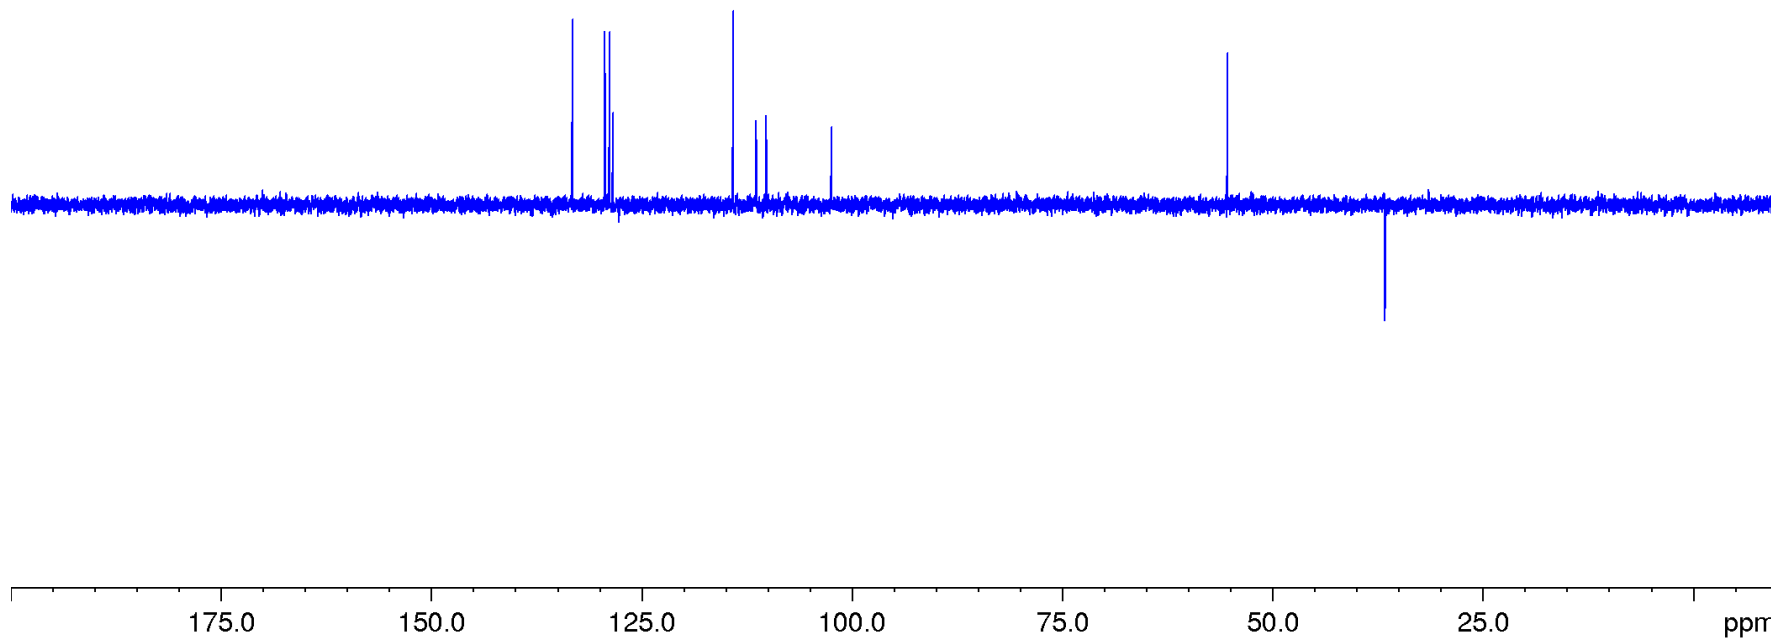

**1-(4-(3-(7-amino-5-chloro-2-phenyl-1*H*-indol-1-yl)prop-1-yn-1-yl)phenyl)ethan-1-one 1d**

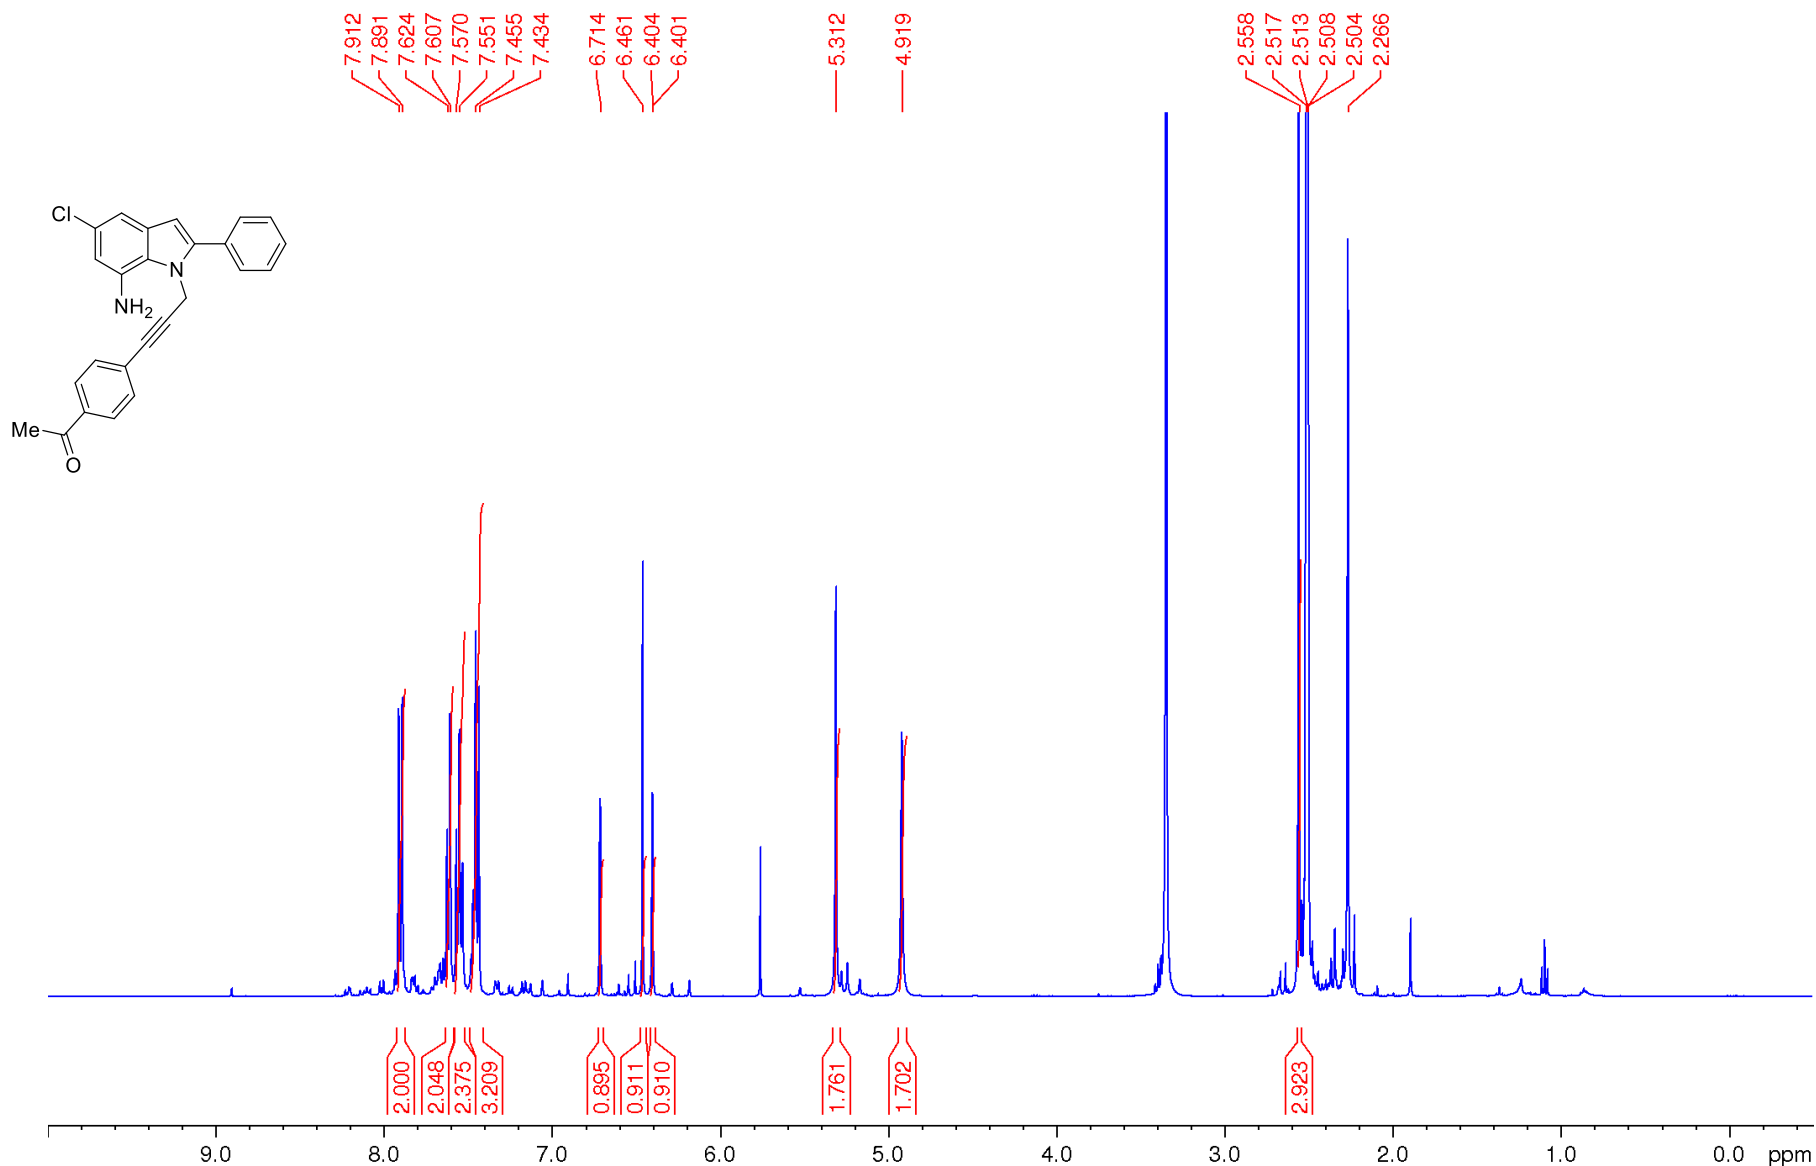

**1-(4-(3-(7-amino-5-chloro-2-phenyl-1*H*-indol-1-yl)prop-1-yn-1-yl)phenyl)ethan-1-one 1d**

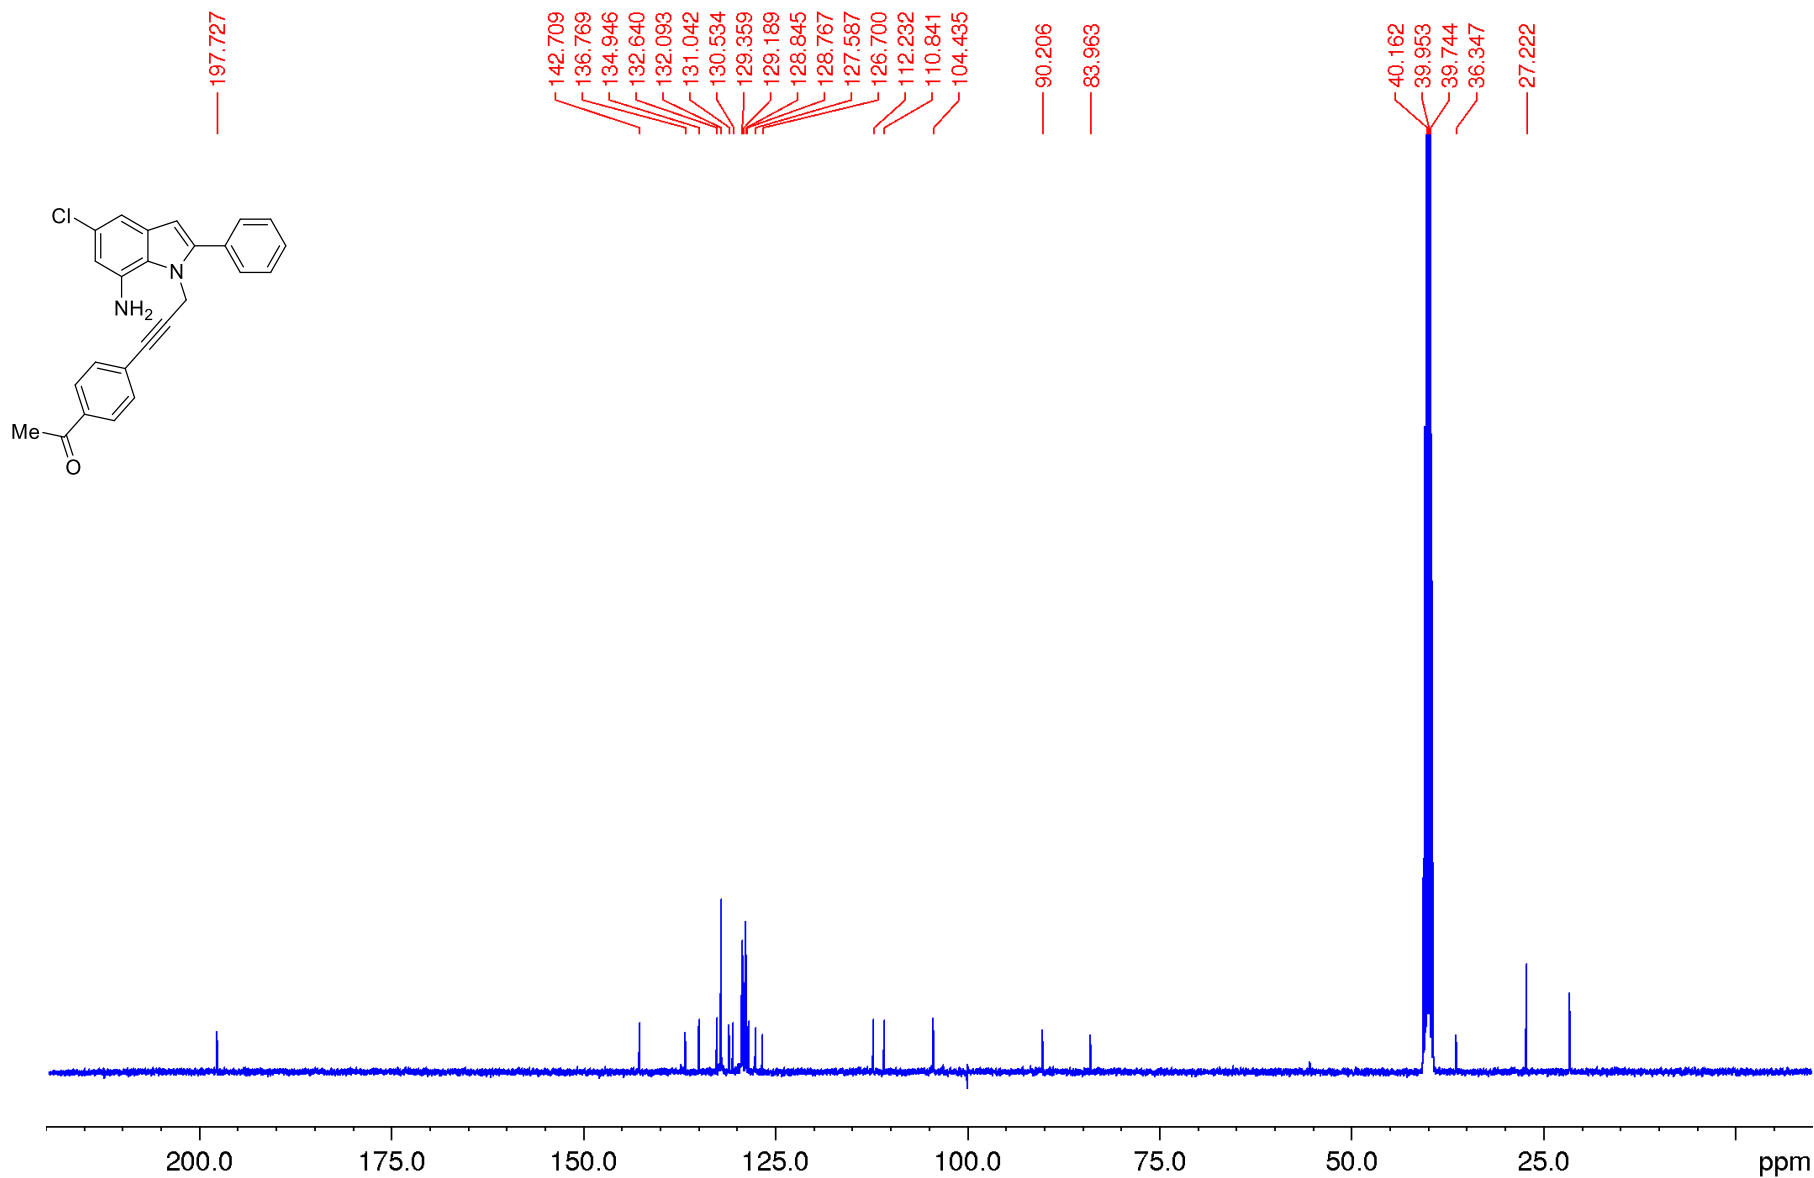



**1-(4-(3-(7-amino-5-chloro-2-phenyl-1*H*-indol-1-yl)prop-1-yn-1-yl)phenyl)ethan-1-one 1d**

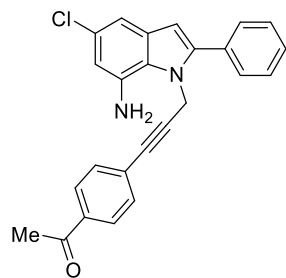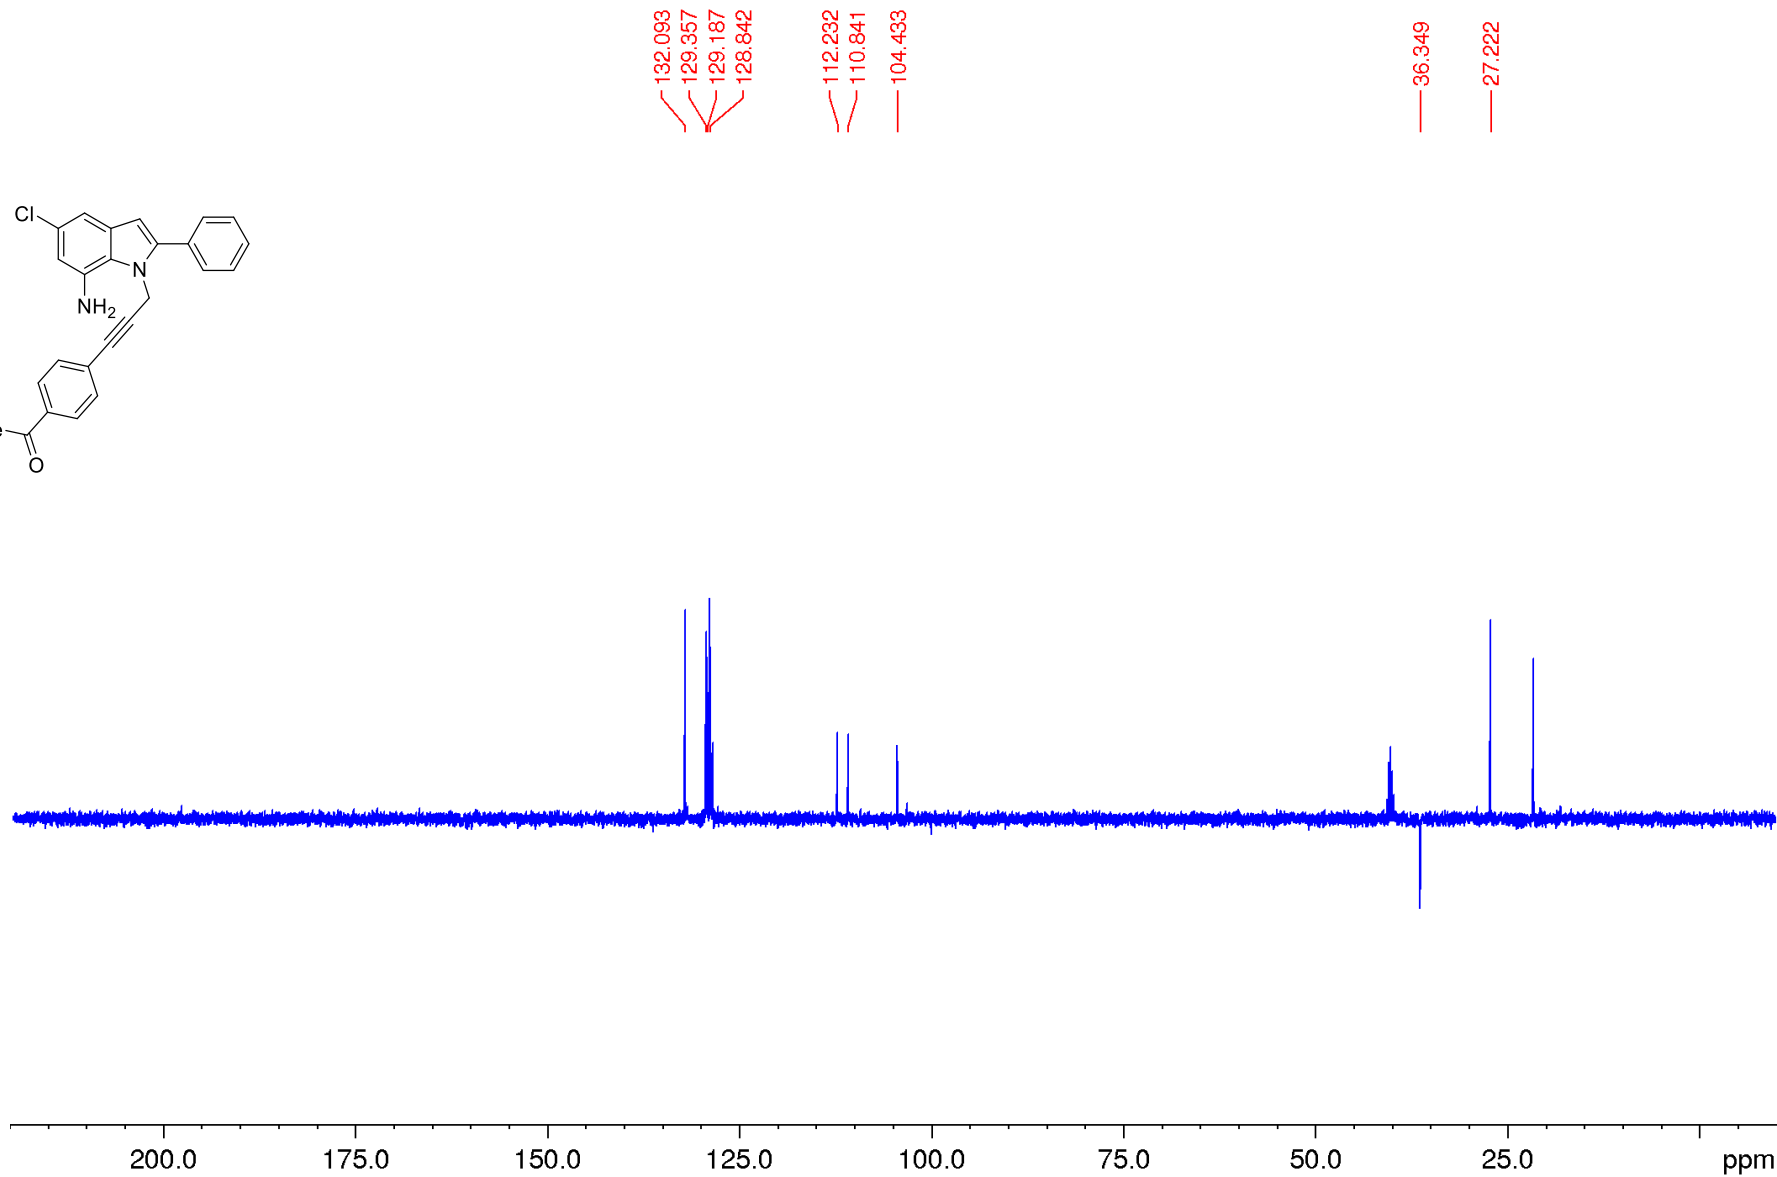

**5-chloro-2-(4-methoxyphenyl)-1-(3-(3-(trifluoromethyl)phenyl)prop-2-yn-1-yl)-1H-indol-7-amine 1e**

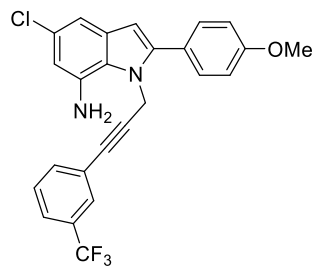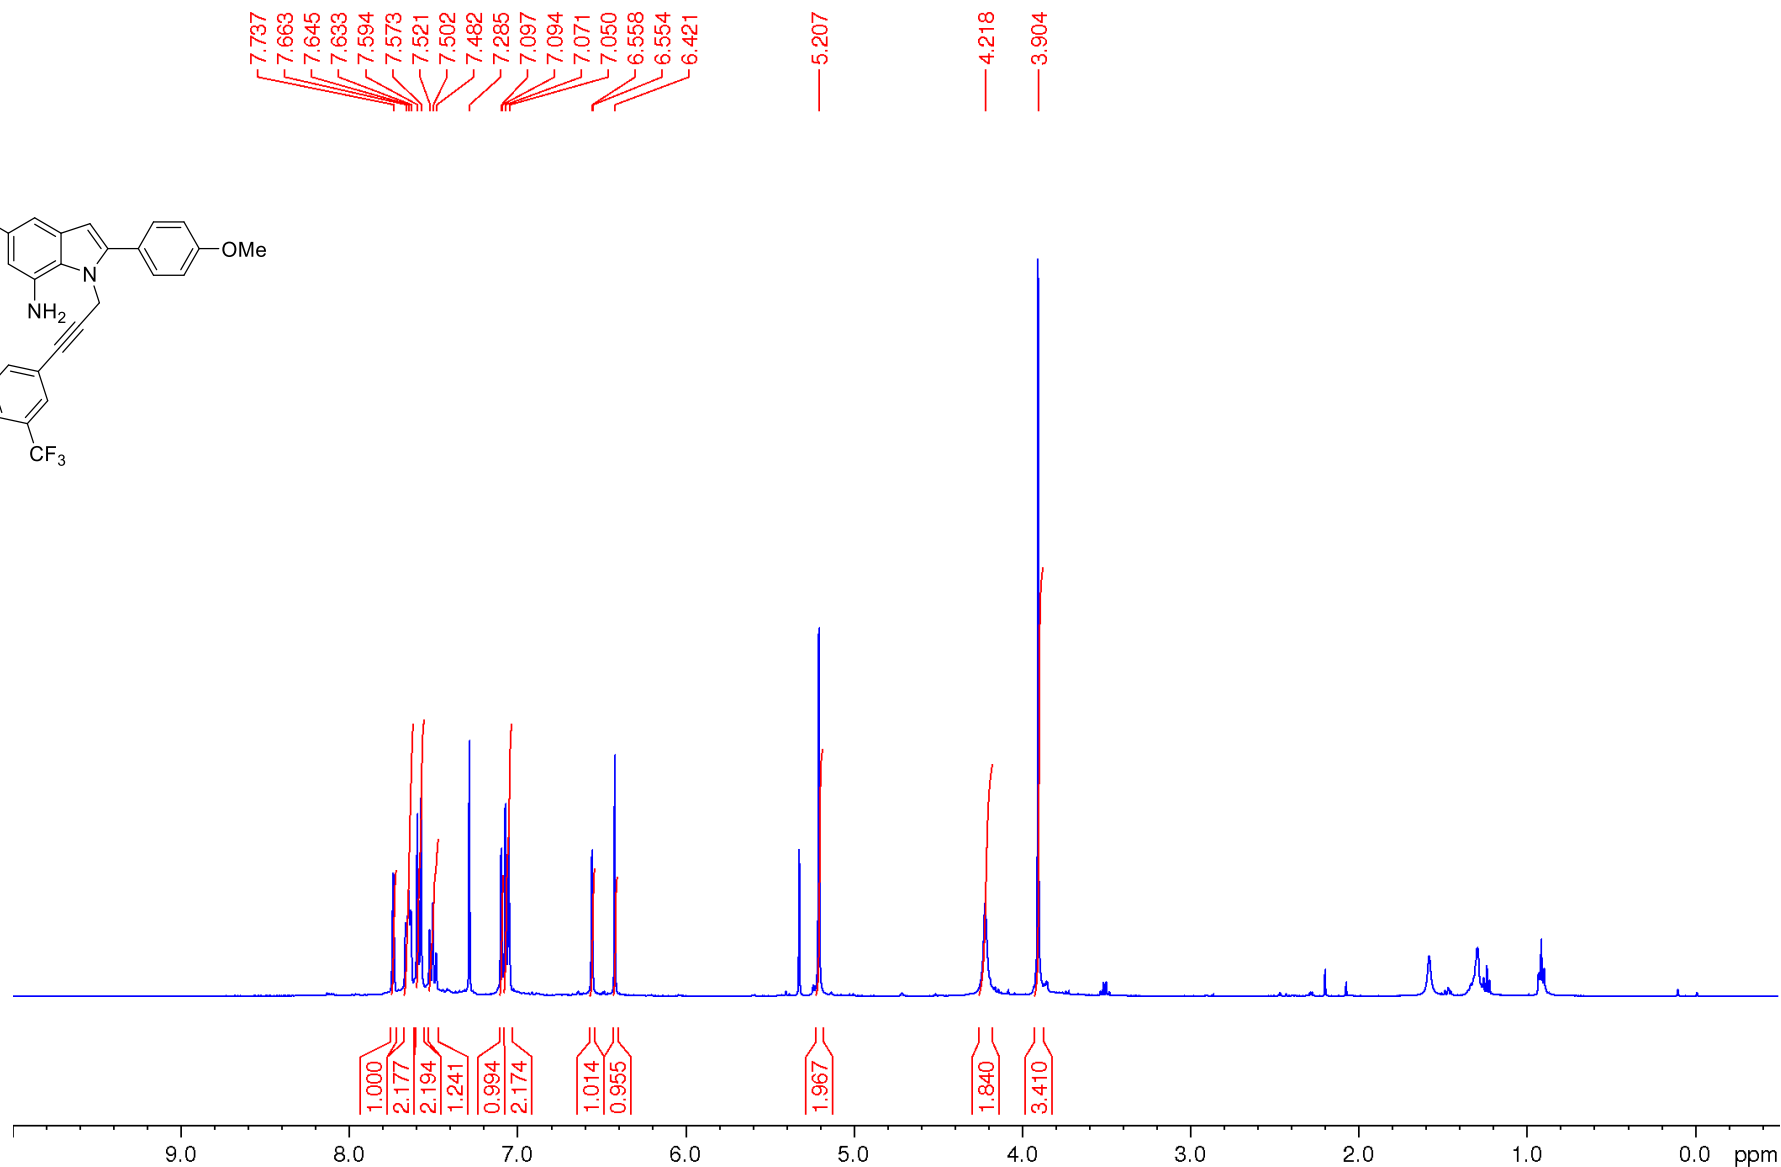

**5-chloro-2-(4-methoxyphenyl)-1-(3-(3-(trifluoromethyl)phenyl)prop-2-yn-1-yl)-1H-indol-7-amine 1e**

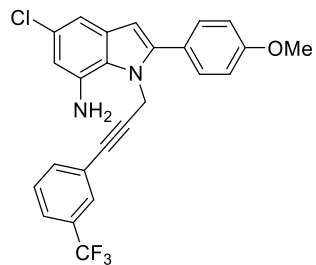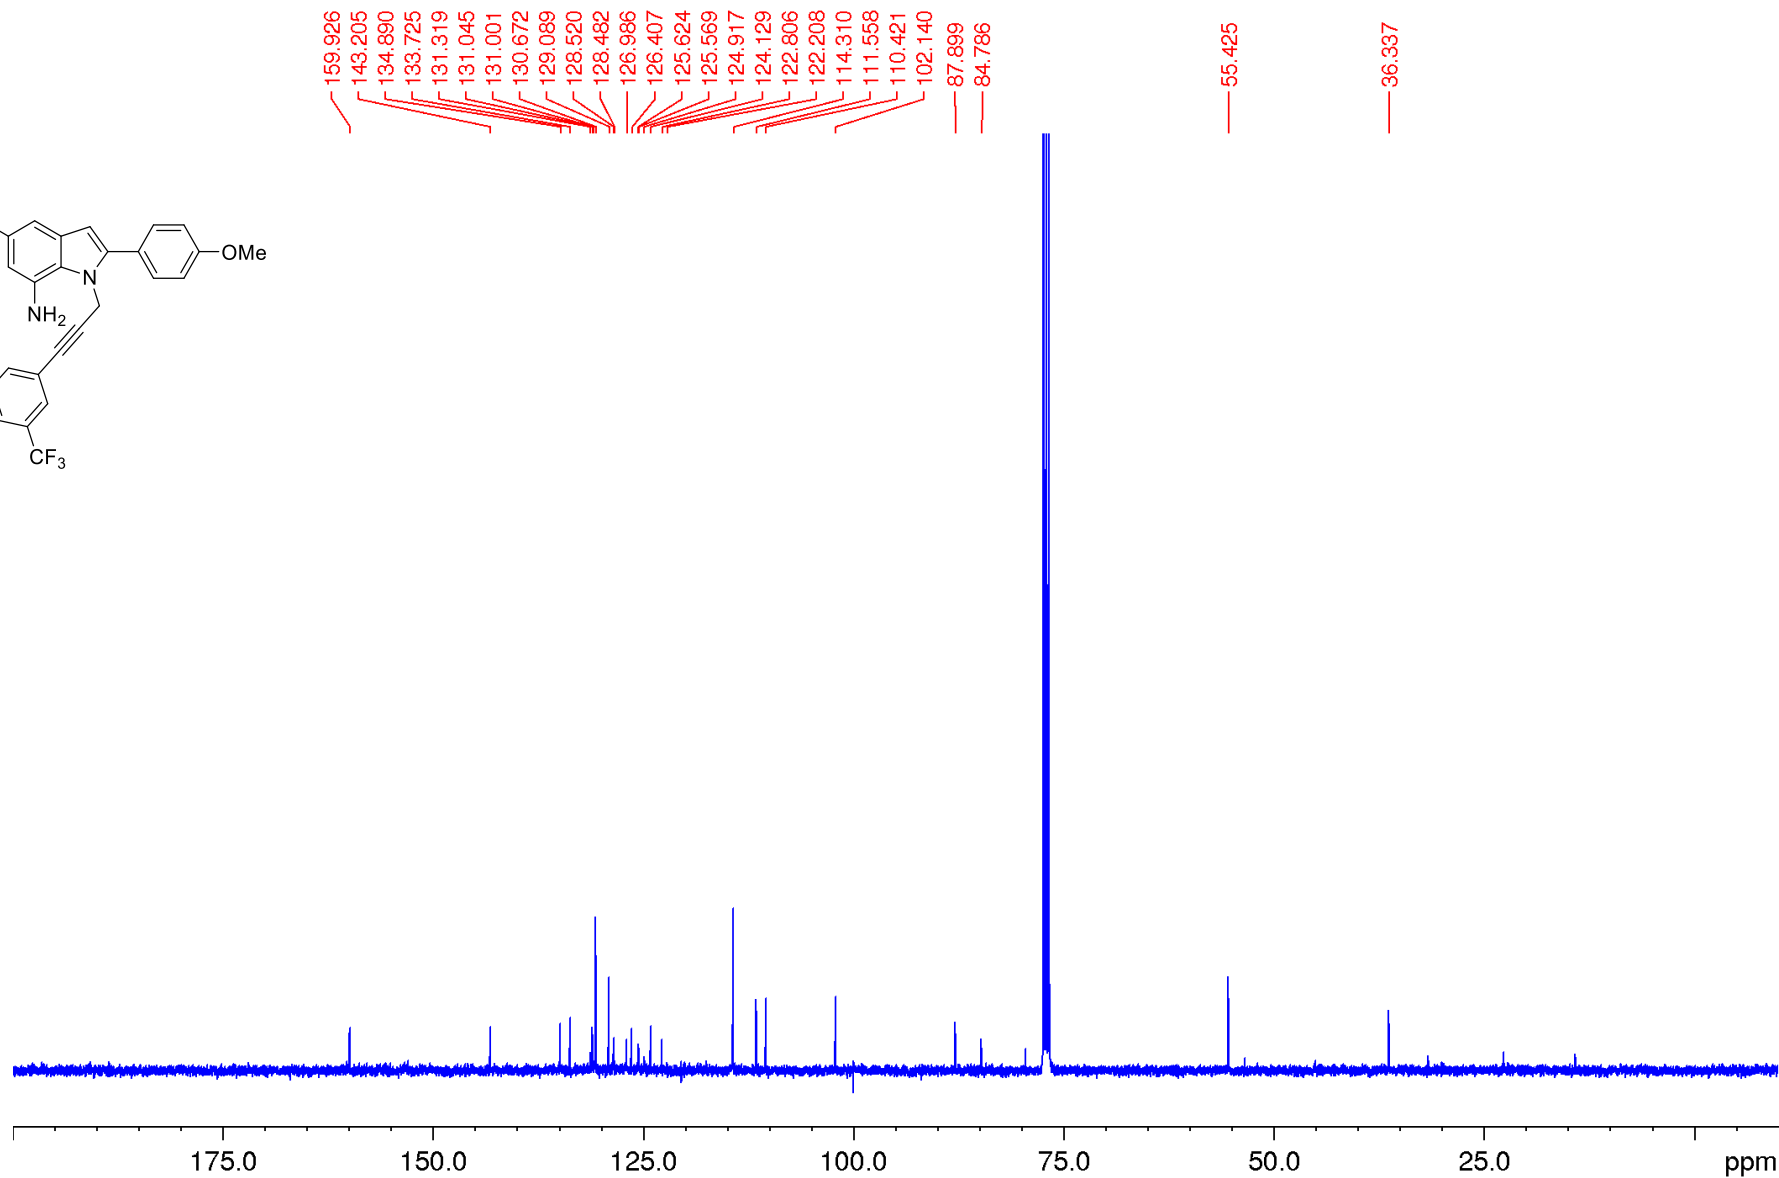

**5-chloro-2-(4-methoxyphenyl)-1-(3-(3-(trifluoromethyl)phenyl)prop-2-yn-1-yl)-1*H*-indol-7-amine 1e**



134.881  
130.672  
129.088  
128.507  
125.566

114.310  
111.557  
110.422

102.140

55.425

36.337

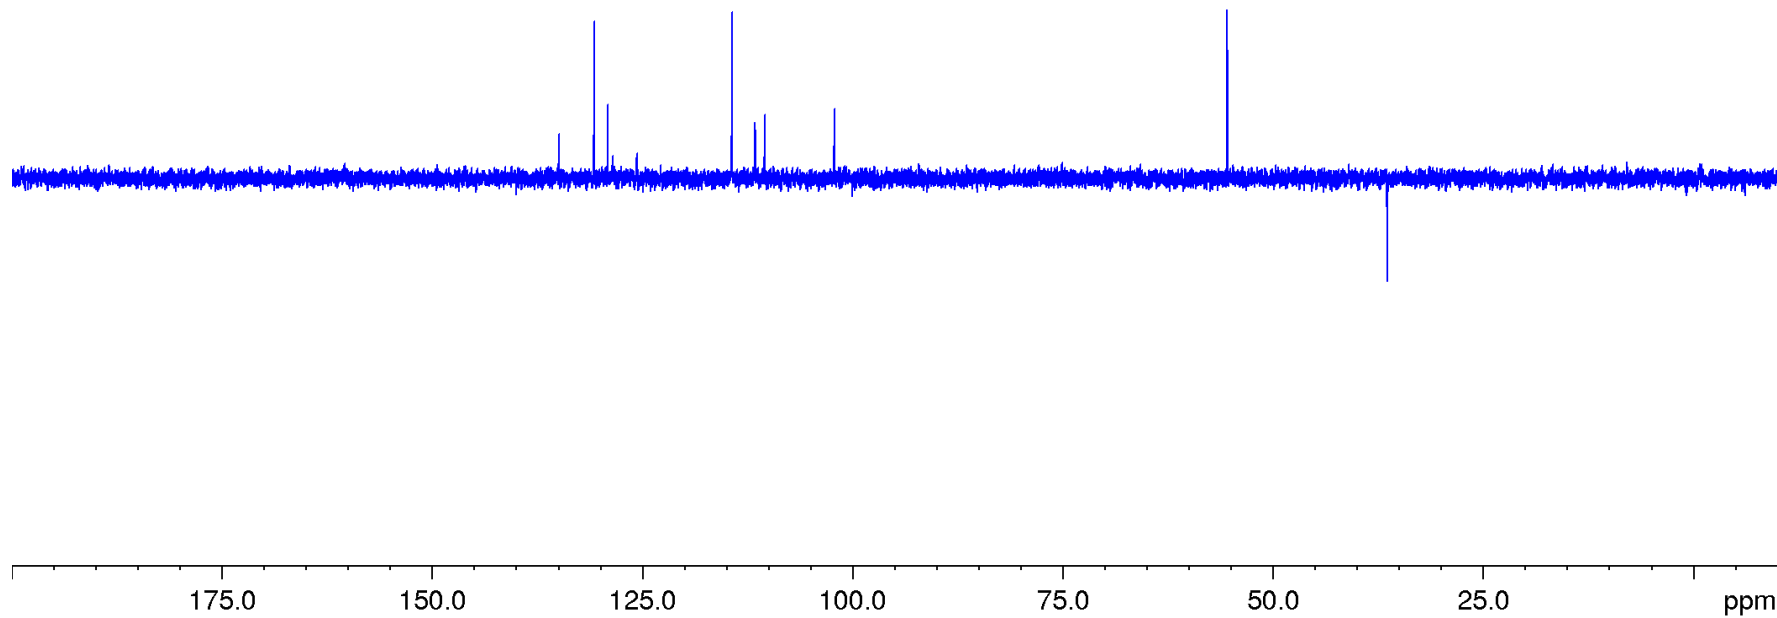

**5-chloro-2-(4-methoxyphenyl)-1-(3-(3-(trifluoromethyl)phenyl)prop-2-yn-1-yl)-1*H*-indol-7-amine 1e**

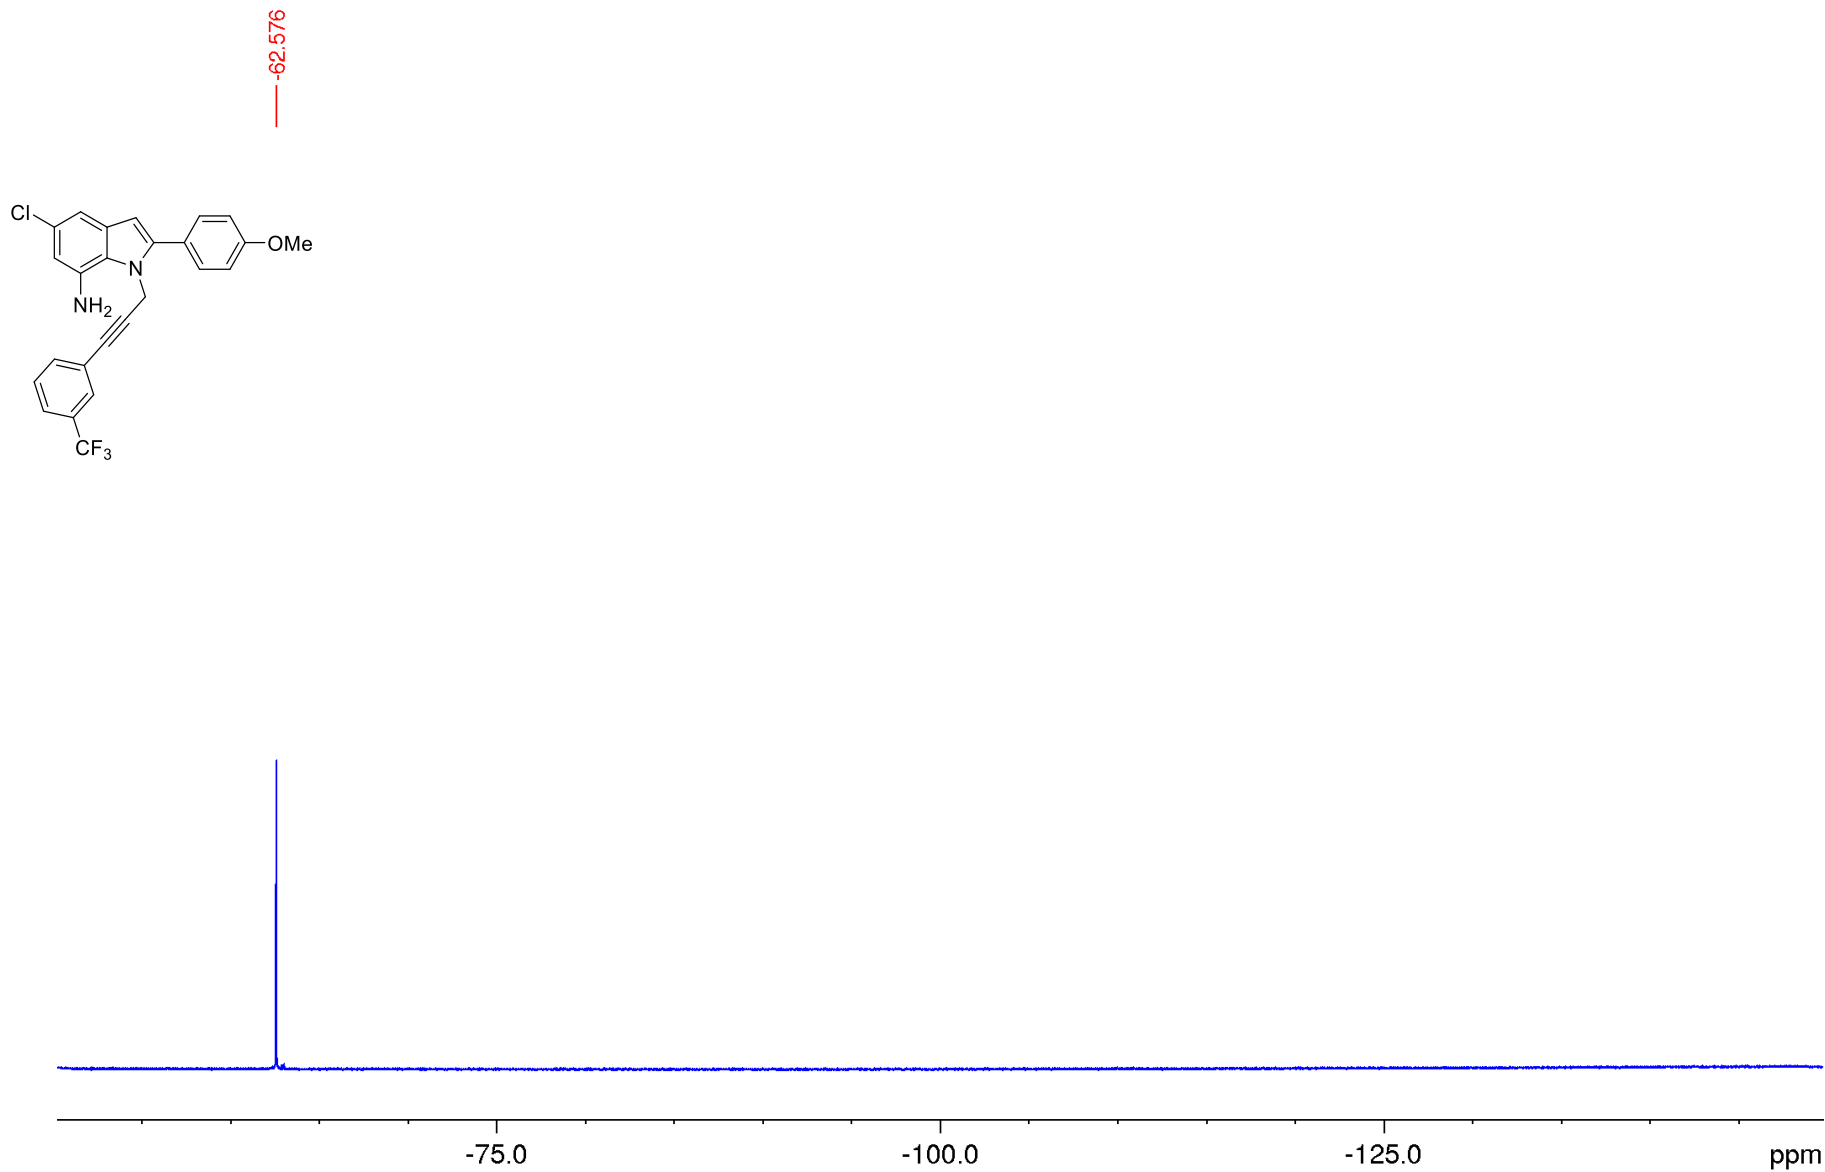

**5-cloro-2-(4-metossifenil)-1-(3-(4-metossifenil)prop-2-in-1-il)-7-ammino-1*H*-indolo amine 1f**

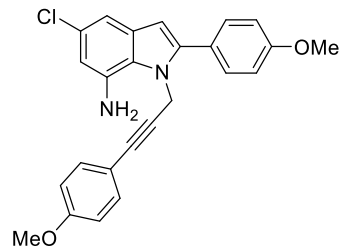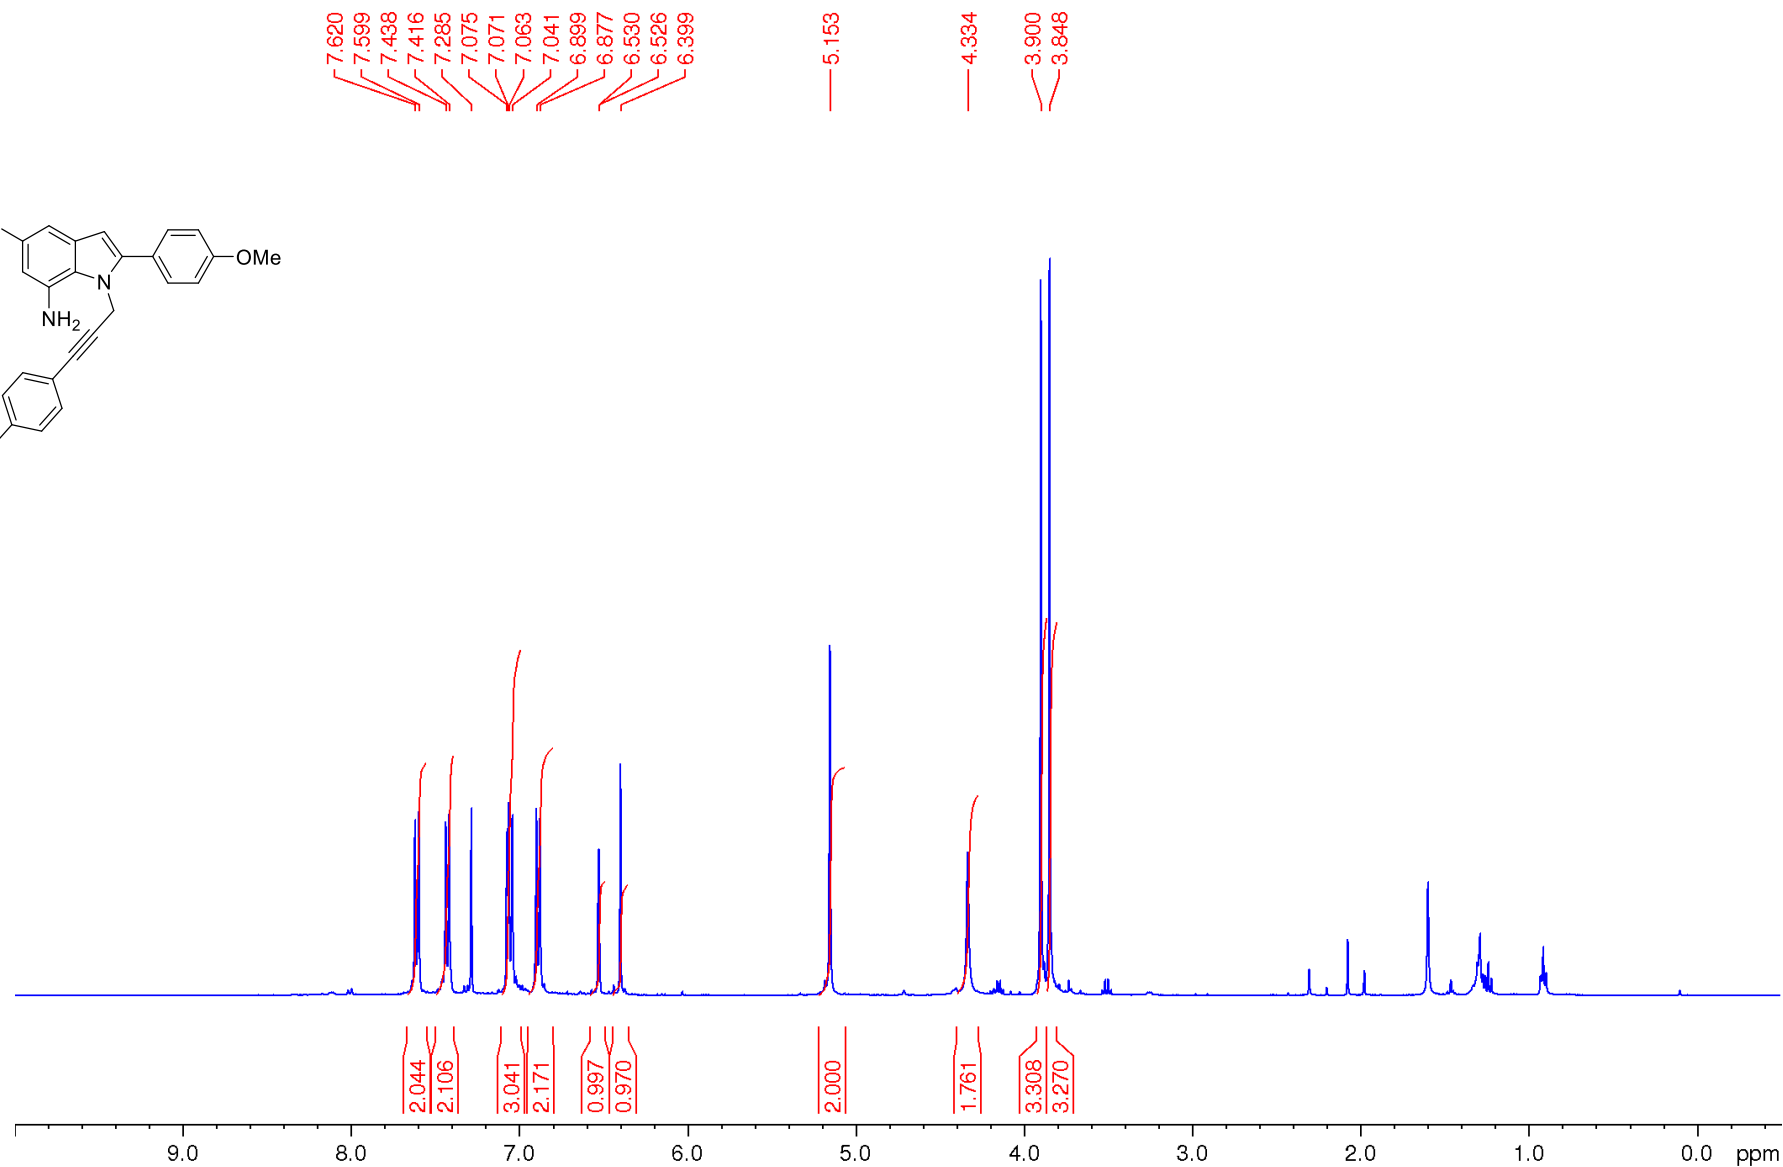

**5-cloro-2-(4-metossifenil)-1-(3-(4-metossifenil)prop-2-in-1-il)-7-ammino-1*H*-indolo amine 1f**

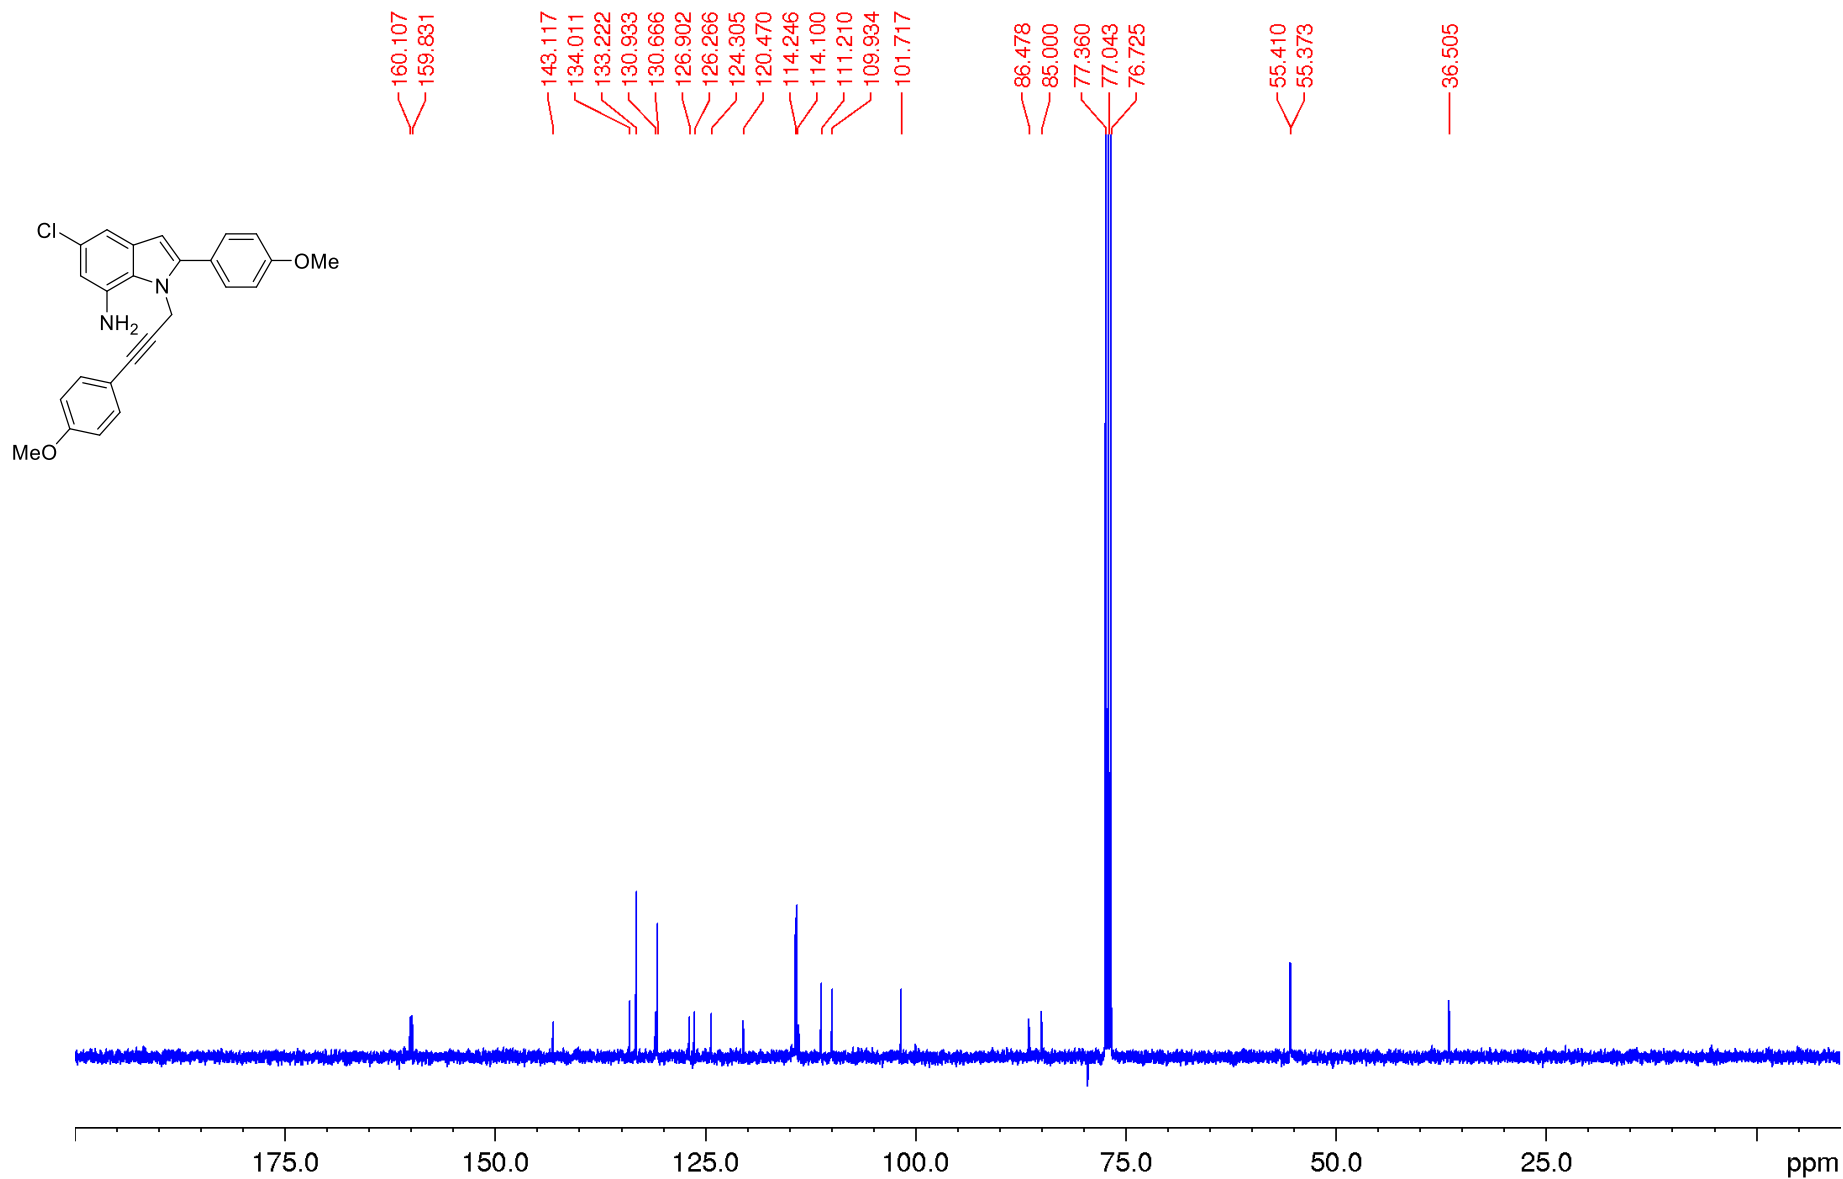

**5-cloro-2-(4-metossifenil)-1-(3-(4-metossifenil)prop-2-in-1-il)-7-ammino-1*H*-indolo amine 1f**

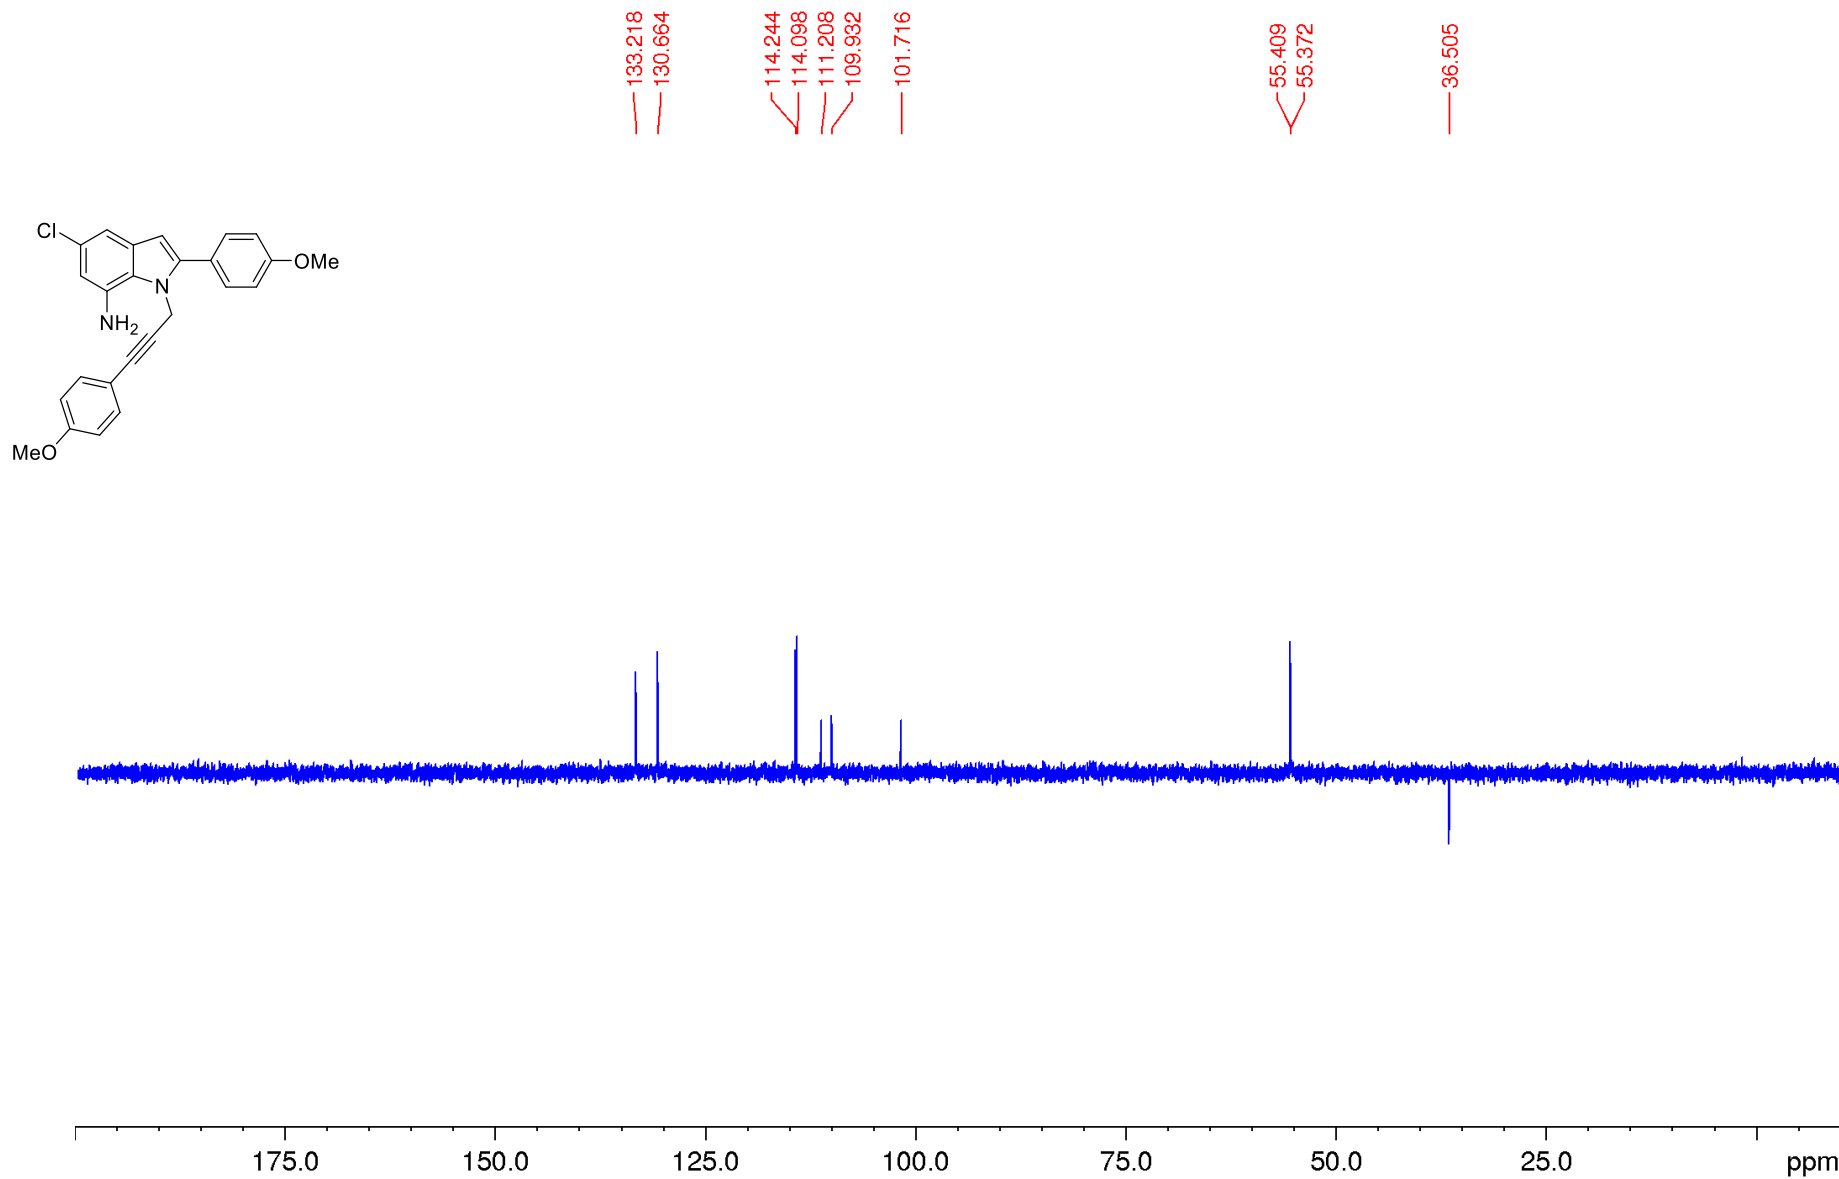



# 1-(4-(3-(7-amino-5-methyl-2-phenyl-1*H*-indol-1-yl)prop-1-yn-1-yl)phenyl)ethan-1-one 1g

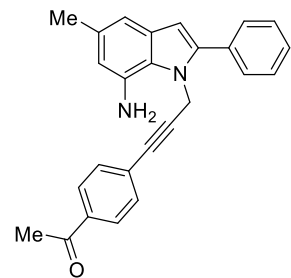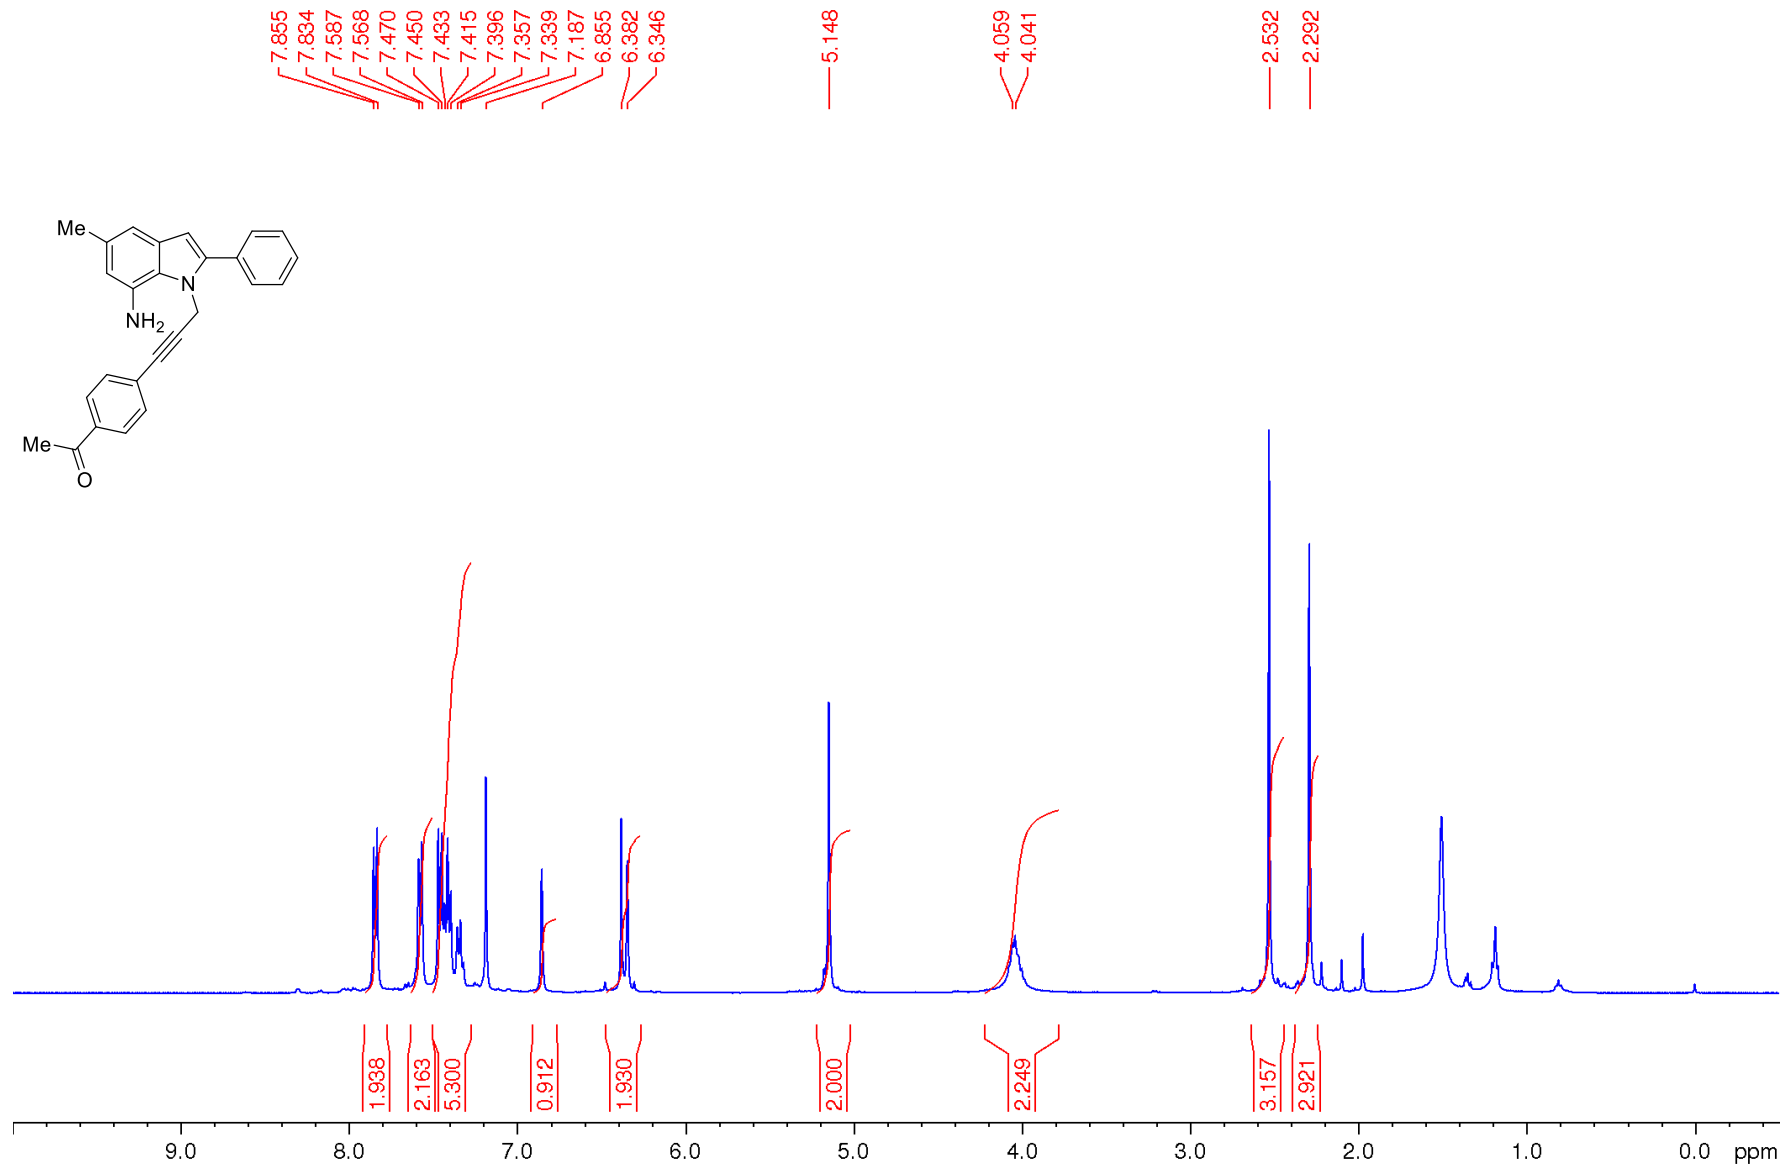

**1-(4-(3-(7-amino-5-methyl-2-phenyl-1*H*-indol-1-yl)prop-1-yn-1-yl)phenyl)ethan-1-one 1g**

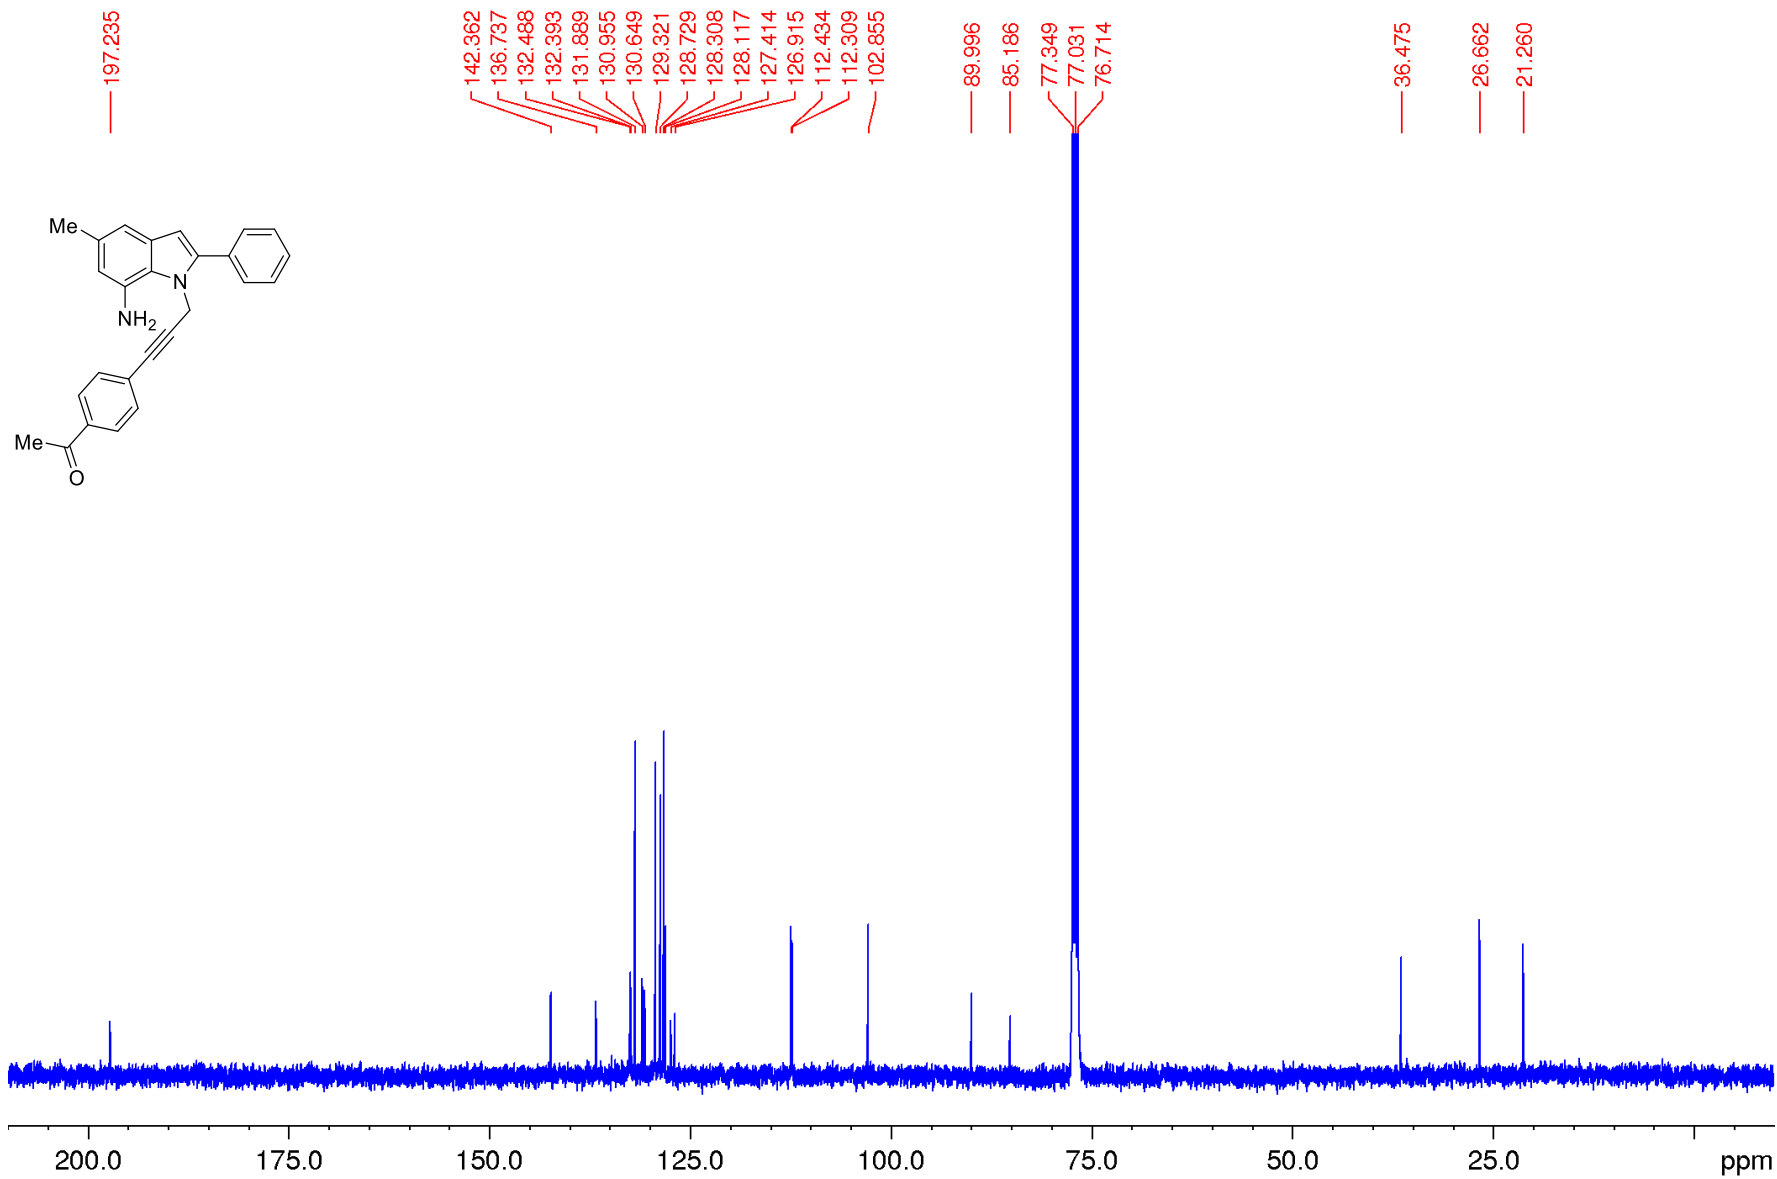

**1-(4-(3-(7-amino-5-methyl-2-phenyl-1*H*-indol-1-yl)prop-1-yn-1-yl)phenyl)ethan-1-one 1g**

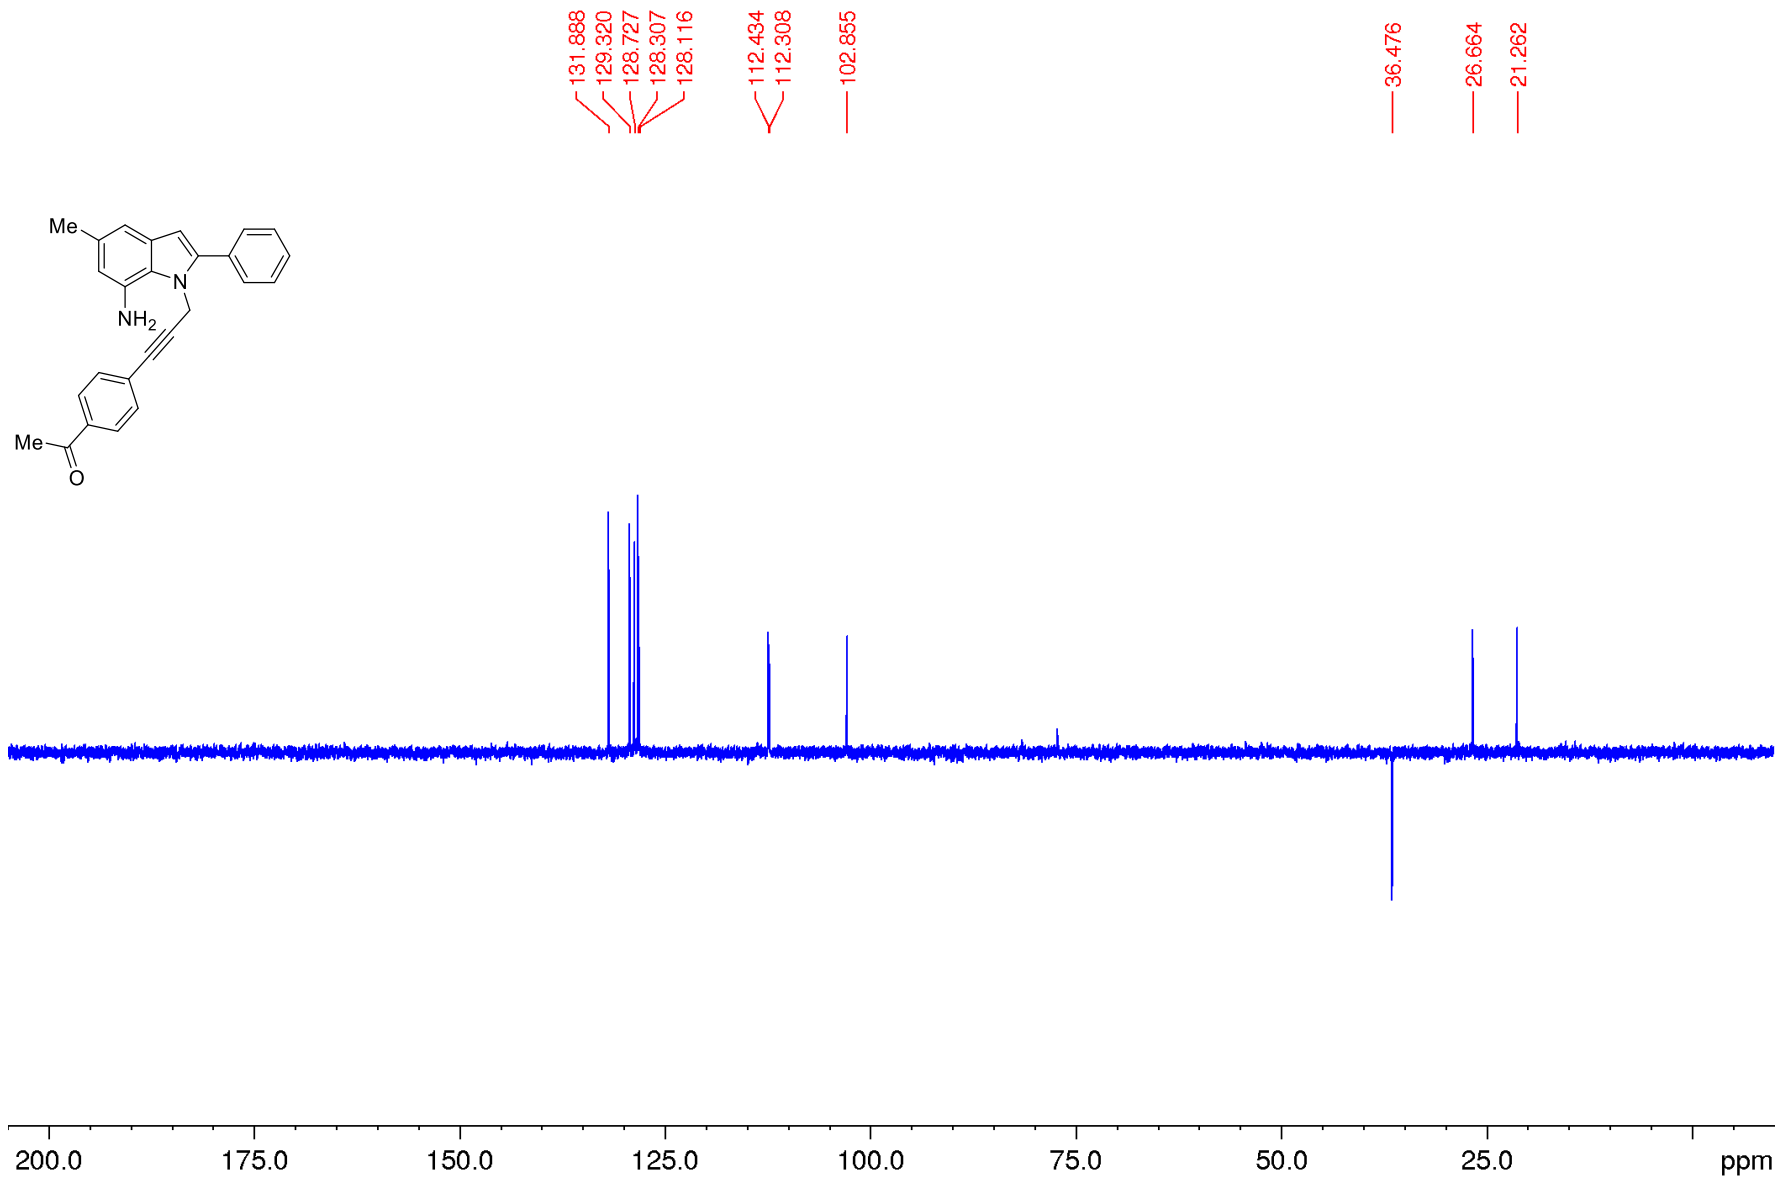

**methyl 4-(7-amino-1-(3-(4-chlorophenyl)prop-2-yn-1-yl)-5-methyl-1*H*-indol-2-yl)benzoate 1h**

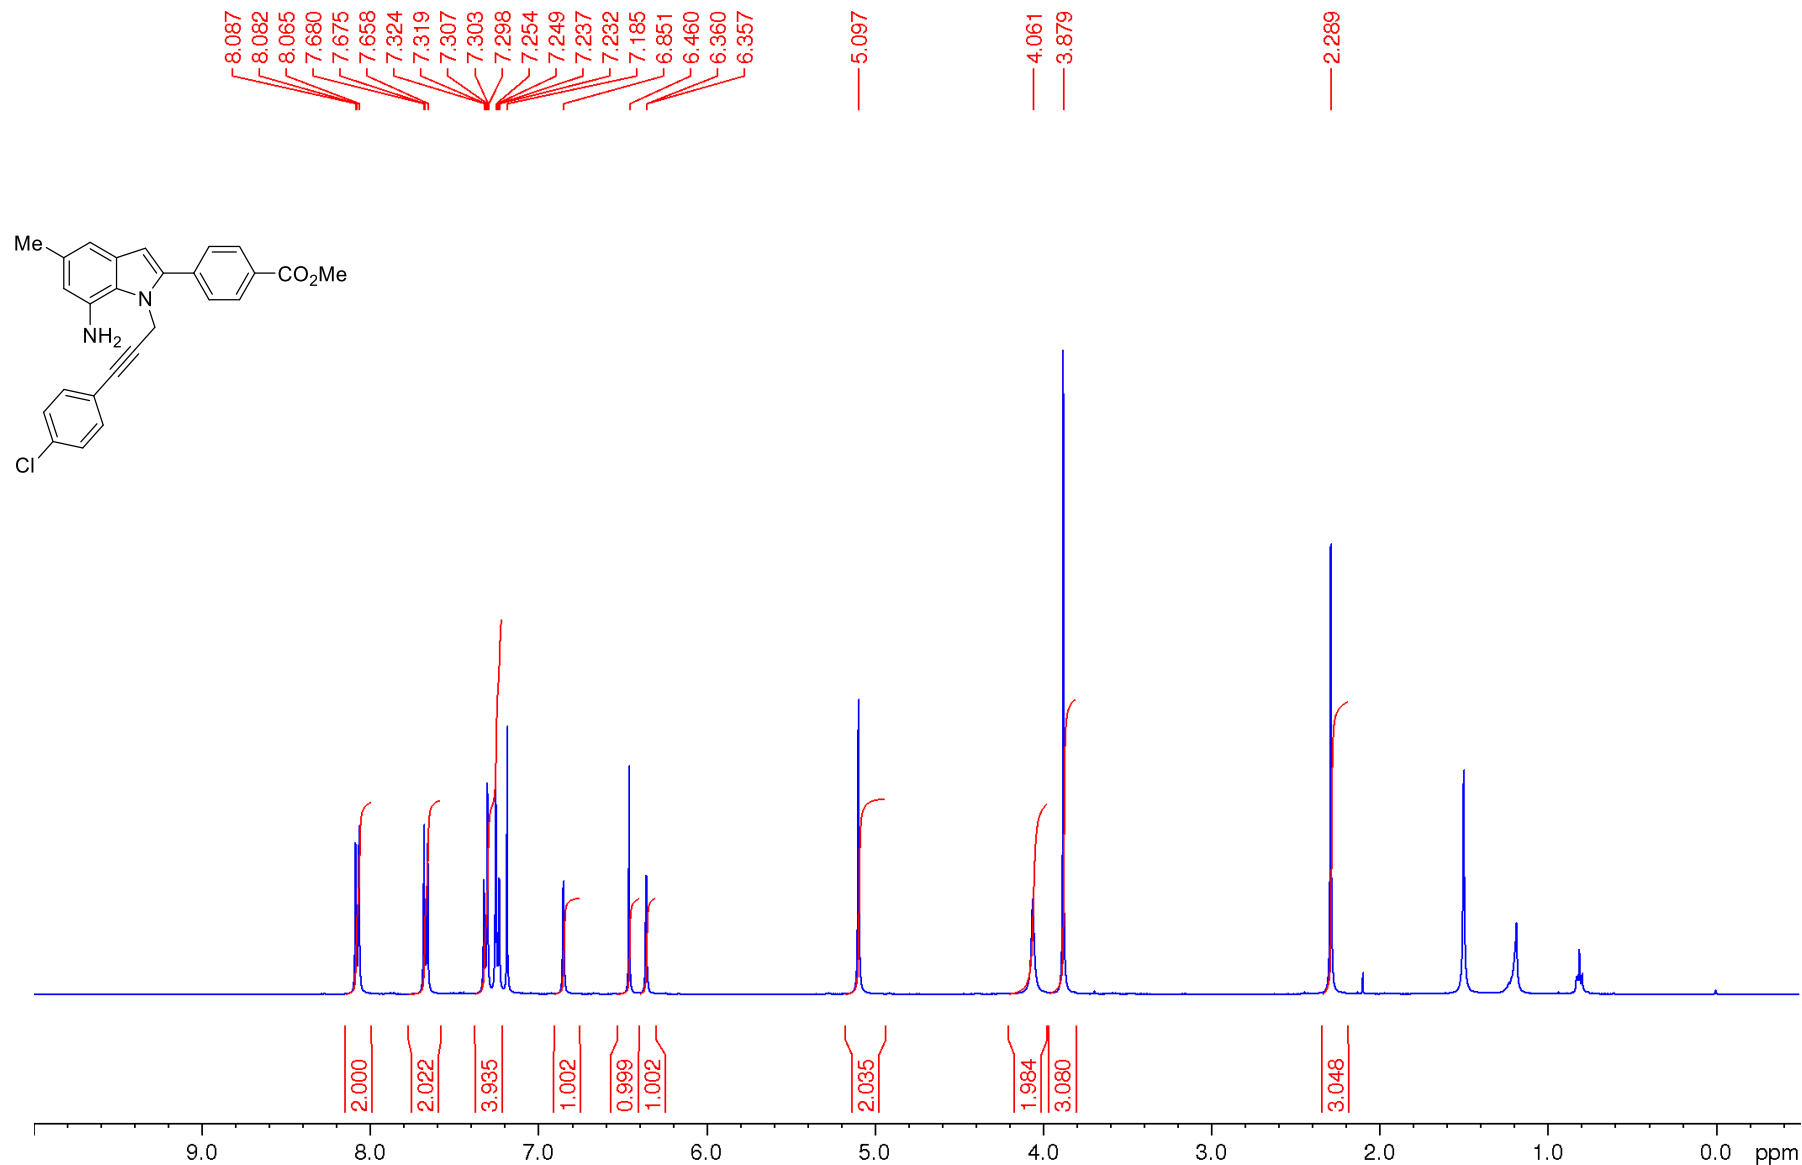

**methyl 4-(7-amino-1-(3-(4-chlorophenyl)prop-2-yn-1-yl)-5-methyl-1*H*-indol-2-yl)benzoate 1h**

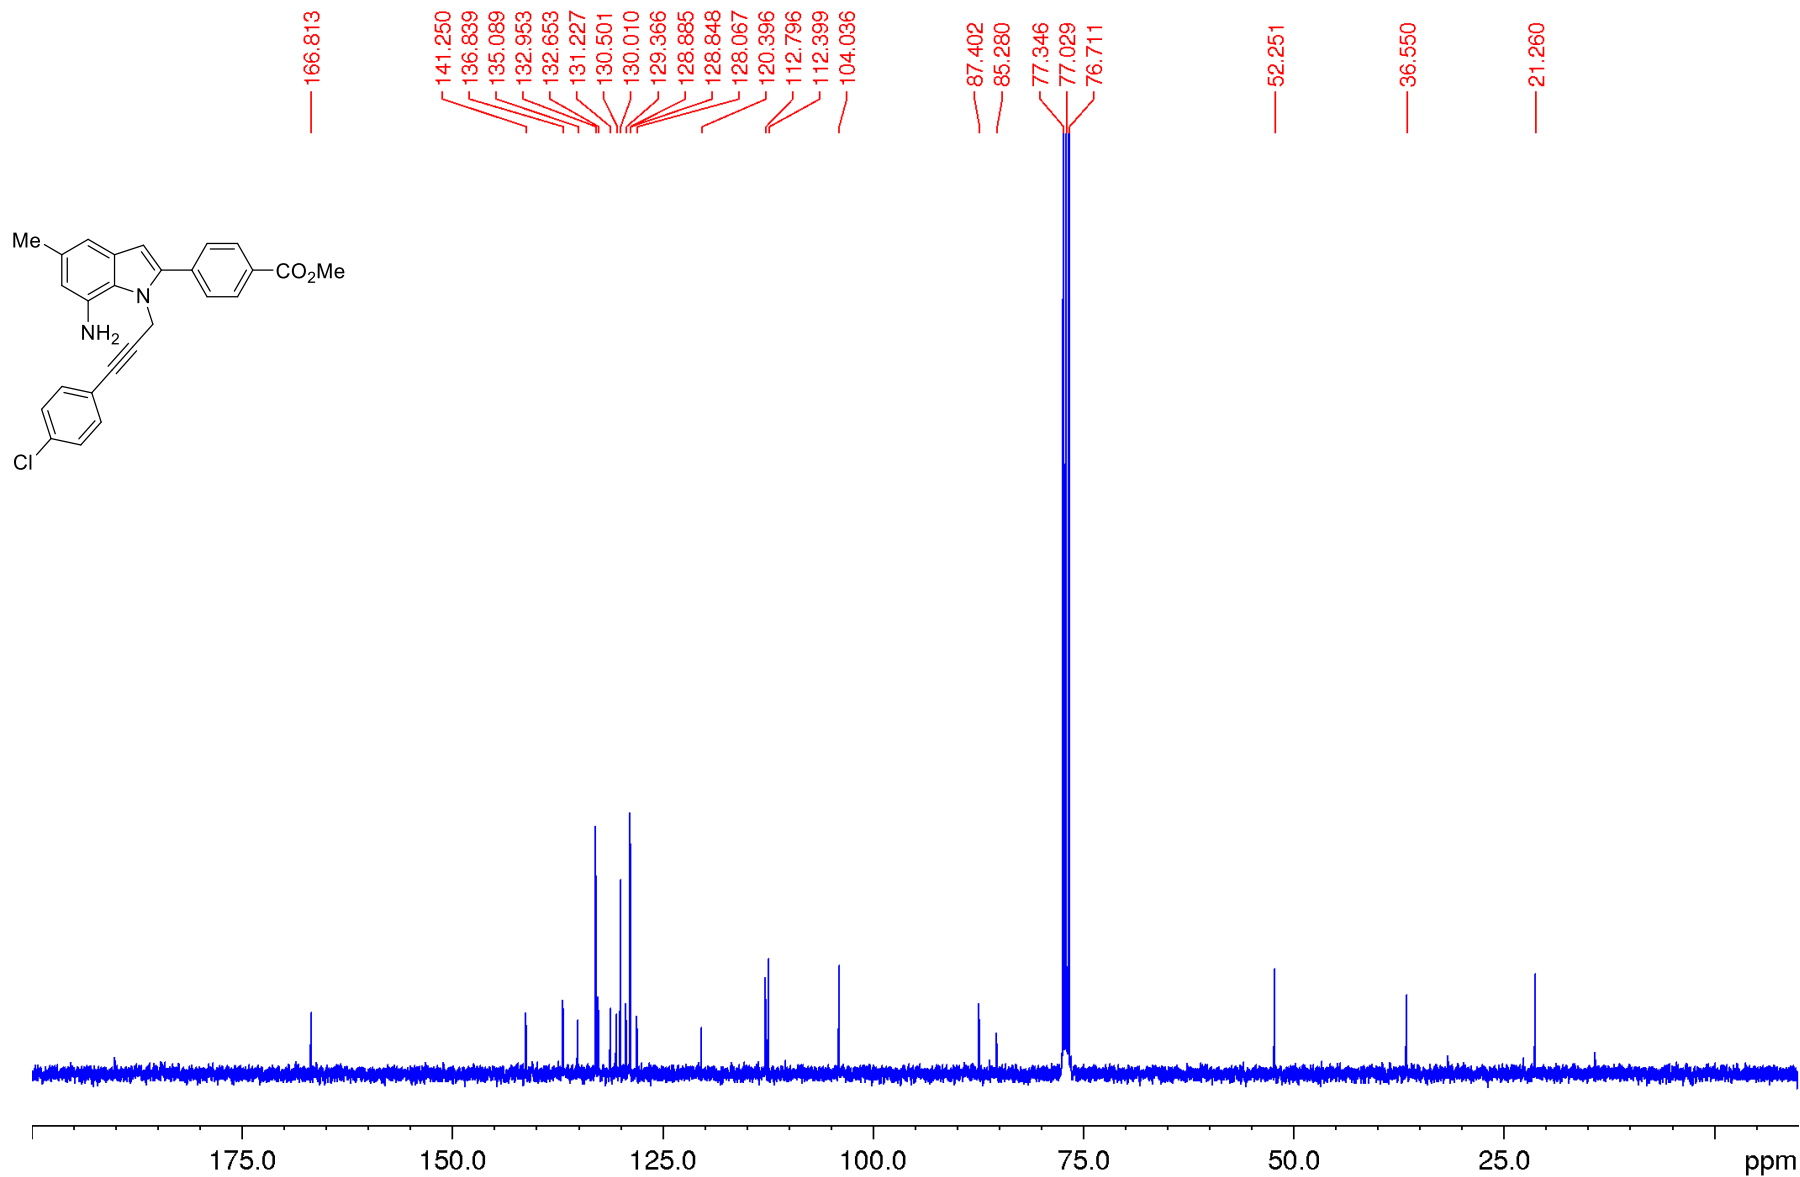

**methyl 4-(7-amino-1-(3-(4-chlorophenyl)prop-2-yn-1-yl)-5-methyl-1*H*-indol-2-yl)benzoate 1h**

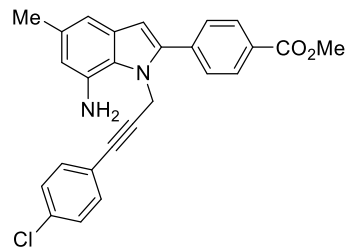

132.953  
130.010  
128.885  
128.848

112.796  
112.399  
104.036

52.251

36.549

21.259

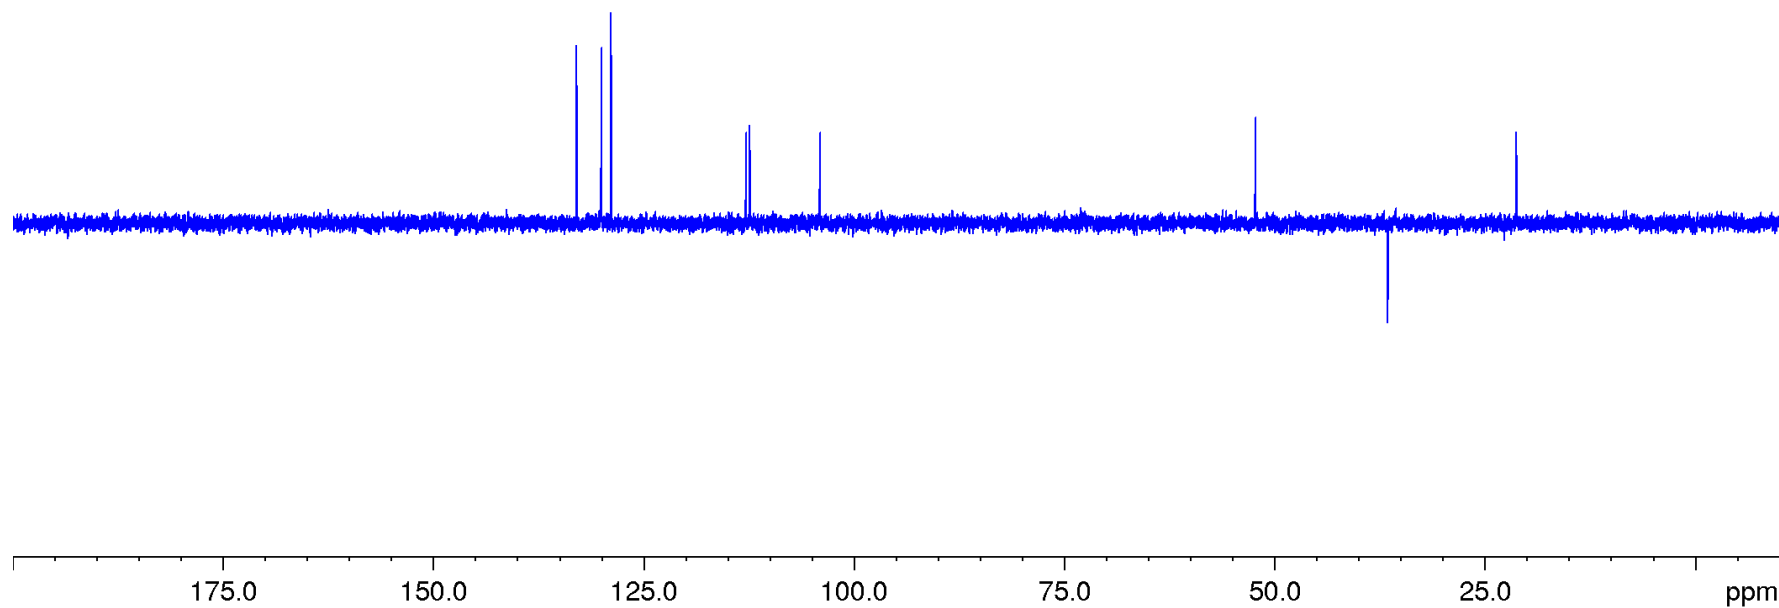

**1-(3-(4-chlorophenyl)prop-2-yn-1-yl)-5-methyl-2-phenyl-1*H*-indol-7-amine 1i**

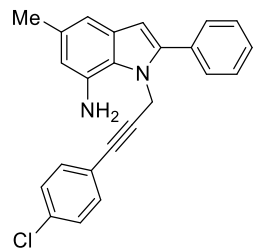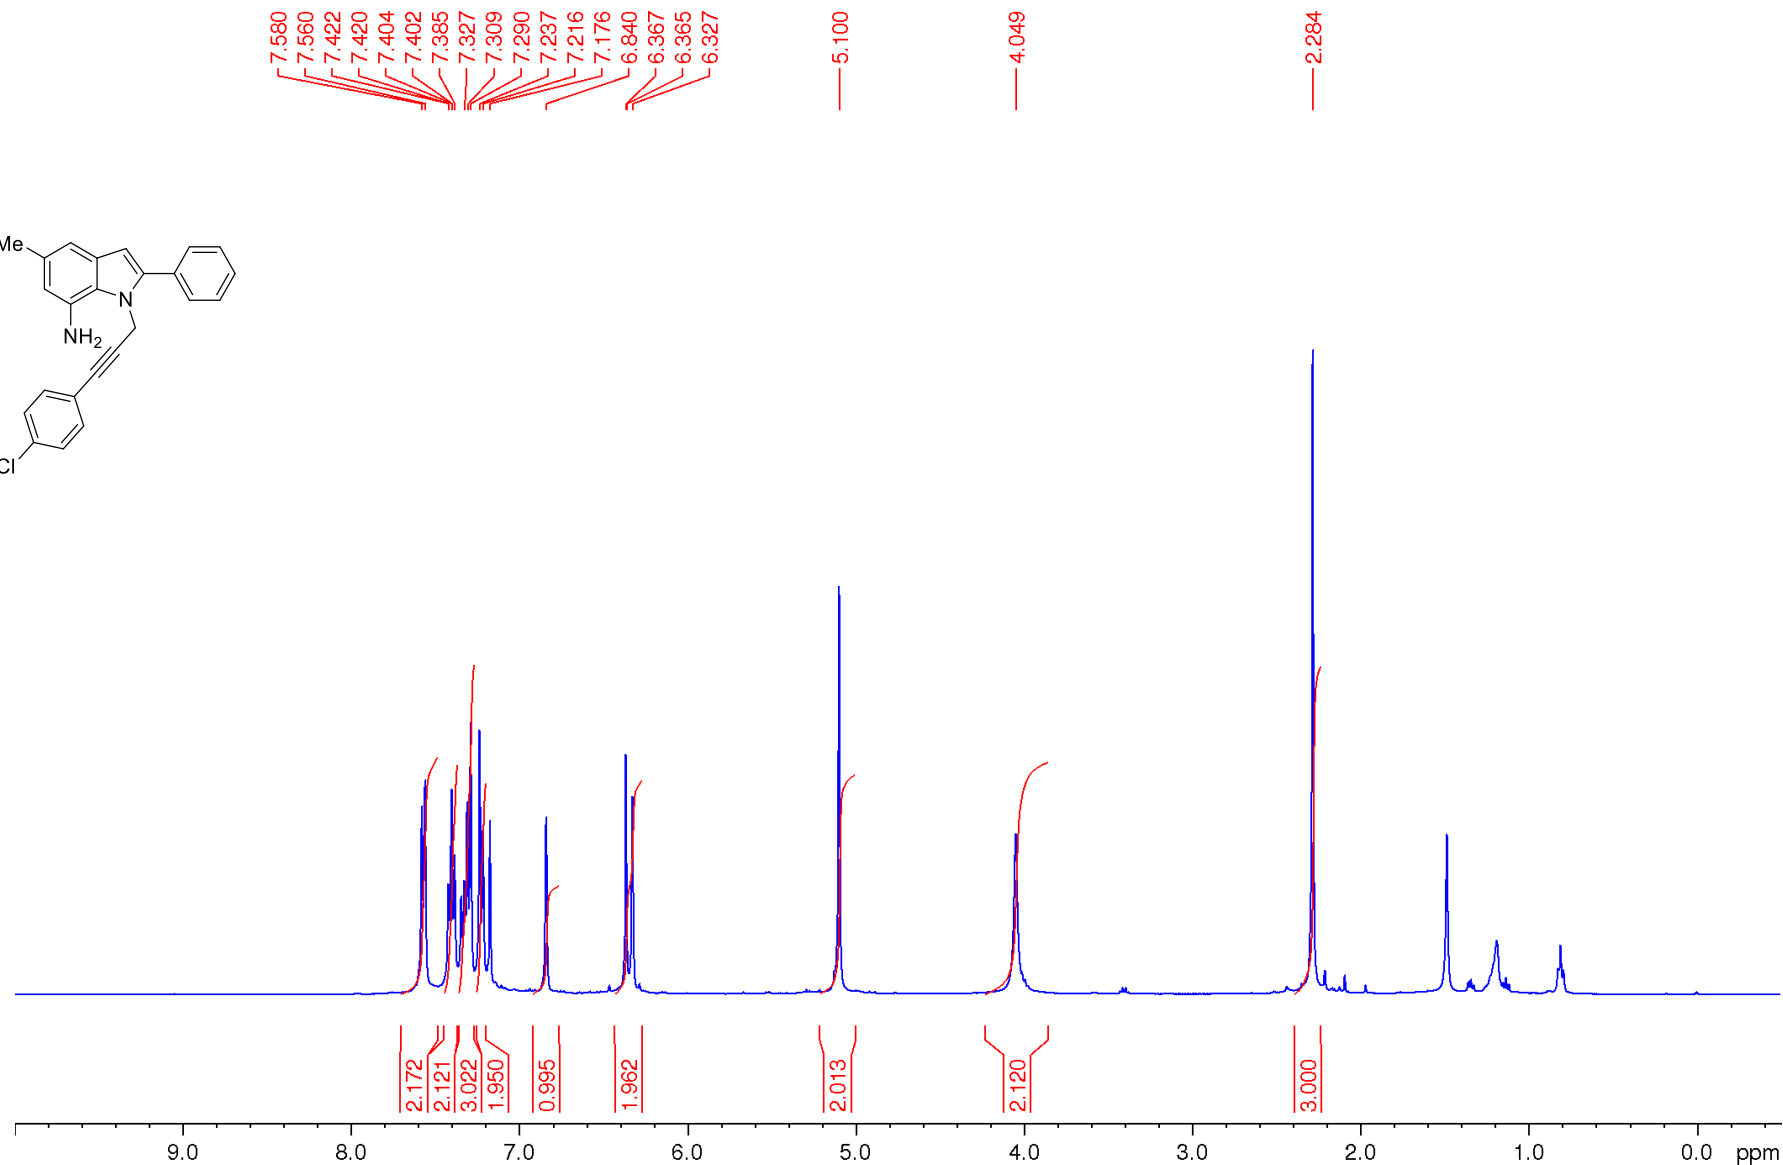

**1-(3-(4-chlorophenyl)prop-2-yn-1-yl)-5-methyl-2-phenyl-1*H*-indol-7-amine 1i**

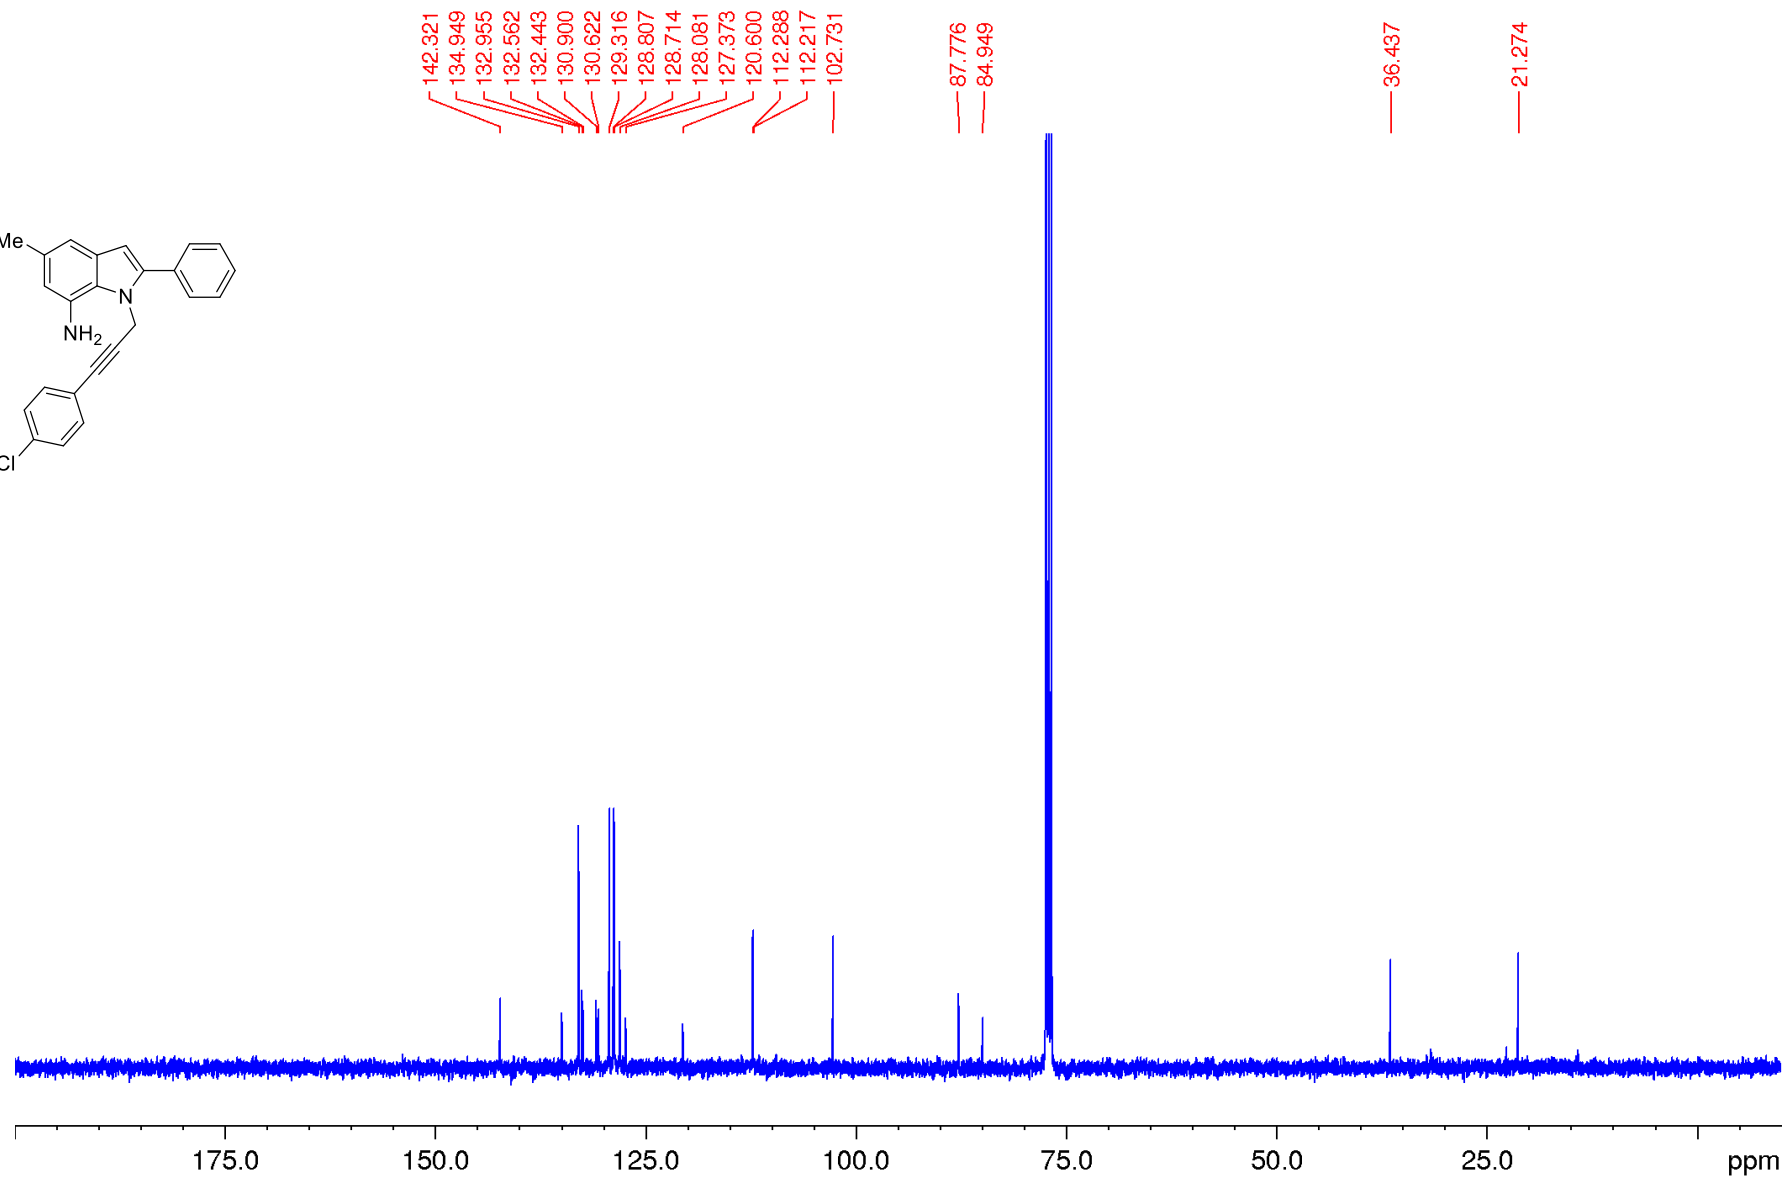



**1-(3-(4-chlorophenyl)prop-2-yn-1-yl)-5-methyl-2-phenyl-1*H*-indol-7-amine 1i**



132.955  
129.315  
128.806  
128.714  
128.081  
112.287  
112.216  
102.731  
36.436  
21.273

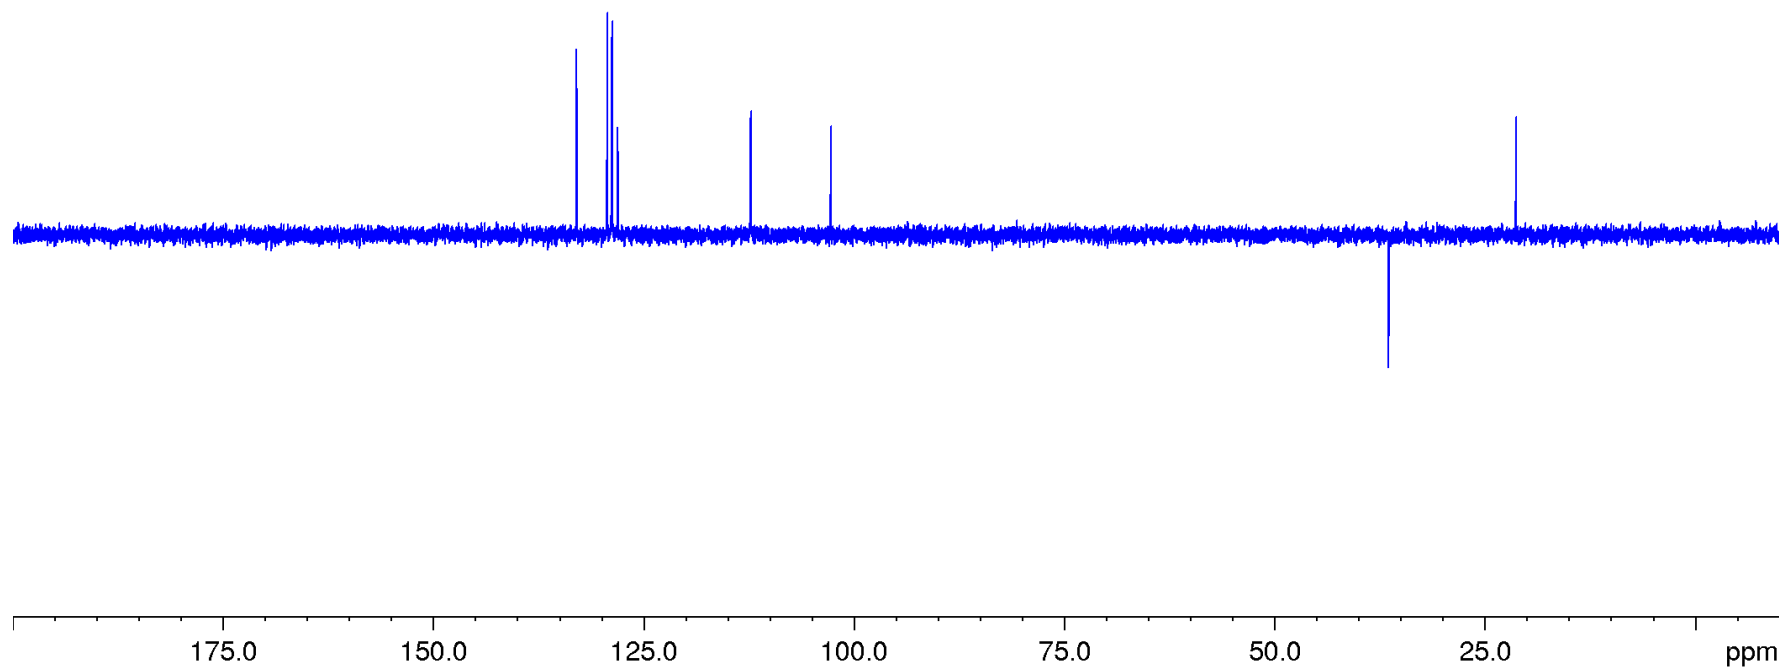

# 5-methyl-2-phenyl-1-(prop-2-yn-1-yl)-1H-indol-7-amine 1j

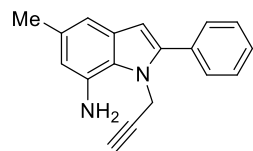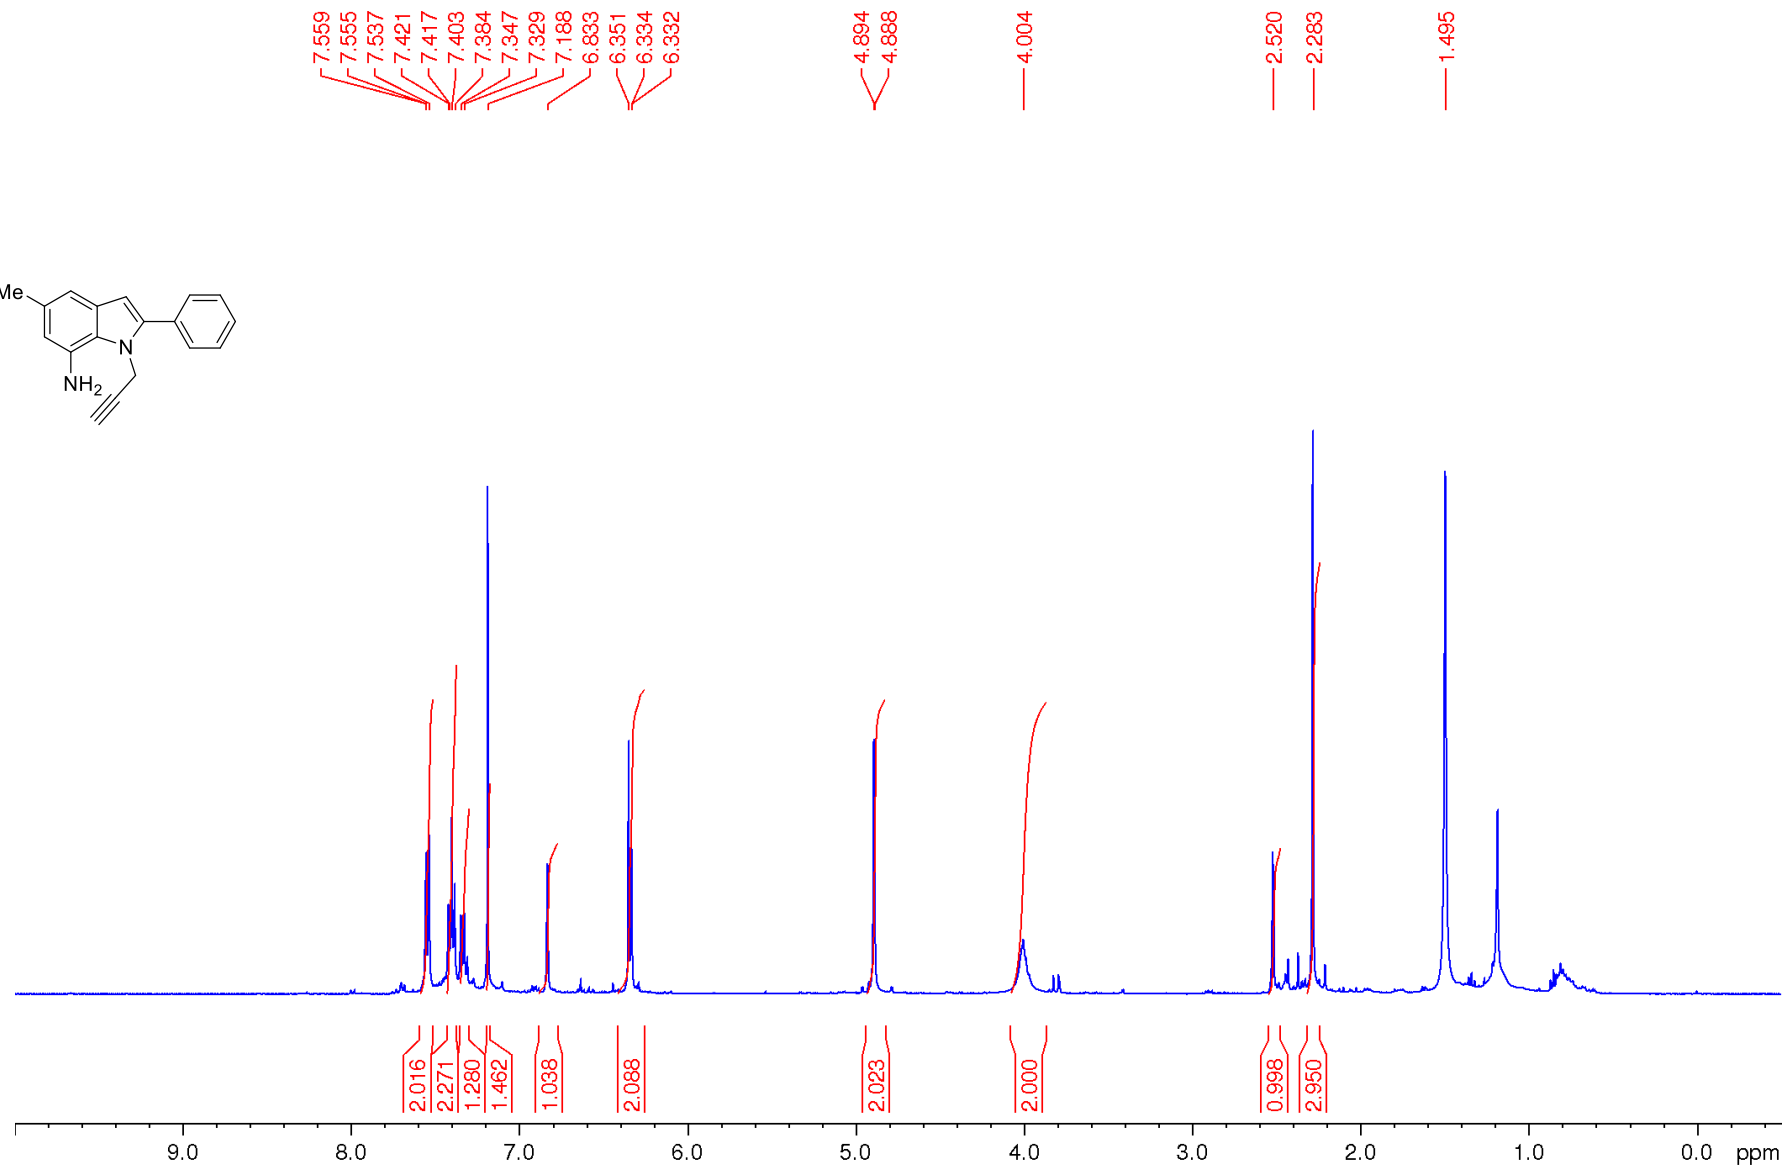

# 5-methyl-2-phenyl-1-(prop-2-yn-1-yl)-1H-indol-7-amine 1j

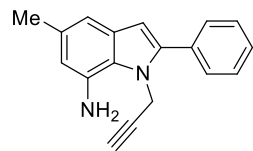

142.369  
132.522  
132.350  
130.899  
130.634  
129.262  
128.679  
128.065  
127.462  
112.429  
112.260  
102.798  
81.907  
74.379  
35.658  
21.243

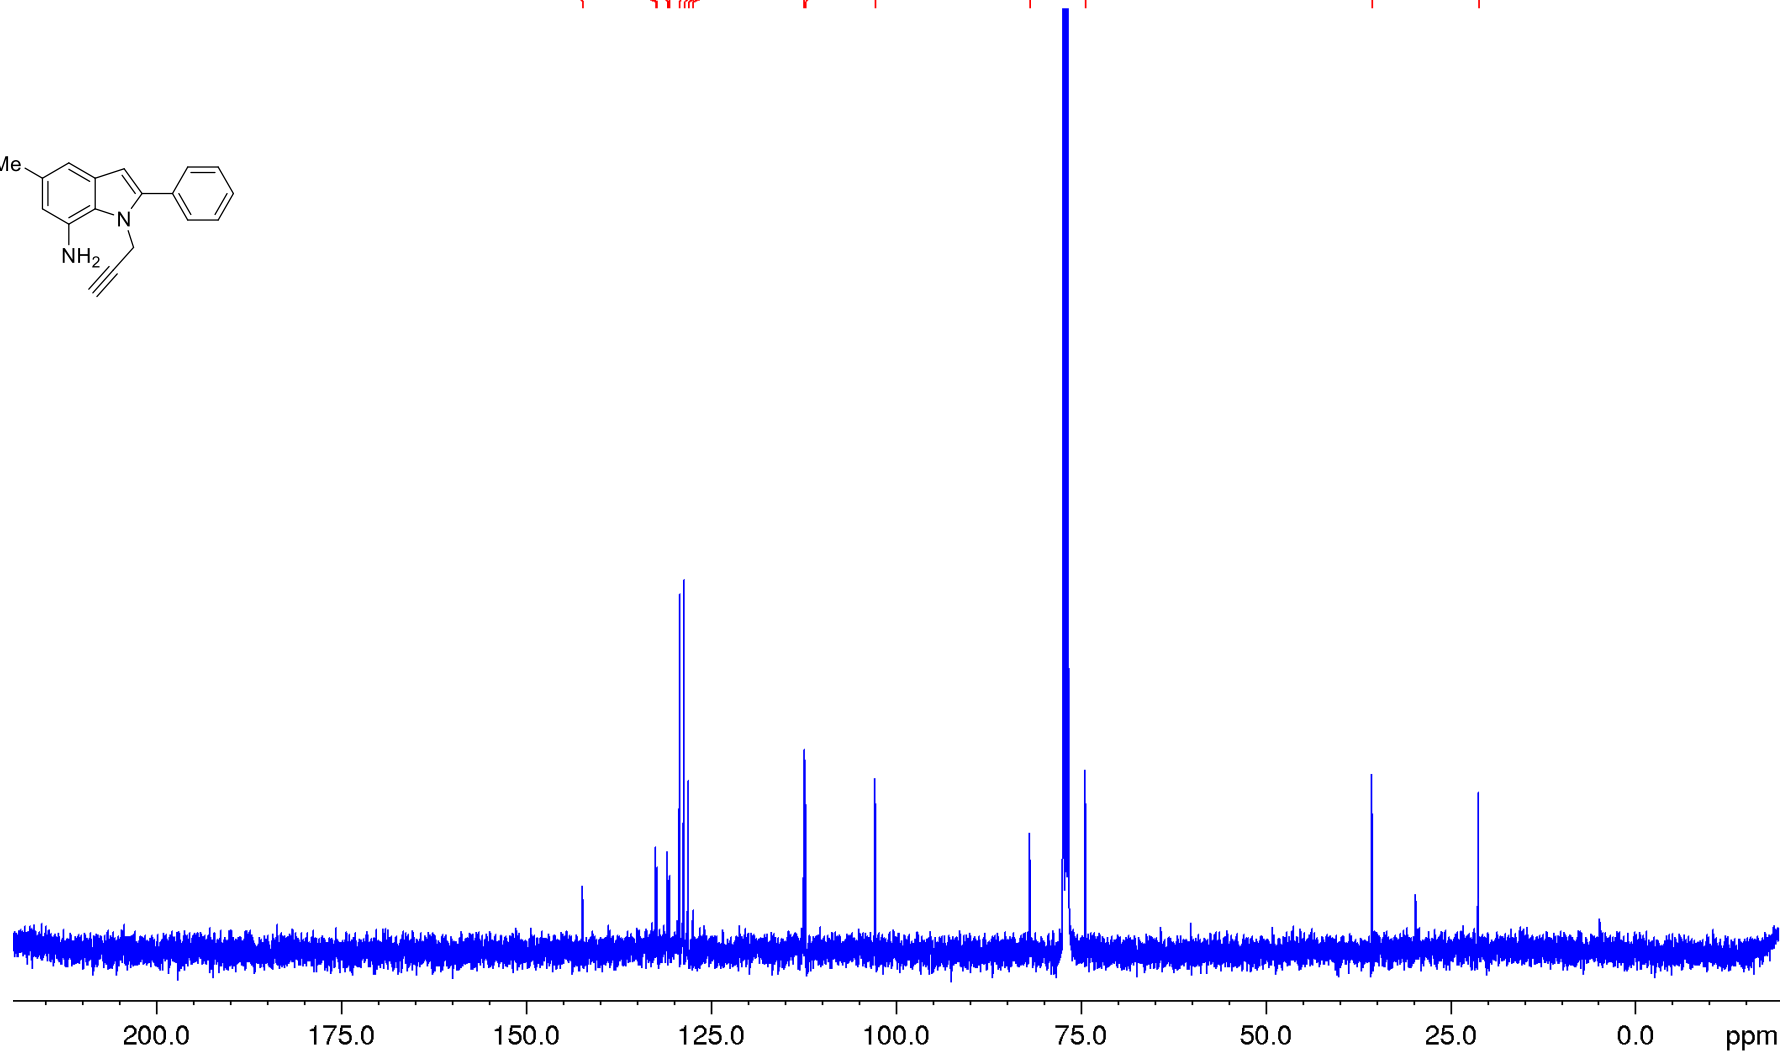

# 5-methyl-2-phenyl-1-(prop-2-yn-1-yl)-1H-indol-7-amine 1j



129.259  
128.676  
128.062

112.428  
112.259

102.798

35.659

21.246

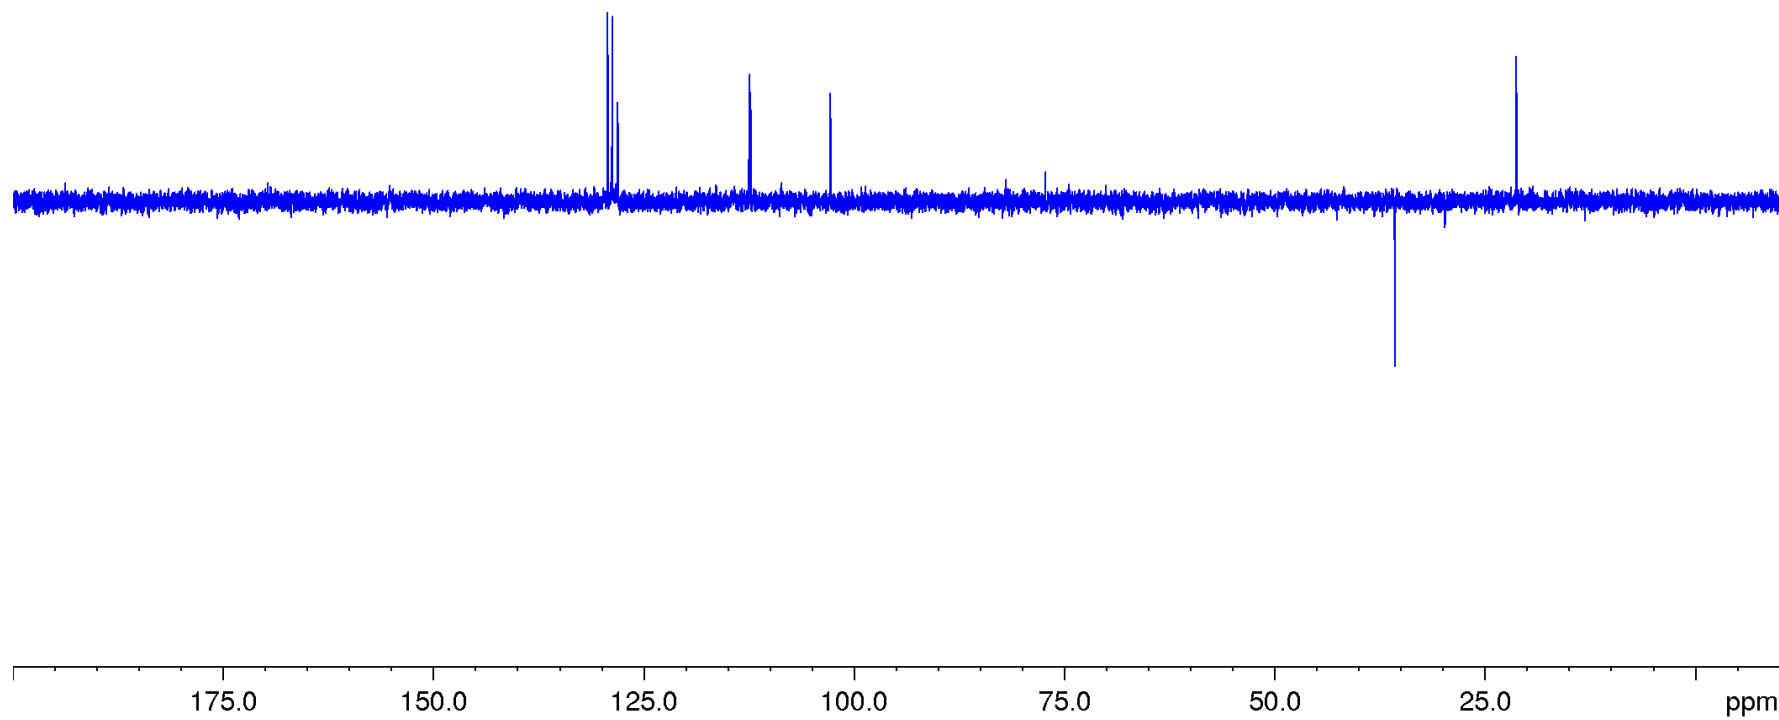

**1-(4-(3-(7-amino-3-(4-methoxyphenyl)-5-methyl-2-phenyl-1*H*-indol-1-yl)prop-1-yn-1-yl)phenyl)ethan-1-one 1k**

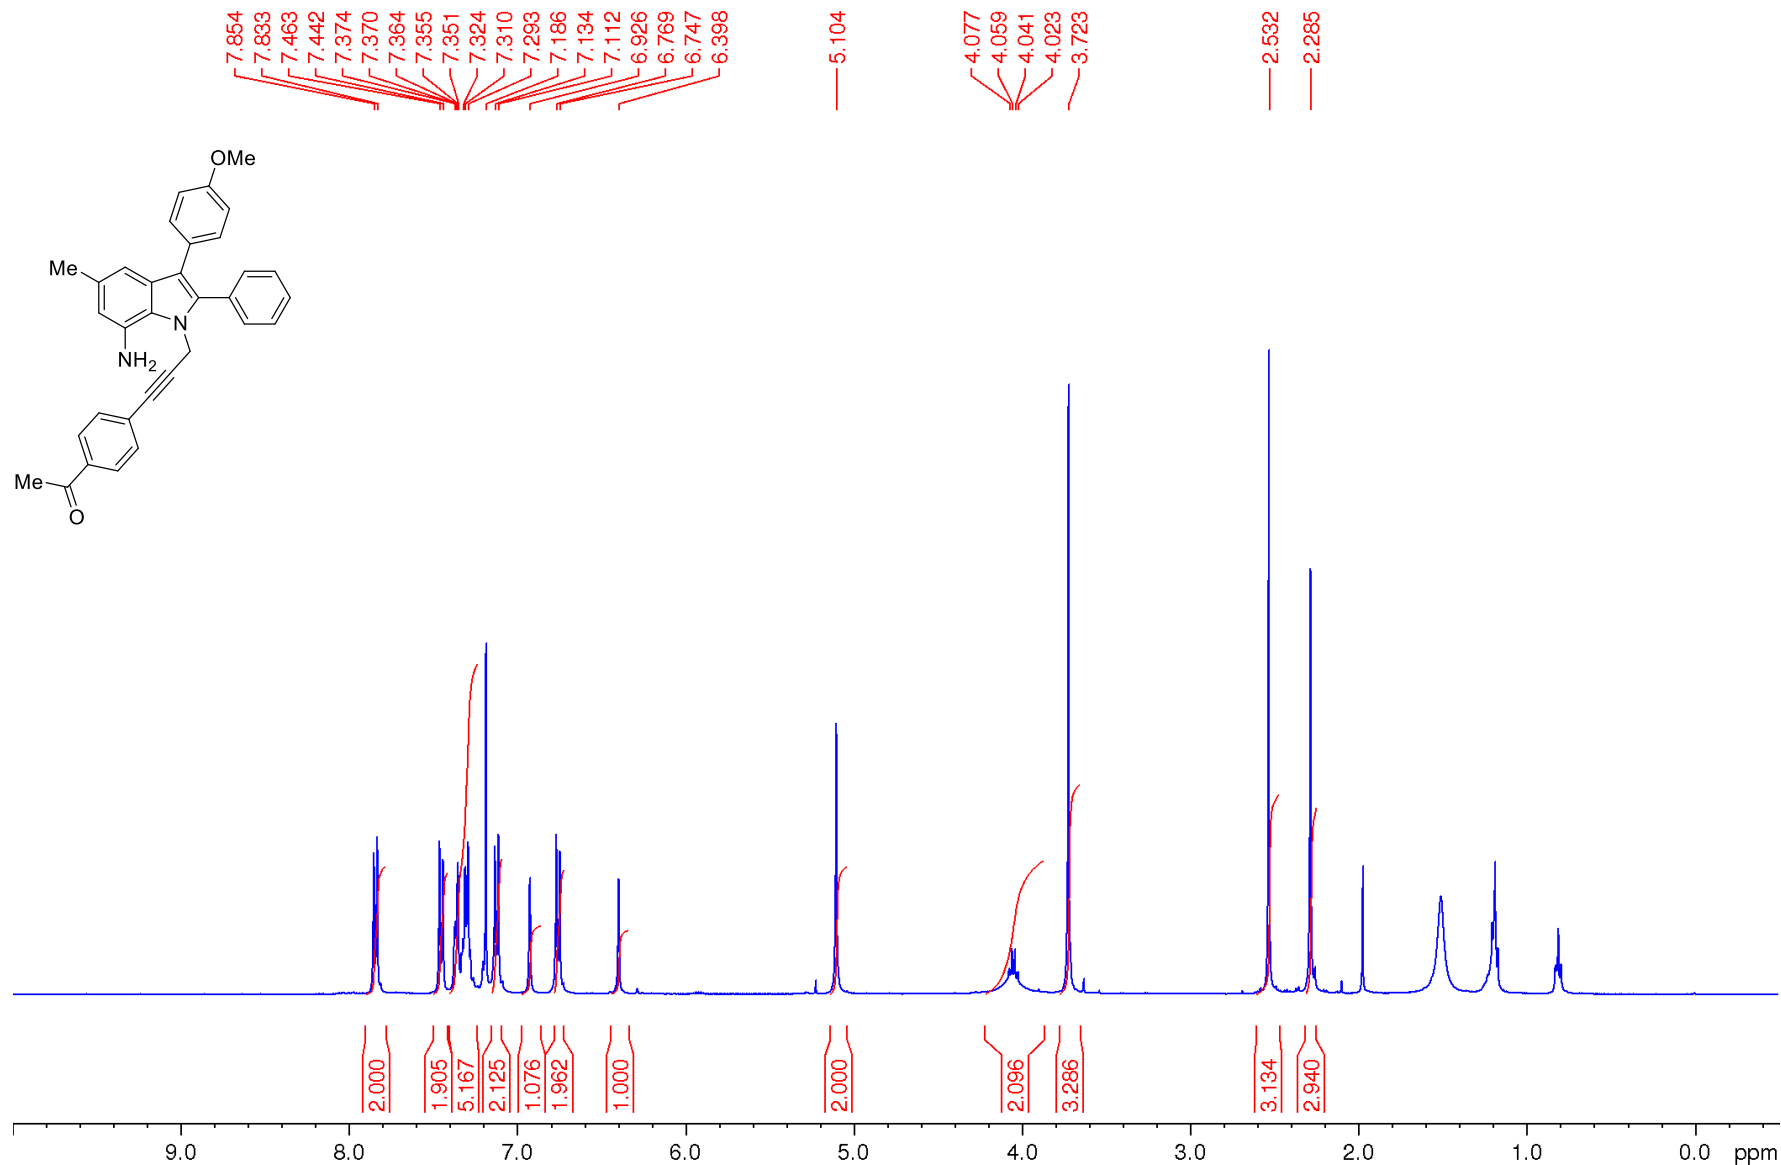

**1-(4-(3-(7-amino-3-(4-methoxyphenyl)-5-methyl-2-phenyl-1*H*-indol-1-yl)prop-1-yn-1-yl)phenyl)ethan-1-one 1k**

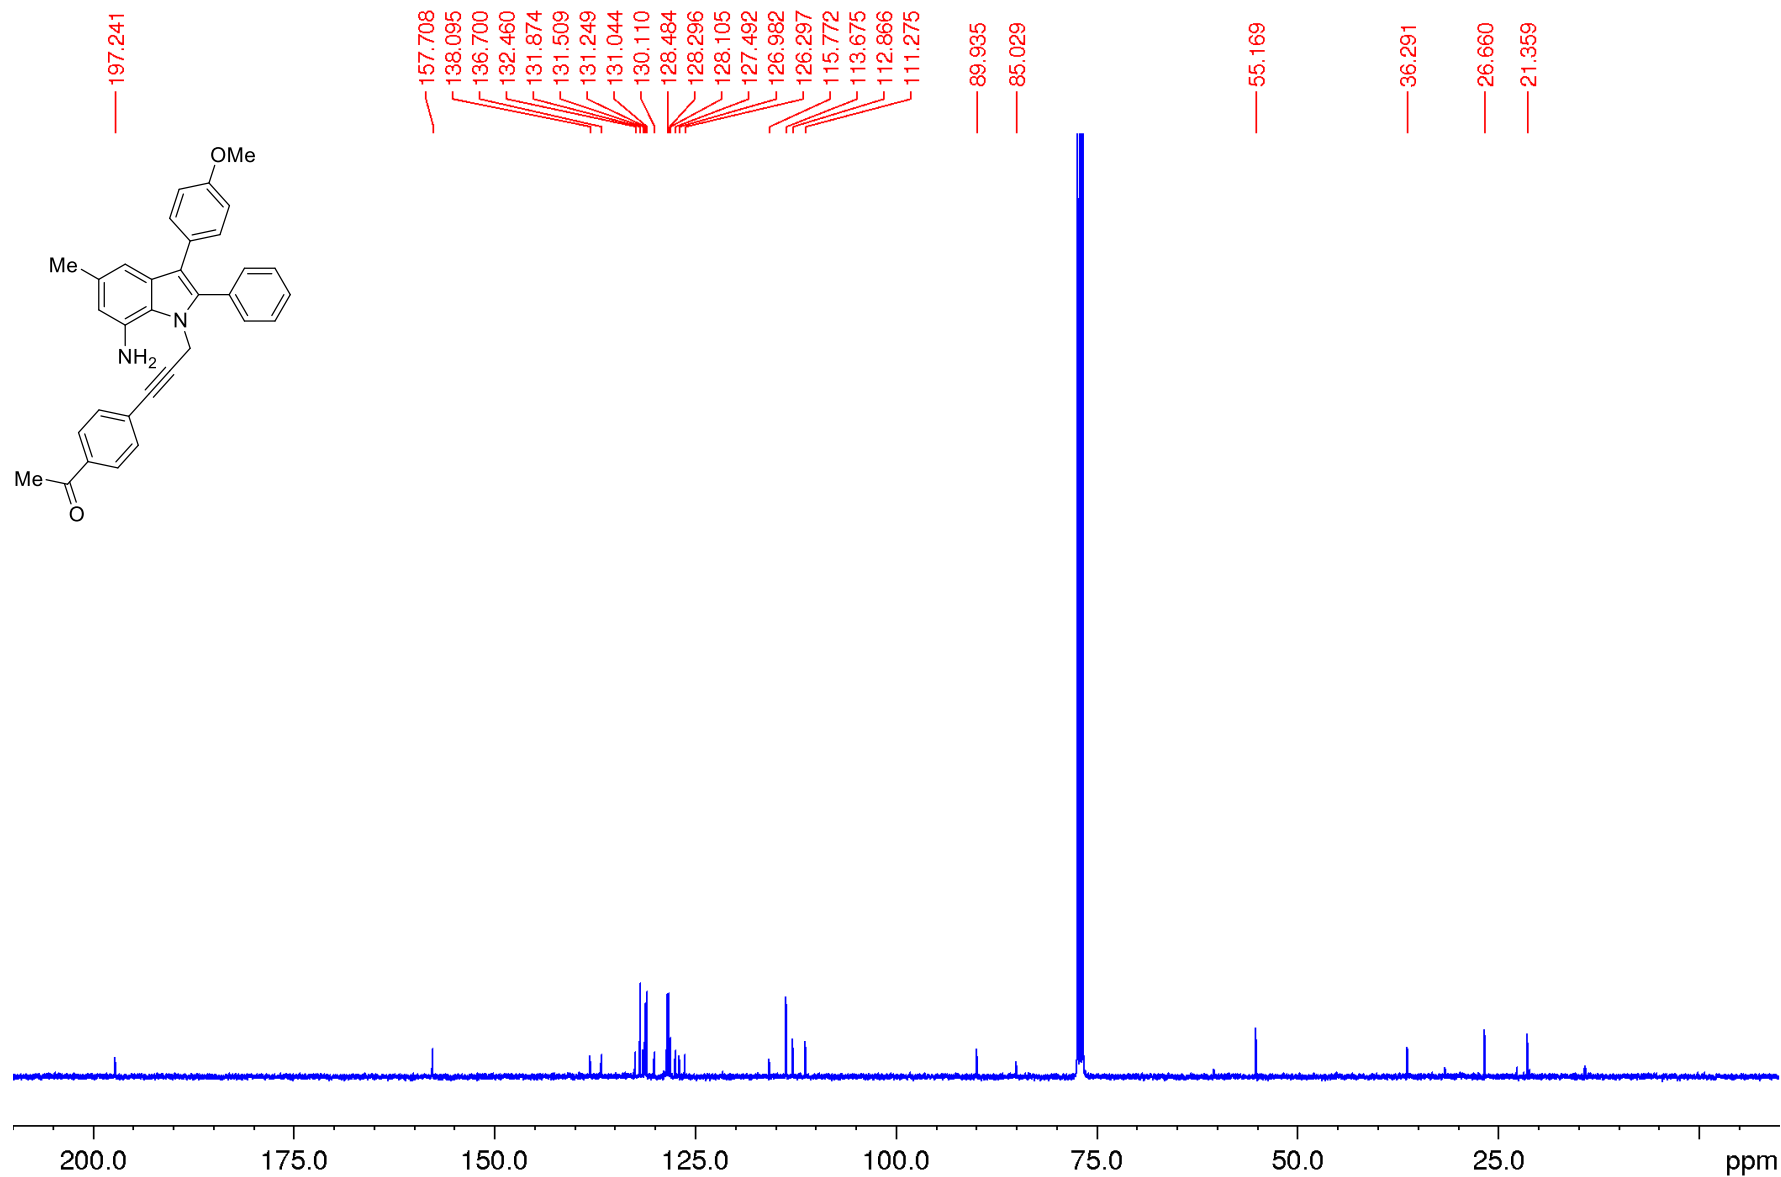

**1-(4-(3-(7-amino-3-(4-methoxyphenyl)-5-methyl-2-phenyl-1*H*-indol-1-yl)prop-1-yn-1-yl)phenyl)ethan-1-one 1k**

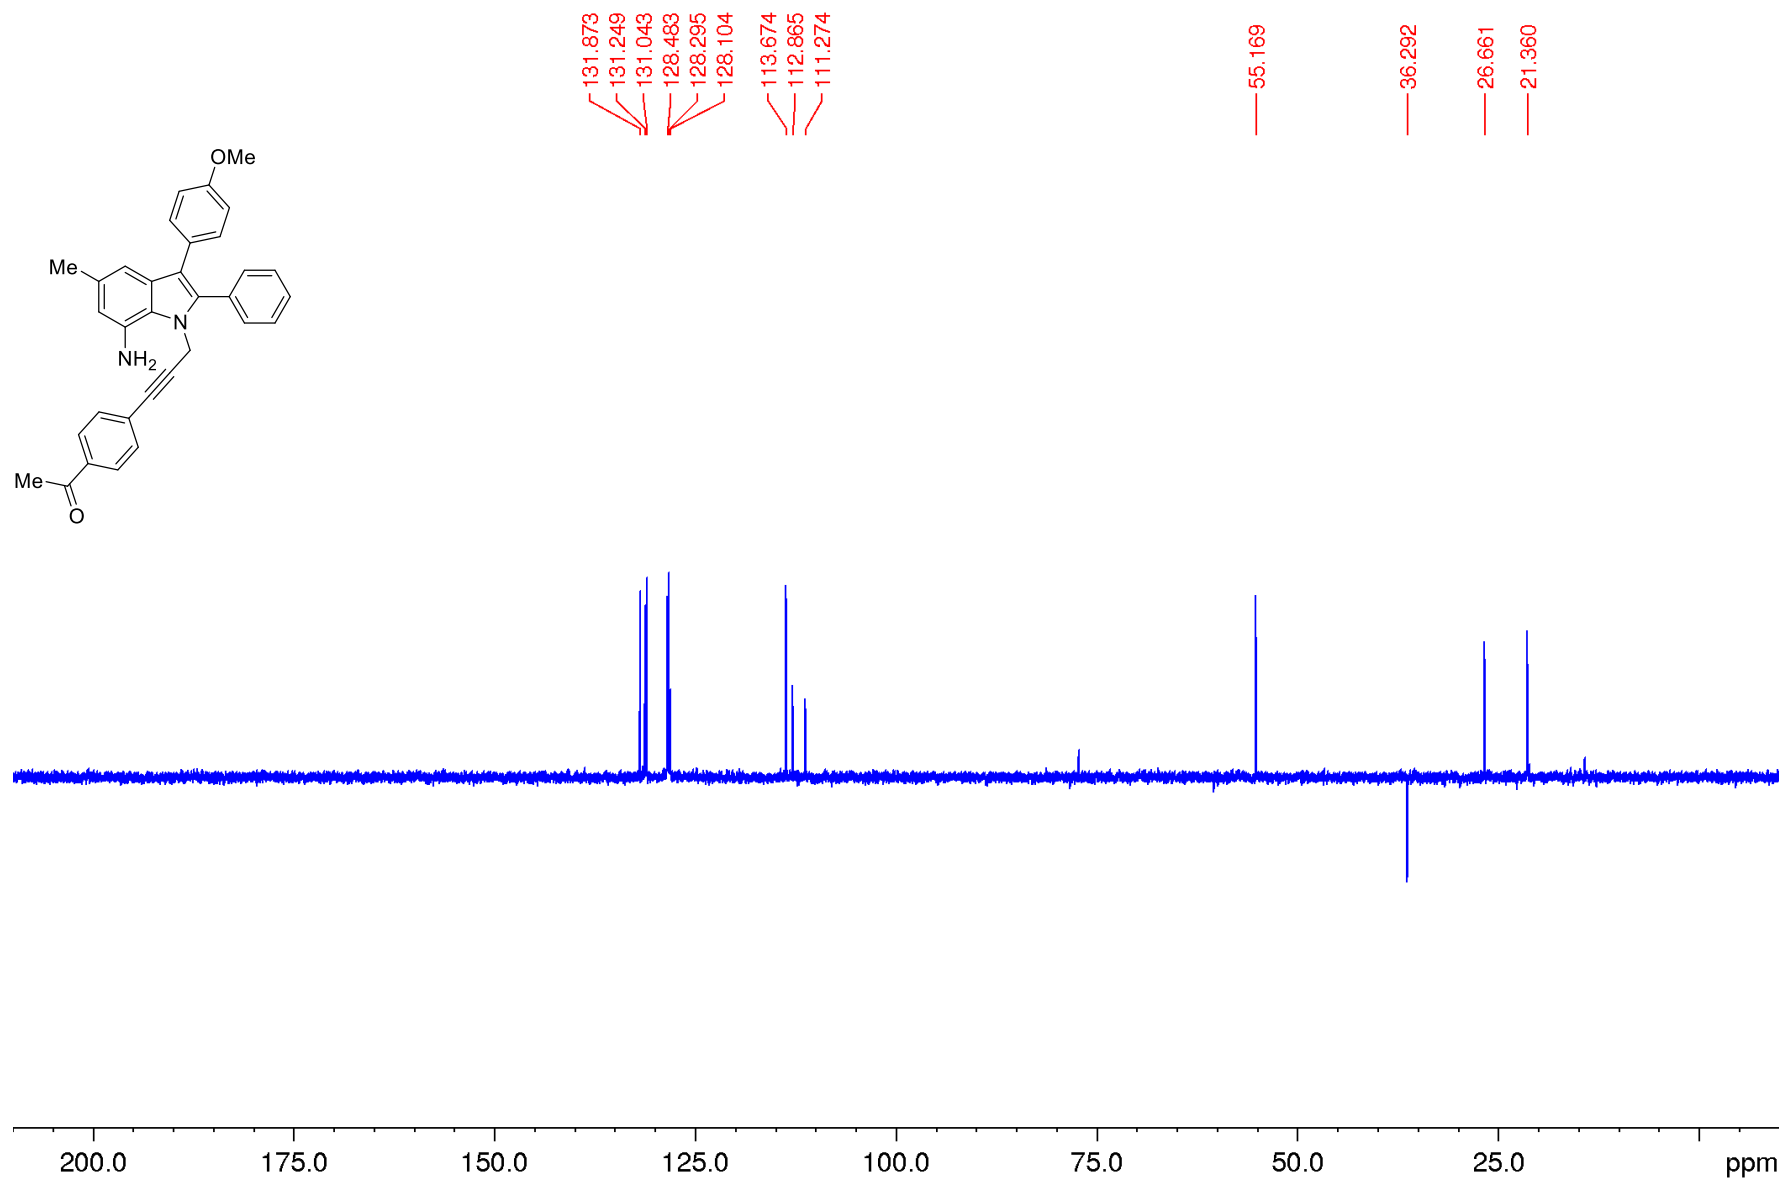







3-iodo-5-methyl-7-nitro-2-phenyl-1H-indole 11

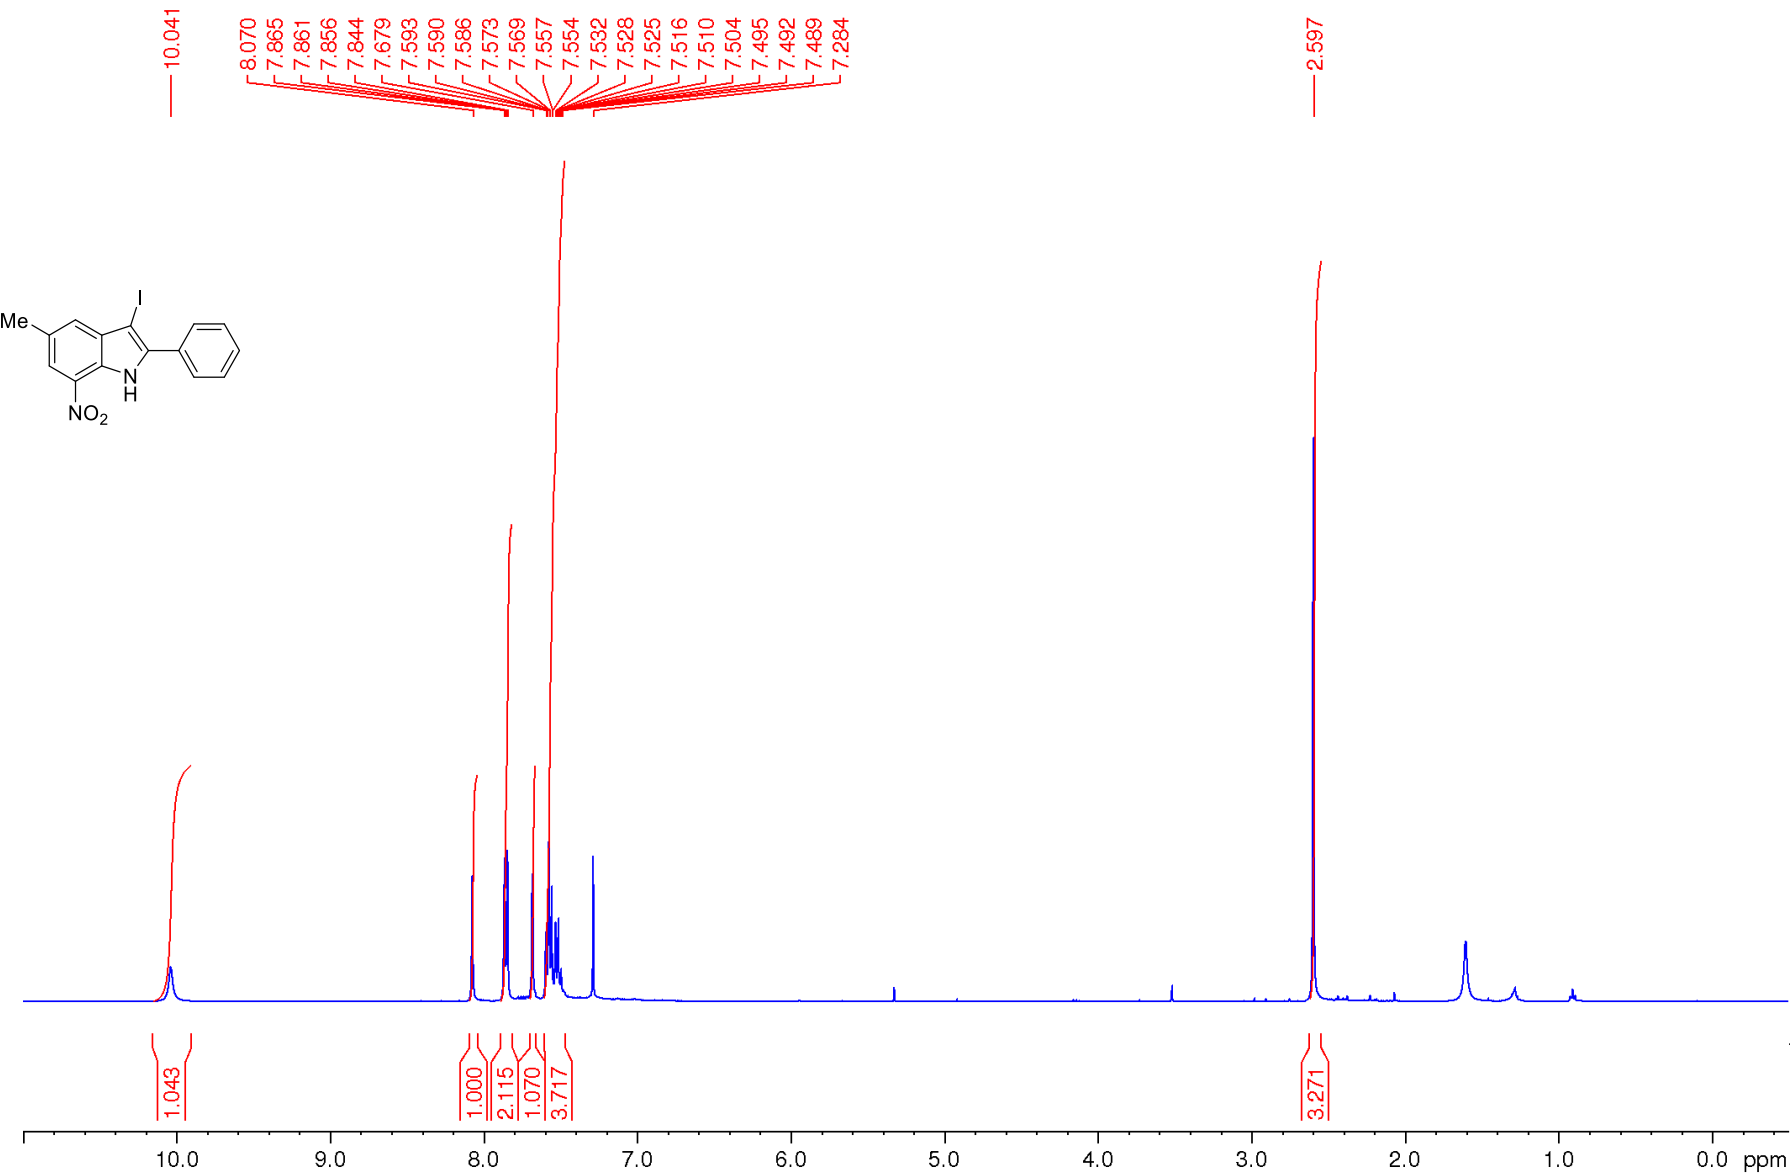

3-iodo-5-methyl-7-nitro-2-phenyl-1*H*-indole 11

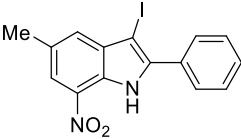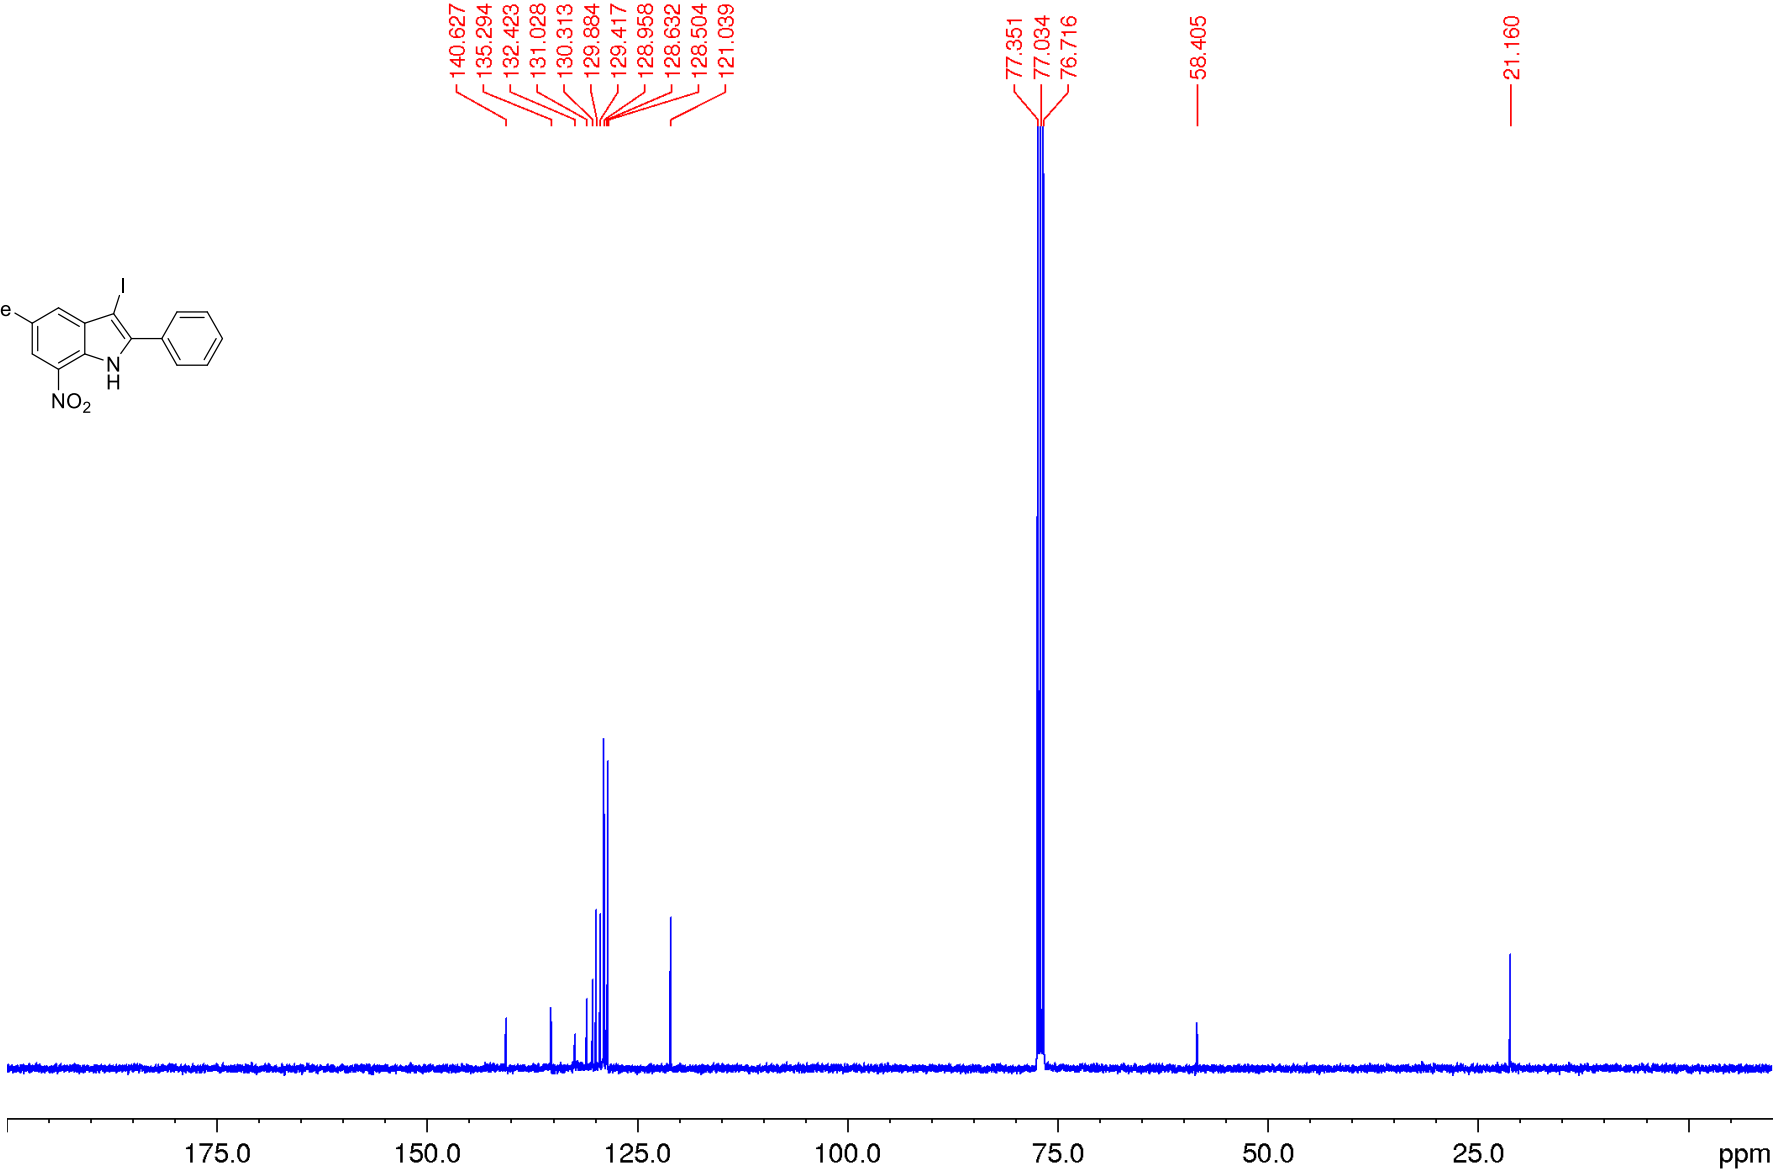

3-iodo-5-methyl-7-nitro-2-phenyl-1*H*-indole

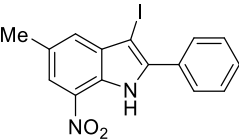

129.884  
129.417  
128.958  
128.504  
121.038

21.161

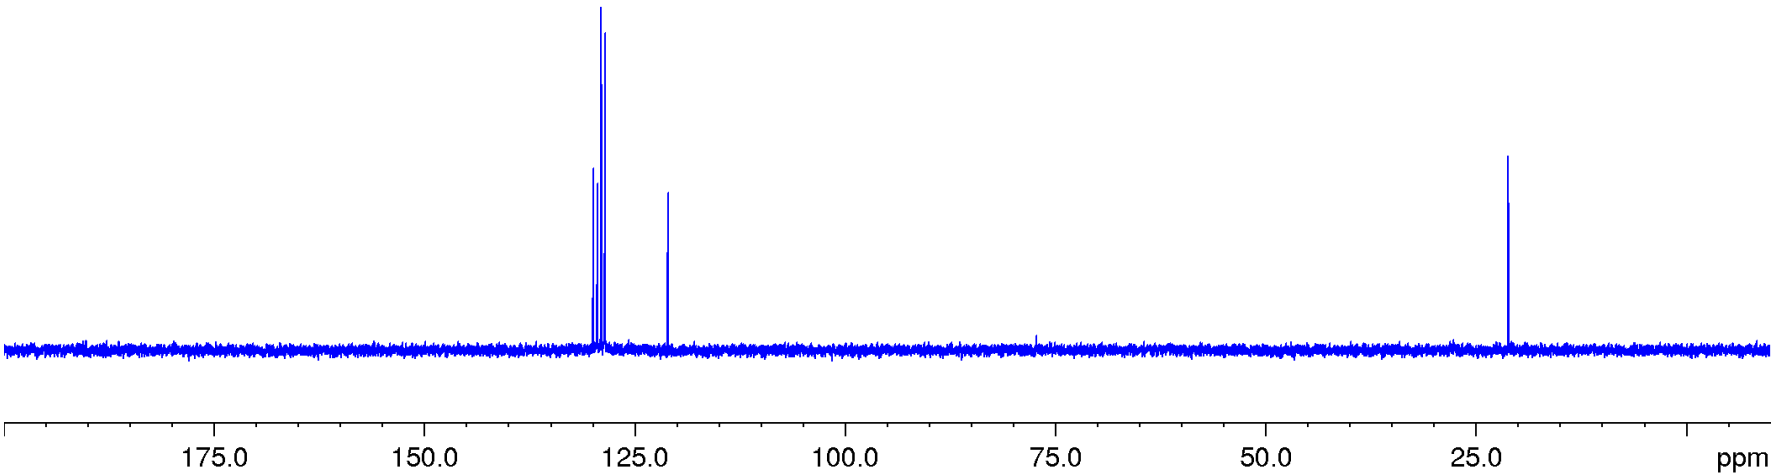

3-(4-methoxyphenyl)-5-methyl-7-nitro-2-phenyl-1H-indole 12

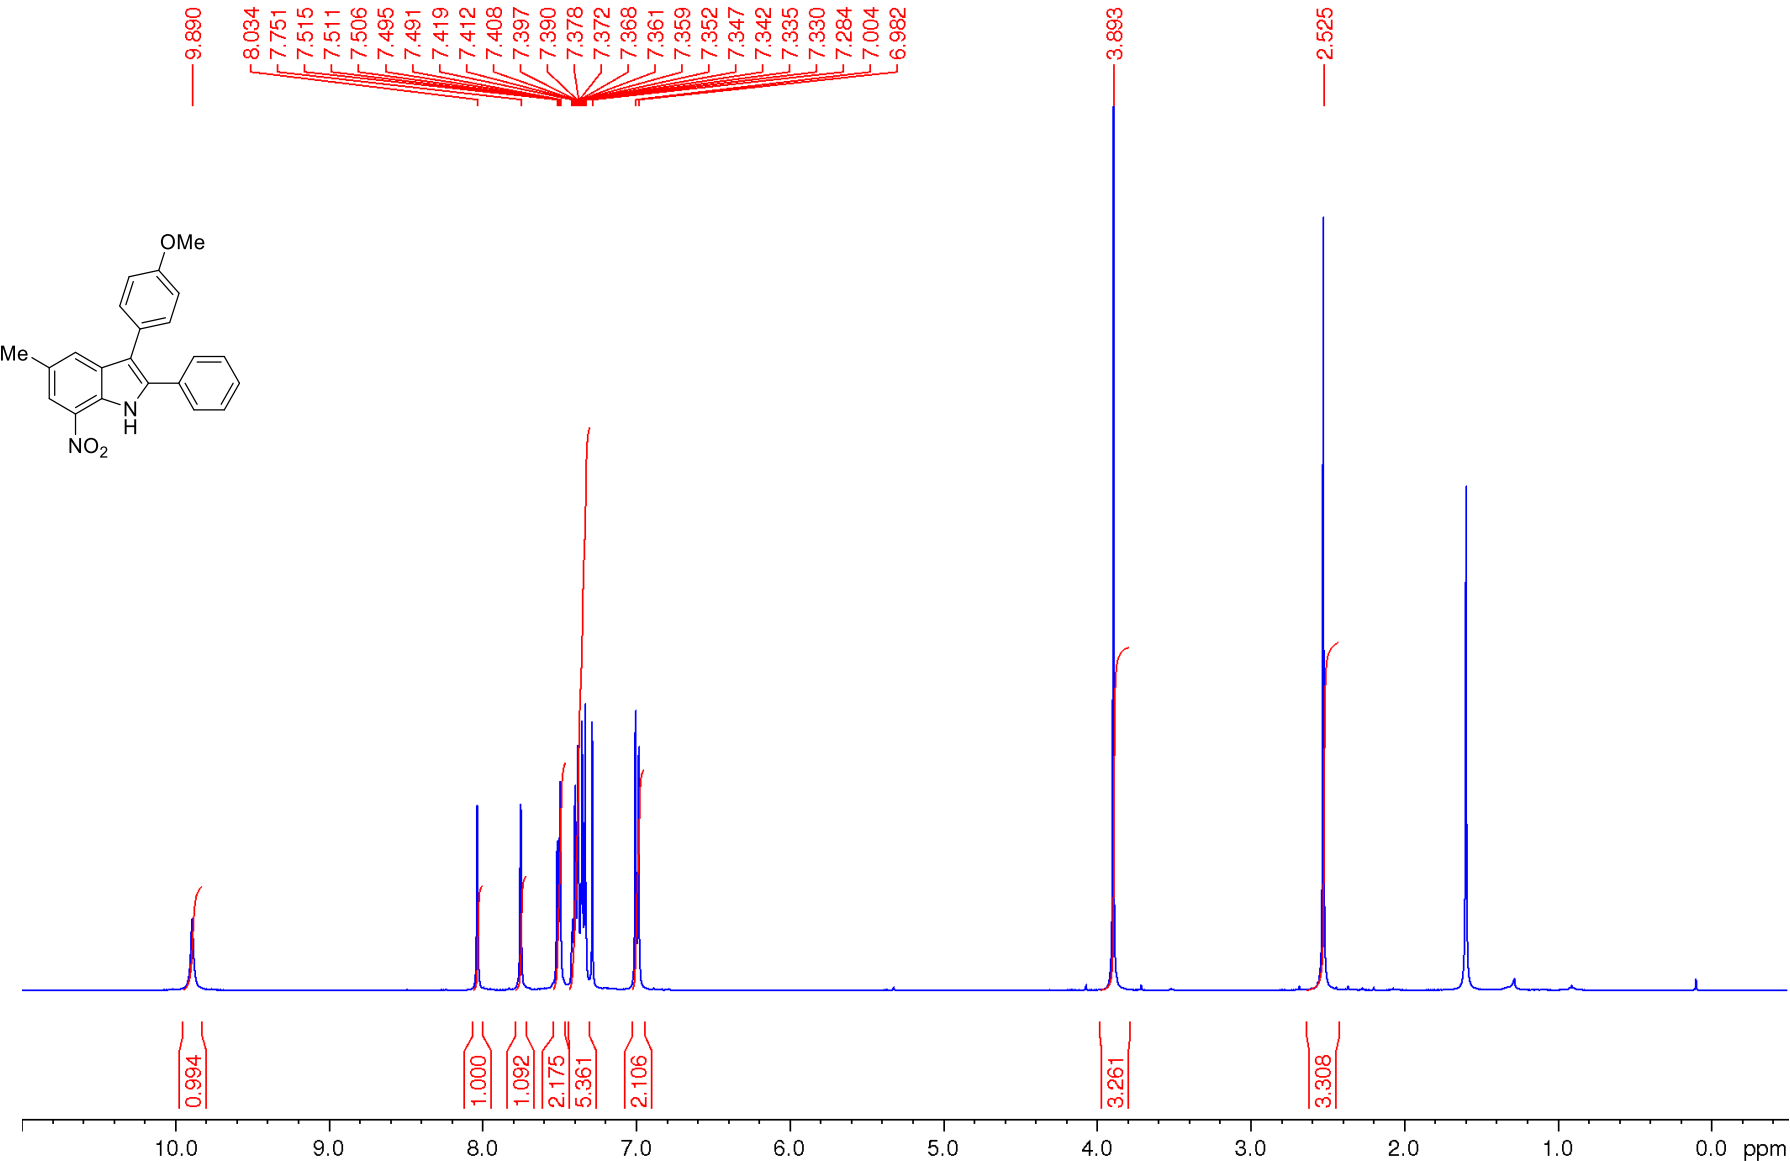

3-(4-methoxyphenyl)-5-methyl-7-nitro-2-phenyl-1H-indole 12

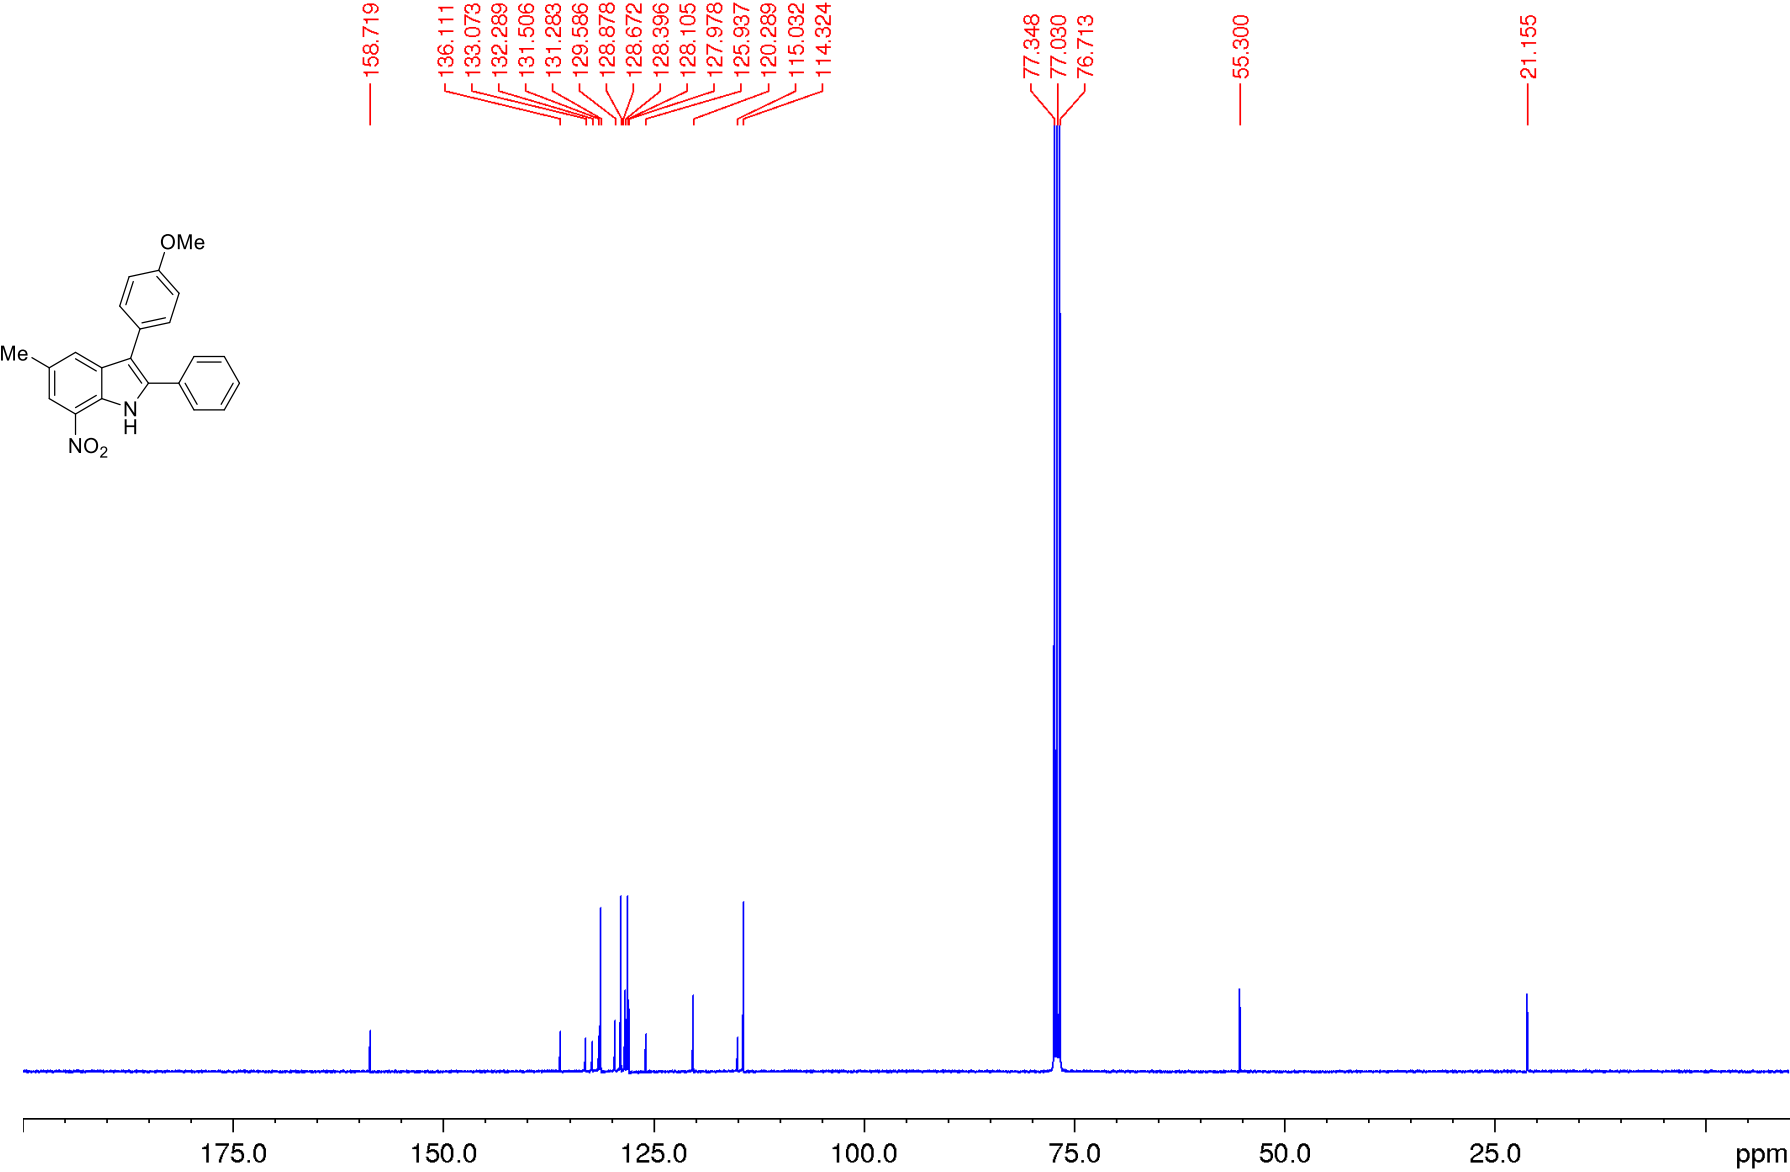

3-(4-methoxyphenyl)-5-methyl-7-nitro-2-phenyl-1H-indole 12

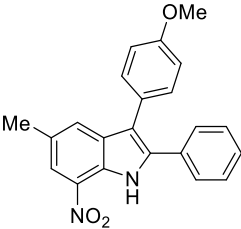

131.281  
128.877  
128.395  
128.104  
127.975  
120.288  
114.323  
55.299  
21.156

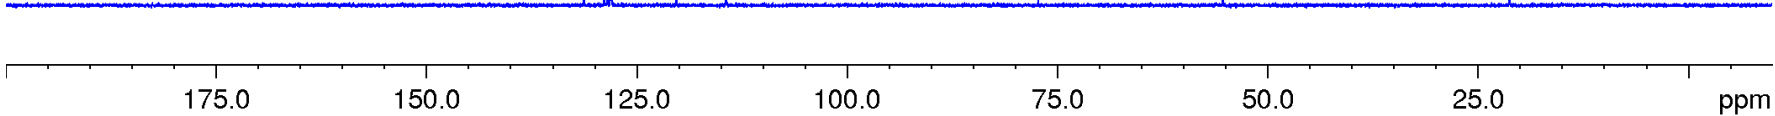

3-(4-methoxyphenyl)-5-methyl-7-nitro-2-phenyl-1-(prop-2-yn-1-yl)-1*H*-indole

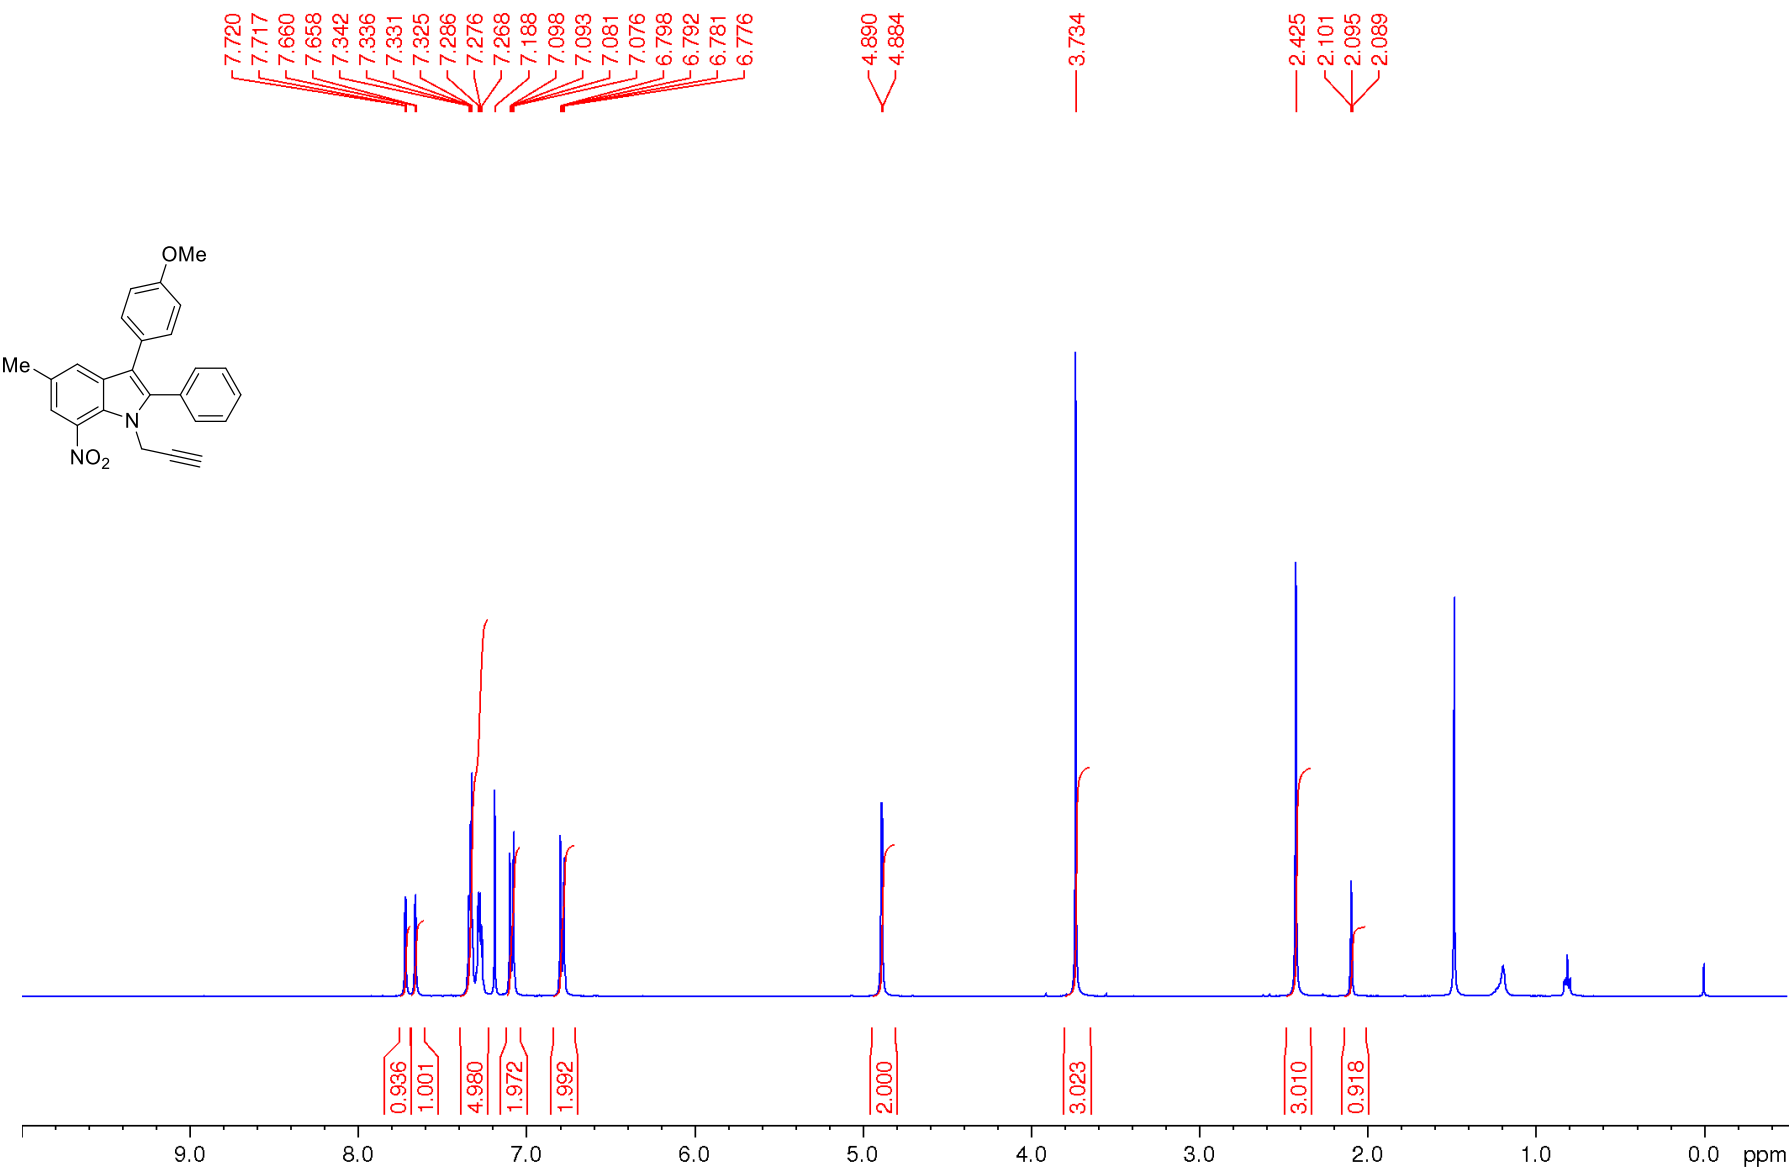



3-(4-methoxyphenyl)-5-methyl-7-nitro-2-phenyl-1-(prop-2-yn-1-yl)-1*H*-indole 13

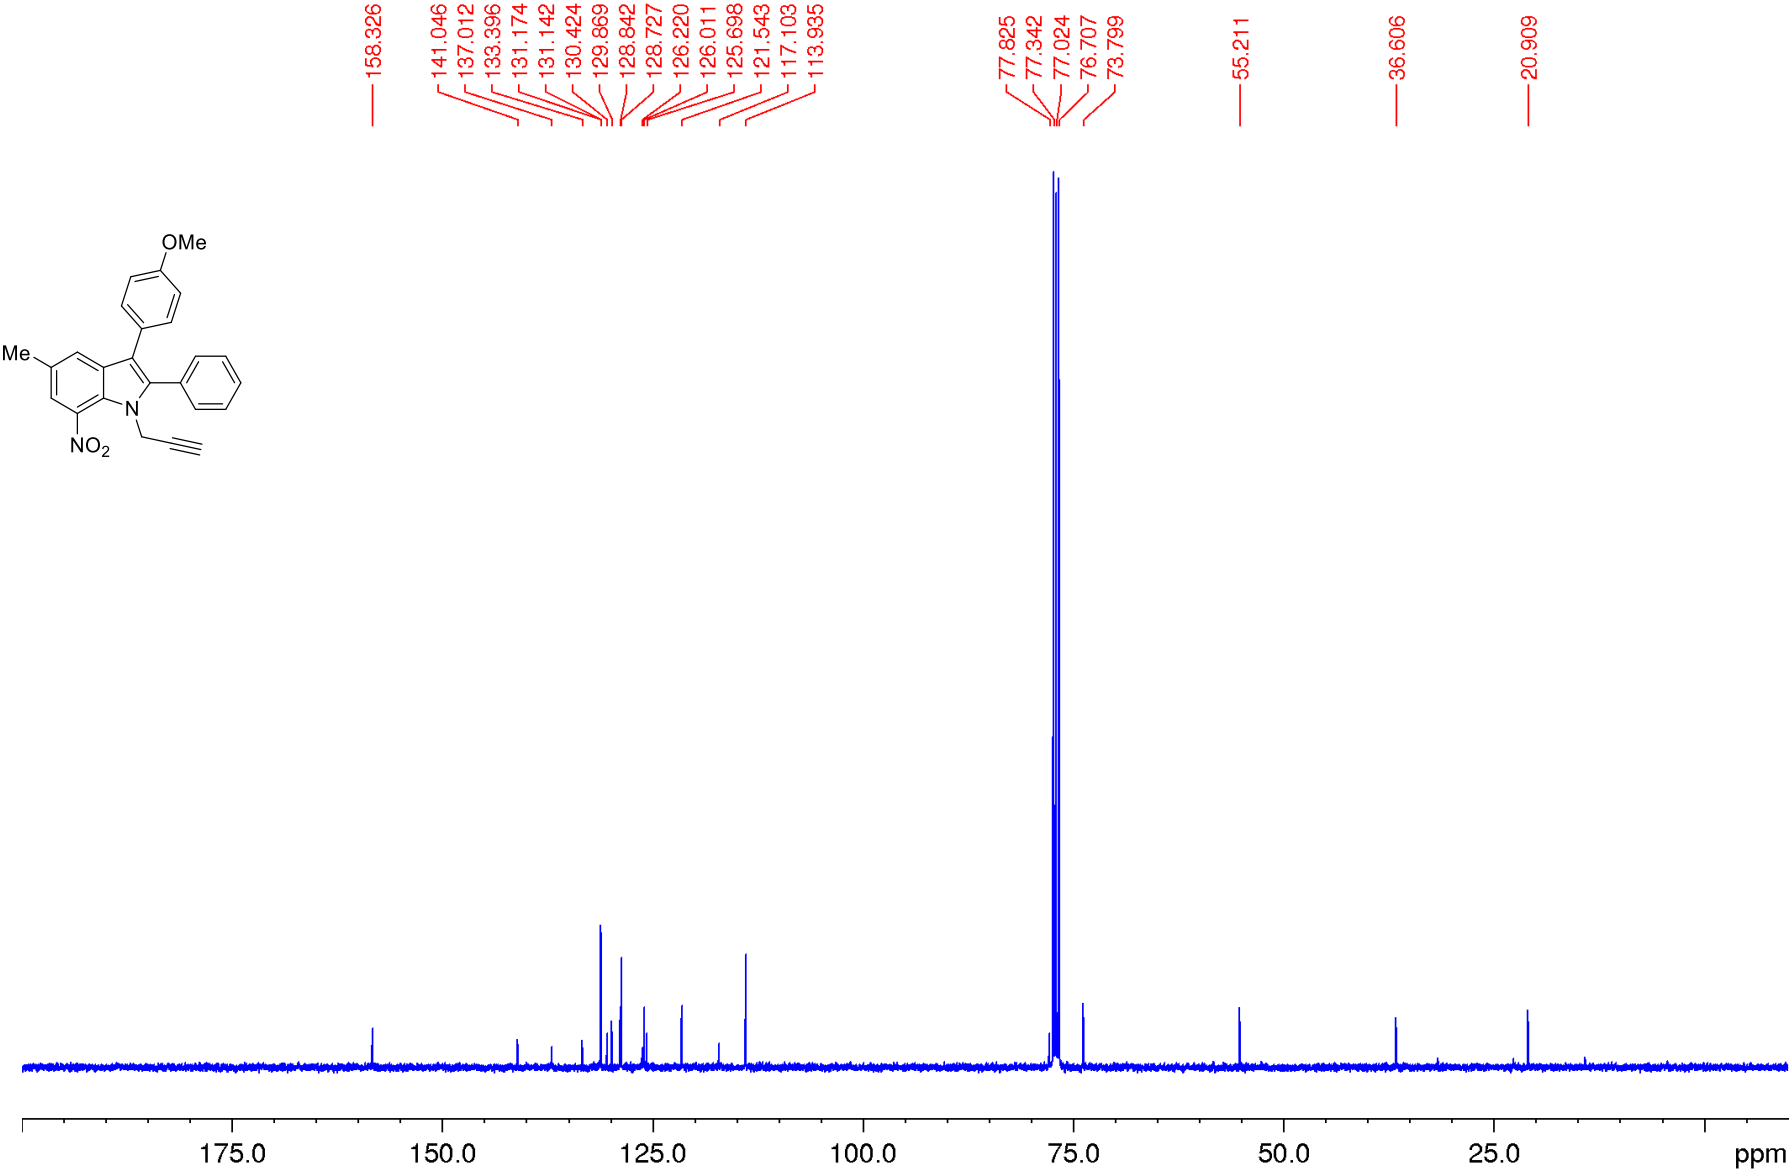

3-(4-methoxyphenyl)-5-methyl-7-nitro-2-phenyl-1-(prop-2-yn-1-yl)-1*H*-indole 13

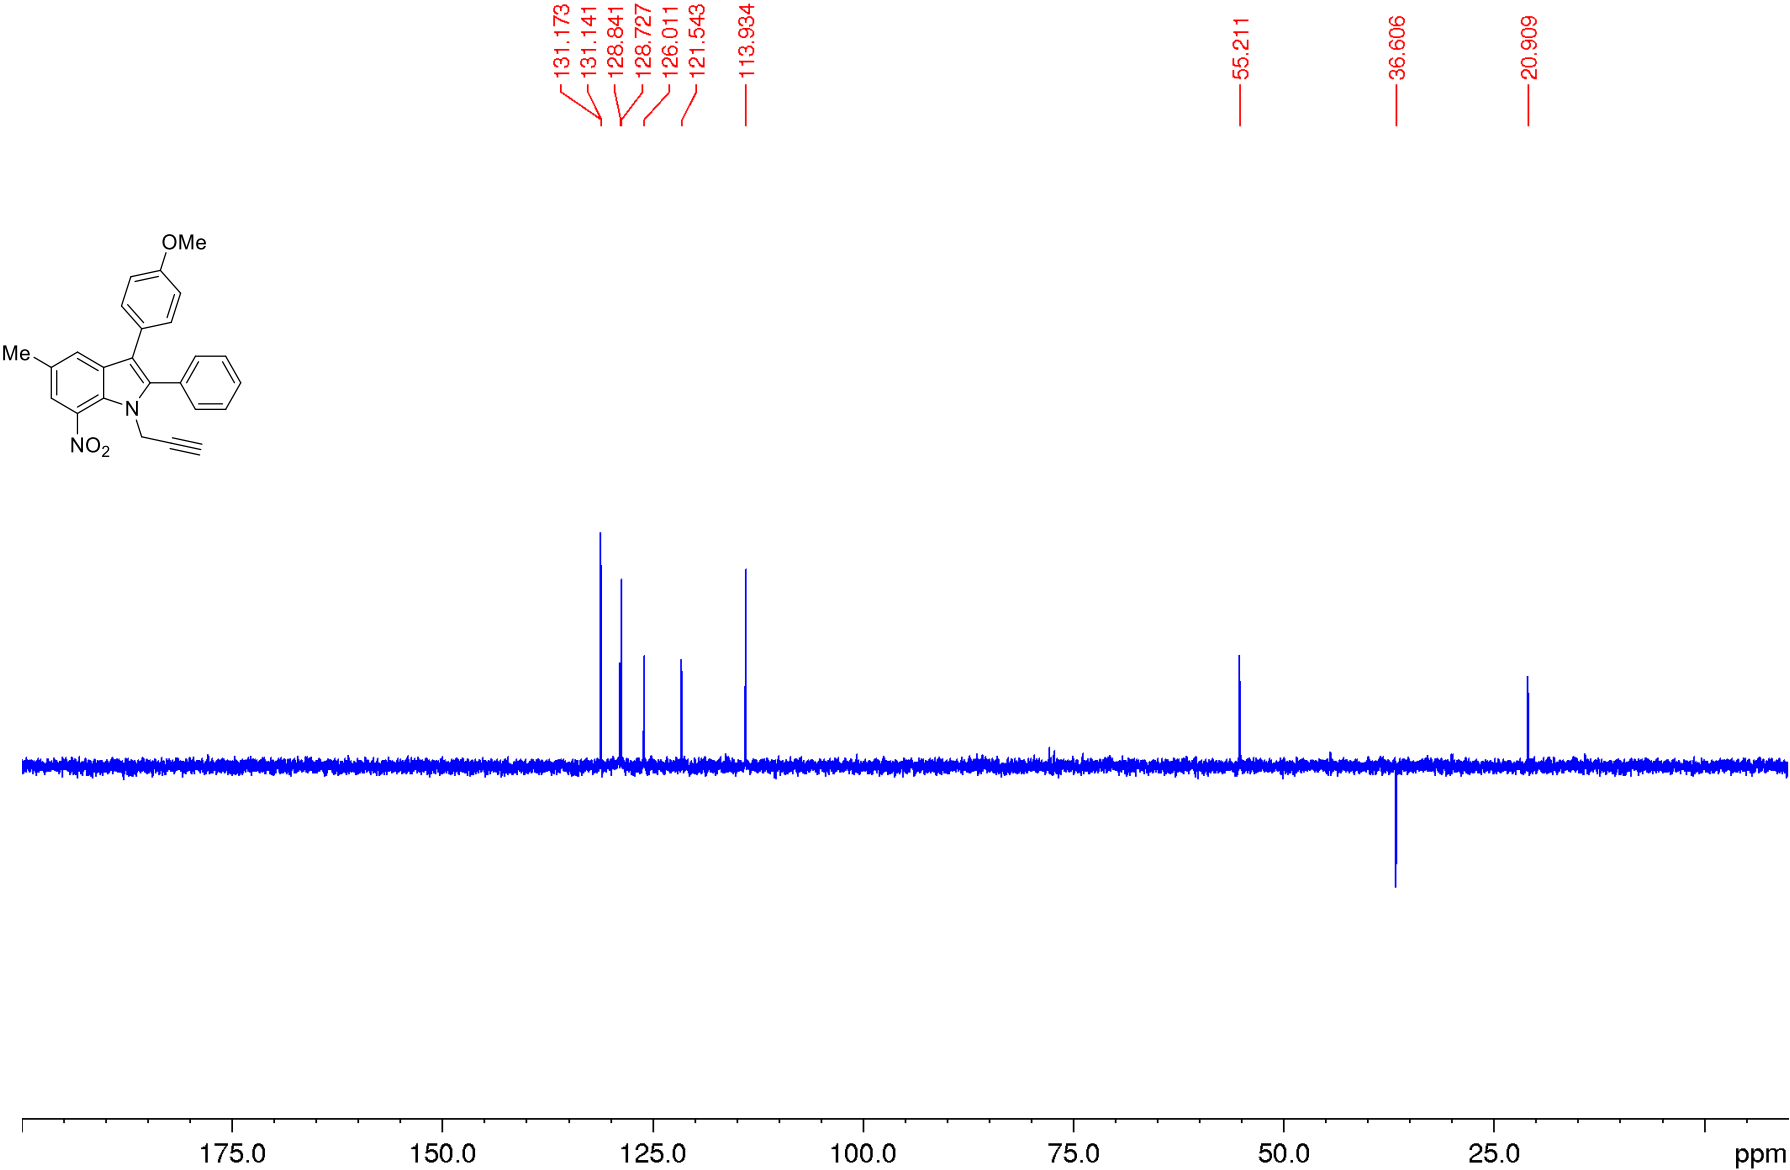

1-(4-(3-(3-(4-methoxyphenyl)-5-methyl-7-nitro-2-phenyl-1*H*-indol-1-yl)prop-1-yn-1-yl)phenyl)ethan-1-one 14

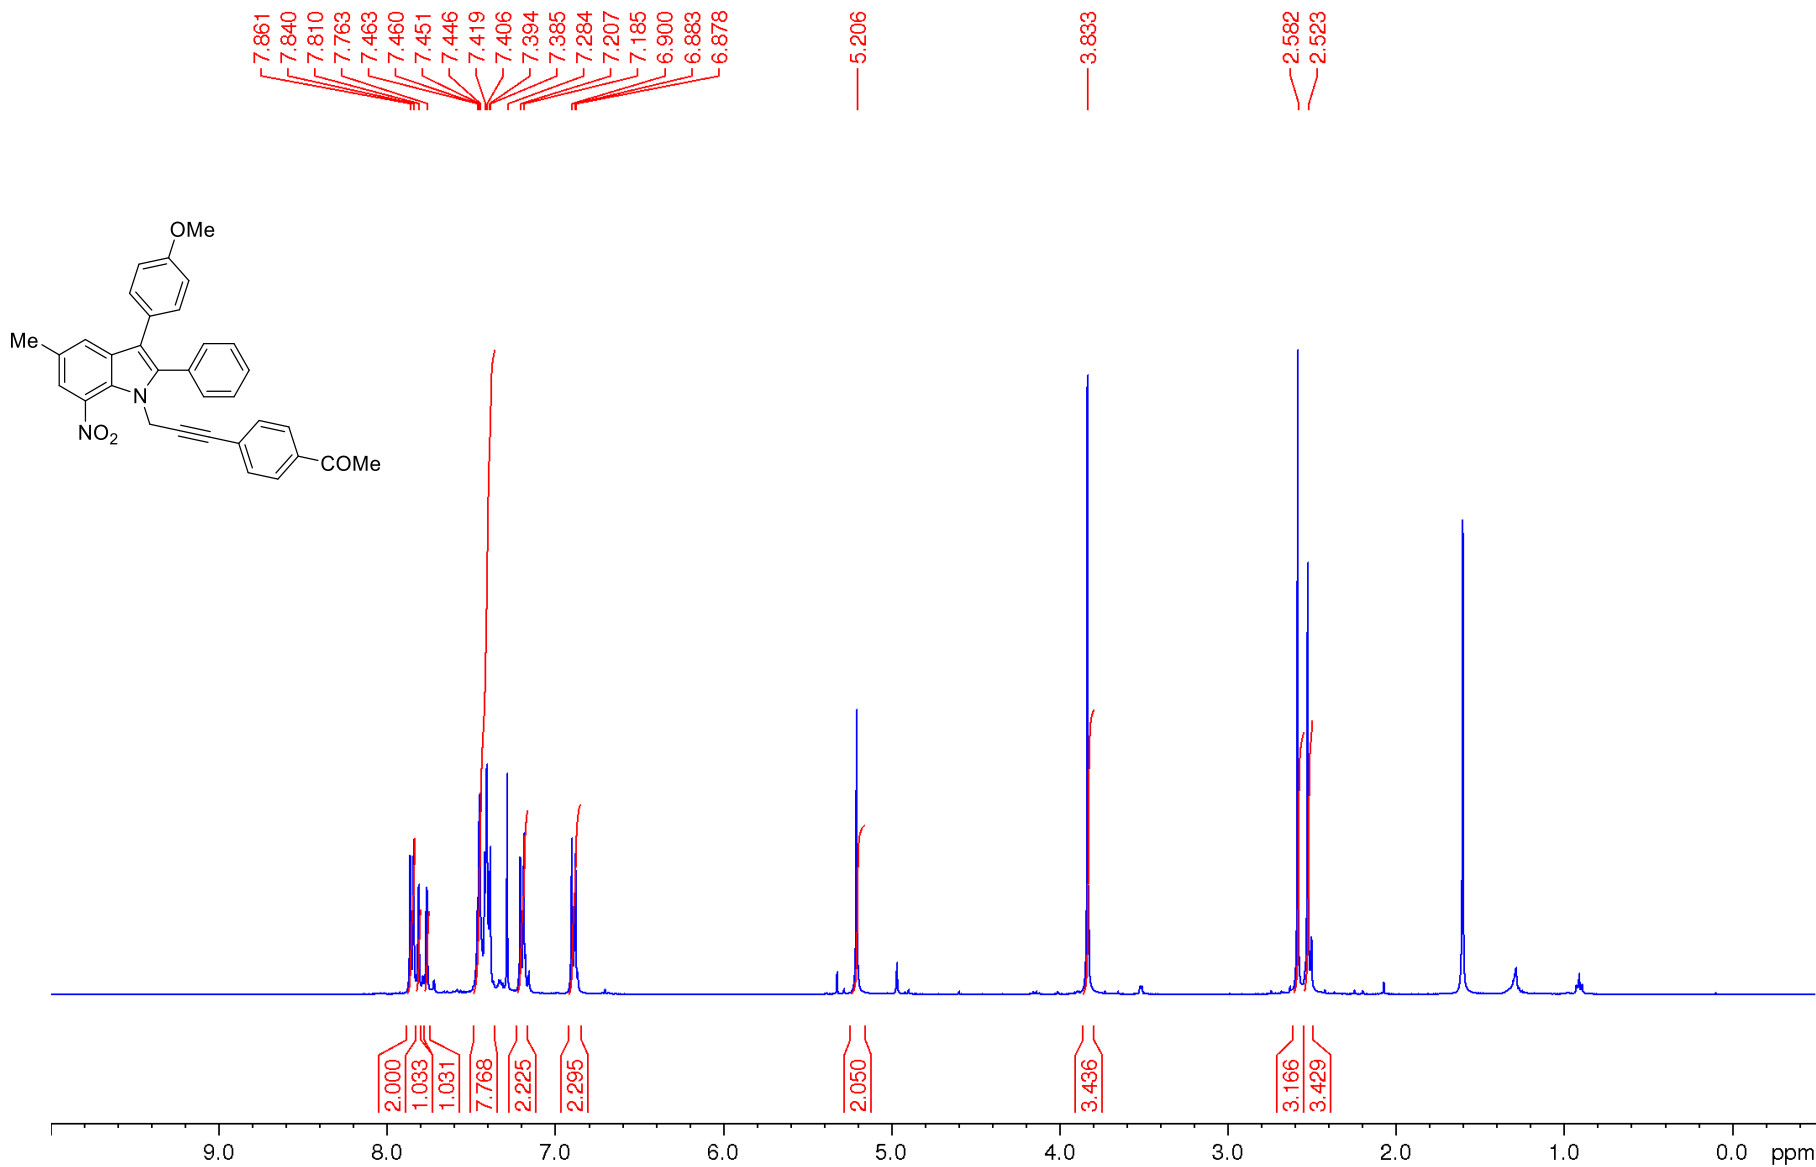

1-(4-(3-(3-(4-methoxyphenyl)-5-methyl-7-nitro-2-phenyl-1*H*-indol-1-yl)prop-1-yn-1-yl)phenyl)ethan-1-one 14

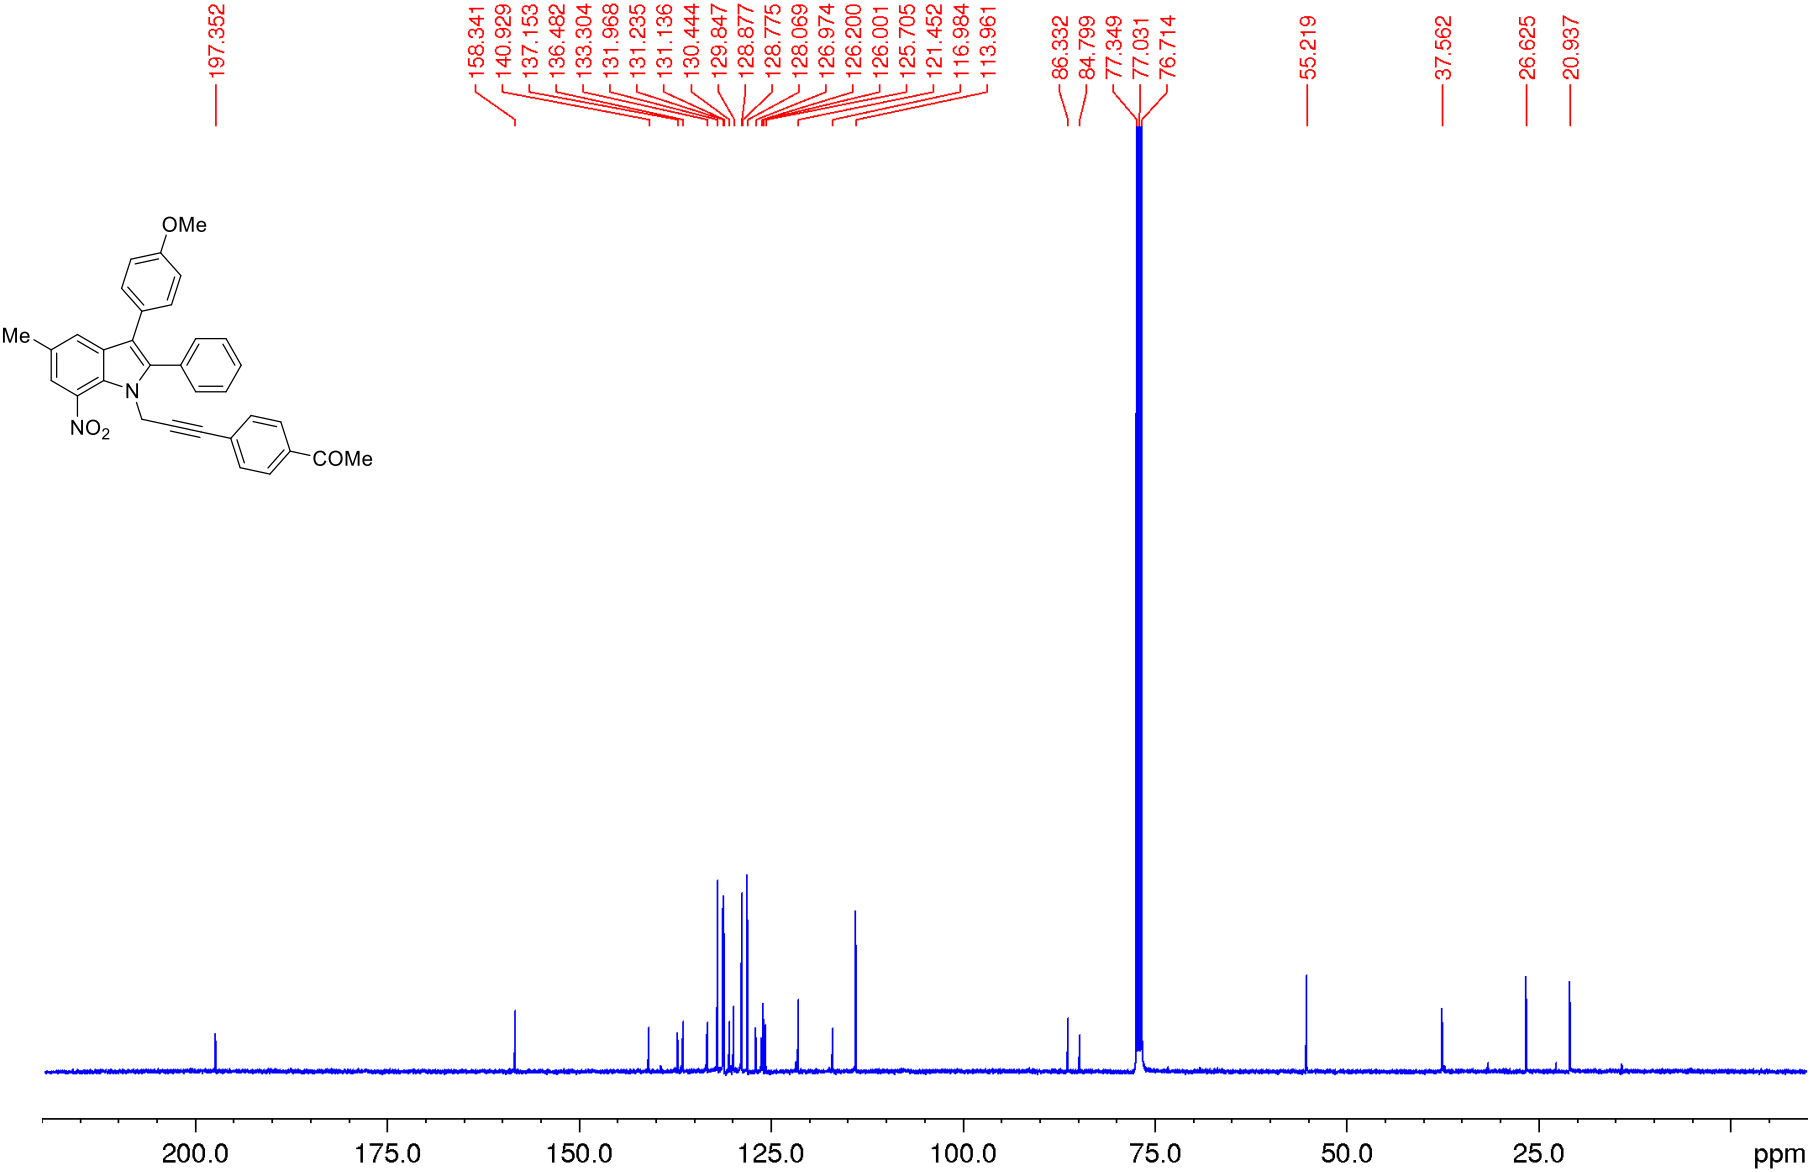

1-(4-(3-(3-(4-methoxyphenyl)-5-methyl-7-nitro-2-phenyl-1*H*-indol-1-yl)prop-1-yn-1-yl)phenyl)ethan-1-one 14

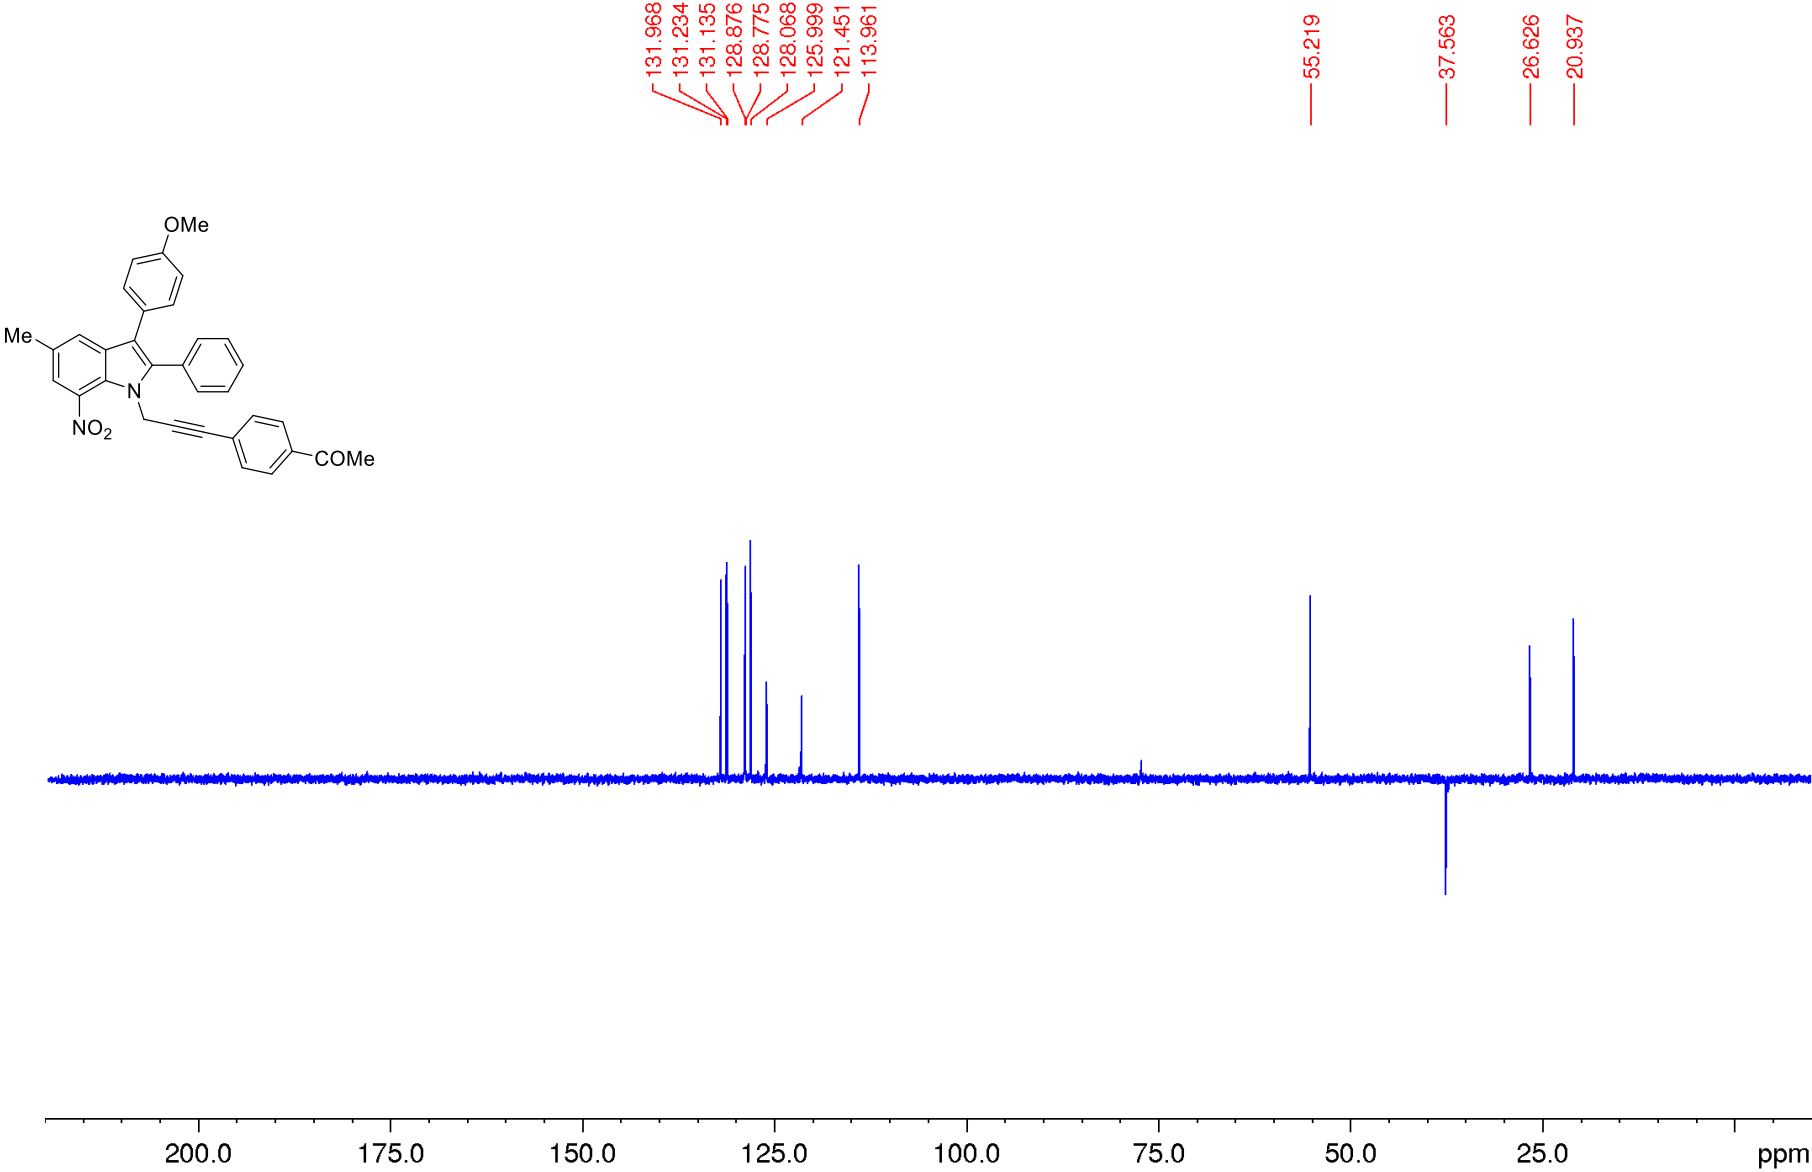

Supplement: s1 [file s1]
